# Supplementary material for: Cnih3 Deletion Dysregulates Dorsal Hippocampal Transcription across the Estrous Cycle
Source: eNeuro. 2023 Mar 13;10(3):ENEURO.0153-22.2023. doi: 10.1523/ENEURO.0153-22.2023 (PMC10027183; doi:10.1523/ENEURO.0153-22.2023)
Supplement: Extended Data Table 1-1 — RNA-seq QC results (read depth, and percent of reads mapped, uniquely mapping, and multimapped) and sample metadata including age in weeks. Download Table 1-1, XLS file. [file enu-eN-NWR-0153-22-s12.xls]

## Sheet: Supp_Table_1_062222
Sample Name	Sample ID	Estrus Stage	Genotype	Sex	Age (weeks)	Parent Genotype (CNIH3 x B6 or B6 x B6)	Total RNA Extracted (ng)	RIN	Number of RNA-seq reads	Number of Reads Mapped	Read map %	Number of Uniquely Mapping Reads	Uniquely Mapping Read %	Number of Multimapping Reads	Multimapping Read %
sample.9_1	9_1	E	KO	Female	20	CNIH3 x B6	537.6	8.3	37475563	37371542	99.72	34057642	90.88	3313900	8.84
sample.8_4	8_4	E	KO	Female	20.7143	CNIH3 x B6	371.7	8.6	30968229	30870069	99.68	28091443	90.71	2778626	8.97
sample.8_3	8_3	E	WT	Female	20.2857	CNIH3 x B6	378	8.5	34709190	34602846	99.7	31136162	89.71	3466684	9.99
sample.8_2	8_2	P	WT	Female	17.1429	CNIH3 x B6	415.8	7.6	29236028	29127860	99.63	25871395	88.49	3256465	11.14
sample.8_1	8_1	D	WT	Female	17.1429	CNIH3 x B6	336	8.9	30158266	30061543	99.68	27086243	89.81	2975300	9.87
sample.7_2	7_2	M	KO	Female	22.5714	CNIH3 x B6	323.4	8.8	34069314	33955788	99.66	30861295	90.58	3094493	9.08
sample.7_1	7_1	D	KO	Female	23.4286	CNIH3 x B6	441	8.3	37215255	37109384	99.72	33815874	90.87	3293510	8.85
sample.6_1	6_1	M	KO	Female	20.5714	CNIH3 x B6	424.2	8.6	38399128	38272531	99.67	34671312	90.29	3601219	9.38
sample.5_4	5_4	P	WT	Female	13.5714	B6 x B6	413.7	8	35816998	35714138	99.71	32712925	91.33	3001213	8.38
sample.5_3	5_3	E	WT	Female	16.8571	B6 x B6	346.5	8.6	34940566	34828471	99.68	31410413	89.9	3418058	9.78
sample.5_2	5_2	E	WT	Female	16.8571	B6 x B6	329.7	8.9	20504969	20431075	99.64	18080755	88.18	2350320	11.46
sample.5_1	5_1	M	WT	Female	16.7143	B6 x B6	413.7	8.5	31627471	31535809	99.71	28786505	91.02	2749304	8.69
sample.4_1	4_1	P	WT	Female	15.8571	B6 x B6	453.6	7.9	33308888	33216143	99.72	30264322	90.86	2951821	8.86
sample.380_4	380_4	D	WT	Female	17	B6 x B6	558.6	8.9	36527569	36424779	99.71	33329261	91.24	3095518	8.47
sample.380_1	380_1	M	WT	Female	17	B6 x B6	613.2	8.7	37158680	37042315	99.68	33596384	90.41	3445931	9.27
sample.3_3	3_3	M	WT	Female	18.5714	B6 x B6	317.1	8.7	33389207	33280693	99.67	29957818	89.72	3322875	9.95
sample.3_2	3_2	E	WT	Female	19.4286	B6 x B6	342.3	8.4	35017664	34897680	99.66	31399306	89.67	3498374	9.99
sample.3_1	3_1	E	WT	Female	16.2857	B6 x B6	359.1	8.3	32414224	32306273	99.67	29006224	89.49	3300049	10.18
sample.20_2	20_2	P	WT	Female	12	B6 x B6	369.6	8.7	39255566	39137026	99.7	35909682	91.48	3227344	8.22
sample.2_3	2_3	P	WT	Female	18.7143	B6 x B6	392.7	8.2	16639832	16591816	99.72	15116481	90.85	1475335	8.87
sample.2_2	2_2	D	WT	Female	16.4286	B6 x B6	445.2	8.4	25942161	25858989	99.68	23517332	90.65	2341657	9.03
sample.2_1	2_1	E	WT	Female	16.4286	B6 x B6	420	8.4	35164778	35057178	99.69	32004016	91.01	3053162	8.68
sample.19_1	19_1	male	WT	Male	12	B6 x B6	495.6	8.5	36486358	36344093	99.61	33295750	91.26	3048343	8.35
sample.14_4	14_4	M	KO	Female	13.2857	CNIH3 x B6	567	8.6	31574546	31479044	99.69	28892038	91.5	2587006	8.19
sample.14_2	14_2	P	KO	Female	13.5714	CNIH3 x B6	512.4	8.3	22718031	22629756	99.61	20219831	89	2409925	10.61
sample.14_1	14_1	P	KO	Female	14.5714	CNIH3 x B6	352.8	8.7	32425130	32323122	99.68	28975386	89.36	3347736	10.32
sample.13_1	13_1	M	WT	Female	13	CNIH3 x B6	407.4	8.4	29029915	28926176	99.64	25962392	89.43	2963784	10.21
sample.12_5	12_5	P	KO	Female	13	CNIH3 x B6	428.4	8.4	37593230	37483570	99.71	34265889	91.15	3217681	8.56
sample.12_4	12_4	P	KO	Female	13	CNIH3 x B6	424.2	8.3	38897436	38774627	99.68	34938763	89.82	3835864	9.86
sample.12_3	12_3	E	KO	Female	16.2857	CNIH3 x B6	432.6	8.6	38148019	38036558	99.71	35086642	91.98	2949916	7.73
sample.12_2	12_2	E	KO	Female	16.2857	CNIH3 x B6	512.4	8.5	36178958	36074354	99.71	32687016	90.35	3387338	9.36
sample.12_1	12_1	E	KO	Female	13	CNIH3 x B6	413.7	8.9	34771357	34657377	99.67	31342122	90.14	3315255	9.53
sample.11_1	11_1	M	KO	Female	13.5714	CNIH3 x B6	667.8	8.9	33874603	33775643	99.71	30741214	90.75	3034429	8.96
sample.10_1	10_1	M	KO	Female	18.7143	CNIH3 x B6	417.9	8.5	39062859	38907198	99.6	35488479	90.85	3418719	8.75
sample.1_1	1_1	E	WT	Female	17.7143	B6 x B6	457.8	8.2	41706695	41584230	99.71	37668137	90.32	3916093	9.39
sample.2593	2593	E	KO	Female	16.2857	CNIH3 x B6	529.2	8.8	37979392	37855403	99.67	34080476	89.73	3774927	9.94
sample.2592	2592	D	KO	Female	16.2857	CNIH3 x B6	592.2	8.8	37478510	37369149	99.71	33901940	90.46	3467209	9.25
sample.2591	2591	male	KO	Male	19.5714	CNIH3 x B6	533.4	8.6	38227658	38117783	99.71	34840210	91.14	3277573	8.57
sample.2590	2590	male	KO	Male	18.2857	CNIH3 x B6	709.8	8.7	31386893	31277587	99.65	27872071	88.8	3405516	10.85
sample.2589	2589	male	KO	Male	18.2857	CNIH3 x B6	558.6	8.5	37236255	37131007	99.71	33771194	90.69	3359813	9.02
sample.2129	2129	male	KO	Male	18.2857	CNIH3 x B6	417.9	8	34712964	34611115	99.71	31592765	91.01	3018350	8.7
sample.2128	2128	male	KO	Male	18.2857	CNIH3 x B6	287.7	8	27257645	27166443	99.66	24417972	89.58	2748471	10.08
sample.2052	2052	male	WT	Male	18.2857	CNIH3 x B6	470.4	8.3	33465898	33374912	99.73	30396256	90.83	2978656	8.9
sample.2018	2018	male	WT	Male	20.2857	CNIH3 x B6	325.5	8.2	36598125	36494137	99.72	33024728	90.24	3469409	9.48
sample.2016	2016	male	KO	Male	20.2857	CNIH3 x B6	466.2	8.5	40611585	40494917	99.71	36950094	90.98	3544823	8.73
sample.2015	2015	male	WT	Male	20.2857	CNIH3 x B6	298.2	8.4	27784344	27668669	99.58	24648122	88.71	3020547	10.87
sample.1950	1950	male	KO	Male	23.7143	CNIH3 x B6	436.8	8.6	38104836	37993925	99.71	34569328	90.72	3424597	8.99
sample.1949	1949	male	WT	Male	23.7143	CNIH3 x B6	453.6	8.7	36076858	35962666	99.68	32841773	91.03	3120893	8.65
sample.645	645	D	KO	Female	11	CNIH3 x B6	483	8.8	33483805	33377523	99.69	30355011	90.66	3022512	9.03
sample.644	644	D	KO	Female	10.8571	CNIH3 x B6	537.6	8.6	33714882	33606396	99.68	30288762	89.84	3317634	9.84
sample.643	643	D	KO	Female	11	CNIH3 x B6	508.2	8.3	36602601	36487671	99.69	33234956	90.8	3252715	8.89
sample.569	569	D	WT	Female	11.7143	CNIH3 x B6	504	8.6	38433486	38292132	99.63	34463371	89.67	3828761	9.96
sample.549	549	D	WT	Female	12.2857	CNIH3 x B6	390.6	8.9	37488661	37364988	99.67	33576096	89.56	3788892	10.11
sample.548	548	D	WT	Female	12.2857	CNIH3 x B6	537.6	8.9	34896841	34778003	99.66	31418061	90.03	3359942	9.63
sample.532	532	D	KO	Female	13.8571	CNIH3 x B6	420	8.9	36417137	36295684	99.67	32823167	90.13	3472517	9.54
