# Supplementary material for: Cnih3 Deletion Dysregulates Dorsal Hippocampal Transcription across the Estrous Cycle
Source: eNeuro. 2023 Mar 13;10(3):ENEURO.0153-22.2023. doi: 10.1523/ENEURO.0153-22.2023 (PMC10027183; doi:10.1523/ENEURO.0153-22.2023)
Supplement: Extended Data Table 2-1 — Wild-type differential expression contrast results. Sheets A–K are named according to the contrast performed and cover all genes analyzed as described in Materials and Methods. Highlighted rows signify genes we called significant (i.e., FDR < 0.05 with no logFC cutoff). Download Table 2-1, XLS file. [file enu-eN-NWR-0153-22-s13.xls]

## Sheet: Ext Table Key
Each sheet is named for the pairwise comparison performed. Abbreviations are as follows: WT = wild-type Met=metestrus Pro = proestrus Est = estrous Di = diestrus The sign convention for folld changes in all sheets of this table is the fold change between the gene's expression in first condition named in the sheet title relative to the second named condition. For example, genes with a positive log…

## Sheet: 2a-All WT Female vs WT Male
ensembl_gene_id	external_gene_name	gene_biotype	external_gene_source	transcript_count	description	logFC	AveExpr	t	P.Value	adj.P.Val	B
ENSMUSG00000069045	Ddx3y	protein_coding	MGI Symbol	4	DEAD (Asp-Glu-Ala-Asp) box polypeptide 3, Y-linked [Source:MGI Symbol;Acc:MGI:1349406]	-10.7746	-2.22213	-40.6462	1.02256e-41	8.26641e-38	52.384
ENSMUSG00000069049	Eif2s3y	protein_coding	MGI Symbol	6	eukaryotic translation initiation factor 2, subunit 3, structural gene Y-linked [Source:MGI Symbol;Acc:MGI:1349430]	-10.6892	-2.96645	-38.6151	1.42909e-40	7.70186e-37	51.1776
ENSMUSG00000056673	Kdm5d	protein_coding	MGI Symbol	9	lysine (K)-specific demethylase 5D [Source:MGI Symbol;Acc:MGI:99780]	-9.62812	-4.22615	-41.4383	3.78025e-42	6.11191e-38	50.5496
ENSMUSG00000068457	Uty	protein_coding	MGI Symbol	12	ubiquitously transcribed tetratricopeptide repeat gene, Y chromosome [Source:MGI Symbol;Acc:MGI:894810]	-7.74957	-2.74166	-28.6713	5.19721e-34	2.10071e-30	45.6261
ENSMUSG00000086503	Xist	lincRNA	MGI Symbol	2	inactive X specific transcripts [Source:MGI Symbol;Acc:MGI:98974]	4.54202	0.562233	6.55683	2.2999e-08	7.43696e-05	5.41227
ENSMUSG00000087174	5530601H04Rik	processed_transcript	MGI Symbol	16	RIKEN cDNA 5530601H04 gene [Source:MGI Symbol;Acc:MGI:1918695]	0.364688	4.95513	4.80383	1.31264e-05	0.0353713	2.8803
ENSMUSG00000037369	Kdm6a	protein_coding	MGI Symbol	10	lysine (K)-specific demethylase 6A [Source:MGI Symbol;Acc:MGI:1095419]	0.487304	4.42784	4.5701	2.94094e-05	0.0679273	2.17901
ENSMUSG00000079179	Rab10os	antisense	MGI Symbol	7	RAB10, member RAS oncogene family, opposite strand [Source:MGI Symbol;Acc:MGI:1921423]	0.372365	5.33693	4.25069	8.64515e-05	0.174718	1.04534
ENSMUSG00000097571	Jpx	lincRNA	MGI Symbol	11	Jpx transcript, Xist activator (non-protein coding) [Source:MGI Symbol;Acc:MGI:2180008]	0.373515	3.52378	4.05997	0.00016211	0.2621	0.65334
ENSMUSG00000000787	Ddx3x	protein_coding	MGI Symbol	5	DEAD/H (Asp-Glu-Ala-Asp/His) box polypeptide 3, X-linked [Source:MGI Symbol;Acc:MGI:103064]	0.29046	7.65043	4.12201	0.000132301	0.237672	0.508713
ENSMUSG00000035150	Eif2s3x	protein_coding	MGI Symbol	3	eukaryotic translation initiation factor 2, subunit 3, structural gene X-linked [Source:MGI Symbol;Acc:MGI:1349431]	0.603736	5.44432	3.95515	0.000227797	0.334821	0.125344
ENSMUSG00000023882	Zfp54	protein_coding	MGI Symbol	3	zinc finger protein 54 [Source:MGI Symbol;Acc:MGI:99201]	1.135	0.230111	3.31329	0.00166387	0.999227	-1.25851
ENSMUSG00000026432	Avpr1b	protein_coding	MGI Symbol	2	arginine vasopressin receptor 1B [Source:MGI Symbol;Acc:MGI:1347010]	2.13025	-0.428414	3.45946	0.00107451	0.999227	-1.27414
ENSMUSG00000000120	Ngfr	protein_coding	MGI Symbol	1	nerve growth factor receptor (TNFR superfamily, member 16) [Source:MGI Symbol;Acc:MGI:97323]	-0.996107	-0.129755	-3.26572	0.00191422	0.999227	-1.33702
ENSMUSG00000043013	Onecut1	protein_coding	MGI Symbol	2	one cut domain, family member 1 [Source:MGI Symbol;Acc:MGI:1196423]	-0.809269	-0.173658	-3.25548	0.00197256	0.999227	-1.36127
ENSMUSG00000020758	Itgb4	protein_coding	MGI Symbol	10	integrin beta 4 [Source:MGI Symbol;Acc:MGI:96613]	-0.578971	2.66625	-3.34896	0.00149683	0.999227	-1.36648
ENSMUSG00000030051	Aplf	protein_coding	MGI Symbol	4	aprataxin and PNKP like factor [Source:MGI Symbol;Acc:MGI:1919353]	-0.338737	2.22112	-3.24714	0.00202134	0.999227	-1.56015
ENSMUSG00000116895	Gm3435	protein_coding	MGI Symbol	2	predicted gene 3435 [Source:MGI Symbol;Acc:MGI:3810125]	-0.743964	0.829505	-3.09741	0.00311541	0.999227	-1.79355
ENSMUSG00000025491	Ifitm1	protein_coding	MGI Symbol	3	interferon induced transmembrane protein 1 [Source:MGI Symbol;Acc:MGI:1915963]	-1.01298	0.57669	-3.08763	0.00320345	0.999227	-1.81197
ENSMUSG00000048489	Depp1	protein_coding	MGI Symbol	3	DEPP1 autophagy regulator [Source:MGI Symbol;Acc:MGI:1918730]	2.26565	0.121625	3.07134	0.00335531	0.999227	-1.92135
ENSMUSG00000097023	Mir9-3hg	lincRNA	MGI Symbol	7	Mir9-3 host gene [Source:MGI Symbol;Acc:MGI:2142071]	-0.362473	4.05918	-3.20816	0.00226471	0.999227	-1.93746
ENSMUSG00000028873	Cdca8	protein_coding	MGI Symbol	6	cell division cycle associated 8 [Source:MGI Symbol;Acc:MGI:1196274]	0.6903	1.63008	3.03013	0.00377	0.999227	-1.94605
ENSMUSG00000028965	Tnfrsf9	protein_coding	MGI Symbol	9	tumor necrosis factor receptor superfamily, member 9 [Source:MGI Symbol;Acc:MGI:1101059]	0.668603	1.77592	3.03946	0.00367213	0.999227	-1.94853
ENSMUSG00000027568	Ntsr1	protein_coding	MGI Symbol	2	neurotensin receptor 1 [Source:MGI Symbol;Acc:MGI:97386]	-0.682328	0.597735	-3.02063	0.0038721	0.999227	-1.98232
ENSMUSG00000095041	AC149090.1	protein_coding	Clone-based (Ensembl) gene	2		0.472401	6.75919	3.2384	0.00207364	0.999227	-2.06224
ENSMUSG00000001870	Ltbp1	protein_coding	MGI Symbol	10	latent transforming growth factor beta binding protein 1 [Source:MGI Symbol;Acc:MGI:109151]	-0.596557	1.1537	-2.98941	0.00422642	0.999227	-2.09471
ENSMUSG00000006342	Susd2	protein_coding	MGI Symbol	4	sushi domain containing 2 [Source:MGI Symbol;Acc:MGI:1918983]	-0.852227	0.135983	-2.95002	0.00471644	0.999227	-2.0997
ENSMUSG00000029863	Casp2	protein_coding	MGI Symbol	10	caspase 2 [Source:MGI Symbol;Acc:MGI:97295]	0.362983	3.16099	3.05939	0.00347089	0.999227	-2.12161
ENSMUSG00000020327	Fgf22	protein_coding	MGI Symbol	3	fibroblast growth factor 22 [Source:MGI Symbol;Acc:MGI:1914362]	-0.646277	0.873722	-2.96943	0.00446869	0.999227	-2.12554
ENSMUSG00000020680	Taf15	protein_coding	MGI Symbol	5	TATA-box binding protein associated factor 15 [Source:MGI Symbol;Acc:MGI:1917689]	0.445079	2.65681	3.00221	0.00407766	0.999227	-2.18596
ENSMUSG00000097451	Rian	processed_transcript	MGI Symbol	69	RNA imprinted and accumulated in nucleus [Source:MGI Symbol;Acc:MGI:1922995]	0.351022	7.03146	3.18405	0.00242882	0.999227	-2.22054
ENSMUSG00000102758	Naaladl2	protein_coding	MGI Symbol	4	N-acetylated alpha-linked acidic dipeptidase-like 2 [Source:MGI Symbol;Acc:MGI:2685867]	-0.836463	-0.0995666	-2.8917	0.00553992	0.999227	-2.2285
ENSMUSG00000044626	Liph	protein_coding	MGI Symbol	6	lipase, member H [Source:MGI Symbol;Acc:MGI:2388029]	0.989684	-0.209479	2.86225	0.00600475	0.999227	-2.28692
ENSMUSG00000019945	Cabcoco1	protein_coding	MGI Symbol	2	ciliary associated calcium binding coiled-coil 1 [Source:MGI Symbol;Acc:MGI:1920537]	-0.483526	2.09286	-2.93941	0.00485724	0.999227	-2.32715
ENSMUSG00000110631	Gm42047	lincRNA	MGI Symbol	2	predicted gene, 42047 [Source:MGI Symbol;Acc:MGI:5624932]	-1.04428	-0.426312	-2.83771	0.00641935	0.999227	-2.32867
ENSMUSG00000082396	Zfp389	transcribed_processed_pseudogene	MGI Symbol	2	zinc finger protein 389 [Source:MGI Symbol;Acc:MGI:3641940]	1.05894	-0.391094	2.83407	0.00648306	0.999227	-2.35374
ENSMUSG00000079297	Gm2223	processed_pseudogene	MGI Symbol	1	predicted pseudogene 2223 [Source:MGI Symbol;Acc:MGI:3780393]	0.955861	0.572458	2.76936	0.00771767	0.999227	-2.47566
ENSMUSG00000023272	Creld2	protein_coding	MGI Symbol	1	cysteine-rich with EGF-like domains 2 [Source:MGI Symbol;Acc:MGI:1923987]	-0.566532	3.19752	-2.93924	0.00485958	0.999227	-2.53305
ENSMUSG00000036928	Stag3	protein_coding	MGI Symbol	9	stromal antigen 3 [Source:MGI Symbol;Acc:MGI:1355311]	-0.702898	-0.310442	-2.73096	0.00854931	0.999227	-2.56782
ENSMUSG00000063849	Ppcdc	protein_coding	MGI Symbol	14	phosphopantothenoylcysteine decarboxylase [Source:MGI Symbol;Acc:MGI:1914062]	0.285038	4.3161	2.94156	0.00482845	0.999227	-2.60344
ENSMUSG00000039683	Sdk1	protein_coding	MGI Symbol	4	sidekick cell adhesion molecule 1 [Source:MGI Symbol;Acc:MGI:2444413]	-0.816274	0.223873	-2.73178	0.0085306	0.999227	-2.60521
ENSMUSG00000048218	Amigo2	protein_coding	MGI Symbol	2	adhesion molecule with Ig like domain 2 [Source:MGI Symbol;Acc:MGI:2145995]	-0.46706	3.83901	-2.92422	0.0050656	0.999227	-2.64142
ENSMUSG00000022894	Adamts5	protein_coding	MGI Symbol	1	a disintegrin-like and metallopeptidase (reprolysin type) with thrombospondin type 1 motif, 5 (aggrecanase-2) [Source:MGI Symbol;Acc:MGI:1346321]	-0.836223	-0.266341	-2.68442	0.00966727	0.999227	-2.69082
ENSMUSG00000034402	Kcnh5	protein_coding	MGI Symbol	1	potassium voltage-gated channel, subfamily H (eag-related), member 5 [Source:MGI Symbol;Acc:MGI:3584508]	-0.713659	0.669349	-2.70562	0.0091424	0.999227	-2.72632
ENSMUSG00000032204	Aqp9	protein_coding	MGI Symbol	10	aquaporin 9 [Source:MGI Symbol;Acc:MGI:1891066]	-0.885713	-0.528454	-2.65043	0.010567	0.999227	-2.73286
ENSMUSG00000032089	Il10ra	protein_coding	MGI Symbol	3	interleukin 10 receptor, alpha [Source:MGI Symbol;Acc:MGI:96538]	0.650083	1.36074	2.6705	0.0100269	0.999227	-2.75583
ENSMUSG00000071796	6820431F20Rik	transcribed_unprocessed_pseudogene	MGI Symbol	2	RIKEN cDNA 6820431F20 gene [Source:MGI Symbol;Acc:MGI:3694236]	-0.494985	1.94304	-2.73437	0.00847227	0.999227	-2.79419
ENSMUSG00000002409	Dyrk1b	protein_coding	MGI Symbol	3	dual-specificity tyrosine-(Y)-phosphorylation regulated kinase 1b [Source:MGI Symbol;Acc:MGI:1330302]	-0.633503	2.70727	-2.79323	0.00723888	0.999227	-2.81254
ENSMUSG00000049598	Vsig8	protein_coding	MGI Symbol	2	V-set and immunoglobulin domain containing 8 [Source:MGI Symbol;Acc:MGI:3642995]	-0.477378	1.00159	-2.66073	0.0102866	0.999227	-2.83194
ENSMUSG00000024818	Slc25a45	protein_coding	MGI Symbol	7	solute carrier family 25, member 45 [Source:MGI Symbol;Acc:MGI:2147731]	0.632825	1.81231	2.66522	0.0101665	0.999227	-2.83781
ENSMUSG00000046318	Ccbe1	protein_coding	MGI Symbol	7	collagen and calcium binding EGF domains 1 [Source:MGI Symbol;Acc:MGI:2445053]	-0.340689	3.45311	-2.81351	0.00685394	0.999227	-2.83985
ENSMUSG00000104017	Gm37363	TEC	MGI Symbol	1	predicted gene, 37363 [Source:MGI Symbol;Acc:MGI:5610591]	1.97138	-0.225893	2.59581	0.0121741	0.999227	-2.85208
ENSMUSG00000024914	Drap1	protein_coding	MGI Symbol	10	Dr1 associated protein 1 (negative cofactor 2 alpha) [Source:MGI Symbol;Acc:MGI:1913806]	-0.271074	6.35907	-2.93563	0.00490829	0.999227	-2.86431
ENSMUSG00000054723	Vmac	protein_coding	MGI Symbol	4	vimentin-type intermediate filament associated coiled-coil protein [Source:MGI Symbol;Acc:MGI:2146912]	-0.316502	3.38301	-2.79943	0.0071192	0.999227	-2.87824
ENSMUSG00000112627	4933412E12Rik	bidirectional_promoter_lncRNA	MGI Symbol	3	RIKEN cDNA 4933412E12 gene [Source:MGI Symbol;Acc:MGI:1918336]	0.340459	3.62459	2.76749	0.00775627	0.999227	-2.91932
ENSMUSG00000085894	Gm15832	processed_transcript	MGI Symbol	1	predicted gene 15832 [Source:MGI Symbol;Acc:MGI:3834078]	1.02106	-0.411095	2.54389	0.0139049	0.999227	-2.92367
ENSMUSG00000023328	Ache	protein_coding	MGI Symbol	9	acetylcholinesterase [Source:MGI Symbol;Acc:MGI:87876]	-0.4187	4.3888	-2.83527	0.00646186	0.999227	-2.93218
ENSMUSG00000031226	Pbdc1	protein_coding	MGI Symbol	3	polysaccharide biosynthesis domain containing 1 [Source:MGI Symbol;Acc:MGI:1914933]	0.259445	5.49809	2.87132	0.00585785	0.999227	-2.93902
ENSMUSG00000021798	Ldb3	protein_coding	MGI Symbol	8	LIM domain binding 3 [Source:MGI Symbol;Acc:MGI:1344412]	0.306554	3.58815	2.7504	0.00811844	0.999227	-2.94505
ENSMUSG00000041235	Chd7	protein_coding	MGI Symbol	8	chromodomain helicase DNA binding protein 7 [Source:MGI Symbol;Acc:MGI:2444748]	-0.300623	3.90479	-2.78769	0.00734756	0.999227	-2.98646
ENSMUSG00000015568	Lpl	protein_coding	MGI Symbol	5	lipoprotein lipase [Source:MGI Symbol;Acc:MGI:96820]	-0.40023	5.62049	-2.86204	0.00600815	0.999227	-3.00686
ENSMUSG00000032014	Oaf	protein_coding	MGI Symbol	3	out at first homolog [Source:MGI Symbol;Acc:MGI:94852]	-0.475536	2.04325	-2.64996	0.01058	0.999227	-3.0141
ENSMUSG00000017667	Zfp334	protein_coding	MGI Symbol	1	zinc finger protein 334 [Source:MGI Symbol;Acc:MGI:2388656]	0.246507	4.82544	2.80581	0.00699787	0.999227	-3.01864
ENSMUSG00000110373	Gm42303	antisense	MGI Symbol	1	predicted gene, 42303 [Source:MGI Symbol;Acc:MGI:5625188]	-0.580406	0.863722	-2.56158	0.0132917	0.999227	-3.03218
ENSMUSG00000087184	Gm11650	processed_transcript	MGI Symbol	1	predicted gene 11650 [Source:MGI Symbol;Acc:MGI:3650132]	-0.913189	-0.63747	-2.49185	0.0158615	0.999227	-3.04537
ENSMUSG00000026097	Ormdl1	protein_coding	MGI Symbol	2	ORM1-like 1 (S. cerevisiae) [Source:MGI Symbol;Acc:MGI:2181669]	0.323093	2.84983	2.65621	0.0104089	0.999227	-3.0521
ENSMUSG00000030826	Bcat2	protein_coding	MGI Symbol	8	branched chain aminotransferase 2, mitochondrial [Source:MGI Symbol;Acc:MGI:1276534]	0.293902	4.04993	2.72787	0.00861956	0.999227	-3.0799
ENSMUSG00000031503	Col4a2	protein_coding	MGI Symbol	3	collagen, type IV, alpha 2 [Source:MGI Symbol;Acc:MGI:88455]	-0.518857	2.03438	-2.62183	0.0113826	0.999227	-3.09082
ENSMUSG00000027709	Mccc1	protein_coding	MGI Symbol	8	methylcrotonoyl-Coenzyme A carboxylase 1 (alpha) [Source:MGI Symbol;Acc:MGI:1919289]	0.27488	4.20422	2.73294	0.00850439	0.999227	-3.10029
ENSMUSG00000026977	Marchf7	protein_coding	MGI Symbol	9	membrane associated ring-CH-type finger 7 [Source:MGI Symbol;Acc:MGI:1931053]	-0.201538	5.94568	-2.83244	0.00651172	0.999227	-3.10131
ENSMUSG00000050295	Foxc1	protein_coding	MGI Symbol	1	forkhead box C1 [Source:MGI Symbol;Acc:MGI:1347466]	-0.842812	0.503839	-2.51365	0.0150135	0.999227	-3.11562
ENSMUSG00000026765	Lypd6b	protein_coding	MGI Symbol	3	LY6/PLAUR domain containing 6B [Source:MGI Symbol;Acc:MGI:1919147]	-0.36095	2.18675	-2.61651	0.0115404	0.999227	-3.12962
ENSMUSG00000036459	Wtip	protein_coding	MGI Symbol	4	WT1-interacting protein [Source:MGI Symbol;Acc:MGI:2141920]	-0.672715	0.293101	-2.49507	0.0157334	0.999227	-3.13109
ENSMUSG00000039942	Ptger4	protein_coding	MGI Symbol	3	prostaglandin E receptor 4 (subtype EP4) [Source:MGI Symbol;Acc:MGI:104311]	-0.651193	0.196129	-2.48295	0.0162198	0.999227	-3.13453
ENSMUSG00000069539	Scyl2	protein_coding	MGI Symbol	7	SCY1-like 2 (S. cerevisiae) [Source:MGI Symbol;Acc:MGI:1289172]	-0.286047	3.00922	-2.6459	0.0106924	0.999227	-3.16353
ENSMUSG00000053965	Pde5a	protein_coding	MGI Symbol	4	phosphodiesterase 5A, cGMP-specific [Source:MGI Symbol;Acc:MGI:2651499]	-0.419642	2.31023	-2.60216	0.0119763	0.999227	-3.17033
ENSMUSG00000041471	Shld2	protein_coding	MGI Symbol	7	shieldin complex subunit 2 [Source:MGI Symbol;Acc:MGI:1922948]	-0.48884	1.55598	-2.53588	0.0141911	0.999227	-3.19308
ENSMUSG00000113450	Gm49359	protein_coding	MGI Symbol	3	predicted gene, 49359 [Source:MGI Symbol;Acc:MGI:6121568]	0.437719	1.89284	2.51595	0.0149262	0.999227	-3.20649
ENSMUSG00000020059	Sycp3	protein_coding	MGI Symbol	3	synaptonemal complex protein 3 [Source:MGI Symbol;Acc:MGI:109542]	-0.872374	-0.34978	-2.40771	0.0195555	0.999227	-3.21195
ENSMUSG00000047875	Gpr157	protein_coding	MGI Symbol	1	G protein-coupled receptor 157 [Source:MGI Symbol;Acc:MGI:2442046]	-0.922384	-0.639736	-2.39914	0.0199721	0.999227	-3.22529
ENSMUSG00000110924	Gm40518	lincRNA	MGI Symbol	2	predicted gene, 40518 [Source:MGI Symbol;Acc:MGI:5623403]	1.68148	-0.586005	2.38281	0.020788	0.999227	-3.22723
ENSMUSG00000004562	Arhgef40	protein_coding	MGI Symbol	26	Rho guanine nucleotide exchange factor (GEF) 40 [Source:MGI Symbol;Acc:MGI:2685515]	-0.313613	3.21281	-2.6388	0.010892	0.999227	-3.23345
ENSMUSG00000027353	Mcm8	protein_coding	MGI Symbol	3	minichromosome maintenance 8 homologous recombination repair factor [Source:MGI Symbol;Acc:MGI:1913884]	-0.322432	2.56744	-2.5783	0.0127346	0.999227	-3.27105
ENSMUSG00000021758	Ddx4	protein_coding	MGI Symbol	2	DEAD (Asp-Glu-Ala-Asp) box polypeptide 4 [Source:MGI Symbol;Acc:MGI:102670]	-0.852695	0.519996	-2.42027	0.0189587	0.999227	-3.30478
ENSMUSG00000079110	Capn3	protein_coding	MGI Symbol	14	calpain 3 [Source:MGI Symbol;Acc:MGI:107437]	0.581169	0.0379696	2.3466	0.0227047	0.999227	-3.31862
ENSMUSG00000031549	Ido2	protein_coding	MGI Symbol	4	indoleamine 2,3-dioxygenase 2 [Source:MGI Symbol;Acc:MGI:2142489]	0.461524	1.73467	2.44872	0.017668	0.999227	-3.3315
ENSMUSG00000081967	Gm14017	processed_pseudogene	MGI Symbol	1	predicted gene 14017 [Source:MGI Symbol;Acc:MGI:3702155]	0.556456	0.988514	2.38044	0.0209089	0.999227	-3.34152
ENSMUSG00000045176	Borcs6	protein_coding	MGI Symbol	1	BLOC-1 related complex subunit 6 [Source:MGI Symbol;Acc:MGI:1919173]	-0.314167	3.73404	-2.62861	0.0111842	0.999227	-3.34324
ENSMUSG00000020080	Hkdc1	protein_coding	MGI Symbol	4	hexokinase domain containing 1 [Source:MGI Symbol;Acc:MGI:2384910]	0.557363	2.13392	2.45454	0.0174138	0.999227	-3.35331
ENSMUSG00000028865	Cd164l2	protein_coding	MGI Symbol	6	CD164 sialomucin-like 2 [Source:MGI Symbol;Acc:MGI:1916905]	0.509828	2.30489	2.46236	0.0170775	0.999227	-3.35446
ENSMUSG00000032803	Cdv3	protein_coding	MGI Symbol	7	carnitine deficiency-associated gene expressed in ventricle 3 [Source:MGI Symbol;Acc:MGI:2448759]	0.428563	6.82274	2.73562	0.00844415	0.999227	-3.35595
ENSMUSG00000072473	1700024G13Rik	protein_coding	MGI Symbol	1	RIKEN cDNA 1700024G13 gene [Source:MGI Symbol;Acc:MGI:1914335]	-1.05493	-0.752871	-2.32311	0.0240309	0.999227	-3.36035
ENSMUSG00000046207	Pik3r6	protein_coding	MGI Symbol	5	phosphoinositide-3-kinase regulatory subunit 5 [Source:MGI Symbol;Acc:MGI:2144613]	0.772467	0.269763	2.32056	0.0241791	0.999227	-3.36454
ENSMUSG00000015647	Lama5	protein_coding	MGI Symbol	4	laminin, alpha 5 [Source:MGI Symbol;Acc:MGI:105382]	-0.677026	0.140218	-2.36444	0.0217416	0.999227	-3.37686
ENSMUSG00000040420	Cdh18	protein_coding	MGI Symbol	7	cadherin 18 [Source:MGI Symbol;Acc:MGI:1344366]	0.897963	-0.0793494	2.29912	0.0254566	0.999227	-3.37748
ENSMUSG00000023991	Foxp4	protein_coding	MGI Symbol	8	forkhead box P4 [Source:MGI Symbol;Acc:MGI:1921373]	-0.359728	3.81743	-2.62094	0.011409	0.999227	-3.38258
ENSMUSG00000015659	Serac1	protein_coding	MGI Symbol	5	serine active site containing 1 [Source:MGI Symbol;Acc:MGI:2447813]	0.526825	2.41359	2.45699	0.0173079	0.999227	-3.38645
ENSMUSG00000025209	Twnk	protein_coding	MGI Symbol	2	twinkle mtDNA helicase [Source:MGI Symbol;Acc:MGI:2137410]	0.299842	3.76396	2.57549	0.0128268	0.999227	-3.39426
ENSMUSG00000033752	Mnd1	protein_coding	MGI Symbol	1	meiotic nuclear divisions 1 [Source:MGI Symbol;Acc:MGI:1924165]	0.556595	0.520892	2.31813	0.024321	0.999227	-3.39919
ENSMUSG00000056481	Cd248	protein_coding	MGI Symbol	1	CD248 antigen, endosialin [Source:MGI Symbol;Acc:MGI:1917695]	-0.759979	-0.373524	-2.31913	0.0242623	0.999227	-3.40835
ENSMUSG00000029735	Tpk1	protein_coding	MGI Symbol	6	thiamine pyrophosphokinase [Source:MGI Symbol;Acc:MGI:1352500]	0.615646	1.41601	2.36069	0.0219405	0.999227	-3.41499
ENSMUSG00000034800	Zfp661	protein_coding	MGI Symbol	4	zinc finger protein 661 [Source:MGI Symbol;Acc:MGI:1919430]	0.321079	3.38056	2.52329	0.0146515	0.999227	-3.44062
ENSMUSG00000057816	Cfap299	protein_coding	MGI Symbol	4	cilia and flagella associated protein 299 [Source:MGI Symbol;Acc:MGI:1916571]	0.850254	0.251405	2.26155	0.0278405	0.999227	-3.46454
ENSMUSG00000038844	Kif16b	protein_coding	MGI Symbol	5	kinesin family member 16B [Source:MGI Symbol;Acc:MGI:1098240]	-0.312485	2.89756	-2.50347	0.0154042	0.999227	-3.46822
ENSMUSG00000003348	Mob3a	protein_coding	MGI Symbol	4	MOB kinase activator 3A [Source:MGI Symbol;Acc:MGI:3050117]	0.326486	3.32132	2.50247	0.0154431	0.999227	-3.46887
ENSMUSG00000021222	Dcaf4	protein_coding	MGI Symbol	8	DDB1 and CUL4 associated factor 4 [Source:MGI Symbol;Acc:MGI:1921078]	0.231639	5.21834	2.63639	0.0109603	0.999227	-3.47475
ENSMUSG00000067369	Trmt2b	protein_coding	MGI Symbol	5	TRM2 tRNA methyltransferase 2B [Source:MGI Symbol;Acc:MGI:2442530]	0.311883	3.2227	2.49696	0.0156587	0.999227	-3.48312
ENSMUSG00000086212	Mkln1os	lincRNA	MGI Symbol	3	muskelin 1, intracellular mediator containing kelch motifs, opposite strand [Source:MGI Symbol;Acc:MGI:3651306]	0.357754	2.60504	2.44356	0.017896	0.999227	-3.48666
ENSMUSG00000091735	Gpr62	protein_coding	MGI Symbol	1	G protein-coupled receptor 62 [Source:MGI Symbol;Acc:MGI:3525078]	-0.535054	1.03891	-2.35915	0.0220234	0.999227	-3.49229
ENSMUSG00000097640	Gm20033	processed_transcript	MGI Symbol	6	predicted gene, 20033 [Source:MGI Symbol;Acc:MGI:5012218]	-0.576305	0.796309	-2.33177	0.023534	0.999227	-3.5002
ENSMUSG00000047945	Marcksl1	protein_coding	MGI Symbol	1	MARCKS-like 1 [Source:MGI Symbol;Acc:MGI:97143]	-0.451653	5.07029	-2.64614	0.0106857	0.999227	-3.50267
ENSMUSG00000087298	Gm9392	processed_pseudogene	MGI Symbol	1	predicted pseudogene 9392 [Source:MGI Symbol;Acc:MGI:3643262]	-0.431728	0.546363	-2.31094	0.024745	0.999227	-3.50493
ENSMUSG00000020473	Aebp1	protein_coding	MGI Symbol	3	AE binding protein 1 [Source:MGI Symbol;Acc:MGI:1197012]	-0.721382	1.75475	-2.41593	0.0191629	0.999227	-3.50571
ENSMUSG00000053740	Gm6457	processed_pseudogene	MGI Symbol	1	predicted pseudogene 6457 [Source:MGI Symbol;Acc:MGI:3648519]	0.487103	1.01475	2.30048	0.0253739	0.999227	-3.50954
ENSMUSG00000029307	Dmp1	protein_coding	MGI Symbol	1	dentin matrix protein 1 [Source:MGI Symbol;Acc:MGI:94910]	0.578985	1.17237	2.30102	0.025341	0.999227	-3.51287
ENSMUSG00000038264	Sema7a	protein_coding	MGI Symbol	2	sema domain, immunoglobulin domain (Ig), and GPI membrane anchor, (semaphorin) 7A [Source:MGI Symbol;Acc:MGI:1306826]	-0.340088	3.82737	-2.55719	0.0134415	0.999227	-3.52088
ENSMUSG00000097180	2700038G22Rik	lincRNA	MGI Symbol	2	RIKEN cDNA 2700038G22 gene [Source:MGI Symbol;Acc:MGI:1914444]	0.556307	1.06185	2.28881	0.0260918	0.999227	-3.52107
ENSMUSG00000030022	Adamts9	protein_coding	MGI Symbol	6	a disintegrin-like and metallopeptidase (reprolysin type) with thrombospondin type 1 motif, 9 [Source:MGI Symbol;Acc:MGI:1916320]	-0.502647	1.24774	-2.35219	0.0223987	0.999227	-3.5216
ENSMUSG00000034532	Fbxo16	protein_coding	MGI Symbol	4	F-box protein 16 [Source:MGI Symbol;Acc:MGI:1354706]	0.296964	3.49759	2.49096	0.0158968	0.999227	-3.53054
ENSMUSG00000029524	Sirt4	protein_coding	MGI Symbol	6	sirtuin 4 [Source:MGI Symbol;Acc:MGI:1922637]	0.204464	3.93873	2.52325	0.014653	0.999227	-3.54397
ENSMUSG00000016503	Gtf3a	protein_coding	MGI Symbol	4	general transcription factor III A [Source:MGI Symbol;Acc:MGI:1913846]	-0.644537	1.4236	-2.38035	0.0209134	0.999227	-3.54807
ENSMUSG00000020472	Zkscan17	protein_coding	MGI Symbol	6	zinc finger with KRAB and SCAN domains 17 [Source:MGI Symbol;Acc:MGI:2679270]	-0.314839	2.80331	-2.47389	0.0165922	0.999227	-3.55007
ENSMUSG00000028587	Orc1	protein_coding	MGI Symbol	5	origin recognition complex, subunit 1 [Source:MGI Symbol;Acc:MGI:1328337]	0.620629	-0.25579	2.20264	0.0319775	0.999227	-3.55069
ENSMUSG00000018604	Tbx3	protein_coding	MGI Symbol	6	T-box 3 [Source:MGI Symbol;Acc:MGI:98495]	-0.755564	-0.481906	-2.24613	0.028875	0.999227	-3.55292
ENSMUSG00000035722	Abca7	protein_coding	MGI Symbol	3	ATP-binding cassette, sub-family A (ABC1), member 7 [Source:MGI Symbol;Acc:MGI:1351646]	-0.444686	1.77687	-2.38482	0.0206858	0.999227	-3.56444
ENSMUSG00000041734	Kirrel	protein_coding	MGI Symbol	3	kirre like nephrin family adhesion molecule 1 [Source:MGI Symbol;Acc:MGI:1891396]	-0.780474	-0.476437	-2.21955	0.0307382	0.999227	-3.56941
ENSMUSG00000036111	Lmo1	protein_coding	MGI Symbol	3	LIM domain only 1 [Source:MGI Symbol;Acc:MGI:102812]	-0.32318	4.73915	-2.59693	0.0121391	0.999227	-3.57312
ENSMUSG00000106212	Gm43112	sense_intronic	MGI Symbol	1	predicted gene 43112 [Source:MGI Symbol;Acc:MGI:5663249]	1.07551	0.160412	2.18615	0.033229	0.999227	-3.5753
ENSMUSG00000051735	Rinl	protein_coding	MGI Symbol	6	Ras and Rab interactor-like [Source:MGI Symbol;Acc:MGI:2444024]	0.448999	1.51088	2.28756	0.02617	0.999227	-3.60875
ENSMUSG00000115422	4930452G13Rik	lincRNA	MGI Symbol	2	RIKEN cDNA 4930452G13 gene [Source:MGI Symbol;Acc:MGI:1921239]	0.682032	0.28975	2.18591	0.0332474	0.999227	-3.61594
ENSMUSG00000026708	Cenpl	protein_coding	MGI Symbol	10	centromere protein L [Source:MGI Symbol;Acc:MGI:1917704]	0.42121	1.57459	2.27732	0.0268167	0.999227	-3.62259
ENSMUSG00000047259	Mc4r	protein_coding	MGI Symbol	1	melanocortin 4 receptor [Source:MGI Symbol;Acc:MGI:99457]	-0.37998	2.71726	-2.41624	0.0191486	0.999227	-3.63459
ENSMUSG00000066543	Rpl17-ps9	processed_pseudogene	MGI Symbol	1	ribosomal protein L17, pseudogene 9 [Source:MGI Symbol;Acc:MGI:3641818]	-0.40421	0.432397	-2.23823	0.0294178	0.999227	-3.63533
ENSMUSG00000020614	Fam20a	protein_coding	MGI Symbol	4	family with sequence similarity 20, member A [Source:MGI Symbol;Acc:MGI:2388266]	-0.333737	2.55874	-2.40388	0.0197406	0.999227	-3.64574
ENSMUSG00000038569	Rad9b	protein_coding	MGI Symbol	5	RAD9 checkpoint clamp component B [Source:MGI Symbol;Acc:MGI:2385231]	-0.458829	2.00689	-2.36564	0.0216777	0.999227	-3.64801
ENSMUSG00000104986	1600023N17Rik	TEC	MGI Symbol	1	RIKEN cDNA 1600023N17 gene [Source:MGI Symbol;Acc:MGI:1917038]	-0.482224	0.217241	-2.22766	0.0301586	0.999227	-3.65129
ENSMUSG00000086682	Gm16023	processed_transcript	MGI Symbol	2	predicted gene 16023 [Source:MGI Symbol;Acc:MGI:3802146]	-0.489021	0.19131	-2.21323	0.0311965	0.999227	-3.65186
ENSMUSG00000030671	Pde3b	protein_coding	MGI Symbol	4	phosphodiesterase 3B, cGMP-inhibited [Source:MGI Symbol;Acc:MGI:1333863]	0.362579	2.35862	2.34035	0.023051	0.999227	-3.6566
ENSMUSG00000010047	Hyal2	protein_coding	MGI Symbol	7	hyaluronoglucosaminidase 2 [Source:MGI Symbol;Acc:MGI:1196334]	-0.267189	3.49933	-2.45895	0.0172234	0.999227	-3.66774
ENSMUSG00000033453	Adamts15	protein_coding	MGI Symbol	3	a disintegrin-like and metallopeptidase (reprolysin type) with thrombospondin type 1 motif, 15 [Source:MGI Symbol;Acc:MGI:2449569]	0.798339	0.152264	2.13279	0.0375776	0.999227	-3.68191
ENSMUSG00000032113	Chek1	protein_coding	MGI Symbol	8	checkpoint kinase 1 [Source:MGI Symbol;Acc:MGI:1202065]	0.559582	0.603598	2.16288	0.0350678	0.999227	-3.70301
ENSMUSG00000043872	Zmym1	protein_coding	MGI Symbol	7	zinc finger, MYM domain containing 1 [Source:MGI Symbol;Acc:MGI:1915560]	0.34381	3.25252	2.39398	0.0202264	0.999227	-3.70812
ENSMUSG00000022610	Mapk12	protein_coding	MGI Symbol	7	mitogen-activated protein kinase 12 [Source:MGI Symbol;Acc:MGI:1353438]	-0.382932	2.22209	-2.34156	0.0229836	0.999227	-3.71008
ENSMUSG00000033458	Fan1	protein_coding	MGI Symbol	4	FANCD2/FANCI-associated nuclease 1 [Source:MGI Symbol;Acc:MGI:3045266]	0.740995	0.320108	2.13697	0.03722	0.999227	-3.71152
ENSMUSG00000052415	Tchh	protein_coding	MGI Symbol	1	trichohyalin [Source:MGI Symbol;Acc:MGI:2177944]	-0.375579	2.26809	-2.35852	0.022057	0.999227	-3.71172
ENSMUSG00000067028	Cntnap5b	protein_coding	MGI Symbol	3	contactin associated protein-like 5B [Source:MGI Symbol;Acc:MGI:3664583]	-0.419213	2.51524	-2.36754	0.0215779	0.999227	-3.71362
ENSMUSG00000043648	Pld6	protein_coding	MGI Symbol	2	phospholipase D family, member 6 [Source:MGI Symbol;Acc:MGI:2687283]	-0.81346	-0.449256	-2.14629	0.0364332	0.999227	-3.71497
ENSMUSG00000113835	Gm19554	lincRNA	MGI Symbol	1	predicted gene, 19554 [Source:MGI Symbol;Acc:MGI:5011739]	0.62228	0.730153	2.16111	0.0352114	0.999227	-3.72128
ENSMUSG00000001151	Pcnt	protein_coding	MGI Symbol	8	pericentrin (kendrin) [Source:MGI Symbol;Acc:MGI:102722]	-0.228813	4.18909	-2.48653	0.0160749	0.999227	-3.72728
ENSMUSG00000103713	Gm2136	TEC	MGI Symbol	1	predicted gene 2136 [Source:MGI Symbol;Acc:MGI:3780305]	-0.359554	1.25301	-2.24465	0.0289757	0.999227	-3.73469
ENSMUSG00000017493	Igfbp4	protein_coding	MGI Symbol	6	insulin-like growth factor binding protein 4 [Source:MGI Symbol;Acc:MGI:96439]	-0.263171	6.63381	-2.58298	0.0125824	0.999227	-3.73487
ENSMUSG00000036882	Arhgap33	protein_coding	MGI Symbol	8	Rho GTPase activating protein 33 [Source:MGI Symbol;Acc:MGI:2673998]	0.245713	5.32933	2.52253	0.0146798	0.999227	-3.73592
ENSMUSG00000001420	Tmem79	protein_coding	MGI Symbol	4	transmembrane protein 79 [Source:MGI Symbol;Acc:MGI:1919163]	-0.407557	0.879479	-2.22149	0.0305984	0.999227	-3.73624
ENSMUSG00000023170	Gps2	protein_coding	MGI Symbol	5	G protein pathway suppressor 2 [Source:MGI Symbol;Acc:MGI:1891751]	-0.223076	4.78891	-2.51469	0.0149739	0.999227	-3.74979
ENSMUSG00000081451	Gm12734	processed_pseudogene	MGI Symbol	1	predicted gene 12734 [Source:MGI Symbol;Acc:MGI:3650213]	-0.599873	-0.0965502	-2.13694	0.0372228	0.999227	-3.75098
ENSMUSG00000089844	A530032D15Rik	protein_coding	MGI Symbol	3	RIKEN cDNA A530032D15Rik gene [Source:MGI Symbol;Acc:MGI:3037746]	-0.446781	0.618573	-2.1877	0.0331097	0.999227	-3.75215
ENSMUSG00000001964	Emd	protein_coding	MGI Symbol	6	emerin [Source:MGI Symbol;Acc:MGI:108117]	0.475912	4.6772	2.46144	0.0171168	0.999227	-3.76714
ENSMUSG00000035342	Lzts2	protein_coding	MGI Symbol	8	leucine zipper, putative tumor suppressor 2 [Source:MGI Symbol;Acc:MGI:2385095]	-0.45178	2.53672	-2.3481	0.0226219	0.999227	-3.76731
ENSMUSG00000097223	Gm2449	bidirectional_promoter_lncRNA	MGI Symbol	2	predicted gene 2449 [Source:MGI Symbol;Acc:MGI:3780616]	-0.50114	-0.0196757	-2.12341	0.0383919	0.999227	-3.77253
ENSMUSG00000038060	Dlec1	protein_coding	MGI Symbol	8	deleted in lung and esophageal cancer 1 [Source:MGI Symbol;Acc:MGI:2443671]	0.973301	-0.448072	2.04569	0.0457485	0.999227	-3.77937
ENSMUSG00000022464	Slc38a4	protein_coding	MGI Symbol	5	solute carrier family 38, member 4 [Source:MGI Symbol;Acc:MGI:1916604]	-0.560087	-0.075286	-2.12509	0.0382448	0.999227	-3.78394
ENSMUSG00000030276	Ttll3	protein_coding	MGI Symbol	9	tubulin tyrosine ligase-like family, member 3 [Source:MGI Symbol;Acc:MGI:2141418]	0.342268	2.83133	2.31641	0.024422	0.999227	-3.78611
ENSMUSG00000018459	Slc13a3	protein_coding	MGI Symbol	5	solute carrier family 13 (sodium-dependent dicarboxylate transporter), member 3 [Source:MGI Symbol;Acc:MGI:2149635]	-0.545157	2.64469	-2.33976	0.0230842	0.999227	-3.78894
ENSMUSG00000085133	B930095G15Rik	sense_intronic	MGI Symbol	1	RIKEN cDNA B930095G15 gene [Source:MGI Symbol;Acc:MGI:2443701]	0.319197	5.69153	2.52017	0.0147678	0.999227	-3.78951
ENSMUSG00000023919	Cenpq	protein_coding	MGI Symbol	3	centromere protein Q [Source:MGI Symbol;Acc:MGI:1933744]	0.354944	2.69459	2.30563	0.0250625	0.999227	-3.79439
ENSMUSG00000029228	Lnx1	protein_coding	MGI Symbol	9	ligand of numb-protein X 1 [Source:MGI Symbol;Acc:MGI:1278335]	0.384407	2.58583	2.28355	0.0264214	0.999227	-3.80249
ENSMUSG00000056214	Pard6g	protein_coding	MGI Symbol	1	par-6 family cell polarity regulator gamma [Source:MGI Symbol;Acc:MGI:2135606]	-0.345666	1.97999	-2.26702	0.0274817	0.999227	-3.81049
ENSMUSG00000041828	Abca8a	protein_coding	MGI Symbol	8	ATP-binding cassette, sub-family A (ABC1), member 8a [Source:MGI Symbol;Acc:MGI:2386846]	-0.492403	2.0648	-2.28356	0.0264208	0.999227	-3.81379
ENSMUSG00000112117	Rmst	lincRNA	MGI Symbol	14	rhabdomyosarcoma 2 associated transcript (non-coding RNA) [Source:MGI Symbol;Acc:MGI:1099806]	-0.543447	0.105373	-2.1166	0.0389926	0.999227	-3.81511
ENSMUSG00000117648	Gm32282	bidirectional_promoter_lncRNA	MGI Symbol	1	predicted gene, 32282 [Source:MGI Symbol;Acc:MGI:5591441]	-0.712037	-0.144689	-2.11329	0.0392868	0.999227	-3.82173
ENSMUSG00000056155	Nanos3	protein_coding	MGI Symbol	3	nanos C2HC-type zinc finger 3 [Source:MGI Symbol;Acc:MGI:2675387]	-0.657612	-0.472135	-2.07409	0.04293	0.999227	-3.82259
ENSMUSG00000063838	Cdc42ep5	protein_coding	MGI Symbol	3	CDC42 effector protein (Rho GTPase binding) 5 [Source:MGI Symbol;Acc:MGI:1929745]	-0.556405	0.646902	-2.15706	0.0355418	0.999227	-3.82947
ENSMUSG00000083832	Gm13771	processed_pseudogene	MGI Symbol	1	predicted gene 13771 [Source:MGI Symbol;Acc:MGI:3650181]	-0.586444	-0.187659	-2.09242	0.0411911	0.999227	-3.83119
ENSMUSG00000023391	Dlx2	protein_coding	MGI Symbol	2	distal-less homeobox 2 [Source:MGI Symbol;Acc:MGI:94902]	-0.482263	0.932117	-2.17527	0.0340783	0.999227	-3.83269
ENSMUSG00000111374	Gm50490	processed_pseudogene	MGI Symbol	1	predicted gene, 50490 [Source:MGI Symbol;Acc:MGI:6324767]	0.819588	-0.154022	2.03511	0.0468397	0.999227	-3.83599
ENSMUSG00000031072	LTO1	protein_coding	MGI Symbol	8	ABCE maturation factor [Source:MGI Symbol;Acc:MGI:1919534]	0.199639	4.86307	2.45748	0.0172864	0.999227	-3.83611
ENSMUSG00000086224	2700069I18Rik	antisense	MGI Symbol	2	RIKEN cDNA 2700069I18 gene [Source:MGI Symbol;Acc:MGI:1919858]	-0.498389	0.426373	-2.13321	0.0375417	0.999227	-3.84338
ENSMUSG00000070003	Ssbp4	protein_coding	MGI Symbol	15	single stranded DNA binding protein 4 [Source:MGI Symbol;Acc:MGI:1924150]	-0.520751	3.89114	-2.42964	0.0185244	0.999227	-3.84906
ENSMUSG00000057133	Chd6	protein_coding	MGI Symbol	11	chromodomain helicase DNA binding protein 6 [Source:MGI Symbol;Acc:MGI:1918639]	0.219569	5.44549	2.48203	0.0162575	0.999227	-3.85241
ENSMUSG00000029725	Ppp1r35	protein_coding	MGI Symbol	4	protein phosphatase 1, regulatory subunit 35 [Source:MGI Symbol;Acc:MGI:1922853]	-0.547466	1.89757	-2.25816	0.0280651	0.999227	-3.86126
ENSMUSG00000029781	Fkbp9	protein_coding	MGI Symbol	2	FK506 binding protein 9 [Source:MGI Symbol;Acc:MGI:1350921]	-0.389419	3.21005	-2.35395	0.0223033	0.999227	-3.86155
ENSMUSG00000037225	Fgf2	protein_coding	MGI Symbol	8	fibroblast growth factor 2 [Source:MGI Symbol;Acc:MGI:95516]	-0.343132	2.10772	-2.25437	0.0283179	0.999227	-3.86249
ENSMUSG00000020122	Egfr	protein_coding	MGI Symbol	5	epidermal growth factor receptor [Source:MGI Symbol;Acc:MGI:95294]	-0.445022	1.8739	-2.24603	0.0288816	0.999227	-3.87204
ENSMUSG00000055172	C1ra	protein_coding	MGI Symbol	1	complement component 1, r subcomponent A [Source:MGI Symbol;Acc:MGI:1355313]	-0.640361	-0.357726	-2.04681	0.0456349	0.999227	-3.87775
ENSMUSG00000023046	Igfbp6	protein_coding	MGI Symbol	1	insulin-like growth factor binding protein 6 [Source:MGI Symbol;Acc:MGI:96441]	0.444295	4.33143	2.38497	0.0206782	0.999227	-3.87933
ENSMUSG00000020275	Rel	protein_coding	MGI Symbol	1	reticuloendotheliosis oncogene [Source:MGI Symbol;Acc:MGI:97897]	0.388993	2.2715	2.22746	0.0301729	0.999227	-3.88076
ENSMUSG00000050714	Zbtb26	protein_coding	MGI Symbol	3	zinc finger and BTB domain containing 26 [Source:MGI Symbol;Acc:MGI:2444402]	0.362106	2.73257	2.25456	0.0283055	0.999227	-3.88387
ENSMUSG00000094989	Rpl9-ps4	processed_pseudogene	MGI Symbol	1	ribosomal protein L9, pseudogene 4 [Source:MGI Symbol;Acc:MGI:3704410]	0.393272	1.12518	2.11296	0.0393163	0.999227	-3.88629
ENSMUSG00000038188	Scarf1	protein_coding	MGI Symbol	3	scavenger receptor class F, member 1 [Source:MGI Symbol;Acc:MGI:2449455]	-0.765929	0.18168	-2.09705	0.0407619	0.999227	-3.89452
ENSMUSG00000022969	Il10rb	protein_coding	MGI Symbol	5	interleukin 10 receptor, beta [Source:MGI Symbol;Acc:MGI:109380]	-0.404282	2.10027	-2.24137	0.0292009	0.999227	-3.89806
ENSMUSG00000043165	Lor	protein_coding	MGI Symbol	1	loricrin [Source:MGI Symbol;Acc:MGI:96816]	-0.474146	1.12063	-2.15488	0.0357205	0.999227	-3.89936
ENSMUSG00000028555	Ttc39a	protein_coding	MGI Symbol	8	tetratricopeptide repeat domain 39A [Source:MGI Symbol;Acc:MGI:2444350]	0.792131	-0.000151847	1.99525	0.051152	0.999227	-3.90118
ENSMUSG00000061878	Sphk1	protein_coding	MGI Symbol	17	sphingosine kinase 1 [Source:MGI Symbol;Acc:MGI:1316649]	-0.556772	0.684696	-2.12138	0.0385697	0.999227	-3.90141
ENSMUSG00000049791	Fzd4	protein_coding	MGI Symbol	1	frizzled class receptor 4 [Source:MGI Symbol;Acc:MGI:108520]	-0.511141	1.81406	-2.21109	0.0313527	0.999227	-3.90509
ENSMUSG00000029504	Ddx51	protein_coding	MGI Symbol	5	DEAD (Asp-Glu-Ala-Asp) box polypeptide 51 [Source:MGI Symbol;Acc:MGI:1916913]	-0.346767	2.71444	-2.28601	0.026267	0.999227	-3.9102
ENSMUSG00000023918	Adgrf4	protein_coding	MGI Symbol	4	adhesion G protein-coupled receptor F4 [Source:MGI Symbol;Acc:MGI:1925499]	0.903215	-0.115763	1.96922	0.0541494	0.999227	-3.91225
ENSMUSG00000002799	Jag2	protein_coding	MGI Symbol	10	jagged 2 [Source:MGI Symbol;Acc:MGI:1098270]	-0.404527	2.73515	-2.29635	0.025626	0.999227	-3.91453
ENSMUSG00000035773	Kiss1r	protein_coding	MGI Symbol	3	KISS1 receptor [Source:MGI Symbol;Acc:MGI:2148793]	-0.670406	0.0562365	-2.0586	0.0444481	0.999227	-3.9211
ENSMUSG00000017550	Atad5	protein_coding	MGI Symbol	4	ATPase family, AAA domain containing 5 [Source:MGI Symbol;Acc:MGI:2442925]	0.433039	1.70145	2.13808	0.0371254	0.999227	-3.92837
ENSMUSG00000022360	Atad2	protein_coding	MGI Symbol	8	ATPase family, AAA domain containing 2 [Source:MGI Symbol;Acc:MGI:1917722]	0.381595	2.47765	2.21019	0.0314188	0.999227	-3.93606
ENSMUSG00000078439	Smim24	protein_coding	MGI Symbol	3	small integral membrane protein 24 [Source:MGI Symbol;Acc:MGI:1919523]	0.795918	0.403076	2.00206	0.0503917	0.999227	-3.93838
ENSMUSG00000102440	Pcdhga9	protein_coding	MGI Symbol	2	protocadherin gamma subfamily A, 9 [Source:MGI Symbol;Acc:MGI:1935226]	0.890545	-0.14026	1.96144	0.0550738	0.999227	-3.93978
ENSMUSG00000104204	Gm37397	TEC	MGI Symbol	1	predicted gene, 37397 [Source:MGI Symbol;Acc:MGI:5610625]	0.648095	-0.170399	1.97115	0.053922	0.999227	-3.9444
ENSMUSG00000059049	Frem1	protein_coding	MGI Symbol	8	Fras1 related extracellular matrix protein 1 [Source:MGI Symbol;Acc:MGI:2670972]	-0.710423	-0.176806	-2.01882	0.048562	0.999227	-3.9458
ENSMUSG00000045094	Arhgef37	protein_coding	MGI Symbol	3	Rho guanine nucleotide exchange factor (GEF) 37 [Source:MGI Symbol;Acc:MGI:3045339]	0.71516	-0.0895132	1.96837	0.0542499	0.999227	-3.95158
ENSMUSG00000109904	Gm45819	TEC	MGI Symbol	1	predicted gene 45819 [Source:MGI Symbol;Acc:MGI:5804934]	-0.346224	1.41489	-2.14718	0.0363589	0.999227	-3.95364
ENSMUSG00000022831	Hcls1	protein_coding	MGI Symbol	3	hematopoietic cell specific Lyn substrate 1 [Source:MGI Symbol;Acc:MGI:104568]	0.376251	2.43669	2.19955	0.0322092	0.999227	-3.9547
ENSMUSG00000026676	Ccdc3	protein_coding	MGI Symbol	1	coiled-coil domain containing 3 [Source:MGI Symbol;Acc:MGI:1921436]	-0.32465	3.71076	-2.33737	0.0232177	0.999227	-3.96525
ENSMUSG00000050854	Tmem125	protein_coding	MGI Symbol	5	transmembrane protein 125 [Source:MGI Symbol;Acc:MGI:1923409]	-0.352664	3.41524	-2.32458	0.0239457	0.999227	-3.96938
ENSMUSG00000089815	Gm5083	lincRNA	MGI Symbol	2	predicted gene 5083 [Source:MGI Symbol;Acc:MGI:3779454]	0.599661	0.32826	1.99874	0.0507614	0.999227	-3.97333
ENSMUSG00000020752	Recql5	protein_coding	MGI Symbol	8	RecQ protein-like 5 [Source:MGI Symbol;Acc:MGI:2156841]	0.262625	4.08887	2.33647	0.0232684	0.999227	-3.97539
ENSMUSG00000041801	Phlda3	protein_coding	MGI Symbol	2	pleckstrin homology like domain, family A, member 3 [Source:MGI Symbol;Acc:MGI:1351485]	-0.480893	3.1876	-2.31002	0.0247996	0.999227	-3.97793
ENSMUSG00000093880	Tmem181c-ps	unprocessed_pseudogene	MGI Symbol	1	transmembrane protein 181C, pseudogene [Source:MGI Symbol;Acc:MGI:3780993]	-0.614295	-0.222466	-1.99636	0.0510282	0.999227	-3.98522
ENSMUSG00000039810	Zc3h10	protein_coding	MGI Symbol	4	zinc finger CCCH type containing 10 [Source:MGI Symbol;Acc:MGI:2143670]	0.258684	3.59721	2.29375	0.0257856	0.999227	-3.98617
ENSMUSG00000085251	Gm12326	lincRNA	MGI Symbol	2	predicted gene 12326 [Source:MGI Symbol;Acc:MGI:3651350]	0.66994	-0.0919392	1.94924	0.0565512	0.999227	-3.98831
ENSMUSG00000041133	Smc1a	protein_coding	MGI Symbol	6	structural maintenance of chromosomes 1A [Source:MGI Symbol;Acc:MGI:1344345]	0.208068	6.29247	2.45031	0.0175982	0.999227	-4.00168
ENSMUSG00000062284	Gm6030	processed_pseudogene	MGI Symbol	1	predicted gene 6030 [Source:MGI Symbol;Acc:MGI:3645112]	0.544511	0.0733324	1.95768	0.0555261	0.999227	-4.00504
ENSMUSG00000020248	Nfyb	protein_coding	MGI Symbol	7	nuclear transcription factor-Y beta [Source:MGI Symbol;Acc:MGI:97317]	-0.159204	5.90159	-2.44455	0.0178518	0.999227	-4.00637
ENSMUSG00000020018	Snrpf	protein_coding	MGI Symbol	1	small nuclear ribonucleoprotein polypeptide F [Source:MGI Symbol;Acc:MGI:1917128]	-0.50045	0.449523	-2.02562	0.0478362	0.999227	-4.00679
ENSMUSG00000041870	Ankrd13a	protein_coding	MGI Symbol	6	ankyrin repeat domain 13a [Source:MGI Symbol;Acc:MGI:1915670]	-0.295395	4.2893	-2.36064	0.0219433	0.999227	-4.01489
ENSMUSG00000040373	Cacng5	protein_coding	MGI Symbol	2	calcium channel, voltage-dependent, gamma subunit 5 [Source:MGI Symbol;Acc:MGI:2157946]	-0.322327	3.80657	-2.32086	0.0241616	0.999227	-4.01795
ENSMUSG00000026162	Nhej1	protein_coding	MGI Symbol	2	non-homologous end joining factor 1 [Source:MGI Symbol;Acc:MGI:1922820]	0.346898	1.89888	2.1105	0.0395374	0.999227	-4.02052
ENSMUSG00000021765	Fst	protein_coding	MGI Symbol	6	follistatin [Source:MGI Symbol;Acc:MGI:95586]	0.764681	0.647145	1.96277	0.0549155	0.999227	-4.02204
ENSMUSG00000086606	Gm13205	antisense	MGI Symbol	1	predicted gene 13205 [Source:MGI Symbol;Acc:MGI:3700976]	-0.385239	1.12969	-2.09122	0.0413033	0.999227	-4.02378
ENSMUSG00000117674	Gm31087	antisense	MGI Symbol	1	predicted gene, 31087 [Source:MGI Symbol;Acc:MGI:5590246]	0.47393	0.430141	1.96922	0.0541497	0.999227	-4.02803
ENSMUSG00000039977	Deup1	protein_coding	MGI Symbol	5	deuterosome assembly protein 1 [Source:MGI Symbol;Acc:MGI:2443026]	1.02555	-0.499596	1.86942	0.0670772	0.999227	-4.03481
ENSMUSG00000078515	Ddi2	protein_coding	MGI Symbol	2	DNA-damage inducible protein 2 [Source:MGI Symbol;Acc:MGI:1917244]	0.210835	6.61719	2.44182	0.0179736	0.999227	-4.03608
ENSMUSG00000048602	Morc2b	protein_coding	MGI Symbol	3	microrchidia 2B [Source:MGI Symbol;Acc:MGI:3045293]	0.430333	1.45219	2.05309	0.0449989	0.999227	-4.04304
ENSMUSG00000104415	Gm37069	TEC	MGI Symbol	1	predicted gene, 37069 [Source:MGI Symbol;Acc:MGI:5610297]	0.48462	0.899443	2.00144	0.0504606	0.999227	-4.04358
ENSMUSG00000104696	Gm42946	TEC	MGI Symbol	1	predicted gene 42946 [Source:MGI Symbol;Acc:MGI:5663083]	1.07132	0.529395	1.92723	0.0593022	0.999227	-4.04485
ENSMUSG00000028601	Echdc2	protein_coding	MGI Symbol	13	enoyl Coenzyme A hydratase domain containing 2 [Source:MGI Symbol;Acc:MGI:1289238]	0.331648	3.92041	2.27936	0.0266866	0.999227	-4.05536
ENSMUSG00000078919	Dpm1	protein_coding	MGI Symbol	10	dolichol-phosphate (beta-D) mannosyltransferase 1 [Source:MGI Symbol;Acc:MGI:1330239]	0.242111	4.01399	2.29661	0.0256099	0.999227	-4.05729
ENSMUSG00000020178	Adora2a	protein_coding	MGI Symbol	4	adenosine A2a receptor [Source:MGI Symbol;Acc:MGI:99402]	-0.559349	0.168207	-1.97602	0.0533526	0.999227	-4.05833
ENSMUSG00000044595	Dnd1	protein_coding	MGI Symbol	3	DND microRNA-mediated repression inhibitor 1 [Source:MGI Symbol;Acc:MGI:2447763]	0.550235	0.782789	1.97012	0.0540433	0.999227	-4.05881
ENSMUSG00000020811	Wscd1	protein_coding	MGI Symbol	6	WSC domain containing 1 [Source:MGI Symbol;Acc:MGI:2448493]	-0.347668	5.73545	-2.41942	0.0189985	0.999227	-4.06193
ENSMUSG00000026894	Morn5	protein_coding	MGI Symbol	1	MORN repeat containing 5 [Source:MGI Symbol;Acc:MGI:1922745]	0.62188	0.500895	1.95208	0.0562052	0.999227	-4.06435
ENSMUSG00000107639	Gm4374	processed_pseudogene	MGI Symbol	1	predicted gene 4374 [Source:MGI Symbol;Acc:MGI:3782559]	-0.475986	0.59152	-2.02386	0.0480231	0.999227	-4.0647
ENSMUSG00000047407	Tgif1	protein_coding	MGI Symbol	12	TGFB-induced factor homeobox 1 [Source:MGI Symbol;Acc:MGI:1194497]	-0.447066	1.05164	-2.05088	0.0452219	0.999227	-4.06995
ENSMUSG00000109625	3110080E11Rik	TEC	MGI Symbol	1	RIKEN cDNA 3110080E11 gene [Source:MGI Symbol;Acc:MGI:1920469]	1.06151	-0.579201	1.83999	0.0713563	0.999227	-4.08222
ENSMUSG00000040289	Hey1	protein_coding	MGI Symbol	4	hairy/enhancer-of-split related with YRPW motif 1 [Source:MGI Symbol;Acc:MGI:1341800]	-0.212776	6.03383	-2.41589	0.0191647	0.999227	-4.08365
ENSMUSG00000037735	2810032G03Rik	lincRNA	MGI Symbol	2	RIKEN cDNA 2810032G03 gene [Source:MGI Symbol;Acc:MGI:1919919]	-0.319466	2.8912	-2.21641	0.0309646	0.999227	-4.08616
ENSMUSG00000037656	Slc20a2	protein_coding	MGI Symbol	5	solute carrier family 20, member 2 [Source:MGI Symbol;Acc:MGI:97851]	-0.312141	4.01344	-2.30894	0.0248644	0.999227	-4.08657
ENSMUSG00000036106	Prr5	protein_coding	MGI Symbol	2	proline rich 5 (renal) [Source:MGI Symbol;Acc:MGI:1924714]	-0.344095	3.23918	-2.24602	0.0288824	0.999227	-4.08786
ENSMUSG00000019027	Dnah1	protein_coding	MGI Symbol	2	dynein, axonemal, heavy chain 1 [Source:MGI Symbol;Acc:MGI:107721]	0.344454	2.0336	2.09219	0.0412126	0.999227	-4.0881
ENSMUSG00000059436	Max	protein_coding	MGI Symbol	7	Max protein [Source:MGI Symbol;Acc:MGI:96921]	0.289152	6.15403	2.40398	0.0197355	0.999227	-4.08877
ENSMUSG00000015484	Fam163a	protein_coding	MGI Symbol	1	family with sequence similarity 163, member A [Source:MGI Symbol;Acc:MGI:3618859]	0.374745	3.6316	2.23985	0.0293055	0.999227	-4.08999
ENSMUSG00000038352	Arl5c	protein_coding	MGI Symbol	2	ADP-ribosylation factor-like 5C [Source:MGI Symbol;Acc:MGI:3028577]	0.358844	2.73187	2.15833	0.035438	0.999227	-4.09186
ENSMUSG00000027509	Rae1	protein_coding	MGI Symbol	5	ribonucleic acid export 1 [Source:MGI Symbol;Acc:MGI:1913929]	-0.440397	5.26061	-2.38973	0.0204383	0.999227	-4.09204
ENSMUSG00000030824	Nucb1	protein_coding	MGI Symbol	10	nucleobindin 1 [Source:MGI Symbol;Acc:MGI:97388]	-0.252136	5.2877	-2.38365	0.0207451	0.999227	-4.09284
ENSMUSG00000018427	Ypel2	protein_coding	MGI Symbol	2	yippee like 2 [Source:MGI Symbol;Acc:MGI:1925114]	0.219283	5.62796	2.37958	0.0209529	0.999227	-4.09804
ENSMUSG00000032485	Scap	protein_coding	MGI Symbol	10	SREBF chaperone [Source:MGI Symbol;Acc:MGI:2135958]	-0.336734	4.33603	-2.32289	0.0240436	0.999227	-4.10495
ENSMUSG00000040078	Ptges3-ps	processed_pseudogene	MGI Symbol	1	prostaglandin E synthase 3, pseudogene [Source:MGI Symbol;Acc:MGI:3704271]	-0.371713	2.8702	-2.22079	0.0306486	0.999227	-4.10656
ENSMUSG00000106651	Gm42608	TEC	MGI Symbol	1	predicted gene 42608 [Source:MGI Symbol;Acc:MGI:5662745]	0.61698	0.265885	1.90685	0.0619503	0.999227	-4.10741
ENSMUSG00000060843	Ctnna3	protein_coding	MGI Symbol	5	catenin (cadherin associated protein), alpha 3 [Source:MGI Symbol;Acc:MGI:2661445]	0.804988	-0.460139	1.84167	0.0711061	0.999227	-4.10875
ENSMUSG00000079364	Gm3558	protein_coding	MGI Symbol	1	predicted gene 3558 [Source:MGI Symbol;Acc:MGI:3781735]	0.573156	-0.22407	1.8636	0.067905	0.999227	-4.11184
ENSMUSG00000035293	G2e3	protein_coding	MGI Symbol	5	G2/M-phase specific E3 ubiquitin ligase [Source:MGI Symbol;Acc:MGI:2444298]	0.274654	3.51755	2.21833	0.0308257	0.999227	-4.11676
ENSMUSG00000020695	Mrc2	protein_coding	MGI Symbol	5	mannose receptor, C type 2 [Source:MGI Symbol;Acc:MGI:107818]	-0.757995	0.152002	-1.96363	0.0548124	0.999227	-4.11706
ENSMUSG00000038525	Armc10	protein_coding	MGI Symbol	5	armadillo repeat containing 10 [Source:MGI Symbol;Acc:MGI:1914461]	-0.366483	4.26187	-2.31568	0.0244645	0.999227	-4.11729
ENSMUSG00000116508	Gm49463	antisense	MGI Symbol	1	predicted gene, 49463 [Source:MGI Symbol;Acc:MGI:6155122]	-0.507141	-0.0335592	-1.92334	0.059801	0.999227	-4.11805
ENSMUSG00000015337	Endog	protein_coding	MGI Symbol	1	endonuclease G [Source:MGI Symbol;Acc:MGI:1261433]	-0.445573	0.697881	-1.98618	0.0521798	0.999227	-4.12112
ENSMUSG00000112763	Gm34304	lincRNA	MGI Symbol	1	predicted gene, 34304 [Source:MGI Symbol;Acc:MGI:5593463]	-0.317121	1.64289	-2.08405	0.0419773	0.999227	-4.12131
ENSMUSG00000007594	Hapln4	protein_coding	MGI Symbol	3	hyaluronan and proteoglycan link protein 4 [Source:MGI Symbol;Acc:MGI:2679531]	-0.337703	5.15484	-2.3671	0.0216008	0.999227	-4.1241
ENSMUSG00000114584	Gm47694	TEC	MGI Symbol	1	predicted gene, 47694 [Source:MGI Symbol;Acc:MGI:6096803]	0.618878	0.0821183	1.88057	0.0655132	0.999227	-4.12419
ENSMUSG00000029710	Ephb4	protein_coding	MGI Symbol	5	Eph receptor B4 [Source:MGI Symbol;Acc:MGI:104757]	-0.721021	-0.455138	-1.90585	0.0620833	0.999227	-4.1244
ENSMUSG00000028125	Abca4	protein_coding	MGI Symbol	10	ATP-binding cassette, sub-family A (ABC1), member 4 [Source:MGI Symbol;Acc:MGI:109424]	-0.971447	-0.247464	-1.92068	0.0601432	0.999227	-4.12859
ENSMUSG00000115624	Gm49204	TEC	MGI Symbol	1	predicted gene, 49204 [Source:MGI Symbol;Acc:MGI:6118653]	-0.759229	-0.314406	-1.89764	0.0631809	0.999227	-4.13006
ENSMUSG00000086118	Gm14169	processed_transcript	MGI Symbol	1	predicted gene 14169 [Source:MGI Symbol;Acc:MGI:3651156]	0.479696	1.39809	1.98504	0.05231	0.999227	-4.13218
ENSMUSG00000030048	Gkn3	protein_coding	MGI Symbol	1	gastrokine 3 [Source:MGI Symbol;Acc:MGI:1916138]	-0.580863	0.201266	-1.96808	0.0542847	0.999227	-4.13229
ENSMUSG00000097251	5033417F24Rik	antisense	MGI Symbol	1	RIKEN cDNA 5033417F24 gene [Source:MGI Symbol;Acc:MGI:1923245]	0.55261	-0.438319	1.83508	0.0720919	0.999227	-4.13692
ENSMUSG00000103009	Gm4430	TEC	MGI Symbol	1	predicted gene 4430 [Source:MGI Symbol;Acc:MGI:3782614]	-0.464777	0.752903	-2.0041	0.0501664	0.999227	-4.13878
ENSMUSG00000115023	Gm48967	TEC	MGI Symbol	1	predicted gene, 48967 [Source:MGI Symbol;Acc:MGI:6118304]	1.00385	-0.629855	1.80203	0.0772114	0.999227	-4.14106
ENSMUSG00000025817	Nudt5	protein_coding	MGI Symbol	6	nudix (nucleoside diphosphate linked moiety X)-type motif 5 [Source:MGI Symbol;Acc:MGI:1858232]	0.164347	5.18166	2.33825	0.0231684	0.999227	-4.14206
ENSMUSG00000104114	Gm37297	TEC	MGI Symbol	1	predicted gene, 37297 [Source:MGI Symbol;Acc:MGI:5610525]	0.950541	-0.115364	1.81633	0.0749607	0.999227	-4.14473
ENSMUSG00000097915	A330009N23Rik	antisense	MGI Symbol	3	RIKEN cDNA A330009N23 gene [Source:MGI Symbol;Acc:MGI:2443491]	0.260735	2.95282	2.15617	0.0356145	0.999227	-4.14716
ENSMUSG00000034509	Mad2l1bp	protein_coding	MGI Symbol	1	MAD2L1 binding protein [Source:MGI Symbol;Acc:MGI:1913841]	0.241751	4.24215	2.26605	0.027545	0.999227	-4.15068
ENSMUSG00000021319	Sfrp4	protein_coding	MGI Symbol	4	secreted frizzled-related protein 4 [Source:MGI Symbol;Acc:MGI:892010]	0.578825	1.02808	1.93033	0.0589078	0.999227	-4.16983
ENSMUSG00000032558	Nphp3	protein_coding	MGI Symbol	8	nephronophthisis 3 (adolescent) [Source:MGI Symbol;Acc:MGI:1921275]	-0.551288	0.9491	-1.98393	0.0524374	0.999227	-4.1699
ENSMUSG00000098128	Gm3693	antisense	MGI Symbol	1	predicted gene 3693 [Source:MGI Symbol;Acc:MGI:3781869]	0.557674	0.601194	1.89384	0.0636941	0.999227	-4.17018
ENSMUSG00000058290	Espl1	protein_coding	MGI Symbol	9	extra spindle pole bodies 1, separase [Source:MGI Symbol;Acc:MGI:2146156]	0.596676	-0.129778	1.82992	0.0728709	0.999227	-4.17274
ENSMUSG00000033882	Rbm46	protein_coding	MGI Symbol	3	RNA binding motif protein 46 [Source:MGI Symbol;Acc:MGI:3645057]	-0.695246	-0.0202021	-1.9024	0.062542	0.999227	-4.17656
ENSMUSG00000044646	Zbtb7c	protein_coding	MGI Symbol	3	zinc finger and BTB domain containing 7C [Source:MGI Symbol;Acc:MGI:2443302]	-0.55011	-0.0410811	-1.89988	0.0628798	0.999227	-4.18036
ENSMUSG00000045193	Cirbp	protein_coding	MGI Symbol	7	cold inducible RNA binding protein [Source:MGI Symbol;Acc:MGI:893588]	-0.282284	7.90789	-2.3976	0.0200475	0.999227	-4.18059
ENSMUSG00000030199	Etv6	protein_coding	MGI Symbol	5	ets variant 6 [Source:MGI Symbol;Acc:MGI:109336]	-0.274511	2.60685	-2.14298	0.0367108	0.999227	-4.18304
ENSMUSG00000097863	1010001B22Rik	lincRNA	MGI Symbol	1	RIKEN cDNA 1010001B22 gene [Source:MGI Symbol;Acc:MGI:1922653]	-0.463793	0.156825	-1.90562	0.0621144	0.999227	-4.18688
ENSMUSG00000075296	Aldh3b2	protein_coding	MGI Symbol	1	aldehyde dehydrogenase 3 family, member B2 [Source:MGI Symbol;Acc:MGI:2147613]	0.395184	2.00036	2.01055	0.049458	0.999227	-4.18848
ENSMUSG00000114401	Gm38604	antisense	MGI Symbol	2	predicted gene, 38604 [Source:MGI Symbol;Acc:MGI:5621489]	0.586057	-0.201553	1.82207	0.0740718	0.999227	-4.18911
ENSMUSG00000113780	Gm33195	lincRNA	MGI Symbol	1	predicted gene, 33195 [Source:MGI Symbol;Acc:MGI:5592354]	0.553439	0.412934	1.86398	0.0678518	0.999227	-4.18994
ENSMUSG00000047606	Ankrd34c	protein_coding	MGI Symbol	2	ankyrin repeat domain 34C [Source:MGI Symbol;Acc:MGI:2685617]	0.611019	0.447975	1.85423	0.069257	0.999227	-4.1902
ENSMUSG00000059852	Kcng2	protein_coding	MGI Symbol	3	potassium voltage-gated channel, subfamily G, member 2 [Source:MGI Symbol;Acc:MGI:3694646]	-0.383249	2.77731	-2.15843	0.0354298	0.999227	-4.19028
ENSMUSG00000047419	Cmya5	protein_coding	MGI Symbol	1	cardiomyopathy associated 5 [Source:MGI Symbol;Acc:MGI:1923719]	0.304459	2.2434	2.06244	0.0440675	0.999227	-4.19598
ENSMUSG00000019936	Epyc	protein_coding	MGI Symbol	2	epiphycan [Source:MGI Symbol;Acc:MGI:107942]	0.598021	0.074246	1.82523	0.073586	0.999227	-4.1962
ENSMUSG00000072915	Gm12258	protein_coding	MGI Symbol	3	predicted gene 12258 [Source:MGI Symbol;Acc:MGI:3651534]	0.264749	3.72534	2.19551	0.0325132	0.999227	-4.19714
ENSMUSG00000043557	Mdga1	protein_coding	MGI Symbol	10	MAM domain containing glycosylphosphatidylinositol anchor 1 [Source:MGI Symbol;Acc:MGI:1922012]	-0.308427	4.24531	-2.27037	0.027264	0.999227	-4.19816
ENSMUSG00000056004	9330182L06Rik	protein_coding	MGI Symbol	8	RIKEN cDNA 9330182L06 gene [Source:MGI Symbol;Acc:MGI:2443264]	-0.313421	3.09063	-2.17326	0.034237	0.999227	-4.20168
ENSMUSG00000026443	Lrrn2	protein_coding	MGI Symbol	2	leucine rich repeat protein 2, neuronal [Source:MGI Symbol;Acc:MGI:106037]	-0.28403	6.95005	-2.37548	0.0211637	0.999227	-4.2049
ENSMUSG00000030796	Tead2	protein_coding	MGI Symbol	17	TEA domain family member 2 [Source:MGI Symbol;Acc:MGI:104904]	0.579298	0.0112117	1.81398	0.0753263	0.999227	-4.20493
ENSMUSG00000030230	Plcz1	protein_coding	MGI Symbol	4	phospholipase C, zeta 1 [Source:MGI Symbol;Acc:MGI:2150308]	0.547852	0.481998	1.84926	0.0699836	0.999227	-4.20651
ENSMUSG00000070369	Itgad	protein_coding	MGI Symbol	5	integrin, alpha D [Source:MGI Symbol;Acc:MGI:3578624]	0.950488	-0.544802	1.76208	0.0838045	0.999227	-4.20838
ENSMUSG00000022805	Maats1	protein_coding	MGI Symbol	2	MYCBP-associated, testis expressed 1 [Source:MGI Symbol;Acc:MGI:2443598]	0.636036	-0.116144	1.7969	0.078033	0.999227	-4.20969
ENSMUSG00000028626	Col9a2	protein_coding	MGI Symbol	3	collagen, type IX, alpha 2 [Source:MGI Symbol;Acc:MGI:88466]	-0.540082	-0.386454	-1.85575	0.0690362	0.999227	-4.20984
ENSMUSG00000086533	Mypopos	antisense	MGI Symbol	4	Myb-related transcription factor, partner of profilin, opposite strand [Source:MGI Symbol;Acc:MGI:3826523]	-0.789238	-0.670405	-1.82094	0.0742461	0.999227	-4.21098
ENSMUSG00000091387	Gcnt4	protein_coding	MGI Symbol	1	glucosaminyl (N-acetyl) transferase 4, core 2 (beta-1,6-N-acetylglucosaminyltransferase) [Source:MGI Symbol;Acc:MGI:2684919]	0.74515	-0.00737636	1.81062	0.0758531	0.999227	-4.21286
ENSMUSG00000039246	Lyplal1	protein_coding	MGI Symbol	2	lysophospholipase-like 1 [Source:MGI Symbol;Acc:MGI:2385115]	0.276731	3.77564	2.19108	0.0328502	0.999227	-4.21458
ENSMUSG00000025236	Adpgk	protein_coding	MGI Symbol	5	ADP-dependent glucokinase [Source:MGI Symbol;Acc:MGI:1919391]	-0.355819	2.37721	-2.10245	0.0402662	0.999227	-4.21555
ENSMUSG00000113769	5033406O09Rik	lincRNA	MGI Symbol	4	RIKEN cDNA 5033406O09 gene [Source:MGI Symbol;Acc:MGI:1923205]	-0.60145	-0.299418	-1.84057	0.0712689	0.999227	-4.2166
ENSMUSG00000018654	Ikzf1	protein_coding	MGI Symbol	6	IKAROS family zinc finger 1 [Source:MGI Symbol;Acc:MGI:1342540]	0.543626	1.06609	1.88686	0.0646456	0.999227	-4.21775
ENSMUSG00000027849	Syt6	protein_coding	MGI Symbol	10	synaptotagmin VI [Source:MGI Symbol;Acc:MGI:1859544]	-0.343042	1.90967	-2.04963	0.0453488	0.999227	-4.21808
ENSMUSG00000033055	Ankrd54	protein_coding	MGI Symbol	8	ankyrin repeat domain 54 [Source:MGI Symbol;Acc:MGI:2444209]	-0.338513	2.78224	-2.13832	0.037105	0.999227	-4.21812
ENSMUSG00000048616	Nog	protein_coding	MGI Symbol	1	noggin [Source:MGI Symbol;Acc:MGI:104327]	-0.628568	-0.103847	-1.88904	0.0643472	0.999227	-4.21832
ENSMUSG00000015980	Lrrc27	protein_coding	MGI Symbol	9	leucine rich repeat containing 27 [Source:MGI Symbol;Acc:MGI:1923862]	0.319871	2.88382	2.1022	0.0402893	0.999227	-4.22067
ENSMUSG00000031825	Crispld2	protein_coding	MGI Symbol	5	cysteine-rich secretory protein LCCL domain containing 2 [Source:MGI Symbol;Acc:MGI:1926142]	-0.568213	0.650318	-1.93579	0.0582195	0.999227	-4.22148
ENSMUSG00000117486	Gm30938	lincRNA	MGI Symbol	1	predicted gene, 30938 [Source:MGI Symbol;Acc:MGI:5590097]	0.594622	-0.185175	1.77341	0.0818891	0.999227	-4.22912
ENSMUSG00000039646	Vasn	protein_coding	MGI Symbol	2	vasorin [Source:MGI Symbol;Acc:MGI:2177651]	-0.395216	1.85703	-2.0377	0.0465701	0.999227	-4.23384
ENSMUSG00000078580	E430018J23Rik	protein_coding	MGI Symbol	3	RIKEN cDNA E430018J23 gene [Source:MGI Symbol;Acc:MGI:2141981]	-0.266434	2.79996	-2.12766	0.0380207	0.999227	-4.23839
ENSMUSG00000017723	Wfdc2	protein_coding	MGI Symbol	5	WAP four-disulfide core domain 2 [Source:MGI Symbol;Acc:MGI:1914951]	-1.56899	-1.55082	-1.78873	0.0793567	0.999227	-4.24042
ENSMUSG00000038777	Sema6c	protein_coding	MGI Symbol	15	sema domain, transmembrane domain (TM), and cytoplasmic domain, (semaphorin) 6C [Source:MGI Symbol;Acc:MGI:1338032]	-0.643815	-0.123774	-1.84312	0.0708906	0.999227	-4.24226
ENSMUSG00000022490	Ppp1r1a	protein_coding	MGI Symbol	2	protein phosphatase 1, regulatory inhibitor subunit 1A [Source:MGI Symbol;Acc:MGI:1889595]	-0.35916	7.44089	-2.36513	0.021705	0.999227	-4.2436
ENSMUSG00000003271	Sult2b1	protein_coding	MGI Symbol	8	sulfotransferase family, cytosolic, 2B, member 1 [Source:MGI Symbol;Acc:MGI:1926342]	0.228134	4.1456	2.20752	0.0316156	0.999227	-4.25476
ENSMUSG00000102953	Gm37019	TEC	MGI Symbol	1	predicted gene, 37019 [Source:MGI Symbol;Acc:MGI:5610247]	1.15605	-0.310872	1.7211	0.0910491	0.999227	-4.25723
ENSMUSG00000050323	Ndufaf6	protein_coding	MGI Symbol	7	NADH:ubiquinone oxidoreductase complex assembly factor 6 [Source:MGI Symbol;Acc:MGI:1924197]	-0.484845	1.63166	-2.01449	0.0490294	0.999227	-4.25752
ENSMUSG00000003032	Klf4	protein_coding	MGI Symbol	3	Kruppel-like factor 4 (gut) [Source:MGI Symbol;Acc:MGI:1342287]	-0.59953	0.0890816	-1.85931	0.0685223	0.999227	-4.2587
ENSMUSG00000039496	Cdnf	protein_coding	MGI Symbol	3	cerebral dopamine neurotrophic factor [Source:MGI Symbol;Acc:MGI:3606576]	0.63187	0.0409257	1.77497	0.0816286	0.999227	-4.25965
ENSMUSG00000022554	Hgh1	protein_coding	MGI Symbol	3	HGH1 homolog [Source:MGI Symbol;Acc:MGI:1930628]	-0.457804	2.67805	-2.1128	0.0393313	0.999227	-4.26992
ENSMUSG00000003779	Kif20a	protein_coding	MGI Symbol	6	kinesin family member 20A [Source:MGI Symbol;Acc:MGI:1201682]	-0.549841	0.0520477	-1.85633	0.068952	0.999227	-4.27129
ENSMUSG00000114025	Gm49331	unprocessed_pseudogene	MGI Symbol	1	predicted gene, 49331 [Source:MGI Symbol;Acc:MGI:6121516]	-0.54471	-0.46634	-1.80144	0.0773069	0.999227	-4.27403
ENSMUSG00000051590	Map3k19	protein_coding	MGI Symbol	6	mitogen-activated protein kinase kinase kinase 19 [Source:MGI Symbol;Acc:MGI:1203481]	0.684361	0.418044	1.77711	0.0812716	0.999227	-4.27712
ENSMUSG00000049191	Rtl5	protein_coding	MGI Symbol	4	retrotransposon Gag like 5 [Source:MGI Symbol;Acc:MGI:3045324]	0.351771	2.0924	1.98881	0.0518801	0.999227	-4.28173
ENSMUSG00000038732	Mboat1	protein_coding	MGI Symbol	5	membrane bound O-acyltransferase domain containing 1 [Source:MGI Symbol;Acc:MGI:2387184]	-0.488984	0.968729	-1.93574	0.0582262	0.999227	-4.28736
ENSMUSG00000040586	Ofd1	protein_coding	MGI Symbol	1	OFD1, centriole and centriolar satellite protein [Source:MGI Symbol;Acc:MGI:1350328]	-0.307547	2.59405	-2.08562	0.0418287	0.999227	-4.29174
ENSMUSG00000027387	Zc3h8	protein_coding	MGI Symbol	1	zinc finger CCCH type containing 8 [Source:MGI Symbol;Acc:MGI:1930128]	0.235088	3.18908	2.10224	0.040286	0.999227	-4.29351
ENSMUSG00000066771	Gm5614	processed_pseudogene	MGI Symbol	1	predicted gene 5614 [Source:MGI Symbol;Acc:MGI:3644422]	0.406621	-0.0917372	1.76186	0.0838423	0.999227	-4.29381
ENSMUSG00000018217	Pmp22	protein_coding	MGI Symbol	5	peripheral myelin protein 22 [Source:MGI Symbol;Acc:MGI:97631]	-0.294429	4.56247	-2.24607	0.0288789	0.999227	-4.29434
ENSMUSG00000074634	Tmem267	protein_coding	MGI Symbol	5	transmembrane protein 267 [Source:MGI Symbol;Acc:MGI:3648543]	0.602243	3.2416	2.0914	0.0412861	0.999227	-4.29858
ENSMUSG00000039480	Nt5dc1	protein_coding	MGI Symbol	6	5prime-nucleotidase domain containing 1 [Source:MGI Symbol;Acc:MGI:2442446]	0.396712	1.27324	1.88853	0.0644162	0.999227	-4.29916
ENSMUSG00000038072	Galnt11	protein_coding	MGI Symbol	5	polypeptide N-acetylgalactosaminyltransferase 11 [Source:MGI Symbol;Acc:MGI:2444392]	-0.219974	4.14717	-2.20621	0.0317125	0.999227	-4.29999
ENSMUSG00000102101	Zbtb11os1	antisense	MGI Symbol	1	zinc finger and BTB domain containing 11, opposite strand 1 [Source:MGI Symbol;Acc:MGI:1913641]	-0.454137	0.133711	-1.84323	0.0708734	0.999227	-4.30085
ENSMUSG00000025511	Tspan4	protein_coding	MGI Symbol	7	tetraspanin 4 [Source:MGI Symbol;Acc:MGI:1928097]	-0.276262	2.61695	-2.07427	0.042912	0.999227	-4.30324
ENSMUSG00000112947	Gm47493	TEC	MGI Symbol	1	predicted gene, 47493 [Source:MGI Symbol;Acc:MGI:6096474]	1.08788	-0.39343	1.69377	0.0961617	0.999227	-4.30787
ENSMUSG00000011267	Zfp296	protein_coding	MGI Symbol	2	zinc finger protein 296 [Source:MGI Symbol;Acc:MGI:1926956]	-0.553056	-0.0305299	-1.81936	0.0744899	0.999227	-4.30807
ENSMUSG00000036639	Nudt1	protein_coding	MGI Symbol	7	nudix (nucleoside diphosphate linked moiety X)-type motif 1 [Source:MGI Symbol;Acc:MGI:109280]	0.337416	2.27234	1.99298	0.0514077	0.999227	-4.3087
ENSMUSG00000081684	Rps2-ps13	processed_pseudogene	MGI Symbol	1	ribosomal protein S2, pseudogene 13 [Source:MGI Symbol;Acc:MGI:3705640]	-0.499281	0.081626	-1.82978	0.0728931	0.999227	-4.30966
ENSMUSG00000040105	Plpp6	protein_coding	MGI Symbol	1	phospholipid phosphatase 6 [Source:MGI Symbol;Acc:MGI:1921661]	-0.268174	4.92062	-2.26317	0.0277335	0.999227	-4.31407
ENSMUSG00000033728	Lrrc14	protein_coding	MGI Symbol	10	leucine rich repeat containing 14 [Source:MGI Symbol;Acc:MGI:2445060]	-0.190903	4.88011	-2.25574	0.028226	0.999227	-4.31467
ENSMUSG00000081185	Gm4852	processed_pseudogene	MGI Symbol	1	predicted pseudogene 4852 [Source:MGI Symbol;Acc:MGI:3643039]	-0.410269	-0.051113	-1.81218	0.0756083	0.999227	-4.31513
ENSMUSG00000071724	Smpd5	protein_coding	MGI Symbol	4	sphingomyelin phosphodiesterase 5 [Source:MGI Symbol;Acc:MGI:3709877]	0.587242	-0.316207	1.72395	0.0905289	0.999227	-4.317
ENSMUSG00000019158	Tmem160	protein_coding	MGI Symbol	2	transmembrane protein 160 [Source:MGI Symbol;Acc:MGI:1916344]	-0.320496	3.33902	-2.13898	0.0370487	0.999227	-4.31728
ENSMUSG00000107512	Gm44433	TEC	MGI Symbol	1	predicted gene, 44433 [Source:MGI Symbol;Acc:MGI:5690825]	1.18716	-0.901837	1.64788	0.105277	0.999227	-4.32383
ENSMUSG00000043993	2900052L18Rik	processed_transcript	MGI Symbol	1	RIKEN cDNA 2900052L18 gene [Source:MGI Symbol;Acc:MGI:1924085]	-0.519255	-0.0554666	-1.80928	0.0760632	0.999227	-4.32535
ENSMUSG00000037892	Pcdh18	protein_coding	MGI Symbol	5	protocadherin 18 [Source:MGI Symbol;Acc:MGI:1920423]	-0.455183	0.341434	-1.82704	0.07331	0.999227	-4.3323
ENSMUSG00000097587	4930578M01Rik	processed_transcript	MGI Symbol	3	RIKEN cDNA 4930578M01 gene [Source:MGI Symbol;Acc:MGI:1923201]	0.334587	3.24202	2.08289	0.0420874	0.999227	-4.33564
ENSMUSG00000031962	Cdh15	protein_coding	MGI Symbol	1	cadherin 15 [Source:MGI Symbol;Acc:MGI:106672]	0.711911	2.61053	1.99779	0.0508679	0.999227	-4.33675
ENSMUSG00000014039	Prdm15	protein_coding	MGI Symbol	11	PR domain containing 15 [Source:MGI Symbol;Acc:MGI:1930121]	0.313913	3.25727	2.07855	0.0425012	0.999227	-4.33688
ENSMUSG00000028041	Adam15	protein_coding	MGI Symbol	13	a disintegrin and metallopeptidase domain 15 (metargidin) [Source:MGI Symbol;Acc:MGI:1333882]	-0.413546	4.09537	-2.19381	0.0326426	0.999227	-4.33818
ENSMUSG00000034255	Arhgap27	protein_coding	MGI Symbol	11	Rho GTPase activating protein 27 [Source:MGI Symbol;Acc:MGI:1916903]	-0.193383	4.93306	-2.24958	0.0286406	0.999227	-4.33838
ENSMUSG00000033083	Tbc1d4	protein_coding	MGI Symbol	10	TBC1 domain family, member 4 [Source:MGI Symbol;Acc:MGI:2429660]	0.341991	2.14658	1.96178	0.0550342	0.999227	-4.33978
ENSMUSG00000025150	Cbr2	protein_coding	MGI Symbol	4	carbonyl reductase 2 [Source:MGI Symbol;Acc:MGI:107200]	-0.611683	-0.433133	-1.77519	0.0815922	0.999227	-4.34274
ENSMUSG00000031111	Igsf1	protein_coding	MGI Symbol	5	immunoglobulin superfamily, member 1 [Source:MGI Symbol;Acc:MGI:2147913]	-0.391295	1.77329	-1.96504	0.0546446	0.999227	-4.34368
ENSMUSG00000030685	Kctd13	protein_coding	MGI Symbol	3	potassium channel tetramerisation domain containing 13 [Source:MGI Symbol;Acc:MGI:1923739]	-0.237005	6.47195	-2.30188	0.0252891	0.999227	-4.34699
ENSMUSG00000055409	Nell1	protein_coding	MGI Symbol	5	NEL-like 1 [Source:MGI Symbol;Acc:MGI:2443902]	-0.301707	4.39208	-2.20338	0.0319224	0.999227	-4.35041
ENSMUSG00000016206	H2-M3	protein_coding	MGI Symbol	1	histocompatibility 2, M region locus 3 [Source:MGI Symbol;Acc:MGI:95915]	-0.376453	0.923896	-1.86605	0.067556	0.999227	-4.35072
ENSMUSG00000045968	Teddm2	protein_coding	MGI Symbol	3	transmembrane epididymal family member 2 [Source:MGI Symbol;Acc:MGI:1923273]	-0.319592	1.42919	-1.93704	0.0580626	0.999227	-4.35383
ENSMUSG00000061882	Ccdc62	protein_coding	MGI Symbol	6	coiled-coil domain containing 62 [Source:MGI Symbol;Acc:MGI:2684996]	0.517528	0.481945	1.756	0.0848477	0.999227	-4.35612
ENSMUSG00000092344	Hspe1-ps3	processed_pseudogene	MGI Symbol	1	heat shock protein 1 (chaperonin 10), pseudogene 3 [Source:MGI Symbol;Acc:MGI:1935163]	-0.364358	-0.219135	-1.75723	0.0846373	0.999227	-4.35642
ENSMUSG00000091568	Gm8206	protein_coding	MGI Symbol	3	predicted gene 8206 [Source:MGI Symbol;Acc:MGI:3779788]	-0.491057	0.072477	-1.77904	0.0809513	0.999227	-4.35978
ENSMUSG00000078612	Fyb2	protein_coding	MGI Symbol	2	FYN binding protein 2 [Source:MGI Symbol;Acc:MGI:2685466]	-0.391568	2.21501	-2.01219	0.0492795	0.999227	-4.36195
ENSMUSG00000086368	Gm13830	lincRNA	MGI Symbol	5	predicted gene 13830 [Source:MGI Symbol;Acc:MGI:3651141]	0.504237	0.894645	1.79525	0.0782999	0.999227	-4.36319
ENSMUSG00000105331	Gm29865	lincRNA	MGI Symbol	1	predicted gene, 29865 [Source:MGI Symbol;Acc:MGI:5589024]	-0.381649	0.722738	-1.85441	0.0692314	0.999227	-4.36327
ENSMUSG00000026107	Nabp1	protein_coding	MGI Symbol	10	nucleic acid binding protein 1 [Source:MGI Symbol;Acc:MGI:1923258]	0.316003	3.61256	2.0965	0.0408131	0.999227	-4.36552
ENSMUSG00000076928	Trac	TR_C_gene	MGI Symbol	2	T cell receptor alpha constant [Source:MGI Symbol;Acc:MGI:4439838]	0.466036	0.661099	1.77991	0.0808076	0.999227	-4.36652
ENSMUSG00000049401	Ogfr	protein_coding	MGI Symbol	2	opioid growth factor receptor [Source:MGI Symbol;Acc:MGI:1919325]	-0.29448	4.23944	-2.19331	0.0326802	0.999227	-4.36669
ENSMUSG00000048070	Pirt	protein_coding	MGI Symbol	1	phosphoinositide-interacting regulator of transient receptor potential channels [Source:MGI Symbol;Acc:MGI:2443635]	1.01919	0.0472043	1.65288	0.10425	0.999227	-4.36673
ENSMUSG00000032782	Cntrob	protein_coding	MGI Symbol	10	centrobin, centrosomal BRCA2 interacting protein [Source:MGI Symbol;Acc:MGI:2443290]	-0.339149	2.57248	-2.0498	0.0453311	0.999227	-4.36798
ENSMUSG00000037922	Bank1	protein_coding	MGI Symbol	6	B cell scaffold protein with ankyrin repeats 1 [Source:MGI Symbol;Acc:MGI:2442120]	0.421407	1.68366	1.87999	0.0655946	0.999227	-4.36821
ENSMUSG00000110649	Gm40466	unprocessed_pseudogene	MGI Symbol	1	predicted gene, 40466 [Source:MGI Symbol;Acc:MGI:5623351]	-0.444187	0.227463	-1.79459	0.0784054	0.999227	-4.36853
ENSMUSG00000056919	Cep162	protein_coding	MGI Symbol	4	centrosomal protein 162 [Source:MGI Symbol;Acc:MGI:1925343]	0.249685	3.34725	2.07845	0.0425105	0.999227	-4.37094
ENSMUSG00000094732	1500015L24Rik	lincRNA	MGI Symbol	17	RIKEN cDNA 1500015L24 gene [Source:MGI Symbol;Acc:MGI:1916244]	-0.465951	-0.404379	-1.72796	0.0898021	0.999227	-4.37516
ENSMUSG00000049957	Ccdc137	protein_coding	MGI Symbol	8	coiled-coil domain containing 137 [Source:MGI Symbol;Acc:MGI:1914541]	-0.209344	4.71269	-2.2175	0.0308857	0.999227	-4.37626
ENSMUSG00000024538	Ppic	protein_coding	MGI Symbol	1	peptidylprolyl isomerase C [Source:MGI Symbol;Acc:MGI:97751]	-0.382928	0.774551	-1.86092	0.0682899	0.999227	-4.37747
ENSMUSG00000043410	Hfm1	protein_coding	MGI Symbol	7	HFM1, ATP-dependent DNA helicase homolog [Source:MGI Symbol;Acc:MGI:3036246]	-0.390794	0.778579	-1.8404	0.0712938	0.999227	-4.38671
ENSMUSG00000024260	Sap130	protein_coding	MGI Symbol	8	Sin3A associated protein [Source:MGI Symbol;Acc:MGI:1919782]	-0.220941	3.89485	-2.14579	0.036475	0.999227	-4.38829
ENSMUSG00000001366	Fbxo9	protein_coding	MGI Symbol	7	f-box protein 9 [Source:MGI Symbol;Acc:MGI:1918788]	-0.322139	5.50142	-2.25839	0.0280498	0.999227	-4.39016
ENSMUSG00000107937	Gm44200	sense_intronic	MGI Symbol	1	predicted gene, 44200 [Source:MGI Symbol;Acc:MGI:5690592]	0.922059	-0.290936	1.64809	0.105232	0.999227	-4.39365
ENSMUSG00000008307	1700109H08Rik	protein_coding	MGI Symbol	5	RIKEN cDNA 1700109H08 gene [Source:MGI Symbol;Acc:MGI:1924286]	-0.714446	-0.616603	-1.69742	0.0954643	0.999227	-4.3958
ENSMUSG00000099779	Gm8228	processed_pseudogene	MGI Symbol	1	predicted gene 8228 [Source:MGI Symbol;Acc:MGI:3646986]	-0.489039	0.280555	-1.7734	0.0818912	0.999227	-4.3986
ENSMUSG00000020718	Polg2	protein_coding	MGI Symbol	6	polymerase (DNA directed), gamma 2, accessory subunit [Source:MGI Symbol;Acc:MGI:1354947]	-0.513223	1.57439	-1.94743	0.0567734	0.999227	-4.39881
ENSMUSG00000093682	Gm20681	lincRNA	MGI Symbol	1	predicted gene 20681 [Source:MGI Symbol;Acc:MGI:5313128]	0.582275	-0.0272573	1.68825	0.0972232	0.999227	-4.39915
ENSMUSG00000062510	Nsl1	protein_coding	MGI Symbol	3	NSL1, MIS12 kinetochore complex component [Source:MGI Symbol;Acc:MGI:2685830]	0.479891	0.650827	1.75632	0.0847933	0.999227	-4.40107
ENSMUSG00000028047	Thbs3	protein_coding	MGI Symbol	11	thrombospondin 3 [Source:MGI Symbol;Acc:MGI:98739]	0.322829	2.68547	1.99025	0.0517169	0.999227	-4.40289
ENSMUSG00000037405	Icam1	protein_coding	MGI Symbol	2	intercellular adhesion molecule 1 [Source:MGI Symbol;Acc:MGI:96392]	-0.66441	-0.369438	-1.72972	0.0894835	0.999227	-4.40433
ENSMUSG00000029311	Hsd17b11	protein_coding	MGI Symbol	2	hydroxysteroid (17-beta) dehydrogenase 11 [Source:MGI Symbol;Acc:MGI:2149821]	-0.342284	1.96013	-1.9511	0.0563238	0.999227	-4.40476
ENSMUSG00000032609	Klhdc8b	protein_coding	MGI Symbol	15	kelch domain containing 8B [Source:MGI Symbol;Acc:MGI:1925517]	0.246427	4.11378	2.1307	0.0377582	0.999227	-4.40705
ENSMUSG00000038524	Fchsd1	protein_coding	MGI Symbol	10	FCH and double SH3 domains 1 [Source:MGI Symbol;Acc:MGI:2441771]	0.508558	0.819765	1.75746	0.084597	0.999227	-4.40716
ENSMUSG00000026958	Dpp7	protein_coding	MGI Symbol	10	dipeptidylpeptidase 7 [Source:MGI Symbol;Acc:MGI:1933213]	0.299113	3.5189	2.07363	0.0429743	0.999227	-4.40857
ENSMUSG00000107728	Gm38910	lincRNA	MGI Symbol	1	predicted gene, 38910 [Source:MGI Symbol;Acc:MGI:5621795]	-0.51807	0.873047	-1.82843	0.0730982	0.999227	-4.4098
ENSMUSG00000096981	Gm16845	antisense	MGI Symbol	2	predicted gene, 16845 [Source:MGI Symbol;Acc:MGI:4439769]	0.571809	0.325792	1.71264	0.0926059	0.999227	-4.41018
ENSMUSG00000115955	9530056E24Rik	TEC	MGI Symbol	1	RIKEN cDNA 9530056E24 gene [Source:MGI Symbol;Acc:MGI:2441750]	0.862215	-0.694544	1.59252	0.117198	0.999227	-4.41539
ENSMUSG00000074652	Myh7b	protein_coding	MGI Symbol	3	myosin, heavy chain 7B, cardiac muscle, beta [Source:MGI Symbol;Acc:MGI:3710243]	-0.394708	1.66492	-1.92396	0.0597215	0.999227	-4.41578
ENSMUSG00000035189	Ano4	protein_coding	MGI Symbol	12	anoctamin 4 [Source:MGI Symbol;Acc:MGI:2443344]	-0.252436	3.54027	-2.09606	0.0408533	0.999227	-4.41677
ENSMUSG00000036412	Arsi	protein_coding	MGI Symbol	1	arylsulfatase i [Source:MGI Symbol;Acc:MGI:2670959]	0.555278	0.0330592	1.69857	0.0952471	0.999227	-4.41861
ENSMUSG00000021342	Prl	protein_coding	MGI Symbol	4	prolactin [Source:MGI Symbol;Acc:MGI:97762]	2.52308	3.53972	1.89253	0.0638709	0.999227	-4.42078
ENSMUSG00000073125	Xlr3b	protein_coding	MGI Symbol	3	X-linked lymphocyte-regulated 3B [Source:MGI Symbol;Acc:MGI:109505]	-0.962587	1.40976	-1.94837	0.0566586	0.999227	-4.42101
ENSMUSG00000116694	Gm6440	processed_pseudogene	MGI Symbol	1	predicted gene 6440 [Source:MGI Symbol;Acc:MGI:3644482]	-0.407694	0.429804	-1.77933	0.0809025	0.999227	-4.42348
ENSMUSG00000027435	Cd93	protein_coding	MGI Symbol	1	CD93 antigen [Source:MGI Symbol;Acc:MGI:106664]	0.66659	0.229038	1.6773	0.099355	0.999227	-4.42416
ENSMUSG00000046822	Slc39a3	protein_coding	MGI Symbol	5	solute carrier family 39 (zinc transporter), member 3 [Source:MGI Symbol;Acc:MGI:2147269]	-0.23746	5.00268	-2.21231	0.0312636	0.999227	-4.42465
ENSMUSG00000084407	Gm14018	unprocessed_pseudogene	MGI Symbol	1	predicted gene 14018 [Source:MGI Symbol;Acc:MGI:3649456]	-0.393418	-0.0480711	-1.71694	0.0918124	0.999227	-4.42544
ENSMUSG00000008028	1700008O03Rik	protein_coding	MGI Symbol	5	RIKEN cDNA 1700008O03 gene [Source:MGI Symbol;Acc:MGI:1916599]	0.46193	0.521656	1.7261	0.0901388	0.999227	-4.42655
ENSMUSG00000001281	Itgb7	protein_coding	MGI Symbol	5	integrin beta 7 [Source:MGI Symbol;Acc:MGI:96616]	-0.644348	-0.482788	-1.69215	0.0964724	0.999227	-4.42939
ENSMUSG00000020101	Vsir	protein_coding	MGI Symbol	7	V-set immunoregulatory receptor [Source:MGI Symbol;Acc:MGI:1921298]	-0.252442	3.29786	-2.07011	0.0433156	0.999227	-4.431
ENSMUSG00000041375	Ccdc9	protein_coding	MGI Symbol	14	coiled-coil domain containing 9 [Source:MGI Symbol;Acc:MGI:1921443]	-0.332424	3.63078	-2.11348	0.0392701	0.999227	-4.43186
ENSMUSG00000082494	Gm13687	processed_pseudogene	MGI Symbol	1	predicted gene 13687 [Source:MGI Symbol;Acc:MGI:3651822]	0.305457	2.85751	1.99537	0.0511385	0.999227	-4.43219
ENSMUSG00000038859	Baiap2l1	protein_coding	MGI Symbol	2	BAI1-associated protein 2-like 1 [Source:MGI Symbol;Acc:MGI:1914148]	0.731531	-0.387084	1.61781	0.111623	0.999227	-4.43687
ENSMUSG00000022639	Dubr	lincRNA	MGI Symbol	5	Dppa2 upstream binding RNA [Source:MGI Symbol;Acc:MGI:1915440]	0.221934	3.48115	2.05131	0.0451789	0.999227	-4.43745
ENSMUSG00000108088	Gm44229	TEC	MGI Symbol	1	predicted gene, 44229 [Source:MGI Symbol;Acc:MGI:5690621]	0.858293	-0.908206	1.56898	0.122586	0.999227	-4.43906
ENSMUSG00000100980	Gm29100	antisense	MGI Symbol	1	predicted gene 29100 [Source:MGI Symbol;Acc:MGI:5579806]	0.626276	0.0560607	1.66098	0.102606	0.999227	-4.43937
ENSMUSG00000044937	Ttc41	protein_coding	MGI Symbol	6	tetratricopeptide repeat domain 41 [Source:MGI Symbol;Acc:MGI:2387653]	0.509609	0.275527	1.69869	0.0952234	0.999227	-4.4412
ENSMUSG00000020930	Ccdc103	protein_coding	MGI Symbol	2	coiled-coil domain containing 103 [Source:MGI Symbol;Acc:MGI:1920543]	0.27059	2.76098	1.98179	0.0526842	0.999227	-4.44227
ENSMUSG00000054619	Mettl7a1	protein_coding	MGI Symbol	8	methyltransferase like 7A1 [Source:MGI Symbol;Acc:MGI:1916523]	0.440218	4.16115	2.09324	0.0411148	0.999227	-4.44516
ENSMUSG00000020538	Srebf1	protein_coding	MGI Symbol	12	sterol regulatory element binding transcription factor 1 [Source:MGI Symbol;Acc:MGI:107606]	-0.277181	4.03845	-2.13125	0.0377103	0.999227	-4.4455
ENSMUSG00000066705	Fxyd6	protein_coding	MGI Symbol	3	FXYD domain-containing ion transport regulator 6 [Source:MGI Symbol;Acc:MGI:1890226]	0.271825	6.11229	2.23685	0.029514	0.999227	-4.44601
ENSMUSG00000031555	Adam9	protein_coding	MGI Symbol	5	a disintegrin and metallopeptidase domain 9 (meltrin gamma) [Source:MGI Symbol;Acc:MGI:105376]	-0.265016	3.92372	-2.12128	0.0385783	0.999227	-4.44667
ENSMUSG00000090363	Gm3512	protein_coding	MGI Symbol	2	predicted gene 3512 [Source:MGI Symbol;Acc:MGI:3781689]	-0.384363	-0.344143	-1.6914	0.0966161	0.999227	-4.4472
ENSMUSG00000079988	Gm11970	processed_pseudogene	MGI Symbol	1	predicted gene 11970 [Source:MGI Symbol;Acc:MGI:3650056]	0.419326	-0.0188309	1.66934	0.10093	0.999227	-4.45138
ENSMUSG00000022577	Ly6h	protein_coding	MGI Symbol	8	lymphocyte antigen 6 complex, locus H [Source:MGI Symbol;Acc:MGI:1346030]	-0.421044	5.99886	-2.24593	0.0288882	0.999227	-4.45199
ENSMUSG00000056316	Gm9996	TEC	MGI Symbol	1	predicted gene 9996 [Source:MGI Symbol;Acc:MGI:3642549]	-0.376394	0.579519	-1.79187	0.0788455	0.999227	-4.45281
ENSMUSG00000032425	Zfp949	protein_coding	MGI Symbol	5	zinc finger protein 949 [Source:MGI Symbol;Acc:MGI:1918890]	0.17927	4.55913	2.14229	0.0367687	0.999227	-4.45296
ENSMUSG00000045690	Wdr89	protein_coding	MGI Symbol	2	WD repeat domain 89 [Source:MGI Symbol;Acc:MGI:1919588]	0.267958	2.82667	1.98107	0.0527665	0.999227	-4.45932
ENSMUSG00000112096	A430103D13Rik	TEC	MGI Symbol	1	RIKEN cDNA A430103D13 gene [Source:MGI Symbol;Acc:MGI:1925025]	-0.337601	2.02427	-1.93264	0.058616	0.999227	-4.4611
ENSMUSG00000031145	Prickle3	protein_coding	MGI Symbol	5	prickle planar cell polarity protein 3 [Source:MGI Symbol;Acc:MGI:1859635]	-0.485019	-0.0968703	-1.71779	0.0916558	0.999227	-4.46148
ENSMUSG00000045629	Sh3tc2	protein_coding	MGI Symbol	4	SH3 domain and tetratricopeptide repeats 2 [Source:MGI Symbol;Acc:MGI:2444417]	-0.521155	0.430584	-1.75296	0.0853751	0.999227	-4.46342
ENSMUSG00000048387	Osr1	protein_coding	MGI Symbol	2	odd-skipped related transcription factor 1 [Source:MGI Symbol;Acc:MGI:1344424]	-0.469448	1.56391	-1.88386	0.0650583	0.999227	-4.46436
ENSMUSG00000071637	Cebpd	protein_coding	MGI Symbol	2	CCAAT/enhancer binding protein (C/EBP), delta [Source:MGI Symbol;Acc:MGI:103573]	-0.338097	3.35137	-2.06923	0.0434008	0.999227	-4.46729
ENSMUSG00000035576	L3mbtl1	protein_coding	MGI Symbol	7	L3MBTL1 histone methyl-lysine binding protein [Source:MGI Symbol;Acc:MGI:2676663]	0.515058	0.500376	1.67591	0.0996295	0.999227	-4.46958
ENSMUSG00000040938	Slc16a11	protein_coding	MGI Symbol	11	solute carrier family 16 (monocarboxylic acid transporters), member 11 [Source:MGI Symbol;Acc:MGI:2663709]	-0.378686	1.90182	-1.93848	0.0578821	0.999227	-4.47077
ENSMUSG00000040794	C1qtnf4	protein_coding	MGI Symbol	1	C1q and tumor necrosis factor related protein 4 [Source:MGI Symbol;Acc:MGI:1914695]	-0.30304	3.7486	-2.09957	0.0405303	0.999227	-4.47078
ENSMUSG00000051497	Kcnj16	protein_coding	MGI Symbol	6	potassium inwardly-rectifying channel, subfamily J, member 16 [Source:MGI Symbol;Acc:MGI:1314842]	0.397677	2.22236	1.88	0.0655932	0.999227	-4.47461
ENSMUSG00000020475	Pgam2	protein_coding	MGI Symbol	1	phosphoglycerate mutase 2 [Source:MGI Symbol;Acc:MGI:1933118]	0.344559	4.2948	2.098	0.040675	0.999227	-4.47624
ENSMUSG00000024677	Ms4a6b	protein_coding	MGI Symbol	5	membrane-spanning 4-domains, subfamily A, member 6B [Source:MGI Symbol;Acc:MGI:1917024]	-0.492438	-0.0911035	-1.68052	0.0987232	0.999227	-4.47947
ENSMUSG00000036862	Dchs1	protein_coding	MGI Symbol	3	dachsous cadherin related 1 [Source:MGI Symbol;Acc:MGI:2685011]	-0.330835	2.07265	-1.92346	0.0597853	0.999227	-4.47966
ENSMUSG00000028763	Hspg2	protein_coding	MGI Symbol	4	perlecan (heparan sulfate proteoglycan 2) [Source:MGI Symbol;Acc:MGI:96257]	-0.651001	-0.455037	-1.65557	0.103702	0.999227	-4.48337
ENSMUSG00000038415	Foxq1	protein_coding	MGI Symbol	1	forkhead box Q1 [Source:MGI Symbol;Acc:MGI:1298228]	-0.521568	-0.499418	-1.63448	0.108068	0.999227	-4.48778
ENSMUSG00000074506	Gm10705	processed_pseudogene	MGI Symbol	1	predicted gene 10705 [Source:MGI Symbol;Acc:MGI:3708678]	0.439972	-0.24998	1.62934	0.109154	0.999227	-4.48789
ENSMUSG00000104586	4921539H07Rik	lincRNA	MGI Symbol	2	RIKEN cDNA 4921539H07 gene [Source:MGI Symbol;Acc:MGI:1925506]	0.292697	4.96473	2.15021	0.0361065	0.999227	-4.49098
ENSMUSG00000053279	Aldh1a1	protein_coding	MGI Symbol	6	aldehyde dehydrogenase family 1, subfamily A1 [Source:MGI Symbol;Acc:MGI:1353450]	0.307224	6.14025	2.21541	0.0310376	0.999227	-4.4923
ENSMUSG00000047139	Cd24a	protein_coding	MGI Symbol	3	CD24a antigen [Source:MGI Symbol;Acc:MGI:88323]	0.290784	2.88196	1.95729	0.0555733	0.999227	-4.49348
ENSMUSG00000066477	Gm16551	processed_transcript	MGI Symbol	5	predicted gene 16551 [Source:MGI Symbol;Acc:MGI:4414971]	-0.571122	-0.151962	-1.737	0.0881793	0.999227	-4.4941
ENSMUSG00000029343	Crybb1	protein_coding	MGI Symbol	3	crystallin, beta B1 [Source:MGI Symbol;Acc:MGI:104992]	0.42556	2.86275	1.94784	0.0567228	0.999227	-4.49709
ENSMUSG00000056508	1700001K19Rik	protein_coding	MGI Symbol	2	RIKEN cDNA 1700001K19 gene [Source:MGI Symbol;Acc:MGI:1913573]	-0.422942	-0.198741	-1.67571	0.0996679	0.999227	-4.49773
ENSMUSG00000097536	2610037D02Rik	lincRNA	MGI Symbol	2	RIKEN cDNA 2610037D02 gene [Source:MGI Symbol;Acc:MGI:1917290]	0.467735	0.063452	1.6142	0.112405	0.999227	-4.49904
ENSMUSG00000042626	Shc1	protein_coding	MGI Symbol	10	src homology 2 domain-containing transforming protein C1 [Source:MGI Symbol;Acc:MGI:98296]	-0.277983	2.6315	-1.96884	0.0541946	0.999227	-4.49915
ENSMUSG00000085558	4930412C18Rik	processed_transcript	MGI Symbol	5	RIKEN cDNA 4930412C18 gene [Source:MGI Symbol;Acc:MGI:2443490]	0.549586	0.858916	1.72456	0.0904175	0.999227	-4.50185
ENSMUSG00000033276	Stk36	protein_coding	MGI Symbol	9	serine/threonine kinase 36 [Source:MGI Symbol;Acc:MGI:1920831]	-0.489904	0.146252	-1.69827	0.0953045	0.999227	-4.50411
ENSMUSG00000034771	Tle2	protein_coding	MGI Symbol	16	transducin-like enhancer of split 2 [Source:MGI Symbol;Acc:MGI:104635]	-0.402865	2.04856	-1.91827	0.0604551	0.999227	-4.50433
ENSMUSG00000024256	Adcyap1	protein_coding	MGI Symbol	5	adenylate cyclase activating polypeptide 1 [Source:MGI Symbol;Acc:MGI:105094]	0.66698	0.450315	1.66685	0.101425	0.999227	-4.50647
ENSMUSG00000000782	Tcf7	protein_coding	MGI Symbol	3	transcription factor 7, T cell specific [Source:MGI Symbol;Acc:MGI:98507]	-0.434571	-0.0534368	-1.68012	0.0988028	0.999227	-4.50659
ENSMUSG00000096361	Gm5814	processed_pseudogene	MGI Symbol	1	predicted pseudogene 5814 [Source:MGI Symbol;Acc:MGI:3648910]	-0.639312	1.56031	-1.88684	0.0646486	0.999227	-4.50822
ENSMUSG00000110235	Gm5086	lincRNA	MGI Symbol	3	predicted gene 5086 [Source:MGI Symbol;Acc:MGI:3644417]	0.533394	0.455402	1.65473	0.103874	0.999227	-4.50932
ENSMUSG00000107023	Gm42715	protein_coding	MGI Symbol	2	predicted gene 42715 [Source:MGI Symbol;Acc:MGI:5662852]	0.356434	2.4861	1.90825	0.0617655	0.999227	-4.50963
ENSMUSG00000112395	Gm7198	processed_pseudogene	MGI Symbol	1	predicted gene 7198 [Source:MGI Symbol;Acc:MGI:3779696]	0.327652	0.684246	1.68763	0.0973414	0.999227	-4.51479
ENSMUSG00000048108	Tmem72	protein_coding	MGI Symbol	2	transmembrane protein 72 [Source:MGI Symbol;Acc:MGI:2442707]	-1.68275	-1.68993	-1.58443	0.119027	0.999227	-4.51536
ENSMUSG00000067215	Usp51	protein_coding	MGI Symbol	1	ubiquitin specific protease 51 [Source:MGI Symbol;Acc:MGI:3588217]	-0.516838	0.115529	-1.6931	0.0962899	0.999227	-4.5166
ENSMUSG00000023959	Clic5	protein_coding	MGI Symbol	3	chloride intracellular channel 5 [Source:MGI Symbol;Acc:MGI:1917912]	0.495569	0.502355	1.66274	0.10225	0.999227	-4.51867
ENSMUSG00000106208	Gm4734	processed_pseudogene	MGI Symbol	1	predicted gene 4734 [Source:MGI Symbol;Acc:MGI:3782914]	0.340454	0.936764	1.72807	0.089781	0.999227	-4.51957
ENSMUSG00000118506	1700094D03Rik	protein_coding	MGI Symbol	2	RIKEN cDNA 1700094D03 gene [Source:MGI Symbol;Acc:MGI:1920795]	0.49341	0.569504	1.6631	0.102178	0.999227	-4.52561
ENSMUSG00000047502	Mroh7	protein_coding	MGI Symbol	7	maestro heat-like repeat family member 7 [Source:MGI Symbol;Acc:MGI:2685873]	0.454994	-0.148473	1.59	0.117764	0.999227	-4.52698
ENSMUSG00000017485	Top2b	protein_coding	MGI Symbol	8	topoisomerase (DNA) II beta [Source:MGI Symbol;Acc:MGI:98791]	-0.136561	5.81883	-2.19332	0.0326794	0.999227	-4.52989
ENSMUSG00000024824	Rad9a	protein_coding	MGI Symbol	8	RAD9 checkpoint clamp component A [Source:MGI Symbol;Acc:MGI:1328356]	0.235071	3.37832	1.99749	0.0509016	0.999227	-4.53185
ENSMUSG00000045795	Whamm	protein_coding	MGI Symbol	3	WAS protein homolog associated with actin, golgi membranes and microtubules [Source:MGI Symbol;Acc:MGI:2142282]	-0.285437	2.3724	-1.92745	0.0592739	0.999227	-4.53188
ENSMUSG00000055026	Gabrg3	protein_coding	MGI Symbol	3	gamma-aminobutyric acid (GABA) A receptor, subunit gamma 3 [Source:MGI Symbol;Acc:MGI:95624]	-0.283913	3.1999	-2.0065	0.0499019	0.999227	-4.53244
ENSMUSG00000044150	Bclaf3	protein_coding	MGI Symbol	6	Bclaf1 and Thrap3 family member 3 [Source:MGI Symbol;Acc:MGI:2685992]	-0.221819	3.16411	-2.00719	0.0498257	0.999227	-4.533
ENSMUSG00000100706	Gm19744	processed_transcript	MGI Symbol	6	predicted gene, 19744 [Source:MGI Symbol;Acc:MGI:5011929]	-0.383575	0.987135	-1.77223	0.0820864	0.999227	-4.53339
ENSMUSG00000021572	Cep72	protein_coding	MGI Symbol	7	centrosomal protein 72 [Source:MGI Symbol;Acc:MGI:1921720]	0.388196	1.16847	1.72548	0.0902499	0.999227	-4.53489
ENSMUSG00000036499	Eea1	protein_coding	MGI Symbol	5	early endosome antigen 1 [Source:MGI Symbol;Acc:MGI:2442192]	0.154761	5.51065	2.16642	0.0347822	0.999227	-4.5375
ENSMUSG00000027368	Dusp2	protein_coding	MGI Symbol	2	dual specificity phosphatase 2 [Source:MGI Symbol;Acc:MGI:101911]	-0.452018	0.617356	-1.73946	0.0877417	0.999227	-4.53829
ENSMUSG00000032572	Col6a4	protein_coding	MGI Symbol	4	collagen, type VI, alpha 4 [Source:MGI Symbol;Acc:MGI:1915803]	0.532534	-0.26872	1.56176	0.124278	0.999227	-4.53915
ENSMUSG00000026950	Neb	protein_coding	MGI Symbol	14	nebulin [Source:MGI Symbol;Acc:MGI:97292]	0.433993	0.506327	1.63498	0.107962	0.999227	-4.53923
ENSMUSG00000062944	9130023H24Rik	protein_coding	MGI Symbol	1	RIKEN cDNA 9130023H24 gene [Source:MGI Symbol;Acc:MGI:2442738]	0.26675	2.58345	1.91217	0.0612501	0.999227	-4.54029
ENSMUSG00000086815	3110082J24Rik	protein_coding	MGI Symbol	2	RIKEN cDNA 3110082J24 gene [Source:MGI Symbol;Acc:MGI:3641994]	0.465673	-0.417998	1.57329	0.121586	0.999227	-4.54055
ENSMUSG00000031938	4931406C07Rik	protein_coding	MGI Symbol	9	RIKEN cDNA 4931406C07 gene [Source:MGI Symbol;Acc:MGI:1918234]	-0.176387	3.81947	-2.05877	0.0444307	0.999227	-4.54117
ENSMUSG00000033508	Asprv1	protein_coding	MGI Symbol	1	aspartic peptidase, retroviral-like 1 [Source:MGI Symbol;Acc:MGI:1915105]	-0.526306	-0.414965	-1.62636	0.109787	0.999227	-4.54188
ENSMUSG00000012126	Ubxn11	protein_coding	MGI Symbol	12	UBX domain protein 11 [Source:MGI Symbol;Acc:MGI:1914836]	0.274334	3.9327	2.02183	0.0482405	0.999227	-4.54215
ENSMUSG00000054418	2900041M22Rik	processed_transcript	MGI Symbol	1	RIKEN cDNA 2900041M22 gene [Source:MGI Symbol;Acc:MGI:1925653]	0.382293	1.45716	1.75054	0.0857949	0.999227	-4.54444
ENSMUSG00000039244	E130309D02Rik	protein_coding	MGI Symbol	4	RIKEN cDNA E130309D02 gene [Source:MGI Symbol;Acc:MGI:2442621]	-0.209935	3.72507	-2.04997	0.0453136	0.999227	-4.54448
ENSMUSG00000097727	F630040K05Rik	lincRNA	MGI Symbol	3	RIKEN cDNA F630040K05 gene [Source:MGI Symbol;Acc:MGI:4437734]	0.63797	-0.429863	1.52153	0.134054	0.999227	-4.54556
ENSMUSG00000035152	Ap2b1	protein_coding	MGI Symbol	7	adaptor-related protein complex 2, beta 1 subunit [Source:MGI Symbol;Acc:MGI:1919020]	0.21179	7.48314	2.21508	0.0310615	0.999227	-4.54708
ENSMUSG00000027887	Sypl2	protein_coding	MGI Symbol	2	synaptophysin-like 2 [Source:MGI Symbol;Acc:MGI:1328311]	-0.403783	0.627192	-1.72629	0.0901036	0.999227	-4.5471
ENSMUSG00000019942	Cdk1	protein_coding	MGI Symbol	7	cyclin-dependent kinase 1 [Source:MGI Symbol;Acc:MGI:88351]	0.661873	-0.433924	1.50856	0.137331	0.999227	-4.55018
ENSMUSG00000001942	Siae	protein_coding	MGI Symbol	7	sialic acid acetylesterase [Source:MGI Symbol;Acc:MGI:104803]	-0.209856	3.60486	-2.03391	0.0469647	0.999227	-4.55229
ENSMUSG00000063364	3300002I08Rik	protein_coding	MGI Symbol	4	RIKEN cDNA 3300002I08 gene [Source:MGI Symbol;Acc:MGI:1916527]	0.417927	0.540806	1.63927	0.107064	0.999227	-4.55546
ENSMUSG00000035105	Egln3	protein_coding	MGI Symbol	1	egl-9 family hypoxia-inducible factor 3 [Source:MGI Symbol;Acc:MGI:1932288]	-0.389719	0.867453	-1.74145	0.0873896	0.999227	-4.55741
ENSMUSG00000055485	Soga1	protein_coding	MGI Symbol	3	suppressor of glucose, autophagy associated 1 [Source:MGI Symbol;Acc:MGI:2444575]	-0.303374	2.4862	-1.93048	0.058889	0.999227	-4.55797
ENSMUSG00000091898	Tnnc1	protein_coding	MGI Symbol	3	troponin C, cardiac/slow skeletal [Source:MGI Symbol;Acc:MGI:98779]	0.454099	0.316377	1.60283	0.114899	0.999227	-4.56164
ENSMUSG00000066245	Gm10156	processed_pseudogene	MGI Symbol	1	predicted gene 10156 [Source:MGI Symbol;Acc:MGI:3642344]	-0.411432	0.930861	-1.76511	0.0832897	0.999227	-4.56268
ENSMUSG00000082226	Gm715	processed_pseudogene	MGI Symbol	1	predicted gene 715 [Source:MGI Symbol;Acc:MGI:2685561]	-0.410137	0.0373928	-1.65208	0.104413	0.999227	-4.56381
ENSMUSG00000001604	Tcea3	protein_coding	MGI Symbol	3	transcription elongation factor A (SII), 3 [Source:MGI Symbol;Acc:MGI:1196908]	-0.875617	0.130981	-1.6821	0.0984165	0.999227	-4.56413
ENSMUSG00000040084	Bub1b	protein_coding	MGI Symbol	4	BUB1B, mitotic checkpoint serine/threonine kinase [Source:MGI Symbol;Acc:MGI:1333889]	0.487871	0.903602	1.65064	0.104709	0.999227	-4.56456
ENSMUSG00000051920	Rspo2	protein_coding	MGI Symbol	3	R-spondin 2 [Source:MGI Symbol;Acc:MGI:1922667]	-0.297741	2.61714	-1.93117	0.0588018	0.999227	-4.56487
ENSMUSG00000085255	Taco1os	antisense	MGI Symbol	1	translational activator of mitochondrially encoded cytochrome c oxidase I, opposite strand [Source:MGI Symbol;Acc:MGI:1915441]	0.376153	0.383144	1.62948	0.109124	0.999227	-4.5649
ENSMUSG00000029780	Nt5c3	protein_coding	MGI Symbol	9	5prime-nucleotidase, cytosolic III [Source:MGI Symbol;Acc:MGI:1927186]	-0.217553	5.22051	-2.15175	0.035979	0.999227	-4.56695
ENSMUSG00000086693	A730081D07Rik	antisense	MGI Symbol	1	RIKEN cDNA A730081D07 gene [Source:MGI Symbol;Acc:MGI:2441825]	0.331363	1.64622	1.78202	0.0804579	0.999227	-4.56747
ENSMUSG00000096726	Gm5558	processed_pseudogene	MGI Symbol	1	predicted gene 5558 [Source:MGI Symbol;Acc:MGI:3644616]	0.281624	2.16275	1.8301	0.0728444	0.999227	-4.56824
ENSMUSG00000096917	2500002B13Rik	processed_transcript	MGI Symbol	2	RIKEN cDNA 2500002B13 gene [Source:MGI Symbol;Acc:MGI:1925603]	0.34253	1.0032	1.68453	0.0979434	0.999227	-4.56903
ENSMUSG00000037295	Ldlrap1	protein_coding	MGI Symbol	3	low density lipoprotein receptor adaptor protein 1 [Source:MGI Symbol;Acc:MGI:2140175]	-0.437412	1.30409	-1.79386	0.0785232	0.999227	-4.56911
ENSMUSG00000089883	Gm3355	processed_pseudogene	MGI Symbol	1	predicted gene 3355 [Source:MGI Symbol;Acc:MGI:3781533]	-0.427114	-0.271178	-1.61277	0.112716	0.999227	-4.56992
ENSMUSG00000031446	Cul4a	protein_coding	MGI Symbol	8	cullin 4A [Source:MGI Symbol;Acc:MGI:1914487]	-0.212798	5.64041	-2.16859	0.0346084	0.999227	-4.57211
ENSMUSG00000074479	Rtraf-ps	processed_pseudogene	MGI Symbol	1	RNA transcription, translation and transport factor, pseudogene [Source:MGI Symbol;Acc:MGI:3642446]	-0.360662	1.4126	-1.81986	0.0744136	0.999227	-4.57274
ENSMUSG00000048347	Pcdhb18	protein_coding	MGI Symbol	1	protocadherin beta 18 [Source:MGI Symbol;Acc:MGI:2136756]	-0.385206	1.03965	-1.76559	0.0832069	0.999227	-4.57431
ENSMUSG00000057722	Lepr	protein_coding	MGI Symbol	7	leptin receptor [Source:MGI Symbol;Acc:MGI:104993]	-0.730164	-0.792097	-1.57325	0.121594	0.999227	-4.57722
ENSMUSG00000041957	Pkp2	protein_coding	MGI Symbol	3	plakophilin 2 [Source:MGI Symbol;Acc:MGI:1914701]	-0.25155	4.45914	-2.09423	0.0410228	0.999227	-4.57747
ENSMUSG00000052605	Isoc2b	protein_coding	MGI Symbol	5	isochorismatase domain containing 2b [Source:MGI Symbol;Acc:MGI:1914691]	0.211727	3.98643	2.02707	0.0476833	0.999227	-4.58264
ENSMUSG00000083454	Gm13226	processed_pseudogene	MGI Symbol	1	predicted gene 13226 [Source:MGI Symbol;Acc:MGI:3651282]	-0.308588	1.55695	-1.81815	0.0746771	0.999227	-4.58317
ENSMUSG00000055323	Gm9967	processed_transcript	MGI Symbol	3	predicted gene 9967 [Source:MGI Symbol;Acc:MGI:3704300]	0.380932	0.215446	1.61365	0.112525	0.999227	-4.58333
ENSMUSG00000117994	Gm5820	lincRNA	MGI Symbol	3	predicted gene 5820 [Source:MGI Symbol;Acc:MGI:3646292]	0.415902	-0.093152	1.5644	0.123658	0.999227	-4.58357
ENSMUSG00000056215	Lrguk	protein_coding	MGI Symbol	4	leucine-rich repeats and guanylate kinase domain containing [Source:MGI Symbol;Acc:MGI:1921604]	-0.437618	0.41642	-1.67218	0.100366	0.999227	-4.58707
ENSMUSG00000021891	Mettl6	protein_coding	MGI Symbol	10	methyltransferase like 6 [Source:MGI Symbol;Acc:MGI:1914261]	0.162572	5.1815	2.11866	0.0388096	0.999227	-4.59131
ENSMUSG00000097393	D030068K23Rik	lincRNA	MGI Symbol	4	RIKEN cDNA D030068K23 gene [Source:MGI Symbol;Acc:MGI:3037424]	0.391089	0.996396	1.66534	0.101728	0.999227	-4.59436
ENSMUSG00000045404	Kcnk13	protein_coding	MGI Symbol	4	potassium channel, subfamily K, member 13 [Source:MGI Symbol;Acc:MGI:2384976]	-0.451084	1.80911	-1.84653	0.0703856	0.999227	-4.59511
ENSMUSG00000036362	P2ry13	protein_coding	MGI Symbol	1	purinergic receptor P2Y, G-protein coupled 13 [Source:MGI Symbol;Acc:MGI:1921441]	-0.28233	3.07805	-1.96942	0.0541263	0.999227	-4.59529
ENSMUSG00000029165	Agbl5	protein_coding	MGI Symbol	18	ATP/GTP binding protein-like 5 [Source:MGI Symbol;Acc:MGI:2441745]	0.347105	1.34556	1.71468	0.0922296	0.999227	-4.59923
ENSMUSG00000111160	Gm48855	lincRNA	MGI Symbol	1	predicted gene, 48855 [Source:MGI Symbol;Acc:MGI:6098594]	0.839678	0.25996	1.52085	0.134225	0.999227	-4.60206
ENSMUSG00000097924	A730020E08Rik	bidirectional_promoter_lncRNA	MGI Symbol	3	RIKEN cDNA A730020E08 gene [Source:MGI Symbol;Acc:MGI:2444999]	0.269082	2.56225	1.87067	0.0668998	0.999227	-4.60289
ENSMUSG00000025602	Zfp202	protein_coding	MGI Symbol	3	zinc finger protein 202 [Source:MGI Symbol;Acc:MGI:1933401]	0.398212	1.24915	1.69611	0.0957155	0.999227	-4.60887
ENSMUSG00000008999	Bmp7	protein_coding	MGI Symbol	2	bone morphogenetic protein 7 [Source:MGI Symbol;Acc:MGI:103302]	-0.506306	1.38309	-1.78234	0.0804046	0.999227	-4.61014
ENSMUSG00000022335	Zfat	protein_coding	MGI Symbol	5	zinc finger and AT hook domain containing [Source:MGI Symbol;Acc:MGI:2681865]	0.296856	2.01862	1.78858	0.0793823	0.999227	-4.61168
ENSMUSG00000030669	Calca	protein_coding	MGI Symbol	7	calcitonin/calcitonin-related polypeptide, alpha [Source:MGI Symbol;Acc:MGI:2151253]	0.51127	0.157207	1.55216	0.126557	0.999227	-4.61279
ENSMUSG00000002250	Ppard	protein_coding	MGI Symbol	9	peroxisome proliferator activator receptor delta [Source:MGI Symbol;Acc:MGI:101884]	0.304144	2.41288	1.84194	0.0710656	0.999227	-4.61345
ENSMUSG00000030708	Dnajb13	protein_coding	MGI Symbol	4	DnaJ heat shock protein family (Hsp40) member B13 [Source:MGI Symbol;Acc:MGI:1916637]	-0.53493	-0.330801	-1.59174	0.117374	0.999227	-4.6169
ENSMUSG00000083044	Gm12416	processed_pseudogene	MGI Symbol	1	predicted gene 12416 [Source:MGI Symbol;Acc:MGI:3650588]	0.37888	0.326127	1.58166	0.119661	0.999227	-4.61825
ENSMUSG00000033088	Triobp	protein_coding	MGI Symbol	12	TRIO and F-actin binding protein [Source:MGI Symbol;Acc:MGI:1349410]	-0.361579	1.82397	-1.82975	0.0728979	0.999227	-4.61918
ENSMUSG00000042992	Borcs5	protein_coding	MGI Symbol	5	BLOC-1 related complex subunit 5 [Source:MGI Symbol;Acc:MGI:1915024]	-0.191687	6.00389	-2.15717	0.0355323	0.999227	-4.61946
ENSMUSG00000029925	Tbxas1	protein_coding	MGI Symbol	7	thromboxane A synthase 1, platelet [Source:MGI Symbol;Acc:MGI:98497]	0.476607	0.951358	1.63872	0.107177	0.999227	-4.61949
ENSMUSG00000023999	Kif6	protein_coding	MGI Symbol	7	kinesin family member 6 [Source:MGI Symbol;Acc:MGI:1098238]	0.347287	1.64552	1.7271	0.0899576	0.999227	-4.61961
ENSMUSG00000052783	Grk4	protein_coding	MGI Symbol	5	G protein-coupled receptor kinase 4 [Source:MGI Symbol;Acc:MGI:95801]	-0.312442	1.55019	-1.78626	0.0797604	0.999227	-4.61963
ENSMUSG00000036890	Gtdc1	protein_coding	MGI Symbol	13	glycosyltransferase-like domain containing 1 [Source:MGI Symbol;Acc:MGI:2444269]	-0.134883	5.32859	-2.12661	0.0381128	0.999227	-4.61968
ENSMUSG00000025608	Podxl	protein_coding	MGI Symbol	2	podocalyxin-like [Source:MGI Symbol;Acc:MGI:1351317]	-0.359488	1.54636	-1.78752	0.0795544	0.999227	-4.6204
ENSMUSG00000044122	Proca1	protein_coding	MGI Symbol	5	protein interacting with cyclin A1 [Source:MGI Symbol;Acc:MGI:1918274]	0.349968	1.71506	1.73606	0.0883459	0.999227	-4.62081
ENSMUSG00000112300	Gm47976	TEC	MGI Symbol	1	predicted gene, 47976 [Source:MGI Symbol;Acc:MGI:6097260]	0.659913	-0.60932	1.43104	0.158271	0.999227	-4.62163
ENSMUSG00000024697	Gna14	protein_coding	MGI Symbol	2	guanine nucleotide binding protein, alpha 14 [Source:MGI Symbol;Acc:MGI:95769]	0.387034	1.09784	1.6683	0.101136	0.999227	-4.622
ENSMUSG00000042644	Itpr3	protein_coding	MGI Symbol	2	inositol 1,4,5-triphosphate receptor 3 [Source:MGI Symbol;Acc:MGI:96624]	-0.530684	0.15473	-1.60212	0.115055	0.999227	-4.62245
ENSMUSG00000038347	Tcte2	protein_coding	MGI Symbol	10	t-complex-associated testis expressed 2 [Source:MGI Symbol;Acc:MGI:98641]	0.450494	0.530586	1.58958	0.117861	0.999227	-4.62295
ENSMUSG00000078923	Ube2v1	protein_coding	MGI Symbol	7	ubiquitin-conjugating enzyme E2 variant 1 [Source:MGI Symbol;Acc:MGI:1913839]	-0.369396	-0.0794162	-1.58051	0.119924	0.999227	-4.62372
ENSMUSG00000070031	Sp140	protein_coding	MGI Symbol	6	Sp140 nuclear body protein [Source:MGI Symbol;Acc:MGI:3702467]	0.50845	-0.365587	1.48515	0.143411	0.999227	-4.62479
ENSMUSG00000074771	Ankef1	protein_coding	MGI Symbol	10	ankyrin repeat and EF-hand domain containing 1 [Source:MGI Symbol;Acc:MGI:2441685]	0.613184	-0.517241	1.44164	0.155271	0.999227	-4.62511
ENSMUSG00000034227	Foxj1	protein_coding	MGI Symbol	1	forkhead box J1 [Source:MGI Symbol;Acc:MGI:1347474]	-0.449043	1.59119	-1.80901	0.0761055	0.999227	-4.62819
ENSMUSG00000050926	Dcaf12l2	protein_coding	MGI Symbol	1	DDB1 and CUL4 associated factor 12-like 2 [Source:MGI Symbol;Acc:MGI:2445178]	-0.325977	1.19427	-1.74798	0.086241	0.999227	-4.63029
ENSMUSG00000117771	Gm25432	processed_pseudogene	MGI Symbol	1	predicted gene, 25432 [Source:MGI Symbol;Acc:MGI:5455209]	0.333177	0.569157	1.59779	0.116017	0.999227	-4.63128
ENSMUSG00000082872	Gm15773	processed_pseudogene	MGI Symbol	1	predicted gene 15773 [Source:MGI Symbol;Acc:MGI:3783214]	-0.329534	0.854024	-1.70433	0.0941595	0.999227	-4.63177
ENSMUSG00000039523	Cep104	protein_coding	MGI Symbol	3	centrosomal protein 104 [Source:MGI Symbol;Acc:MGI:2687282]	-0.193718	4.28308	-2.04942	0.0453693	0.999227	-4.63452
ENSMUSG00000023019	Gpd1	protein_coding	MGI Symbol	3	glycerol-3-phosphate dehydrogenase 1 (soluble) [Source:MGI Symbol;Acc:MGI:95679]	0.208847	7.29869	2.17034	0.0344691	0.999227	-4.63462
ENSMUSG00000087344	Gm15627	lincRNA	MGI Symbol	1	predicted gene 15627 [Source:MGI Symbol;Acc:MGI:3783071]	-0.446443	-0.087223	-1.58625	0.118614	0.999227	-4.63654
ENSMUSG00000034919	Ttc22	protein_coding	MGI Symbol	2	tetratricopeptide repeat domain 22 [Source:MGI Symbol;Acc:MGI:3045307]	0.564768	-0.397159	1.47156	0.147036	0.999227	-4.63727
ENSMUSG00000026771	Spopl	protein_coding	MGI Symbol	6	speckle-type BTB/POZ protein-like [Source:MGI Symbol;Acc:MGI:1924107]	-0.193422	3.53247	-1.97938	0.0529621	0.999227	-4.63817
ENSMUSG00000103181	A330069K06Rik	lincRNA	MGI Symbol	1	RIKEN cDNA A330069K06 gene [Source:MGI Symbol;Acc:MGI:2685464]	0.566997	-0.0788033	1.48312	0.143947	0.999227	-4.6391
ENSMUSG00000028243	Ubxn2b	protein_coding	MGI Symbol	1	UBX domain protein 2B [Source:MGI Symbol;Acc:MGI:1915303]	0.180803	6.03325	2.13832	0.0371054	0.999227	-4.64004
ENSMUSG00000001435	Col18a1	protein_coding	MGI Symbol	5	collagen, type XVIII, alpha 1 [Source:MGI Symbol;Acc:MGI:88451]	-0.656851	-0.412467	-1.5349	0.130739	0.999227	-4.64118
ENSMUSG00000030555	Ttc23	protein_coding	MGI Symbol	14	tetratricopeptide repeat domain 23 [Source:MGI Symbol;Acc:MGI:1914259]	0.350899	1.30244	1.6895	0.0969808	0.999227	-4.64147
ENSMUSG00000106320	Gm42992	TEC	MGI Symbol	1	predicted gene 42992 [Source:MGI Symbol;Acc:MGI:5663129]	0.751287	1.17432	1.62718	0.109613	0.999227	-4.64372
ENSMUSG00000074715	Ccl28	protein_coding	MGI Symbol	2	chemokine (C-C motif) ligand 28 [Source:MGI Symbol;Acc:MGI:1861731]	0.611534	0.80327	1.58902	0.117987	0.999227	-4.64411
ENSMUSG00000026095	Asnsd1	protein_coding	MGI Symbol	5	asparagine synthetase domain containing 1 [Source:MGI Symbol;Acc:MGI:1917646]	-0.281825	1.85745	-1.80804	0.0762586	0.999227	-4.64491
ENSMUSG00000089633	A230009B12Rik	antisense	MGI Symbol	4	RIKEN cDNA A230009B12 gene [Source:MGI Symbol;Acc:MGI:2442666]	-0.342865	1.74857	-1.79142	0.0789185	0.999227	-4.64609
ENSMUSG00000039208	Metrnl	protein_coding	MGI Symbol	3	meteorin, glial cell differentiation regulator-like [Source:MGI Symbol;Acc:MGI:2384806]	-0.292177	1.85923	-1.79406	0.0784915	0.999227	-4.6478
ENSMUSG00000029121	Crmp1	protein_coding	MGI Symbol	10	collapsin response mediator protein 1 [Source:MGI Symbol;Acc:MGI:107793]	-0.118869	7.7014	-2.17029	0.0344726	0.999227	-4.64908
ENSMUSG00000032360	Hcrtr2	protein_coding	MGI Symbol	3	hypocretin (orexin) receptor 2 [Source:MGI Symbol;Acc:MGI:2680765]	-0.417535	0.572468	-1.63728	0.107479	0.999227	-4.65071
ENSMUSG00000008958	Vps72	protein_coding	MGI Symbol	5	vacuolar protein sorting 72 [Source:MGI Symbol;Acc:MGI:1202305]	-0.227062	5.79263	-2.1365	0.0372604	0.999227	-4.65083
ENSMUSG00000056313	Tcim	protein_coding	MGI Symbol	1	transcriptional and immune response regulator [Source:MGI Symbol;Acc:MGI:1916318]	-0.547243	-0.588053	-1.50043	0.139419	0.999227	-4.65263
ENSMUSG00000086171	Pcsk2os1	antisense	MGI Symbol	2	proprotein convertase subtilisin/kexin type 2, opposite strand 1 [Source:MGI Symbol;Acc:MGI:3605632]	-0.273105	2.28944	-1.84229	0.0710128	0.999227	-4.6534
ENSMUSG00000058498	Rnf207	protein_coding	MGI Symbol	12	ring finger protein 207 [Source:MGI Symbol;Acc:MGI:2684989]	-0.43779	1.19296	-1.73386	0.0887399	0.999227	-4.65398
ENSMUSG00000031167	Rbm3	protein_coding	MGI Symbol	11	RNA binding motif (RNP1, RRM) protein 3 [Source:MGI Symbol;Acc:MGI:1099460]	-0.304048	7.00861	-2.16204	0.0351361	0.999227	-4.65545
ENSMUSG00000022543	4930451G09Rik	transcribed_unitary_pseudogene	MGI Symbol	5	RIKEN cDNA 4930451G09 gene [Source:MGI Symbol;Acc:MGI:1921934]	0.384325	1.72794	1.71584	0.0920157	0.999227	-4.65654
ENSMUSG00000078234	Klhdc7a	protein_coding	MGI Symbol	1	kelch domain containing 7A [Source:MGI Symbol;Acc:MGI:2444612]	0.441122	1.92411	1.74524	0.0867218	0.999227	-4.65904
ENSMUSG00000117939	Gm9067	processed_pseudogene	MGI Symbol	1	predicted gene 9067 [Source:MGI Symbol;Acc:MGI:3644658]	0.303262	1.99164	1.76888	0.0826509	0.999227	-4.66012
ENSMUSG00000020495	Smg8	protein_coding	MGI Symbol	2	smg-8 homolog, nonsense mediated mRNA decay factor (C. elegans) [Source:MGI Symbol;Acc:MGI:1921383]	-0.193217	3.50676	-1.96904	0.0541711	0.999227	-4.66166
ENSMUSG00000024325	Ring1	protein_coding	MGI Symbol	3	ring finger protein 1 [Source:MGI Symbol;Acc:MGI:1101770]	-0.367086	2.85995	-1.91696	0.0606251	0.999227	-4.66187
ENSMUSG00000079428	Tceal7	protein_coding	MGI Symbol	2	transcription elongation factor A (SII)-like 7 [Source:MGI Symbol;Acc:MGI:1915746]	0.524456	-0.279561	1.4519	0.152405	0.999227	-4.66245
ENSMUSG00000029049	Morn1	protein_coding	MGI Symbol	8	MORN repeat containing 1 [Source:MGI Symbol;Acc:MGI:1924116]	0.319612	2.4889	1.81386	0.0753457	0.999227	-4.66258
ENSMUSG00000028373	Astn2	protein_coding	MGI Symbol	2	astrotactin 2 [Source:MGI Symbol;Acc:MGI:1889277]	-0.543455	0.399575	-1.62996	0.109022	0.999227	-4.66463
ENSMUSG00000047115	Fam221a	protein_coding	MGI Symbol	6	family with sequence similarity 221, member A [Source:MGI Symbol;Acc:MGI:2442161]	0.479428	0.572899	1.55611	0.125616	0.999227	-4.66641
ENSMUSG00000031230	Fgf16	protein_coding	MGI Symbol	1	fibroblast growth factor 16 [Source:MGI Symbol;Acc:MGI:1931627]	-0.311908	0.973495	-1.66256	0.102286	0.999227	-4.6683
ENSMUSG00000079391	Gm2974	protein_coding	MGI Symbol	2	predicted gene 2974 [Source:MGI Symbol;Acc:MGI:3781152]	-0.42573	0.132472	-1.59963	0.115607	0.999227	-4.66896
ENSMUSG00000109875	Gm45456	processed_pseudogene	MGI Symbol	1	predicted gene 45456 [Source:MGI Symbol;Acc:MGI:5791292]	-0.337941	0.313829	-1.59857	0.115845	0.999227	-4.67042
ENSMUSG00000028270	Gbp2	protein_coding	MGI Symbol	2	guanylate binding protein 2 [Source:MGI Symbol;Acc:MGI:102772]	-0.529911	0.287745	-1.58825	0.118162	0.999227	-4.67107
ENSMUSG00000107553	Gm44266	TEC	MGI Symbol	1	predicted gene, 44266 [Source:MGI Symbol;Acc:MGI:5690658]	0.53911	-0.367146	1.44312	0.154853	0.999227	-4.67115
ENSMUSG00000029598	Plbd2	protein_coding	MGI Symbol	3	phospholipase B domain containing 2 [Source:MGI Symbol;Acc:MGI:1919022]	-0.298957	4.82482	-2.0744	0.0428994	0.999227	-4.67216
ENSMUSG00000097006	9530082P21Rik	antisense	MGI Symbol	3	RIKEN cDNA 9530082P21 gene [Source:MGI Symbol;Acc:MGI:3603340]	0.381322	0.661234	1.59172	0.117378	0.999227	-4.67357
ENSMUSG00000034584	Exph5	protein_coding	MGI Symbol	3	exophilin 5 [Source:MGI Symbol;Acc:MGI:2443248]	0.431665	0.234348	1.50921	0.137167	0.999227	-4.67396
ENSMUSG00000103477	5930409G06Rik	TEC	MGI Symbol	1	RIKEN cDNA 5930409G06 gene [Source:MGI Symbol;Acc:MGI:1924316]	0.461568	-0.0564283	1.50024	0.139469	0.999227	-4.6742
ENSMUSG00000044390	Tigd3	protein_coding	MGI Symbol	2	tigger transposable element derived 3 [Source:MGI Symbol;Acc:MGI:2681860]	0.380299	1.33208	1.66721	0.101354	0.999227	-4.67622
ENSMUSG00000111151	Gm5120	processed_pseudogene	MGI Symbol	1	predicted gene 5120 [Source:MGI Symbol;Acc:MGI:3646745]	0.359156	-0.300452	1.45568	0.151361	0.999227	-4.67747
ENSMUSG00000108520	Gm44684	processed_transcript	MGI Symbol	1	predicted gene 44684 [Source:MGI Symbol;Acc:MGI:5753260]	0.514193	0.494922	1.54126	0.129186	0.999227	-4.67773
ENSMUSG00000059743	Fdps	protein_coding	MGI Symbol	7	farnesyl diphosphate synthetase [Source:MGI Symbol;Acc:MGI:104888]	0.375326	0.864736	1.58017	0.120001	0.999227	-4.67831
ENSMUSG00000030871	Ears2	protein_coding	MGI Symbol	3	glutamyl-tRNA synthetase 2, mitochondrial [Source:MGI Symbol;Acc:MGI:1914667]	-0.437171	2.62065	-1.88139	0.0654003	0.999227	-4.67986
ENSMUSG00000068615	Gjd2	protein_coding	MGI Symbol	1	gap junction protein, delta 2 [Source:MGI Symbol;Acc:MGI:1334209]	-0.481587	0.657127	-1.6517	0.104492	0.999227	-4.68045
ENSMUSG00000000730	Dnmt3l	protein_coding	MGI Symbol	8	DNA (cytosine-5-)-methyltransferase 3-like [Source:MGI Symbol;Acc:MGI:1859287]	0.543748	-0.420036	1.39671	0.168306	0.999227	-4.68081
ENSMUSG00000046387	Pcdhb17	protein_coding	MGI Symbol	1	protocadherin beta 17 [Source:MGI Symbol;Acc:MGI:2136754]	-0.292851	2.88787	-1.90195	0.0626027	0.999227	-4.68142
ENSMUSG00000025858	Get4	protein_coding	MGI Symbol	6	golgi to ER traffic protein 4 [Source:MGI Symbol;Acc:MGI:1914854]	-0.309897	4.03501	-2.01054	0.0494588	0.999227	-4.68163
ENSMUSG00000029070	Mxra8	protein_coding	MGI Symbol	7	matrix-remodelling associated 8 [Source:MGI Symbol;Acc:MGI:1922011]	-0.349957	1.66762	-1.75989	0.0841793	0.999227	-4.68243
ENSMUSG00000099104	Gm17087	protein_coding	MGI Symbol	2	predicted gene 17087 [Source:MGI Symbol;Acc:MGI:4937914]	0.331356	1.64145	1.68707	0.0974503	0.999227	-4.68304
ENSMUSG00000029033	Acap3	protein_coding	MGI Symbol	9	ArfGAP with coiled-coil, ankyrin repeat and PH domains 3 [Source:MGI Symbol;Acc:MGI:2153589]	-0.189518	6.34366	-2.13394	0.0374792	0.999227	-4.68417
ENSMUSG00000020697	Lig3	protein_coding	MGI Symbol	12	ligase III, DNA, ATP-dependent [Source:MGI Symbol;Acc:MGI:109152]	-0.265817	2.84975	-1.89004	0.06421	0.999227	-4.68497
ENSMUSG00000026563	Tada1	protein_coding	MGI Symbol	4	transcriptional adaptor 1 [Source:MGI Symbol;Acc:MGI:1196415]	0.223388	4.67417	2.02978	0.047397	0.999227	-4.68528
ENSMUSG00000097488	4732487G21Rik	lincRNA	MGI Symbol	1	RIKEN cDNA 4732487G21 gene [Source:MGI Symbol;Acc:MGI:2441820]	0.501085	-0.440772	1.42598	0.159722	0.999227	-4.68691
ENSMUSG00000033510	Otud7a	protein_coding	MGI Symbol	4	OTU domain containing 7A [Source:MGI Symbol;Acc:MGI:2158505]	-0.332063	1.92631	-1.78749	0.0795591	0.999227	-4.68708
ENSMUSG00000002257	Def6	protein_coding	MGI Symbol	8	differentially expressed in FDCP 6 [Source:MGI Symbol;Acc:MGI:1346328]	0.505446	-0.332044	1.45295	0.152116	0.999227	-4.68793
ENSMUSG00000042116	Vwa1	protein_coding	MGI Symbol	1	von Willebrand factor A domain containing 1 [Source:MGI Symbol;Acc:MGI:2179729]	-0.591734	2.25087	-1.85222	0.0695499	0.999227	-4.69041
ENSMUSG00000005397	Nid1	protein_coding	MGI Symbol	3	nidogen 1 [Source:MGI Symbol;Acc:MGI:97342]	-0.583059	0.214618	-1.56592	0.1233	0.999227	-4.69197
ENSMUSG00000101144	Gm29054	processed_transcript	MGI Symbol	2	predicted gene 29054 [Source:MGI Symbol;Acc:MGI:5579760]	-0.416514	0.620509	-1.64319	0.106247	0.999227	-4.69507
ENSMUSG00000021750	Fam107a	protein_coding	MGI Symbol	4	family with sequence similarity 107, member A [Source:MGI Symbol;Acc:MGI:3041256]	0.329113	7.51286	2.14124	0.0368578	0.999227	-4.69597
ENSMUSG00000039109	F13a1	protein_coding	MGI Symbol	5	coagulation factor XIII, A1 subunit [Source:MGI Symbol;Acc:MGI:1921395]	-0.584382	-0.0483576	-1.53624	0.130412	0.999227	-4.69685
ENSMUSG00000032313	Tmem266	protein_coding	MGI Symbol	3	transmembrane protein 266 [Source:MGI Symbol;Acc:MGI:2142980]	-0.350062	1.84777	-1.77644	0.0813831	0.999227	-4.69852
ENSMUSG00000085891	Gm14634	processed_transcript	MGI Symbol	2	predicted gene 14634 [Source:MGI Symbol;Acc:MGI:3705147]	0.343573	0.888543	1.59075	0.117595	0.999227	-4.69912
ENSMUSG00000062991	Nrg1	protein_coding	MGI Symbol	33	neuregulin 1 [Source:MGI Symbol;Acc:MGI:96083]	0.320181	1.864	1.72772	0.0898447	0.999227	-4.69938
ENSMUSG00000087150	BC064078	transcribed_unprocessed_pseudogene	MGI Symbol	2	cDNA sequence BC064078 [Source:MGI Symbol;Acc:MGI:3040692]	0.390082	0.749023	1.57547	0.121081	0.999227	-4.69943
ENSMUSG00000080870	Gm14111	processed_pseudogene	MGI Symbol	1	predicted gene 14111 [Source:MGI Symbol;Acc:MGI:3652258]	-0.305887	0.630807	-1.61241	0.112794	0.999227	-4.70099
ENSMUSG00000042472	Zfp410	protein_coding	MGI Symbol	18	zinc finger protein 410 [Source:MGI Symbol;Acc:MGI:1289280]	0.1856	5.21423	2.06525	0.0437905	0.999227	-4.70136
ENSMUSG00000048277	Syngr2	protein_coding	MGI Symbol	7	synaptogyrin 2 [Source:MGI Symbol;Acc:MGI:1328324]	-0.271583	2.82172	-1.87566	0.0661988	0.999227	-4.7021
ENSMUSG00000064916	Gm22573	snRNA	MGI Symbol	1	predicted gene, 22573 [Source:MGI Symbol;Acc:MGI:5452350]	0.422559	0.212279	1.49664	0.140402	0.999227	-4.70244
ENSMUSG00000040312	Cchcr1	protein_coding	MGI Symbol	7	coiled-coil alpha-helical rod protein 1 [Source:MGI Symbol;Acc:MGI:2385321]	-0.47535	0.558147	-1.62045	0.111053	0.999227	-4.70456
ENSMUSG00000106579	Gm42771	TEC	MGI Symbol	1	predicted gene 42771 [Source:MGI Symbol;Acc:MGI:5662908]	0.701273	-0.285869	1.40427	0.166053	0.999227	-4.70637
ENSMUSG00000097333	Zfp87	protein_coding	MGI Symbol	4	zinc finger protein 87 [Source:MGI Symbol;Acc:MGI:107768]	0.222686	4.22248	1.97922	0.0529811	0.999227	-4.70847
ENSMUSG00000024442	Dele1	protein_coding	MGI Symbol	7	DAP3 binding cell death enhancer 1 [Source:MGI Symbol;Acc:MGI:1914089]	0.154517	5.30978	2.06681	0.0436376	0.999227	-4.71178
ENSMUSG00000019122	Ccl9	protein_coding	MGI Symbol	2	chemokine (C-C motif) ligand 9 [Source:MGI Symbol;Acc:MGI:104533]	-0.374345	0.966029	-1.64689	0.10548	0.999227	-4.71205
ENSMUSG00000044098	Rsbn1	protein_coding	MGI Symbol	4	rosbin, round spermatid basic protein 1 [Source:MGI Symbol;Acc:MGI:2444993]	-0.394392	2.14642	-1.8061	0.0765652	0.999227	-4.71369
ENSMUSG00000109362	Gm44562	TEC	MGI Symbol	1	predicted gene 44562 [Source:MGI Symbol;Acc:MGI:5753138]	0.713324	-0.244041	1.399	0.167622	0.999227	-4.71384
ENSMUSG00000060427	Zfp868	protein_coding	MGI Symbol	4	zinc finger protein 868 [Source:MGI Symbol;Acc:MGI:2142546]	0.209122	4.59669	2.01239	0.0492575	0.999227	-4.71485
ENSMUSG00000069633	Pex11g	protein_coding	MGI Symbol	3	peroxisomal biogenesis factor 11 gamma [Source:MGI Symbol;Acc:MGI:1920905]	0.444059	0.50303	1.50309	0.138734	0.999227	-4.7178
ENSMUSG00000064023	Klk8	protein_coding	MGI Symbol	3	kallikrein related-peptidase 8 [Source:MGI Symbol;Acc:MGI:1343327]	0.247189	4.99225	2.03049	0.0473226	0.999227	-4.7187
ENSMUSG00000039158	Akna	protein_coding	MGI Symbol	2	AT-hook transcription factor [Source:MGI Symbol;Acc:MGI:2140340]	-0.397023	0.60741	-1.60858	0.113633	0.999227	-4.71916
ENSMUSG00000116953	9030025P20Rik	protein_coding	MGI Symbol	4	RIKEN cDNA 9030025P20 gene [Source:MGI Symbol;Acc:MGI:3583895]	0.335541	1.15388	1.6207	0.111001	0.999227	-4.71953
ENSMUSG00000079499	6530402F18Rik	processed_transcript	MGI Symbol	3	RIKEN cDNA 6530402F18 gene [Source:MGI Symbol;Acc:MGI:1923470]	-0.438495	-0.085262	-1.52684	0.13273	0.999227	-4.7205
ENSMUSG00000037139	Myom3	protein_coding	MGI Symbol	3	myomesin family, member 3 [Source:MGI Symbol;Acc:MGI:2685280]	0.522016	0.791048	1.54527	0.128214	0.999227	-4.7215
ENSMUSG00000029426	Scarb2	protein_coding	MGI Symbol	2	scavenger receptor class B, member 2 [Source:MGI Symbol;Acc:MGI:1196458]	-0.241825	5.29545	-2.07439	0.0429003	0.999227	-4.72182
ENSMUSG00000047992	Dipk1c	protein_coding	MGI Symbol	7	divergent protein kinase domain 1C [Source:MGI Symbol;Acc:MGI:3041188]	0.318461	1.39886	1.65214	0.104402	0.999227	-4.72213
ENSMUSG00000097189	Gm26594	lincRNA	MGI Symbol	1	predicted gene, 26594 [Source:MGI Symbol;Acc:MGI:5477088]	0.359668	0.68228	1.56196	0.124231	0.999227	-4.72275
ENSMUSG00000057596	Trim30d	protein_coding	MGI Symbol	3	tripartite motif-containing 30D [Source:MGI Symbol;Acc:MGI:3035181]	0.515612	0.177087	1.46527	0.148737	0.999227	-4.72302
ENSMUSG00000060890	Arr3	protein_coding	MGI Symbol	7	arrestin 3, retinal [Source:MGI Symbol;Acc:MGI:2159617]	0.515612	0.305492	1.45973	0.15025	0.999227	-4.72388
ENSMUSG00000020865	Abcc3	protein_coding	MGI Symbol	6	ATP-binding cassette, sub-family C (CFTR/MRP), member 3 [Source:MGI Symbol;Acc:MGI:1923658]	-0.596907	-0.561454	-1.47535	0.146017	0.999227	-4.72401
ENSMUSG00000005057	Sh2b2	protein_coding	MGI Symbol	5	SH2B adaptor protein 2 [Source:MGI Symbol;Acc:MGI:1345171]	-0.331158	1.21589	-1.66435	0.101928	0.999227	-4.72476
ENSMUSG00000017868	Sgk2	protein_coding	MGI Symbol	3	serum/glucocorticoid regulated kinase 2 [Source:MGI Symbol;Acc:MGI:1351318]	-0.405327	2.21602	-1.80788	0.0762847	0.999227	-4.72563
ENSMUSG00000049001	Ndnf	protein_coding	MGI Symbol	2	neuron-derived neurotrophic factor [Source:MGI Symbol;Acc:MGI:1915419]	-0.309493	3.65503	-1.93172	0.0587322	0.999227	-4.7278
ENSMUSG00000114034	Gm9267	processed_pseudogene	MGI Symbol	1	predicted gene 9267 [Source:MGI Symbol;Acc:MGI:3646453]	-0.340441	0.063854	-1.5309	0.131725	0.999227	-4.73213
ENSMUSG00000068151	A230006K03Rik	lincRNA	MGI Symbol	2	RIKEN cDNA A230006K03 gene [Source:MGI Symbol;Acc:MGI:3644205]	-0.3596	1.62417	-1.72714	0.0899504	0.999227	-4.73304
ENSMUSG00000036492	Rnf39	protein_coding	MGI Symbol	3	ring finger protein 39 [Source:MGI Symbol;Acc:MGI:2156378]	-0.392292	1.15541	-1.69861	0.0952386	0.999227	-4.73387
ENSMUSG00000027950	Chrnb2	protein_coding	MGI Symbol	3	cholinergic receptor, nicotinic, beta polypeptide 2 (neuronal) [Source:MGI Symbol;Acc:MGI:87891]	-0.275583	3.93907	-1.96176	0.0550361	0.999227	-4.735
ENSMUSG00000018830	Myh11	protein_coding	MGI Symbol	4	myosin, heavy polypeptide 11, smooth muscle [Source:MGI Symbol;Acc:MGI:102643]	-0.618492	-0.0330208	-1.55178	0.126648	0.999227	-4.73619
ENSMUSG00000086873	Gm15672	processed_transcript	MGI Symbol	1	predicted gene 15672 [Source:MGI Symbol;Acc:MGI:3783114]	0.427487	0.346472	1.49473	0.140899	0.999227	-4.7362
ENSMUSG00000093862	Gm5117	processed_pseudogene	MGI Symbol	1	predicted gene 5117 [Source:MGI Symbol;Acc:MGI:3648041]	-0.319476	-0.0247679	-1.50003	0.139524	0.999227	-4.73739
ENSMUSG00000040552	C3ar1	protein_coding	MGI Symbol	1	complement component 3a receptor 1 [Source:MGI Symbol;Acc:MGI:1097680]	-0.357939	0.794259	-1.61444	0.112353	0.999227	-4.73781
ENSMUSG00000056427	Slit3	protein_coding	MGI Symbol	4	slit guidance ligand 3 [Source:MGI Symbol;Acc:MGI:1315202]	-0.318898	3.30818	-1.90644	0.0620057	0.999227	-4.73793
ENSMUSG00000032985	5730522E02Rik	protein_coding	MGI Symbol	8	RIKEN cDNA 5730522E02 gene [Source:MGI Symbol;Acc:MGI:1917876]	-0.23714	2.23327	-1.78294	0.0803058	0.999227	-4.73844
ENSMUSG00000097184	4632428C04Rik	lincRNA	MGI Symbol	1	RIKEN cDNA 4632428C04 gene [Source:MGI Symbol;Acc:MGI:1921600]	-0.548601	-0.421007	-1.48175	0.14431	0.999227	-4.73884
ENSMUSG00000038507	Parp12	protein_coding	MGI Symbol	2	poly (ADP-ribose) polymerase family, member 12 [Source:MGI Symbol;Acc:MGI:2143990]	-0.353565	1.87477	-1.7507	0.0857669	0.999227	-4.73903
ENSMUSG00000060512	0610040J01Rik	protein_coding	MGI Symbol	4	RIKEN cDNA 0610040J01 gene [Source:MGI Symbol;Acc:MGI:1923511]	-0.282301	2.64394	-1.83797	0.0716573	0.999227	-4.74002
ENSMUSG00000047844	Bex4	protein_coding	MGI Symbol	1	brain expressed X-linked 4 [Source:MGI Symbol;Acc:MGI:3606746]	-0.1932	5.03414	-2.05883	0.0444254	0.999227	-4.74037
ENSMUSG00000026956	Uap1l1	protein_coding	MGI Symbol	6	UDP-N-acteylglucosamine pyrophosphorylase 1-like 1 [Source:MGI Symbol;Acc:MGI:2443318]	-0.428029	3.24267	-1.91228	0.0612353	0.999227	-4.74115
ENSMUSG00000027776	Il12a	protein_coding	MGI Symbol	6	interleukin 12a [Source:MGI Symbol;Acc:MGI:96539]	0.407944	0.467587	1.49509	0.140804	0.999227	-4.7416
ENSMUSG00000021294	Kif26a	protein_coding	MGI Symbol	2	kinesin family member 26A [Source:MGI Symbol;Acc:MGI:2447072]	0.527096	0.166466	1.458	0.150723	0.999227	-4.74367
ENSMUSG00000025225	Nfkb2	protein_coding	MGI Symbol	8	nuclear factor of kappa light polypeptide gene enhancer in B cells 2, p49/p100 [Source:MGI Symbol;Acc:MGI:1099800]	-0.406133	0.527387	-1.59381	0.116908	0.999227	-4.74397
ENSMUSG00000062743	Zfp677	protein_coding	MGI Symbol	2	zinc finger protein 677 [Source:MGI Symbol;Acc:MGI:3053207]	-0.397142	1.15708	-1.67603	0.0996043	0.999227	-4.74425
ENSMUSG00000093806	Asmt	protein_coding	MGI Symbol	1	acetylserotonin O-methyltransferase [Source:MGI Symbol;Acc:MGI:96090]	-0.589045	-0.518677	-1.47609	0.145818	0.999227	-4.74755
ENSMUSG00000113121	Gm35161	antisense	MGI Symbol	2	predicted gene, 35161 [Source:MGI Symbol;Acc:MGI:5594320]	0.474144	-0.280318	1.38896	0.170636	0.999227	-4.74906
ENSMUSG00000114575	Gm47814	lincRNA	MGI Symbol	1	predicted gene, 47814 [Source:MGI Symbol;Acc:MGI:6096999]	-0.363514	-0.165352	-1.47766	0.145399	0.999227	-4.7503
ENSMUSG00000052911	Lamb2	protein_coding	MGI Symbol	7	laminin, beta 2 [Source:MGI Symbol;Acc:MGI:99916]	-0.422054	1.46852	-1.70662	0.0937293	0.999227	-4.75164
ENSMUSG00000041445	Mmrn2	protein_coding	MGI Symbol	2	multimerin 2 [Source:MGI Symbol;Acc:MGI:2385618]	-0.582099	-0.753108	-1.42326	0.160505	0.999227	-4.76039
ENSMUSG00000041313	Slc7a1	protein_coding	MGI Symbol	6	solute carrier family 7 (cationic amino acid transporter, y+ system), member 1 [Source:MGI Symbol;Acc:MGI:88117]	-0.242344	3.48575	-1.91895	0.0603668	0.999227	-4.76122
ENSMUSG00000036278	Macrod1	protein_coding	MGI Symbol	1	mono-ADP ribosylhydrolase 1 [Source:MGI Symbol;Acc:MGI:2147583]	-0.323442	2.32201	-1.78893	0.0793244	0.999227	-4.76282
ENSMUSG00000040253	Gbp7	protein_coding	MGI Symbol	2	guanylate binding protein 7 [Source:MGI Symbol;Acc:MGI:2444421]	-0.320624	1.95257	-1.74826	0.0861923	0.999227	-4.76327
ENSMUSG00000109517	Gm44763	antisense	MGI Symbol	1	predicted gene 44763 [Source:MGI Symbol;Acc:MGI:5753339]	0.567446	-0.355182	1.36304	0.178616	0.999227	-4.76391
ENSMUSG00000025024	Smndc1	protein_coding	MGI Symbol	5	survival motor neuron domain containing 1 [Source:MGI Symbol;Acc:MGI:1923729]	-0.161576	5.52242	-2.06627	0.04369	0.999227	-4.76438
ENSMUSG00000024135	Srbd1	protein_coding	MGI Symbol	6	S1 RNA binding domain 1 [Source:MGI Symbol;Acc:MGI:1925836]	0.251413	2.87935	1.8013	0.0773291	0.999227	-4.76488
ENSMUSG00000030793	Pycard	protein_coding	MGI Symbol	2	PYD and CARD domain containing [Source:MGI Symbol;Acc:MGI:1931465]	0.280156	1.80422	1.66656	0.101484	0.999227	-4.76571
ENSMUSG00000062488	Ifit3b	protein_coding	MGI Symbol	1	interferon-induced protein with tetratricopeptide repeats 3B [Source:MGI Symbol;Acc:MGI:3698419]	-0.357372	2.5343	-1.81986	0.0744126	0.999227	-4.76617
ENSMUSG00000021125	Arg2	protein_coding	MGI Symbol	1	arginase type II [Source:MGI Symbol;Acc:MGI:1330806]	-0.290546	2.63479	-1.81948	0.0744719	0.999227	-4.76621
ENSMUSG00000100351	Gm7867	processed_pseudogene	MGI Symbol	1	predicted gene 7867 [Source:MGI Symbol;Acc:MGI:3644627]	-0.362891	-0.163107	-1.46667	0.148357	0.999227	-4.76668
ENSMUSG00000027737	Slc7a11	protein_coding	MGI Symbol	5	solute carrier family 7 (cationic amino acid transporter, y+ system), member 11 [Source:MGI Symbol;Acc:MGI:1347355]	-0.387178	3.47027	-1.90896	0.0616719	0.999227	-4.76669
ENSMUSG00000078440	Dohh	protein_coding	MGI Symbol	5	deoxyhypusine hydroxylase/monooxygenase [Source:MGI Symbol;Acc:MGI:1915964]	-0.282879	4.88974	-2.03524	0.0468259	0.999227	-4.76738
ENSMUSG00000022436	Sh3bp1	protein_coding	MGI Symbol	9	SH3-domain binding protein 1 [Source:MGI Symbol;Acc:MGI:104603]	-0.260512	2.29758	-1.7906	0.0790527	0.999227	-4.7674
ENSMUSG00000040653	Ppp1r14c	protein_coding	MGI Symbol	2	protein phosphatase 1, regulatory inhibitor subunit 14C [Source:MGI Symbol;Acc:MGI:1923392]	-0.305334	4.03769	-1.96643	0.0544801	0.999227	-4.76991
ENSMUSG00000097979	Gm4691	transcribed_processed_pseudogene	MGI Symbol	2	predicted gene 4691 [Source:MGI Symbol;Acc:MGI:3782871]	0.301092	1.17282	1.57159	0.12198	0.999227	-4.77203
ENSMUSG00000024960	Plcb3	protein_coding	MGI Symbol	10	phospholipase C, beta 3 [Source:MGI Symbol;Acc:MGI:104778]	-0.294152	1.88652	-1.74677	0.086453	0.999227	-4.77246
ENSMUSG00000028195	Ccn1	protein_coding	MGI Symbol	1	cellular communication network factor 1 [Source:MGI Symbol;Acc:MGI:88613]	-0.442761	0.871442	-1.59759	0.116062	0.999227	-4.77251
ENSMUSG00000097268	Gm26805	antisense	MGI Symbol	1	predicted gene, 26805 [Source:MGI Symbol;Acc:MGI:5477299]	0.391743	1.12107	1.58049	0.119928	0.999227	-4.77293
ENSMUSG00000069833	Ahnak	protein_coding	MGI Symbol	5	AHNAK nucleoprotein (desmoyokin) [Source:MGI Symbol;Acc:MGI:1316648]	-0.446537	2.70112	-1.83562	0.0720099	0.999227	-4.77575
ENSMUSG00000038991	Txndc5	protein_coding	MGI Symbol	4	thioredoxin domain containing 5 [Source:MGI Symbol;Acc:MGI:2145316]	-0.28467	3.8678	-1.93931	0.0577794	0.999227	-4.77625
ENSMUSG00000032322	Pstpip1	protein_coding	MGI Symbol	7	proline-serine-threonine phosphatase-interacting protein 1 [Source:MGI Symbol;Acc:MGI:1321396]	0.380667	1.3917	1.57811	0.120473	0.999227	-4.77694
ENSMUSG00000082100	Glns-ps1	processed_pseudogene	MGI Symbol	1	glutamine synthetase pseudogene 1 [Source:MGI Symbol;Acc:MGI:95740]	0.302708	1.8263	1.6637	0.102057	0.999227	-4.77791
ENSMUSG00000063953	Amd2	protein_coding	MGI Symbol	1	S-adenosylmethionine decarboxylase 2 [Source:MGI Symbol;Acc:MGI:1333111]	0.274179	1.82153	1.6642	0.101957	0.999227	-4.77795
ENSMUSG00000020648	Dus4l	protein_coding	MGI Symbol	3	dihydrouridine synthase 4-like (S. cerevisiae) [Source:MGI Symbol;Acc:MGI:1919166]	0.236705	3.00599	1.81872	0.0745897	0.999227	-4.77798
ENSMUSG00000026177	Slc11a1	protein_coding	MGI Symbol	11	solute carrier family 11 (proton-coupled divalent metal ion transporters), member 1 [Source:MGI Symbol;Acc:MGI:1345275]	0.42117	0.607391	1.48533	0.143362	0.999227	-4.77856
ENSMUSG00000034401	Spata6	protein_coding	MGI Symbol	14	spermatogenesis associated 6 [Source:MGI Symbol;Acc:MGI:1915196]	-0.386402	0.747813	-1.55881	0.124976	0.999227	-4.77924
ENSMUSG00000030319	Cand2	protein_coding	MGI Symbol	1	cullin-associated and neddylation-dissociated 2 (putative) [Source:MGI Symbol;Acc:MGI:1914338]	0.411869	1.77723	1.63308	0.108362	0.999227	-4.77961
ENSMUSG00000040204	Pclaf	protein_coding	MGI Symbol	3	PCNA clamp associated factor [Source:MGI Symbol;Acc:MGI:1915276]	0.456554	0.253393	1.4276	0.159256	0.999227	-4.77979
ENSMUSG00000055943	Emc7	protein_coding	MGI Symbol	1	ER membrane protein complex subunit 7 [Source:MGI Symbol;Acc:MGI:1920274]	-0.187637	6.5909	-2.0897	0.0414457	0.999227	-4.78112
ENSMUSG00000031668	Eif2ak3	protein_coding	MGI Symbol	5	eukaryotic translation initiation factor 2 alpha kinase 3 [Source:MGI Symbol;Acc:MGI:1341830]	-0.278532	2.56011	-1.7928	0.0786947	0.999227	-4.78406
ENSMUSG00000033717	Adra2a	protein_coding	MGI Symbol	2	adrenergic receptor, alpha 2a [Source:MGI Symbol;Acc:MGI:87934]	-0.387017	0.783824	-1.57806	0.120485	0.999227	-4.7851
ENSMUSG00000101930	Gm5441	antisense	MGI Symbol	2	predicted gene 5441 [Source:MGI Symbol;Acc:MGI:3779489]	-0.429793	-0.198407	-1.43386	0.15747	0.999227	-4.78533
ENSMUSG00000018372	Cep95	protein_coding	MGI Symbol	7	centrosomal protein 95 [Source:MGI Symbol;Acc:MGI:2443502]	0.246514	2.73319	1.78294	0.0803062	0.999227	-4.78562
ENSMUSG00000037370	Enpp1	protein_coding	MGI Symbol	5	ectonucleotide pyrophosphatase/phosphodiesterase 1 [Source:MGI Symbol;Acc:MGI:97370]	-0.486028	0.600015	-1.54371	0.128592	0.999227	-4.78629
ENSMUSG00000032384	Csnk1g1	protein_coding	MGI Symbol	17	casein kinase 1, gamma 1 [Source:MGI Symbol;Acc:MGI:2660884]	0.164046	5.64254	2.04456	0.0458645	0.999227	-4.78692
ENSMUSG00000055799	Tcf7l1	protein_coding	MGI Symbol	5	transcription factor 7 like 1 (T cell specific, HMG box) [Source:MGI Symbol;Acc:MGI:1202876]	-0.321308	1.80383	-1.71784	0.091647	0.999227	-4.78732
ENSMUSG00000086004	Gm7805	processed_pseudogene	MGI Symbol	1	predicted gene 7805 [Source:MGI Symbol;Acc:MGI:3643359]	0.402639	0.2514	1.43648	0.156724	0.999227	-4.78766
ENSMUSG00000074034	Gm5921	processed_pseudogene	MGI Symbol	1	predicted gene 5921 [Source:MGI Symbol;Acc:MGI:3648968]	-0.432842	-0.147629	-1.48292	0.144002	0.999227	-4.7887
ENSMUSG00000071112	Spx	protein_coding	MGI Symbol	4	spexin hormone [Source:MGI Symbol;Acc:MGI:2442262]	0.408469	0.283052	1.42003	0.161439	0.999227	-4.78895
ENSMUSG00000104727	Gm42500	lincRNA	MGI Symbol	1	predicted gene 42500 [Source:MGI Symbol;Acc:MGI:5662637]	-0.436447	-0.107041	-1.45491	0.151575	0.999227	-4.78964
ENSMUSG00000073643	Wdfy1	protein_coding	MGI Symbol	14	WD repeat and FYVE domain containing 1 [Source:MGI Symbol;Acc:MGI:1916618]	-0.8671	5.48864	-2.04801	0.0455127	0.999227	-4.79017
ENSMUSG00000019297	Nop9	protein_coding	MGI Symbol	2	NOP9 nucleolar protein [Source:MGI Symbol;Acc:MGI:1915092]	-0.314034	2.73809	-1.81801	0.0746997	0.999227	-4.79184
ENSMUSG00000025133	Ints4	protein_coding	MGI Symbol	7	integrator complex subunit 4 [Source:MGI Symbol;Acc:MGI:1917164]	0.228918	4.73151	1.97603	0.0533508	0.999227	-4.79355
ENSMUSG00000029161	Cgref1	protein_coding	MGI Symbol	2	cell growth regulator with EF hand domain 1 [Source:MGI Symbol;Acc:MGI:1915817]	0.269696	2.08167	1.68187	0.0984599	0.999227	-4.79647
ENSMUSG00000020686	Gas2l2	protein_coding	MGI Symbol	2	growth arrest-specific 2 like 2 [Source:MGI Symbol;Acc:MGI:3652048]	-0.478906	-0.243003	-1.46989	0.147485	0.999227	-4.79663
ENSMUSG00000022178	Ajuba	protein_coding	MGI Symbol	2	ajuba LIM protein [Source:MGI Symbol;Acc:MGI:1341886]	0.519975	-0.22814	1.35426	0.181381	0.999227	-4.79668
ENSMUSG00000029832	Nfe2l3	protein_coding	MGI Symbol	3	nuclear factor, erythroid derived 2, like 3 [Source:MGI Symbol;Acc:MGI:1339958]	-0.407155	0.516936	-1.54856	0.12742	0.999227	-4.79806
ENSMUSG00000081176	H3f3a-ps2	processed_pseudogene	MGI Symbol	1	H3.3 histone A, pseudogene 2 [Source:MGI Symbol;Acc:MGI:1101758]	0.404733	-0.333967	1.35756	0.180339	0.999227	-4.79813
ENSMUSG00000045667	Smtnl2	protein_coding	MGI Symbol	4	smoothelin-like 2 [Source:MGI Symbol;Acc:MGI:2442764]	0.368475	1.66058	1.60243	0.114988	0.999227	-4.79817
ENSMUSG00000063830	Gm6065	processed_pseudogene	MGI Symbol	1	predicted gene 6065 [Source:MGI Symbol;Acc:MGI:3645391]	-0.34223	0.455792	-1.52126	0.13412	0.999227	-4.79827
ENSMUSG00000041046	Ramp3	protein_coding	MGI Symbol	2	receptor (calcitonin) activity modifying protein 3 [Source:MGI Symbol;Acc:MGI:1860292]	0.294021	3.12505	1.81909	0.0745327	0.999227	-4.79978
ENSMUSG00000083567	Gm11451	processed_pseudogene	MGI Symbol	1	predicted gene 11451 [Source:MGI Symbol;Acc:MGI:3705412]	0.418734	-0.0911205	1.36638	0.177573	0.999227	-4.79997
ENSMUSG00000084946	Dlx1as	antisense	MGI Symbol	4	distal-less homeobox 1, antisense [Source:MGI Symbol;Acc:MGI:1195983]	0.299624	1.52162	1.60138	0.11522	0.999227	-4.80138
ENSMUSG00000058420	Syt17	protein_coding	MGI Symbol	6	synaptotagmin XVII [Source:MGI Symbol;Acc:MGI:104966]	0.205318	6.09341	2.05601	0.044706	0.999227	-4.80222
ENSMUSG00000019944	Rhobtb1	protein_coding	MGI Symbol	13	Rho-related BTB domain containing 1 [Source:MGI Symbol;Acc:MGI:1916538]	0.457235	0.638187	1.46963	0.147555	0.999227	-4.80433
ENSMUSG00000075302	Erich2	protein_coding	MGI Symbol	5	glutamate rich 2 [Source:MGI Symbol;Acc:MGI:1913998]	0.585882	-0.541958	1.30526	0.197427	0.999227	-4.8048
ENSMUSG00000045008	9030612E09Rik	bidirectional_promoter_lncRNA	MGI Symbol	2	RIKEN cDNA 9030612E09 gene [Source:MGI Symbol;Acc:MGI:1921780]	-0.475999	-0.209052	-1.45201	0.152376	0.999227	-4.80494
ENSMUSG00000031434	Morc4	protein_coding	MGI Symbol	10	microrchidia 4 [Source:MGI Symbol;Acc:MGI:1922996]	-0.34067	1.15132	-1.61262	0.112748	0.999227	-4.80499
ENSMUSG00000021706	Zfyve16	protein_coding	MGI Symbol	4	zinc finger, FYVE domain containing 16 [Source:MGI Symbol;Acc:MGI:2145181]	0.276584	3.06028	1.79557	0.0782481	0.999227	-4.80536
ENSMUSG00000021136	Smoc1	protein_coding	MGI Symbol	3	SPARC related modular calcium binding 1 [Source:MGI Symbol;Acc:MGI:1929878]	-0.377045	1.61688	-1.68546	0.097763	0.999227	-4.80617
ENSMUSG00000099875	Rbm3-ps	processed_pseudogene	MGI Symbol	1	RNA binding motif (RNP1, RRM) protein 3 [Source:MGI Symbol;Acc:MGI:3642874]	-0.328092	1.21864	-1.65593	0.103627	0.999227	-4.80669
ENSMUSG00000037418	Best1	protein_coding	MGI Symbol	3	bestrophin 1 [Source:MGI Symbol;Acc:MGI:1346332]	0.3881	0.734571	1.48669	0.143004	0.999227	-4.80686
ENSMUSG00000028709	Mob3c	protein_coding	MGI Symbol	3	MOB kinase activator 3C [Source:MGI Symbol;Acc:MGI:2140623]	0.271423	2.86366	1.77488	0.0816437	0.999227	-4.80706
ENSMUSG00000020190	Mknk2	protein_coding	MGI Symbol	5	MAP kinase-interacting serine/threonine kinase 2 [Source:MGI Symbol;Acc:MGI:894279]	-0.219458	4.37027	-1.966	0.0545303	0.999227	-4.80865
ENSMUSG00000104346	Pcdhga3	protein_coding	MGI Symbol	1	protocadherin gamma subfamily A, 3 [Source:MGI Symbol;Acc:MGI:1935215]	-0.402433	1.16564	-1.59587	0.116446	0.999227	-4.80895
ENSMUSG00000028681	Ptch2	protein_coding	MGI Symbol	6	patched 2 [Source:MGI Symbol;Acc:MGI:1095405]	0.412004	-0.150892	1.35615	0.180786	0.999227	-4.80952
ENSMUSG00000097487	Ptges3l	protein_coding	MGI Symbol	5	prostaglandin E synthase 3 like [Source:MGI Symbol;Acc:MGI:1916146]	0.358968	0.321093	1.41919	0.161682	0.999227	-4.81318
ENSMUSG00000097404	Gm10814	antisense	MGI Symbol	1	predicted gene 10814 [Source:MGI Symbol;Acc:MGI:3642580]	-0.32083	0.376597	-1.51848	0.134819	0.999227	-4.81483
ENSMUSG00000105489	Gm38562	antisense	MGI Symbol	1	predicted gene, 38562 [Source:MGI Symbol;Acc:MGI:5621447]	0.575587	-0.480522	1.34637	0.183895	0.999227	-4.81524
ENSMUSG00000048617	Rtbdn	protein_coding	MGI Symbol	4	retbindin [Source:MGI Symbol;Acc:MGI:2443686]	0.429722	-0.0893003	1.37	0.176447	0.999227	-4.8153
ENSMUSG00000027716	Trpc3	protein_coding	MGI Symbol	5	transient receptor potential cation channel, subfamily C, member 3 [Source:MGI Symbol;Acc:MGI:109526]	0.550433	0.497364	1.4138	0.163249	0.999227	-4.81777
ENSMUSG00000085982	9530051G07Rik	processed_transcript	MGI Symbol	1	RIKEN cDNA 9530051G07 gene [Source:MGI Symbol;Acc:MGI:2442715]	0.564362	-0.591214	1.29169	0.202051	0.999227	-4.81957
ENSMUSG00000023923	Tbc1d5	protein_coding	MGI Symbol	9	TBC1 domain family, member 5 [Source:MGI Symbol;Acc:MGI:1919488]	0.172172	4.74404	1.96654	0.054467	0.999227	-4.82014
ENSMUSG00000030790	Adm	protein_coding	MGI Symbol	2	adrenomedullin [Source:MGI Symbol;Acc:MGI:108058]	0.467291	0.856745	1.4902	0.142083	0.999227	-4.82024
ENSMUSG00000071714	Csf2rb2	protein_coding	MGI Symbol	4	colony stimulating factor 2 receptor, beta 2, low-affinity (granulocyte-macrophage) [Source:MGI Symbol;Acc:MGI:1339760]	-0.582829	-0.446845	-1.40267	0.166529	0.999227	-4.82054
ENSMUSG00000107932	Gm44432	TEC	MGI Symbol	1	predicted gene, 44432 [Source:MGI Symbol;Acc:MGI:5690824]	0.613885	-0.411644	1.29449	0.20109	0.999227	-4.82294
ENSMUSG00000043496	Tril	protein_coding	MGI Symbol	1	TLR4 interactor with leucine-rich repeats [Source:MGI Symbol;Acc:MGI:1914123]	-0.29	3.62331	-1.89019	0.0641897	0.999227	-4.8237
ENSMUSG00000026849	Tor1a	protein_coding	MGI Symbol	5	torsin family 1, member A (torsin A) [Source:MGI Symbol;Acc:MGI:1353568]	-0.182223	6.14516	-2.05635	0.0446722	0.999227	-4.82374
ENSMUSG00000037822	Smim14	protein_coding	MGI Symbol	9	small integral membrane protein 14 [Source:MGI Symbol;Acc:MGI:1915802]	-0.123537	7.6699	-2.08138	0.0422313	0.999227	-4.82444
ENSMUSG00000000794	Kcnn3	protein_coding	MGI Symbol	2	potassium intermediate/small conductance calcium-activated channel, subfamily N, member 3 [Source:MGI Symbol;Acc:MGI:2153183]	0.315326	1.74275	1.62135	0.11086	0.999227	-4.82472
ENSMUSG00000041695	Kcnj2	protein_coding	MGI Symbol	1	potassium inwardly-rectifying channel, subfamily J, member 2 [Source:MGI Symbol;Acc:MGI:104744]	-0.399061	2.85384	-1.81472	0.0752114	0.999227	-4.82515
ENSMUSG00000020608	Smc6	protein_coding	MGI Symbol	12	structural maintenance of chromosomes 6 [Source:MGI Symbol;Acc:MGI:1914491]	-0.138442	6.20656	-2.056	0.0447075	0.999227	-4.82622
ENSMUSG00000068874	Selenbp1	protein_coding	MGI Symbol	5	selenium binding protein 1 [Source:MGI Symbol;Acc:MGI:96825]	0.256703	4.13538	1.90097	0.0627337	0.999227	-4.82811
ENSMUSG00000096755	Ftl1-ps2	processed_pseudogene	MGI Symbol	1	ferritin light polypeptide, pseudogene 2 [Source:MGI Symbol;Acc:MGI:5434102]	-0.333522	0.769622	-1.55525	0.125821	0.999227	-4.82816
ENSMUSG00000031654	Cbln1	protein_coding	MGI Symbol	3	cerebellin 1 precursor protein [Source:MGI Symbol;Acc:MGI:88281]	-0.456297	0.0836404	-1.47082	0.147234	0.999227	-4.82822
ENSMUSG00000043614	Vps37d	protein_coding	MGI Symbol	2	vacuolar protein sorting 37D [Source:MGI Symbol;Acc:MGI:2159402]	-0.353808	2.00762	-1.72123	0.0910243	0.999227	-4.82853
ENSMUSG00000045337	Defb11	protein_coding	MGI Symbol	1	defensin beta 11 [Source:MGI Symbol;Acc:MGI:2179197]	-1.23084	-3.29224	-1.15077	0.254979	0.999227	-4.82892
ENSMUSG00000044393	Dsg2	protein_coding	MGI Symbol	3	desmoglein 2 [Source:MGI Symbol;Acc:MGI:1196466]	-0.486952	0.268905	-1.49309	0.141325	0.999227	-4.82912
ENSMUSG00000036632	Alg5	protein_coding	MGI Symbol	4	asparagine-linked glycosylation 5 (dolichyl-phosphate beta-glucosyltransferase) [Source:MGI Symbol;Acc:MGI:1913498]	-0.212339	4.49455	-1.96153	0.0550632	0.999227	-4.8305
ENSMUSG00000021280	Exoc3l4	protein_coding	MGI Symbol	12	exocyst complex component 3-like 4 [Source:MGI Symbol;Acc:MGI:1921363]	0.527672	-0.125025	1.35104	0.182407	0.999227	-4.83053
ENSMUSG00000043602	Zfp3	protein_coding	MGI Symbol	1	zinc finger protein 3 [Source:MGI Symbol;Acc:MGI:99177]	-0.262809	3.76042	-1.90932	0.0616252	0.999227	-4.83172
ENSMUSG00000040584	Abcb1a	protein_coding	MGI Symbol	4	ATP-binding cassette, sub-family B (MDR/TAP), member 1A [Source:MGI Symbol;Acc:MGI:97570]	-0.449941	1.02677	-1.59985	0.115559	0.999227	-4.83188
ENSMUSG00000111212	Gm47087	TEC	MGI Symbol	1	predicted gene, 47087 [Source:MGI Symbol;Acc:MGI:6095814]	0.63895	-0.313807	1.29033	0.20252	0.999227	-4.8323
ENSMUSG00000024885	Aldh3b1	protein_coding	MGI Symbol	2	aldehyde dehydrogenase 3 family, member B1 [Source:MGI Symbol;Acc:MGI:1914939]	0.246163	2.86162	1.76793	0.0828122	0.999227	-4.83245
ENSMUSG00000041842	Fhdc1	protein_coding	MGI Symbol	5	FH2 domain containing 1 [Source:MGI Symbol;Acc:MGI:2684972]	-0.41313	0.49709	-1.50618	0.137942	0.999227	-4.83365
ENSMUSG00000024053	Emilin2	protein_coding	MGI Symbol	11	elastin microfibril interfacer 2 [Source:MGI Symbol;Acc:MGI:2389136]	-0.462602	0.23852	-1.45589	0.151305	0.999227	-4.83449
ENSMUSG00000040860	Crocc	protein_coding	MGI Symbol	11	ciliary rootlet coiled-coil, rootletin [Source:MGI Symbol;Acc:MGI:3529431]	-0.329166	2.03655	-1.72555	0.0902385	0.999227	-4.83508
ENSMUSG00000001157	Gmcl1	protein_coding	MGI Symbol	4	germ cell-less, spermatogenesis associated 1 [Source:MGI Symbol;Acc:MGI:1345156]	0.223618	3.98291	1.87888	0.0657482	0.999227	-4.83517
ENSMUSG00000021569	Trip13	protein_coding	MGI Symbol	3	thyroid hormone receptor interactor 13 [Source:MGI Symbol;Acc:MGI:1916966]	0.428926	0.281734	1.38781	0.170986	0.999227	-4.83552
ENSMUSG00000031374	Zfp92	protein_coding	MGI Symbol	2	zinc finger protein 92 [Source:MGI Symbol;Acc:MGI:108094]	0.425321	0.591093	1.46269	0.14944	0.999227	-4.83706
ENSMUSG00000096977	Gm10827	lincRNA	MGI Symbol	2	predicted gene 10827 [Source:MGI Symbol;Acc:MGI:3642321]	0.472342	-0.400453	1.29678	0.200307	0.999227	-4.84106
ENSMUSG00000046470	Sox18	protein_coding	MGI Symbol	1	SRY (sex determining region Y)-box 18 [Source:MGI Symbol;Acc:MGI:103559]	-0.565526	1.10686	-1.63062	0.108883	0.999227	-4.84177
ENSMUSG00000035310	Lin54	protein_coding	MGI Symbol	10	lin-54 homolog (C. elegans) [Source:MGI Symbol;Acc:MGI:2140902]	-0.190927	3.60868	-1.87116	0.0668314	0.999227	-4.8423
ENSMUSG00000020992	4930512B01Rik	processed_transcript	MGI Symbol	3	RIKEN cDNA 4930512B01 gene [Source:MGI Symbol;Acc:MGI:1921974]	0.373055	0.248083	1.38988	0.17036	0.999227	-4.8429
ENSMUSG00000107352	Gm43660	lincRNA	MGI Symbol	1	predicted gene 43660 [Source:MGI Symbol;Acc:MGI:5663797]	0.322901	0.947054	1.5013	0.139194	0.999227	-4.84293
ENSMUSG00000055653	Gpc3	protein_coding	MGI Symbol	2	glypican 3 [Source:MGI Symbol;Acc:MGI:104903]	-0.390622	1.1313	-1.61471	0.112294	0.999227	-4.84366
ENSMUSG00000055078	Gabra5	protein_coding	MGI Symbol	3	gamma-aminobutyric acid (GABA) A receptor, subunit alpha 5 [Source:MGI Symbol;Acc:MGI:95617]	-0.156427	7.33855	-2.06718	0.0436017	0.999227	-4.84445
ENSMUSG00000028859	Csf3r	protein_coding	MGI Symbol	4	colony stimulating factor 3 receptor (granulocyte) [Source:MGI Symbol;Acc:MGI:1339755]	-0.343951	1.10817	-1.56014	0.124661	0.999227	-4.84487
ENSMUSG00000116305	Lncppara	processed_transcript	MGI Symbol	2	long noncoding RNA near Ppara [Source:MGI Symbol;Acc:MGI:5568843]	-0.346433	1.38166	-1.61827	0.111524	0.999227	-4.84567
ENSMUSG00000070867	Trabd2b	protein_coding	MGI Symbol	1	TraB domain containing 2B [Source:MGI Symbol;Acc:MGI:3650152]	-0.458302	0.893248	-1.53999	0.129495	0.999227	-4.84661
ENSMUSG00000105021	Gm8234	processed_pseudogene	MGI Symbol	1	predicted gene 8234 [Source:MGI Symbol;Acc:MGI:3779790]	-0.321929	0.387354	-1.47537	0.146012	0.999227	-4.84717
ENSMUSG00000029344	Tpst2	protein_coding	MGI Symbol	8	protein-tyrosine sulfotransferase 2 [Source:MGI Symbol;Acc:MGI:1309516]	-0.248022	5.23515	-2.01034	0.0494814	0.999227	-4.84858
ENSMUSG00000057093	Zfp607b	protein_coding	MGI Symbol	4	zinc finger protein 607B [Source:MGI Symbol;Acc:MGI:2148237]	0.186237	4.01767	1.88294	0.0651848	0.999227	-4.84872
ENSMUSG00000015202	Cnksr3	protein_coding	MGI Symbol	2	Cnksr family member 3 [Source:MGI Symbol;Acc:MGI:2674130]	-0.280863	1.46134	-1.63219	0.10855	0.999227	-4.84873
ENSMUSG00000022676	Snai2	protein_coding	MGI Symbol	1	snail family zinc finger 2 [Source:MGI Symbol;Acc:MGI:1096393]	-0.440734	-0.345894	-1.38543	0.171706	0.999227	-4.84875
ENSMUSG00000025592	Dach2	protein_coding	MGI Symbol	8	dachshund family transcription factor 2 [Source:MGI Symbol;Acc:MGI:1890446]	0.506689	-0.263251	1.31555	0.193972	0.999227	-4.84998
ENSMUSG00000001029	Icam2	protein_coding	MGI Symbol	5	intercellular adhesion molecule 2 [Source:MGI Symbol;Acc:MGI:96394]	0.588791	-0.557862	1.25407	0.215302	0.999227	-4.8509
ENSMUSG00000032431	Crtap	protein_coding	MGI Symbol	2	cartilage associated protein [Source:MGI Symbol;Acc:MGI:1891221]	0.491527	-0.145805	1.3036	0.197989	0.999227	-4.85143
ENSMUSG00000100426	Gm4208	lincRNA	MGI Symbol	1	predicted gene 4208 [Source:MGI Symbol;Acc:MGI:3782384]	-0.437549	0.0706429	-1.42411	0.160258	0.999227	-4.85215
ENSMUSG00000057193	Slc44a2	protein_coding	MGI Symbol	10	solute carrier family 44, member 2 [Source:MGI Symbol;Acc:MGI:1915932]	-0.245373	3.7106	-1.87586	0.0661701	0.999227	-4.85351
ENSMUSG00000081378	Rps13-ps4	processed_pseudogene	MGI Symbol	1	ribosomal protein S13, pseudogene 4 [Source:MGI Symbol;Acc:MGI:3648822]	0.286692	1.72374	1.6006	0.115393	0.999227	-4.85534
ENSMUSG00000081010	Gm13880	processed_pseudogene	MGI Symbol	1	predicted gene 13880 [Source:MGI Symbol;Acc:MGI:3649539]	-0.480612	-0.576592	-1.36602	0.177686	0.999227	-4.85992
ENSMUSG00000031568	Rwdd4a	protein_coding	MGI Symbol	5	RWD domain containing 4A [Source:MGI Symbol;Acc:MGI:2681000]	-0.135455	4.88149	-1.97313	0.0536905	0.999227	-4.86007
ENSMUSG00000002204	Napsa	protein_coding	MGI Symbol	5	napsin A aspartic peptidase [Source:MGI Symbol;Acc:MGI:109365]	-0.481741	-0.217457	-1.38969	0.170415	0.999227	-4.86177
ENSMUSG00000049728	Zfp668	protein_coding	MGI Symbol	6	zinc finger protein 668 [Source:MGI Symbol;Acc:MGI:2442943]	-0.17686	4.45404	-1.94224	0.057415	0.999227	-4.8618
ENSMUSG00000036904	Fzd8	protein_coding	MGI Symbol	1	frizzled class receptor 8 [Source:MGI Symbol;Acc:MGI:108460]	-0.362064	0.361294	-1.44413	0.154571	0.999227	-4.86202
ENSMUSG00000016520	Lnx2	protein_coding	MGI Symbol	2	ligand of numb-protein X 2 [Source:MGI Symbol;Acc:MGI:2155959]	0.300833	1.71493	1.58988	0.117793	0.999227	-4.8622
ENSMUSG00000097430	Gm10544	processed_transcript	MGI Symbol	3	predicted gene 10544 [Source:MGI Symbol;Acc:MGI:3642892]	0.397673	-0.355237	1.29995	0.199227	0.999227	-4.86237
ENSMUSG00000022768	Ccdc116	protein_coding	MGI Symbol	5	coiled-coil domain containing 116 [Source:MGI Symbol;Acc:MGI:1924122]	0.482048	-0.389291	1.27237	0.208778	0.999227	-4.86288
ENSMUSG00000047632	Fgfbp3	protein_coding	MGI Symbol	2	fibroblast growth factor binding protein 3 [Source:MGI Symbol;Acc:MGI:1919764]	-0.377272	1.28433	-1.60666	0.114053	0.999227	-4.86576
ENSMUSG00000041608	Entpd3	protein_coding	MGI Symbol	2	ectonucleoside triphosphate diphosphohydrolase 3 [Source:MGI Symbol;Acc:MGI:1321386]	-0.314239	2.23277	-1.70437	0.0941517	0.999227	-4.86631
ENSMUSG00000097305	Gm17276	antisense	MGI Symbol	3	predicted gene, 17276 [Source:MGI Symbol;Acc:MGI:4936910]	0.453906	-0.368104	1.26984	0.209673	0.999227	-4.86641
ENSMUSG00000104284	Gm10862	sense_intronic	MGI Symbol	1	predicted gene 10862 [Source:MGI Symbol;Acc:MGI:3641622]	0.744566	-1.01627	1.15044	0.255111	0.999227	-4.86654
ENSMUSG00000114362	4933433G19Rik	antisense	MGI Symbol	2	RIKEN cDNA 4933433G19 gene [Source:MGI Symbol;Acc:MGI:1918476]	-0.359318	0.564733	-1.49013	0.142101	0.999227	-4.86673
ENSMUSG00000049420	Tmem200a	protein_coding	MGI Symbol	6	transmembrane protein 200A [Source:MGI Symbol;Acc:MGI:1924470]	-0.249647	3.87115	-1.89844	0.063073	0.999227	-4.86702
ENSMUSG00000021497	Txndc15	protein_coding	MGI Symbol	2	thioredoxin domain containing 15 [Source:MGI Symbol;Acc:MGI:1916922]	-0.228927	5.83298	-2.02601	0.0477955	0.999227	-4.86715
ENSMUSG00000066196	Spag8	protein_coding	MGI Symbol	3	sperm associated antigen 8 [Source:MGI Symbol;Acc:MGI:3056295]	-0.44281	0.23406	-1.44759	0.153603	0.999227	-4.8672
ENSMUSG00000030450	Oca2	protein_coding	MGI Symbol	6	oculocutaneous albinism II [Source:MGI Symbol;Acc:MGI:97454]	0.374358	0.415761	1.39056	0.170153	0.999227	-4.86806
ENSMUSG00000064280	Ccdc146	protein_coding	MGI Symbol	5	coiled-coil domain containing 146 [Source:MGI Symbol;Acc:MGI:1922422]	0.626015	-0.335711	1.2449	0.218629	0.999227	-4.86872
ENSMUSG00000054556	Gm4876	antisense	MGI Symbol	6	predicted gene 4876 [Source:MGI Symbol;Acc:MGI:3647654]	-0.306833	0.848224	-1.53431	0.130883	0.999227	-4.86899
ENSMUSG00000039556	Ppp1r3f	protein_coding	MGI Symbol	5	protein phosphatase 1, regulatory subunit 3F [Source:MGI Symbol;Acc:MGI:1859617]	0.359653	-0.0858021	1.32898	0.189532	0.999227	-4.86916
ENSMUSG00000095407	Tmem200c	protein_coding	MGI Symbol	2	transmembrane protein 200C [Source:MGI Symbol;Acc:MGI:3646281]	-0.405536	-0.31198	-1.37286	0.175559	0.999227	-4.86943
ENSMUSG00000030782	Tgfb1i1	protein_coding	MGI Symbol	12	transforming growth factor beta 1 induced transcript 1 [Source:MGI Symbol;Acc:MGI:102784]	0.310893	3.74794	1.83005	0.0728513	0.999227	-4.87003
ENSMUSG00000016942	Tmprss6	protein_coding	MGI Symbol	7	transmembrane serine protease 6 [Source:MGI Symbol;Acc:MGI:1919003]	0.379734	2.37844	1.69064	0.0967621	0.999227	-4.87065
ENSMUSG00000079494	Nat8f5	protein_coding	MGI Symbol	1	N-acetyltransferase 8 (GCN5-related) family member 5 [Source:MGI Symbol;Acc:MGI:1916299]	0.45624	-0.241895	1.3074	0.196703	0.999227	-4.87314
ENSMUSG00000013611	Snx31	protein_coding	MGI Symbol	4	sorting nexin 31 [Source:MGI Symbol;Acc:MGI:1913946]	-0.532822	-0.556436	-1.31368	0.194594	0.999227	-4.87358
ENSMUSG00000031561	Tenm3	protein_coding	MGI Symbol	8	teneurin transmembrane protein 3 [Source:MGI Symbol;Acc:MGI:1345183]	-0.303989	2.85502	-1.78275	0.0803372	0.999227	-4.87397
ENSMUSG00000108042	B130021K23Rik	TEC	MGI Symbol	1	RIKEN cDNA B130021K23 gene [Source:MGI Symbol;Acc:MGI:2442518]	0.342394	0.681599	1.42092	0.161179	0.999227	-4.87554
ENSMUSG00000009828	Cilk1	protein_coding	MGI Symbol	8	ciliogenesis associated kinase 1 [Source:MGI Symbol;Acc:MGI:1934157]	-0.211976	4.08049	-1.90081	0.0627543	0.999227	-4.87693
ENSMUSG00000031775	Pllp	protein_coding	MGI Symbol	3	plasma membrane proteolipid [Source:MGI Symbol;Acc:MGI:1915051]	-0.317319	3.74015	-1.87898	0.0657344	0.999227	-4.87757
ENSMUSG00000087334	AW495222	antisense	MGI Symbol	2	expressed sequence AW495222 [Source:MGI Symbol;Acc:MGI:2145435]	0.330871	0.754015	1.43251	0.157852	0.999227	-4.87787
ENSMUSG00000068323	Slc4a5	protein_coding	MGI Symbol	6	solute carrier family 4, sodium bicarbonate cotransporter, member 5 [Source:MGI Symbol;Acc:MGI:2443220]	-1.33687	-1.53695	-1.30378	0.197926	0.999227	-4.8789
ENSMUSG00000032320	Rcn2	protein_coding	MGI Symbol	4	reticulocalbin 2 [Source:MGI Symbol;Acc:MGI:1349765]	-0.178248	5.56665	-2.00528	0.0500355	0.999227	-4.88046
ENSMUSG00000030092	Cntn6	protein_coding	MGI Symbol	5	contactin 6 [Source:MGI Symbol;Acc:MGI:1858223]	0.417821	0.726403	1.42182	0.160921	0.999227	-4.88396
ENSMUSG00000107272	Gm34583	transcribed_processed_pseudogene	MGI Symbol	3	predicted gene, 34583 [Source:MGI Symbol;Acc:MGI:5593742]	0.251385	4.83816	1.93086	0.0588414	0.999227	-4.88481
ENSMUSG00000087331	1810021B22Rik	antisense	MGI Symbol	5	RIKEN cDNA 1810021B22 gene [Source:MGI Symbol;Acc:MGI:1916370]	0.319775	0.82031	1.44912	0.153179	0.999227	-4.88485
ENSMUSG00000048163	Selplg	protein_coding	MGI Symbol	6	selectin, platelet (p-selectin) ligand [Source:MGI Symbol;Acc:MGI:106689]	-0.273713	4.37091	-1.92825	0.0591722	0.999227	-4.88504
ENSMUSG00000025809	Itgb1	protein_coding	MGI Symbol	4	integrin beta 1 (fibronectin receptor beta) [Source:MGI Symbol;Acc:MGI:96610]	-0.228814	3.83535	-1.86913	0.0671179	0.999227	-4.8853
ENSMUSG00000102059	Gm20257	transcribed_unprocessed_pseudogene	MGI Symbol	2	predicted gene, 20257 [Source:MGI Symbol;Acc:MGI:5012442]	-0.245888	1.98895	-1.66944	0.100911	0.999227	-4.88578
ENSMUSG00000035069	Oma1	protein_coding	MGI Symbol	3	OMA1 zinc metallopeptidase [Source:MGI Symbol;Acc:MGI:1914263]	-0.203001	3.37648	-1.82372	0.0738185	0.999227	-4.88604
ENSMUSG00000104671	Gm43062	lincRNA	MGI Symbol	1	predicted gene 43062 [Source:MGI Symbol;Acc:MGI:5663199]	0.385649	1.9097	1.6015	0.115194	0.999227	-4.88612
ENSMUSG00000073102	Drc1	protein_coding	MGI Symbol	4	dynein regulatory complex subunit 1 [Source:MGI Symbol;Acc:MGI:2685906]	0.252816	3.29192	1.78202	0.0804574	0.999227	-4.88676
ENSMUSG00000023259	Slc26a6	protein_coding	MGI Symbol	10	solute carrier family 26, member 6 [Source:MGI Symbol;Acc:MGI:2159728]	0.255182	2.67641	1.69492	0.0959426	0.999227	-4.88724
ENSMUSG00000014907	Naf1	protein_coding	MGI Symbol	2	nuclear assembly factor 1 ribonucleoprotein [Source:MGI Symbol;Acc:MGI:2682306]	0.242492	2.57174	1.69461	0.0960014	0.999227	-4.88738
ENSMUSG00000089628	Gm9727	processed_pseudogene	MGI Symbol	1	predicted gene 9727 [Source:MGI Symbol;Acc:MGI:3779431]	-0.342917	0.814499	-1.49861	0.139891	0.999227	-4.89048
ENSMUSG00000039050	Osbpl2	protein_coding	MGI Symbol	4	oxysterol binding protein-like 2 [Source:MGI Symbol;Acc:MGI:2442832]	-0.140354	5.53171	-1.99513	0.0511652	0.999227	-4.8912
ENSMUSG00000073436	Eme2	protein_coding	MGI Symbol	8	essential meiotic structure-specific endonuclease subunit 2 [Source:MGI Symbol;Acc:MGI:1919889]	0.315079	1.15432	1.45614	0.151235	0.999227	-4.89207
ENSMUSG00000061702	Tmem91	protein_coding	MGI Symbol	6	transmembrane protein 91 [Source:MGI Symbol;Acc:MGI:2443589]	0.28979	2.54804	1.68642	0.0975766	0.999227	-4.89229
ENSMUSG00000089737	Gm15688	antisense	MGI Symbol	1	predicted gene 15688 [Source:MGI Symbol;Acc:MGI:3647549]	-0.390336	0.450713	-1.4661	0.148511	0.999227	-4.89357
ENSMUSG00000044034	Npb	protein_coding	MGI Symbol	3	neuropeptide B [Source:MGI Symbol;Acc:MGI:2387153]	-0.351437	0.649117	-1.45744	0.150877	0.999227	-4.89374
ENSMUSG00000012443	Kif11	protein_coding	MGI Symbol	2	kinesin family member 11 [Source:MGI Symbol;Acc:MGI:1098231]	-0.430401	0.145087	-1.415	0.162899	0.999227	-4.89386
ENSMUSG00000040618	Pck2	protein_coding	MGI Symbol	13	phosphoenolpyruvate carboxykinase 2 (mitochondrial) [Source:MGI Symbol;Acc:MGI:1860456]	0.1925	5.27893	1.95872	0.055401	0.999227	-4.89396
ENSMUSG00000003062	Stard3nl	protein_coding	MGI Symbol	10	STARD3 N-terminal like [Source:MGI Symbol;Acc:MGI:1923455]	-0.136565	5.87417	-2.00942	0.0495817	0.999227	-4.89402
ENSMUSG00000095789	Nupr1l	protein_coding	MGI Symbol	4	nuclear protein transcriptional regulator 1 like [Source:MGI Symbol;Acc:MGI:1923099]	-0.813111	-1.48447	-1.25146	0.216248	0.999227	-4.89504
ENSMUSG00000055833	1700034H15Rik	antisense	MGI Symbol	6	RIKEN cDNA 1700034H15 gene [Source:MGI Symbol;Acc:MGI:1921515]	0.47116	-0.292141	1.21532	0.229614	0.999227	-4.89527
ENSMUSG00000108752	Gm45191	TEC	MGI Symbol	1	predicted gene 45191 [Source:MGI Symbol;Acc:MGI:5753767]	0.911068	-0.814066	1.13983	0.259467	0.999227	-4.89573
ENSMUSG00000063714	Sp3os	antisense	MGI Symbol	4	trans-acting transcription factor 3, opposite strand [Source:MGI Symbol;Acc:MGI:1914936]	-0.261167	2.6111	-1.74103	0.0874634	0.999227	-4.89633
ENSMUSG00000086725	A630052C17Rik	processed_transcript	MGI Symbol	1	RIKEN cDNA A630052C17 gene [Source:MGI Symbol;Acc:MGI:2444673]	0.270499	2.78014	1.71359	0.0924316	0.999227	-4.89684
ENSMUSG00000104033	Gm37773	TEC	MGI Symbol	1	predicted gene, 37773 [Source:MGI Symbol;Acc:MGI:5611001]	0.558551	-0.362984	1.2509	0.21645	0.999227	-4.8972
ENSMUSG00000105981	2810428J06Rik	TEC	MGI Symbol	1	RIKEN cDNA 2810428J06 gene [Source:MGI Symbol;Acc:MGI:1914308]	-0.421671	-0.42974	-1.33026	0.18911	0.999227	-4.8977
ENSMUSG00000109890	AU023762	lincRNA	MGI Symbol	5	expressed sequence AU023762 [Source:MGI Symbol;Acc:MGI:2143225]	0.654381	-0.248968	1.20022	0.235374	0.999227	-4.89872
ENSMUSG00000050619	Zscan29	protein_coding	MGI Symbol	5	zinc finger SCAN domains 29 [Source:MGI Symbol;Acc:MGI:2139317]	0.285996	2.64425	1.69378	0.0961601	0.999227	-4.90042
ENSMUSG00000051185	Fam174a	protein_coding	MGI Symbol	2	family with sequence similarity 174, member A [Source:MGI Symbol;Acc:MGI:1914948]	-0.213389	4.40232	-1.9202	0.0602044	0.999227	-4.90224
ENSMUSG00000087088	Gm16638	antisense	MGI Symbol	2	predicted gene, 16638 [Source:MGI Symbol;Acc:MGI:4439562]	0.345632	0.993769	1.45579	0.151332	0.999227	-4.90321
ENSMUSG00000062561	Gm10118	TEC	MGI Symbol	1	predicted gene 10118 [Source:MGI Symbol;Acc:MGI:3642340]	0.536935	-0.44312	1.21818	0.228535	0.999227	-4.90364
ENSMUSG00000097121	D130020L05Rik	antisense	MGI Symbol	5	RIKEN cDNA D130020L05 gene [Source:MGI Symbol;Acc:MGI:2450270]	0.237382	2.26557	1.64965	0.104912	0.999227	-4.90424
ENSMUSG00000059585	Ube2nl	processed_pseudogene	MGI Symbol	1	ubiquitin-conjugating enzyme E2N-like [Source:MGI Symbol;Acc:MGI:3643295]	0.287843	0.300285	1.36885	0.176804	0.999227	-4.90521
ENSMUSG00000043008	Klhl6	protein_coding	MGI Symbol	4	kelch-like 6 [Source:MGI Symbol;Acc:MGI:2686922]	0.388325	1.08846	1.47305	0.146634	0.999227	-4.90781
ENSMUSG00000071456	1110002L01Rik	antisense	MGI Symbol	4	RIKEN cDNA 1110002L01 gene [Source:MGI Symbol;Acc:MGI:1915821]	0.284419	1.15527	1.49278	0.141406	0.999227	-4.90917
ENSMUSG00000020898	Ctc1	protein_coding	MGI Symbol	12	CTS telomere maintenance complex component 1 [Source:MGI Symbol;Acc:MGI:1916214]	0.148564	4.69377	1.90737	0.0618822	0.999227	-4.90944
ENSMUSG00000108084	Gm7932	lincRNA	MGI Symbol	2	predicted gene 7932 [Source:MGI Symbol;Acc:MGI:3643446]	0.430891	-0.0519197	1.28651	0.20384	0.999227	-4.9102
ENSMUSG00000034640	Tiparp	protein_coding	MGI Symbol	3	TCDD-inducible poly(ADP-ribose) polymerase [Source:MGI Symbol;Acc:MGI:2159210]	0.253817	3.84354	1.83103	0.0727037	0.999227	-4.91028
ENSMUSG00000041309	Nkx6-2	protein_coding	MGI Symbol	2	NK6 homeobox 2 [Source:MGI Symbol;Acc:MGI:1352738]	-0.323879	1.38039	-1.57569	0.121031	0.999227	-4.91105
ENSMUSG00000048905	Bnip5	protein_coding	MGI Symbol	2	BCL2 interacting protein 5 [Source:MGI Symbol;Acc:MGI:1925441]	0.390369	0.680886	1.3904	0.170203	0.999227	-4.91122
ENSMUSG00000118093	Gm17802	processed_pseudogene	MGI Symbol	1	predicted gene, 17802 [Source:MGI Symbol;Acc:MGI:5009988]	-0.455127	-0.402018	-1.31044	0.19568	0.999227	-4.91361
ENSMUSG00000005950	P2rx5	protein_coding	MGI Symbol	3	purinergic receptor P2X, ligand-gated ion channel, 5 [Source:MGI Symbol;Acc:MGI:2137026]	-0.383202	-0.289961	-1.33343	0.188076	0.999227	-4.91372
ENSMUSG00000025795	Rassf3	protein_coding	MGI Symbol	2	Ras association (RalGDS/AF-6) domain family member 3 [Source:MGI Symbol;Acc:MGI:2179722]	-0.243505	2.86892	-1.76752	0.0828803	0.999227	-4.91405
ENSMUSG00000033436	Armcx2	protein_coding	MGI Symbol	7	armadillo repeat containing, X-linked 2 [Source:MGI Symbol;Acc:MGI:1914666]	0.179362	5.80107	1.98528	0.0522829	0.999227	-4.9141
ENSMUSG00000021390	Ogn	protein_coding	MGI Symbol	1	osteoglycin [Source:MGI Symbol;Acc:MGI:109278]	-0.5376	2.15696	-1.66844	0.101109	0.999227	-4.91556
ENSMUSG00000045140	Pigw	protein_coding	MGI Symbol	2	phosphatidylinositol glycan anchor biosynthesis, class W [Source:MGI Symbol;Acc:MGI:1917575]	-0.281237	1.23247	-1.52826	0.132378	0.999227	-4.91604
ENSMUSG00000030124	Lag3	protein_coding	MGI Symbol	2	lymphocyte-activation gene 3 [Source:MGI Symbol;Acc:MGI:106588]	-0.46223	1.09873	-1.563	0.123986	0.999227	-4.91671
ENSMUSG00000020385	Clk4	protein_coding	MGI Symbol	14	CDC like kinase 4 [Source:MGI Symbol;Acc:MGI:1098551]	0.188503	5.50138	1.96684	0.0544311	0.999227	-4.91751
ENSMUSG00000116678	Pgk1-ps1	processed_pseudogene	MGI Symbol	1	phosphoglycerate kinase 1, pseudogene 1 [Source:MGI Symbol;Acc:MGI:97556]	0.364353	0.0828777	1.32317	0.191442	0.999227	-4.91762
ENSMUSG00000097141	Gm10524	TEC	MGI Symbol	1	predicted gene 10524 [Source:MGI Symbol;Acc:MGI:3642791]	0.339822	-0.246167	1.2525	0.215869	0.999227	-4.91861
ENSMUSG00000033450	Tagap	protein_coding	MGI Symbol	2	T cell activation Rho GTPase activating protein [Source:MGI Symbol;Acc:MGI:3615484]	0.299952	1.35322	1.49973	0.139601	0.999227	-4.92153
ENSMUSG00000035778	Ggta1	protein_coding	MGI Symbol	9	glycoprotein galactosyltransferase alpha 1, 3 [Source:MGI Symbol;Acc:MGI:95704]	-0.481721	0.0524439	-1.37925	0.173592	0.999227	-4.92345
ENSMUSG00000050222	Il17d	protein_coding	MGI Symbol	1	interleukin 17D [Source:MGI Symbol;Acc:MGI:2446510]	-0.28667	1.54585	-1.5973	0.116128	0.999227	-4.92435
ENSMUSG00000034035	Ccdc17	protein_coding	MGI Symbol	5	coiled-coil domain containing 17 [Source:MGI Symbol;Acc:MGI:1915667]	0.328197	1.33646	1.48674	0.14299	0.999227	-4.9248
ENSMUSG00000026657	Frmd4a	protein_coding	MGI Symbol	20	FERM domain containing 4A [Source:MGI Symbol;Acc:MGI:1919850]	-0.174106	4.69942	-1.92342	0.0597906	0.999227	-4.92496
ENSMUSG00000068699	Flnc	protein_coding	MGI Symbol	3	filamin C, gamma [Source:MGI Symbol;Acc:MGI:95557]	-0.445021	-0.452163	-1.28852	0.203147	0.999227	-4.92565
ENSMUSG00000033502	Cdc14a	protein_coding	MGI Symbol	8	CDC14 cell division cycle 14A [Source:MGI Symbol;Acc:MGI:2442676]	-0.298537	0.695867	-1.45589	0.151304	0.999227	-4.92586
ENSMUSG00000033633	Clec18a	protein_coding	MGI Symbol	7	C-type lectin domain family 18, member A [Source:MGI Symbol;Acc:MGI:2672935]	0.491801	0.272657	1.28631	0.203908	0.999227	-4.92592
ENSMUSG00000078958	Atp6ap1l	protein_coding	MGI Symbol	5	ATPase, H+ transporting, lysosomal accessory protein 1-like [Source:MGI Symbol;Acc:MGI:3648665]	0.331617	-0.0444826	1.27629	0.207399	0.999227	-4.92599
ENSMUSG00000047793	Sned1	protein_coding	MGI Symbol	6	sushi, nidogen and EGF-like domains 1 [Source:MGI Symbol;Acc:MGI:3045960]	-0.404358	1.05728	-1.52126	0.134121	0.999227	-4.92627
ENSMUSG00000030111	A2m	protein_coding	MGI Symbol	3	alpha-2-macroglobulin [Source:MGI Symbol;Acc:MGI:2449119]	0.7156	0.0417245	1.23229	0.223265	0.999227	-4.92629
ENSMUSG00000027573	Gid8	protein_coding	MGI Symbol	3	GID complex subunit 8 [Source:MGI Symbol;Acc:MGI:1923675]	-0.136381	4.97577	-1.94339	0.0572716	0.999227	-4.92655
ENSMUSG00000004105	Angptl2	protein_coding	MGI Symbol	4	angiopoietin-like 2 [Source:MGI Symbol;Acc:MGI:1347002]	-0.613781	-0.107132	-1.34559	0.184147	0.999227	-4.92683
ENSMUSG00000019806	Aig1	protein_coding	MGI Symbol	7	androgen-induced 1 [Source:MGI Symbol;Acc:MGI:1913503]	-0.169127	4.84151	-1.93519	0.0582942	0.999227	-4.92692
ENSMUSG00000003665	Has1	protein_coding	MGI Symbol	2	hyaluronan synthase 1 [Source:MGI Symbol;Acc:MGI:106590]	-0.480702	-0.378518	-1.3045	0.197682	0.999227	-4.92711
ENSMUSG00000059327	Eda	protein_coding	MGI Symbol	12	ectodysplasin-A [Source:MGI Symbol;Acc:MGI:1195272]	-0.366525	0.760508	-1.48288	0.14401	0.999227	-4.9272
ENSMUSG00000031486	Adgra2	protein_coding	MGI Symbol	4	adhesion G protein-coupled receptor A2 [Source:MGI Symbol;Acc:MGI:1925810]	-0.406645	0.742764	-1.47279	0.146705	0.999227	-4.92791
ENSMUSG00000070000	Fcho1	protein_coding	MGI Symbol	12	FCH domain only 1 [Source:MGI Symbol;Acc:MGI:1921265]	-0.239545	4.43352	-1.90738	0.0618809	0.999227	-4.92816
ENSMUSG00000021448	Shc3	protein_coding	MGI Symbol	4	src homology 2 domain-containing transforming protein C3 [Source:MGI Symbol;Acc:MGI:106179]	0.280994	1.88703	1.56723	0.122995	0.999227	-4.9285
ENSMUSG00000074635	3110070M22Rik	antisense	MGI Symbol	2	RIKEN cDNA 3110070M22 gene [Source:MGI Symbol;Acc:MGI:1914554]	0.409567	1.04105	1.45127	0.152581	0.999227	-4.93172
ENSMUSG00000056656	Apol8	protein_coding	MGI Symbol	5	apolipoprotein L 8 [Source:MGI Symbol;Acc:MGI:2444921]	-0.284855	2.52235	-1.7042	0.094183	0.999227	-4.93379
ENSMUSG00000072258	Taf1a	protein_coding	MGI Symbol	3	TATA-box binding protein associated factor, RNA polymerase I, A [Source:MGI Symbol;Acc:MGI:109578]	0.209531	3.43592	1.77449	0.0817094	0.999227	-4.9341
ENSMUSG00000074867	Zfp808	protein_coding	MGI Symbol	7	zinc finger protein 808 [Source:MGI Symbol;Acc:MGI:3704127]	0.349444	0.671286	1.39055	0.170158	0.999227	-4.93466
ENSMUSG00000049796	Crh	protein_coding	MGI Symbol	1	corticotropin releasing hormone [Source:MGI Symbol;Acc:MGI:88496]	-0.685172	-1.00302	-1.26378	0.211824	0.999227	-4.93532
ENSMUSG00000042345	Ubash3a	protein_coding	MGI Symbol	9	ubiquitin associated and SH3 domain containing, A [Source:MGI Symbol;Acc:MGI:1926074]	0.404333	0.786406	1.39811	0.167886	0.999227	-4.93574
ENSMUSG00000037946	Fgd3	protein_coding	MGI Symbol	3	FYVE, RhoGEF and PH domain containing 3 [Source:MGI Symbol;Acc:MGI:1353657]	-0.286867	1.29917	-1.53805	0.129968	0.999227	-4.93688
ENSMUSG00000034826	Nup54	protein_coding	MGI Symbol	8	nucleoporin 54 [Source:MGI Symbol;Acc:MGI:1920460]	0.203942	4.54574	1.88256	0.0652381	0.999227	-4.93755
ENSMUSG00000022131	Gpr180	protein_coding	MGI Symbol	1	G protein-coupled receptor 180 [Source:MGI Symbol;Acc:MGI:1930949]	-0.283042	2.69643	-1.72073	0.0911161	0.999227	-4.93781
ENSMUSG00000072844	G530011O06Rik	processed_transcript	MGI Symbol	1	RIKEN cDNA G530011O06 gene [Source:MGI Symbol;Acc:MGI:3603513]	0.835838	0.68628	1.38741	0.171105	0.999227	-4.94007
ENSMUSG00000036256	Igfbp7	protein_coding	MGI Symbol	2	insulin-like growth factor binding protein 7 [Source:MGI Symbol;Acc:MGI:1352480]	-0.577663	-0.501019	-1.32347	0.191345	0.999227	-4.94013
ENSMUSG00000019861	Gopc	protein_coding	MGI Symbol	6	golgi associated PDZ and coiled-coil motif containing [Source:MGI Symbol;Acc:MGI:2149946]	-0.146335	5.10196	-1.94462	0.0571193	0.999227	-4.94092
ENSMUSG00000057157	Gm6054	processed_pseudogene	MGI Symbol	1	predicted gene 6054 [Source:MGI Symbol;Acc:MGI:3645581]	0.290446	0.459422	1.34233	0.185194	0.999227	-4.94243
ENSMUSG00000089941	Gm16168	antisense	MGI Symbol	2	predicted gene 16168 [Source:MGI Symbol;Acc:MGI:3802010]	-0.403485	-0.4374	-1.29902	0.199544	0.999227	-4.94477
ENSMUSG00000036814	Slc6a20a	protein_coding	MGI Symbol	3	solute carrier family 6 (neurotransmitter transporter), member 20A [Source:MGI Symbol;Acc:MGI:2143217]	-0.492834	1.68701	-1.60317	0.114823	0.999227	-4.94644
ENSMUSG00000071181	3830408C21Rik	processed_transcript	MGI Symbol	6	RIKEN cDNA 3830408C21 gene [Source:MGI Symbol;Acc:MGI:1917940]	0.224231	2.11394	1.5966	0.116284	0.999227	-4.94981
ENSMUSG00000117768	8030456M14Rik	bidirectional_promoter_lncRNA	MGI Symbol	1	RIKEN cDNA 8030456M14 gene [Source:MGI Symbol;Acc:MGI:1924742]	-0.34621	0.263972	-1.39591	0.168544	0.999227	-4.95071
ENSMUSG00000025533	Asl	protein_coding	MGI Symbol	8	argininosuccinate lyase [Source:MGI Symbol;Acc:MGI:88084]	0.241617	4.65613	1.88226	0.0652791	0.999227	-4.95093
ENSMUSG00000026389	Steap3	protein_coding	MGI Symbol	5	STEAP family member 3 [Source:MGI Symbol;Acc:MGI:1915678]	-0.342056	1.8414	-1.62477	0.110126	0.999227	-4.9514
ENSMUSG00000025038	Efhc2	protein_coding	MGI Symbol	1	EF-hand domain (C-terminal) containing 2 [Source:MGI Symbol;Acc:MGI:1921655]	-0.381731	1.30767	-1.54965	0.127159	0.999227	-4.95171
ENSMUSG00000083086	Gm15531	processed_pseudogene	MGI Symbol	1	predicted gene 15531 [Source:MGI Symbol;Acc:MGI:3782979]	0.357056	-0.297453	1.22355	0.226519	0.999227	-4.95181
ENSMUSG00000058145	Adamts17	protein_coding	MGI Symbol	8	a disintegrin-like and metallopeptidase (reprolysin type) with thrombospondin type 1 motif, 17 [Source:MGI Symbol;Acc:MGI:3588195]	-0.268821	1.71585	-1.58235	0.119501	0.999227	-4.95202
ENSMUSG00000098274	Rpl24	protein_coding	MGI Symbol	4	ribosomal protein L24 [Source:MGI Symbol;Acc:MGI:1915443]	0.276404	1.09674	1.44857	0.153331	0.999227	-4.95288
ENSMUSG00000032495	Lrrc2	protein_coding	MGI Symbol	3	leucine rich repeat containing 2 [Source:MGI Symbol;Acc:MGI:1921499]	0.289802	1.58582	1.51707	0.135173	0.999227	-4.95324
ENSMUSG00000019880	Rspo3	protein_coding	MGI Symbol	2	R-spondin 3 [Source:MGI Symbol;Acc:MGI:1920030]	-0.207601	2.89484	-1.73401	0.0887129	0.999227	-4.95334
ENSMUSG00000039985	Sinhcaf	protein_coding	MGI Symbol	12	SIN3-HDAC complex associated factor [Source:MGI Symbol;Acc:MGI:1929091]	0.444317	0.501595	1.32537	0.190716	0.999227	-4.95468
ENSMUSG00000004865	Srpk1	protein_coding	MGI Symbol	13	serine/arginine-rich protein specific kinase 1 [Source:MGI Symbol;Acc:MGI:106908]	0.121916	7.10831	2.00349	0.0502335	0.999227	-4.95529
ENSMUSG00000031352	Hccs	protein_coding	MGI Symbol	3	holocytochrome c synthetase [Source:MGI Symbol;Acc:MGI:106911]	-0.145343	4.39738	-1.88366	0.0650854	0.999227	-4.95575
ENSMUSG00000068114	Ccdc134	protein_coding	MGI Symbol	7	coiled-coil domain containing 134 [Source:MGI Symbol;Acc:MGI:1923707]	0.316101	3.15484	1.71316	0.0925095	0.999227	-4.95601
ENSMUSG00000072872	Rybp	protein_coding	MGI Symbol	3	RING1 and YY1 binding protein [Source:MGI Symbol;Acc:MGI:1929059]	0.194369	3.96895	1.8173	0.07481	0.999227	-4.95608
ENSMUSG00000048058	Ldlrad3	protein_coding	MGI Symbol	3	low density lipoprotein receptor class A domain containing 3 [Source:MGI Symbol;Acc:MGI:2138856]	-0.289119	2.66893	-1.71131	0.0928541	0.999227	-4.95701
ENSMUSG00000105983	Gm42770	TEC	MGI Symbol	1	predicted gene 42770 [Source:MGI Symbol;Acc:MGI:5662907]	0.42296	0.527923	1.3256	0.190643	0.999227	-4.95723
ENSMUSG00000010538	Tsacc	protein_coding	MGI Symbol	3	TSSK6 activating co-chaperone [Source:MGI Symbol;Acc:MGI:1924177]	-0.261841	0.835843	-1.44431	0.15452	0.999227	-4.95774
ENSMUSG00000038058	Nod1	protein_coding	MGI Symbol	6	nucleotide-binding oligomerization domain containing 1 [Source:MGI Symbol;Acc:MGI:1341839]	-0.337611	1.23536	-1.52585	0.132975	0.999227	-4.95839
ENSMUSG00000024120	Lrpprc	protein_coding	MGI Symbol	7	leucine-rich PPR-motif containing [Source:MGI Symbol;Acc:MGI:1919666]	0.150778	5.47618	1.94549	0.0570126	0.999227	-4.95888
ENSMUSG00000033579	Fa2h	protein_coding	MGI Symbol	4	fatty acid 2-hydroxylase [Source:MGI Symbol;Acc:MGI:2443327]	-0.309376	4.23005	-1.873	0.066572	0.999227	-4.95923
ENSMUSG00000084129	Hmgb1-ps1	processed_pseudogene	MGI Symbol	1	high mobility group box 1, pseudogene 1 [Source:MGI Symbol;Acc:MGI:3768536]	-0.297653	-0.34306	-1.28361	0.204847	0.999227	-4.95963
ENSMUSG00000026959	Grin1	protein_coding	MGI Symbol	14	glutamate receptor, ionotropic, NMDA1 (zeta 1) [Source:MGI Symbol;Acc:MGI:95819]	-0.369291	5.22786	-1.9508	0.0563603	0.999227	-4.95999
ENSMUSG00000043110	Lrrn4	protein_coding	MGI Symbol	1	leucine rich repeat neuronal 4 [Source:MGI Symbol;Acc:MGI:2445154]	-0.398423	0.848952	-1.47292	0.146669	0.999227	-4.96
ENSMUSG00000039004	Bmp6	protein_coding	MGI Symbol	3	bone morphogenetic protein 6 [Source:MGI Symbol;Acc:MGI:88182]	-0.468803	0.809099	-1.46987	0.147492	0.999227	-4.96023
ENSMUSG00000067203	H2-K2	transcribed_unprocessed_pseudogene	MGI Symbol	2	histocompatibility 2, K region locus 2 [Source:MGI Symbol;Acc:MGI:95906]	-0.454109	0.216105	-1.39592	0.168542	0.999227	-4.96077
ENSMUSG00000108883	Gm44623	antisense	MGI Symbol	1	predicted gene 44623 [Source:MGI Symbol;Acc:MGI:5753199]	0.335421	0.308435	1.31341	0.194687	0.999227	-4.96422
ENSMUSG00000024679	Ms4a6d	protein_coding	MGI Symbol	4	membrane-spanning 4-domains, subfamily A, member 6D [Source:MGI Symbol;Acc:MGI:1916024]	-0.429818	-0.3851	-1.26192	0.212485	0.999227	-4.96511
ENSMUSG00000020734	Grin2c	protein_coding	MGI Symbol	2	glutamate receptor, ionotropic, NMDA2C (epsilon 3) [Source:MGI Symbol;Acc:MGI:95822]	-0.352164	1.00566	-1.47602	0.145837	0.999227	-4.96741
ENSMUSG00000021892	Sh3bp5	protein_coding	MGI Symbol	4	SH3-domain binding protein 5 (BTK-associated) [Source:MGI Symbol;Acc:MGI:1344391]	-0.29249	7.05605	-1.99999	0.0506217	0.999227	-4.969
ENSMUSG00000017400	Stac2	protein_coding	MGI Symbol	2	SH3 and cysteine rich domain 2 [Source:MGI Symbol;Acc:MGI:2144518]	0.191742	5.25343	1.92165	0.0600182	0.999227	-4.96968
ENSMUSG00000097216	4932441J04Rik	processed_transcript	MGI Symbol	2	RIKEN cDNA 4932441J04 gene [Source:MGI Symbol;Acc:MGI:2441691]	0.322879	0.255406	1.28374	0.2048	0.999227	-4.96978
ENSMUSG00000032997	Chpf	protein_coding	MGI Symbol	5	chondroitin polymerizing factor [Source:MGI Symbol;Acc:MGI:106576]	-0.22951	5.28904	-1.94381	0.0572204	0.999227	-4.9706
ENSMUSG00000071753	Cdr1os	lincRNA	MGI Symbol	9	cerebellar degeneration related antigen 1, opposite strand [Source:MGI Symbol;Acc:MGI:5637821]	0.170866	7.34629	1.99783	0.0508632	0.999227	-4.97064
ENSMUSG00000033007	Asic4	protein_coding	MGI Symbol	2	acid-sensing (proton-gated) ion channel family member 4 [Source:MGI Symbol;Acc:MGI:2652846]	-0.41673	0.669409	-1.46083	0.149947	0.999227	-4.97072
ENSMUSG00000059658	Gm16379	processed_pseudogene	MGI Symbol	1	predicted pseudogene 16379 [Source:MGI Symbol;Acc:MGI:3647120]	-0.29107	0.791163	-1.43614	0.156823	0.999227	-4.97082
ENSMUSG00000090877	Hspa1b	protein_coding	MGI Symbol	1	heat shock protein 1B [Source:MGI Symbol;Acc:MGI:99517]	0.271854	0.789836	1.39171	0.169808	0.999227	-4.972
ENSMUSG00000051606	2010001K21Rik	processed_transcript	MGI Symbol	4	RIKEN cDNA 2010001K21 gene [Source:MGI Symbol;Acc:MGI:1917079]	-0.446248	-0.181377	-1.29209	0.201914	0.999227	-4.97412
ENSMUSG00000082768	Gm12727	processed_pseudogene	MGI Symbol	1	predicted gene 12727 [Source:MGI Symbol;Acc:MGI:3649747]	-0.271503	0.15244	-1.34626	0.183932	0.999227	-4.97459
ENSMUSG00000083757	Rps15a-ps4	transcribed_processed_pseudogene	MGI Symbol	2	ribosomal protein S15A, pseudogene 4 [Source:MGI Symbol;Acc:MGI:3652187]	0.279789	0.310931	1.31323	0.194747	0.999227	-4.97565
ENSMUSG00000098424	Gm27202	lincRNA	MGI Symbol	1	predicted gene 27202 [Source:MGI Symbol;Acc:MGI:5521045]	0.462895	-0.143843	1.21407	0.230086	0.999227	-4.97616
ENSMUSG00000030867	Plk1	protein_coding	MGI Symbol	3	polo like kinase 1 [Source:MGI Symbol;Acc:MGI:97621]	-0.452745	-0.521133	-1.2753	0.207747	0.999227	-4.97637
ENSMUSG00000038147	Cd84	protein_coding	MGI Symbol	5	CD84 antigen [Source:MGI Symbol;Acc:MGI:1336885]	-0.357026	0.687247	-1.41941	0.161617	0.999227	-4.97639
ENSMUSG00000063632	Sox11	protein_coding	MGI Symbol	1	SRY (sex determining region Y)-box 11 [Source:MGI Symbol;Acc:MGI:98359]	0.254482	6.32706	1.96996	0.0540629	0.999227	-4.97711
ENSMUSG00000028337	Coro2a	protein_coding	MGI Symbol	7	coronin, actin binding protein 2A [Source:MGI Symbol;Acc:MGI:1345966]	0.246694	2.95515	1.67683	0.0994477	0.999227	-4.9772
ENSMUSG00000085882	2610507I01Rik	processed_transcript	MGI Symbol	1	RIKEN cDNA 2610507I01 gene [Source:MGI Symbol;Acc:MGI:1919453]	0.206677	3.50274	1.7544	0.0851252	0.999227	-4.97746
ENSMUSG00000053093	Myh7	protein_coding	MGI Symbol	8	myosin, heavy polypeptide 7, cardiac muscle, beta [Source:MGI Symbol;Acc:MGI:2155600]	0.349863	1.26159	1.42003	0.161437	0.999227	-4.97833
ENSMUSG00000033707	Lrrc24	protein_coding	MGI Symbol	3	leucine rich repeat containing 24 [Source:MGI Symbol;Acc:MGI:3605040]	-0.239188	1.91446	-1.59502	0.116637	0.999227	-4.98144
ENSMUSG00000098051	Gm27032	lincRNA	MGI Symbol	1	predicted gene, 27032 [Source:MGI Symbol;Acc:MGI:5504147]	-0.473429	1.67288	-1.5998	0.11557	0.999227	-4.98201
ENSMUSG00000017737	Mmp9	protein_coding	MGI Symbol	4	matrix metallopeptidase 9 [Source:MGI Symbol;Acc:MGI:97011]	-0.36478	0.278253	-1.35918	0.179827	0.999227	-4.98212
ENSMUSG00000117256	Gm5497	processed_pseudogene	MGI Symbol	1	predicted gene 5497 [Source:MGI Symbol;Acc:MGI:3646432]	-0.317983	0.260824	-1.33769	0.186692	0.999227	-4.98213
ENSMUSG00000083465	Gm11652	processed_pseudogene	MGI Symbol	1	predicted gene 11652 [Source:MGI Symbol;Acc:MGI:3651204]	0.277819	0.622358	1.34603	0.184004	0.999227	-4.98344
ENSMUSG00000106391	Gm42690	TEC	MGI Symbol	1	predicted gene 42690 [Source:MGI Symbol;Acc:MGI:5662827]	-0.35056	0.424723	-1.37833	0.173875	0.999227	-4.98374
ENSMUSG00000045822	Zswim3	protein_coding	MGI Symbol	1	zinc finger SWIM-type containing 3 [Source:MGI Symbol;Acc:MGI:1914788]	0.24228	3.48508	1.74	0.0876453	0.999227	-4.98401
ENSMUSG00000059149	Mfsd4a	protein_coding	MGI Symbol	13	major facilitator superfamily domain containing 4A [Source:MGI Symbol;Acc:MGI:2442786]	-0.251258	6.56686	-1.98241	0.0526119	0.999227	-4.98424
ENSMUSG00000035914	Cd276	protein_coding	MGI Symbol	4	CD276 antigen [Source:MGI Symbol;Acc:MGI:2183926]	0.296577	2.23873	1.59194	0.117328	0.999227	-4.98437
ENSMUSG00000099966	2810402E24Rik	antisense	MGI Symbol	1	RIKEN cDNA 2810402E24 gene [Source:MGI Symbol;Acc:MGI:1913715]	-0.238146	2.44556	-1.6576	0.103288	0.999227	-4.98549
ENSMUSG00000102478	BC085271	transcribed_processed_pseudogene	MGI Symbol	2	cDNA sequence BC085271 [Source:MGI Symbol;Acc:MGI:3612444]	0.272286	0.212013	1.27989	0.206143	0.999227	-4.98612
ENSMUSG00000091476	Catspere2	protein_coding	MGI Symbol	6	cation channel sperm associated auxiliary subunit epsilon 2 [Source:MGI Symbol;Acc:MGI:5589632]	-0.40377	-0.293093	-1.22771	0.224964	0.999227	-4.98685
ENSMUSG00000000486	Septin1	protein_coding	MGI Symbol	10	septin 1 [Source:MGI Symbol;Acc:MGI:1858916]	-0.273007	2.26788	-1.65305	0.104215	0.999227	-4.98718
ENSMUSG00000015748	Prpf3	protein_coding	MGI Symbol	9	pre-mRNA processing factor 3 [Source:MGI Symbol;Acc:MGI:1918017]	0.201587	4.39885	1.8402	0.071324	0.999227	-4.98798
ENSMUSG00000090129	Olfr287	protein_coding	MGI Symbol	5	olfactory receptor 287 [Source:MGI Symbol;Acc:MGI:3030121]	0.311194	2.02797	1.56315	0.123951	0.999227	-4.98888
ENSMUSG00000042476	Abcb4	protein_coding	MGI Symbol	5	ATP-binding cassette, sub-family B (MDR/TAP), member 4 [Source:MGI Symbol;Acc:MGI:97569]	0.34654	1.19744	1.41008	0.164341	0.999227	-4.98978
ENSMUSG00000072437	Nanos1	protein_coding	MGI Symbol	1	nanos C2HC-type zinc finger 1 [Source:MGI Symbol;Acc:MGI:2669254]	0.172772	4.00364	1.80835	0.0762105	0.999227	-4.99182
ENSMUSG00000104951	Gm43413	TEC	MGI Symbol	1	predicted gene 43413 [Source:MGI Symbol;Acc:MGI:5663550]	0.605639	1.01466	1.34735	0.183582	0.999227	-4.99304
ENSMUSG00000058571	Gpc6	protein_coding	MGI Symbol	4	glypican 6 [Source:MGI Symbol;Acc:MGI:1346322]	-0.30315	1.12467	-1.46405	0.149068	0.999227	-4.99378
ENSMUSG00000048215	A630023P12Rik	lincRNA	MGI Symbol	5	RIKEN cDNA A630023P12 gene [Source:MGI Symbol;Acc:MGI:2445162]	0.456494	-0.210153	1.17998	0.243263	0.999227	-4.99389
ENSMUSG00000015189	Casd1	protein_coding	MGI Symbol	5	CAS1 domain containing 1 [Source:MGI Symbol;Acc:MGI:2384865]	-0.227348	5.08755	-1.91459	0.0609329	0.999227	-4.99525
ENSMUSG00000021906	Oxnad1	protein_coding	MGI Symbol	13	oxidoreductase NAD-binding domain containing 1 [Source:MGI Symbol;Acc:MGI:1916953]	0.20406	4.48709	1.84717	0.0702913	0.999227	-4.99819
ENSMUSG00000048029	Eno4	protein_coding	MGI Symbol	4	enolase 4 [Source:MGI Symbol;Acc:MGI:2441717]	0.493619	0.741559	1.31983	0.192548	0.999227	-4.99921
ENSMUSG00000092540	Gm8738	processed_pseudogene	MGI Symbol	1	predicted gene 8738 [Source:MGI Symbol;Acc:MGI:3644778]	0.365755	0.0349587	1.2323	0.223261	0.999227	-5.00189
ENSMUSG00000114295	Gm2534	processed_pseudogene	MGI Symbol	1	predicted gene 2534 [Source:MGI Symbol;Acc:MGI:3780702]	0.350657	0.0905156	1.23133	0.22362	0.999227	-5.00269
ENSMUSG00000047496	Rnf152	protein_coding	MGI Symbol	2	ring finger protein 152 [Source:MGI Symbol;Acc:MGI:2443787]	-0.300297	2.08758	-1.59591	0.116437	0.999227	-5.00276
ENSMUSG00000093553	Gm20633	antisense	MGI Symbol	1	predicted gene 20633 [Source:MGI Symbol;Acc:MGI:5313080]	0.500849	-0.190399	1.19616	0.236943	0.999227	-5.00299
ENSMUSG00000036768	Kif15	protein_coding	MGI Symbol	17	kinesin family member 15 [Source:MGI Symbol;Acc:MGI:1098258]	0.398768	-0.285545	1.16944	0.247443	0.999227	-5.00396
ENSMUSG00000020843	Timm22	protein_coding	MGI Symbol	4	translocase of inner mitochondrial membrane 22 [Source:MGI Symbol;Acc:MGI:1929742]	0.153669	5.80212	1.93474	0.058351	0.999227	-5.0054
ENSMUSG00000008318	Relt	protein_coding	MGI Symbol	6	RELT tumor necrosis factor receptor [Source:MGI Symbol;Acc:MGI:2443373]	-0.31257	2.20432	-1.63316	0.108345	0.999227	-5.00547
ENSMUSG00000091754	Gm3636	protein_coding	MGI Symbol	2	predicted gene 3636 [Source:MGI Symbol;Acc:MGI:3781812]	0.301114	1.34752	1.43936	0.155911	0.999227	-5.0055
ENSMUSG00000029687	Ezh2	protein_coding	MGI Symbol	15	enhancer of zeste 2 polycomb repressive complex 2 subunit [Source:MGI Symbol;Acc:MGI:107940]	0.25981	2.50723	1.61916	0.111332	0.999227	-5.00551
ENSMUSG00000116972	Gm6278	processed_pseudogene	MGI Symbol	1	predicted gene 6278 [Source:MGI Symbol;Acc:MGI:3644862]	0.242907	1.52104	1.48202	0.144239	0.999227	-5.00678
ENSMUSG00000024778	Fas	protein_coding	MGI Symbol	5	Fas (TNF receptor superfamily member 6) [Source:MGI Symbol;Acc:MGI:95484]	-0.457649	-0.168078	-1.26741	0.210533	0.999227	-5.00742
ENSMUSG00000032324	Tspan3	protein_coding	MGI Symbol	5	tetraspanin 3 [Source:MGI Symbol;Acc:MGI:1928098]	-0.333924	7.69524	-1.98687	0.0521013	0.999227	-5.00792
ENSMUSG00000021069	Pygl	protein_coding	MGI Symbol	6	liver glycogen phosphorylase [Source:MGI Symbol;Acc:MGI:97829]	0.33315	1.73566	1.4817	0.144323	0.999227	-5.0112
ENSMUSG00000105922	Gm42769	TEC	MGI Symbol	1	predicted gene 42769 [Source:MGI Symbol;Acc:MGI:5662906]	0.578583	1.29933	1.37707	0.174262	0.999227	-5.01142
ENSMUSG00000020732	Rab37	protein_coding	MGI Symbol	4	RAB37, member RAS oncogene family [Source:MGI Symbol;Acc:MGI:1929945]	0.297257	1.73183	1.49114	0.141837	0.999227	-5.01217
ENSMUSG00000002668	Dennd1c	protein_coding	MGI Symbol	7	DENN/MADD domain containing 1C [Source:MGI Symbol;Acc:MGI:1918035]	0.517513	-0.473207	1.12638	0.265065	0.999227	-5.01237
ENSMUSG00000106321	Gm43674	lincRNA	MGI Symbol	1	predicted gene 43674 [Source:MGI Symbol;Acc:MGI:5663811]	0.331555	0.0379735	1.22476	0.226064	0.999227	-5.01248
ENSMUSG00000062044	Lmtk3	protein_coding	MGI Symbol	9	lemur tyrosine kinase 3 [Source:MGI Symbol;Acc:MGI:3039582]	-0.298672	2.12587	-1.61088	0.113129	0.999227	-5.01267
ENSMUSG00000097814	Panct2	antisense	MGI Symbol	3	pluripotency-associated noncoding transcript 2 [Source:MGI Symbol;Acc:MGI:3643517]	-0.294751	1.19243	-1.46232	0.149541	0.999227	-5.01324
ENSMUSG00000041147	Brca2	protein_coding	MGI Symbol	14	breast cancer 2, early onset [Source:MGI Symbol;Acc:MGI:109337]	0.277225	2.52385	1.60604	0.114189	0.999227	-5.01427
ENSMUSG00000063531	Sema3e	protein_coding	MGI Symbol	3	sema domain, immunoglobulin domain (Ig), short basic domain, secreted, (semaphorin) 3E [Source:MGI Symbol;Acc:MGI:1340034]	-0.277338	4.89365	-1.88766	0.0645351	0.999227	-5.01435
ENSMUSG00000026803	Ttf1	protein_coding	MGI Symbol	4	transcription termination factor, RNA polymerase I [Source:MGI Symbol;Acc:MGI:105044]	0.18559	3.53238	1.74154	0.0873741	0.999227	-5.01454
ENSMUSG00000106706	C530043K16Rik	TEC	MGI Symbol	1	RIKEN cDNA C530043K16 gene [Source:MGI Symbol;Acc:MGI:2444587]	0.530661	0.491925	1.25457	0.215124	0.999227	-5.01463
ENSMUSG00000041429	Nthl1	protein_coding	MGI Symbol	5	nth (endonuclease III)-like 1 (E.coli) [Source:MGI Symbol;Acc:MGI:1313275]	0.263956	2.04781	1.54637	0.127949	0.999227	-5.01584
ENSMUSG00000085415	Selenok-ps1	processed_transcript	MGI Symbol	1	selenoprotein K, pseudogene 1 [Source:MGI Symbol;Acc:MGI:3649370]	0.321668	0.113804	1.24436	0.218827	0.999227	-5.01609
ENSMUSG00000021773	Comtd1	protein_coding	MGI Symbol	4	catechol-O-methyltransferase domain containing 1 [Source:MGI Symbol;Acc:MGI:1916406]	-0.261983	1.47949	-1.50888	0.137252	0.999227	-5.01625
ENSMUSG00000015652	Steap1	protein_coding	MGI Symbol	2	six transmembrane epithelial antigen of the prostate 1 [Source:MGI Symbol;Acc:MGI:1917608]	-1.12421	-1.22026	-1.20471	0.23365	0.999227	-5.0168
ENSMUSG00000004415	Col26a1	protein_coding	MGI Symbol	11	collagen, type XXVI, alpha 1 [Source:MGI Symbol;Acc:MGI:2155345]	-0.475697	-0.448741	-1.19962	0.235608	0.999227	-5.01697
ENSMUSG00000031497	Tnfsf13b	protein_coding	MGI Symbol	6	tumor necrosis factor (ligand) superfamily, member 13b [Source:MGI Symbol;Acc:MGI:1344376]	-0.319999	0.54502	-1.34752	0.183528	0.999227	-5.01716
ENSMUSG00000054457	9430021M05Rik	processed_transcript	MGI Symbol	1	RIKEN cDNA 9430021M05 gene [Source:MGI Symbol;Acc:MGI:1924538]	-0.326132	0.237095	-1.31288	0.194864	0.999227	-5.0172
ENSMUSG00000036446	Lum	protein_coding	MGI Symbol	1	lumican [Source:MGI Symbol;Acc:MGI:109347]	-0.464767	1.34211	-1.51302	0.136197	0.999227	-5.0215
ENSMUSG00000048776	Pthlh	protein_coding	MGI Symbol	2	parathyroid hormone-like peptide [Source:MGI Symbol;Acc:MGI:97800]	-0.319501	1.24348	-1.4853	0.14337	0.999227	-5.02156
ENSMUSG00000020788	Atp2a3	protein_coding	MGI Symbol	7	ATPase, Ca++ transporting, ubiquitous [Source:MGI Symbol;Acc:MGI:1194503]	-0.452393	-0.210806	-1.25181	0.21612	0.999227	-5.02217
ENSMUSG00000060791	Gmfg	protein_coding	MGI Symbol	5	glia maturation factor, gamma [Source:MGI Symbol;Acc:MGI:1927135]	0.29767	0.947463	1.36793	0.177088	0.999227	-5.02301
ENSMUSG00000028654	Mycl	protein_coding	MGI Symbol	5	v-myc avian myelocytomatosis viral oncogene lung carcinoma derived [Source:MGI Symbol;Acc:MGI:96799]	-0.188199	4.45578	-1.85338	0.0693806	0.999227	-5.02344
ENSMUSG00000035274	Tpbg	protein_coding	MGI Symbol	3	trophoblast glycoprotein [Source:MGI Symbol;Acc:MGI:1341264]	-0.384327	0.629966	-1.37693	0.174305	0.999227	-5.02358
ENSMUSG00000049551	Fzd9	protein_coding	MGI Symbol	1	frizzled class receptor 9 [Source:MGI Symbol;Acc:MGI:1313278]	-0.473422	-0.504199	-1.22742	0.225072	0.999227	-5.0238
ENSMUSG00000004894	Hapln2	protein_coding	MGI Symbol	4	hyaluronan and proteoglycan link protein 2 [Source:MGI Symbol;Acc:MGI:2137300]	-0.492322	0.273102	-1.35349	0.181628	0.999227	-5.0261
ENSMUSG00000035211	Xrra1	protein_coding	MGI Symbol	5	X-ray radiation resistance associated 1 [Source:MGI Symbol;Acc:MGI:2181647]	-0.495185	0.640896	-1.40288	0.166465	0.999227	-5.02717
ENSMUSG00000030316	Tamm41	protein_coding	MGI Symbol	8	TAM41 mitochondrial translocator assembly and maintenance homolog [Source:MGI Symbol;Acc:MGI:1916221]	-0.17747	4.21536	-1.82708	0.0733034	0.999227	-5.0273
ENSMUSG00000050891	Tatdn1	protein_coding	MGI Symbol	10	TatD DNase domain containing 1 [Source:MGI Symbol;Acc:MGI:1916944]	0.217973	5.42977	1.90228	0.0625587	0.999227	-5.02813
ENSMUSG00000005732	Ranbp1	protein_coding	MGI Symbol	4	RAN binding protein 1 [Source:MGI Symbol;Acc:MGI:96269]	-0.236635	6.11457	-1.94884	0.0566003	0.999227	-5.02889
ENSMUSG00000109130	Gm45187	antisense	MGI Symbol	2	predicted gene 45187 [Source:MGI Symbol;Acc:MGI:5753763]	-0.303864	1.15185	-1.46624	0.148474	0.999227	-5.0297
ENSMUSG00000053117	E330013P04Rik	lincRNA	MGI Symbol	4	RIKEN cDNA E330013P04 gene [Source:MGI Symbol;Acc:MGI:2147732]	0.323758	1.53711	1.46207	0.14961	0.999227	-5.02977
ENSMUSG00000051067	Lingo3	protein_coding	MGI Symbol	2	leucine rich repeat and Ig domain containing 3 [Source:MGI Symbol;Acc:MGI:3609246]	-0.315772	4.63263	-1.86704	0.0674145	0.999227	-5.02993
ENSMUSG00000074364	Ehd2	protein_coding	MGI Symbol	2	EH-domain containing 2 [Source:MGI Symbol;Acc:MGI:2154274]	-0.283393	2.55222	-1.65276	0.104276	0.999227	-5.03048
ENSMUSG00000108228	6430584L05Rik	lincRNA	MGI Symbol	2	RIKEN cDNA 6430584L05 gene [Source:MGI Symbol;Acc:MGI:5439415]	0.417188	-0.213554	1.14425	0.257646	0.999227	-5.03171
ENSMUSG00000046491	C1qtnf2	protein_coding	MGI Symbol	3	C1q and tumor necrosis factor related protein 2 [Source:MGI Symbol;Acc:MGI:1916433]	-0.515629	-0.597696	-1.20665	0.232911	0.999227	-5.03199
ENSMUSG00000018339	Gpx3	protein_coding	MGI Symbol	3	glutathione peroxidase 3 [Source:MGI Symbol;Acc:MGI:105102]	0.404538	2.31022	1.55359	0.126217	0.999227	-5.0332
ENSMUSG00000060216	Arrb2	protein_coding	MGI Symbol	13	arrestin, beta 2 [Source:MGI Symbol;Acc:MGI:99474]	-0.220858	5.14066	-1.90383	0.0623511	0.999227	-5.03382
ENSMUSG00000022269	Marchf11	protein_coding	MGI Symbol	4	membrane associated ring-CH-type finger 11 [Source:MGI Symbol;Acc:MGI:3608327]	-0.31088	0.368301	-1.30675	0.196922	0.999227	-5.03437
ENSMUSG00000074738	Fndc10	protein_coding	MGI Symbol	1	fibronectin type III domain containing 10 [Source:MGI Symbol;Acc:MGI:2444790]	-0.205841	4.02277	-1.80646	0.0765083	0.999227	-5.03459
ENSMUSG00000008398	Elk3	protein_coding	MGI Symbol	4	ELK3, member of ETS oncogene family [Source:MGI Symbol;Acc:MGI:101762]	0.283725	1.81532	1.49494	0.140843	0.999227	-5.03475
ENSMUSG00000039497	Dse	protein_coding	MGI Symbol	5	dermatan sulfate epimerase [Source:MGI Symbol;Acc:MGI:2443455]	-0.227971	2.26671	-1.59587	0.116447	0.999227	-5.03666
ENSMUSG00000103441	7530428D23Rik	transcribed_processed_pseudogene	MGI Symbol	3	RIKEN cDNA 7530428D23 gene [Source:MGI Symbol;Acc:MGI:2442162]	0.561569	-0.378624	1.07668	0.286487	0.999227	-5.0375
ENSMUSG00000029570	Lfng	protein_coding	MGI Symbol	3	LFNG O-fucosylpeptide 3-beta-N-acetylglucosaminyltransferase [Source:MGI Symbol;Acc:MGI:1095413]	-0.394492	1.11855	-1.42371	0.160373	0.999227	-5.03751
ENSMUSG00000000402	Egfl6	protein_coding	MGI Symbol	1	EGF-like-domain, multiple 6 [Source:MGI Symbol;Acc:MGI:1858599]	-0.300716	1.89468	-1.56664	0.123132	0.999227	-5.03783
ENSMUSG00000097183	Gm17501	lincRNA	MGI Symbol	2	predicted gene, 17501 [Source:MGI Symbol;Acc:MGI:4937135]	-0.43462	0.146907	-1.30668	0.196948	0.999227	-5.03838
ENSMUSG00000021228	Acot3	protein_coding	MGI Symbol	3	acyl-CoA thioesterase 3 [Source:MGI Symbol;Acc:MGI:2159619]	-0.276471	1.69547	-1.54315	0.128727	0.999227	-5.03861
ENSMUSG00000061533	Cep128	protein_coding	MGI Symbol	13	centrosomal protein 128 [Source:MGI Symbol;Acc:MGI:1922466]	0.275666	1.92747	1.51525	0.135634	0.999227	-5.03889
ENSMUSG00000039236	Isg20	protein_coding	MGI Symbol	6	interferon-stimulated protein [Source:MGI Symbol;Acc:MGI:1928895]	-0.397015	0.358896	-1.32501	0.190835	0.999227	-5.04002
ENSMUSG00000079434	Neu2	protein_coding	MGI Symbol	7	neuraminidase 2 [Source:MGI Symbol;Acc:MGI:1344417]	-0.403435	0.0743213	-1.30061	0.199002	0.999227	-5.04057
ENSMUSG00000045875	Adra1a	protein_coding	MGI Symbol	6	adrenergic receptor, alpha 1a [Source:MGI Symbol;Acc:MGI:104773]	0.263634	1.55815	1.43881	0.156066	0.999227	-5.04075
ENSMUSG00000022108	Itm2b	protein_coding	MGI Symbol	5	integral membrane protein 2B [Source:MGI Symbol;Acc:MGI:1309517]	-0.278467	9.80777	-1.98613	0.0521859	0.999227	-5.04095
ENSMUSG00000048120	Entpd1	protein_coding	MGI Symbol	11	ectonucleoside triphosphate diphosphohydrolase 1 [Source:MGI Symbol;Acc:MGI:102805]	-0.216226	2.40384	-1.59889	0.115772	0.999227	-5.04131
ENSMUSG00000027331	Knstrn	protein_coding	MGI Symbol	9	kinetochore-localized astrin/SPAG5 binding [Source:MGI Symbol;Acc:MGI:1289298]	0.350275	-0.300927	1.12268	0.266619	0.999227	-5.04201
ENSMUSG00000032125	Robo4	protein_coding	MGI Symbol	7	roundabout guidance receptor 4 [Source:MGI Symbol;Acc:MGI:1921394]	-0.407421	-0.0722125	-1.26829	0.21022	0.999227	-5.04256
ENSMUSG00000024206	Rfx2	protein_coding	MGI Symbol	5	regulatory factor X, 2 (influences HLA class II expression) [Source:MGI Symbol;Acc:MGI:106583]	-0.282714	1.71539	-1.53472	0.130783	0.999227	-5.04279
ENSMUSG00000039886	Tmem120a	protein_coding	MGI Symbol	5	transmembrane protein 120A [Source:MGI Symbol;Acc:MGI:2686991]	-0.205523	4.46154	-1.8437	0.0708041	0.999227	-5.04401
ENSMUSG00000118280	Gm41804	lincRNA	MGI Symbol	1	predicted gene, 41804 [Source:MGI Symbol;Acc:MGI:5624689]	0.376281	-0.384152	1.14661	0.256677	0.999227	-5.04418
ENSMUSG00000068798	Rap1a	protein_coding	MGI Symbol	4	RAS-related protein 1a [Source:MGI Symbol;Acc:MGI:97852]	-0.147457	6.33992	-1.94407	0.057188	0.999227	-5.04489
ENSMUSG00000104969	Gm43445	sense_intronic	MGI Symbol	1	predicted gene 43445 [Source:MGI Symbol;Acc:MGI:5663582]	0.406305	-0.21514	1.11083	0.271639	0.999227	-5.04499
ENSMUSG00000037820	Tgm2	protein_coding	MGI Symbol	4	transglutaminase 2, C polypeptide [Source:MGI Symbol;Acc:MGI:98731]	-0.353918	1.27544	-1.47344	0.146529	0.999227	-5.04519
ENSMUSG00000038451	Spsb2	protein_coding	MGI Symbol	5	splA/ryanodine receptor domain and SOCS box containing 2 [Source:MGI Symbol;Acc:MGI:1315199]	-0.274816	1.70345	-1.53054	0.131812	0.999227	-5.04603
ENSMUSG00000100394	Gm28791	sense_intronic	MGI Symbol	1	predicted gene 28791 [Source:MGI Symbol;Acc:MGI:5579497]	0.66575	-0.685195	0.999068	0.322288	0.999227	-5.04651
ENSMUSG00000037086	Prr32	protein_coding	MGI Symbol	1	proline rich 32 [Source:MGI Symbol;Acc:MGI:1916050]	-1.14213	-0.755771	-1.24791	0.217532	0.999227	-5.04671
ENSMUSG00000042182	Bend6	protein_coding	MGI Symbol	6	BEN domain containing 6 [Source:MGI Symbol;Acc:MGI:2444572]	-0.162416	5.70388	-1.91862	0.0604098	0.999227	-5.04726
ENSMUSG00000107182	Gm43268	TEC	MGI Symbol	1	predicted gene 43268 [Source:MGI Symbol;Acc:MGI:5663405]	0.314854	1.20046	1.36242	0.178811	0.999227	-5.04933
ENSMUSG00000083539	Gm12466	processed_pseudogene	MGI Symbol	1	predicted gene 12466 [Source:MGI Symbol;Acc:MGI:3651763]	-0.285483	0.170109	-1.27375	0.208292	0.999227	-5.05084
ENSMUSG00000023066	Rttn	protein_coding	MGI Symbol	10	rotatin [Source:MGI Symbol;Acc:MGI:2179288]	-0.292824	0.827003	-1.36685	0.177427	0.999227	-5.05176
ENSMUSG00000073650	Catip	protein_coding	MGI Symbol	4	ciliogenesis associated TTC17 interacting protein [Source:MGI Symbol;Acc:MGI:2685062]	-0.339987	0.369654	-1.31098	0.1955	0.999227	-5.05192
ENSMUSG00000109473	B930025P03Rik	lincRNA	MGI Symbol	2	RIKEN cDNA B930025P03 gene [Source:MGI Symbol;Acc:MGI:2443166]	-0.433752	0.274634	-1.23062	0.223882	0.999227	-5.05213
ENSMUSG00000111611	Olfr157	protein_coding	MGI Symbol	2	olfactory receptor 157 [Source:MGI Symbol;Acc:MGI:1352684]	0.270717	1.88277	1.4962	0.140515	0.999227	-5.05298
ENSMUSG00000042489	Clspn	protein_coding	MGI Symbol	7	claspin [Source:MGI Symbol;Acc:MGI:2445153]	0.321009	1.37507	1.40708	0.165224	0.999227	-5.05299
ENSMUSG00000114771	Gm49064	lincRNA	MGI Symbol	1	predicted gene, 49064 [Source:MGI Symbol;Acc:MGI:6118443]	0.305178	0.746436	1.29447	0.201099	0.999227	-5.05347
ENSMUSG00000068686	Cd59b	protein_coding	MGI Symbol	5	CD59b antigen [Source:MGI Symbol;Acc:MGI:1888996]	0.367051	-0.331669	1.08461	0.282989	0.999227	-5.05418
ENSMUSG00000078161	Erich3	protein_coding	MGI Symbol	4	glutamate rich 3 [Source:MGI Symbol;Acc:MGI:1919095]	0.21324	2.83488	1.62262	0.110586	0.999227	-5.05436
ENSMUSG00000032491	Nradd	protein_coding	MGI Symbol	4	neurotrophin receptor associated death domain [Source:MGI Symbol;Acc:MGI:1914419]	-0.403757	0.452192	-1.32855	0.189671	0.999227	-5.05451
ENSMUSG00000089875	Etohd2	antisense	MGI Symbol	3	ethanol decreased 2 [Source:MGI Symbol;Acc:MGI:1261417]	-0.294022	0.7805	-1.34934	0.182948	0.999227	-5.05506
ENSMUSG00000025588	Nat1	protein_coding	MGI Symbol	2	N-acetyl transferase 1 [Source:MGI Symbol;Acc:MGI:97279]	0.338923	1.17526	1.37313	0.175477	0.999227	-5.05539
ENSMUSG00000031144	Syp	protein_coding	MGI Symbol	6	synaptophysin [Source:MGI Symbol;Acc:MGI:98467]	-0.191579	8.10983	-1.9647	0.0546858	0.999227	-5.05548
ENSMUSG00000032679	Cd59a	protein_coding	MGI Symbol	3	CD59a antigen [Source:MGI Symbol;Acc:MGI:109177]	0.420585	2.71267	1.59199	0.117317	0.999227	-5.05566
ENSMUSG00000112880	Gm20337	bidirectional_promoter_lncRNA	MGI Symbol	1	predicted gene, 20337 [Source:MGI Symbol;Acc:MGI:5012522]	0.535621	-0.48748	1.0625	0.292813	0.999227	-5.05627
ENSMUSG00000096458	Moap1	protein_coding	MGI Symbol	2	modulator of apoptosis 1 [Source:MGI Symbol;Acc:MGI:1915555]	0.389041	-0.429285	1.07492	0.287264	0.999227	-5.05729
ENSMUSG00000009376	Met	protein_coding	MGI Symbol	7	met proto-oncogene [Source:MGI Symbol;Acc:MGI:96969]	-0.49226	-0.54022	-1.17555	0.245012	0.999227	-5.05867
ENSMUSG00000084968	Gm12743	processed_transcript	MGI Symbol	1	predicted gene 12743 [Source:MGI Symbol;Acc:MGI:3651449]	-0.298746	0.372121	-1.2907	0.202392	0.999227	-5.05897
ENSMUSG00000059555	Tor4a	protein_coding	MGI Symbol	3	torsin family 4, member A [Source:MGI Symbol;Acc:MGI:2442720]	0.429209	0.339799	1.20693	0.232803	0.999227	-5.0591
ENSMUSG00000083649	Rasl2-9	protein_coding	MGI Symbol	1	RAS-like, family 2, locus 9 [Source:MGI Symbol;Acc:MGI:104605]	0.351401	-0.151187	1.13584	0.261117	0.999227	-5.0605
ENSMUSG00000031955	Bcar1	protein_coding	MGI Symbol	3	breast cancer anti-estrogen resistance 1 [Source:MGI Symbol;Acc:MGI:108091]	-0.218532	5.81721	-1.92075	0.0601334	0.999227	-5.06069
ENSMUSG00000028850	Gpatch3	protein_coding	MGI Symbol	2	G patch domain containing 3 [Source:MGI Symbol;Acc:MGI:2442492]	-0.344583	0.952825	-1.40341	0.166311	0.999227	-5.06076
ENSMUSG00000031927	1700012B09Rik	protein_coding	MGI Symbol	5	RIKEN cDNA 1700012B09 gene [Source:MGI Symbol;Acc:MGI:1916575]	-0.505039	-0.776857	-1.10936	0.272269	0.999227	-5.06113
ENSMUSG00000031828	Klhl36	protein_coding	MGI Symbol	3	kelch-like 36 [Source:MGI Symbol;Acc:MGI:2385305]	-0.475681	1.93058	-1.57138	0.122028	0.999227	-5.06121
ENSMUSG00000112663	C630031E19Rik	antisense	MGI Symbol	1	RIKEN cDNA C630031E19 gene [Source:MGI Symbol;Acc:MGI:5439405]	-0.280095	1.6941	-1.52313	0.133654	0.999227	-5.06149
ENSMUSG00000054115	Skp2	protein_coding	MGI Symbol	5	S-phase kinase-associated protein 2 (p45) [Source:MGI Symbol;Acc:MGI:1351663]	0.257403	2.31211	1.53107	0.131682	0.999227	-5.06192
ENSMUSG00000097881	Celrr	lincRNA	MGI Symbol	4	cerebellum expressed regulatory RNA [Source:MGI Symbol;Acc:MGI:2685664]	0.330064	1.45253	1.39857	0.167749	0.999227	-5.06209
ENSMUSG00000031079	Zfp300	protein_coding	MGI Symbol	3	zinc finger protein 300 [Source:MGI Symbol;Acc:MGI:3045326]	0.240206	1.50275	1.4214	0.161042	0.999227	-5.06249
ENSMUSG00000060224	Pyroxd2	protein_coding	MGI Symbol	5	pyridine nucleotide-disulphide oxidoreductase domain 2 [Source:MGI Symbol;Acc:MGI:1921830]	-0.400767	-0.326107	-1.19738	0.236472	0.999227	-5.06326
ENSMUSG00000100876	2810454H06Rik	antisense	MGI Symbol	1	RIKEN cDNA 2810454H06 gene [Source:MGI Symbol;Acc:MGI:1920063]	-0.286385	0.924648	-1.39914	0.16758	0.999227	-5.06361
ENSMUSG00000028689	Ccdc163	protein_coding	MGI Symbol	14	coiled-coil domain containing 163 [Source:MGI Symbol;Acc:MGI:1915644]	0.352131	1.06147	1.32594	0.190531	0.999227	-5.06507
ENSMUSG00000043289	Mei4	protein_coding	MGI Symbol	3	meiotic double-stranded break formation protein 4 [Source:MGI Symbol;Acc:MGI:1922283]	0.34733	0.67656	1.26242	0.212309	0.999227	-5.06546
ENSMUSG00000076435	Acsf2	protein_coding	MGI Symbol	4	acyl-CoA synthetase family member 2 [Source:MGI Symbol;Acc:MGI:2388287]	0.289536	0.72875	1.28733	0.203558	0.999227	-5.0658
ENSMUSG00000032344	Cgas	protein_coding	MGI Symbol	3	cyclic GMP-AMP synthase [Source:MGI Symbol;Acc:MGI:2442261]	-0.33918	0.904255	-1.38078	0.173124	0.999227	-5.06617
ENSMUSG00000082729	Gm14845	processed_pseudogene	MGI Symbol	1	predicted gene 14845 [Source:MGI Symbol;Acc:MGI:3704515]	0.32534	-0.162556	1.13765	0.260366	0.999227	-5.06627
ENSMUSG00000026344	Lypd1	protein_coding	MGI Symbol	5	Ly6/Plaur domain containing 1 [Source:MGI Symbol;Acc:MGI:1919835]	0.205337	4.70356	1.82496	0.0736274	0.999227	-5.06671
ENSMUSG00000112381	Gm8170	processed_pseudogene	MGI Symbol	1	predicted gene 8170 [Source:MGI Symbol;Acc:MGI:3644928]	0.427205	-0.532329	1.04466	0.300908	0.999227	-5.06719
ENSMUSG00000030286	Emc3	protein_coding	MGI Symbol	3	ER membrane protein complex subunit 3 [Source:MGI Symbol;Acc:MGI:1913337]	-0.171438	5.9664	-1.91941	0.0603071	0.999227	-5.06783
ENSMUSG00000035944	Ttc38	protein_coding	MGI Symbol	3	tetratricopeptide repeat domain 38 [Source:MGI Symbol;Acc:MGI:2146198]	0.220131	3.57732	1.70953	0.093186	0.999227	-5.06927
ENSMUSG00000047671	Tctex1d4	protein_coding	MGI Symbol	3	Tctex1 domain containing 4 [Source:MGI Symbol;Acc:MGI:3045358]	-0.53847	-0.145224	-1.23589	0.221932	0.999227	-5.06949
ENSMUSG00000028179	Cth	protein_coding	MGI Symbol	4	cystathionase (cystathionine gamma-lyase) [Source:MGI Symbol;Acc:MGI:1339968]	0.416813	1.81616	1.45055	0.152782	0.999227	-5.06952
ENSMUSG00000039826	Trub2	protein_coding	MGI Symbol	10	TruB pseudouridine (psi) synthase family member 2 [Source:MGI Symbol;Acc:MGI:2442186]	0.1516	4.80195	1.83072	0.0727505	0.999227	-5.06963
ENSMUSG00000030924	Rexo5	protein_coding	MGI Symbol	11	RNA exonuclease 5 [Source:MGI Symbol;Acc:MGI:1919402]	-0.413075	-0.216866	-1.18093	0.242888	0.999227	-5.06977
ENSMUSG00000078868	Gm14412	protein_coding	MGI Symbol	1	predicted gene 14412 [Source:MGI Symbol;Acc:MGI:3652251]	0.424769	-0.524313	1.0521	0.297512	0.999227	-5.07042
ENSMUSG00000109217	Gm44676	TEC	MGI Symbol	1	predicted gene 44676 [Source:MGI Symbol;Acc:MGI:5753252]	0.612402	0.627912	1.20962	0.231778	0.999227	-5.07081
ENSMUSG00000075569	Rsph10b	protein_coding	MGI Symbol	5	radial spoke head 10 homolog B (Chlamydomonas) [Source:MGI Symbol;Acc:MGI:1922386]	0.441332	0.50593	1.21333	0.230366	0.999227	-5.07118
ENSMUSG00000048920	Fkrp	protein_coding	MGI Symbol	4	fukutin related protein [Source:MGI Symbol;Acc:MGI:2447586]	-0.292417	4.15156	-1.80432	0.0768479	0.999227	-5.07136
ENSMUSG00000053574	4930563E22Rik	protein_coding	MGI Symbol	2	RIKEN cDNA 4930563E22 gene [Source:MGI Symbol;Acc:MGI:1922554]	-0.244326	2.22804	-1.57443	0.121321	0.999227	-5.07137
ENSMUSG00000087249	Gm16062	antisense	MGI Symbol	1	predicted gene 16062 [Source:MGI Symbol;Acc:MGI:3802162]	-0.297823	0.335513	-1.29355	0.201415	0.999227	-5.07154
ENSMUSG00000045319	Proser2	protein_coding	MGI Symbol	4	proline and serine rich 2 [Source:MGI Symbol;Acc:MGI:2442238]	-0.407107	-0.372924	-1.17577	0.244926	0.999227	-5.07159
ENSMUSG00000084806	Gm15232	lincRNA	MGI Symbol	1	predicted gene 15232 [Source:MGI Symbol;Acc:MGI:3705117]	-0.301034	0.0978447	-1.24143	0.219896	0.999227	-5.07176
ENSMUSG00000116641	Gm41505	antisense	MGI Symbol	1	predicted gene, 41505 [Source:MGI Symbol;Acc:MGI:5624390]	0.381699	0.513738	1.20282	0.234377	0.999227	-5.07203
ENSMUSG00000024330	Col11a2	protein_coding	MGI Symbol	12	collagen, type XI, alpha 2 [Source:MGI Symbol;Acc:MGI:88447]	-0.421806	0.57618	-1.32409	0.191138	0.999227	-5.07252
ENSMUSG00000045314	Sowahb	protein_coding	MGI Symbol	1	sosondowah ankyrin repeat domain family member B [Source:MGI Symbol;Acc:MGI:1925338]	0.420153	0.782506	1.278	0.206802	0.999227	-5.07256
ENSMUSG00000037818	Abhd18	protein_coding	MGI Symbol	11	abhydrolase domain containing 18 [Source:MGI Symbol;Acc:MGI:1915468]	0.251241	3.30128	1.66015	0.102772	0.999227	-5.07354
ENSMUSG00000052056	Zfp217	protein_coding	MGI Symbol	5	zinc finger protein 217 [Source:MGI Symbol;Acc:MGI:2685408]	0.317505	0.37498	1.248	0.217501	0.999227	-5.07362
ENSMUSG00000063268	Parp10	protein_coding	MGI Symbol	6	poly (ADP-ribose) polymerase family, member 10 [Source:MGI Symbol;Acc:MGI:3712326]	-0.390317	0.763044	-1.32921	0.189457	0.999227	-5.07375
ENSMUSG00000038745	Nlrp6	protein_coding	MGI Symbol	4	NLR family, pyrin domain containing 6 [Source:MGI Symbol;Acc:MGI:2141990]	0.465534	-0.408041	1.02395	0.310498	0.999227	-5.07393
ENSMUSG00000040164	Kcns1	protein_coding	MGI Symbol	1	K+ voltage-gated channel, subfamily S, 1 [Source:MGI Symbol;Acc:MGI:1197019]	-0.38775	1.62799	-1.52406	0.133421	0.999227	-5.07422
ENSMUSG00000034755	Pcdh11x	protein_coding	MGI Symbol	9	protocadherin 11 X-linked [Source:MGI Symbol;Acc:MGI:2442849]	0.26495	2.15557	1.5293	0.132118	0.999227	-5.07496
ENSMUSG00000093885	Rpl35a-ps5	processed_pseudogene	MGI Symbol	1	ribosomal protein L35A, pseudogene 5 [Source:MGI Symbol;Acc:MGI:3704247]	0.264302	0.571631	1.26316	0.212044	0.999227	-5.07516
ENSMUSG00000002897	Il17ra	protein_coding	MGI Symbol	3	interleukin 17 receptor A [Source:MGI Symbol;Acc:MGI:107399]	-0.35257	1.31569	-1.46246	0.149503	0.999227	-5.07522
ENSMUSG00000010307	Tmem86a	protein_coding	MGI Symbol	2	transmembrane protein 86A [Source:MGI Symbol;Acc:MGI:1915143]	-0.248131	3.9399	-1.7733	0.0819075	0.999227	-5.07526
ENSMUSG00000006411	Nectin4	protein_coding	MGI Symbol	3	nectin cell adhesion molecule 4 [Source:MGI Symbol;Acc:MGI:1918990]	-0.205001	3.51846	-1.72752	0.0898815	0.999227	-5.07545
ENSMUSG00000026779	Mastl	protein_coding	MGI Symbol	2	microtubule associated serine/threonine kinase-like [Source:MGI Symbol;Acc:MGI:1914371]	-0.412854	-0.0737465	-1.21743	0.228817	0.999227	-5.07562
ENSMUSG00000063179	Pstk	protein_coding	MGI Symbol	11	phosphoseryl-tRNA kinase [Source:MGI Symbol;Acc:MGI:2685945]	-0.187904	4.84343	-1.85403	0.0692862	0.999227	-5.0759
ENSMUSG00000025854	Fam20c	protein_coding	MGI Symbol	6	family with sequence similarity 20, member C [Source:MGI Symbol;Acc:MGI:2136853]	-0.241068	2.97547	-1.65818	0.103171	0.999227	-5.07615
ENSMUSG00000023992	Trem2	protein_coding	MGI Symbol	4	triggering receptor expressed on myeloid cells 2 [Source:MGI Symbol;Acc:MGI:1913150]	-0.228763	3.57519	-1.73413	0.0886913	0.999227	-5.07647
ENSMUSG00000027855	Sycp1	protein_coding	MGI Symbol	4	synaptonemal complex protein 1 [Source:MGI Symbol;Acc:MGI:105931]	-1.3976	-3.54787	-0.663892	0.509628	0.999227	-5.07657
ENSMUSG00000055184	Fam72a	protein_coding	MGI Symbol	1	family with sequence similarity 72, member A [Source:MGI Symbol;Acc:MGI:1919669]	0.295139	0.792028	1.30484	0.197568	0.999227	-5.07708
ENSMUSG00000054893	Zfp667	protein_coding	MGI Symbol	5	zinc finger protein 667 [Source:MGI Symbol;Acc:MGI:2442757]	0.140006	5.47712	1.87454	0.0663548	0.999227	-5.07739
ENSMUSG00000046008	Pnlip	protein_coding	MGI Symbol	4	pancreatic lipase [Source:MGI Symbol;Acc:MGI:97722]	-0.42401	-0.357448	-1.16411	0.249576	0.999227	-5.07933
ENSMUSG00000028307	Aldob	protein_coding	MGI Symbol	3	aldolase B, fructose-bisphosphate [Source:MGI Symbol;Acc:MGI:87995]	0.382128	-0.0511616	1.14638	0.256773	0.999227	-5.0812
ENSMUSG00000074766	Ism1	protein_coding	MGI Symbol	2	isthmin 1, angiogenesis inhibitor [Source:MGI Symbol;Acc:MGI:2442963]	-0.195677	1.93703	-1.52667	0.132771	0.999227	-5.08121
ENSMUSG00000046079	Lrrc8d	protein_coding	MGI Symbol	10	leucine rich repeat containing 8D [Source:MGI Symbol;Acc:MGI:1922368]	-0.194317	4.48085	-1.81555	0.0750815	0.999227	-5.0815
ENSMUSG00000030104	Edem1	protein_coding	MGI Symbol	5	ER degradation enhancer, mannosidase alpha-like 1 [Source:MGI Symbol;Acc:MGI:2180139]	-0.210838	2.74892	-1.61754	0.111681	0.999227	-5.08201
ENSMUSG00000104662	Gm43267	TEC	MGI Symbol	1	predicted gene 43267 [Source:MGI Symbol;Acc:MGI:5663404]	-0.30277	2.75119	-1.64237	0.106416	0.999227	-5.08231
ENSMUSG00000107756	Gm44164	TEC	MGI Symbol	1	predicted gene, 44164 [Source:MGI Symbol;Acc:MGI:5690556]	0.57703	-0.0643663	1.13368	0.262014	0.999227	-5.08301
ENSMUSG00000044734	Serpinb1a	protein_coding	MGI Symbol	4	serine (or cysteine) peptidase inhibitor, clade B, member 1a [Source:MGI Symbol;Acc:MGI:1913472]	-0.371247	4.34146	-1.81726	0.0748157	0.999227	-5.08318
ENSMUSG00000026098	Pms1	protein_coding	MGI Symbol	8	PMS1 homolog 1, mismatch repair system component [Source:MGI Symbol;Acc:MGI:1202302]	0.272634	2.17459	1.51789	0.134968	0.999227	-5.08335
ENSMUSG00000025332	Kdm5c	protein_coding	MGI Symbol	6	lysine (K)-specific demethylase 5C [Source:MGI Symbol;Acc:MGI:99781]	0.209478	4.91443	1.82909	0.0729976	0.999227	-5.08426
ENSMUSG00000111474	Gm32926	antisense	MGI Symbol	2	predicted gene, 32926 [Source:MGI Symbol;Acc:MGI:5592085]	0.336277	-0.204816	1.10272	0.275114	0.999227	-5.08545
ENSMUSG00000037949	Ano10	protein_coding	MGI Symbol	8	anoctamin 10 [Source:MGI Symbol;Acc:MGI:2143103]	-0.233127	3.40959	-1.70485	0.0940609	0.999227	-5.08564
ENSMUSG00000032303	Chrna3	protein_coding	MGI Symbol	3	cholinergic receptor, nicotinic, alpha polypeptide 3 [Source:MGI Symbol;Acc:MGI:87887]	-0.348711	-0.173563	-1.1734	0.245866	0.999227	-5.08631
ENSMUSG00000032556	Bfsp2	protein_coding	MGI Symbol	2	beaded filament structural protein 2, phakinin [Source:MGI Symbol;Acc:MGI:1333828]	-0.282401	3.07352	-1.67823	0.0991731	0.999227	-5.08762
ENSMUSG00000022039	Adam2	protein_coding	MGI Symbol	2	a disintegrin and metallopeptidase domain 2 [Source:MGI Symbol;Acc:MGI:1340894]	0.305408	0.329065	1.20165	0.234826	0.999227	-5.08764
ENSMUSG00000071568	Gm5874	processed_pseudogene	MGI Symbol	1	predicted gene 5874 [Source:MGI Symbol;Acc:MGI:3648027]	-0.293446	-0.0682863	-1.21001	0.231628	0.999227	-5.08784
ENSMUSG00000047749	Zc3hav1l	protein_coding	MGI Symbol	1	zinc finger CCCH-type, antiviral 1-like [Source:MGI Symbol;Acc:MGI:2443387]	0.273849	2.08162	1.49125	0.141806	0.999227	-5.08863
ENSMUSG00000111345	Gm48562	TEC	MGI Symbol	1	predicted gene, 48562 [Source:MGI Symbol;Acc:MGI:6098119]	-0.397519	-0.0932924	-1.18339	0.241919	0.999227	-5.08917
ENSMUSG00000047205	Dusp18	protein_coding	MGI Symbol	2	dual specificity phosphatase 18 [Source:MGI Symbol;Acc:MGI:1922469]	0.149346	5.53518	1.87504	0.0662854	0.999227	-5.08925
ENSMUSG00000050930	Map10	protein_coding	MGI Symbol	1	microtubule-associated protein 10 [Source:MGI Symbol;Acc:MGI:1921643]	-0.263959	1.42737	-1.44377	0.154673	0.999227	-5.08926
ENSMUSG00000044772	Sntn	protein_coding	MGI Symbol	1	sentan, cilia apical structure protein [Source:MGI Symbol;Acc:MGI:3045373]	-0.45233	0.21314	-1.2396	0.220569	0.999227	-5.08938
ENSMUSG00000033192	Lpcat2	protein_coding	MGI Symbol	5	lysophosphatidylcholine acyltransferase 2 [Source:MGI Symbol;Acc:MGI:3606214]	-0.26959	2.44063	-1.59382	0.116906	0.999227	-5.08941
ENSMUSG00000050628	Ubald2	protein_coding	MGI Symbol	2	UBA-like domain containing 2 [Source:MGI Symbol;Acc:MGI:1914635]	-0.313014	3.13975	-1.69373	0.0961697	0.999227	-5.08942
ENSMUSG00000028551	Cdkn2c	protein_coding	MGI Symbol	2	cyclin dependent kinase inhibitor 2C [Source:MGI Symbol;Acc:MGI:105388]	-0.251236	1.86503	-1.53041	0.131846	0.999227	-5.08996
ENSMUSG00000079487	Med12	protein_coding	MGI Symbol	9	mediator complex subunit 12 [Source:MGI Symbol;Acc:MGI:1926212]	-0.247163	2.14233	-1.55342	0.126256	0.999227	-5.09013
ENSMUSG00000107858	Gm43879	TEC	MGI Symbol	1	predicted gene, 43879 [Source:MGI Symbol;Acc:MGI:5690271]	-0.793702	-1.46075	-0.948783	0.347025	0.999227	-5.09067
ENSMUSG00000081911	Mrps36-ps2	processed_pseudogene	MGI Symbol	1	mitochondrial ribosomal protein S36, pseudogene 2 [Source:MGI Symbol;Acc:MGI:3704298]	0.228203	0.436399	1.23166	0.223497	0.999227	-5.09154
ENSMUSG00000068428	Gmnc	protein_coding	MGI Symbol	4	geminin coiled-coil domain containing [Source:MGI Symbol;Acc:MGI:2685452]	0.369882	0.536904	1.21296	0.230508	0.999227	-5.0916
ENSMUSG00000004961	Syt5	protein_coding	MGI Symbol	3	synaptotagmin V [Source:MGI Symbol;Acc:MGI:1926368]	-0.173566	7.24891	-1.93524	0.0582887	0.999227	-5.09177
ENSMUSG00000002808	Epdr1	protein_coding	MGI Symbol	4	ependymin related protein 1 (zebrafish) [Source:MGI Symbol;Acc:MGI:2145369]	-0.169243	6.34765	-1.91802	0.0604875	0.999227	-5.09185
ENSMUSG00000083610	Oaz2-ps	processed_pseudogene	MGI Symbol	1	ornithine decarboxylase antizyme 2, pseudogene [Source:MGI Symbol;Acc:MGI:3644634]	-0.255608	1.47436	-1.46834	0.147904	0.999227	-5.09257
ENSMUSG00000039031	Arhgap18	protein_coding	MGI Symbol	5	Rho GTPase activating protein 18 [Source:MGI Symbol;Acc:MGI:1921160]	0.358688	1.32363	1.34308	0.184951	0.999227	-5.09301
ENSMUSG00000025962	Fastkd2	protein_coding	MGI Symbol	6	FAST kinase domains 2 [Source:MGI Symbol;Acc:MGI:1922869]	0.206368	4.42944	1.78259	0.0803633	0.999227	-5.09305
ENSMUSG00000041319	Thoc6	protein_coding	MGI Symbol	7	THO complex 6 [Source:MGI Symbol;Acc:MGI:2677480]	-0.182802	3.8595	-1.74906	0.0860521	0.999227	-5.09311
ENSMUSG00000041771	Slc24a4	protein_coding	MGI Symbol	4	solute carrier family 24 (sodium/potassium/calcium exchanger), member 4 [Source:MGI Symbol;Acc:MGI:2447362]	-0.302037	2.8043	-1.62623	0.109814	0.999227	-5.09325
ENSMUSG00000106981	Gm45495	lincRNA	MGI Symbol	1	predicted gene 45495 [Source:MGI Symbol;Acc:MGI:5791331]	0.284887	2.73388	1.57828	0.120434	0.999227	-5.09329
ENSMUSG00000002111	Spi1	protein_coding	MGI Symbol	4	spleen focus forming virus (SFFV) proviral integration oncogene [Source:MGI Symbol;Acc:MGI:98282]	-0.601094	-0.545924	-1.17815	0.243983	0.999227	-5.09459
ENSMUSG00000053644	Aldh7a1	protein_coding	MGI Symbol	9	aldehyde dehydrogenase family 7, member A1 [Source:MGI Symbol;Acc:MGI:108186]	0.178657	5.97774	1.89242	0.0638856	0.999227	-5.0959
ENSMUSG00000085338	2410004I01Rik	lincRNA	MGI Symbol	1	RIKEN cDNA 2410004I01 gene [Source:MGI Symbol;Acc:MGI:1916989]	0.363802	0.0541928	1.14086	0.259042	0.999227	-5.09701
ENSMUSG00000040599	Mis12	protein_coding	MGI Symbol	6	MIS12 kinetochore complex component [Source:MGI Symbol;Acc:MGI:1914389]	0.204494	4.72602	1.80534	0.0766866	0.999227	-5.09833
ENSMUSG00000094958	3110021N24Rik	protein_coding	MGI Symbol	1	RIKEN cDNA 3110021N24 gene [Source:MGI Symbol;Acc:MGI:1920383]	0.37908	-0.508845	1.01302	0.315641	0.999227	-5.10061
ENSMUSG00000038034	Igsf8	protein_coding	MGI Symbol	8	immunoglobulin superfamily, member 8 [Source:MGI Symbol;Acc:MGI:2154090]	-0.290972	5.81554	-1.90011	0.0628487	0.999227	-5.10141
ENSMUSG00000028599	Tnfrsf1b	protein_coding	MGI Symbol	2	tumor necrosis factor receptor superfamily, member 1b [Source:MGI Symbol;Acc:MGI:1314883]	-0.387344	0.490968	-1.2648	0.211462	0.999227	-5.10215
ENSMUSG00000038838	Vars2	protein_coding	MGI Symbol	12	valyl-tRNA synthetase 2, mitochondrial [Source:MGI Symbol;Acc:MGI:1916165]	-0.189604	2.74788	-1.62378	0.110338	0.999227	-5.10221
ENSMUSG00000024867	Pip5k1b	protein_coding	MGI Symbol	5	phosphatidylinositol-4-phosphate 5-kinase, type 1 beta [Source:MGI Symbol;Acc:MGI:107930]	-0.144816	5.70837	-1.88923	0.0643204	0.999227	-5.10307
ENSMUSG00000037624	Kcnk2	protein_coding	MGI Symbol	10	potassium channel, subfamily K, member 2 [Source:MGI Symbol;Acc:MGI:109366]	-0.164734	5.06159	-1.84786	0.0701891	0.999227	-5.10365
ENSMUSG00000029591	Ung	protein_coding	MGI Symbol	6	uracil DNA glycosylase [Source:MGI Symbol;Acc:MGI:109352]	-0.480232	1.14542	-1.42294	0.160595	0.999227	-5.10415
ENSMUSG00000003134	Tbc1d8	protein_coding	MGI Symbol	5	TBC1 domain family, member 8 [Source:MGI Symbol;Acc:MGI:1927225]	-0.226869	2.26719	-1.54373	0.128588	0.999227	-5.10447
ENSMUSG00000062758	Gm16477	processed_pseudogene	MGI Symbol	1	predicted pseudogene 16477 [Source:MGI Symbol;Acc:MGI:3646779]	0.254407	0.213162	1.18765	0.240252	0.999227	-5.10472
ENSMUSG00000028799	Zfp362	protein_coding	MGI Symbol	4	zinc finger protein 362 [Source:MGI Symbol;Acc:MGI:2652839]	-0.240618	3.64581	-1.72863	0.0896794	0.999227	-5.10475
ENSMUSG00000099760	Gm28800	antisense	MGI Symbol	1	predicted gene 28800 [Source:MGI Symbol;Acc:MGI:5579506]	-0.364858	-0.58559	-1.06485	0.291755	0.999227	-5.10533
ENSMUSG00000017830	Dhx58	protein_coding	MGI Symbol	6	DEXH (Asp-Glu-X-His) box polypeptide 58 [Source:MGI Symbol;Acc:MGI:1931560]	0.378183	-0.184294	1.10423	0.274466	0.999227	-5.10554
ENSMUSG00000048445	Ccdc57	protein_coding	MGI Symbol	3	coiled-coil domain containing 57 [Source:MGI Symbol;Acc:MGI:1918526]	0.250786	2.27043	1.51499	0.135698	0.999227	-5.10566
ENSMUSG00000024691	Fam111a	protein_coding	MGI Symbol	4	family with sequence similarity 111, member A [Source:MGI Symbol;Acc:MGI:1915508]	0.368143	0.094865	1.15861	0.251796	0.999227	-5.10569
ENSMUSG00000107000	Gm43481	TEC	MGI Symbol	1	predicted gene 43481 [Source:MGI Symbol;Acc:MGI:5663618]	0.457556	0.88374	1.24469	0.218707	0.999227	-5.10675
ENSMUSG00000052921	Arhgef15	protein_coding	MGI Symbol	6	Rho guanine nucleotide exchange factor (GEF) 15 [Source:MGI Symbol;Acc:MGI:3045246]	0.297713	2.97944	1.5964	0.116328	0.999227	-5.10682
ENSMUSG00000066113	Adamtsl1	protein_coding	MGI Symbol	12	ADAMTS-like 1 [Source:MGI Symbol;Acc:MGI:1924989]	-0.337104	1.52562	-1.43778	0.156358	0.999227	-5.10698
ENSMUSG00000108920	Gm44678	TEC	MGI Symbol	1	predicted gene 44678 [Source:MGI Symbol;Acc:MGI:5753254]	0.507864	-0.595655	0.993271	0.325078	0.999227	-5.10702
ENSMUSG00000015869	Prpsap1	protein_coding	MGI Symbol	9	phosphoribosyl pyrophosphate synthetase-associated protein 1 [Source:MGI Symbol;Acc:MGI:1915013]	-0.296792	4.22022	-1.78073	0.0806707	0.999227	-5.10732
ENSMUSG00000010095	Slc3a2	protein_coding	MGI Symbol	9	solute carrier family 3 (activators of dibasic and neutral amino acid transport), member 2 [Source:MGI Symbol;Acc:MGI:96955]	-0.174372	6.04097	-1.90089	0.0627444	0.999227	-5.10738
ENSMUSG00000093798	Gm8355	processed_pseudogene	MGI Symbol	1	predicted pseudogene 8355 [Source:MGI Symbol;Acc:MGI:3645191]	0.257195	4.7647	1.80097	0.0773805	0.999227	-5.10769
ENSMUSG00000031659	Adcy7	protein_coding	MGI Symbol	6	adenylate cyclase 7 [Source:MGI Symbol;Acc:MGI:102891]	0.358121	-0.184885	1.05528	0.29607	0.999227	-5.10769
ENSMUSG00000033486	Catsper2	protein_coding	MGI Symbol	4	cation channel, sperm associated 2 [Source:MGI Symbol;Acc:MGI:2387404]	0.306567	1.5046	1.37909	0.173643	0.999227	-5.10804
ENSMUSG00000066278	Vps37b	protein_coding	MGI Symbol	3	vacuolar protein sorting 37B [Source:MGI Symbol;Acc:MGI:1916724]	-0.419419	3.36105	-1.72248	0.0907966	0.999227	-5.10939
ENSMUSG00000050737	Ptges	protein_coding	MGI Symbol	4	prostaglandin E synthase [Source:MGI Symbol;Acc:MGI:1927593]	-0.369082	0.863484	-1.34667	0.183799	0.999227	-5.10987
ENSMUSG00000001517	Foxm1	protein_coding	MGI Symbol	8	forkhead box M1 [Source:MGI Symbol;Acc:MGI:1347487]	0.354023	-0.209968	1.08353	0.283462	0.999227	-5.10994
ENSMUSG00000111128	Gm49338	TEC	MGI Symbol	1	predicted gene, 49338 [Source:MGI Symbol;Acc:MGI:6121528]	0.172473	2.7458	1.58643	0.118572	0.999227	-5.11027
ENSMUSG00000060716	Plekhh1	protein_coding	MGI Symbol	4	pleckstrin homology domain containing, family H (with MyTH4 domain) member 1 [Source:MGI Symbol;Acc:MGI:2144989]	-0.309467	2.89045	-1.6334	0.108294	0.999227	-5.11066
ENSMUSG00000057551	Zfp317	protein_coding	MGI Symbol	5	zinc finger protein 317 [Source:MGI Symbol;Acc:MGI:107775]	0.307053	4.90854	1.81881	0.0745753	0.999227	-5.11127
ENSMUSG00000078183	Gm15610	processed_pseudogene	MGI Symbol	1	predicted gene 15610 [Source:MGI Symbol;Acc:MGI:3783056]	0.271785	0.0227849	1.13456	0.26165	0.999227	-5.11155
ENSMUSG00000078201	Tmem203	protein_coding	MGI Symbol	1	transmembrane protein 203 [Source:MGI Symbol;Acc:MGI:2443597]	-0.427613	1.56004	-1.46821	0.147939	0.999227	-5.11161
ENSMUSG00000001901	Kcnh6	protein_coding	MGI Symbol	4	potassium voltage-gated channel, subfamily H (eag-related), member 6 [Source:MGI Symbol;Acc:MGI:2684139]	0.441203	0.0470423	1.08789	0.281551	0.999227	-5.11165
ENSMUSG00000026674	Ddr2	protein_coding	MGI Symbol	6	discoidin domain receptor family, member 2 [Source:MGI Symbol;Acc:MGI:1345277]	-0.349049	1.05065	-1.41363	0.1633	0.999227	-5.1118
ENSMUSG00000029007	Agtrap	protein_coding	MGI Symbol	3	angiotensin II, type I receptor-associated protein [Source:MGI Symbol;Acc:MGI:1339977]	-0.273992	2.55614	-1.59895	0.115758	0.999227	-5.11344
ENSMUSG00000020359	Phykpl	protein_coding	MGI Symbol	8	5-phosphohydroxy-L-lysine phospholyase [Source:MGI Symbol;Acc:MGI:1920197]	0.200605	2.80827	1.57758	0.120595	0.999227	-5.11375
ENSMUSG00000070315	4930581F22Rik	processed_transcript	MGI Symbol	7	RIKEN cDNA 4930581F22 gene [Source:MGI Symbol;Acc:MGI:1926184]	-0.334532	0.236519	-1.23742	0.22137	0.999227	-5.11378
ENSMUSG00000049436	Upk1b	protein_coding	MGI Symbol	2	uroplakin 1B [Source:MGI Symbol;Acc:MGI:98912]	-0.340805	0.34466	-1.24556	0.218389	0.999227	-5.11402
ENSMUSG00000033585	Ndn	protein_coding	MGI Symbol	1	necdin [Source:MGI Symbol;Acc:MGI:97290]	-0.305865	8.19481	-1.93315	0.0585516	0.999227	-5.1144
ENSMUSG00000001773	Folh1	protein_coding	MGI Symbol	3	folate hydrolase 1 [Source:MGI Symbol;Acc:MGI:1858193]	-0.271654	1.22309	-1.39149	0.169872	0.999227	-5.11452
ENSMUSG00000105528	Gm43519	TEC	MGI Symbol	1	predicted gene 43519 [Source:MGI Symbol;Acc:MGI:5663656]	0.555878	0.0379647	1.07434	0.287522	0.999227	-5.11459
ENSMUSG00000071715	Ncf4	protein_coding	MGI Symbol	6	neutrophil cytosolic factor 4 [Source:MGI Symbol;Acc:MGI:109186]	0.378912	0.136026	1.12414	0.266002	0.999227	-5.1161
ENSMUSG00000101849	Gm28386	lincRNA	MGI Symbol	1	predicted gene 28386 [Source:MGI Symbol;Acc:MGI:5579092]	0.38366	-0.425828	1.05121	0.297917	0.999227	-5.11611
ENSMUSG00000069565	Dazap1	protein_coding	MGI Symbol	7	DAZ associated protein 1 [Source:MGI Symbol;Acc:MGI:1917498]	-0.239255	3.44879	-1.70549	0.0939414	0.999227	-5.11616
ENSMUSG00000030089	Slc41a3	protein_coding	MGI Symbol	2	solute carrier family 41, member 3 [Source:MGI Symbol;Acc:MGI:1918949]	-0.372757	1.1854	-1.36977	0.176519	0.999227	-5.1165
ENSMUSG00000029470	P2rx4	protein_coding	MGI Symbol	9	purinergic receptor P2X, ligand-gated ion channel 4 [Source:MGI Symbol;Acc:MGI:1338859]	-0.22382	3.39283	-1.68309	0.0982229	0.999227	-5.11687
ENSMUSG00000027955	Gask1b	protein_coding	MGI Symbol	5	golgi associated kinase 1B [Source:MGI Symbol;Acc:MGI:1915909]	-0.279833	0.722836	-1.3	0.199211	0.999227	-5.1173
ENSMUSG00000034449	Dhrs11	protein_coding	MGI Symbol	2	dehydrogenase/reductase (SDR family) member 11 [Source:MGI Symbol;Acc:MGI:2652816]	-0.282916	1.83244	-1.49962	0.13963	0.999227	-5.11733
ENSMUSG00000106662	Gm43034	TEC	MGI Symbol	1	predicted gene 43034 [Source:MGI Symbol;Acc:MGI:5663171]	0.461433	0.287448	1.13457	0.261644	0.999227	-5.1176
ENSMUSG00000040564	Apoc1	protein_coding	MGI Symbol	4	apolipoprotein C-I [Source:MGI Symbol;Acc:MGI:88053]	-0.459313	-0.0485702	-1.19396	0.237794	0.999227	-5.11762
ENSMUSG00000021504	B4galt7	protein_coding	MGI Symbol	4	xylosylprotein beta1,4-galactosyltransferase, polypeptide 7 (galactosyltransferase I) [Source:MGI Symbol;Acc:MGI:2384987]	-0.136916	4.96081	-1.83596	0.0719584	0.999227	-5.11796
ENSMUSG00000055629	B4galnt4	protein_coding	MGI Symbol	5	beta-1,4-N-acetyl-galactosaminyl transferase 4 [Source:MGI Symbol;Acc:MGI:2652891]	-0.178621	4.96944	-1.8372	0.071773	0.999227	-5.11814
ENSMUSG00000103755	Gm37805	TEC	MGI Symbol	1	predicted gene, 37805 [Source:MGI Symbol;Acc:MGI:5611033]	-0.361045	-0.200692	-1.14882	0.255773	0.999227	-5.11867
ENSMUSG00000064201	Krt2	protein_coding	MGI Symbol	1	keratin 2 [Source:MGI Symbol;Acc:MGI:96699]	0.396423	2.17104	1.45601	0.151271	0.999227	-5.11916
ENSMUSG00000104963	Gm42974	TEC	MGI Symbol	1	predicted gene 42974 [Source:MGI Symbol;Acc:MGI:5663111]	0.531191	-0.822631	0.897485	0.373507	0.999227	-5.11917
ENSMUSG00000111621	Gm7802	processed_pseudogene	MGI Symbol	1	predicted gene 7802 [Source:MGI Symbol;Acc:MGI:3646524]	0.321376	-0.274878	1.08068	0.284719	0.999227	-5.11933
ENSMUSG00000116881	Gm49674	TEC	MGI Symbol	1	predicted gene, 49674 [Source:MGI Symbol;Acc:MGI:6215119]	0.526035	-0.263592	1.03565	0.305054	0.999227	-5.11977
ENSMUSG00000115276	9930017N22Rik	TEC	MGI Symbol	1	RIKEN cDNA 9930017N22 gene [Source:MGI Symbol;Acc:MGI:2443961]	0.48041	-0.0512788	1.04097	0.3026	0.999227	-5.11994
ENSMUSG00000103677	Pcdhga4	protein_coding	MGI Symbol	2	protocadherin gamma subfamily A, 4 [Source:MGI Symbol;Acc:MGI:1935216]	-0.376887	-0.0733857	-1.19992	0.23549	0.999227	-5.12008
ENSMUSG00000003360	Ddx23	protein_coding	MGI Symbol	7	DEAD (Asp-Glu-Ala-Asp) box polypeptide 23 [Source:MGI Symbol;Acc:MGI:1921601]	0.214339	3.14099	1.61311	0.112642	0.999227	-5.12014
ENSMUSG00000071398	2410004P03Rik	protein_coding	MGI Symbol	3	RIKEN cDNA 2410004P03 gene [Source:MGI Symbol;Acc:MGI:1920917]	-0.490809	1.63566	-1.47151	0.147048	0.999227	-5.12146
ENSMUSG00000026405	C4bp	protein_coding	MGI Symbol	4	complement component 4 binding protein [Source:MGI Symbol;Acc:MGI:88229]	0.363866	0.58177	1.17661	0.244592	0.999227	-5.12273
ENSMUSG00000049130	C5ar1	protein_coding	MGI Symbol	3	complement component 5a receptor 1 [Source:MGI Symbol;Acc:MGI:88232]	-0.42134	0.192962	-1.23729	0.221418	0.999227	-5.12312
ENSMUSG00000026887	Mrrf	protein_coding	MGI Symbol	4	mitochondrial ribosome recycling factor [Source:MGI Symbol;Acc:MGI:1915121]	0.157152	4.77083	1.79963	0.0775958	0.999227	-5.12314
ENSMUSG00000076135	Gm24276	miRNA	MGI Symbol	1	predicted gene, 24276 [Source:MGI Symbol;Acc:MGI:5454053]	0.305545	0.425753	1.18859	0.239886	0.999227	-5.12383
ENSMUSG00000095366	Gm21860	lincRNA	MGI Symbol	2	predicted gene, 21860 [Source:MGI Symbol;Acc:MGI:5434024]	0.82512	-1.44051	0.895804	0.374396	0.999227	-5.12445
ENSMUSG00000078157	Fem1al	protein_coding	MGI Symbol	1	fem-1 homolog A like [Source:MGI Symbol;Acc:MGI:2441689]	-0.314588	-0.0254154	-1.1724	0.246262	0.999227	-5.12527
ENSMUSG00000020282	Rhbdf1	protein_coding	MGI Symbol	9	rhomboid 5 homolog 1 [Source:MGI Symbol;Acc:MGI:104328]	-0.284325	1.30278	-1.39274	0.169497	0.999227	-5.12543
ENSMUSG00000054944	5330416C01Rik	lincRNA	MGI Symbol	3	RIKEN cDNA 5330416C01 gene [Source:MGI Symbol;Acc:MGI:2685378]	-0.458781	-0.340156	-1.07818	0.285821	0.999227	-5.12557
ENSMUSG00000025020	Slit1	protein_coding	MGI Symbol	5	slit guidance ligand 1 [Source:MGI Symbol;Acc:MGI:1315203]	-0.33905	4.36326	-1.79572	0.0782241	0.999227	-5.12563
ENSMUSG00000095524	Gm15682	processed_pseudogene	MGI Symbol	1	predicted gene 15682 [Source:MGI Symbol;Acc:MGI:3783124]	-0.324954	-0.382701	-1.12065	0.267473	0.999227	-5.12612
ENSMUSG00000029790	Cep41	protein_coding	MGI Symbol	10	centrosomal protein 41 [Source:MGI Symbol;Acc:MGI:1891414]	0.244848	2.22426	1.49257	0.141461	0.999227	-5.12667
ENSMUSG00000050335	Lgals3	protein_coding	MGI Symbol	6	lectin, galactose binding, soluble 3 [Source:MGI Symbol;Acc:MGI:96778]	-0.463946	0.848307	-1.33067	0.188979	0.999227	-5.12671
ENSMUSG00000027520	Zdbf2	protein_coding	MGI Symbol	4	zinc finger, DBF-type containing 2 [Source:MGI Symbol;Acc:MGI:1921134]	0.232375	3.11639	1.59721	0.116146	0.999227	-5.12676
ENSMUSG00000026712	Mrc1	protein_coding	MGI Symbol	2	mannose receptor, C type 1 [Source:MGI Symbol;Acc:MGI:97142]	-0.452317	-0.339879	-1.11224	0.271041	0.999227	-5.12708
ENSMUSG00000003581	Rnf215	protein_coding	MGI Symbol	4	ring finger protein 215 [Source:MGI Symbol;Acc:MGI:1918923]	-0.376688	2.53575	-1.59106	0.117525	0.999227	-5.12712
ENSMUSG00000091732	Gm17541	processed_pseudogene	MGI Symbol	1	predicted gene, 17541 [Source:MGI Symbol;Acc:MGI:4937175]	-0.28647	0.565493	-1.28006	0.206083	0.999227	-5.12722
ENSMUSG00000022656	Nectin3	protein_coding	MGI Symbol	10	nectin cell adhesion molecule 3 [Source:MGI Symbol;Acc:MGI:1930171]	-0.216974	4.14267	-1.75156	0.0856176	0.999227	-5.12752
ENSMUSG00000104950	4833413G10Rik	antisense	MGI Symbol	1	RIKEN cDNA 4833413G10 gene [Source:MGI Symbol;Acc:MGI:1921834]	0.364643	-0.224398	1.03794	0.303998	0.999227	-5.12935
ENSMUSG00000045877	4933415A04Rik	lincRNA	MGI Symbol	1	RIKEN cDNA 4933415A04 gene [Source:MGI Symbol;Acc:MGI:1922977]	-0.281041	2.65581	-1.59416	0.11683	0.999227	-5.12935
ENSMUSG00000020904	Cfap52	protein_coding	MGI Symbol	4	cilia and flagella associated protein 52 [Source:MGI Symbol;Acc:MGI:1919110]	0.482	0.18672	1.10927	0.272305	0.999227	-5.12939
ENSMUSG00000044279	Crb3	protein_coding	MGI Symbol	5	crumbs family member 3 [Source:MGI Symbol;Acc:MGI:2670904]	-0.468363	-0.281961	-1.14614	0.25687	0.999227	-5.12948
ENSMUSG00000112474	Gm46209	processed_pseudogene	MGI Symbol	1	predicted gene, 46209 [Source:MGI Symbol;Acc:MGI:5825846]	-0.295605	0.371628	-1.24263	0.219457	0.999227	-5.13044
ENSMUSG00000044477	Zfand3	protein_coding	MGI Symbol	10	zinc finger, AN1-type domain 3 [Source:MGI Symbol;Acc:MGI:1096572]	-0.141295	6.12906	-1.89047	0.0641522	0.999227	-5.13113
ENSMUSG00000047963	Stbd1	protein_coding	MGI Symbol	3	starch binding domain 1 [Source:MGI Symbol;Acc:MGI:1261768]	-0.388177	-0.232401	-1.15626	0.252745	0.999227	-5.13169
ENSMUSG00000111205	Gm39307	bidirectional_promoter_lncRNA	MGI Symbol	1	predicted gene, 39307 [Source:MGI Symbol;Acc:MGI:5622192]	-1.0403	-1.91642	-0.66371	0.509744	0.999227	-5.13188
ENSMUSG00000082070	Gm1866	processed_pseudogene	MGI Symbol	1	predicted gene 1866 [Source:MGI Symbol;Acc:MGI:3037724]	0.258003	0.597045	1.22004	0.227836	0.999227	-5.13235
ENSMUSG00000007036	Abhd16a	protein_coding	MGI Symbol	7	abhydrolase domain containing 16A [Source:MGI Symbol;Acc:MGI:99476]	-0.229047	5.85449	-1.87978	0.0656237	0.999227	-5.13391
ENSMUSG00000026192	Atic	protein_coding	MGI Symbol	6	5-aminoimidazole-4-carboxamide ribonucleotide formyltransferase/IMP cyclohydrolase [Source:MGI Symbol;Acc:MGI:1351352]	0.166557	4.69619	1.78886	0.0793363	0.999227	-5.13433
ENSMUSG00000055560	Zfp459	protein_coding	MGI Symbol	4	zinc finger protein 459 [Source:MGI Symbol;Acc:MGI:3040701]	-0.337335	0.18863	-1.22185	0.227155	0.999227	-5.13539
ENSMUSG00000021108	Prkch	protein_coding	MGI Symbol	4	protein kinase C, eta [Source:MGI Symbol;Acc:MGI:97600]	0.382676	-0.00287224	1.11544	0.269678	0.999227	-5.1354
ENSMUSG00000110618	Gm39822	lincRNA	MGI Symbol	1	predicted gene, 39822 [Source:MGI Symbol;Acc:MGI:5622707]	-0.2952	1.97395	-1.50251	0.138884	0.999227	-5.13577
ENSMUSG00000036334	Igsf10	protein_coding	MGI Symbol	4	immunoglobulin superfamily, member 10 [Source:MGI Symbol;Acc:MGI:1923481]	0.425459	-0.567817	0.965113	0.338859	0.999227	-5.13625
ENSMUSG00000031283	Chrdl1	protein_coding	MGI Symbol	5	chordin-like 1 [Source:MGI Symbol;Acc:MGI:1933172]	-0.31079	0.937307	-1.32553	0.190665	0.999227	-5.13744
ENSMUSG00000051354	Samd3	protein_coding	MGI Symbol	6	sterile alpha motif domain containing 3 [Source:MGI Symbol;Acc:MGI:2685469]	-0.751728	-1.3646	-0.923696	0.359819	0.999227	-5.13768
ENSMUSG00000117359	Gm7466	processed_pseudogene	MGI Symbol	1	predicted gene 7466 [Source:MGI Symbol;Acc:MGI:3648356]	0.291995	0.913049	1.25756	0.214049	0.999227	-5.13783
ENSMUSG00000035775	Krt20	protein_coding	MGI Symbol	1	keratin 20 [Source:MGI Symbol;Acc:MGI:1914059]	-0.353065	-0.403982	-1.10247	0.275222	0.999227	-5.13861
ENSMUSG00000031838	Ifi30	processed_transcript	MGI Symbol	2	interferon gamma inducible protein 30 [Source:MGI Symbol;Acc:MGI:2137648]	0.395408	-0.250316	1.02828	0.308476	0.999227	-5.13894
ENSMUSG00000026303	Mlph	protein_coding	MGI Symbol	3	melanophilin [Source:MGI Symbol;Acc:MGI:2176380]	-0.333862	-0.0536174	-1.13821	0.260138	0.999227	-5.1391
ENSMUSG00000034190	Chmp7	protein_coding	MGI Symbol	4	charged multivesicular body protein 7 [Source:MGI Symbol;Acc:MGI:1913922]	-0.122587	6.30665	-1.88975	0.0642494	0.999227	-5.13955
ENSMUSG00000095403	Gm21092	unprocessed_pseudogene	MGI Symbol	1	predicted gene, 21092 [Source:MGI Symbol;Acc:MGI:5434447]	-0.320272	-0.28432	-1.08634	0.282231	0.999227	-5.14046
ENSMUSG00000023973	Cnpy3	protein_coding	MGI Symbol	5	canopy FGF signaling regulator 3 [Source:MGI Symbol;Acc:MGI:1919279]	-0.16891	5.89247	-1.8776	0.0659268	0.999227	-5.14062
ENSMUSG00000037278	Tmem97	protein_coding	MGI Symbol	1	transmembrane protein 97 [Source:MGI Symbol;Acc:MGI:1916321]	-0.228723	3.63361	-1.69408	0.0961028	0.999227	-5.1411
ENSMUSG00000043895	S1pr2	protein_coding	MGI Symbol	4	sphingosine-1-phosphate receptor 2 [Source:MGI Symbol;Acc:MGI:99569]	-0.356717	0.234105	-1.23554	0.222063	0.999227	-5.14132
ENSMUSG00000103979	Gm20305	processed_pseudogene	MGI Symbol	1	predicted gene, 20305 [Source:MGI Symbol;Acc:MGI:5012490]	-0.28282	-0.0680628	-1.17877	0.243738	0.999227	-5.14206
ENSMUSG00000072980	Oip5	protein_coding	MGI Symbol	2	Opa interacting protein 5 [Source:MGI Symbol;Acc:MGI:1917895]	-0.285895	0.457114	-1.21781	0.228674	0.999227	-5.14257
ENSMUSG00000110686	Gm45855	processed_pseudogene	MGI Symbol	1	predicted gene 45855 [Source:MGI Symbol;Acc:MGI:5804970]	-0.330085	0.233938	-1.22515	0.225921	0.999227	-5.14263
ENSMUSG00000004609	Cd33	protein_coding	MGI Symbol	6	CD33 antigen [Source:MGI Symbol;Acc:MGI:99440]	0.268526	1.77051	1.37976	0.173436	0.999227	-5.14325
ENSMUSG00000083816	Gm13033	processed_pseudogene	MGI Symbol	1	predicted gene 13033 [Source:MGI Symbol;Acc:MGI:3649305]	0.326531	0.99102	1.27019	0.209548	0.999227	-5.14363
ENSMUSG00000081459	Llph-ps1	processed_pseudogene	MGI Symbol	1	LLP homolog, pseudogene 1 [Source:MGI Symbol;Acc:MGI:3649506]	-0.289943	-0.108567	-1.16778	0.248106	0.999227	-5.14399
ENSMUSG00000063383	Zfp947	protein_coding	MGI Symbol	1	zinc finger protein 947 [Source:MGI Symbol;Acc:MGI:3646759]	-0.298644	0.73309	-1.30442	0.197711	0.999227	-5.14426
ENSMUSG00000025656	Arhgef9	protein_coding	MGI Symbol	20	CDC42 guanine nucleotide exchange factor (GEF) 9 [Source:MGI Symbol;Acc:MGI:2442233]	0.103798	7.90987	1.9114	0.0613507	0.999227	-5.14475
ENSMUSG00000084990	Gm14549	antisense	MGI Symbol	1	predicted gene 14549 [Source:MGI Symbol;Acc:MGI:3705175]	-0.29728	0.0651051	-1.17905	0.243631	0.999227	-5.14484
ENSMUSG00000034730	Adgrb1	protein_coding	MGI Symbol	12	adhesion G protein-coupled receptor B1 [Source:MGI Symbol;Acc:MGI:1933736]	-0.390906	3.27671	-1.66788	0.10122	0.999227	-5.14559
ENSMUSG00000069170	Adgrv1	protein_coding	MGI Symbol	14	adhesion G protein-coupled receptor V1 [Source:MGI Symbol;Acc:MGI:1274784]	-0.287744	0.54561	-1.2517	0.216161	0.999227	-5.14567
ENSMUSG00000005465	Il27ra	protein_coding	MGI Symbol	3	interleukin 27 receptor, alpha [Source:MGI Symbol;Acc:MGI:1355318]	-0.340563	0.763237	-1.31492	0.194183	0.999227	-5.14589
ENSMUSG00000037280	Galnt6	protein_coding	MGI Symbol	3	polypeptide N-acetylgalactosaminyltransferase 6 [Source:MGI Symbol;Acc:MGI:1891640]	-0.321857	2.94173	-1.62617	0.109828	0.999227	-5.146
ENSMUSG00000004031	Brinp2	protein_coding	MGI Symbol	4	bone morphogenic protein/retinoic acid inducible neural-specific 2 [Source:MGI Symbol;Acc:MGI:2443333]	-0.226408	5.31449	-1.84474	0.0706506	0.999227	-5.14704
ENSMUSG00000030249	Abcc9	protein_coding	MGI Symbol	6	ATP-binding cassette, sub-family C (CFTR/MRP), member 9 [Source:MGI Symbol;Acc:MGI:1352630]	-0.346036	0.0484719	-1.1583	0.25192	0.999227	-5.1472
ENSMUSG00000114759	Gm10257	processed_pseudogene	MGI Symbol	1	predicted gene 10257 [Source:MGI Symbol;Acc:MGI:3644245]	-0.293833	0.478923	-1.25196	0.216066	0.999227	-5.14765
ENSMUSG00000024901	Peli3	protein_coding	MGI Symbol	7	pellino 3 [Source:MGI Symbol;Acc:MGI:1924963]	0.158866	4.71442	1.77621	0.081422	0.999227	-5.14893
ENSMUSG00000067825	Pex26	protein_coding	MGI Symbol	6	peroxisomal biogenesis factor 26 [Source:MGI Symbol;Acc:MGI:1921293]	0.220712	3.09224	1.5892	0.117947	0.999227	-5.14893
ENSMUSG00000032503	Arpp21	protein_coding	MGI Symbol	31	cyclic AMP-regulated phosphoprotein, 21 [Source:MGI Symbol;Acc:MGI:107562]	0.163017	7.55338	1.90246	0.0625339	0.999227	-5.14939
ENSMUSG00000001930	Vwf	protein_coding	MGI Symbol	11	Von Willebrand factor [Source:MGI Symbol;Acc:MGI:98941]	-0.607728	0.546842	-1.28714	0.203622	0.999227	-5.14946
ENSMUSG00000021391	Cenpp	protein_coding	MGI Symbol	2	centromere protein P [Source:MGI Symbol;Acc:MGI:1913586]	-0.25144	1.74779	-1.45359	0.151938	0.999227	-5.15021
ENSMUSG00000030515	Tarsl2	protein_coding	MGI Symbol	4	threonyl-tRNA synthetase-like 2 [Source:MGI Symbol;Acc:MGI:2444486]	-0.183584	4.03339	-1.7356	0.0884292	0.999227	-5.1507
ENSMUSG00000016194	Hsd11b1	protein_coding	MGI Symbol	7	hydroxysteroid 11-beta dehydrogenase 1 [Source:MGI Symbol;Acc:MGI:103562]	-0.254592	5.07837	-1.82975	0.0728969	0.999227	-5.15073
ENSMUSG00000016239	Lonrf3	protein_coding	MGI Symbol	3	LON peptidase N-terminal domain and ring finger 3 [Source:MGI Symbol;Acc:MGI:1921615]	-0.360618	0.476153	-1.25471	0.215072	0.999227	-5.15084
ENSMUSG00000074361	C5ar2	protein_coding	MGI Symbol	4	complement component 5a receptor 2 [Source:MGI Symbol;Acc:MGI:2442013]	0.335741	-0.289779	1.04193	0.302158	0.999227	-5.15193
ENSMUSG00000051550	Zfp579	protein_coding	MGI Symbol	6	zinc finger protein 579 [Source:MGI Symbol;Acc:MGI:1915740]	-0.292291	2.13235	-1.52492	0.133206	0.999227	-5.15248
ENSMUSG00000048355	Arxes1	protein_coding	MGI Symbol	1	adipocyte-related X-chromosome expressed sequence 1 [Source:MGI Symbol;Acc:MGI:1923469]	-0.195838	4.24982	-1.75674	0.0847208	0.999227	-5.1526
ENSMUSG00000020331	Hcn2	protein_coding	MGI Symbol	2	hyperpolarization-activated, cyclic nucleotide-gated K+ 2 [Source:MGI Symbol;Acc:MGI:1298210]	-0.303122	1.7952	-1.463	0.149357	0.999227	-5.15309
ENSMUSG00000086596	Susd5	protein_coding	MGI Symbol	1	sushi domain containing 5 [Source:MGI Symbol;Acc:MGI:2685972]	-0.332397	-0.0907111	-1.12858	0.264141	0.999227	-5.15328
ENSMUSG00000087633	Gm14455	antisense	MGI Symbol	1	predicted gene 14455 [Source:MGI Symbol;Acc:MGI:3711286]	-0.314283	-0.00408425	-1.16	0.251234	0.999227	-5.15333
ENSMUSG00000109162	2900027M19Rik	TEC	MGI Symbol	1	RIKEN cDNA 2900027M19 gene [Source:MGI Symbol;Acc:MGI:1920130]	0.49975	-0.70284	0.883293	0.381055	0.999227	-5.15348
ENSMUSG00000032477	Cdc25a	protein_coding	MGI Symbol	7	cell division cycle 25A [Source:MGI Symbol;Acc:MGI:103198]	0.229894	2.38018	1.48535	0.143358	0.999227	-5.1536
ENSMUSG00000032400	Zwilch	protein_coding	MGI Symbol	13	zwilch kinetochore protein [Source:MGI Symbol;Acc:MGI:1915264]	0.30621	0.680035	1.1838	0.24176	0.999227	-5.15365
ENSMUSG00000033595	Lgi3	protein_coding	MGI Symbol	3	leucine-rich repeat LGI family, member 3 [Source:MGI Symbol;Acc:MGI:2182619]	-0.217287	5.81679	-1.86521	0.0676749	0.999227	-5.1539
ENSMUSG00000097462	9530026P05Rik	antisense	MGI Symbol	6	RIKEN cDNA 9530026P05 gene [Source:MGI Symbol;Acc:MGI:1924659]	0.313565	1.44807	1.32083	0.192217	0.999227	-5.15434
ENSMUSG00000032531	Amotl2	protein_coding	MGI Symbol	14	angiomotin-like 2 [Source:MGI Symbol;Acc:MGI:1929286]	-0.279284	2.85105	-1.60787	0.113788	0.999227	-5.15444
ENSMUSG00000063897	CAAA01118383.1	protein_coding	Clone-based (Ensembl) gene	1	dehydrogenase/reductase (SDR family) X chromosome [Source:NCBI gene;Acc:236082]	-0.365304	1.25794	-1.38432	0.172045	0.999227	-5.15527
ENSMUSG00000072640	Lyrm9	protein_coding	MGI Symbol	3	LYR motif containing 9 [Source:MGI Symbol;Acc:MGI:1913524]	0.156601	5.48262	1.82954	0.0729299	0.999227	-5.15776
ENSMUSG00000040774	Cept1	protein_coding	MGI Symbol	7	choline/ethanolaminephosphotransferase 1 [Source:MGI Symbol;Acc:MGI:2139793]	-0.202711	4.92221	-1.81223	0.0756	0.999227	-5.15852
ENSMUSG00000026226	Spata3	protein_coding	MGI Symbol	11	spermatogenesis associated 3 [Source:MGI Symbol;Acc:MGI:1917310]	-0.291644	0.321551	-1.20311	0.234264	0.999227	-5.15862
ENSMUSG00000104918	Gm42944	TEC	MGI Symbol	1	predicted gene 42944 [Source:MGI Symbol;Acc:MGI:5663081]	0.417012	0.00923527	1.0373	0.304292	0.999227	-5.15881
ENSMUSG00000026548	Slamf9	protein_coding	MGI Symbol	1	SLAM family member 9 [Source:MGI Symbol;Acc:MGI:1923692]	0.380052	-0.532264	0.937933	0.352521	0.999227	-5.15962
ENSMUSG00000104293	Gm38043	TEC	MGI Symbol	1	predicted gene, 38043 [Source:MGI Symbol;Acc:MGI:5611271]	0.483798	-0.435424	0.934866	0.354085	0.999227	-5.15976
ENSMUSG00000045004	Spata21	protein_coding	MGI Symbol	2	spermatogenesis associated 21 [Source:MGI Symbol;Acc:MGI:3607787]	-0.448947	-0.57253	-0.983402	0.329864	0.999227	-5.16118
ENSMUSG00000030110	Ret	protein_coding	MGI Symbol	2	ret proto-oncogene [Source:MGI Symbol;Acc:MGI:97902]	-0.368392	-0.31843	-1.06256	0.292786	0.999227	-5.16219
ENSMUSG00000001555	Fkbp10	protein_coding	MGI Symbol	5	FK506 binding protein 10 [Source:MGI Symbol;Acc:MGI:104769]	-0.28904	1.99559	-1.48192	0.144265	0.999227	-5.16284
ENSMUSG00000086909	Gm4926	lincRNA	MGI Symbol	1	predicted gene 4926 [Source:MGI Symbol;Acc:MGI:3646427]	0.432289	-0.345089	0.932806	0.355138	0.999227	-5.16347
ENSMUSG00000049396	Gemin4	protein_coding	MGI Symbol	2	gem nuclear organelle associated protein 4 [Source:MGI Symbol;Acc:MGI:2449313]	0.244255	-0.280241	1.01882	0.312903	0.999227	-5.1635
ENSMUSG00000086017	Gm11872	antisense	MGI Symbol	1	predicted gene 11872 [Source:MGI Symbol;Acc:MGI:3649333]	0.35023	-0.155353	1.01716	0.313683	0.999227	-5.16351
ENSMUSG00000083139	Gm12418	processed_pseudogene	MGI Symbol	1	predicted gene 12418 [Source:MGI Symbol;Acc:MGI:3650582]	0.281535	-0.0417145	1.08716	0.281873	0.999227	-5.16363
ENSMUSG00000049916	2610318N02Rik	protein_coding	MGI Symbol	8	RIKEN cDNA 2610318N02 gene [Source:MGI Symbol;Acc:MGI:1917708]	0.350128	0.0694732	1.09534	0.278306	0.999227	-5.16381
ENSMUSG00000044702	Palb2	protein_coding	MGI Symbol	9	partner and localizer of BRCA2 [Source:MGI Symbol;Acc:MGI:3040695]	-0.31608	0.379078	-1.21125	0.231156	0.999227	-5.16401
ENSMUSG00000023921	Mmut	protein_coding	MGI Symbol	2	methylmalonyl-Coenzyme A mutase [Source:MGI Symbol;Acc:MGI:97239]	0.176567	5.3589	1.82176	0.0741204	0.999227	-5.16453
ENSMUSG00000005357	Slc1a6	protein_coding	MGI Symbol	2	solute carrier family 1 (high affinity aspartate/glutamate transporter), member 6 [Source:MGI Symbol;Acc:MGI:1096331]	-0.241217	2.23066	-1.52044	0.134326	0.999227	-5.16459
ENSMUSG00000096215	Smim22	protein_coding	MGI Symbol	8	small integral membrane protein 22 [Source:MGI Symbol;Acc:MGI:3643379]	-0.781088	-1.63024	-0.901746	0.371259	0.999227	-5.16569
ENSMUSG00000115503	Gm6392	processed_pseudogene	MGI Symbol	1	predicted gene 6392 [Source:MGI Symbol;Acc:MGI:3644256]	0.212991	1.32033	1.32248	0.19167	0.999227	-5.1664
ENSMUSG00000102579	Gm37965	TEC	MGI Symbol	1	predicted gene, 37965 [Source:MGI Symbol;Acc:MGI:5611193]	-0.485239	-0.917312	-0.995465	0.32402	0.999227	-5.16653
ENSMUSG00000106826	Gm42583	TEC	MGI Symbol	1	predicted gene 42583 [Source:MGI Symbol;Acc:MGI:5662720]	0.549131	1.51452	1.295	0.200916	0.999227	-5.16676
ENSMUSG00000057789	Bak1	protein_coding	MGI Symbol	4	BCL2-antagonist/killer 1 [Source:MGI Symbol;Acc:MGI:1097161]	-0.266846	0.885521	-1.2984	0.199755	0.999227	-5.16744
ENSMUSG00000079467	Gm14966	antisense	MGI Symbol	2	predicted gene 14966 [Source:MGI Symbol;Acc:MGI:3705223]	0.335785	-0.501102	0.955773	0.343514	0.999227	-5.16756
ENSMUSG00000050212	Eva1b	protein_coding	MGI Symbol	3	eva-1 homolog B (C. elegans) [Source:MGI Symbol;Acc:MGI:1922063]	-0.42404	-0.272986	-1.1212	0.267242	0.999227	-5.16767
ENSMUSG00000035455	Fignl1	protein_coding	MGI Symbol	7	fidgetin-like 1 [Source:MGI Symbol;Acc:MGI:1890648]	-0.305548	0.281687	-1.19609	0.236967	0.999227	-5.16827
ENSMUSG00000003190	Bcl2l12	protein_coding	MGI Symbol	6	BCL2-like 12 (proline rich) [Source:MGI Symbol;Acc:MGI:1922986]	0.282758	0.179023	1.09228	0.279638	0.999227	-5.16865
ENSMUSG00000086022	Rad51ap2	protein_coding	MGI Symbol	1	RAD51 associated protein 2 [Source:MGI Symbol;Acc:MGI:3644580]	-0.295268	0.505318	-1.24724	0.217777	0.999227	-5.16907
ENSMUSG00000113184	Gm49654	lincRNA	MGI Symbol	1	predicted gene, 49654 [Source:MGI Symbol;Acc:MGI:6215088]	-0.296551	-0.0286636	-1.1326	0.262463	0.999227	-5.16909
ENSMUSG00000029910	Mad2l1	protein_coding	MGI Symbol	4	MAD2 mitotic arrest deficient-like 1 [Source:MGI Symbol;Acc:MGI:1860374]	-0.179117	3.58096	-1.67951	0.0989207	0.999227	-5.16945
ENSMUSG00000038840	Birc7	protein_coding	MGI Symbol	2	baculoviral IAP repeat-containing 7 (livin) [Source:MGI Symbol;Acc:MGI:2676458]	-0.367109	-0.336468	-1.07464	0.287391	0.999227	-5.16981
ENSMUSG00000055633	Zfp580	protein_coding	MGI Symbol	2	zinc finger protein 580 [Source:MGI Symbol;Acc:MGI:1916242]	-0.373388	3.62728	-1.69646	0.0956479	0.999227	-5.17013
ENSMUSG00000053181	A830005F24Rik	protein_coding	MGI Symbol	1	RIKEN cDNA A830005F24 gene [Source:MGI Symbol;Acc:MGI:3045249]	0.306065	1.25408	1.29917	0.199492	0.999227	-5.17023
ENSMUSG00000006931	P3h4	protein_coding	MGI Symbol	2	prolyl 3-hydroxylase family member 4 (non-enzymatic) [Source:MGI Symbol;Acc:MGI:1913430]	-0.245171	2.53496	-1.54398	0.128526	0.999227	-5.1705
ENSMUSG00000073016	Uprt	protein_coding	MGI Symbol	1	uracil phosphoribosyltransferase [Source:MGI Symbol;Acc:MGI:2685620]	0.446457	-0.266479	0.957529	0.342635	0.999227	-5.17184
ENSMUSG00000028885	Smpdl3b	protein_coding	MGI Symbol	1	sphingomyelin phosphodiesterase, acid-like 3B [Source:MGI Symbol;Acc:MGI:1916022]	0.461711	0.156453	1.05659	0.295479	0.999227	-5.17239
ENSMUSG00000001983	Taco1	protein_coding	MGI Symbol	1	translational activator of mitochondrially encoded cytochrome c oxidase I [Source:MGI Symbol;Acc:MGI:1917457]	0.216173	3.07695	1.57463	0.121276	0.999227	-5.17239
ENSMUSG00000105828	Gm43048	TEC	MGI Symbol	1	predicted gene 43048 [Source:MGI Symbol;Acc:MGI:5663185]	0.492374	-0.548834	0.893338	0.375703	0.999227	-5.17241
ENSMUSG00000021337	Scgn	protein_coding	MGI Symbol	3	secretagogin, EF-hand calcium binding protein [Source:MGI Symbol;Acc:MGI:2384873]	-0.24904	3.09648	-1.60307	0.114845	0.999227	-5.17276
ENSMUSG00000073737	Gm10566	processed_pseudogene	MGI Symbol	1	predicted gene 10566 [Source:MGI Symbol;Acc:MGI:3642220]	-0.25815	-0.0907842	-1.14355	0.257935	0.999227	-5.17476
ENSMUSG00000004270	Lpcat3	protein_coding	MGI Symbol	9	lysophosphatidylcholine acyltransferase 3 [Source:MGI Symbol;Acc:MGI:1315211]	-0.178533	3.59271	-1.67337	0.100129	0.999227	-5.1767
ENSMUSG00000038146	Notch3	protein_coding	MGI Symbol	3	notch 3 [Source:MGI Symbol;Acc:MGI:99460]	-0.329352	0.629124	-1.24284	0.219382	0.999227	-5.17679
ENSMUSG00000072582	Ptrh2	protein_coding	MGI Symbol	2	peptidyl-tRNA hydrolase 2 [Source:MGI Symbol;Acc:MGI:2444848]	-0.13637	5.10435	-1.8077	0.0763119	0.999227	-5.17795
ENSMUSG00000056737	Capg	protein_coding	MGI Symbol	11	capping protein (actin filament), gelsolin-like [Source:MGI Symbol;Acc:MGI:1098259]	-0.279466	1.75458	-1.42681	0.159483	0.999227	-5.17969
ENSMUSG00000105147	Ckb-ps1	processed_pseudogene	MGI Symbol	1	creatine kinase, brain, pseudogene 1 [Source:MGI Symbol;Acc:MGI:5645789]	0.259173	-0.317004	0.98908	0.327105	0.999227	-5.17993
ENSMUSG00000045248	Med26	protein_coding	MGI Symbol	1	mediator complex subunit 26 [Source:MGI Symbol;Acc:MGI:1917875]	-0.255886	2.20818	-1.49752	0.140173	0.999227	-5.18097
ENSMUSG00000039850	Endov	protein_coding	MGI Symbol	11	endonuclease V [Source:MGI Symbol;Acc:MGI:2444688]	0.153353	4.47575	1.73418	0.0886821	0.999227	-5.18126
ENSMUSG00000038233	Gask1a	protein_coding	MGI Symbol	4	golgi associated kinase 1A [Source:MGI Symbol;Acc:MGI:3041196]	-0.326397	1.45701	-1.39436	0.169011	0.999227	-5.18218
ENSMUSG00000069806	Cacng7	protein_coding	MGI Symbol	2	calcium channel, voltage-dependent, gamma subunit 7 [Source:MGI Symbol;Acc:MGI:1932374]	-0.257649	1.97188	-1.46471	0.148889	0.999227	-5.18243
ENSMUSG00000032492	Pth1r	protein_coding	MGI Symbol	6	parathyroid hormone 1 receptor [Source:MGI Symbol;Acc:MGI:97801]	-0.278191	1.1212	-1.30163	0.198655	0.999227	-5.18446
ENSMUSG00000047910	Pcdhb16	protein_coding	MGI Symbol	1	protocadherin beta 16 [Source:MGI Symbol;Acc:MGI:2136752]	-0.272072	1.71814	-1.42291	0.160606	0.999227	-5.18472
ENSMUSG00000020709	Adap2	protein_coding	MGI Symbol	2	ArfGAP with dual PH domains 2 [Source:MGI Symbol;Acc:MGI:2663075]	0.205936	2.68454	1.51735	0.135104	0.999227	-5.18493
ENSMUSG00000032537	Ephb1	protein_coding	MGI Symbol	6	Eph receptor B1 [Source:MGI Symbol;Acc:MGI:1096337]	-0.227762	4.05482	-1.72121	0.091029	0.999227	-5.18505
ENSMUSG00000043866	Taf10	protein_coding	MGI Symbol	4	TATA-box binding protein associated factor 10 [Source:MGI Symbol;Acc:MGI:1346320]	-0.232381	2.80312	-1.58218	0.119541	0.999227	-5.18527
ENSMUSG00000062151	Unc13c	protein_coding	MGI Symbol	2	unc-13 homolog C [Source:MGI Symbol;Acc:MGI:2149021]	0.319751	2.30077	1.46575	0.148606	0.999227	-5.18528
ENSMUSG00000019214	Chtf18	protein_coding	MGI Symbol	8	CTF18, chromosome transmission fidelity factor 18 [Source:MGI Symbol;Acc:MGI:2384887]	0.432553	0.231643	1.06224	0.292927	0.999227	-5.18708
ENSMUSG00000023495	Pcbp4	protein_coding	MGI Symbol	23	poly(rC) binding protein 4 [Source:MGI Symbol;Acc:MGI:1890471]	-0.351848	5.94398	-1.85865	0.0686169	0.999227	-5.18737
ENSMUSG00000020154	Ptprb	protein_coding	MGI Symbol	4	protein tyrosine phosphatase, receptor type, B [Source:MGI Symbol;Acc:MGI:97809]	-0.427928	1.88187	-1.47097	0.147195	0.999227	-5.18772
ENSMUSG00000097207	6030443J06Rik	lincRNA	MGI Symbol	5	RIKEN cDNA 6030443J06 gene [Source:MGI Symbol;Acc:MGI:2444595]	0.32919	0.0340815	1.05011	0.29842	0.999227	-5.188
ENSMUSG00000082793	Gm9308	processed_pseudogene	MGI Symbol	1	predicted gene 9308 [Source:MGI Symbol;Acc:MGI:3647522]	-0.288394	0.242339	-1.15128	0.254768	0.999227	-5.1887
ENSMUSG00000021200	Asb2	protein_coding	MGI Symbol	4	ankyrin repeat and SOCS box-containing 2 [Source:MGI Symbol;Acc:MGI:1929743]	0.488776	-0.48657	0.867687	0.389466	0.999227	-5.18882
ENSMUSG00000002565	Scin	protein_coding	MGI Symbol	2	scinderin [Source:MGI Symbol;Acc:MGI:1306794]	-0.350357	-0.434328	-1.00616	0.318898	0.999227	-5.18916
ENSMUSG00000074782	4833422C13Rik	antisense	MGI Symbol	3	RIKEN cDNA 4833422C13 gene [Source:MGI Symbol;Acc:MGI:3603826]	-0.224602	3.03019	-1.60742	0.113886	0.999227	-5.18953
ENSMUSG00000056023	Gm9989	processed_transcript	MGI Symbol	2	predicted gene 9989 [Source:MGI Symbol;Acc:MGI:3642361]	0.374514	-0.200752	0.983643	0.329747	0.999227	-5.18966
ENSMUSG00000000682	Cd52	protein_coding	MGI Symbol	3	CD52 antigen [Source:MGI Symbol;Acc:MGI:1346088]	0.389606	1.02815	1.22039	0.227704	0.999227	-5.1898
ENSMUSG00000115124	Gm49201	lincRNA	MGI Symbol	1	predicted gene, 49201 [Source:MGI Symbol;Acc:MGI:6118649]	0.298524	0.541117	1.14598	0.256938	0.999227	-5.1904
ENSMUSG00000073805	Insyn2a	protein_coding	MGI Symbol	3	inhibitory synaptic factor 2A [Source:MGI Symbol;Acc:MGI:3605068]	0.193142	3.06957	1.55643	0.12554	0.999227	-5.19075
ENSMUSG00000002981	Clptm1	protein_coding	MGI Symbol	9	cleft lip and palate associated transmembrane protein 1 [Source:MGI Symbol;Acc:MGI:1927155]	-0.206899	5.50663	-1.83079	0.072739	0.999227	-5.19091
ENSMUSG00000035517	Tdrd7	protein_coding	MGI Symbol	5	tudor domain containing 7 [Source:MGI Symbol;Acc:MGI:2140279]	-0.150892	4.36324	-1.74	0.0876452	0.999227	-5.19143
ENSMUSG00000027422	Rrbp1	protein_coding	MGI Symbol	8	ribosome binding protein 1 [Source:MGI Symbol;Acc:MGI:1932395]	-0.235191	3.59527	-1.6603	0.102743	0.999227	-5.19222
ENSMUSG00000040972	Igsf21	protein_coding	MGI Symbol	1	immunoglobulin superfamily, member 21 [Source:MGI Symbol;Acc:MGI:2681842]	-0.256167	2.91015	-1.57668	0.120802	0.999227	-5.19248
ENSMUSG00000106189	Gm42933	processed_pseudogene	MGI Symbol	1	predicted gene 42933 [Source:MGI Symbol;Acc:MGI:5663070]	0.265401	-0.24433	1.01687	0.313819	0.999227	-5.19342
ENSMUSG00000039410	Prdm16	protein_coding	MGI Symbol	13	PR domain containing 16 [Source:MGI Symbol;Acc:MGI:1917923]	-0.218963	4.09011	-1.71598	0.0919883	0.999227	-5.19368
ENSMUSG00000021704	Mtx3	protein_coding	MGI Symbol	3	metaxin 3 [Source:MGI Symbol;Acc:MGI:2686040]	0.182414	4.46286	1.72361	0.0905897	0.999227	-5.19411
ENSMUSG00000000365	Rnf17	protein_coding	MGI Symbol	6	ring finger protein 17 [Source:MGI Symbol;Acc:MGI:1353419]	-0.463944	-0.446448	-1.001	0.32136	0.999227	-5.19423
ENSMUSG00000026156	B3gat2	protein_coding	MGI Symbol	3	beta-1,3-glucuronyltransferase 2 (glucuronosyltransferase S) [Source:MGI Symbol;Acc:MGI:2389490]	-0.23172	2.24935	-1.48199	0.144248	0.999227	-5.19437
ENSMUSG00000020745	Pafah1b1	protein_coding	MGI Symbol	5	platelet-activating factor acetylhydrolase, isoform 1b, subunit 1 [Source:MGI Symbol;Acc:MGI:109520]	0.147504	7.76139	1.88123	0.0654216	0.999227	-5.19451
ENSMUSG00000083780	Gm12728	protein_coding	MGI Symbol	3	predicted gene 12728 [Source:MGI Symbol;Acc:MGI:3649486]	-0.286437	0.228027	-1.15571	0.252969	0.999227	-5.19488
ENSMUSG00000020890	Gucy2e	protein_coding	MGI Symbol	4	guanylate cyclase 2e [Source:MGI Symbol;Acc:MGI:105123]	-0.251214	1.65463	-1.40953	0.164501	0.999227	-5.19491
ENSMUSG00000097296	Gm26532	lincRNA	MGI Symbol	1	predicted gene, 26532 [Source:MGI Symbol;Acc:MGI:5477026]	-0.368097	0.368505	-1.15925	0.251534	0.999227	-5.19492
ENSMUSG00000107985	Gm35037	lincRNA	MGI Symbol	1	predicted gene, 35037 [Source:MGI Symbol;Acc:MGI:5594196]	0.32901	1.77114	1.34899	0.18306	0.999227	-5.1954
ENSMUSG00000045045	Lrfn4	protein_coding	MGI Symbol	2	leucine rich repeat and fibronectin type III domain containing 4 [Source:MGI Symbol;Acc:MGI:2385612]	-0.326283	2.09122	-1.49141	0.141765	0.999227	-5.19626
ENSMUSG00000042510	AA986860	protein_coding	MGI Symbol	3	expressed sequence AA986860 [Source:MGI Symbol;Acc:MGI:2138143]	0.276237	0.776216	1.16573	0.248926	0.999227	-5.19632
ENSMUSG00000046541	Zfp526	protein_coding	MGI Symbol	1	zinc finger protein 526 [Source:MGI Symbol;Acc:MGI:2445181]	0.243175	1.36702	1.27393	0.208229	0.999227	-5.19658
ENSMUSG00000025877	Hk3	protein_coding	MGI Symbol	8	hexokinase 3 [Source:MGI Symbol;Acc:MGI:2670962]	0.394296	-0.105317	0.984707	0.329229	0.999227	-5.19679
ENSMUSG00000083623	Gm7224	unprocessed_pseudogene	MGI Symbol	1	predicted gene 7224 [Source:MGI Symbol;Acc:MGI:3647435]	0.266935	0.154534	1.05713	0.295233	0.999227	-5.19732
ENSMUSG00000073982	Rhog	protein_coding	MGI Symbol	3	ras homolog family member G [Source:MGI Symbol;Acc:MGI:1928370]	-0.213723	5.19255	-1.80939	0.0760461	0.999227	-5.19754
ENSMUSG00000103711	Tstd1	protein_coding	MGI Symbol	3	thiosulfate sulfurtransferase (rhodanese)-like domain containing 1 [Source:MGI Symbol;Acc:MGI:3648482]	0.28489	0.216054	1.0902	0.280541	0.999227	-5.19793
ENSMUSG00000118499	AC160138.1	processed_pseudogene	Clone-based (Ensembl) gene	1	eukaryotic translation initiation factor 1 (Eif1) pseudogene	0.19871	0.675272	1.17667	0.244571	0.999227	-5.19887
ENSMUSG00000030123	Plxnd1	protein_coding	MGI Symbol	5	plexin D1 [Source:MGI Symbol;Acc:MGI:2154244]	-0.24702	2.28458	-1.46787	0.148033	0.999227	-5.19937
ENSMUSG00000046408	1700067K01Rik	protein_coding	MGI Symbol	4	RIKEN cDNA 1700067K01 gene [Source:MGI Symbol;Acc:MGI:1920703]	-0.376508	-0.669931	-1.02463	0.310178	0.999227	-5.19975
ENSMUSG00000024583	Txnl1	protein_coding	MGI Symbol	8	thioredoxin-like 1 [Source:MGI Symbol;Acc:MGI:1860078]	-0.181117	7.28915	-1.87415	0.0664097	0.999227	-5.20117
ENSMUSG00000024486	Hbegf	protein_coding	MGI Symbol	3	heparin-binding EGF-like growth factor [Source:MGI Symbol;Acc:MGI:96070]	-0.221386	2.97089	-1.56766	0.122895	0.999227	-5.20153
ENSMUSG00000031703	Itfg1	protein_coding	MGI Symbol	4	integrin alpha FG-GAP repeat containing 1 [Source:MGI Symbol;Acc:MGI:106419]	-0.236256	6.14952	-1.85187	0.0696016	0.999227	-5.20163
ENSMUSG00000041594	Tmtc4	protein_coding	MGI Symbol	13	transmembrane and tetratricopeptide repeat containing 4 [Source:MGI Symbol;Acc:MGI:1921050]	0.260961	2.84577	1.52966	0.132029	0.999227	-5.2019
ENSMUSG00000095677	Dynlt1f	protein_coding	MGI Symbol	2	dynein light chain Tctex-type 1F [Source:MGI Symbol;Acc:MGI:3780996]	0.232649	1.16438	1.24185	0.219742	0.999227	-5.20225
ENSMUSG00000036091	Hyal3	protein_coding	MGI Symbol	3	hyaluronoglucosaminidase 3 [Source:MGI Symbol;Acc:MGI:1330288]	0.357243	-0.522509	0.878745	0.383495	0.999227	-5.20233
ENSMUSG00000104864	Gm43655	processed_pseudogene	MGI Symbol	1	predicted gene 43655 [Source:MGI Symbol;Acc:MGI:5663792]	-0.259638	0.59455	-1.22394	0.226372	0.999227	-5.20249
ENSMUSG00000085316	D330050G23Rik	lincRNA	MGI Symbol	3	RIKEN cDNA D330050G23 gene [Source:MGI Symbol;Acc:MGI:2445155]	0.232057	1.75168	1.35435	0.181355	0.999227	-5.20325
ENSMUSG00000053560	Ier2	protein_coding	MGI Symbol	1	immediate early response 2 [Source:MGI Symbol;Acc:MGI:104815]	-0.5873	2.47378	-1.56957	0.122448	0.999227	-5.20433
ENSMUSG00000046999	1110032F04Rik	protein_coding	MGI Symbol	1	RIKEN cDNA 1110032F04 gene [Source:MGI Symbol;Acc:MGI:1915975]	-0.280599	1.97235	-1.44788	0.153523	0.999227	-5.20469
ENSMUSG00000030731	Syt3	protein_coding	MGI Symbol	6	synaptotagmin III [Source:MGI Symbol;Acc:MGI:99665]	-0.227132	4.97707	-1.78857	0.0793824	0.999227	-5.20475
ENSMUSG00000054409	Tmem74	protein_coding	MGI Symbol	1	transmembrane protein 74 [Source:MGI Symbol;Acc:MGI:2443417]	0.248869	2.67064	1.48902	0.142393	0.999227	-5.20546
ENSMUSG00000070366	Plpp4	protein_coding	MGI Symbol	5	phospholipid phosphatase 4 [Source:MGI Symbol;Acc:MGI:2685936]	0.333896	1.88922	1.36351	0.178469	0.999227	-5.20654
ENSMUSG00000069919	Hba-a1	protein_coding	MGI Symbol	2	hemoglobin alpha, adult chain 1 [Source:MGI Symbol;Acc:MGI:96015]	-0.469121	6.38105	-1.858	0.0687114	0.999227	-5.20672
ENSMUSG00000030688	Stard10	protein_coding	MGI Symbol	11	START domain containing 10 [Source:MGI Symbol;Acc:MGI:1860093]	-0.218971	3.20653	-1.61608	0.111997	0.999227	-5.20676
ENSMUSG00000036957	Lrfn3	protein_coding	MGI Symbol	1	leucine rich repeat and fibronectin type III domain containing 3 [Source:MGI Symbol;Acc:MGI:2442512]	-0.271801	3.42291	-1.64625	0.105613	0.999227	-5.20727
ENSMUSG00000027355	Tmco5	protein_coding	MGI Symbol	4	transmembrane and coiled-coil domains 5 [Source:MGI Symbol;Acc:MGI:1914606]	0.363626	0.860597	1.13541	0.261298	0.999227	-5.20757
ENSMUSG00000113660	Gm5626	processed_pseudogene	MGI Symbol	1	predicted gene 5626 [Source:MGI Symbol;Acc:MGI:3779505]	0.266793	1.04043	1.21536	0.2296	0.999227	-5.20833
ENSMUSG00000105199	Gm43581	sense_intronic	MGI Symbol	1	predicted gene 43581 [Source:MGI Symbol;Acc:MGI:5663718]	-0.516333	-0.468559	-1.0311	0.307162	0.999227	-5.20874
ENSMUSG00000030004	Nat8	protein_coding	MGI Symbol	1	N-acetyltransferase 8 (GCN5-related) [Source:MGI Symbol;Acc:MGI:1915646]	-0.349258	0.545792	-1.22353	0.226525	0.999227	-5.20915
ENSMUSG00000024736	Tmem132a	protein_coding	MGI Symbol	4	transmembrane protein 132A [Source:MGI Symbol;Acc:MGI:2147810]	-0.420675	3.24454	-1.62543	0.109985	0.999227	-5.20922
ENSMUSG00000086446	Prkag2os1	antisense	MGI Symbol	1	protein kinase, AMP-activated, gamma 2 non-catalytic subunit, opposite strand 1 [Source:MGI Symbol;Acc:MGI:1918411]	0.374354	-0.904232	0.761344	0.449816	0.999227	-5.20935
ENSMUSG00000084845	Tmem240	protein_coding	MGI Symbol	3	transmembrane protein 240 [Source:MGI Symbol;Acc:MGI:3648074]	-0.308161	2.6671	-1.56564	0.123368	0.999227	-5.2095
ENSMUSG00000110279	Gm45552	antisense	MGI Symbol	1	predicted gene 45552 [Source:MGI Symbol;Acc:MGI:5791388]	0.329875	0.83431	1.19054	0.239125	0.999227	-5.20965
ENSMUSG00000044548	Dact1	protein_coding	MGI Symbol	2	dishevelled-binding antagonist of beta-catenin 1 [Source:MGI Symbol;Acc:MGI:1891740]	0.378758	0.67756	1.15617	0.25278	0.999227	-5.21034
ENSMUSG00000081787	Gm13991	processed_pseudogene	MGI Symbol	1	predicted gene 13991 [Source:MGI Symbol;Acc:MGI:3651689]	0.272648	-0.409487	0.927509	0.357854	0.999227	-5.21044
ENSMUSG00000113743	Gm8712	processed_pseudogene	MGI Symbol	1	predicted gene 8712 [Source:MGI Symbol;Acc:MGI:3644353]	-0.393352	0.578994	-1.2229	0.226761	0.999227	-5.21078
ENSMUSG00000073739	Gm16287	antisense	MGI Symbol	1	predicted gene 16287 [Source:MGI Symbol;Acc:MGI:3650322]	-0.289584	0.133894	-1.09254	0.27952	0.999227	-5.21089
ENSMUSG00000016493	Cd46	protein_coding	MGI Symbol	4	CD46 antigen, complement regulatory protein [Source:MGI Symbol;Acc:MGI:1203290]	0.337915	0.309845	1.08304	0.283678	0.999227	-5.21107
ENSMUSG00000097934	6720483E21Rik	lincRNA	MGI Symbol	1	RIKEN cDNA 6720483E21 gene [Source:MGI Symbol;Acc:MGI:1924991]	-0.344561	-0.200647	-1.0689	0.289944	0.999227	-5.21148
ENSMUSG00000117478	BC051408	lincRNA	MGI Symbol	1	cDNA sequence BC051408 [Source:MGI Symbol;Acc:MGI:3040685]	-0.358161	-0.224399	-1.09089	0.280241	0.999227	-5.21163
ENSMUSG00000110342	Gm45263	TEC	MGI Symbol	1	predicted gene 45263 [Source:MGI Symbol;Acc:MGI:5791099]	-0.603885	-0.671082	-0.948231	0.347303	0.999227	-5.21218
ENSMUSG00000041219	Arhgap11a	protein_coding	MGI Symbol	4	Rho GTPase activating protein 11A [Source:MGI Symbol;Acc:MGI:2444300]	0.333315	0.137366	1.0094	0.317357	0.999227	-5.21222
ENSMUSG00000102748	Pcdhgb2	protein_coding	MGI Symbol	2	protocadherin gamma subfamily B, 2 [Source:MGI Symbol;Acc:MGI:1935170]	0.409308	-0.549154	0.805181	0.424302	0.999227	-5.21248
ENSMUSG00000032648	Pygm	protein_coding	MGI Symbol	4	muscle glycogen phosphorylase [Source:MGI Symbol;Acc:MGI:97830]	0.23397	3.9512	1.65485	0.103848	0.999227	-5.2125
ENSMUSG00000022892	App	protein_coding	MGI Symbol	11	amyloid beta (A4) precursor protein [Source:MGI Symbol;Acc:MGI:88059]	-0.275556	8.81229	-1.88436	0.064989	0.999227	-5.2139
ENSMUSG00000118537	Shld3	protein_coding	MGI Symbol	1	shieldin complex subunit 3 [Source:MGI Symbol;Acc:MGI:6194609]	-0.217722	2.17871	-1.47549	0.145979	0.999227	-5.21438
ENSMUSG00000073647	Gm10557	processed_pseudogene	MGI Symbol	1	predicted gene 10557 [Source:MGI Symbol;Acc:MGI:3708638]	-0.295736	1.0968	-1.2847	0.204469	0.999227	-5.21446
ENSMUSG00000108713	Gm33027	lincRNA	MGI Symbol	1	predicted gene, 33027 [Source:MGI Symbol;Acc:MGI:5592186]	0.333097	0.292373	1.06554	0.291447	0.999227	-5.2151
ENSMUSG00000104546	Gm43858	TEC	MGI Symbol	1	predicted gene 43858 [Source:MGI Symbol;Acc:MGI:5663995]	-0.411072	0.0268812	-1.1023	0.275297	0.999227	-5.21521
ENSMUSG00000096438	Gapdh-ps15	processed_pseudogene	MGI Symbol	1	glyceraldehyde-3-phosphate dehydrogenase, pseudogene 15 [Source:MGI Symbol;Acc:MGI:5434255]	0.270348	-0.436713	0.889304	0.377847	0.999227	-5.2159
ENSMUSG00000108778	Gm20083	lincRNA	MGI Symbol	2	predicted gene, 20083 [Source:MGI Symbol;Acc:MGI:5012268]	-0.333389	0.0534572	-1.10867	0.272562	0.999227	-5.21838
ENSMUSG00000036606	Plxnb2	protein_coding	MGI Symbol	8	plexin B2 [Source:MGI Symbol;Acc:MGI:2154239]	-0.253865	3.73613	-1.66499	0.1018	0.999227	-5.21864
ENSMUSG00000026988	Wdsub1	protein_coding	MGI Symbol	12	WD repeat, SAM and U-box domain containing 1 [Source:MGI Symbol;Acc:MGI:1919387]	-0.145816	3.72618	-1.66101	0.1026	0.999227	-5.21866
ENSMUSG00000097350	4732491K20Rik	bidirectional_promoter_lncRNA	MGI Symbol	1	RIKEN cDNA 4732491K20 gene [Source:MGI Symbol;Acc:MGI:3026975]	0.220921	2.04952	1.39877	0.167688	0.999227	-5.21917
ENSMUSG00000022309	Angpt1	protein_coding	MGI Symbol	2	angiopoietin 1 [Source:MGI Symbol;Acc:MGI:108448]	-0.269007	1.09946	-1.26652	0.210847	0.999227	-5.22051
ENSMUSG00000020651	Slc26a4	protein_coding	MGI Symbol	2	solute carrier family 26, member 4 [Source:MGI Symbol;Acc:MGI:1346029]	0.163679	4.26717	1.68548	0.0977584	0.999227	-5.22051
ENSMUSG00000006398	Cdc20	protein_coding	MGI Symbol	3	cell division cycle 20 [Source:MGI Symbol;Acc:MGI:1859866]	0.425475	-0.425443	0.908076	0.367937	0.999227	-5.22117
ENSMUSG00000070047	Fat1	protein_coding	MGI Symbol	6	FAT atypical cadherin 1 [Source:MGI Symbol;Acc:MGI:109168]	-0.272612	2.62439	-1.51916	0.134649	0.999227	-5.22144
ENSMUSG00000102990	Gm37764	TEC	MGI Symbol	1	predicted gene, 37764 [Source:MGI Symbol;Acc:MGI:5610992]	0.266669	0.0979031	1.02068	0.312031	0.999227	-5.22166
ENSMUSG00000066554	Gm10167	processed_pseudogene	MGI Symbol	1	predicted pseudogene 10167 [Source:MGI Symbol;Acc:MGI:3704263]	-0.259981	0.512302	-1.20631	0.23304	0.999227	-5.22182
ENSMUSG00000097414	B130046B21Rik	antisense	MGI Symbol	3	RIKEN cDNA B130046B21 gene [Source:MGI Symbol;Acc:MGI:3704458]	0.28357	-0.214556	0.969556	0.336659	0.999227	-5.22205
ENSMUSG00000057751	Megf6	protein_coding	MGI Symbol	7	multiple EGF-like-domains 6 [Source:MGI Symbol;Acc:MGI:1919351]	-0.423959	-0.444509	-0.952995	0.344906	0.999227	-5.22241
ENSMUSG00000024327	Slc39a7	protein_coding	MGI Symbol	6	solute carrier family 39 (zinc transporter), member 7 [Source:MGI Symbol;Acc:MGI:95909]	-0.250603	1.0308	-1.27652	0.207322	0.999227	-5.22289
ENSMUSG00000039714	Cplx3	protein_coding	MGI Symbol	3	complexin 3 [Source:MGI Symbol;Acc:MGI:2384571]	0.296803	2.27507	1.44139	0.155341	0.999227	-5.22356
ENSMUSG00000074807	Gm10762	antisense	MGI Symbol	2	predicted gene 10762 [Source:MGI Symbol;Acc:MGI:3704209]	0.321315	1.38602	1.27293	0.208581	0.999227	-5.22366
ENSMUSG00000117779	Gm19209	processed_pseudogene	MGI Symbol	1	predicted gene, 19209 [Source:MGI Symbol;Acc:MGI:5011394]	-0.245697	0.311311	-1.14601	0.256925	0.999227	-5.22367
ENSMUSG00000054519	Zfp867	protein_coding	MGI Symbol	1	zinc finger protein 867 [Source:MGI Symbol;Acc:MGI:2681848]	-0.170614	3.50427	-1.62772	0.109499	0.999227	-5.22397
ENSMUSG00000085039	Gm15927	processed_transcript	MGI Symbol	5	predicted gene 15927 [Source:MGI Symbol;Acc:MGI:3801889]	-0.312907	0.152209	-1.08137	0.284415	0.999227	-5.22398
ENSMUSG00000118504	4933434E20Rik	protein_coding	MGI Symbol	2	RIKEN cDNA 4933434E20 gene [Source:MGI Symbol;Acc:MGI:1914027]	0.255526	1.08659	1.20101	0.235071	0.999227	-5.22494
ENSMUSG00000117406	Ntn3	protein_coding	MGI Symbol	4	netrin 3 [Source:MGI Symbol;Acc:MGI:1341188]	-0.40389	0.413403	-1.15501	0.253254	0.999227	-5.22515
ENSMUSG00000009772	Nuak2	protein_coding	MGI Symbol	4	NUAK family, SNF1-like kinase, 2 [Source:MGI Symbol;Acc:MGI:1921387]	-0.40166	0.552734	-1.19081	0.23902	0.999227	-5.22526
ENSMUSG00000057246	BC051142	protein_coding	MGI Symbol	13	cDNA sequence BC051142 [Source:MGI Symbol;Acc:MGI:3039565]	-0.333703	0.143959	-1.11217	0.271071	0.999227	-5.22546
ENSMUSG00000100680	1810044D09Rik	lincRNA	MGI Symbol	1	RIKEN cDNA 1810044D09 gene [Source:MGI Symbol;Acc:MGI:1917048]	-0.297166	0.299777	-1.10847	0.272648	0.999227	-5.22575
ENSMUSG00000024037	Wdr4	protein_coding	MGI Symbol	14	WD repeat domain 4 [Source:MGI Symbol;Acc:MGI:1889002]	0.169818	4.45298	1.71047	0.0930097	0.999227	-5.22633
ENSMUSG00000039395	Mreg	protein_coding	MGI Symbol	1	melanoregulin [Source:MGI Symbol;Acc:MGI:2151839]	-0.309277	1.64355	-1.38901	0.17062	0.999227	-5.22773
ENSMUSG00000097047	1110020A21Rik	bidirectional_promoter_lncRNA	MGI Symbol	3	RIKEN cDNA 1110020A21 gene [Source:MGI Symbol;Acc:MGI:1915781]	0.330244	0.518625	1.08847	0.281296	0.999227	-5.22791
ENSMUSG00000032942	Ucp3	protein_coding	MGI Symbol	4	uncoupling protein 3 (mitochondrial, proton carrier) [Source:MGI Symbol;Acc:MGI:1099787]	0.305956	1.37534	1.25827	0.213792	0.999227	-5.22877
ENSMUSG00000096255	Dynlt1b	protein_coding	MGI Symbol	1	dynein light chain Tctex-type 1B [Source:MGI Symbol;Acc:MGI:98643]	-0.307506	1.61187	-1.37414	0.175165	0.999227	-5.22888
ENSMUSG00000097321	1700028E10Rik	processed_transcript	MGI Symbol	6	RIKEN cDNA 1700028E10 gene [Source:MGI Symbol;Acc:MGI:1916713]	0.450192	-0.0258058	0.978505	0.332257	0.999227	-5.22898
ENSMUSG00000010064	Slc38a3	protein_coding	MGI Symbol	14	solute carrier family 38, member 3 [Source:MGI Symbol;Acc:MGI:1923507]	-0.290364	4.34627	-1.72734	0.089913	0.999227	-5.229
ENSMUSG00000030376	Slc8a2	protein_coding	MGI Symbol	2	solute carrier family 8 (sodium/calcium exchanger), member 2 [Source:MGI Symbol;Acc:MGI:107996]	-0.273865	4.06846	-1.69641	0.0956577	0.999227	-5.22951
ENSMUSG00000082585	Gm15387	processed_pseudogene	MGI Symbol	1	predicted gene 15387 [Source:MGI Symbol;Acc:MGI:3705374]	0.234601	0.0911845	1.02951	0.3079	0.999227	-5.23036
ENSMUSG00000050677	Ccdc96	protein_coding	MGI Symbol	1	coiled-coil domain containing 96 [Source:MGI Symbol;Acc:MGI:1913967]	-0.273145	1.10214	-1.29417	0.201202	0.999227	-5.23175
ENSMUSG00000097288	Gm2155	antisense	MGI Symbol	1	predicted gene 2155 [Source:MGI Symbol;Acc:MGI:3780324]	-0.266659	0.325989	-1.16137	0.250681	0.999227	-5.23185
ENSMUSG00000103957	Gm10766	TEC	MGI Symbol	2	predicted gene 10766 [Source:MGI Symbol;Acc:MGI:3642134]	0.33587	0.281833	1.05711	0.29524	0.999227	-5.23252
ENSMUSG00000090610	Gm3571	processed_pseudogene	MGI Symbol	1	predicted gene 3571 [Source:MGI Symbol;Acc:MGI:3781748]	0.275406	2.24711	1.3952	0.168757	0.999227	-5.23388
ENSMUSG00000050063	Klk6	protein_coding	MGI Symbol	4	kallikrein related-peptidase 6 [Source:MGI Symbol;Acc:MGI:1343166]	-0.563324	0.19953	-1.10218	0.275347	0.999227	-5.23412
ENSMUSG00000046415	B430212C06Rik	processed_transcript	MGI Symbol	5	RIKEN cDNA B430212C06 gene [Source:MGI Symbol;Acc:MGI:2442134]	0.291028	0.829041	1.15449	0.253461	0.999227	-5.23436
ENSMUSG00000029534	St7	protein_coding	MGI Symbol	21	suppression of tumorigenicity 7 [Source:MGI Symbol;Acc:MGI:1927450]	-0.182911	4.00137	-1.67589	0.0996316	0.999227	-5.23451
ENSMUSG00000044952	Kctd21	protein_coding	MGI Symbol	1	potassium channel tetramerisation domain containing 21 [Source:MGI Symbol;Acc:MGI:3643121]	0.187983	3.91016	1.64276	0.106336	0.999227	-5.23451
ENSMUSG00000035172	Plekhh3	protein_coding	MGI Symbol	6	pleckstrin homology domain containing, family H (with MyTH4 domain) member 3 [Source:MGI Symbol;Acc:MGI:2384950]	0.298231	0.00842729	1.01457	0.314908	0.999227	-5.23454
ENSMUSG00000048450	Msx1	protein_coding	MGI Symbol	2	msh homeobox 1 [Source:MGI Symbol;Acc:MGI:97168]	-0.590675	2.30751	-1.51506	0.135682	0.999227	-5.23565
ENSMUSG00000040462	Os9	protein_coding	MGI Symbol	3	amplified in osteosarcoma [Source:MGI Symbol;Acc:MGI:1924301]	-0.199828	6.39111	-1.83699	0.0718044	0.999227	-5.23581
ENSMUSG00000044519	Zfp488	protein_coding	MGI Symbol	1	zinc finger protein 488 [Source:MGI Symbol;Acc:MGI:2686052]	0.260497	0.861986	1.16671	0.248533	0.999227	-5.23583
ENSMUSG00000035239	Neu3	protein_coding	MGI Symbol	1	neuraminidase 3 [Source:MGI Symbol;Acc:MGI:1355305]	0.269296	1.5292	1.29158	0.202092	0.999227	-5.23739
ENSMUSG00000053914	Kdm4d	protein_coding	MGI Symbol	2	lysine (K)-specific demethylase 4D [Source:MGI Symbol;Acc:MGI:3606484]	-0.337721	0.519466	-1.18713	0.240455	0.999227	-5.23749
ENSMUSG00000037017	Zscan21	protein_coding	MGI Symbol	7	zinc finger and SCAN domain containing 21 [Source:MGI Symbol;Acc:MGI:99182]	0.184297	4.61614	1.71054	0.0929972	0.999227	-5.23763
ENSMUSG00000037686	Aspg	protein_coding	MGI Symbol	8	asparaginase [Source:MGI Symbol;Acc:MGI:2144822]	-0.356614	-0.0526965	-1.03874	0.303626	0.999227	-5.23794
ENSMUSG00000067147	Rpl7a-ps11	processed_pseudogene	MGI Symbol	1	ribosomal protein L7A, pseudogene 11 [Source:MGI Symbol;Acc:MGI:3644020]	0.296549	1.62915	1.31054	0.195648	0.999227	-5.23893
ENSMUSG00000102559	Gm37570	TEC	MGI Symbol	1	predicted gene, 37570 [Source:MGI Symbol;Acc:MGI:5610798]	-0.345576	0.145711	-1.08204	0.28412	0.999227	-5.23916
ENSMUSG00000113606	Gm47441	processed_pseudogene	MGI Symbol	1	predicted gene, 47441 [Source:MGI Symbol;Acc:MGI:6096395]	-0.309915	0.0119867	-1.09209	0.279717	0.999227	-5.23919
ENSMUSG00000039632	Ccdc151	protein_coding	MGI Symbol	3	coiled-coil domain containing 151 [Source:MGI Symbol;Acc:MGI:1924859]	0.247267	1.98446	1.37967	0.173465	0.999227	-5.23921
ENSMUSG00000036585	Fgf1	protein_coding	MGI Symbol	11	fibroblast growth factor 1 [Source:MGI Symbol;Acc:MGI:95515]	0.21011	4.94899	1.73738	0.0881122	0.999227	-5.24078
ENSMUSG00000097603	A430010J10Rik	processed_transcript	MGI Symbol	4	RIKEN cDNA A430010J10 gene [Source:MGI Symbol;Acc:MGI:2442501]	0.291924	-0.0565449	0.955879	0.34346	0.999227	-5.24102
ENSMUSG00000041654	Slc39a11	protein_coding	MGI Symbol	8	solute carrier family 39 (metal ion transporter), member 11 [Source:MGI Symbol;Acc:MGI:1917056]	-0.22783	3.84218	-1.6665	0.101496	0.999227	-5.24146
ENSMUSG00000020717	Pecam1	protein_coding	MGI Symbol	8	platelet/endothelial cell adhesion molecule 1 [Source:MGI Symbol;Acc:MGI:97537]	-0.345691	1.06957	-1.27573	0.207597	0.999227	-5.24183
ENSMUSG00000102326	Gm37788	TEC	MGI Symbol	1	predicted gene, 37788 [Source:MGI Symbol;Acc:MGI:5611016]	0.401247	-0.7581	0.798363	0.428213	0.999227	-5.24223
ENSMUSG00000051910	Sox6	protein_coding	MGI Symbol	16	SRY (sex determining region Y)-box 6 [Source:MGI Symbol;Acc:MGI:98368]	0.203008	3.39141	1.56917	0.122543	0.999227	-5.24239
ENSMUSG00000081888	Spcs2-ps	unprocessed_pseudogene	MGI Symbol	1	signal peptidase complex subunit 2, pseudogene [Source:MGI Symbol;Acc:MGI:3650451]	-0.289296	0.157936	-1.09016	0.28056	0.999227	-5.24338
ENSMUSG00000037973	Itprid1	protein_coding	MGI Symbol	2	ITPR interacting domain containing 1 [Source:MGI Symbol;Acc:MGI:2685304]	-0.371375	0.151019	-1.05803	0.294825	0.999227	-5.24346
ENSMUSG00000070034	Sp110	protein_coding	MGI Symbol	9	Sp110 nuclear body protein [Source:MGI Symbol;Acc:MGI:1923364]	0.346864	-0.392637	0.877149	0.384353	0.999227	-5.24373
ENSMUSG00000011884	Gltp	protein_coding	MGI Symbol	3	glycolipid transfer protein [Source:MGI Symbol;Acc:MGI:1929253]	-0.222169	6.02018	-1.82342	0.0738642	0.999227	-5.2442
ENSMUSG00000038323	1700066M21Rik	protein_coding	MGI Symbol	3	RIKEN cDNA 1700066M21 gene [Source:MGI Symbol;Acc:MGI:1920717]	-0.176023	3.86556	-1.66235	0.102328	0.999227	-5.2453
ENSMUSG00000044216	Kcnj4	protein_coding	MGI Symbol	1	potassium inwardly-rectifying channel, subfamily J, member 4 [Source:MGI Symbol;Acc:MGI:104743]	-0.276824	3.57366	-1.64426	0.106024	0.999227	-5.24538
ENSMUSG00000047330	Kcne4	protein_coding	MGI Symbol	2	potassium voltage-gated channel, Isk-related subfamily, gene 4 [Source:MGI Symbol;Acc:MGI:1891125]	-0.395814	-0.320564	-0.996579	0.323484	0.999227	-5.24544
ENSMUSG00000055048	Gm9962	antisense	MGI Symbol	2	predicted gene 9962 [Source:MGI Symbol;Acc:MGI:3642695]	0.2534	0.46288	1.07976	0.285125	0.999227	-5.24571
ENSMUSG00000024513	Mbd2	protein_coding	MGI Symbol	5	methyl-CpG binding domain protein 2 [Source:MGI Symbol;Acc:MGI:1333813]	-0.197348	3.68714	-1.63955	0.107004	0.999227	-5.24621
ENSMUSG00000026611	Spata17	protein_coding	MGI Symbol	8	spermatogenesis associated 17 [Source:MGI Symbol;Acc:MGI:1921967]	0.34386	-0.222337	0.920993	0.361215	0.999227	-5.2465
ENSMUSG00000038522	Mfsd4b1	protein_coding	MGI Symbol	3	major facilitator superfamily domain containing 4B1 [Source:MGI Symbol;Acc:MGI:2143575]	0.418866	-0.536178	0.859036	0.394178	0.999227	-5.24656
ENSMUSG00000097750	Gm4673	antisense	MGI Symbol	2	predicted gene 4673 [Source:MGI Symbol;Acc:MGI:3782854]	-0.440709	-0.386562	-1.01322	0.315546	0.999227	-5.247
ENSMUSG00000020519	Sap30l	protein_coding	MGI Symbol	1	SAP30-like [Source:MGI Symbol;Acc:MGI:1354709]	-0.229848	2.08967	-1.4342	0.157371	0.999227	-5.24708
ENSMUSG00000000409	Lck	protein_coding	MGI Symbol	8	lymphocyte protein tyrosine kinase [Source:MGI Symbol;Acc:MGI:96756]	-0.272073	1.32354	-1.31722	0.193415	0.999227	-5.24722
ENSMUSG00000080877	Rpl22-ps1	processed_pseudogene	MGI Symbol	1	ribosomal protein L22, pseudogene 1 [Source:MGI Symbol;Acc:MGI:3644276]	-0.274349	1.33761	-1.32575	0.190592	0.999227	-5.24732
ENSMUSG00000029661	Col1a2	protein_coding	MGI Symbol	8	collagen, type I, alpha 2 [Source:MGI Symbol;Acc:MGI:88468]	-0.556858	1.61131	-1.36305	0.178613	0.999227	-5.24792
ENSMUSG00000041741	Pde3a	protein_coding	MGI Symbol	2	phosphodiesterase 3A, cGMP inhibited [Source:MGI Symbol;Acc:MGI:1860764]	-0.317123	0.942214	-1.22262	0.226866	0.999227	-5.24885
ENSMUSG00000027312	Atrn	protein_coding	MGI Symbol	5	attractin [Source:MGI Symbol;Acc:MGI:1341628]	-0.243976	5.75126	-1.80714	0.0764012	0.999227	-5.24888
ENSMUSG00000026121	Sema4c	protein_coding	MGI Symbol	8	sema domain, immunoglobulin domain (Ig), transmembrane domain (TM) and short cytoplasmic domain, (semaphorin) 4C [Source:MGI Symbol;Acc:MGI:109252]	-0.295212	1.06088	-1.26444	0.211586	0.999227	-5.24901
ENSMUSG00000040918	Slc19a2	protein_coding	MGI Symbol	4	solute carrier family 19 (thiamine transporter), member 2 [Source:MGI Symbol;Acc:MGI:1928761]	-0.240121	2.61511	-1.48999	0.142136	0.999227	-5.24941
ENSMUSG00000106386	Gm42991	TEC	MGI Symbol	1	predicted gene 42991 [Source:MGI Symbol;Acc:MGI:5663128]	0.437957	-0.353537	0.862493	0.392291	0.999227	-5.24944
ENSMUSG00000037813	D630003M21Rik	protein_coding	MGI Symbol	3	RIKEN cDNA D630003M21 gene [Source:MGI Symbol;Acc:MGI:3606579]	0.248381	1.17935	1.21223	0.230784	0.999227	-5.24955
ENSMUSG00000057858	Fam204a	protein_coding	MGI Symbol	7	family with sequence similarity 204, member A [Source:MGI Symbol;Acc:MGI:1289174]	-0.202747	4.48707	-1.7291	0.0895962	0.999227	-5.24984
ENSMUSG00000109529	Gm44801	TEC	MGI Symbol	1	predicted gene 44801 [Source:MGI Symbol;Acc:MGI:5753377]	0.459892	-1.21889	0.605424	0.547473	0.999227	-5.24998
ENSMUSG00000080839	Gm11625	processed_pseudogene	MGI Symbol	1	predicted gene 11625 [Source:MGI Symbol;Acc:MGI:3650862]	0.237238	0.470402	1.05244	0.29736	0.999227	-5.25033
ENSMUSG00000054517	Trim65	protein_coding	MGI Symbol	3	tripartite motif-containing 65 [Source:MGI Symbol;Acc:MGI:2442815]	-0.216488	2.15833	-1.44016	0.155687	0.999227	-5.25144
ENSMUSG00000051242	Pcdhb9	protein_coding	MGI Symbol	1	protocadherin beta 9 [Source:MGI Symbol;Acc:MGI:2136744]	-0.270322	3.19788	-1.58288	0.119382	0.999227	-5.25171
ENSMUSG00000070520	Nsmce3	protein_coding	MGI Symbol	1	NSE3 homolog, SMC5-SMC6 complex component [Source:MGI Symbol;Acc:MGI:1913897]	-0.412677	4.2087	-1.71036	0.0930305	0.999227	-5.25251
ENSMUSG00000035459	Stab2	protein_coding	MGI Symbol	7	stabilin 2 [Source:MGI Symbol;Acc:MGI:2178743]	0.308793	0.571666	1.07594	0.286814	0.999227	-5.25299
ENSMUSG00000081070	Gm13181	processed_pseudogene	MGI Symbol	1	predicted gene 13181 [Source:MGI Symbol;Acc:MGI:3650464]	-0.30213	-0.0665745	-1.041	0.302589	0.999227	-5.25327
ENSMUSG00000110195	Pde2a	protein_coding	MGI Symbol	12	phosphodiesterase 2A, cGMP-stimulated [Source:MGI Symbol;Acc:MGI:2446107]	0.310203	0.0767315	0.986981	0.328123	0.999227	-5.25363
ENSMUSG00000107815	Gm44257	lincRNA	MGI Symbol	1	predicted gene, 44257 [Source:MGI Symbol;Acc:MGI:5690649]	0.242336	1.95136	1.35238	0.18198	0.999227	-5.25372
ENSMUSG00000071847	Apcdd1	protein_coding	MGI Symbol	5	adenomatosis polyposis coli down-regulated 1 [Source:MGI Symbol;Acc:MGI:3513977]	-0.236303	2.86583	-1.54764	0.127642	0.999227	-5.25382
ENSMUSG00000031534	Smim19	protein_coding	MGI Symbol	2	small integral membrane protein 19 [Source:MGI Symbol;Acc:MGI:2142501]	-0.20965	3.56363	-1.61798	0.111587	0.999227	-5.25393
ENSMUSG00000111465	Gm47113	lincRNA	MGI Symbol	1	predicted gene, 47113 [Source:MGI Symbol;Acc:MGI:6095855]	-0.364213	-0.425136	-0.937784	0.352597	0.999227	-5.25394
ENSMUSG00000047507	Baiap3	protein_coding	MGI Symbol	9	BAI1-associated protein 3 [Source:MGI Symbol;Acc:MGI:2685783]	-0.458662	0.293293	-1.11364	0.270443	0.999227	-5.25432
ENSMUSG00000059647	Cbx3-ps7	processed_pseudogene	MGI Symbol	1	chromobox 3, pseudogene 7 [Source:MGI Symbol;Acc:MGI:3704187]	-0.28183	-0.171243	-1.01839	0.313107	0.999227	-5.25436
ENSMUSG00000024347	Psd2	protein_coding	MGI Symbol	6	pleckstrin and Sec7 domain containing 2 [Source:MGI Symbol;Acc:MGI:1921252]	0.169353	4.26981	1.66783	0.10123	0.999227	-5.25482
ENSMUSG00000000861	Bcl11a	protein_coding	MGI Symbol	6	B cell CLL/lymphoma 11A (zinc finger protein) [Source:MGI Symbol;Acc:MGI:106190]	-0.252131	7.12081	-1.84195	0.0710632	0.999227	-5.25505
ENSMUSG00000002870	Mcm2	protein_coding	MGI Symbol	7	minichromosome maintenance complex component 2 [Source:MGI Symbol;Acc:MGI:105380]	0.214567	2.20472	1.39621	0.168454	0.999227	-5.25518
ENSMUSG00000083200	Gm15066	processed_pseudogene	MGI Symbol	1	predicted gene 15066 [Source:MGI Symbol;Acc:MGI:3706256]	0.308017	1.13209	1.19024	0.239241	0.999227	-5.25534
ENSMUSG00000039954	Stk32a	protein_coding	MGI Symbol	4	serine/threonine kinase 32A [Source:MGI Symbol;Acc:MGI:2442403]	0.324099	1.85166	1.33233	0.188435	0.999227	-5.25583
ENSMUSG00000087006	Gm13889	protein_coding	MGI Symbol	2	predicted gene 13889 [Source:MGI Symbol;Acc:MGI:3652053]	-0.222237	3.41542	-1.61297	0.112672	0.999227	-5.25618
ENSMUSG00000041731	Pgm5	protein_coding	MGI Symbol	4	phosphoglucomutase 5 [Source:MGI Symbol;Acc:MGI:1925668]	-0.25587	-0.186123	-1.00084	0.321438	0.999227	-5.25657
ENSMUSG00000024650	Slc22a6	protein_coding	MGI Symbol	1	solute carrier family 22 (organic anion transporter), member 6 [Source:MGI Symbol;Acc:MGI:892001]	-0.509048	0.535322	-1.17727	0.244331	0.999227	-5.25671
ENSMUSG00000002365	Snx9	protein_coding	MGI Symbol	2	sorting nexin 9 [Source:MGI Symbol;Acc:MGI:1913866]	-0.191606	2.90813	-1.53957	0.129597	0.999227	-5.25675
ENSMUSG00000039851	4932438H23Rik	protein_coding	MGI Symbol	3	RIKEN cDNA 4932438H23 gene [Source:MGI Symbol;Acc:MGI:1921637]	-0.300315	-0.314256	-0.955122	0.34384	0.999227	-5.25714
ENSMUSG00000022701	Ccdc191	protein_coding	MGI Symbol	6	coiled-coil domain containing 191 [Source:MGI Symbol;Acc:MGI:1922661]	0.216568	2.96512	1.49765	0.140139	0.999227	-5.25728
ENSMUSG00000020902	Ntn1	protein_coding	MGI Symbol	3	netrin 1 [Source:MGI Symbol;Acc:MGI:105088]	-0.255115	0.791395	-1.18433	0.241549	0.999227	-5.25753
ENSMUSG00000016510	Mtif3	protein_coding	MGI Symbol	6	mitochondrial translational initiation factor 3 [Source:MGI Symbol;Acc:MGI:1923616]	0.150758	4.50402	1.69097	0.0966988	0.999227	-5.25757
ENSMUSG00000045039	Megf8	protein_coding	MGI Symbol	2	multiple EGF-like-domains 8 [Source:MGI Symbol;Acc:MGI:2446294]	-0.265956	4.71604	-1.73756	0.08808	0.999227	-5.25776
ENSMUSG00000070532	Ccdc190	protein_coding	MGI Symbol	2	coiled-coil domain containing 190 [Source:MGI Symbol;Acc:MGI:1925715]	-0.237562	0.0841642	-1.04192	0.302163	0.999227	-5.25782
ENSMUSG00000025169	Ogfod3	protein_coding	MGI Symbol	1	2-oxoglutarate and iron-dependent oxygenase domain containing 3 [Source:MGI Symbol;Acc:MGI:1913429]	-0.164435	2.32944	-1.45594	0.151291	0.999227	-5.25839
ENSMUSG00000086902	Gm11728	lincRNA	MGI Symbol	2	predicted gene 11728 [Source:MGI Symbol;Acc:MGI:3650943]	0.327488	0.541007	1.08587	0.282436	0.999227	-5.25844
ENSMUSG00000098050	Gm5345	processed_pseudogene	MGI Symbol	1	predicted gene 5345 [Source:MGI Symbol;Acc:MGI:3644320]	0.287943	-0.0882231	0.912388	0.365684	0.999227	-5.25845
ENSMUSG00000053552	Ebf4	protein_coding	MGI Symbol	6	early B cell factor 4 [Source:MGI Symbol;Acc:MGI:2385972]	-0.327432	0.844629	-1.21082	0.231321	0.999227	-5.2585
ENSMUSG00000085129	5031425F14Rik	lincRNA	MGI Symbol	1	RIKEN cDNA 5031425F14 gene [Source:MGI Symbol;Acc:MGI:2442533]	0.3113	-0.242504	0.903626	0.370271	0.999227	-5.25854
ENSMUSG00000028782	Adgrb2	protein_coding	MGI Symbol	13	adhesion G protein-coupled receptor B2 [Source:MGI Symbol;Acc:MGI:2451244]	-0.278246	5.27761	-1.78228	0.0804157	0.999227	-5.26022
ENSMUSG00000044628	Rnf208	protein_coding	MGI Symbol	2	ring finger protein 208 [Source:MGI Symbol;Acc:MGI:1916096]	-0.149108	7.053	-1.83705	0.0717955	0.999227	-5.2604
ENSMUSG00000070002	Ell	protein_coding	MGI Symbol	2	elongation factor RNA polymerase II [Source:MGI Symbol;Acc:MGI:109377]	0.178625	4.98082	1.73156	0.0891517	0.999227	-5.26123
ENSMUSG00000090173	Fbxw10	protein_coding	MGI Symbol	6	F-box and WD-40 domain protein 10 [Source:MGI Symbol;Acc:MGI:3052463]	0.389488	-0.343582	0.881336	0.382103	0.999227	-5.26128
ENSMUSG00000070471	Erich6	protein_coding	MGI Symbol	1	glutamate rich 6 [Source:MGI Symbol;Acc:MGI:3588212]	-0.282971	-0.0223601	-1.04152	0.302348	0.999227	-5.26192
ENSMUSG00000032051	Fdx1	protein_coding	MGI Symbol	3	ferredoxin 1 [Source:MGI Symbol;Acc:MGI:103224]	-0.323538	3.02907	-1.56245	0.124116	0.999227	-5.26241
ENSMUSG00000106454	Gm17775	processed_pseudogene	MGI Symbol	1	predicted gene, 17775 [Source:MGI Symbol;Acc:MGI:5009939]	-0.283268	0.0215334	-1.0442	0.30112	0.999227	-5.26266
ENSMUSG00000024039	Cbs	protein_coding	MGI Symbol	12	cystathionine beta-synthase [Source:MGI Symbol;Acc:MGI:88285]	0.208927	4.92691	1.72337	0.0906336	0.999227	-5.26266
ENSMUSG00000096696	Zfp960	protein_coding	MGI Symbol	1	zinc finger protein 960 [Source:MGI Symbol;Acc:MGI:3052731]	-0.233281	1.67651	-1.36139	0.179134	0.999227	-5.26289
ENSMUSG00000087022	9130024F11Rik	processed_transcript	MGI Symbol	5	RIKEN cDNA 9130024F11 gene [Source:MGI Symbol;Acc:MGI:1926150]	-0.224168	2.90873	-1.54514	0.128246	0.999227	-5.26301
ENSMUSG00000062116	Zfp954	protein_coding	MGI Symbol	2	zinc finger protein 954 [Source:MGI Symbol;Acc:MGI:1917764]	0.174669	4.56368	1.69458	0.0960071	0.999227	-5.2649
ENSMUSG00000111602	Gm32014	lincRNA	MGI Symbol	2	predicted gene, 32014 [Source:MGI Symbol;Acc:MGI:5591173]	0.292216	-0.556773	0.748174	0.457652	0.999227	-5.26519
ENSMUSG00000011305	Plin5	protein_coding	MGI Symbol	2	perilipin 5 [Source:MGI Symbol;Acc:MGI:1914218]	0.35215	0.0181953	0.929919	0.356617	0.999227	-5.26526
ENSMUSG00000034923	Ly6g6f	protein_coding	MGI Symbol	1	lymphocyte antigen 6 complex, locus G6F [Source:MGI Symbol;Acc:MGI:3616082]	-0.33376	0.367429	-1.11486	0.269924	0.999227	-5.26565
ENSMUSG00000038406	Scaf1	protein_coding	MGI Symbol	6	SR-related CTD-associated factor 1 [Source:MGI Symbol;Acc:MGI:2141980]	-0.227976	5.37685	-1.782	0.0804614	0.999227	-5.26586
ENSMUSG00000062861	Zfp28	protein_coding	MGI Symbol	6	zinc finger protein 28 [Source:MGI Symbol;Acc:MGI:99175]	-0.200654	2.75004	-1.51846	0.134824	0.999227	-5.26621
ENSMUSG00000020810	Cygb	protein_coding	MGI Symbol	1	cytoglobin [Source:MGI Symbol;Acc:MGI:2149481]	-0.173442	6.5313	-1.82519	0.073593	0.999227	-5.26679
ENSMUSG00000079137	Rpl27-ps1	processed_pseudogene	MGI Symbol	1	ribosomal protein L27, pseudogene 1 [Source:MGI Symbol;Acc:MGI:3645348]	0.226024	0.710433	1.13247	0.262521	0.999227	-5.26728
ENSMUSG00000080768	Gm12219	processed_pseudogene	MGI Symbol	1	predicted gene 12219 [Source:MGI Symbol;Acc:MGI:3649338]	0.26257	0.33661	1.04386	0.301272	0.999227	-5.26753
ENSMUSG00000002980	Bcam	protein_coding	MGI Symbol	5	basal cell adhesion molecule [Source:MGI Symbol;Acc:MGI:1929940]	-0.358733	0.439072	-1.16182	0.2505	0.999227	-5.26755
ENSMUSG00000066760	Psg16	protein_coding	MGI Symbol	4	pregnancy specific glycoprotein 16 [Source:MGI Symbol;Acc:MGI:1347249]	0.28442	0.614223	1.08765	0.281655	0.999227	-5.26782
ENSMUSG00000062309	Rpp25	protein_coding	MGI Symbol	1	ribonuclease P/MRP 25 subunit [Source:MGI Symbol;Acc:MGI:2143151]	-0.325914	3.99622	-1.68153	0.0985266	0.999227	-5.26985
ENSMUSG00000019188	H13	protein_coding	MGI Symbol	6	histocompatibility 13 [Source:MGI Symbol;Acc:MGI:95886]	-0.423917	4.03628	-1.68142	0.0985482	0.999227	-5.27053
ENSMUSG00000104585	4921511C10Rik	antisense	MGI Symbol	1	RIKEN cDNA 4921511C10 gene [Source:MGI Symbol;Acc:MGI:1918174]	0.379353	-0.515818	0.771465	0.443847	0.999227	-5.2712
ENSMUSG00000025888	Casp1	protein_coding	MGI Symbol	5	caspase 1 [Source:MGI Symbol;Acc:MGI:96544]	-0.320532	0.563289	-1.13821	0.260138	0.999227	-5.27136
ENSMUSG00000026034	Clk1	protein_coding	MGI Symbol	13	CDC-like kinase 1 [Source:MGI Symbol;Acc:MGI:107403]	0.307983	5.5355	1.76096	0.0839971	0.999227	-5.27152
ENSMUSG00000066235	Pomgnt2	protein_coding	MGI Symbol	7	protein O-linked mannose beta 1,4-N-acetylglucosaminyltransferase 2 [Source:MGI Symbol;Acc:MGI:2143424]	-0.189449	4.19327	-1.66864	0.101069	0.999227	-5.27243
ENSMUSG00000034906	Ncaph	protein_coding	MGI Symbol	6	non-SMC condensin I complex, subunit H [Source:MGI Symbol;Acc:MGI:2444777]	0.37139	0.168864	0.948696	0.347068	0.999227	-5.27263
ENSMUSG00000041112	Elmo1	protein_coding	MGI Symbol	7	engulfment and cell motility 1 [Source:MGI Symbol;Acc:MGI:2153044]	0.1689	5.85846	1.78323	0.0802584	0.999227	-5.27315
ENSMUSG00000109387	Gm45182	TEC	MGI Symbol	1	predicted gene 45182 [Source:MGI Symbol;Acc:MGI:5753758]	0.432122	0.0626384	0.879916	0.382866	0.999227	-5.2733
ENSMUSG00000026223	Itm2c	protein_coding	MGI Symbol	3	integral membrane protein 2C [Source:MGI Symbol;Acc:MGI:1927594]	-0.235154	9.21895	-1.85381	0.0693192	0.999227	-5.27367
ENSMUSG00000006675	P4htm	protein_coding	MGI Symbol	6	prolyl 4-hydroxylase, transmembrane (endoplasmic reticulum) [Source:MGI Symbol;Acc:MGI:1921693]	-0.172796	6.31271	-1.81329	0.0754336	0.999227	-5.27371
ENSMUSG00000067869	Tcea1-ps1	processed_pseudogene	MGI Symbol	1	transcription elongation factor A (SII) 1, pseudogene 1 [Source:MGI Symbol;Acc:MGI:1861432]	-0.223803	2.12712	-1.42019	0.16139	0.999227	-5.27377
ENSMUSG00000070972	Dnajc25	protein_coding	MGI Symbol	5	DnaJ heat shock protein family (Hsp40) member C25 [Source:MGI Symbol;Acc:MGI:1919679]	0.24623	0.771479	1.11033	0.271856	0.999227	-5.27387
ENSMUSG00000054000	Tusc1	protein_coding	MGI Symbol	1	tumor suppressor candidate 1 [Source:MGI Symbol;Acc:MGI:2684283]	-0.24808	0.86268	-1.20771	0.232503	0.999227	-5.27393
ENSMUSG00000026748	Plxdc2	protein_coding	MGI Symbol	4	plexin domain containing 2 [Source:MGI Symbol;Acc:MGI:1914698]	-0.23757	4.29781	-1.68845	0.0971844	0.999227	-5.27396
ENSMUSG00000097204	Gm17690	antisense	MGI Symbol	2	predicted gene, 17690 [Source:MGI Symbol;Acc:MGI:4937324]	0.281609	0.040039	0.98038	0.33134	0.999227	-5.27401
ENSMUSG00000085028	Slc2a4rg-ps	transcribed_unitary_pseudogene	MGI Symbol	2	Slc2a4 regulator, pseudogene [Source:MGI Symbol;Acc:MGI:3651388]	0.427828	1.07478	1.15144	0.254704	0.999227	-5.27435
ENSMUSG00000110569	Gm18860	processed_pseudogene	MGI Symbol	1	predicted gene, 18860 [Source:MGI Symbol;Acc:MGI:5011045]	0.259589	0.630777	1.08939	0.280895	0.999227	-5.27478
ENSMUSG00000026167	Wnt10a	protein_coding	MGI Symbol	2	wingless-type MMTV integration site family, member 10A [Source:MGI Symbol;Acc:MGI:108071]	-0.590189	0.202909	-1.11617	0.269371	0.999227	-5.27568
ENSMUSG00000082715	Gm11633	processed_pseudogene	MGI Symbol	1	predicted gene 11633 [Source:MGI Symbol;Acc:MGI:3650676]	-0.514949	0.760552	-1.21546	0.229562	0.999227	-5.27585
ENSMUSG00000051627	H1f4	protein_coding	MGI Symbol	1	H1.4 linker histone, cluster member [Source:MGI Symbol;Acc:MGI:1931527]	-0.347717	2.51055	-1.48311	0.14395	0.999227	-5.2763
ENSMUSG00000085235	Gm12576	lincRNA	MGI Symbol	1	predicted gene 12576 [Source:MGI Symbol;Acc:MGI:3650616]	-0.363611	0.145177	-1.03193	0.306778	0.999227	-5.27646
ENSMUSG00000021747	4930452B06Rik	protein_coding	MGI Symbol	2	RIKEN cDNA 4930452B06 gene [Source:MGI Symbol;Acc:MGI:1926154]	0.277898	2.3395	1.39257	0.169547	0.999227	-5.27665
ENSMUSG00000023953	Polh	protein_coding	MGI Symbol	3	polymerase (DNA directed), eta (RAD 30 related) [Source:MGI Symbol;Acc:MGI:1891457]	0.325834	2.03755	1.34314	0.184932	0.999227	-5.27692
ENSMUSG00000050592	Fam78a	protein_coding	MGI Symbol	4	family with sequence similarity 78, member A [Source:MGI Symbol;Acc:MGI:2443569]	0.256475	1.65359	1.27325	0.208469	0.999227	-5.277
ENSMUSG00000051062	Fbll1	protein_coding	MGI Symbol	1	fibrillarin-like 1 [Source:MGI Symbol;Acc:MGI:3034689]	-0.218042	3.75746	-1.63344	0.108287	0.999227	-5.27709
ENSMUSG00000112030	Gm35189	lincRNA	MGI Symbol	1	predicted gene, 35189 [Source:MGI Symbol;Acc:MGI:5594348]	-0.330634	-0.443548	-0.905252	0.369417	0.999227	-5.2771
ENSMUSG00000102162	Gm2367	processed_pseudogene	MGI Symbol	1	predicted gene 2367 [Source:MGI Symbol;Acc:MGI:3780535]	-0.235586	-0.102726	-1.00602	0.318965	0.999227	-5.27757
ENSMUSG00000021461	Fancc	protein_coding	MGI Symbol	19	Fanconi anemia, complementation group C [Source:MGI Symbol;Acc:MGI:95480]	0.208214	2.88395	1.48168	0.14433	0.999227	-5.27766
ENSMUSG00000031209	Heph	protein_coding	MGI Symbol	5	hephaestin [Source:MGI Symbol;Acc:MGI:1332240]	-0.334733	0.381927	-1.0948	0.278538	0.999227	-5.27815
ENSMUSG00000075254	Heg1	protein_coding	MGI Symbol	8	heart development protein with EGF-like domains 1 [Source:MGI Symbol;Acc:MGI:1924696]	-0.201347	3.09979	-1.54356	0.128628	0.999227	-5.27835
ENSMUSG00000029862	Clcn1	protein_coding	MGI Symbol	11	chloride channel, voltage-sensitive 1 [Source:MGI Symbol;Acc:MGI:88417]	-0.392183	-0.737285	-0.888953	0.378034	0.999227	-5.2786
ENSMUSG00000110080	Gm6145	processed_transcript	MGI Symbol	7	predicted gene 6145 [Source:MGI Symbol;Acc:MGI:3779559]	0.220483	3.58379	1.57373	0.121485	0.999227	-5.27898
ENSMUSG00000054986	Sec14l3	protein_coding	MGI Symbol	5	SEC14-like lipid binding 3 [Source:MGI Symbol;Acc:MGI:3617848]	0.439667	-0.294059	0.815657	0.418336	0.999227	-5.2791
ENSMUSG00000041203	Trir	protein_coding	MGI Symbol	1	telomerase RNA component interacting RNase [Source:MGI Symbol;Acc:MGI:1922833]	-0.350207	4.54506	-1.72197	0.0908899	0.999227	-5.27915
ENSMUSG00000041390	Mdfic	protein_coding	MGI Symbol	7	MyoD family inhibitor domain containing [Source:MGI Symbol;Acc:MGI:104611]	-0.510602	-0.436571	-0.988418	0.327426	0.999227	-5.27933
ENSMUSG00000086477	Gm15506	transcribed_unitary_pseudogene	MGI Symbol	3	predicted gene 15506 [Source:MGI Symbol;Acc:MGI:3782954]	-0.218883	1.99046	-1.38922	0.170559	0.999227	-5.27936
ENSMUSG00000031297	Slc7a3	protein_coding	MGI Symbol	7	solute carrier family 7 (cationic amino acid transporter, y+ system), member 3 [Source:MGI Symbol;Acc:MGI:1100521]	-0.348116	0.836091	-1.30574	0.197265	0.999227	-5.27958
ENSMUSG00000032396	Dis3l	protein_coding	MGI Symbol	8	DIS3 like exosome 3prime-5prime exoribonuclease [Source:MGI Symbol;Acc:MGI:2143272]	0.148451	4.19319	1.64272	0.106345	0.999227	-5.28012
ENSMUSG00000043794	D830025C05Rik	antisense	MGI Symbol	2	RIKEN cDNA D830025C05 gene [Source:MGI Symbol;Acc:MGI:3698180]	-0.296273	-0.128318	-0.979875	0.331587	0.999227	-5.28025
ENSMUSG00000035355	Kcnh4	protein_coding	MGI Symbol	2	potassium voltage-gated channel, subfamily H (eag-related), member 4 [Source:MGI Symbol;Acc:MGI:2156184]	0.309061	-0.473369	0.824322	0.41344	0.999227	-5.28034
ENSMUSG00000075316	Scn9a	protein_coding	MGI Symbol	7	sodium channel, voltage-gated, type IX, alpha [Source:MGI Symbol;Acc:MGI:107636]	-0.266754	0.708243	-1.11965	0.267896	0.999227	-5.28096
ENSMUSG00000104103	Gm9517	processed_pseudogene	MGI Symbol	1	predicted gene 9517 [Source:MGI Symbol;Acc:MGI:3779430]	0.259008	0.842142	1.12263	0.266641	0.999227	-5.2811
ENSMUSG00000106010	Gm42616	TEC	MGI Symbol	1	predicted gene 42616 [Source:MGI Symbol;Acc:MGI:5662753]	0.425328	-0.630412	0.716633	0.476738	0.999227	-5.28111
ENSMUSG00000033318	Gstt2	protein_coding	MGI Symbol	8	glutathione S-transferase, theta 2 [Source:MGI Symbol;Acc:MGI:106188]	0.272483	1.42337	1.24007	0.220396	0.999227	-5.28112
ENSMUSG00000030148	Clec4a2	protein_coding	MGI Symbol	5	C-type lectin domain family 4, member a2 [Source:MGI Symbol;Acc:MGI:1349412]	-0.321118	-0.190422	-0.973872	0.334531	0.999227	-5.28191
ENSMUSG00000058626	Capn11	protein_coding	MGI Symbol	2	calpain 11 [Source:MGI Symbol;Acc:MGI:1352490]	0.552233	-0.656468	0.793825	0.430827	0.999227	-5.28239
ENSMUSG00000085282	Gm15663	processed_transcript	MGI Symbol	2	predicted gene 15663 [Source:MGI Symbol;Acc:MGI:3783105]	0.215664	2.40773	1.41805	0.162013	0.999227	-5.28254
ENSMUSG00000028950	Tas1r1	protein_coding	MGI Symbol	1	taste receptor, type 1, member 1 [Source:MGI Symbol;Acc:MGI:1927505]	-0.319547	0.0349936	-1.03663	0.3046	0.999227	-5.28266
ENSMUSG00000082456	Gm11598	processed_pseudogene	MGI Symbol	1	predicted gene 11598 [Source:MGI Symbol;Acc:MGI:3649374]	0.262403	2.3925	1.40377	0.166201	0.999227	-5.2828
ENSMUSG00000022952	Runx1	protein_coding	MGI Symbol	7	runt related transcription factor 1 [Source:MGI Symbol;Acc:MGI:99852]	-0.326462	-0.426947	-0.919447	0.362015	0.999227	-5.2831
ENSMUSG00000028688	Toe1	protein_coding	MGI Symbol	8	target of EGR1, member 1 (nuclear) [Source:MGI Symbol;Acc:MGI:1915526]	-0.147445	3.16531	-1.54565	0.128123	0.999227	-5.28348
ENSMUSG00000110751	C230053D17Rik	TEC	MGI Symbol	1	RIKEN cDNA C230053D17 gene [Source:MGI Symbol;Acc:MGI:2441895]	0.296461	2.07361	1.33815	0.186544	0.999227	-5.28418
ENSMUSG00000019731	Slc35e1	protein_coding	MGI Symbol	2	solute carrier family 35, member E1 [Source:MGI Symbol;Acc:MGI:2142403]	-0.203994	3.84977	-1.6304	0.108928	0.999227	-5.2843
ENSMUSG00000001018	Snapin	protein_coding	MGI Symbol	5	SNAP-associated protein [Source:MGI Symbol;Acc:MGI:1333745]	-0.152736	6.5008	-1.81179	0.0756687	0.999227	-5.28502
ENSMUSG00000039963	Ccdc40	protein_coding	MGI Symbol	8	coiled-coil domain containing 40 [Source:MGI Symbol;Acc:MGI:2443893]	0.23847	1.15091	1.18858	0.239887	0.999227	-5.28551
ENSMUSG00000022123	Scel	protein_coding	MGI Symbol	2	sciellin [Source:MGI Symbol;Acc:MGI:1891228]	-0.311201	-0.070387	-0.999397	0.32213	0.999227	-5.28576
ENSMUSG00000000339	Rtca	protein_coding	MGI Symbol	5	RNA 3prime-terminal phosphate cyclase [Source:MGI Symbol;Acc:MGI:1913618]	-0.147422	6.35218	-1.80837	0.0762071	0.999227	-5.28624
ENSMUSG00000034317	Trim59	protein_coding	MGI Symbol	4	tripartite motif-containing 59 [Source:MGI Symbol;Acc:MGI:1914199]	-0.277366	3.6366	-1.62153	0.110821	0.999227	-5.28632
ENSMUSG00000040751	Lat2	protein_coding	MGI Symbol	10	linker for activation of T cells family, member 2 [Source:MGI Symbol;Acc:MGI:1926479]	0.323401	-0.193979	0.825197	0.412948	0.999227	-5.28653
ENSMUSG00000082705	Gm15616	processed_pseudogene	MGI Symbol	1	predicted gene 15616 [Source:MGI Symbol;Acc:MGI:3783061]	0.247597	0.288199	1.03114	0.307145	0.999227	-5.28669
ENSMUSG00000094090	Gm8494	processed_pseudogene	MGI Symbol	1	predicted gene 8494 [Source:MGI Symbol;Acc:MGI:3645114]	0.239407	0.473156	1.03512	0.305298	0.999227	-5.28681
ENSMUSG00000112693	Gm5512	transcribed_unprocessed_pseudogene	MGI Symbol	2	predicted gene 5512 [Source:MGI Symbol;Acc:MGI:3645436]	0.231552	0.4973	1.05434	0.296497	0.999227	-5.28687
ENSMUSG00000032263	Bckdhb	protein_coding	MGI Symbol	6	branched chain ketoacid dehydrogenase E1, beta polypeptide [Source:MGI Symbol;Acc:MGI:88137]	-0.500746	4.15457	-1.69325	0.0962613	0.999227	-5.28742
ENSMUSG00000025366	Esyt1	protein_coding	MGI Symbol	5	extended synaptotagmin-like protein 1 [Source:MGI Symbol;Acc:MGI:1344426]	-0.245855	1.32615	-1.26302	0.212093	0.999227	-5.28873
ENSMUSG00000042549	Map2k3os	antisense	MGI Symbol	1	mitogen-activated protein kinase kinase 3, opposite strand [Source:MGI Symbol;Acc:MGI:1344334]	0.264157	1.02937	1.1489	0.255739	0.999227	-5.28932
ENSMUSG00000096935	1700113A16Rik	antisense	MGI Symbol	3	RIKEN cDNA 1700113A16 gene [Source:MGI Symbol;Acc:MGI:1923892]	0.280887	0.589314	1.06525	0.291576	0.999227	-5.28954
ENSMUSG00000048706	Lurap1l	protein_coding	MGI Symbol	1	leucine rich adaptor protein 1-like [Source:MGI Symbol;Acc:MGI:106510]	-0.256884	5.50302	-1.7757	0.0815071	0.999227	-5.2904
ENSMUSG00000024376	Epb41l4a	protein_coding	MGI Symbol	7	erythrocyte membrane protein band 4.1 like 4a [Source:MGI Symbol;Acc:MGI:103007]	-0.307055	1.55436	-1.29021	0.202563	0.999227	-5.29044
ENSMUSG00000087082	Gm15423	antisense	MGI Symbol	1	predicted gene 15423 [Source:MGI Symbol;Acc:MGI:3705184]	0.295352	0.273827	0.959827	0.341488	0.999227	-5.29078
ENSMUSG00000083411	Rpl30-ps10	processed_pseudogene	MGI Symbol	1	ribosomal protein L30, pseudogene 10 [Source:MGI Symbol;Acc:MGI:3646270]	0.236852	1.87552	1.32643	0.190367	0.999227	-5.29106
ENSMUSG00000045912	C2cd4c	protein_coding	MGI Symbol	2	C2 calcium-dependent domain containing 4C [Source:MGI Symbol;Acc:MGI:2685084]	0.238309	1.42742	1.22965	0.224243	0.999227	-5.2923
ENSMUSG00000042129	Rassf4	protein_coding	MGI Symbol	7	Ras association (RalGDS/AF-6) domain family member 4 [Source:MGI Symbol;Acc:MGI:2386853]	0.254718	1.6519	1.2681	0.210287	0.999227	-5.29245
ENSMUSG00000022561	Gpaa1	protein_coding	MGI Symbol	12	GPI anchor attachment protein 1 [Source:MGI Symbol;Acc:MGI:1202392]	-0.1548	4.87895	-1.72546	0.0902542	0.999227	-5.29262
ENSMUSG00000113429	Gm20063	lincRNA	MGI Symbol	1	predicted gene, 20063 [Source:MGI Symbol;Acc:MGI:5012248]	0.244358	2.47844	1.39162	0.169835	0.999227	-5.29385
ENSMUSG00000117010	Gm49933	processed_pseudogene	MGI Symbol	1	predicted gene, 49933 [Source:MGI Symbol;Acc:MGI:6270643]	0.301244	-0.0859095	0.913365	0.365175	0.999227	-5.29402
ENSMUSG00000043843	Tmem145	protein_coding	MGI Symbol	4	transmembrane protein 145 [Source:MGI Symbol;Acc:MGI:3607779]	-0.461346	0.119742	-1.07933	0.285314	0.999227	-5.29417
ENSMUSG00000029713	Gnb2	protein_coding	MGI Symbol	15	guanine nucleotide binding protein (G protein), beta 2 [Source:MGI Symbol;Acc:MGI:95784]	-0.277894	6.96222	-1.8182	0.0746695	0.999227	-5.29425
ENSMUSG00000079608	Stard6	protein_coding	MGI Symbol	7	StAR-related lipid transfer (START) domain containing 6 [Source:MGI Symbol;Acc:MGI:2156774]	-0.263493	0.858842	-1.19276	0.238259	0.999227	-5.29432
ENSMUSG00000050211	Pla2g4e	protein_coding	MGI Symbol	4	phospholipase A2, group IVE [Source:MGI Symbol;Acc:MGI:1919144]	0.29596	1.79335	1.26733	0.21056	0.999227	-5.29458
ENSMUSG00000113029	Gm40578	antisense	MGI Symbol	2	predicted gene, 40578 [Source:MGI Symbol;Acc:MGI:5623463]	0.251814	1.20028	1.19043	0.239166	0.999227	-5.29569
ENSMUSG00000019842	Traf3ip2	protein_coding	MGI Symbol	5	TRAF3 interacting protein 2 [Source:MGI Symbol;Acc:MGI:2143599]	0.239353	0.619695	1.04839	0.299201	0.999227	-5.29577
ENSMUSG00000082045	Gm11585	processed_pseudogene	MGI Symbol	1	predicted gene 11585 [Source:MGI Symbol;Acc:MGI:3651395]	-0.226122	-0.0531032	-0.977662	0.33267	0.999227	-5.29579
ENSMUSG00000097331	F420014N23Rik	lincRNA	MGI Symbol	2	RIKEN cDNA F420014N23 gene [Source:MGI Symbol;Acc:MGI:3642477]	-0.327302	-0.336697	-0.899146	0.37263	0.999227	-5.29652
ENSMUSG00000034071	Zfp551	protein_coding	MGI Symbol	3	zinc fingr protein 551 [Source:MGI Symbol;Acc:MGI:3588205]	0.210662	3.07056	1.49439	0.140986	0.999227	-5.2968
ENSMUSG00000037664	Cdkn1c	protein_coding	MGI Symbol	5	cyclin-dependent kinase inhibitor 1C (P57) [Source:MGI Symbol;Acc:MGI:104564]	-0.472179	0.823537	-1.19219	0.238483	0.999227	-5.29703
ENSMUSG00000062980	Cped1	protein_coding	MGI Symbol	8	cadherin-like and PC-esterase domain containing 1 [Source:MGI Symbol;Acc:MGI:2444814]	-0.39808	-0.289499	-0.958093	0.342353	0.999227	-5.29746
ENSMUSG00000029048	Rer1	protein_coding	MGI Symbol	3	retention in endoplasmic reticulum sorting receptor 1 [Source:MGI Symbol;Acc:MGI:1915080]	-0.170669	6.58004	-1.80752	0.076341	0.999227	-5.29758
ENSMUSG00000113504	Selenok-ps5	processed_pseudogene	MGI Symbol	1	selenoprotein K, pseudogene 5 [Source:MGI Symbol;Acc:MGI:5012170]	0.270798	0.067377	0.964467	0.339179	0.999227	-5.29803
ENSMUSG00000038195	Rilp	protein_coding	MGI Symbol	2	Rab interacting lysosomal protein [Source:MGI Symbol;Acc:MGI:2144271]	-0.280593	1.40358	-1.27365	0.208327	0.999227	-5.29818
ENSMUSG00000115819	Gm9108	processed_pseudogene	MGI Symbol	1	predicted gene 9108 [Source:MGI Symbol;Acc:MGI:3648830]	0.22932	0.0174161	0.956705	0.343047	0.999227	-5.29834
ENSMUSG00000075270	Pde11a	protein_coding	MGI Symbol	3	phosphodiesterase 11A [Source:MGI Symbol;Acc:MGI:3036251]	0.255892	2.30767	1.35541	0.181019	0.999227	-5.29904
ENSMUSG00000000317	Bcl6b	protein_coding	MGI Symbol	3	B cell CLL/lymphoma 6, member B [Source:MGI Symbol;Acc:MGI:1278332]	-0.251881	0.531102	-1.11015	0.271931	0.999227	-5.29949
ENSMUSG00000022766	Serpind1	protein_coding	MGI Symbol	2	serine (or cysteine) peptidase inhibitor, clade D, member 1 [Source:MGI Symbol;Acc:MGI:96051]	-0.368068	0.718382	-1.11097	0.27158	0.999227	-5.29954
ENSMUSG00000035711	Dok3	protein_coding	MGI Symbol	3	docking protein 3 [Source:MGI Symbol;Acc:MGI:1351490]	0.291923	0.470698	1.02825	0.308489	0.999227	-5.30036
ENSMUSG00000042328	Hps4	protein_coding	MGI Symbol	7	HPS4, biogenesis of lysosomal organelles complex 3 subunit 2 [Source:MGI Symbol;Acc:MGI:2177742]	-0.163314	3.90619	-1.62288	0.110532	0.999227	-5.30037
ENSMUSG00000031093	Dock11	protein_coding	MGI Symbol	5	dedicator of cytokinesis 11 [Source:MGI Symbol;Acc:MGI:1923224]	-0.207872	2.79428	-1.49418	0.141042	0.999227	-5.30052
ENSMUSG00000090164	BC035044	protein_coding	MGI Symbol	2	cDNA sequence BC035044 [Source:MGI Symbol;Acc:MGI:2448540]	0.307389	0.203816	0.954209	0.344297	0.999227	-5.30081
ENSMUSG00000035735	Dagla	protein_coding	MGI Symbol	3	diacylglycerol lipase, alpha [Source:MGI Symbol;Acc:MGI:2677061]	-0.253042	5.98205	-1.78919	0.0792819	0.999227	-5.30083
ENSMUSG00000006378	Gcat	protein_coding	MGI Symbol	2	glycine C-acetyltransferase (2-amino-3-ketobutyrate-coenzyme A ligase) [Source:MGI Symbol;Acc:MGI:1349389]	-0.159854	1.91355	-1.36501	0.178001	0.999227	-5.30134
ENSMUSG00000060029	4930473A02Rik	antisense	MGI Symbol	2	RIKEN cDNA 4930473A02 gene [Source:MGI Symbol;Acc:MGI:2447823]	0.25172	-0.0970874	0.84468	0.402075	0.999227	-5.30148
ENSMUSG00000038180	Spag4	protein_coding	MGI Symbol	8	sperm associated antigen 4 [Source:MGI Symbol;Acc:MGI:2444120]	-0.245711	0.868073	-1.17553	0.245022	0.999227	-5.30165
ENSMUSG00000091989	Ndufab1-ps	processed_pseudogene	MGI Symbol	1	NADH:ubiquinone oxidoreductase subunit AB1b [Source:MGI Symbol;Acc:MGI:4936891]	-0.319576	2.61917	-1.48402	0.14371	0.999227	-5.30201
ENSMUSG00000043153	Crppa	protein_coding	MGI Symbol	7	CDP-L-ribitol pyrophosphorylase A [Source:MGI Symbol;Acc:MGI:1923097]	-0.180812	3.46287	-1.57626	0.120898	0.999227	-5.30225
ENSMUSG00000085776	5430402O13Rik	antisense	MGI Symbol	2	RIKEN cDNA 5430402O13 gene [Source:MGI Symbol;Acc:MGI:1918631]	-0.268582	0.395123	-1.08245	0.283938	0.999227	-5.30233
ENSMUSG00000024308	Tapbp	protein_coding	MGI Symbol	9	TAP binding protein [Source:MGI Symbol;Acc:MGI:1201689]	-0.185196	4.45308	-1.68183	0.0984688	0.999227	-5.30254
ENSMUSG00000001403	Ube2c	protein_coding	MGI Symbol	2	ubiquitin-conjugating enzyme E2C [Source:MGI Symbol;Acc:MGI:1915862]	0.28182	-0.0464226	0.881213	0.382169	0.999227	-5.30441
ENSMUSG00000036918	Ttc7	protein_coding	MGI Symbol	10	tetratricopeptide repeat domain 7 [Source:MGI Symbol;Acc:MGI:1920999]	-0.238298	1.37774	-1.27681	0.20722	0.999227	-5.30521
ENSMUSG00000028121	Bcar3	protein_coding	MGI Symbol	10	breast cancer anti-estrogen resistance 3 [Source:MGI Symbol;Acc:MGI:1352501]	-0.211086	2.68548	-1.46936	0.14763	0.999227	-5.30571
ENSMUSG00000092167	Gm3696	protein_coding	MGI Symbol	2	predicted gene 3696 [Source:MGI Symbol;Acc:MGI:3781872]	-0.221141	1.17552	-1.243	0.219323	0.999227	-5.30609
ENSMUSG00000058099	Nfam1	protein_coding	MGI Symbol	5	Nfat activating molecule with ITAM motif 1 [Source:MGI Symbol;Acc:MGI:1921289]	0.248065	1.11978	1.14545	0.257153	0.999227	-5.3067
ENSMUSG00000031805	Jak3	protein_coding	MGI Symbol	5	Janus kinase 3 [Source:MGI Symbol;Acc:MGI:99928]	-0.336075	0.338051	-1.07912	0.285406	0.999227	-5.30691
ENSMUSG00000033949	Trim36	protein_coding	MGI Symbol	3	tripartite motif-containing 36 [Source:MGI Symbol;Acc:MGI:106264]	-0.247476	2.11527	-1.38581	0.171592	0.999227	-5.30694
ENSMUSG00000112922	Gm47572	TEC	MGI Symbol	1	predicted gene, 47572 [Source:MGI Symbol;Acc:MGI:6096602]	-0.272216	0.0389088	-0.975704	0.333631	0.999227	-5.30706
ENSMUSG00000053113	Socs3	protein_coding	MGI Symbol	3	suppressor of cytokine signaling 3 [Source:MGI Symbol;Acc:MGI:1201791]	-0.391215	-0.714431	-0.833658	0.408204	0.999227	-5.30715
ENSMUSG00000033777	Tlr13	protein_coding	MGI Symbol	2	toll-like receptor 13 [Source:MGI Symbol;Acc:MGI:3045213]	-0.311171	-0.269226	-0.904381	0.369874	0.999227	-5.30721
ENSMUSG00000116041	Gm20369	processed_pseudogene	MGI Symbol	1	predicted gene, 20369 [Source:MGI Symbol;Acc:MGI:5012554]	0.225751	0.0500367	0.940091	0.351423	0.999227	-5.30732
ENSMUSG00000004655	Aqp1	protein_coding	MGI Symbol	1	aquaporin 1 [Source:MGI Symbol;Acc:MGI:103201]	-0.678878	-2.19816	-0.557053	0.579829	0.999227	-5.30748
ENSMUSG00000021958	Pinx1	protein_coding	MGI Symbol	3	PIN2/TERF1 interacting, telomerase inhibitor 1 [Source:MGI Symbol;Acc:MGI:1919650]	-0.160864	3.69897	-1.59897	0.115756	0.999227	-5.3075
ENSMUSG00000079547	H2-DMb1	protein_coding	MGI Symbol	3	histocompatibility 2, class II, locus Mb1 [Source:MGI Symbol;Acc:MGI:95922]	0.276572	0.681722	1.07325	0.288005	0.999227	-5.30831
ENSMUSG00000031409	Tceal6	protein_coding	MGI Symbol	1	transcription elongation factor A (SII)-like 6 [Source:MGI Symbol;Acc:MGI:1923939]	-0.163717	6.56829	-1.80114	0.0773542	0.999227	-5.30899
ENSMUSG00000027610	Gss	protein_coding	MGI Symbol	9	glutathione synthetase [Source:MGI Symbol;Acc:MGI:95852]	0.159199	5.18186	1.72076	0.0911105	0.999227	-5.3094
ENSMUSG00000027875	Hmgcs2	protein_coding	MGI Symbol	2	3-hydroxy-3-methylglutaryl-Coenzyme A synthase 2 [Source:MGI Symbol;Acc:MGI:101939]	0.371463	2.21027	1.33166	0.188654	0.999227	-5.30972
ENSMUSG00000031461	Myom2	protein_coding	MGI Symbol	5	myomesin 2 [Source:MGI Symbol;Acc:MGI:1328358]	0.325746	-0.0408309	0.86963	0.388413	0.999227	-5.31007
ENSMUSG00000026062	Slc9a2	protein_coding	MGI Symbol	3	solute carrier family 9 (sodium/hydrogen exchanger), member 2 [Source:MGI Symbol;Acc:MGI:105075]	-0.22312	3.24245	-1.53813	0.129948	0.999227	-5.31212
ENSMUSG00000109495	Gm47692	processed_pseudogene	MGI Symbol	1	predicted gene, 47692 [Source:MGI Symbol;Acc:MGI:6096800]	0.234418	1.33284	1.19723	0.236528	0.999227	-5.31227
ENSMUSG00000058743	Kcnj14	protein_coding	MGI Symbol	2	potassium inwardly-rectifying channel, subfamily J, member 14 [Source:MGI Symbol;Acc:MGI:2384820]	-0.29845	0.162115	-1.00539	0.319263	0.999227	-5.3135
ENSMUSG00000012819	Cdh23	protein_coding	MGI Symbol	16	cadherin 23 (otocadherin) [Source:MGI Symbol;Acc:MGI:1890219]	-0.334122	-0.409692	-0.881398	0.38207	0.999227	-5.31369
ENSMUSG00000023947	Nfkbie	protein_coding	MGI Symbol	3	nuclear factor of kappa light polypeptide gene enhancer in B cells inhibitor, epsilon [Source:MGI Symbol;Acc:MGI:1194908]	0.246328	2.37659	1.3645	0.17816	0.999227	-5.31372
ENSMUSG00000109321	A330076H08Rik	processed_transcript	MGI Symbol	3	RIKEN cDNA A330076H08 gene [Source:MGI Symbol;Acc:MGI:2443193]	0.320776	1.25933	1.13848	0.260025	0.999227	-5.31448
ENSMUSG00000069376	Gm5507	processed_pseudogene	MGI Symbol	1	predicted gene 5507 [Source:MGI Symbol;Acc:MGI:3648656]	0.226384	0.234419	0.970141	0.33637	0.999227	-5.31471
ENSMUSG00000098243	Gm4258	processed_transcript	MGI Symbol	2	predicted gene 4258 [Source:MGI Symbol;Acc:MGI:3782435]	-0.292245	-0.382077	-0.859646	0.393845	0.999227	-5.31498
ENSMUSG00000023984	Gm20517	protein_coding	MGI Symbol	3	predicted gene 20517 [Source:MGI Symbol;Acc:MGI:5141982]	-0.208652	0.241747	-1.0386	0.303691	0.999227	-5.31538
ENSMUSG00000099843	Gm7160	lincRNA	MGI Symbol	2	predicted gene 7160 [Source:MGI Symbol;Acc:MGI:3646078]	0.301767	0.0115809	0.878288	0.38374	0.999227	-5.31545
ENSMUSG00000108322	5430431A17Rik	lincRNA	MGI Symbol	2	RIKEN cDNA 5430431A17 gene [Source:MGI Symbol;Acc:MGI:1918618]	0.36468	-0.815228	0.633867	0.528886	0.999227	-5.31549
ENSMUSG00000084342	Gm11224	processed_pseudogene	MGI Symbol	1	predicted gene 11224 [Source:MGI Symbol;Acc:MGI:3651640]	-0.204095	0.674632	-1.1198	0.267834	0.999227	-5.31589
ENSMUSG00000037773	Pced1a	protein_coding	MGI Symbol	7	PC-esterase domain containing 1A [Source:MGI Symbol;Acc:MGI:2442177]	0.15951	3.45909	1.52997	0.131955	0.999227	-5.31613
ENSMUSG00000046585	Cfap58	protein_coding	MGI Symbol	2	cilia and flagella associated protein 58 [Source:MGI Symbol;Acc:MGI:2685815]	-0.340311	0.0260028	-1.01494	0.314733	0.999227	-5.31634
ENSMUSG00000030247	Kcnj8	protein_coding	MGI Symbol	2	potassium inwardly-rectifying channel, subfamily J, member 8 [Source:MGI Symbol;Acc:MGI:1100508]	-0.337432	0.606398	-1.125	0.265643	0.999227	-5.31729
ENSMUSG00000037321	Tap1	protein_coding	MGI Symbol	7	transporter 1, ATP-binding cassette, sub-family B (MDR/TAP) [Source:MGI Symbol;Acc:MGI:98483]	-0.272157	0.617106	-1.09846	0.276952	0.999227	-5.31753
ENSMUSG00000055125	M5C1000I18Rik	lincRNA	MGI Symbol	3	RIKEN cDNA M5C1000I18 gene [Source:MGI Symbol;Acc:MGI:3642038]	-0.231994	2.65375	-1.47212	0.146884	0.999227	-5.3176
ENSMUSG00000027420	Bfsp1	protein_coding	MGI Symbol	2	beaded filament structural protein 1, in lens-CP94 [Source:MGI Symbol;Acc:MGI:101770]	-0.437349	-0.530888	-0.834585	0.407687	0.999227	-5.31823
ENSMUSG00000067071	Hes6	protein_coding	MGI Symbol	5	hairy and enhancer of split 6 [Source:MGI Symbol;Acc:MGI:1859852]	-0.238963	3.65196	-1.60032	0.115454	0.999227	-5.31851
ENSMUSG00000106164	9430085M18Rik	lincRNA	MGI Symbol	1	RIKEN cDNA 9430085M18 gene [Source:MGI Symbol;Acc:MGI:1924611]	0.216962	1.16523	1.16994	0.247245	0.999227	-5.31884
ENSMUSG00000047821	Trim16	protein_coding	MGI Symbol	5	tripartite motif-containing 16 [Source:MGI Symbol;Acc:MGI:2137356]	0.31097	-0.710419	0.613527	0.542144	0.999227	-5.31951
ENSMUSG00000026831	1700007K13Rik	protein_coding	MGI Symbol	3	RIKEN cDNA 1700007K13 gene [Source:MGI Symbol;Acc:MGI:1916577]	-0.311649	-0.206767	-0.94155	0.350683	0.999227	-5.32019
ENSMUSG00000025963	Mdh1b	protein_coding	MGI Symbol	1	malate dehydrogenase 1B, NAD (soluble) [Source:MGI Symbol;Acc:MGI:1923918]	-0.355422	-0.170961	-0.953553	0.344626	0.999227	-5.32024
ENSMUSG00000032135	Mcam	protein_coding	MGI Symbol	6	melanoma cell adhesion molecule [Source:MGI Symbol;Acc:MGI:1933966]	-0.285312	2.41993	-1.42709	0.159402	0.999227	-5.32025
ENSMUSG00000055489	Ano5	protein_coding	MGI Symbol	3	anoctamin 5 [Source:MGI Symbol;Acc:MGI:3576659]	0.297669	1.30716	1.17467	0.245361	0.999227	-5.32053
ENSMUSG00000029868	Trpv6	protein_coding	MGI Symbol	2	transient receptor potential cation channel, subfamily V, member 6 [Source:MGI Symbol;Acc:MGI:1927259]	-0.293183	-0.104654	-0.942302	0.350301	0.999227	-5.32073
ENSMUSG00000033061	Resp18	protein_coding	MGI Symbol	4	regulated endocrine-specific protein 18 [Source:MGI Symbol;Acc:MGI:1098222]	0.19484	4.51439	1.64574	0.105718	0.999227	-5.32079
ENSMUSG00000073233	Nfyc-ps	processed_pseudogene	MGI Symbol	1	nuclear transcription factor-Y gamma, pseudogene [Source:MGI Symbol;Acc:MGI:3643264]	-0.279283	0.694737	-1.13187	0.26277	0.999227	-5.32148
ENSMUSG00000030917	Tmem159	protein_coding	MGI Symbol	4	transmembrane protein 159 [Source:MGI Symbol;Acc:MGI:1925752]	0.174951	4.29314	1.621	0.110935	0.999227	-5.32262
ENSMUSG00000103544	Gm10048	TEC	MGI Symbol	2	predicted gene 10048 [Source:MGI Symbol;Acc:MGI:3644560]	0.406094	-0.0191574	0.803	0.42555	0.999227	-5.32268
ENSMUSG00000046169	Adamts6	protein_coding	MGI Symbol	7	a disintegrin-like and metallopeptidase (reprolysin type) with thrombospondin type 1 motif, 6 [Source:MGI Symbol;Acc:MGI:1347348]	-0.297566	-0.192963	-0.907463	0.368257	0.999227	-5.3229
ENSMUSG00000092335	Zfp977	protein_coding	MGI Symbol	1	zinc finger protein 977 [Source:MGI Symbol;Acc:MGI:3645327]	-0.318749	0.0243264	-0.994197	0.324631	0.999227	-5.32304
ENSMUSG00000107996	Gm44228	TEC	MGI Symbol	1	predicted gene, 44228 [Source:MGI Symbol;Acc:MGI:5690620]	0.362118	-0.32562	0.791752	0.432024	0.999227	-5.3231
ENSMUSG00000034177	Rnf43	protein_coding	MGI Symbol	9	ring finger protein 43 [Source:MGI Symbol;Acc:MGI:2442609]	-0.192104	0.626629	-1.10047	0.276086	0.999227	-5.32325
ENSMUSG00000037617	Spag1	protein_coding	MGI Symbol	8	sperm associated antigen 1 [Source:MGI Symbol;Acc:MGI:1349387]	-0.295242	2.33711	-1.42325	0.160508	0.999227	-5.32329
ENSMUSG00000081657	Gm15466	processed_pseudogene	MGI Symbol	1	predicted gene 15466 [Source:MGI Symbol;Acc:MGI:3705491]	0.233923	-0.122551	0.854669	0.39657	0.999227	-5.32352
ENSMUSG00000031027	Stk33	protein_coding	MGI Symbol	5	serine/threonine kinase 33 [Source:MGI Symbol;Acc:MGI:2152419]	0.301448	1.2446	1.16153	0.250614	0.999227	-5.32435
ENSMUSG00000107968	Gm44419	processed_pseudogene	MGI Symbol	1	predicted gene, 44419 [Source:MGI Symbol;Acc:MGI:5690811]	-0.251679	0.864498	-1.16609	0.248783	0.999227	-5.32481
ENSMUSG00000062778	Chia1	protein_coding	MGI Symbol	3	chitinase, acidic 1 [Source:MGI Symbol;Acc:MGI:1932052]	0.286534	0.451804	0.931681	0.355714	0.999227	-5.32498
ENSMUSG00000102664	Gm38380	TEC	MGI Symbol	1	predicted gene, 38380 [Source:MGI Symbol;Acc:MGI:5611608]	0.332517	-0.722226	0.659477	0.512437	0.999227	-5.32602
ENSMUSG00000024425	Ndfip1	protein_coding	MGI Symbol	8	Nedd4 family interacting protein 1 [Source:MGI Symbol;Acc:MGI:1929601]	-0.32126	7.75368	-1.81108	0.0757804	0.999227	-5.32612
ENSMUSG00000027859	Ngf	protein_coding	MGI Symbol	4	nerve growth factor [Source:MGI Symbol;Acc:MGI:97321]	-0.212416	2.38319	-1.41201	0.163775	0.999227	-5.32626
ENSMUSG00000019773	Fbxo5	protein_coding	MGI Symbol	2	F-box protein 5 [Source:MGI Symbol;Acc:MGI:1914391]	-0.307995	0.411327	-1.06524	0.291583	0.999227	-5.32641
ENSMUSG00000042675	Ypel3	protein_coding	MGI Symbol	11	yippee like 3 [Source:MGI Symbol;Acc:MGI:1913340]	-0.415928	5.84586	-1.77444	0.0817164	0.999227	-5.32672
ENSMUSG00000003402	Prkcsh	protein_coding	MGI Symbol	5	protein kinase C substrate 80K-H [Source:MGI Symbol;Acc:MGI:107877]	-0.205233	5.04359	-1.71905	0.0914242	0.999227	-5.32673
ENSMUSG00000064344	mt-Tm	Mt_tRNA	MGI Symbol	1	mitochondrially encoded tRNA methionine [Source:MGI Symbol;Acc:MGI:102480]	0.388871	0.598119	1.02474	0.310124	0.999227	-5.3268
ENSMUSG00000069920	B3gnt9	protein_coding	MGI Symbol	3	UDP-GlcNAc:betaGal beta-1,3-N-acetylglucosaminyltransferase 9 [Source:MGI Symbol;Acc:MGI:2142841]	-0.295888	0.211333	-1.06257	0.292779	0.999227	-5.32698
ENSMUSG00000103375	Gm37181	TEC	MGI Symbol	1	predicted gene, 37181 [Source:MGI Symbol;Acc:MGI:5610409]	0.350091	-1.06287	0.554202	0.581764	0.999227	-5.32702
ENSMUSG00000097276	4930525G20Rik	antisense	MGI Symbol	1	RIKEN cDNA 4930525G20 gene [Source:MGI Symbol;Acc:MGI:2443505]	0.306196	0.501452	0.989419	0.326941	0.999227	-5.32763
ENSMUSG00000028977	Casz1	protein_coding	MGI Symbol	7	castor zinc finger 1 [Source:MGI Symbol;Acc:MGI:1196251]	-0.309207	1.53427	-1.29146	0.202131	0.999227	-5.32769
ENSMUSG00000003228	Grk5	protein_coding	MGI Symbol	3	G protein-coupled receptor kinase 5 [Source:MGI Symbol;Acc:MGI:109161]	-0.190933	2.57298	-1.44373	0.154684	0.999227	-5.32806
ENSMUSG00000035184	Fam124a	protein_coding	MGI Symbol	4	family with sequence similarity 124, member A [Source:MGI Symbol;Acc:MGI:3645930]	-0.169533	3.51072	-1.55959	0.124791	0.999227	-5.32821
ENSMUSG00000019823	Mical1	protein_coding	MGI Symbol	12	microtubule associated monooxygenase, calponin and LIM domain containing 1 [Source:MGI Symbol;Acc:MGI:2385847]	0.286623	1.75088	1.24375	0.219048	0.999227	-5.32822
ENSMUSG00000051652	Lrrc3	protein_coding	MGI Symbol	1	leucine rich repeat containing 3 [Source:MGI Symbol;Acc:MGI:2447899]	-0.255158	1.54086	-1.24417	0.218893	0.999227	-5.32918
ENSMUSG00000114045	Gm34220	TEC	MGI Symbol	1	predicted gene, 34220 [Source:MGI Symbol;Acc:MGI:5593379]	0.281587	0.82784	1.06288	0.292642	0.999227	-5.32945
ENSMUSG00000028060	Khdc4	protein_coding	MGI Symbol	10	KH domain containing 4, pre-mRNA splicing factor [Source:MGI Symbol;Acc:MGI:1921450]	-0.22024	4.7833	-1.69591	0.0957524	0.999227	-5.32967
ENSMUSG00000035868	Zfp983	protein_coding	MGI Symbol	2	zinc finger protein 983 [Source:MGI Symbol;Acc:MGI:1920479]	0.198242	2.74739	1.43683	0.156625	0.999227	-5.33026
ENSMUSG00000048731	Ggnbp1	protein_coding	MGI Symbol	9	gametogenetin binding protein 1 [Source:MGI Symbol;Acc:MGI:3055306]	0.246321	-0.462448	0.718567	0.475555	0.999227	-5.33044
ENSMUSG00000003746	Man1a	protein_coding	MGI Symbol	8	mannosidase 1, alpha [Source:MGI Symbol;Acc:MGI:104677]	-0.228585	4.56825	-1.67507	0.0997952	0.999227	-5.33053
ENSMUSG00000085363	Gm15478	antisense	MGI Symbol	1	predicted gene 15478 [Source:MGI Symbol;Acc:MGI:3705145]	-0.350676	-0.121388	-0.935538	0.353742	0.999227	-5.33056
ENSMUSG00000051116	Gm8121	processed_pseudogene	MGI Symbol	1	predicted pseudogene 8121 [Source:MGI Symbol;Acc:MGI:3645325]	0.22342	0.664653	1.03749	0.304205	0.999227	-5.33073
ENSMUSG00000058756	Thra	protein_coding	MGI Symbol	9	thyroid hormone receptor alpha [Source:MGI Symbol;Acc:MGI:98742]	-0.195078	7.83904	-1.80818	0.0762362	0.999227	-5.3309
ENSMUSG00000024136	Dnase1l2	protein_coding	MGI Symbol	6	deoxyribonuclease 1-like 2 [Source:MGI Symbol;Acc:MGI:1913955]	0.312304	-0.484029	0.734793	0.465695	0.999227	-5.33095
ENSMUSG00000091900	Gm4353	processed_pseudogene	MGI Symbol	1	predicted gene 4353 [Source:MGI Symbol;Acc:MGI:3782538]	0.262339	-0.12209	0.867949	0.389324	0.999227	-5.33103
ENSMUSG00000027472	Pdrg1	protein_coding	MGI Symbol	8	p53 and DNA damage regulated 1 [Source:MGI Symbol;Acc:MGI:1915809]	0.151836	6.0539	1.76425	0.0834347	0.999227	-5.33123
ENSMUSG00000090086	AI480526	lincRNA	MGI Symbol	7	expressed sequence AI480526 [Source:MGI Symbol;Acc:MGI:2140910]	0.324431	1.14223	1.10947	0.272221	0.999227	-5.33126
ENSMUSG00000106292	Gm43174	TEC	MGI Symbol	1	predicted gene 43174 [Source:MGI Symbol;Acc:MGI:5663311]	0.377379	-0.934544	0.530401	0.598043	0.999227	-5.33136
ENSMUSG00000049422	Chchd10	protein_coding	MGI Symbol	3	coiled-coil-helix-coiled-coil-helix domain containing 10 [Source:MGI Symbol;Acc:MGI:2143558]	-0.566742	4.51151	-1.69607	0.0957232	0.999227	-5.33155
ENSMUSG00000032952	Ap4b1	protein_coding	MGI Symbol	7	adaptor-related protein complex AP-4, beta 1 [Source:MGI Symbol;Acc:MGI:1337130]	-0.216871	0.38556	-1.0412	0.302496	0.999227	-5.33155
ENSMUSG00000115785	Gm6740	TEC	MGI Symbol	1	predicted gene 6740 [Source:MGI Symbol;Acc:MGI:3643503]	-0.211097	0.0104125	-0.961737	0.340536	0.999227	-5.33182
ENSMUSG00000022856	Tmem41a	protein_coding	MGI Symbol	2	transmembrane protein 41a [Source:MGI Symbol;Acc:MGI:1913914]	-0.183496	4.00857	-1.61528	0.112171	0.999227	-5.33197
ENSMUSG00000010609	Psen2	protein_coding	MGI Symbol	12	presenilin 2 [Source:MGI Symbol;Acc:MGI:109284]	-0.192301	3.49214	-1.55462	0.12597	0.999227	-5.33223
ENSMUSG00000044268	Gm4895	processed_pseudogene	MGI Symbol	1	predicted gene 4895 [Source:MGI Symbol;Acc:MGI:3648582]	0.233641	-0.0501963	0.868787	0.388869	0.999227	-5.33355
ENSMUSG00000104339	C130089K02Rik	TEC	MGI Symbol	1	RIKEN cDNA C130089K02 gene [Source:MGI Symbol;Acc:MGI:2444420]	0.340866	-0.716241	0.566866	0.573191	0.999227	-5.33379
ENSMUSG00000109139	Gm44798	TEC	MGI Symbol	1	predicted gene 44798 [Source:MGI Symbol;Acc:MGI:5753374]	-0.532558	-0.466667	-0.780387	0.438624	0.999227	-5.33381
ENSMUSG00000060647	Gm7099	processed_pseudogene	MGI Symbol	1	predicted gene 7099 [Source:MGI Symbol;Acc:MGI:3646387]	0.236028	-0.125478	0.880839	0.38237	0.999227	-5.33399
ENSMUSG00000047369	Dnah14	protein_coding	MGI Symbol	10	dynein, axonemal, heavy chain 14 [Source:MGI Symbol;Acc:MGI:2444525]	0.272897	0.0927063	0.902172	0.371035	0.999227	-5.33431
ENSMUSG00000001827	Folr1	protein_coding	MGI Symbol	16	folate receptor 1 (adult) [Source:MGI Symbol;Acc:MGI:95568]	-1.16369	-0.0819022	-1.06295	0.292609	0.999227	-5.33499
ENSMUSG00000046139	Patl1	protein_coding	MGI Symbol	2	protein associated with topoisomerase II homolog 1 (yeast) [Source:MGI Symbol;Acc:MGI:2147679]	0.170795	4.09132	1.59566	0.116493	0.999227	-5.33504
ENSMUSG00000020953	Coch	protein_coding	MGI Symbol	4	cochlin [Source:MGI Symbol;Acc:MGI:1278313]	-0.491463	1.18019	-1.2194	0.228076	0.999227	-5.33554
ENSMUSG00000029674	Limk1	protein_coding	MGI Symbol	6	LIM-domain containing, protein kinase [Source:MGI Symbol;Acc:MGI:104572]	0.249964	2.79815	1.42183	0.160917	0.999227	-5.33584
ENSMUSG00000069495	Epc2	protein_coding	MGI Symbol	2	enhancer of polycomb homolog 2 [Source:MGI Symbol;Acc:MGI:1278321]	-0.127977	5.00967	-1.70886	0.09331	0.999227	-5.33608
ENSMUSG00000082423	Gm15148	processed_pseudogene	MGI Symbol	1	predicted gene 15148 [Source:MGI Symbol;Acc:MGI:3705350]	-0.228318	-0.303969	-0.92581	0.358729	0.999227	-5.33614
ENSMUSG00000001228	Uhrf1	protein_coding	MGI Symbol	7	ubiquitin-like, containing PHD and RING finger domains, 1 [Source:MGI Symbol;Acc:MGI:1338889]	0.268148	-0.16247	0.826568	0.412177	0.999227	-5.33639
ENSMUSG00000007080	Pole	protein_coding	MGI Symbol	7	polymerase (DNA directed), epsilon [Source:MGI Symbol;Acc:MGI:1196391]	-0.269808	-0.326373	-0.83001	0.410245	0.999227	-5.33684
ENSMUSG00000102796	Gm37711	TEC	MGI Symbol	1	predicted gene, 37711 [Source:MGI Symbol;Acc:MGI:5610939]	0.28765	0.374163	0.929769	0.356694	0.999227	-5.33704
ENSMUSG00000017491	Rarb	protein_coding	MGI Symbol	7	retinoic acid receptor, beta [Source:MGI Symbol;Acc:MGI:97857]	-0.369335	-0.247154	-0.89537	0.374626	0.999227	-5.3371
ENSMUSG00000060860	Ube2s	protein_coding	MGI Symbol	5	ubiquitin-conjugating enzyme E2S [Source:MGI Symbol;Acc:MGI:1925141]	-0.542255	3.19945	-1.56253	0.124099	0.999227	-5.33737
ENSMUSG00000086075	Gm15728	lincRNA	MGI Symbol	2	predicted gene 15728 [Source:MGI Symbol;Acc:MGI:3783171]	0.206015	2.48968	1.36061	0.179377	0.999227	-5.33744
ENSMUSG00000051599	Pcdhb2	protein_coding	MGI Symbol	2	protocadherin beta 2 [Source:MGI Symbol;Acc:MGI:2136735]	0.393449	-0.577927	0.700717	0.486536	0.999227	-5.33767
ENSMUSG00000043850	Clrn1	protein_coding	MGI Symbol	4	clarin 1 [Source:MGI Symbol;Acc:MGI:2388124]	0.322717	0.0114196	0.826711	0.412097	0.999227	-5.33794
ENSMUSG00000040841	Six5	protein_coding	MGI Symbol	1	sine oculis-related homeobox 5 [Source:MGI Symbol;Acc:MGI:106220]	-0.320264	-0.192454	-0.928231	0.357484	0.999227	-5.338
ENSMUSG00000028344	Invs	protein_coding	MGI Symbol	6	inversin [Source:MGI Symbol;Acc:MGI:1335082]	0.252843	1.67795	1.23213	0.223323	0.999227	-5.33818
ENSMUSG00000017697	Ada	protein_coding	MGI Symbol	2	adenosine deaminase [Source:MGI Symbol;Acc:MGI:87916]	0.319535	0.404322	0.891795	0.376522	0.999227	-5.33861
ENSMUSG00000074235	Gm10649	bidirectional_promoter_lncRNA	MGI Symbol	3	predicted gene 10649 [Source:MGI Symbol;Acc:MGI:3642042]	-0.256325	1.26376	-1.21782	0.22867	0.999227	-5.33866
ENSMUSG00000054612	Mgmt	protein_coding	MGI Symbol	1	O-6-methylguanine-DNA methyltransferase [Source:MGI Symbol;Acc:MGI:96977]	0.210429	1.50047	1.19617	0.236939	0.999227	-5.33875
ENSMUSG00000021240	Abcd4	protein_coding	MGI Symbol	10	ATP-binding cassette, sub-family D (ALD), member 4 [Source:MGI Symbol;Acc:MGI:1349217]	-0.214254	3.19073	-1.51205	0.136445	0.999227	-5.33891
ENSMUSG00000063698	Sfxn4	protein_coding	MGI Symbol	3	sideroflexin 4 [Source:MGI Symbol;Acc:MGI:2137680]	0.171977	3.87264	1.56772	0.122881	0.999227	-5.33918
ENSMUSG00000000202	Btbd17	protein_coding	MGI Symbol	7	BTB (POZ) domain containing 17 [Source:MGI Symbol;Acc:MGI:1919264]	0.287068	-0.063852	0.875718	0.385123	0.999227	-5.34007
ENSMUSG00000063506	Arhgap22	protein_coding	MGI Symbol	8	Rho GTPase activating protein 22 [Source:MGI Symbol;Acc:MGI:2443418]	-0.266799	-0.297927	-0.871251	0.387535	0.999227	-5.34023
ENSMUSG00000107742	9530085L11Rik	TEC	MGI Symbol	1	RIKEN cDNA 9530085L11 gene [Source:MGI Symbol;Acc:MGI:2443889]	-0.261935	0.359342	-1.02708	0.309033	0.999227	-5.34052
ENSMUSG00000113165	Gm47863	bidirectional_promoter_lncRNA	MGI Symbol	1	predicted gene, 47863 [Source:MGI Symbol;Acc:MGI:6097080]	-0.312295	0.223923	-1.00857	0.317749	0.999227	-5.34058
ENSMUSG00000022323	Rida	protein_coding	MGI Symbol	4	reactive intermediate imine deaminase A homolog [Source:MGI Symbol;Acc:MGI:1095401]	0.233459	6.34082	1.76849	0.0827176	0.999227	-5.34077
ENSMUSG00000018126	Baiap2l2	protein_coding	MGI Symbol	5	BAI1-associated protein 2-like 2 [Source:MGI Symbol;Acc:MGI:2652819]	-0.298109	0.133926	-1.01401	0.315169	0.999227	-5.34078
ENSMUSG00000022521	Crebbp	protein_coding	MGI Symbol	8	CREB binding protein [Source:MGI Symbol;Acc:MGI:1098280]	0.111502	8.17127	1.80281	0.0770873	0.999227	-5.34121
ENSMUSG00000026288	Inpp5d	protein_coding	MGI Symbol	11	inositol polyphosphate-5-phosphatase D [Source:MGI Symbol;Acc:MGI:107357]	0.21487	2.73668	1.39779	0.167982	0.999227	-5.34135
ENSMUSG00000059791	Nrm	protein_coding	MGI Symbol	3	nurim (nuclear envelope membrane protein) [Source:MGI Symbol;Acc:MGI:2146855]	0.239579	0.78344	1.04664	0.300002	0.999227	-5.34193
ENSMUSG00000106874	Gm20186	lincRNA	MGI Symbol	3	predicted gene, 20186 [Source:MGI Symbol;Acc:MGI:5012371]	0.229192	1.12014	1.10334	0.27485	0.999227	-5.34236
ENSMUSG00000019975	Ikbip	protein_coding	MGI Symbol	6	IKBKB interacting protein [Source:MGI Symbol;Acc:MGI:1914704]	-0.187036	2.93767	-1.48118	0.144462	0.999227	-5.34254
ENSMUSG00000037771	Slc32a1	protein_coding	MGI Symbol	1	solute carrier family 32 (GABA vesicular transporter), member 1 [Source:MGI Symbol;Acc:MGI:1194488]	-0.232123	2.1752	-1.37288	0.175554	0.999227	-5.34296
ENSMUSG00000074890	Lcmt2	protein_coding	MGI Symbol	2	leucine carboxyl methyltransferase 2 [Source:MGI Symbol;Acc:MGI:1353659]	-0.224317	3.68035	-1.58602	0.118665	0.999227	-5.34301
ENSMUSG00000056174	Col8a2	protein_coding	MGI Symbol	2	collagen, type VIII, alpha 2 [Source:MGI Symbol;Acc:MGI:88464]	-0.523787	-0.337398	-0.950434	0.346193	0.999227	-5.34325
ENSMUSG00000078137	Ankrd63	protein_coding	MGI Symbol	1	ankyrin repeat domain 63 [Source:MGI Symbol;Acc:MGI:2686183]	0.209614	3.56452	1.53717	0.130182	0.999227	-5.34327
ENSMUSG00000032392	Parp16	protein_coding	MGI Symbol	5	poly (ADP-ribose) polymerase family, member 16 [Source:MGI Symbol;Acc:MGI:2446133]	-0.296093	1.96225	-1.34279	0.185045	0.999227	-5.34342
ENSMUSG00000097145	9230114K14Rik	processed_transcript	MGI Symbol	4	RIKEN cDNA 9230114K14 gene [Source:MGI Symbol;Acc:MGI:3041212]	0.167226	2.68198	1.4074	0.16513	0.999227	-5.344
ENSMUSG00000105942	Gm43175	TEC	MGI Symbol	1	predicted gene 43175 [Source:MGI Symbol;Acc:MGI:5663312]	0.41996	-0.0757554	0.715727	0.477292	0.999227	-5.3441
ENSMUSG00000027636	Sla2	protein_coding	MGI Symbol	2	Src-like-adaptor 2 [Source:MGI Symbol;Acc:MGI:1925049]	0.329966	0.999789	1.06915	0.289834	0.999227	-5.34424
ENSMUSG00000101834	Gm5829	processed_pseudogene	MGI Symbol	1	predicted gene 5829 [Source:MGI Symbol;Acc:MGI:3644438]	-0.235893	0.274803	-1.00446	0.319707	0.999227	-5.34427
ENSMUSG00000006720	Zfp184	protein_coding	MGI Symbol	6	zinc finger protein 184 (Kruppel-like) [Source:MGI Symbol;Acc:MGI:1922244]	-0.236351	1.17312	-1.203	0.234308	0.999227	-5.34482
ENSMUSG00000097675	1700101I11Rik	processed_transcript	MGI Symbol	2	RIKEN cDNA 1700101I11 gene [Source:MGI Symbol;Acc:MGI:1915180]	0.236994	1.37964	1.18058	0.243026	0.999227	-5.34483
ENSMUSG00000107881	Gm44250	TEC	MGI Symbol	1	predicted gene, 44250 [Source:MGI Symbol;Acc:MGI:5690642]	-0.349255	-0.334065	-0.886079	0.379566	0.999227	-5.34486
ENSMUSG00000025049	Taf5	protein_coding	MGI Symbol	1	TATA-box binding protein associated factor 5 [Source:MGI Symbol;Acc:MGI:2442144]	0.237607	1.85517	1.25012	0.216729	0.999227	-5.34504
ENSMUSG00000086448	9330162012Rik	bidirectional_promoter_lncRNA	MGI Symbol	1	cDNA RIKEN 9330162012 gene [Source:MGI Symbol;Acc:MGI:3604449]	0.257431	0.551375	1.00706	0.318468	0.999227	-5.34526
ENSMUSG00000109810	Gm45592	TEC	MGI Symbol	1	predicted gene 45592 [Source:MGI Symbol;Acc:MGI:5791428]	0.233774	0.80671	1.08007	0.284987	0.999227	-5.34553
ENSMUSG00000097825	9630001P10Rik	antisense	MGI Symbol	3	RIKEN cDNA 9630001P10 gene [Source:MGI Symbol;Acc:MGI:2441755]	-0.219572	0.729189	-1.10516	0.274067	0.999227	-5.34668
ENSMUSG00000050625	Ccdc121	protein_coding	MGI Symbol	1	coiled-coil domain containing 121 [Source:MGI Symbol;Acc:MGI:2685601]	0.295558	-0.410663	0.700249	0.486825	0.999227	-5.3473
ENSMUSG00000041120	Nbl1	protein_coding	MGI Symbol	3	NBL1, DAN family BMP antagonist [Source:MGI Symbol;Acc:MGI:104591]	-0.248388	4.74203	-1.68325	0.0981915	0.999227	-5.34813
ENSMUSG00000047090	Tmem198b	protein_coding	MGI Symbol	3	transmembrane protein 198b [Source:MGI Symbol;Acc:MGI:1921077]	-0.247315	1.24835	-1.19077	0.239036	0.999227	-5.34822
ENSMUSG00000046093	Hpcal4	protein_coding	MGI Symbol	5	hippocalcin-like 4 [Source:MGI Symbol;Acc:MGI:2157521]	0.191522	8.81805	1.80435	0.0768437	0.999227	-5.34831
ENSMUSG00000030528	Blm	protein_coding	MGI Symbol	10	Bloom syndrome, RecQ like helicase [Source:MGI Symbol;Acc:MGI:1328362]	-0.219189	1.45963	-1.2439	0.218995	0.999227	-5.34923
ENSMUSG00000039131	Gipc2	protein_coding	MGI Symbol	9	GIPC PDZ domain containing family, member 2 [Source:MGI Symbol;Acc:MGI:1889209]	0.288196	-0.32871	0.783219	0.436974	0.999227	-5.35024
ENSMUSG00000116506	5730414N17Rik	lincRNA	MGI Symbol	1	RIKEN cDNA 5730414N17 gene [Source:MGI Symbol;Acc:MGI:1917774]	-0.28672	0.683638	-1.09269	0.279458	0.999227	-5.35039
ENSMUSG00000037262	Kin	protein_coding	MGI Symbol	3	Kin17 DNA and RNA binding protein [Source:MGI Symbol;Acc:MGI:96676]	0.132205	4.39221	1.62537	0.109999	0.999227	-5.35055
ENSMUSG00000067594	Krt77	protein_coding	MGI Symbol	2	keratin 77 [Source:MGI Symbol;Acc:MGI:3588209]	-0.435276	0.39627	-1.03889	0.303559	0.999227	-5.35056
ENSMUSG00000069670	Nkain2	protein_coding	MGI Symbol	6	Na+/K+ transporting ATPase interacting 2 [Source:MGI Symbol;Acc:MGI:1923447]	-0.189298	3.65385	-1.57107	0.1221	0.999227	-5.35065
ENSMUSG00000108823	Gm18959	processed_pseudogene	MGI Symbol	1	predicted gene, 18959 [Source:MGI Symbol;Acc:MGI:5011144]	-0.215601	0.38493	-1.01484	0.314781	0.999227	-5.35127
ENSMUSG00000075266	Cenpw	protein_coding	MGI Symbol	2	centromere protein W [Source:MGI Symbol;Acc:MGI:1913561]	-0.180234	3.6608	-1.569	0.122582	0.999227	-5.35184
ENSMUSG00000038235	F11r	protein_coding	MGI Symbol	3	F11 receptor [Source:MGI Symbol;Acc:MGI:1321398]	-0.221854	2.7862	-1.44323	0.154824	0.999227	-5.35208
ENSMUSG00000031480	Thsd1	protein_coding	MGI Symbol	3	thrombospondin, type I, domain 1 [Source:MGI Symbol;Acc:MGI:1929096]	0.314581	0.276147	0.893529	0.375601	0.999227	-5.35214
ENSMUSG00000075581	Gm16409	processed_pseudogene	MGI Symbol	1	predicted gene 16409 [Source:MGI Symbol;Acc:MGI:3646708]	-0.236541	1.68944	-1.30291	0.198221	0.999227	-5.35278
ENSMUSG00000004056	Akt2	protein_coding	MGI Symbol	14	thymoma viral proto-oncogene 2 [Source:MGI Symbol;Acc:MGI:104874]	0.147212	5.96804	1.74761	0.0863068	0.999227	-5.35283
ENSMUSG00000024534	Sncaip	protein_coding	MGI Symbol	11	synuclein, alpha interacting protein (synphilin) [Source:MGI Symbol;Acc:MGI:1915097]	0.215731	1.75792	1.23387	0.222679	0.999227	-5.35346
ENSMUSG00000004356	Utp20	protein_coding	MGI Symbol	7	UTP20 small subunit processome component [Source:MGI Symbol;Acc:MGI:1917933]	0.191627	3.3526	1.49302	0.141344	0.999227	-5.35351
ENSMUSG00000034164	Emid1	protein_coding	MGI Symbol	8	EMI domain containing 1 [Source:MGI Symbol;Acc:MGI:2155091]	-0.270909	0.34046	-1.05394	0.296678	0.999227	-5.35418
ENSMUSG00000021938	Pspc1	protein_coding	MGI Symbol	4	paraspeckle protein 1 [Source:MGI Symbol;Acc:MGI:1913895]	-0.284916	4.56804	-1.67166	0.100469	0.999227	-5.3548
ENSMUSG00000105791	Gm43341	TEC	MGI Symbol	1	predicted gene 43341 [Source:MGI Symbol;Acc:MGI:5663478]	0.323627	-0.228267	0.802339	0.42593	0.999227	-5.35528
ENSMUSG00000050830	Vwc2	protein_coding	MGI Symbol	4	von Willebrand factor C domain containing 2 [Source:MGI Symbol;Acc:MGI:2442987]	0.262806	0.246217	0.858295	0.394583	0.999227	-5.3554
ENSMUSG00000020770	Unk	protein_coding	MGI Symbol	7	unkempt family zinc finger [Source:MGI Symbol;Acc:MGI:2442456]	-0.199117	3.32179	-1.52691	0.132713	0.999227	-5.35592
ENSMUSG00000021720	Rnf180	protein_coding	MGI Symbol	5	ring finger protein 180 [Source:MGI Symbol;Acc:MGI:1919066]	0.183873	4.43908	1.6187	0.111431	0.999227	-5.3564
ENSMUSG00000041130	Zfp598	protein_coding	MGI Symbol	3	zinc finger protein 598 [Source:MGI Symbol;Acc:MGI:2670965]	-0.209841	3.29007	-1.51856	0.134799	0.999227	-5.3567
ENSMUSG00000028441	1110017D15Rik	protein_coding	MGI Symbol	8	RIKEN cDNA 1110017D15 gene [Source:MGI Symbol;Acc:MGI:1920971]	-0.319874	2.28323	-1.38045	0.173224	0.999227	-5.3567
ENSMUSG00000041187	Prkd2	protein_coding	MGI Symbol	8	protein kinase D2 [Source:MGI Symbol;Acc:MGI:2141917]	0.284635	0.916867	1.04538	0.300577	0.999227	-5.35693
ENSMUSG00000105987	AI506816	processed_transcript	MGI Symbol	5	expressed sequence AI506816 [Source:MGI Symbol;Acc:MGI:2140929]	0.32481	0.297897	0.905874	0.36909	0.999227	-5.35697
ENSMUSG00000036834	Plch1	protein_coding	MGI Symbol	13	phospholipase C, eta 1 [Source:MGI Symbol;Acc:MGI:2683547]	-0.306003	1.30744	-1.21791	0.228638	0.999227	-5.3572
ENSMUSG00000075227	Znhit2	protein_coding	MGI Symbol	1	zinc finger, HIT domain containing 2 [Source:MGI Symbol;Acc:MGI:1352481]	-0.613329	3.52684	-1.60221	0.115035	0.999227	-5.35726
ENSMUSG00000106678	Gm43457	TEC	MGI Symbol	1	predicted gene 43457 [Source:MGI Symbol;Acc:MGI:5663594]	0.262204	0.608327	0.966875	0.337985	0.999227	-5.35731
ENSMUSG00000085072	Ict1os	antisense	MGI Symbol	1	immature colon carcinoma transcript 1, opposite strand [Source:MGI Symbol;Acc:MGI:2441927]	0.33646	-0.660596	0.707099	0.482593	0.999227	-5.35731
ENSMUSG00000029843	Slc13a4	protein_coding	MGI Symbol	3	solute carrier family 13 (sodium/sulfate symporters), member 4 [Source:MGI Symbol;Acc:MGI:2442367]	-0.600271	1.55998	-1.30281	0.198254	0.999227	-5.35762
ENSMUSG00000024887	Asah2	protein_coding	MGI Symbol	10	N-acylsphingosine amidohydrolase 2 [Source:MGI Symbol;Acc:MGI:1859310]	-0.252307	1.40978	-1.23205	0.223351	0.999227	-5.35825
ENSMUSG00000114680	Gm47202	lincRNA	MGI Symbol	1	predicted gene, 47202 [Source:MGI Symbol;Acc:MGI:6096000]	0.275691	-0.449153	0.639294	0.525377	0.999227	-5.35845
ENSMUSG00000038173	Enpp6	protein_coding	MGI Symbol	6	ectonucleotide pyrophosphatase/phosphodiesterase 6 [Source:MGI Symbol;Acc:MGI:2445171]	-0.298028	2.94952	-1.46823	0.147934	0.999227	-5.35861
ENSMUSG00000027080	Med19	protein_coding	MGI Symbol	2	mediator complex subunit 19 [Source:MGI Symbol;Acc:MGI:1914234]	-0.0995968	5.41094	-1.72533	0.0902785	0.999227	-5.3587
ENSMUSG00000032478	Nme6	protein_coding	MGI Symbol	15	NME/NM23 nucleoside diphosphate kinase 6 [Source:MGI Symbol;Acc:MGI:1861676]	0.175196	3.57458	1.51464	0.135787	0.999227	-5.35946
ENSMUSG00000033439	Trmt13	protein_coding	MGI Symbol	11	tRNA methyltransferase 13 [Source:MGI Symbol;Acc:MGI:1925219]	0.182529	2.56312	1.36801	0.177063	0.999227	-5.35947
ENSMUSG00000022971	Ifnar2	protein_coding	MGI Symbol	5	interferon (alpha and beta) receptor 2 [Source:MGI Symbol;Acc:MGI:1098243]	-0.375902	2.76796	-1.47637	0.145744	0.999227	-5.35979
ENSMUSG00000068196	Col8a1	protein_coding	MGI Symbol	2	collagen, type VIII, alpha 1 [Source:MGI Symbol;Acc:MGI:88463]	-0.662729	-0.94333	-0.796985	0.429005	0.999227	-5.35985
ENSMUSG00000030745	Il21r	protein_coding	MGI Symbol	3	interleukin 21 receptor [Source:MGI Symbol;Acc:MGI:1890475]	-0.271426	-0.239176	-0.862194	0.392454	0.999227	-5.35994
ENSMUSG00000033152	Podxl2	protein_coding	MGI Symbol	12	podocalyxin-like 2 [Source:MGI Symbol;Acc:MGI:2442488]	0.257642	-0.310797	0.727252	0.470262	0.999227	-5.35998
ENSMUSG00000031986	Sprtn	protein_coding	MGI Symbol	2	SprT-like N-terminal domain [Source:MGI Symbol;Acc:MGI:2685351]	0.218777	2.91576	1.42652	0.159565	0.999227	-5.36059
ENSMUSG00000018900	Slc22a5	protein_coding	MGI Symbol	3	solute carrier family 22 (organic cation transporter), member 5 [Source:MGI Symbol;Acc:MGI:1329012]	-0.240986	2.30651	-1.38759	0.171052	0.999227	-5.36074
ENSMUSG00000040364	Sec1	protein_coding	MGI Symbol	1	secretory blood group 1 [Source:MGI Symbol;Acc:MGI:1928893]	0.312802	-0.60333	0.63165	0.530323	0.999227	-5.36075
ENSMUSG00000020884	Asgr1	protein_coding	MGI Symbol	5	asialoglycoprotein receptor 1 [Source:MGI Symbol;Acc:MGI:88081]	-0.48251	-0.21797	-0.905944	0.369054	0.999227	-5.3609
ENSMUSG00000018983	E2f2	protein_coding	MGI Symbol	2	E2F transcription factor 2 [Source:MGI Symbol;Acc:MGI:1096341]	0.31535	0.565802	1.00787	0.318083	0.999227	-5.36137
ENSMUSG00000034333	Zbed4	protein_coding	MGI Symbol	2	zinc finger, BED type containing 4 [Source:MGI Symbol;Acc:MGI:2682302]	0.237819	1.59173	1.19064	0.239084	0.999227	-5.36137
ENSMUSG00000028347	Tmeff1	protein_coding	MGI Symbol	4	transmembrane protein with EGF-like and two follistatin-like domains 1 [Source:MGI Symbol;Acc:MGI:1926810]	-0.15568	5.41859	-1.72118	0.0910349	0.999227	-5.36139
ENSMUSG00000028497	Hacd4	protein_coding	MGI Symbol	3	3-hydroxyacyl-CoA dehydratase 4 [Source:MGI Symbol;Acc:MGI:1914025]	-0.274425	0.762407	-1.08438	0.283089	0.999227	-5.36141
ENSMUSG00000043157	Arl11	protein_coding	MGI Symbol	2	ADP-ribosylation factor-like 11 [Source:MGI Symbol;Acc:MGI:2444054]	0.311671	-0.190019	0.807297	0.423093	0.999227	-5.36183
ENSMUSG00000044468	Tent5c	protein_coding	MGI Symbol	3	terminal nucleotidyltransferase 5C [Source:MGI Symbol;Acc:MGI:1921895]	-0.340298	1.325	-1.22158	0.227258	0.999227	-5.36188
ENSMUSG00000115912	Gm35569	lincRNA	MGI Symbol	1	predicted gene, 35569 [Source:MGI Symbol;Acc:MGI:5594728]	0.224225	-0.126751	0.786118	0.435289	0.999227	-5.36216
ENSMUSG00000020420	Zfp607a	protein_coding	MGI Symbol	3	zinc finger protein 607A [Source:MGI Symbol;Acc:MGI:3584526]	-0.26025	-0.147087	-0.872645	0.386781	0.999227	-5.36242
ENSMUSG00000103646	Gm37706	TEC	MGI Symbol	1	predicted gene, 37706 [Source:MGI Symbol;Acc:MGI:5610934]	0.367903	-0.505688	0.653506	0.516247	0.999227	-5.36307
ENSMUSG00000070327	Rnf213	protein_coding	MGI Symbol	3	ring finger protein 213 [Source:MGI Symbol;Acc:MGI:1289196]	-0.258851	1.10767	-1.14831	0.255981	0.999227	-5.36317
ENSMUSG00000019080	Mfsd3	protein_coding	MGI Symbol	4	major facilitator superfamily domain containing 3 [Source:MGI Symbol;Acc:MGI:1916822]	-0.221789	3.00979	-1.47005	0.147442	0.999227	-5.36344
ENSMUSG00000032271	Nnmt	protein_coding	MGI Symbol	5	nicotinamide N-methyltransferase [Source:MGI Symbol;Acc:MGI:1099443]	0.270696	0.0492478	0.845136	0.401823	0.999227	-5.36405
ENSMUSG00000086034	Gm15201	processed_transcript	MGI Symbol	1	predicted gene 15201 [Source:MGI Symbol;Acc:MGI:3705207]	-0.270906	0.42499	-1.02801	0.308601	0.999227	-5.36416
ENSMUSG00000041700	Lhfpl1	protein_coding	MGI Symbol	2	lipoma HMGIC fusion partner-like 1 [Source:MGI Symbol;Acc:MGI:1891214]	0.236952	0.152997	0.826614	0.412151	0.999227	-5.36451
ENSMUSG00000026791	Slc2a8	protein_coding	MGI Symbol	8	solute carrier family 2, (facilitated glucose transporter), member 8 [Source:MGI Symbol;Acc:MGI:1860103]	-0.398214	2.86272	-1.47168	0.147004	0.999227	-5.36456
ENSMUSG00000005980	Dnase1	protein_coding	MGI Symbol	11	deoxyribonuclease I [Source:MGI Symbol;Acc:MGI:103157]	0.283855	0.423778	0.938664	0.352149	0.999227	-5.36484
ENSMUSG00000094685	Gm5900	processed_pseudogene	MGI Symbol	1	predicted pseudogene 5900 [Source:MGI Symbol;Acc:MGI:3643907]	0.244958	1.61524	1.20679	0.232856	0.999227	-5.365
ENSMUSG00000074480	Mex3a	protein_coding	MGI Symbol	1	mex3 RNA binding family member A [Source:MGI Symbol;Acc:MGI:1919890]	0.213604	2.18456	1.27974	0.206193	0.999227	-5.36515
ENSMUSG00000036908	Unc93b1	protein_coding	MGI Symbol	7	unc-93 homolog B1, TLR signaling regulator [Source:MGI Symbol;Acc:MGI:1859307]	-0.204895	3.28649	-1.50671	0.137806	0.999227	-5.3652
ENSMUSG00000020812	Snhg16	antisense	MGI Symbol	14	small nucleolar RNA host gene 16 [Source:MGI Symbol;Acc:MGI:1913543]	-0.21834	2.19809	-1.34693	0.183716	0.999227	-5.36536
ENSMUSG00000109783	Gm45338	processed_transcript	MGI Symbol	7	predicted gene 45338 [Source:MGI Symbol;Acc:MGI:5791174]	0.279445	0.189308	0.862493	0.392291	0.999227	-5.36552
ENSMUSG00000025130	P4hb	protein_coding	MGI Symbol	3	prolyl 4-hydroxylase, beta polypeptide [Source:MGI Symbol;Acc:MGI:97464]	-0.189604	5.82061	-1.74285	0.0871425	0.999227	-5.36593
ENSMUSG00000027615	Hps3	protein_coding	MGI Symbol	11	HPS3, biogenesis of lysosomal organelles complex 2 subunit 1 [Source:MGI Symbol;Acc:MGI:2153839]	-0.208926	3.41173	-1.52634	0.132853	0.999227	-5.3665
ENSMUSG00000109574	B230206I08Rik	TEC	MGI Symbol	1	RIKEN cDNA B230206I08 gene [Source:MGI Symbol;Acc:MGI:1926094]	-0.400172	-0.566788	-0.634628	0.528393	0.999227	-5.36657
ENSMUSG00000040594	Ranbp17	protein_coding	MGI Symbol	6	RAN binding protein 17 [Source:MGI Symbol;Acc:MGI:1929706]	-0.218149	1.91269	-1.30994	0.195851	0.999227	-5.36703
ENSMUSG00000084808	9430091E24Rik	processed_transcript	MGI Symbol	2	RIKEN cDNA 9430091E24 gene [Source:MGI Symbol;Acc:MGI:1924618]	0.316987	0.158046	0.890675	0.377117	0.999227	-5.36722
ENSMUSG00000030263	Lrmp	protein_coding	MGI Symbol	10	lymphoid-restricted membrane protein [Source:MGI Symbol;Acc:MGI:108424]	0.240594	1.46578	1.19552	0.23719	0.999227	-5.36741
ENSMUSG00000032637	Atxn2l	protein_coding	MGI Symbol	6	ataxin 2-like [Source:MGI Symbol;Acc:MGI:2446242]	-0.174296	4.99498	-1.69613	0.0957103	0.999227	-5.36774
ENSMUSG00000107008	Gm2762	lincRNA	MGI Symbol	8	predicted gene 2762 [Source:MGI Symbol;Acc:MGI:3780931]	0.223658	1.67049	1.20348	0.234124	0.999227	-5.36778
ENSMUSG00000039199	Zdhhc1	protein_coding	MGI Symbol	4	zinc finger, DHHC domain containing 1 [Source:MGI Symbol;Acc:MGI:1918046]	-0.394098	3.08283	-1.5092	0.137169	0.999227	-5.36836
ENSMUSG00000026047	Poglut2	protein_coding	MGI Symbol	5	protein O-glucosyltransferase 2 [Source:MGI Symbol;Acc:MGI:1919300]	0.268838	1.80918	1.21633	0.229233	0.999227	-5.36862
ENSMUSG00000028747	Htr6	protein_coding	MGI Symbol	2	5-hydroxytryptamine (serotonin) receptor 6 [Source:MGI Symbol;Acc:MGI:1196627]	-0.316701	-0.420815	-0.810787	0.421103	0.999227	-5.36934
ENSMUSG00000081729	Hspa9-ps1	processed_pseudogene	MGI Symbol	1	heat shock protein 9, pseudogene 1 [Source:MGI Symbol;Acc:MGI:96246]	-0.248848	0.198344	-0.974997	0.333978	0.999227	-5.37014
ENSMUSG00000044461	Shisa2	protein_coding	MGI Symbol	2	shisa family member 2 [Source:MGI Symbol;Acc:MGI:2444716]	-0.234042	1.61462	-1.27363	0.208334	0.999227	-5.37017
ENSMUSG00000019647	Sema6a	protein_coding	MGI Symbol	10	sema domain, transmembrane domain (TM), and cytoplasmic domain, (semaphorin) 6A [Source:MGI Symbol;Acc:MGI:1203727]	-0.238973	3.78934	-1.56398	0.123757	0.999227	-5.37032
ENSMUSG00000046546	Fam43a	protein_coding	MGI Symbol	1	family with sequence similarity 43, member A [Source:MGI Symbol;Acc:MGI:2676309]	-0.288245	2.2338	-1.3771	0.174254	0.999227	-5.37052
ENSMUSG00000106791	4930553P18Rik	lincRNA	MGI Symbol	1	RIKEN cDNA 4930553P18 gene [Source:MGI Symbol;Acc:MGI:1922605]	0.276076	-0.143476	0.749806	0.456677	0.999227	-5.37085
ENSMUSG00000022262	Dnah5	protein_coding	MGI Symbol	1	dynein, axonemal, heavy chain 5 [Source:MGI Symbol;Acc:MGI:107718]	-0.24516	0.917467	-1.09457	0.278642	0.999227	-5.37092
ENSMUSG00000106375	Gm43361	TEC	MGI Symbol	1	predicted gene 43361 [Source:MGI Symbol;Acc:MGI:5663498]	0.391738	-0.181465	0.750884	0.456034	0.999227	-5.3711
ENSMUSG00000010797	Wnt2	protein_coding	MGI Symbol	1	wingless-type MMTV integration site family, member 2 [Source:MGI Symbol;Acc:MGI:98954]	-0.216737	3.63967	-1.5388	0.129785	0.999227	-5.37118
ENSMUSG00000097028	Ptgs2os	processed_transcript	MGI Symbol	2	prostaglandin-endoperoxide synthase 2, opposite strand [Source:MGI Symbol;Acc:MGI:2443180]	0.237631	0.722206	1.02113	0.311817	0.999227	-5.3717
ENSMUSG00000103092	Pcdha5	protein_coding	MGI Symbol	1	protocadherin alpha 5 [Source:MGI Symbol;Acc:MGI:1298371]	-0.250033	0.461167	-1.01164	0.316295	0.999227	-5.37241
ENSMUSG00000103945	Gm38228	TEC	MGI Symbol	1	predicted gene, 38228 [Source:MGI Symbol;Acc:MGI:5611456]	0.304397	-0.825009	0.565705	0.573974	0.999227	-5.37321
ENSMUSG00000074646	6430550D23Rik	protein_coding	MGI Symbol	9	RIKEN cDNA 6430550D23 gene [Source:MGI Symbol;Acc:MGI:2443361]	-0.300145	-0.0568703	-0.912925	0.365404	0.999227	-5.37327
ENSMUSG00000036972	Zic4	protein_coding	MGI Symbol	12	zinc finger protein of the cerebellum 4 [Source:MGI Symbol;Acc:MGI:107201]	-0.395514	1.48543	-1.23892	0.220817	0.999227	-5.3738
ENSMUSG00000036131	Frmd7	protein_coding	MGI Symbol	2	FERM domain containing 7 [Source:MGI Symbol;Acc:MGI:2686379]	0.314647	0.177805	0.854008	0.396933	0.999227	-5.37387
ENSMUSG00000086401	Gm15559	antisense	MGI Symbol	1	predicted gene 15559 [Source:MGI Symbol;Acc:MGI:3783008]	-0.257167	0.680972	-1.05017	0.298392	0.999227	-5.37411
ENSMUSG00000097801	Gm26777	bidirectional_promoter_lncRNA	MGI Symbol	1	predicted gene, 26777 [Source:MGI Symbol;Acc:MGI:5477271]	0.192018	2.20558	1.28521	0.204291	0.999227	-5.37458
ENSMUSG00000103567	Pcdhga5	protein_coding	MGI Symbol	1	protocadherin gamma subfamily A, 5 [Source:MGI Symbol;Acc:MGI:1935217]	-0.295823	0.159131	-0.905613	0.369227	0.999227	-5.37459
ENSMUSG00000052915	Msl1	protein_coding	MGI Symbol	6	male specific lethal 1 [Source:MGI Symbol;Acc:MGI:1921276]	0.143135	6.69267	1.7584	0.0844356	0.999227	-5.37485
ENSMUSG00000110529	Gm45694	TEC	MGI Symbol	1	predicted gene 45694 [Source:MGI Symbol;Acc:MGI:5804809]	0.275004	0.00382209	0.800492	0.426989	0.999227	-5.3749
ENSMUSG00000103041	Gm37305	antisense	MGI Symbol	1	predicted gene, 37305 [Source:MGI Symbol;Acc:MGI:5610533]	-0.218678	1.29412	-1.18858	0.239889	0.999227	-5.37576
ENSMUSG00000041117	Ccdc8	protein_coding	MGI Symbol	1	coiled-coil domain containing 8 [Source:MGI Symbol;Acc:MGI:3612184]	0.27673	0.156838	0.897453	0.373524	0.999227	-5.37618
ENSMUSG00000035513	Ntng2	protein_coding	MGI Symbol	11	netrin G2 [Source:MGI Symbol;Acc:MGI:2159341]	-0.275156	-0.181928	-0.843573	0.402688	0.999227	-5.37631
ENSMUSG00000116298	4833412C15Rik	TEC	MGI Symbol	1	RIKEN cDNA 4833412C15 gene [Source:MGI Symbol;Acc:MGI:1921863]	0.274928	-0.660498	0.544201	0.588578	0.999227	-5.37637
ENSMUSG00000021120	Pigh	protein_coding	MGI Symbol	3	phosphatidylinositol glycan anchor biosynthesis, class H [Source:MGI Symbol;Acc:MGI:99463]	0.190346	2.7554	1.39187	0.169759	0.999227	-5.37646
ENSMUSG00000108477	Gm44878	TEC	MGI Symbol	1	predicted gene 44878 [Source:MGI Symbol;Acc:MGI:5753454]	-0.362131	-0.781962	-0.760937	0.450057	0.999227	-5.37695
ENSMUSG00000050288	Fzd2	protein_coding	MGI Symbol	1	frizzled class receptor 2 [Source:MGI Symbol;Acc:MGI:1888513]	-0.239761	1.46767	-1.24081	0.220123	0.999227	-5.3771
ENSMUSG00000039137	Whrn	protein_coding	MGI Symbol	17	whirlin [Source:MGI Symbol;Acc:MGI:2682003]	-0.287263	2.53434	-1.40438	0.166023	0.999227	-5.37714
ENSMUSG00000082394	Gm4596	processed_pseudogene	MGI Symbol	1	predicted gene 4596 [Source:MGI Symbol;Acc:MGI:3782779]	-0.269979	-0.580804	-0.755562	0.453247	0.999227	-5.37764
ENSMUSG00000035759	Bbs10	protein_coding	MGI Symbol	2	Bardet-Biedl syndrome 10 (human) [Source:MGI Symbol;Acc:MGI:1919019]	0.230559	2.00093	1.25968	0.213287	0.999227	-5.37786
ENSMUSG00000001103	Sebox	protein_coding	MGI Symbol	2	SEBOX homeobox [Source:MGI Symbol;Acc:MGI:108012]	0.156349	4.28791	1.59347	0.116983	0.999227	-5.37811
ENSMUSG00000032394	Igdcc3	protein_coding	MGI Symbol	3	immunoglobulin superfamily, DCC subclass, member 3 [Source:MGI Symbol;Acc:MGI:1202390]	-0.273355	0.862357	-1.08087	0.284635	0.999227	-5.37838
ENSMUSG00000025375	Aatk	protein_coding	MGI Symbol	9	apoptosis-associated tyrosine kinase [Source:MGI Symbol;Acc:MGI:1197518]	-0.229874	6.11472	-1.74824	0.0861958	0.999227	-5.37844
ENSMUSG00000020828	Pld2	protein_coding	MGI Symbol	7	phospholipase D2 [Source:MGI Symbol;Acc:MGI:892877]	-0.153347	3.25738	-1.49804	0.140039	0.999227	-5.3791
ENSMUSG00000051727	Kctd14	protein_coding	MGI Symbol	6	potassium channel tetramerisation domain containing 14 [Source:MGI Symbol;Acc:MGI:1289222]	0.246753	2.19838	1.30746	0.196684	0.999227	-5.3801
ENSMUSG00000098198	Gm9169	processed_pseudogene	MGI Symbol	1	predicted gene 9169 [Source:MGI Symbol;Acc:MGI:3648561]	-0.212259	1.39939	-1.21056	0.231417	0.999227	-5.38013
ENSMUSG00000038002	Cramp1l	protein_coding	MGI Symbol	3	cramped chromatin regulator homolog 1 [Source:MGI Symbol;Acc:MGI:1930190]	0.185617	4.30122	1.58951	0.117876	0.999227	-5.3803
ENSMUSG00000097746	Gm6225	processed_transcript	MGI Symbol	2	predicted gene 6225 [Source:MGI Symbol;Acc:MGI:3643252]	0.277939	-0.177784	0.762352	0.449219	0.999227	-5.38068
ENSMUSG00000025747	Tyms	protein_coding	MGI Symbol	9	thymidylate synthase [Source:MGI Symbol;Acc:MGI:98878]	0.205509	2.70945	1.38125	0.172982	0.999227	-5.38078
ENSMUSG00000030748	Il4ra	protein_coding	MGI Symbol	5	interleukin 4 receptor, alpha [Source:MGI Symbol;Acc:MGI:105367]	0.273603	0.327483	0.899975	0.372193	0.999227	-5.38096
ENSMUSG00000109599	Gm31812	lincRNA	MGI Symbol	1	predicted gene, 31812 [Source:MGI Symbol;Acc:MGI:5590971]	-0.26939	-0.100117	-0.874841	0.385596	0.999227	-5.38131
ENSMUSG00000104868	Gm9954	TEC	MGI Symbol	2	predicted gene 9954 [Source:MGI Symbol;Acc:MGI:3642120]	0.238508	1.35951	1.13596	0.261069	0.999227	-5.38229
ENSMUSG00000022120	Rnf219	protein_coding	MGI Symbol	4	ring finger protein 219 [Source:MGI Symbol;Acc:MGI:1919736]	0.136233	4.19577	1.57802	0.120493	0.999227	-5.38311
ENSMUSG00000053783	1700016K19Rik	protein_coding	MGI Symbol	1	RIKEN cDNA 1700016K19 gene [Source:MGI Symbol;Acc:MGI:1921480]	-0.261356	0.53383	-1.03665	0.304591	0.999227	-5.384
ENSMUSG00000051118	Olfr77	protein_coding	MGI Symbol	2	olfactory receptor 77 [Source:MGI Symbol;Acc:MGI:2153206]	0.188755	-0.0139762	0.80522	0.42428	0.999227	-5.38409
ENSMUSG00000069114	Zbtb10	protein_coding	MGI Symbol	1	zinc finger and BTB domain containing 10 [Source:MGI Symbol;Acc:MGI:2139883]	0.246261	2.12926	1.26978	0.209694	0.999227	-5.38415
ENSMUSG00000005373	Mlxipl	protein_coding	MGI Symbol	10	MLX interacting protein-like [Source:MGI Symbol;Acc:MGI:1927999]	0.295146	0.290371	0.883515	0.380937	0.999227	-5.38424
ENSMUSG00000064264	Zfp428	protein_coding	MGI Symbol	4	zinc finger protein 428 [Source:MGI Symbol;Acc:MGI:1916463]	-0.296603	3.74635	-1.57451	0.121302	0.999227	-5.38476
ENSMUSG00000074221	Zfp568	protein_coding	MGI Symbol	6	zinc finger protein 568 [Source:MGI Symbol;Acc:MGI:2142347]	0.297753	0.442064	0.858005	0.394742	0.999227	-5.38495
ENSMUSG00000025727	A930017K11Rik	protein_coding	MGI Symbol	1	RIKEN cDNA A930017K11 gene [Source:MGI Symbol;Acc:MGI:2442713]	-0.321451	0.693201	-1.06758	0.290536	0.999227	-5.38501
ENSMUSG00000026579	F5	protein_coding	MGI Symbol	1	coagulation factor V [Source:MGI Symbol;Acc:MGI:88382]	-0.652683	0.312661	-1.06613	0.291182	0.999227	-5.38509
ENSMUSG00000048782	Insc	protein_coding	MGI Symbol	9	INSC spindle orientation adaptor protein [Source:MGI Symbol;Acc:MGI:1917942]	-0.278941	2.28052	-1.36673	0.177462	0.999227	-5.38545
ENSMUSG00000023048	Prr13	protein_coding	MGI Symbol	5	proline rich 13 [Source:MGI Symbol;Acc:MGI:1913401]	0.160194	7.09518	1.76007	0.0841489	0.999227	-5.38562
ENSMUSG00000113621	2900060N12Rik	bidirectional_promoter_lncRNA	MGI Symbol	2	RIKEN cDNA 2900060N12 gene [Source:MGI Symbol;Acc:MGI:1920281]	0.229478	2.16215	1.27695	0.207169	0.999227	-5.38569
ENSMUSG00000032017	Grik4	protein_coding	MGI Symbol	2	glutamate receptor, ionotropic, kainate 4 [Source:MGI Symbol;Acc:MGI:95817]	-0.386263	3.32996	-1.5026	0.138861	0.999227	-5.38615
ENSMUSG00000033722	BC034090	protein_coding	MGI Symbol	9	cDNA sequence BC034090 [Source:MGI Symbol;Acc:MGI:2672904]	-0.294885	1.57008	-1.24228	0.219586	0.999227	-5.38645
ENSMUSG00000032657	Fam189b	protein_coding	MGI Symbol	10	family with sequence similarity 189, member B [Source:MGI Symbol;Acc:MGI:1915771]	-0.202616	4.52742	-1.63874	0.107173	0.999227	-5.3866
ENSMUSG00000087470	A630031M04Rik	lincRNA	MGI Symbol	6	RIKEN cDNA A630031M04 gene [Source:MGI Symbol;Acc:MGI:2444470]	0.271343	-0.450287	0.64219	0.52351	0.999227	-5.38662
ENSMUSG00000029798	Herc6	protein_coding	MGI Symbol	6	hect domain and RLD 6 [Source:MGI Symbol;Acc:MGI:1914388]	0.22745	0.655988	0.945743	0.348559	0.999227	-5.38681
ENSMUSG00000107966	Gm44001	TEC	MGI Symbol	1	predicted gene, 44001 [Source:MGI Symbol;Acc:MGI:5690393]	0.305287	-0.741094	0.477604	0.63489	0.999227	-5.38704
ENSMUSG00000029123	Stk32b	protein_coding	MGI Symbol	1	serine/threonine kinase 32B [Source:MGI Symbol;Acc:MGI:1927552]	0.228424	2.07285	1.2475	0.217681	0.999227	-5.38724
ENSMUSG00000051950	B3glct	protein_coding	MGI Symbol	3	beta-3-glucosyltransferase [Source:MGI Symbol;Acc:MGI:2685903]	-0.191803	2.76669	-1.41761	0.16214	0.999227	-5.38724
ENSMUSG00000043903	Zfp469	protein_coding	MGI Symbol	2	zinc finger protein 469 [Source:MGI Symbol;Acc:MGI:2684868]	0.276115	-0.513136	0.65803	0.513359	0.999227	-5.38735
ENSMUSG00000029675	Eln	protein_coding	MGI Symbol	5	elastin [Source:MGI Symbol;Acc:MGI:95317]	0.27541	-0.573081	0.479771	0.633358	0.999227	-5.38784
ENSMUSG00000039477	Tnrc18	protein_coding	MGI Symbol	7	trinucleotide repeat containing 18 [Source:MGI Symbol;Acc:MGI:3648294]	-0.222267	3.78584	-1.56029	0.124625	0.999227	-5.38812
ENSMUSG00000063328	Gm9396	processed_pseudogene	MGI Symbol	1	predicted gene 9396 [Source:MGI Symbol;Acc:MGI:3645563]	0.232836	1.59156	1.18687	0.240556	0.999227	-5.38853
ENSMUSG00000075514	Gm13375	antisense	MGI Symbol	1	predicted gene 13375 [Source:MGI Symbol;Acc:MGI:3649913]	-0.237162	2.25582	-1.35581	0.180891	0.999227	-5.38857
ENSMUSG00000040812	Agbl2	protein_coding	MGI Symbol	8	ATP/GTP binding protein-like 2 [Source:MGI Symbol;Acc:MGI:2443254]	-0.311741	1.02632	-1.15955	0.251414	0.999227	-5.38907
ENSMUSG00000107990	Gm7890	processed_pseudogene	MGI Symbol	1	predicted gene 7890 [Source:MGI Symbol;Acc:MGI:3645227]	0.294933	-0.366468	0.70383	0.48461	0.999227	-5.3893
ENSMUSG00000082939	Gm14881	processed_pseudogene	MGI Symbol	1	predicted gene 14881 [Source:MGI Symbol;Acc:MGI:3705701]	0.22766	0.042925	0.824254	0.413478	0.999227	-5.38948
ENSMUSG00000038257	Glra3	protein_coding	MGI Symbol	3	glycine receptor, alpha 3 subunit [Source:MGI Symbol;Acc:MGI:95749]	-0.28926	0.0404363	-0.944899	0.348986	0.999227	-5.39018
ENSMUSG00000038070	Cntln	protein_coding	MGI Symbol	4	centlein, centrosomal protein [Source:MGI Symbol;Acc:MGI:2443104]	-0.165638	3.02144	-1.45676	0.151066	0.999227	-5.39019
ENSMUSG00000101316	Gm12663	processed_pseudogene	MGI Symbol	1	predicted gene 12663 [Source:MGI Symbol;Acc:MGI:3652168]	0.241488	0.967767	1.03438	0.30564	0.999227	-5.39048
ENSMUSG00000057130	Txnl4a	protein_coding	MGI Symbol	4	thioredoxin-like 4A [Source:MGI Symbol;Acc:MGI:1351613]	0.146192	5.55412	1.69934	0.0951011	0.999227	-5.39052
ENSMUSG00000032777	Gtf3c1	protein_coding	MGI Symbol	10	general transcription factor III C 1 [Source:MGI Symbol;Acc:MGI:107887]	0.14881	5.79131	1.71005	0.0930888	0.999227	-5.39064
ENSMUSG00000038987	Cfap157	protein_coding	MGI Symbol	2	cilia and flagella associated protein 157 [Source:MGI Symbol;Acc:MGI:2447809]	0.211073	0.582369	0.926601	0.358321	0.999227	-5.39069
ENSMUSG00000043556	Fbxl7	protein_coding	MGI Symbol	2	F-box and leucine-rich repeat protein 7 [Source:MGI Symbol;Acc:MGI:3052506]	-0.317949	0.570802	-1.04994	0.298493	0.999227	-5.39087
ENSMUSG00000031438	Rnf128	protein_coding	MGI Symbol	3	ring finger protein 128 [Source:MGI Symbol;Acc:MGI:1914139]	-0.265689	3.48856	-1.52057	0.134295	0.999227	-5.39094
ENSMUSG00000022040	Ephx2	protein_coding	MGI Symbol	3	epoxide hydrolase 2, cytoplasmic [Source:MGI Symbol;Acc:MGI:99500]	0.15473	4.81912	1.63829	0.107268	0.999227	-5.39108
ENSMUSG00000069917	Hba-a2	protein_coding	MGI Symbol	2	hemoglobin alpha, adult chain 2 [Source:MGI Symbol;Acc:MGI:96016]	-0.437514	5.77293	-1.73056	0.0893314	0.999227	-5.39111
ENSMUSG00000105993	Tex13c2	protein_coding	MGI Symbol	1	TEX13 family member C2 [Source:MGI Symbol;Acc:MGI:5663474]	0.225605	1.4719	1.13682	0.26071	0.999227	-5.39116
ENSMUSG00000070524	Fcrlb	protein_coding	MGI Symbol	1	Fc receptor-like B [Source:MGI Symbol;Acc:MGI:3576487]	-0.292292	-0.188014	-0.88897	0.378025	0.999227	-5.39142
ENSMUSG00000052031	Tagap1	protein_coding	MGI Symbol	1	T cell activation GTPase activating protein 1 [Source:MGI Symbol;Acc:MGI:1919786]	0.124423	5.28897	1.68287	0.0982658	0.999227	-5.39145
ENSMUSG00000054134	Umodl1	protein_coding	MGI Symbol	6	uromodulin-like 1 [Source:MGI Symbol;Acc:MGI:1929785]	0.242919	-0.311831	0.697185	0.488725	0.999227	-5.39159
ENSMUSG00000029658	Wdr95	protein_coding	MGI Symbol	7	WD40 repeat domain 95 [Source:MGI Symbol;Acc:MGI:1923042]	-0.272712	0.620194	-1.03988	0.303103	0.999227	-5.39174
ENSMUSG00000052301	Doc2a	protein_coding	MGI Symbol	9	double C2, alpha [Source:MGI Symbol;Acc:MGI:109446]	-0.291217	0.950817	-1.11592	0.269477	0.999227	-5.39198
ENSMUSG00000037580	Gch1	protein_coding	MGI Symbol	2	GTP cyclohydrolase 1 [Source:MGI Symbol;Acc:MGI:95675]	-0.245647	-0.528985	-0.702604	0.485368	0.999227	-5.39248
ENSMUSG00000024866	Acy3	protein_coding	MGI Symbol	7	aspartoacylase (aminoacylase) 3 [Source:MGI Symbol;Acc:MGI:1918920]	0.265712	1.55124	1.14847	0.255917	0.999227	-5.39274
ENSMUSG00000068206	Pick1	protein_coding	MGI Symbol	11	protein interacting with C kinase 1 [Source:MGI Symbol;Acc:MGI:894645]	-0.189745	4.25756	-1.61285	0.1127	0.999227	-5.39287
ENSMUSG00000117743	Gm50232	antisense	MGI Symbol	1	predicted gene, 50232 [Source:MGI Symbol;Acc:MGI:6303036]	0.272374	-0.560568	0.583039	0.562332	0.999227	-5.39291
ENSMUSG00000039007	Cpq	protein_coding	MGI Symbol	7	carboxypeptidase Q [Source:MGI Symbol;Acc:MGI:1889205]	-0.287779	2.57514	-1.40581	0.165598	0.999227	-5.39301
ENSMUSG00000001518	Itfg2	protein_coding	MGI Symbol	10	integrin alpha FG-GAP repeat containing 2 [Source:MGI Symbol;Acc:MGI:1915450]	0.149085	4.80459	1.63951	0.107013	0.999227	-5.39306
ENSMUSG00000107201	5930420M18Rik	TEC	MGI Symbol	1	RIKEN cDNA 5930420M18 gene [Source:MGI Symbol;Acc:MGI:2441703]	0.247515	0.145905	0.819225	0.416316	0.999227	-5.39333
ENSMUSG00000049588	Ccdc69	protein_coding	MGI Symbol	2	coiled-coil domain containing 69 [Source:MGI Symbol;Acc:MGI:1196234]	-0.279087	-0.336109	-0.813639	0.419481	0.999227	-5.39341
ENSMUSG00000113919	Gm34466	lincRNA	MGI Symbol	1	predicted gene, 34466 [Source:MGI Symbol;Acc:MGI:5593625]	0.243547	3.66451	1.49349	0.141221	0.999227	-5.39384
ENSMUSG00000057143	Trim12c	protein_coding	MGI Symbol	2	tripartite motif-containing 12C [Source:MGI Symbol;Acc:MGI:4821183]	0.234705	0.467746	0.933789	0.354635	0.999227	-5.39404
ENSMUSG00000104168	Gm38250	antisense	MGI Symbol	2	predicted gene, 38250 [Source:MGI Symbol;Acc:MGI:5611478]	0.260462	0.537067	0.9297	0.356729	0.999227	-5.39408
ENSMUSG00000043257	Pigv	protein_coding	MGI Symbol	3	phosphatidylinositol glycan anchor biosynthesis, class V [Source:MGI Symbol;Acc:MGI:2442480]	-0.194363	2.56121	-1.39598	0.168524	0.999227	-5.39464
ENSMUSG00000076609	Igkc	IG_C_gene	MGI Symbol	1	immunoglobulin kappa constant [Source:MGI Symbol;Acc:MGI:96495]	-0.544249	-0.495612	-0.715476	0.477446	0.999227	-5.39505
ENSMUSG00000098240	Gm4575	processed_pseudogene	MGI Symbol	1	predicted gene 4575 [Source:MGI Symbol;Acc:MGI:3782758]	-0.154569	0.346618	-0.946899	0.347975	0.999227	-5.39512
ENSMUSG00000034612	Chst11	protein_coding	MGI Symbol	1	carbohydrate sulfotransferase 11 [Source:MGI Symbol;Acc:MGI:1927166]	-0.176845	4.66694	-1.64006	0.106899	0.999227	-5.3953
ENSMUSG00000074171	Gm6658	TEC	MGI Symbol	2	predicted gene 6658 [Source:MGI Symbol;Acc:MGI:3645470]	-0.297617	-0.421535	-0.727259	0.470258	0.999227	-5.39534
ENSMUSG00000090119	Gm8185	processed_pseudogene	MGI Symbol	1	predicted gene 8185 [Source:MGI Symbol;Acc:MGI:3643116]	-0.244177	1.0907	-1.11559	0.269613	0.999227	-5.39537
ENSMUSG00000103808	Gm37060	TEC	MGI Symbol	1	predicted gene, 37060 [Source:MGI Symbol;Acc:MGI:5610288]	-0.330049	-0.687669	-0.65766	0.513595	0.999227	-5.39546
ENSMUSG00000031221	Igbp1	protein_coding	MGI Symbol	2	immunoglobulin (CD79A) binding protein 1 [Source:MGI Symbol;Acc:MGI:1346500]	0.133134	5.3391	1.68297	0.0982464	0.999227	-5.39666
ENSMUSG00000028364	Tnc	protein_coding	MGI Symbol	4	tenascin C [Source:MGI Symbol;Acc:MGI:101922]	-0.323985	0.0282852	-0.878714	0.383511	0.999227	-5.3969
[truncated: 14,169 more rows]

## Sheet: 2b WT Met vs WT Male
ensembl_gene_id	external_gene_name	gene_biotype	external_gene_source	transcript_count	description	logFC	AveExpr	t	P.Value	adj.P.Val	B
ENSMUSG00000069045	Ddx3y	protein_coding	MGI Symbol	4	DEAD (Asp-Glu-Ala-Asp) box polypeptide 3, Y-linked [Source:MGI Symbol;Acc:MGI:1349406]	-11.2375	-2.22213	-22.0411	2.0912e-28	3.38105e-24	24.82
ENSMUSG00000056673	Kdm5d	protein_coding	MGI Symbol	9	lysine (K)-specific demethylase 5D [Source:MGI Symbol;Acc:MGI:99780]	-9.25998	-4.22615	-21.6233	5.23255e-28	4.23e-24	24.1962
ENSMUSG00000069049	Eif2s3y	protein_coding	MGI Symbol	6	eukaryotic translation initiation factor 2, subunit 3, structural gene Y-linked [Source:MGI Symbol;Acc:MGI:1349430]	-10.2836	-2.96645	-19.5538	6.11266e-26	3.29431e-22	23.3436
ENSMUSG00000068457	Uty	protein_coding	MGI Symbol	12	ubiquitously transcribed tetratricopeptide repeat gene, Y chromosome [Source:MGI Symbol;Acc:MGI:894810]	-8.19548	-2.74166	-16.1522	3.73123e-22	1.50816e-18	20.4578
ENSMUSG00000086503	Xist	lincRNA	MGI Symbol	2	inactive X specific transcripts [Source:MGI Symbol;Acc:MGI:98974]	4.87885	0.562233	6.88392	6.83934e-09	2.21157e-05	6.10982
ENSMUSG00000037369	Kdm6a	protein_coding	MGI Symbol	10	lysine (K)-specific demethylase 6A [Source:MGI Symbol;Acc:MGI:1095419]	0.544785	4.42784	4.42483	4.82036e-05	0.129893	1.78096
ENSMUSG00000097571	Jpx	lincRNA	MGI Symbol	11	Jpx transcript, Xist activator (non-protein coding) [Source:MGI Symbol;Acc:MGI:2180008]	0.449286	3.52378	4.22516	9.4106e-05	0.209312	1.22553
ENSMUSG00000097023	Mir9-3hg	lincRNA	MGI Symbol	7	Mir9-3 host gene [Source:MGI Symbol;Acc:MGI:2142071]	-0.576257	4.05918	-4.17416	0.000111419	0.209312	1.00098
ENSMUSG00000097451	Rian	processed_transcript	MGI Symbol	69	RNA imprinted and accumulated in nucleus [Source:MGI Symbol;Acc:MGI:1922995]	0.53998	7.03146	4.16061	0.000116514	0.209312	0.762055
ENSMUSG00000043872	Zmym1	protein_coding	MGI Symbol	7	zinc finger, MYM domain containing 1 [Source:MGI Symbol;Acc:MGI:1915560]	0.644535	3.25252	3.94344	0.000236568	0.382483	0.389855
ENSMUSG00000020680	Taf15	protein_coding	MGI Symbol	5	TATA-box binding protein associated factor 15 [Source:MGI Symbol;Acc:MGI:1917689]	0.631596	2.65681	3.73365	0.000461232	0.549145	-0.161483
ENSMUSG00000087174	5530601H04Rik	processed_transcript	MGI Symbol	16	RIKEN cDNA 5530601H04 gene [Source:MGI Symbol;Acc:MGI:1918695]	0.334315	4.95513	3.76404	0.000419155	0.549145	-0.317208
ENSMUSG00000097180	2700038G22Rik	lincRNA	MGI Symbol	2	RIKEN cDNA 2700038G22 gene [Source:MGI Symbol;Acc:MGI:1914444]	0.964989	1.06185	3.58849	0.000724591	0.650844	-0.513217
ENSMUSG00000035150	Eif2s3x	protein_coding	MGI Symbol	3	eukaryotic translation initiation factor 2, subunit 3, structural gene X-linked [Source:MGI Symbol;Acc:MGI:1349431]	0.655272	5.44432	3.70137	0.000510349	0.550088	-0.537845
ENSMUSG00000032803	Cdv3	protein_coding	MGI Symbol	7	carnitine deficiency-associated gene expressed in ventricle 3 [Source:MGI Symbol;Acc:MGI:2448759]	0.685127	6.82274	3.72503	0.000473886	0.549145	-0.56028
ENSMUSG00000000787	Ddx3x	protein_coding	MGI Symbol	5	DEAD/H (Asp-Glu-Ala-Asp/His) box polypeptide 3, X-linked [Source:MGI Symbol;Acc:MGI:103064]	0.310013	7.65043	3.72394	0.000475509	0.549145	-0.587282
ENSMUSG00000024677	Ms4a6b	protein_coding	MGI Symbol	5	membrane-spanning 4-domains, subfamily A, member 6B [Source:MGI Symbol;Acc:MGI:1917024]	-1.41542	-0.0911035	-3.599	0.00070149	0.650844	-0.658219
ENSMUSG00000031549	Ido2	protein_coding	MGI Symbol	4	indoleamine 2,3-dioxygenase 2 [Source:MGI Symbol;Acc:MGI:2142489]	0.746102	1.73467	3.51075	0.000919525	0.707947	-0.721907
ENSMUSG00000054723	Vmac	protein_coding	MGI Symbol	4	vimentin-type intermediate filament associated coiled-coil protein [Source:MGI Symbol;Acc:MGI:2146912]	-0.488536	3.38301	-3.54283	0.000833692	0.707947	-0.796101
ENSMUSG00000079179	Rab10os	antisense	MGI Symbol	7	RAB10, member RAS oncogene family, opposite strand [Source:MGI Symbol;Acc:MGI:1921423]	0.369185	5.33693	3.60452	0.000689633	0.650844	-0.815339
ENSMUSG00000020752	Recql5	protein_coding	MGI Symbol	8	RecQ protein-like 5 [Source:MGI Symbol;Acc:MGI:2156841]	0.457378	4.08887	3.52457	0.000881583	0.707947	-0.916413
ENSMUSG00000025491	Ifitm1	protein_coding	MGI Symbol	3	interferon induced transmembrane protein 1 [Source:MGI Symbol;Acc:MGI:1915963]	-1.5176	0.57669	-3.4316	0.00116876	0.796116	-0.927778
ENSMUSG00000079297	Gm2223	processed_pseudogene	MGI Symbol	1	predicted pseudogene 2223 [Source:MGI Symbol;Acc:MGI:3780393]	1.29486	0.572458	3.41218	0.00123909	0.796116	-1.00406
ENSMUSG00000030051	Aplf	protein_coding	MGI Symbol	4	aprataxin and PNKP like factor [Source:MGI Symbol;Acc:MGI:1919353]	-0.429164	2.22112	-3.37887	0.00136915	0.796116	-1.11872
ENSMUSG00000032089	Il10ra	protein_coding	MGI Symbol	3	interleukin 10 receptor, alpha [Source:MGI Symbol;Acc:MGI:96538]	0.900413	1.36074	3.31393	0.00166071	0.820983	-1.21291
ENSMUSG00000029524	Sirt4	protein_coding	MGI Symbol	6	sirtuin 4 [Source:MGI Symbol;Acc:MGI:1922637]	0.319492	3.93873	3.39151	0.00131833	0.796116	-1.26343
ENSMUSG00000059436	Max	protein_coding	MGI Symbol	7	Max protein [Source:MGI Symbol;Acc:MGI:96921]	0.48948	6.15403	3.47382	0.00102876	0.756048	-1.26348
ENSMUSG00000001964	Emd	protein_coding	MGI Symbol	6	emerin [Source:MGI Symbol;Acc:MGI:108117]	0.755148	4.6772	3.4156	0.00122643	0.796116	-1.27823
ENSMUSG00000019945	Cabcoco1	protein_coding	MGI Symbol	2	ciliary associated calcium binding coiled-coil 1 [Source:MGI Symbol;Acc:MGI:1920537]	-0.677222	2.09286	-3.30378	0.00171132	0.820983	-1.295
ENSMUSG00000030671	Pde3b	protein_coding	MGI Symbol	4	phosphodiesterase 3B, cGMP-inhibited [Source:MGI Symbol;Acc:MGI:1333863]	0.582884	2.35862	3.3056	0.00170214	0.820983	-1.30881
ENSMUSG00000071317	Bves	protein_coding	MGI Symbol	2	blood vessel epicardial substance [Source:MGI Symbol;Acc:MGI:1346013]	0.783492	1.13201	3.22345	0.00216613	0.826753	-1.44453
ENSMUSG00000078919	Dpm1	protein_coding	MGI Symbol	10	dolichol-phosphate (beta-D) mannosyltransferase 1 [Source:MGI Symbol;Acc:MGI:1330239]	0.406655	4.01399	3.33048	0.0015813	0.820983	-1.45122
ENSMUSG00000085894	Gm15832	processed_transcript	MGI Symbol	1	predicted gene 15832 [Source:MGI Symbol;Acc:MGI:3834078]	1.43172	-0.411095	3.26509	0.00191779	0.820983	-1.47408
ENSMUSG00000028965	Tnfrsf9	protein_coding	MGI Symbol	9	tumor necrosis factor receptor superfamily, member 9 [Source:MGI Symbol;Acc:MGI:1101059]	0.79197	1.77592	3.19794	0.00233296	0.826753	-1.52119
ENSMUSG00000029863	Casp2	protein_coding	MGI Symbol	10	caspase 2 [Source:MGI Symbol;Acc:MGI:97295]	0.446323	3.16099	3.25838	0.00195586	0.820983	-1.5219
ENSMUSG00000024914	Drap1	protein_coding	MGI Symbol	10	Dr1 associated protein 1 (negative cofactor 2 alpha) [Source:MGI Symbol;Acc:MGI:1913806]	-0.370992	6.35907	-3.37653	0.00137873	0.796116	-1.5547
ENSMUSG00000054619	Mettl7a1	protein_coding	MGI Symbol	8	methyltransferase like 7A1 [Source:MGI Symbol;Acc:MGI:1916523]	0.784092	4.16115	3.2825	0.0018221	0.820983	-1.57905
ENSMUSG00000036412	Arsi	protein_coding	MGI Symbol	1	arylsulfatase i [Source:MGI Symbol;Acc:MGI:2670959]	1.13312	0.0330592	3.14843	0.00269183	0.857531	-1.63319
ENSMUSG00000102758	Naaladl2	protein_coding	MGI Symbol	4	N-acetylated alpha-linked acidic dipeptidase-like 2 [Source:MGI Symbol;Acc:MGI:2685867]	-1.17276	-0.0995666	-3.13914	0.00276466	0.857531	-1.65721
ENSMUSG00000112763	Gm34304	lincRNA	MGI Symbol	1	predicted gene, 34304 [Source:MGI Symbol;Acc:MGI:5593463]	-0.595538	1.64289	-3.14312	0.00273323	0.857531	-1.67096
ENSMUSG00000017667	Zfp334	protein_coding	MGI Symbol	1	zinc finger protein 334 [Source:MGI Symbol;Acc:MGI:2388656]	0.335466	4.82544	3.27509	0.00186227	0.820983	-1.69613
ENSMUSG00000030276	Ttll3	protein_coding	MGI Symbol	9	tubulin tyrosine ligase-like family, member 3 [Source:MGI Symbol;Acc:MGI:2141418]	0.536925	2.83133	3.17551	0.00248955	0.826753	-1.69695
ENSMUSG00000029725	Ppp1r35	protein_coding	MGI Symbol	4	protein phosphatase 1, regulatory subunit 35 [Source:MGI Symbol;Acc:MGI:1922853]	-0.973518	1.89757	-3.13334	0.00281106	0.857531	-1.72231
ENSMUSG00000033728	Lrrc14	protein_coding	MGI Symbol	10	leucine rich repeat containing 14 [Source:MGI Symbol;Acc:MGI:2445060]	-0.330787	4.88011	-3.2524	0.00199043	0.820983	-1.77892
ENSMUSG00000111160	Gm48855	lincRNA	MGI Symbol	1	predicted gene, 48855 [Source:MGI Symbol;Acc:MGI:6098594]	1.80053	0.25996	3.09001	0.00318186	0.918647	-1.78096
ENSMUSG00000001018	Snapin	protein_coding	MGI Symbol	5	SNAP-associated protein [Source:MGI Symbol;Acc:MGI:1333745]	-0.330009	6.5008	-3.29036	0.00178041	0.820983	-1.79498
ENSMUSG00000008958	Vps72	protein_coding	MGI Symbol	5	vacuolar protein sorting 72 [Source:MGI Symbol;Acc:MGI:1202305]	-0.416789	5.79263	-3.2767	0.00185344	0.820983	-1.79857
ENSMUSG00000023991	Foxp4	protein_coding	MGI Symbol	8	forkhead box P4 [Source:MGI Symbol;Acc:MGI:1921373]	-0.533472	3.81743	-3.18462	0.00242482	0.826753	-1.83771
ENSMUSG00000049401	Ogfr	protein_coding	MGI Symbol	2	opioid growth factor receptor [Source:MGI Symbol;Acc:MGI:1919325]	-0.523339	4.23944	-3.19293	0.00236712	0.826753	-1.86264
ENSMUSG00000020758	Itgb4	protein_coding	MGI Symbol	10	integrin beta 4 [Source:MGI Symbol;Acc:MGI:96613]	-0.662572	2.66625	-3.11672	0.00294826	0.882731	-1.86293
ENSMUSG00000095041	AC149090.1	protein_coding	Clone-based (Ensembl) gene	2		0.555654	6.75919	3.23867	0.00207203	0.820983	-1.93904
ENSMUSG00000078515	Ddi2	protein_coding	MGI Symbol	2	DNA-damage inducible protein 2 [Source:MGI Symbol;Acc:MGI:1917244]	0.32932	6.61719	3.23704	0.00208191	0.820983	-1.94241
ENSMUSG00000020327	Fgf22	protein_coding	MGI Symbol	3	fibroblast growth factor 22 [Source:MGI Symbol;Acc:MGI:1914362]	-0.829992	0.873722	-3.0074	0.00401868	0.997694	-1.96079
ENSMUSG00000026034	Clk1	protein_coding	MGI Symbol	13	CDC-like kinase 1 [Source:MGI Symbol;Acc:MGI:107403]	0.647233	5.5355	3.19546	0.00234982	0.826753	-1.98763
ENSMUSG00000023224	Serping1	protein_coding	MGI Symbol	3	serine (or cysteine) peptidase inhibitor, clade G, member 1 [Source:MGI Symbol;Acc:MGI:894696]	-0.734957	2.49283	-3.03618	0.00370624	0.984865	-1.98839
ENSMUSG00000043013	Onecut1	protein_coding	MGI Symbol	2	one cut domain, family member 1 [Source:MGI Symbol;Acc:MGI:1196423]	-0.941114	-0.173658	-2.98935	0.00422704	0.997694	-1.98909
ENSMUSG00000035342	Lzts2	protein_coding	MGI Symbol	8	leucine zipper, putative tumor suppressor 2 [Source:MGI Symbol;Acc:MGI:2385095]	-0.726304	2.53672	-3.03527	0.00371578	0.984865	-2.04016
ENSMUSG00000036904	Fzd8	protein_coding	MGI Symbol	1	frizzled class receptor 8 [Source:MGI Symbol;Acc:MGI:108460]	-0.95165	0.361294	-2.95777	0.00461606	0.997694	-2.06408
ENSMUSG00000017493	Igfbp4	protein_coding	MGI Symbol	6	insulin-like growth factor binding protein 4 [Source:MGI Symbol;Acc:MGI:96439]	-0.386413	6.63381	-3.19073	0.00238224	0.826753	-2.07647
ENSMUSG00000106212	Gm43112	sense_intronic	MGI Symbol	1	predicted gene 43112 [Source:MGI Symbol;Acc:MGI:5663249]	1.57736	0.160412	2.96162	0.00456688	0.997694	-2.08849
ENSMUSG00000097587	4930578M01Rik	processed_transcript	MGI Symbol	3	RIKEN cDNA 4930578M01 gene [Source:MGI Symbol;Acc:MGI:1923201]	0.559398	3.24202	3.04555	0.00360945	0.984865	-2.09376
ENSMUSG00000104986	1600023N17Rik	TEC	MGI Symbol	1	RIKEN cDNA 1600023N17 gene [Source:MGI Symbol;Acc:MGI:1917038]	-0.804114	0.217241	-2.9386	0.00486813	0.997694	-2.10162
ENSMUSG00000032580	Rbm5	protein_coding	MGI Symbol	24	RNA binding motif protein 5 [Source:MGI Symbol;Acc:MGI:1933204]	0.236216	7.01605	3.17328	0.00250562	0.826753	-2.12798
ENSMUSG00000000120	Ngfr	protein_coding	MGI Symbol	1	nerve growth factor receptor (TNFR superfamily, member 16) [Source:MGI Symbol;Acc:MGI:97323]	-1.14	-0.129755	-2.90348	0.0053635	0.997694	-2.17996
ENSMUSG00000066196	Spag8	protein_coding	MGI Symbol	3	sperm associated antigen 8 [Source:MGI Symbol;Acc:MGI:3056295]	-1.16636	0.23406	-2.89594	0.0054758	0.997694	-2.20029
ENSMUSG00000008028	1700008O03Rik	protein_coding	MGI Symbol	5	RIKEN cDNA 1700008O03 gene [Source:MGI Symbol;Acc:MGI:1916599]	0.85941	0.521656	2.8744	0.00580879	0.997694	-2.24404
ENSMUSG00000115023	Gm48967	TEC	MGI Symbol	1	predicted gene, 48967 [Source:MGI Symbol;Acc:MGI:6118304]	1.74363	-0.629855	2.90504	0.00534056	0.997694	-2.25361
ENSMUSG00000107937	Gm44200	sense_intronic	MGI Symbol	1	predicted gene, 44200 [Source:MGI Symbol;Acc:MGI:5690592]	1.71792	-0.290936	2.87905	0.00573528	0.997694	-2.26074
ENSMUSG00000044626	Liph	protein_coding	MGI Symbol	6	lipase, member H [Source:MGI Symbol;Acc:MGI:2388029]	1.11116	-0.209479	2.87535	0.00579371	0.997694	-2.28913
ENSMUSG00000063179	Pstk	protein_coding	MGI Symbol	11	phosphoseryl-tRNA kinase [Source:MGI Symbol;Acc:MGI:2685945]	-0.373538	4.84343	-3.05659	0.00349855	0.975251	-2.28938
ENSMUSG00000034532	Fbxo16	protein_coding	MGI Symbol	4	F-box protein 16 [Source:MGI Symbol;Acc:MGI:1354706]	0.409266	3.49759	2.96693	0.00449993	0.997694	-2.31225
ENSMUSG00000079434	Neu2	protein_coding	MGI Symbol	7	neuraminidase 2 [Source:MGI Symbol;Acc:MGI:1344417]	-1.1583	0.0743213	-2.83199	0.00651968	0.997694	-2.33815
ENSMUSG00000025656	Arhgef9	protein_coding	MGI Symbol	20	CDC42 guanine nucleotide exchange factor (GEF) 9 [Source:MGI Symbol;Acc:MGI:2442233]	0.198868	7.90987	3.09809	0.00310942	0.914056	-2.34859
ENSMUSG00000060890	Arr3	protein_coding	MGI Symbol	7	arrestin 3, retinal [Source:MGI Symbol;Acc:MGI:2159617]	1.09659	0.305492	2.81914	0.00675039	0.997694	-2.3647
ENSMUSG00000114584	Gm47694	TEC	MGI Symbol	1	predicted gene, 47694 [Source:MGI Symbol;Acc:MGI:6096803]	1.02693	0.0821183	2.81796	0.00677197	0.997694	-2.36835
ENSMUSG00000117674	Gm31087	antisense	MGI Symbol	1	predicted gene, 31087 [Source:MGI Symbol;Acc:MGI:5590246]	0.761719	0.430141	2.81468	0.00683239	0.997694	-2.37301
ENSMUSG00000029070	Mxra8	protein_coding	MGI Symbol	7	matrix-remodelling associated 8 [Source:MGI Symbol;Acc:MGI:1922011]	-0.711702	1.66762	-2.84581	0.00627964	0.997694	-2.38215
ENSMUSG00000038451	Spsb2	protein_coding	MGI Symbol	5	splA/ryanodine receptor domain and SOCS box containing 2 [Source:MGI Symbol;Acc:MGI:1315199]	-0.642227	1.70345	-2.84738	0.00625282	0.997694	-2.38667
ENSMUSG00000036863	Syde2	protein_coding	MGI Symbol	4	synapse defective 1, Rho GTPase, homolog 2 (C. elegans) [Source:MGI Symbol;Acc:MGI:3036264]	-0.779887	0.508245	-2.80234	0.00706359	0.997694	-2.40097
ENSMUSG00000034800	Zfp661	protein_coding	MGI Symbol	4	zinc finger protein 661 [Source:MGI Symbol;Acc:MGI:1919430]	0.429968	3.38056	2.92486	0.00505663	0.997694	-2.4024
ENSMUSG00000045193	Cirbp	protein_coding	MGI Symbol	7	cold inducible RNA binding protein [Source:MGI Symbol;Acc:MGI:893588]	-0.430215	7.90789	-3.07785	0.00329381	0.934287	-2.40392
ENSMUSG00000104114	Gm37297	TEC	MGI Symbol	1	predicted gene, 37297 [Source:MGI Symbol;Acc:MGI:5610525]	1.58915	-0.115364	2.81469	0.00683214	0.997694	-2.40558
ENSMUSG00000001604	Tcea3	protein_coding	MGI Symbol	3	transcription elongation factor A (SII), 3 [Source:MGI Symbol;Acc:MGI:1196908]	-2.1276	0.130981	-2.79455	0.00721326	0.997694	-2.42406
ENSMUSG00000014039	Prdm15	protein_coding	MGI Symbol	11	PR domain containing 15 [Source:MGI Symbol;Acc:MGI:1930121]	0.503644	3.25727	2.90656	0.0053183	0.997694	-2.43292
ENSMUSG00000028873	Cdca8	protein_coding	MGI Symbol	6	cell division cycle associated 8 [Source:MGI Symbol;Acc:MGI:1196274]	0.723055	1.63008	2.80259	0.00705884	0.997694	-2.44376
ENSMUSG00000021032	Ngb	protein_coding	MGI Symbol	3	neuroglobin [Source:MGI Symbol;Acc:MGI:2151886]	-1.04801	1.23333	-2.78816	0.00733827	0.997694	-2.44952
ENSMUSG00000022360	Atad2	protein_coding	MGI Symbol	8	ATPase family, AAA domain containing 2 [Source:MGI Symbol;Acc:MGI:1917722]	0.562182	2.47765	2.84979	0.00621197	0.997694	-2.46068
ENSMUSG00000035105	Egln3	protein_coding	MGI Symbol	1	egl-9 family hypoxia-inducible factor 3 [Source:MGI Symbol;Acc:MGI:1932288]	-0.789558	0.867453	-2.7799	0.0075028	0.997694	-2.46457
ENSMUSG00000102440	Pcdhga9	protein_coding	MGI Symbol	2	protocadherin gamma subfamily A, 9 [Source:MGI Symbol;Acc:MGI:1935226]	1.3782	-0.14026	2.77421	0.00761803	0.997694	-2.47988
ENSMUSG00000050714	Zbtb26	protein_coding	MGI Symbol	3	zinc finger and BTB domain containing 26 [Source:MGI Symbol;Acc:MGI:2444402]	0.524329	2.73257	2.84782	0.00624545	0.997694	-2.49096
ENSMUSG00000063632	Sox11	protein_coding	MGI Symbol	1	SRY (sex determining region Y)-box 11 [Source:MGI Symbol;Acc:MGI:98359]	0.457688	6.32706	3.01806	0.00390016	0.997694	-2.50828
ENSMUSG00000063838	Cdc42ep5	protein_coding	MGI Symbol	3	CDC42 effector protein (Rho GTPase binding) 5 [Source:MGI Symbol;Acc:MGI:1929745]	-0.903021	0.646902	-2.73647	0.00842505	0.997694	-2.55367
ENSMUSG00000040731	Eif4h	protein_coding	MGI Symbol	5	eukaryotic translation initiation factor 4H [Source:MGI Symbol;Acc:MGI:1341822]	-0.432982	8.62277	-3.02167	0.0038608	0.997694	-2.56214
ENSMUSG00000107023	Gm42715	protein_coding	MGI Symbol	2	predicted gene 42715 [Source:MGI Symbol;Acc:MGI:5662852]	0.596216	2.4861	2.80501	0.00701299	0.997694	-2.57742
ENSMUSG00000104100	Gm37880	TEC	MGI Symbol	1	predicted gene, 37880 [Source:MGI Symbol;Acc:MGI:5611108]	1.30623	-0.591336	2.71422	0.00893701	0.997694	-2.59689
ENSMUSG00000033458	Fan1	protein_coding	MGI Symbol	4	FANCD2/FANCI-associated nuclease 1 [Source:MGI Symbol;Acc:MGI:3045266]	1.04524	0.320108	2.70613	0.00913006	0.997694	-2.60052
ENSMUSG00000104696	Gm42946	TEC	MGI Symbol	1	predicted gene 42946 [Source:MGI Symbol;Acc:MGI:5663083]	1.62147	0.529395	2.70544	0.00914673	0.997694	-2.60184
ENSMUSG00000025602	Zfp202	protein_coding	MGI Symbol	3	zinc finger protein 202 [Source:MGI Symbol;Acc:MGI:1933401]	0.719191	1.24915	2.72825	0.00861103	0.997694	-2.60686
ENSMUSG00000045176	Borcs6	protein_coding	MGI Symbol	1	BLOC-1 related complex subunit 6 [Source:MGI Symbol;Acc:MGI:1919173]	-0.415789	3.73404	-2.87449	0.00580726	0.997694	-2.61697
ENSMUSG00000000794	Kcnn3	protein_coding	MGI Symbol	2	potassium intermediate/small conductance calcium-activated channel, subfamily N, member 3 [Source:MGI Symbol;Acc:MGI:2153183]	0.600744	1.74275	2.72929	0.00858731	0.997694	-2.65676
ENSMUSG00000019027	Dnah1	protein_coding	MGI Symbol	2	dynein, axonemal, heavy chain 1 [Source:MGI Symbol;Acc:MGI:107721]	0.516478	2.0336	2.74184	0.00830577	0.997694	-2.65797
ENSMUSG00000056268	Dennd1b	protein_coding	MGI Symbol	9	DENN/MADD domain containing 1B [Source:MGI Symbol;Acc:MGI:2447812]	0.454445	2.84872	2.79186	0.00726564	0.997694	-2.67171
ENSMUSG00000054737	Zfp182	protein_coding	MGI Symbol	5	zinc finger protein 182 [Source:MGI Symbol;Acc:MGI:2442220]	0.404279	2.80743	2.78421	0.00741655	0.997694	-2.67952
ENSMUSG00000033752	Mnd1	protein_coding	MGI Symbol	1	meiotic nuclear divisions 1 [Source:MGI Symbol;Acc:MGI:1924165]	0.723522	0.520892	2.66519	0.0101674	0.997694	-2.68654
ENSMUSG00000111151	Gm5120	processed_pseudogene	MGI Symbol	1	predicted gene 5120 [Source:MGI Symbol;Acc:MGI:3646745]	0.739218	-0.300452	2.66298	0.0102261	0.997694	-2.69319
ENSMUSG00000110924	Gm40518	lincRNA	MGI Symbol	2	predicted gene, 40518 [Source:MGI Symbol;Acc:MGI:5623403]	2.0507	-0.586005	2.69251	0.00946395	0.997694	-2.70025
ENSMUSG00000018372	Cep95	protein_coding	MGI Symbol	7	centrosomal protein 95 [Source:MGI Symbol;Acc:MGI:2443502]	0.438783	2.73319	2.7568	0.00798108	0.997694	-2.73005
ENSMUSG00000101599	Gm20342	lincRNA	MGI Symbol	1	predicted gene, 20342 [Source:MGI Symbol;Acc:MGI:5012527]	0.756474	1.91764	2.69771	0.00933518	0.997694	-2.75634
ENSMUSG00000078439	Smim24	protein_coding	MGI Symbol	3	small integral membrane protein 24 [Source:MGI Symbol;Acc:MGI:1919523]	1.14952	0.403076	2.622	0.0113775	0.997694	-2.77205
ENSMUSG00000020178	Adora2a	protein_coding	MGI Symbol	4	adenosine A2a receptor [Source:MGI Symbol;Acc:MGI:99402]	-0.940678	0.168207	-2.61168	0.0116857	0.997694	-2.79291
ENSMUSG00000020745	Pafah1b1	protein_coding	MGI Symbol	5	platelet-activating factor acetylhydrolase, isoform 1b, subunit 1 [Source:MGI Symbol;Acc:MGI:109520]	0.270862	7.76139	2.92421	0.00506568	0.997694	-2.7941
ENSMUSG00000106706	C530043K16Rik	TEC	MGI Symbol	1	RIKEN cDNA C530043K16 gene [Source:MGI Symbol;Acc:MGI:2444587]	1.20374	0.491925	2.61319	0.0116401	0.997694	-2.79823
ENSMUSG00000026432	Avpr1b	protein_coding	MGI Symbol	2	arginine vasopressin receptor 1B [Source:MGI Symbol;Acc:MGI:1347010]	1.8075	-0.428414	2.67921	0.00980042	0.997694	-2.80319
ENSMUSG00000048445	Ccdc57	protein_coding	MGI Symbol	3	coiled-coil domain containing 57 [Source:MGI Symbol;Acc:MGI:1918526]	0.510241	2.27043	2.69529	0.00939476	0.997694	-2.80979
ENSMUSG00000071568	Gm5874	processed_pseudogene	MGI Symbol	1	predicted gene 5874 [Source:MGI Symbol;Acc:MGI:3648027]	-0.798674	-0.0682863	-2.59725	0.0121289	0.997694	-2.8192
ENSMUSG00000056481	Cd248	protein_coding	MGI Symbol	1	CD248 antigen, endosialin [Source:MGI Symbol;Acc:MGI:1917695]	-1.08933	-0.373524	-2.59305	0.0122609	0.997694	-2.82737
ENSMUSG00000050335	Lgals3	protein_coding	MGI Symbol	6	lectin, galactose binding, soluble 3 [Source:MGI Symbol;Acc:MGI:96778]	-1.20657	0.848307	-2.59282	0.0122682	0.997694	-2.85087
ENSMUSG00000024120	Lrpprc	protein_coding	MGI Symbol	7	leucine-rich PPR-motif containing [Source:MGI Symbol;Acc:MGI:1919666]	0.259437	5.47618	2.85516	0.00612183	0.997694	-2.86415
ENSMUSG00000083539	Gm12466	processed_pseudogene	MGI Symbol	1	predicted gene 12466 [Source:MGI Symbol;Acc:MGI:3651763]	-0.727118	0.170109	-2.57585	0.0128148	0.997694	-2.86445
ENSMUSG00000078440	Dohh	protein_coding	MGI Symbol	5	deoxyhypusine hydroxylase/monooxygenase [Source:MGI Symbol;Acc:MGI:1915964]	-0.475642	4.88974	-2.82948	0.00656424	0.997694	-2.87914
ENSMUSG00000079608	Stard6	protein_coding	MGI Symbol	7	StAR-related lipid transfer (START) domain containing 6 [Source:MGI Symbol;Acc:MGI:2156774]	-0.723141	0.858842	-2.58599	0.0124856	0.997694	-2.88226
ENSMUSG00000038188	Scarf1	protein_coding	MGI Symbol	3	scavenger receptor class F, member 1 [Source:MGI Symbol;Acc:MGI:2449455]	-1.23691	0.18168	-2.56681	0.013115	0.997694	-2.88851
ENSMUSG00000062284	Gm6030	processed_pseudogene	MGI Symbol	1	predicted gene 6030 [Source:MGI Symbol;Acc:MGI:3645112]	0.801171	0.0733324	2.56186	0.0132822	0.997694	-2.88947
ENSMUSG00000049791	Fzd4	protein_coding	MGI Symbol	1	frizzled class receptor 4 [Source:MGI Symbol;Acc:MGI:108520]	-0.764308	1.81406	-2.62675	0.0112382	0.997694	-2.89751
ENSMUSG00000004865	Srpk1	protein_coding	MGI Symbol	13	serine/arginine-rich protein specific kinase 1 [Source:MGI Symbol;Acc:MGI:106908]	0.206743	7.10831	2.87578	0.00578687	0.997694	-2.90133
ENSMUSG00000097863	1010001B22Rik	lincRNA	MGI Symbol	1	RIKEN cDNA 1010001B22 gene [Source:MGI Symbol;Acc:MGI:1922653]	-0.783504	0.156825	-2.55256	0.0136012	0.997694	-2.9142
ENSMUSG00000034402	Kcnh5	protein_coding	MGI Symbol	1	potassium voltage-gated channel, subfamily H (eag-related), member 5 [Source:MGI Symbol;Acc:MGI:3584508]	-0.856475	0.669349	-2.57438	0.0128632	0.997694	-2.91895
ENSMUSG00000018427	Ypel2	protein_coding	MGI Symbol	2	yippee like 2 [Source:MGI Symbol;Acc:MGI:1925114]	0.305471	5.62796	2.82708	0.006607	0.997694	-2.93887
ENSMUSG00000023882	Zfp54	protein_coding	MGI Symbol	3	zinc finger protein 54 [Source:MGI Symbol;Acc:MGI:99201]	0.979215	0.230111	2.53378	0.014267	0.997694	-2.94227
ENSMUSG00000095115	Itpripl2	protein_coding	MGI Symbol	1	inositol 1,4,5-triphosphate receptor interacting protein-like 2 [Source:MGI Symbol;Acc:MGI:2442416]	-0.888421	0.876082	-2.54892	0.0137281	0.997694	-2.94557
ENSMUSG00000104951	Gm43413	TEC	MGI Symbol	1	predicted gene 43413 [Source:MGI Symbol;Acc:MGI:5663550]	1.24215	1.01466	2.5566	0.0134617	0.997694	-2.94584
ENSMUSG00000035152	Ap2b1	protein_coding	MGI Symbol	7	adaptor-related protein complex 2, beta 1 subunit [Source:MGI Symbol;Acc:MGI:1919020]	0.322897	7.48314	2.86031	0.00603648	0.997694	-2.9468
ENSMUSG00000015659	Serac1	protein_coding	MGI Symbol	5	serine active site containing 1 [Source:MGI Symbol;Acc:MGI:2447813]	0.640025	2.41359	2.62449	0.0113045	0.997694	-2.94975
ENSMUSG00000044595	Dnd1	protein_coding	MGI Symbol	3	DND microRNA-mediated repression inhibitor 1 [Source:MGI Symbol;Acc:MGI:2447763]	0.79944	0.782789	2.53983	0.0140495	0.997694	-2.95543
ENSMUSG00000001281	Itgb7	protein_coding	MGI Symbol	5	integrin beta 7 [Source:MGI Symbol;Acc:MGI:96616]	-1.26087	-0.482788	-2.52599	0.0145517	0.997694	-2.95945
ENSMUSG00000104017	Gm37363	TEC	MGI Symbol	1	predicted gene, 37363 [Source:MGI Symbol;Acc:MGI:5610591]	2.0954	-0.225893	2.54589	0.0138344	0.997694	-2.96061
ENSMUSG00000082494	Gm13687	processed_pseudogene	MGI Symbol	1	predicted gene 13687 [Source:MGI Symbol;Acc:MGI:3651822]	0.468016	2.85751	2.66066	0.0102884	0.997694	-2.96674
ENSMUSG00000035293	G2e3	protein_coding	MGI Symbol	5	G2/M-phase specific E3 ubiquitin ligase [Source:MGI Symbol;Acc:MGI:2444298]	0.386166	3.51755	2.69548	0.00939012	0.997694	-2.9767
ENSMUSG00000024960	Plcb3	protein_coding	MGI Symbol	10	phospholipase C, beta 3 [Source:MGI Symbol;Acc:MGI:104778]	-0.540781	1.88652	-2.5984	0.012093	0.997694	-2.9936
ENSMUSG00000040511	Pvr	protein_coding	MGI Symbol	5	poliovirus receptor [Source:MGI Symbol;Acc:MGI:107741]	0.570789	2.42655	2.62559	0.0112722	0.997694	-3.00476
ENSMUSG00000096929	A330023F24Rik	processed_transcript	MGI Symbol	4	RIKEN cDNA A330023F24 gene [Source:MGI Symbol;Acc:MGI:2443958]	0.908082	2.57111	2.61859	0.0114785	0.997694	-3.01319
ENSMUSG00000097504	4930516B21Rik	lincRNA	MGI Symbol	1	RIKEN cDNA 4930516B21 gene [Source:MGI Symbol;Acc:MGI:1922364]	0.719104	0.350441	2.50698	0.0152684	0.997694	-3.01594
ENSMUSG00000070003	Ssbp4	protein_coding	MGI Symbol	15	single stranded DNA binding protein 4 [Source:MGI Symbol;Acc:MGI:1924150]	-0.718787	3.89114	-2.72394	0.00870984	0.997694	-3.01854
ENSMUSG00000022704	Qtrt2	protein_coding	MGI Symbol	10	queuine tRNA-ribosyltransferase accessory subunit 2 [Source:MGI Symbol;Acc:MGI:1922194]	0.382448	4.10552	2.72308	0.00872976	0.997694	-3.02125
ENSMUSG00000106579	Gm42771	TEC	MGI Symbol	1	predicted gene 42771 [Source:MGI Symbol;Acc:MGI:5662908]	1.35592	-0.285869	2.49133	0.0158823	0.997694	-3.02269
ENSMUSG00000043602	Zfp3	protein_coding	MGI Symbol	1	zinc finger protein 3 [Source:MGI Symbol;Acc:MGI:99177]	-0.451556	3.76042	-2.70069	0.00926205	0.997694	-3.03741
ENSMUSG00000033054	Npat	protein_coding	MGI Symbol	2	nuclear protein in the AT region [Source:MGI Symbol;Acc:MGI:107605]	0.26188	4.5264	2.73623	0.00843039	0.997694	-3.03758
ENSMUSG00000107756	Gm44164	TEC	MGI Symbol	1	predicted gene, 44164 [Source:MGI Symbol;Acc:MGI:5690556]	1.35122	-0.0643663	2.48365	0.0161913	0.997694	-3.04678
ENSMUSG00000040652	Oaz2	protein_coding	MGI Symbol	7	ornithine decarboxylase antizyme 2 [Source:MGI Symbol;Acc:MGI:109492]	-0.260186	7.41891	-2.8199	0.00673665	0.997694	-3.04851
ENSMUSG00000024583	Txnl1	protein_coding	MGI Symbol	8	thioredoxin-like 1 [Source:MGI Symbol;Acc:MGI:1860078]	-0.323233	7.28915	-2.81782	0.00677466	0.997694	-3.04989
ENSMUSG00000020473	Aebp1	protein_coding	MGI Symbol	3	AE binding protein 1 [Source:MGI Symbol;Acc:MGI:1197012]	-0.980088	1.75475	-2.55776	0.0134219	0.997694	-3.0519
ENSMUSG00000027520	Zdbf2	protein_coding	MGI Symbol	4	zinc finger, DBF-type containing 2 [Source:MGI Symbol;Acc:MGI:1921134]	0.440377	3.11639	2.63163	0.0110967	0.997694	-3.05648
ENSMUSG00000110631	Gm42047	lincRNA	MGI Symbol	2	predicted gene, 42047 [Source:MGI Symbol;Acc:MGI:5624932]	-1.16057	-0.426312	-2.47083	0.0167197	0.997694	-3.06079
ENSMUSG00000105983	Gm42770	TEC	MGI Symbol	1	predicted gene 42770 [Source:MGI Symbol;Acc:MGI:5662907]	0.877451	0.527923	2.47823	0.016413	0.997694	-3.07261
ENSMUSG00000087184	Gm11650	processed_transcript	MGI Symbol	1	predicted gene 11650 [Source:MGI Symbol;Acc:MGI:3650132]	-1.15232	-0.63747	-2.45947	0.0172008	0.997694	-3.08163
ENSMUSG00000059743	Fdps	protein_coding	MGI Symbol	7	farnesyl diphosphate synthetase [Source:MGI Symbol;Acc:MGI:104888]	0.666533	0.864736	2.47933	0.0163679	0.997694	-3.08356
ENSMUSG00000057722	Lepr	protein_coding	MGI Symbol	7	leptin receptor [Source:MGI Symbol;Acc:MGI:104993]	-1.53698	-0.792097	-2.46024	0.0171681	0.997694	-3.08502
ENSMUSG00000001576	Ergic1	protein_coding	MGI Symbol	14	endoplasmic reticulum-golgi intermediate compartment (ERGIC) 1 [Source:MGI Symbol;Acc:MGI:1914708]	0.412588	5.82523	2.77179	0.0076676	0.997694	-3.09589
ENSMUSG00000097251	5033417F24Rik	antisense	MGI Symbol	1	RIKEN cDNA 5033417F24 gene [Source:MGI Symbol;Acc:MGI:1923245]	0.83135	-0.438319	2.45075	0.017579	0.997694	-3.09833
ENSMUSG00000002233	Rhoc	protein_coding	MGI Symbol	6	ras homolog family member C [Source:MGI Symbol;Acc:MGI:106028]	-0.442591	3.60706	-2.64574	0.010697	0.997694	-3.10131
ENSMUSG00000045337	Defb11	protein_coding	MGI Symbol	1	defensin beta 11 [Source:MGI Symbol;Acc:MGI:2179197]	-3.94066	-3.29224	-2.58183	0.0126198	0.997694	-3.10188
ENSMUSG00000082768	Gm12727	processed_pseudogene	MGI Symbol	1	predicted gene 12727 [Source:MGI Symbol;Acc:MGI:3649747]	-0.616175	0.15244	-2.45324	0.01747	0.997694	-3.10801
ENSMUSG00000032204	Aqp9	protein_coding	MGI Symbol	10	aquaporin 9 [Source:MGI Symbol;Acc:MGI:1891066]	-1.03893	-0.528454	-2.44369	0.0178901	0.997694	-3.11164
ENSMUSG00000024818	Slc25a45	protein_coding	MGI Symbol	7	solute carrier family 25, member 45 [Source:MGI Symbol;Acc:MGI:2147731]	0.676441	1.81231	2.50874	0.0152007	0.997694	-3.12076
ENSMUSG00000037370	Enpp1	protein_coding	MGI Symbol	5	ectonucleotide pyrophosphatase/phosphodiesterase 1 [Source:MGI Symbol;Acc:MGI:97370]	-0.99316	0.600015	-2.45267	0.0174949	0.997694	-3.12221
ENSMUSG00000110159	Gm45501	TEC	MGI Symbol	1	predicted gene 45501 [Source:MGI Symbol;Acc:MGI:5791337]	1.03051	0.292243	2.44821	0.0176901	0.997694	-3.134
ENSMUSG00000032113	Chek1	protein_coding	MGI Symbol	8	checkpoint kinase 1 [Source:MGI Symbol;Acc:MGI:1202065]	0.716237	0.603598	2.4429	0.0179251	0.997694	-3.13758
ENSMUSG00000021572	Cep72	protein_coding	MGI Symbol	7	centrosomal protein 72 [Source:MGI Symbol;Acc:MGI:1921720]	0.629233	1.16847	2.46883	0.0168035	0.997694	-3.13947
ENSMUSG00000033088	Triobp	protein_coding	MGI Symbol	12	TRIO and F-actin binding protein [Source:MGI Symbol;Acc:MGI:1349410]	-0.619417	1.82397	-2.52369	0.0146368	0.997694	-3.14157
ENSMUSG00000028587	Orc1	protein_coding	MGI Symbol	5	origin recognition complex, subunit 1 [Source:MGI Symbol;Acc:MGI:1328337]	0.769196	-0.25579	2.41305	0.0192997	0.997694	-3.16602
ENSMUSG00000021798	Ldb3	protein_coding	MGI Symbol	8	LIM domain binding 3 [Source:MGI Symbol;Acc:MGI:1344412]	0.338362	3.58815	2.61157	0.011689	0.997694	-3.16749
ENSMUSG00000021758	Ddx4	protein_coding	MGI Symbol	2	DEAD (Asp-Glu-Ala-Asp) box polypeptide 4 [Source:MGI Symbol;Acc:MGI:102670]	-1.10832	0.519996	-2.43598	0.0182359	0.997694	-3.16904
ENSMUSG00000055653	Gpc3	protein_coding	MGI Symbol	2	glypican 3 [Source:MGI Symbol;Acc:MGI:104903]	-0.755808	1.1313	-2.46452	0.0169855	0.997694	-3.17986
ENSMUSG00000112381	Gm8170	processed_pseudogene	MGI Symbol	1	predicted gene 8170 [Source:MGI Symbol;Acc:MGI:3644928]	1.07992	-0.532329	2.40424	0.0197228	0.997694	-3.18183
ENSMUSG00000005973	Rcn1	protein_coding	MGI Symbol	2	reticulocalbin 1 [Source:MGI Symbol;Acc:MGI:104559]	-0.601167	1.78535	-2.49414	0.0157704	0.997694	-3.18309
ENSMUSG00000084946	Dlx1as	antisense	MGI Symbol	4	distal-less homeobox 1, antisense [Source:MGI Symbol;Acc:MGI:1195983]	0.525094	1.52162	2.4707	0.0167253	0.997694	-3.18325
ENSMUSG00000048503	Tlcd5	protein_coding	MGI Symbol	4	TLC domain containing 5 [Source:MGI Symbol;Acc:MGI:2685030]	0.36978	4.14006	2.65293	0.0104984	0.997694	-3.18583
ENSMUSG00000113450	Gm49359	protein_coding	MGI Symbol	3	predicted gene, 49359 [Source:MGI Symbol;Acc:MGI:6121568]	0.497616	1.89284	2.4911	0.0158915	0.997694	-3.188
ENSMUSG00000046318	Ccbe1	protein_coding	MGI Symbol	7	collagen and calcium binding EGF domains 1 [Source:MGI Symbol;Acc:MGI:2445053]	-0.381068	3.45311	-2.60951	0.0117513	0.997694	-3.18876
ENSMUSG00000049488	Tmem67	protein_coding	MGI Symbol	6	transmembrane protein 67 [Source:MGI Symbol;Acc:MGI:1923928]	0.570209	1.73264	2.4932	0.0158078	0.997694	-3.1936
ENSMUSG00000063383	Zfp947	protein_coding	MGI Symbol	1	zinc finger protein 947 [Source:MGI Symbol;Acc:MGI:3646759]	-0.699506	0.73309	-2.42839	0.0185822	0.997694	-3.19645
ENSMUSG00000074361	C5ar2	protein_coding	MGI Symbol	4	complement component 5a receptor 2 [Source:MGI Symbol;Acc:MGI:2442013]	0.860417	-0.289779	2.39948	0.0199551	0.997694	-3.19699
ENSMUSG00000036928	Stag3	protein_coding	MGI Symbol	9	stromal antigen 3 [Source:MGI Symbol;Acc:MGI:1355311]	-0.765775	-0.310442	-2.39999	0.0199302	0.997694	-3.19905
ENSMUSG00000093682	Gm20681	lincRNA	MGI Symbol	1	predicted gene 20681 [Source:MGI Symbol;Acc:MGI:5313128]	0.923468	-0.0272573	2.39765	0.020045	0.997694	-3.20017
ENSMUSG00000085218	BB218582	processed_transcript	MGI Symbol	3	expressed sequence BB218582 [Source:MGI Symbol;Acc:MGI:2139448]	-0.592416	1.85604	-2.4866	0.016072	0.997694	-3.20209
ENSMUSG00000026516	Nvl	protein_coding	MGI Symbol	5	nuclear VCP-like [Source:MGI Symbol;Acc:MGI:1914709]	0.358651	5.75189	2.72237	0.00874638	0.997694	-3.21473
ENSMUSG00000064202	4430402I18Rik	protein_coding	MGI Symbol	8	RIKEN cDNA 4430402I18 gene [Source:MGI Symbol;Acc:MGI:1918036]	-0.365838	2.61614	-2.53605	0.0141851	0.997694	-3.21647
ENSMUSG00000053740	Gm6457	processed_pseudogene	MGI Symbol	1	predicted pseudogene 6457 [Source:MGI Symbol;Acc:MGI:3648519]	0.585485	1.01475	2.42148	0.0189021	0.997694	-3.21873
ENSMUSG00000106391	Gm42690	TEC	MGI Symbol	1	predicted gene 42690 [Source:MGI Symbol;Acc:MGI:5662827]	-0.772651	0.424723	-2.40144	0.0198593	0.997694	-3.21902
ENSMUSG00000023495	Pcbp4	protein_coding	MGI Symbol	23	poly(rC) binding protein 4 [Source:MGI Symbol;Acc:MGI:1890471]	-0.620117	5.94398	-2.7281	0.00861437	0.997694	-3.21971
ENSMUSG00000105922	Gm42769	TEC	MGI Symbol	1	predicted gene 42769 [Source:MGI Symbol;Acc:MGI:5662906]	1.1189	1.29933	2.43339	0.0183534	0.997694	-3.22097
ENSMUSG00000020475	Pgam2	protein_coding	MGI Symbol	1	phosphoglycerate mutase 2 [Source:MGI Symbol;Acc:MGI:1933118]	0.500042	4.2948	2.63527	0.0109923	0.997694	-3.22598
ENSMUSG00000027573	Gid8	protein_coding	MGI Symbol	3	GID complex subunit 8 [Source:MGI Symbol;Acc:MGI:1923675]	-0.224844	4.97577	-2.68267	0.00971181	0.997694	-3.23251
ENSMUSG00000023918	Adgrf4	protein_coding	MGI Symbol	4	adhesion G protein-coupled receptor F4 [Source:MGI Symbol;Acc:MGI:1925499]	1.20562	-0.115763	2.37433	0.0212234	0.997694	-3.23621
ENSMUSG00000063849	Ppcdc	protein_coding	MGI Symbol	14	phosphopantothenoylcysteine decarboxylase [Source:MGI Symbol;Acc:MGI:1914062]	0.297264	4.3161	2.62695	0.0112324	0.997694	-3.25298
ENSMUSG00000108520	Gm44684	processed_transcript	MGI Symbol	1	predicted gene 44684 [Source:MGI Symbol;Acc:MGI:5753260]	0.884682	0.494922	2.38242	0.0208079	0.997694	-3.25492
ENSMUSG00000044937	Ttc41	protein_coding	MGI Symbol	6	tetratricopeptide repeat domain 41 [Source:MGI Symbol;Acc:MGI:2387653]	0.799284	0.275527	2.37471	0.0212038	0.997694	-3.26088
ENSMUSG00000041623	D11Wsu47e	protein_coding	MGI Symbol	4	DNA segment, Chr 11, Wayne State University 47, expressed [Source:MGI Symbol;Acc:MGI:106356]	-0.419484	3.11472	-2.5441	0.0138976	0.997694	-3.26213
ENSMUSG00000048489	Depp1	protein_coding	MGI Symbol	3	DEPP1 autophagy regulator [Source:MGI Symbol;Acc:MGI:1918730]	1.90544	0.121625	2.36273	0.0218321	0.997694	-3.26826
ENSMUSG00000027381	Bcl2l11	protein_coding	MGI Symbol	8	BCL2-like 11 (apoptosis facilitator) [Source:MGI Symbol;Acc:MGI:1197519]	0.471887	2.05772	2.46851	0.0168171	0.997694	-3.27272
ENSMUSG00000026765	Lypd6b	protein_coding	MGI Symbol	3	LY6/PLAUR domain containing 6B [Source:MGI Symbol;Acc:MGI:1919147]	-0.417296	2.18675	-2.49315	0.0158097	0.997694	-3.2803
ENSMUSG00000019433	Gipc1	protein_coding	MGI Symbol	3	GIPC PDZ domain containing family, member 1 [Source:MGI Symbol;Acc:MGI:1926252]	-0.375052	5.93211	-2.69862	0.00931266	0.997694	-3.28243
ENSMUSG00000028125	Abca4	protein_coding	MGI Symbol	10	ATP-binding cassette, sub-family A (ABC1), member 4 [Source:MGI Symbol;Acc:MGI:109424]	-1.60514	-0.247464	-2.34635	0.0227183	0.997694	-3.28877
ENSMUSG00000004562	Arhgef40	protein_coding	MGI Symbol	26	Rho guanine nucleotide exchange factor (GEF) 40 [Source:MGI Symbol;Acc:MGI:2685515]	-0.366837	3.21281	-2.55554	0.0134981	0.997694	-3.28928
ENSMUSG00000025150	Cbr2	protein_coding	MGI Symbol	4	carbonyl reductase 2 [Source:MGI Symbol;Acc:MGI:107200]	-1.03953	-0.433133	-2.34757	0.0226514	0.997694	-3.28949
ENSMUSG00000042345	Ubash3a	protein_coding	MGI Symbol	9	ubiquitin associated and SH3 domain containing, A [Source:MGI Symbol;Acc:MGI:1926074]	0.771351	0.786406	2.38035	0.0209133	0.997694	-3.29009
ENSMUSG00000061517	Sox21	protein_coding	MGI Symbol	1	SRY (sex determining region Y)-box 21 [Source:MGI Symbol;Acc:MGI:2654070]	0.545804	1.60799	2.44366	0.0178916	0.997694	-3.29274
ENSMUSG00000023328	Ache	protein_coding	MGI Symbol	9	acetylcholinesterase [Source:MGI Symbol;Acc:MGI:87876]	-0.467637	4.3888	-2.62241	0.0113654	0.997694	-3.29791
ENSMUSG00000017723	Wfdc2	protein_coding	MGI Symbol	5	WAP four-disulfide core domain 2 [Source:MGI Symbol;Acc:MGI:1914951]	-3.35352	-1.55082	-2.36693	0.0216099	0.997694	-3.30087
ENSMUSG00000028270	Gbp2	protein_coding	MGI Symbol	2	guanylate binding protein 2 [Source:MGI Symbol;Acc:MGI:102772]	-1.00572	0.287745	-2.34903	0.022571	0.997694	-3.30247
ENSMUSG00000006342	Susd2	protein_coding	MGI Symbol	4	sushi domain containing 2 [Source:MGI Symbol;Acc:MGI:1918983]	-0.847791	0.135983	-2.35617	0.0221832	0.997694	-3.30459
ENSMUSG00000054556	Gm4876	antisense	MGI Symbol	6	predicted gene 4876 [Source:MGI Symbol;Acc:MGI:3647654]	-0.594089	0.848224	-2.37949	0.0209572	0.997694	-3.30724
ENSMUSG00000097430	Gm10544	processed_transcript	MGI Symbol	3	predicted gene 10544 [Source:MGI Symbol;Acc:MGI:3642892]	0.798459	-0.355237	2.33247	0.0234942	0.997694	-3.31308
ENSMUSG00000037822	Smim14	protein_coding	MGI Symbol	9	small integral membrane protein 14 [Source:MGI Symbol;Acc:MGI:1915802]	-0.190858	7.6699	-2.71261	0.00897505	0.997694	-3.31395
ENSMUSG00000085251	Gm12326	lincRNA	MGI Symbol	2	predicted gene 12326 [Source:MGI Symbol;Acc:MGI:3651350]	0.903559	-0.0919392	2.33105	0.0235753	0.997694	-3.31554
ENSMUSG00000032014	Oaf	protein_coding	MGI Symbol	3	out at first homolog [Source:MGI Symbol;Acc:MGI:94852]	-0.538433	2.04325	-2.45507	0.0173905	0.997694	-3.32116
ENSMUSG00000026831	1700007K13Rik	protein_coding	MGI Symbol	3	RIKEN cDNA 1700007K13 gene [Source:MGI Symbol;Acc:MGI:1916577]	-0.996093	-0.206767	-2.3275	0.023778	0.997694	-3.32199
ENSMUSG00000029344	Tpst2	protein_coding	MGI Symbol	8	protein-tyrosine sulfotransferase 2 [Source:MGI Symbol;Acc:MGI:1309516]	-0.393907	5.23515	-2.6591	0.0103306	0.997694	-3.3255
ENSMUSG00000036814	Slc6a20a	protein_coding	MGI Symbol	3	solute carrier family 6 (neurotransmitter transporter), member 20A [Source:MGI Symbol;Acc:MGI:2143217]	-0.957209	1.68701	-2.4137	0.0192686	0.997694	-3.32893
ENSMUSG00000050854	Tmem125	protein_coding	MGI Symbol	5	transmembrane protein 125 [Source:MGI Symbol;Acc:MGI:1923409]	-0.470963	3.41524	-2.55236	0.0136082	0.997694	-3.32901
ENSMUSG00000076928	Trac	TR_C_gene	MGI Symbol	2	T cell receptor alpha constant [Source:MGI Symbol;Acc:MGI:4439838]	0.694405	0.661099	2.34361	0.0228699	0.997694	-3.33968
ENSMUSG00000056155	Nanos3	protein_coding	MGI Symbol	3	nanos C2HC-type zinc finger 3 [Source:MGI Symbol;Acc:MGI:2675387]	-0.929949	-0.472135	-2.31372	0.0245801	0.997694	-3.34384
ENSMUSG00000025817	Nudt5	protein_coding	MGI Symbol	6	nudix (nucleoside diphosphate linked moiety X)-type motif 5 [Source:MGI Symbol;Acc:MGI:1858232]	0.217754	5.18166	2.63954	0.0108709	0.997694	-3.34531
ENSMUSG00000117743	Gm50232	antisense	MGI Symbol	1	predicted gene, 50232 [Source:MGI Symbol;Acc:MGI:6303036]	1.16697	-0.560568	2.31227	0.0246662	0.997694	-3.34606
ENSMUSG00000107815	Gm44257	lincRNA	MGI Symbol	1	predicted gene, 44257 [Source:MGI Symbol;Acc:MGI:5690649]	0.495229	1.95136	2.4252	0.0187294	0.997694	-3.35217
ENSMUSG00000072473	1700024G13Rik	protein_coding	MGI Symbol	1	RIKEN cDNA 1700024G13 gene [Source:MGI Symbol;Acc:MGI:1914335]	-1.36624	-0.752871	-2.30642	0.0250149	0.997694	-3.35285
ENSMUSG00000036499	Eea1	protein_coding	MGI Symbol	5	early endosome antigen 1 [Source:MGI Symbol;Acc:MGI:2442192]	0.221747	5.51065	2.64315	0.0107694	0.997694	-3.37448
ENSMUSG00000029718	Pcolce	protein_coding	MGI Symbol	12	procollagen C-endopeptidase enhancer protein [Source:MGI Symbol;Acc:MGI:105099]	-1.44957	1.78119	-2.38292	0.0207824	0.997694	-3.37792
ENSMUSG00000072915	Gm12258	protein_coding	MGI Symbol	3	predicted gene 12258 [Source:MGI Symbol;Acc:MGI:3651534]	0.354187	3.72534	2.5306	0.0143828	0.997694	-3.38095
ENSMUSG00000064264	Zfp428	protein_coding	MGI Symbol	4	zinc finger protein 428 [Source:MGI Symbol;Acc:MGI:1916463]	-0.589029	3.74635	-2.54362	0.0139144	0.997694	-3.39032
ENSMUSG00000051606	2010001K21Rik	processed_transcript	MGI Symbol	4	RIKEN cDNA 2010001K21 gene [Source:MGI Symbol;Acc:MGI:1917079]	-1.01778	-0.181377	-2.28724	0.0261897	0.997694	-3.394
ENSMUSG00000041801	Phlda3	protein_coding	MGI Symbol	2	pleckstrin homology like domain, family A, member 3 [Source:MGI Symbol;Acc:MGI:1351485]	-0.641752	3.1876	-2.5108	0.0151219	0.997694	-3.39433
ENSMUSG00000031821	Gins2	protein_coding	MGI Symbol	4	GINS complex subunit 2 (Psf2 homolog) [Source:MGI Symbol;Acc:MGI:1921019]	-0.467962	2.14255	-2.41333	0.0192863	0.997694	-3.39456
ENSMUSG00000032667	Pon2	protein_coding	MGI Symbol	4	paraoxonase 2 [Source:MGI Symbol;Acc:MGI:106687]	-0.339481	4.83236	-2.59876	0.0120818	0.997694	-3.40111
ENSMUSG00000020275	Rel	protein_coding	MGI Symbol	1	reticuloendotheliosis oncogene [Source:MGI Symbol;Acc:MGI:97897]	0.485647	2.2715	2.41878	0.0190288	0.997694	-3.40534
ENSMUSG00000032492	Pth1r	protein_coding	MGI Symbol	6	parathyroid hormone 1 receptor [Source:MGI Symbol;Acc:MGI:97801]	-0.624456	1.1212	-2.33177	0.023534	0.997694	-3.40582
ENSMUSG00000002409	Dyrk1b	protein_coding	MGI Symbol	3	dual-specificity tyrosine-(Y)-phosphorylation regulated kinase 1b [Source:MGI Symbol;Acc:MGI:1330302]	-0.691391	2.70727	-2.46938	0.0167805	0.997694	-3.40949
ENSMUSG00000010307	Tmem86a	protein_coding	MGI Symbol	2	transmembrane protein 86A [Source:MGI Symbol;Acc:MGI:1915143]	-0.431977	3.9399	-2.54184	0.0139776	0.997694	-3.40958
ENSMUSG00000058586	Serhl	protein_coding	MGI Symbol	18	serine hydrolase-like [Source:MGI Symbol;Acc:MGI:1890404]	-0.589306	0.711387	-2.30871	0.0248778	0.997694	-3.40963
ENSMUSG00000025404	R3hdm2	protein_coding	MGI Symbol	21	R3H domain containing 2 [Source:MGI Symbol;Acc:MGI:1919000]	-0.315912	6.07882	-2.64872	0.0106141	0.997694	-3.41085
ENSMUSG00000082396	Zfp389	transcribed_processed_pseudogene	MGI Symbol	2	zinc finger protein 389 [Source:MGI Symbol;Acc:MGI:3641940]	0.959853	-0.391094	2.27177	0.0271733	0.997694	-3.41132
ENSMUSG00000027737	Slc7a11	protein_coding	MGI Symbol	5	solute carrier family 7 (cationic amino acid transporter, y+ system), member 11 [Source:MGI Symbol;Acc:MGI:1347355]	-0.623176	3.47027	-2.49923	0.0155697	0.997694	-3.42972
ENSMUSG00000009075	Cabp7	protein_coding	MGI Symbol	1	calcium binding protein 7 [Source:MGI Symbol;Acc:MGI:2183437]	-0.395852	6.23302	-2.64381	0.0107508	0.997694	-3.43021
ENSMUSG00000000339	Rtca	protein_coding	MGI Symbol	5	RNA 3prime-terminal phosphate cyclase [Source:MGI Symbol;Acc:MGI:1913618]	-0.256482	6.35218	-2.6477	0.0106424	0.997694	-3.43032
ENSMUSG00000081185	Gm4852	processed_pseudogene	MGI Symbol	1	predicted pseudogene 4852 [Source:MGI Symbol;Acc:MGI:3643039]	-0.642426	-0.051113	-2.27685	0.0268465	0.997694	-3.43361
ENSMUSG00000002980	Bcam	protein_coding	MGI Symbol	5	basal cell adhesion molecule [Source:MGI Symbol;Acc:MGI:1929940]	-0.910935	0.439072	-2.28832	0.0261222	0.997694	-3.4402
ENSMUSG00000118506	1700094D03Rik	protein_coding	MGI Symbol	2	RIKEN cDNA 1700094D03 gene [Source:MGI Symbol;Acc:MGI:1920795]	0.762069	0.569504	2.28695	0.0262083	0.997694	-3.44039
ENSMUSG00000036555	Iqce	protein_coding	MGI Symbol	12	IQ motif containing E [Source:MGI Symbol;Acc:MGI:1921489]	0.312062	3.67331	2.50702	0.0152669	0.997694	-3.44114
ENSMUSG00000037405	Icam1	protein_coding	MGI Symbol	2	intercellular adhesion molecule 1 [Source:MGI Symbol;Acc:MGI:96392]	-1.12482	-0.369438	-2.25884	0.0280198	0.997694	-3.44415
ENSMUSG00000060843	Ctnna3	protein_coding	MGI Symbol	5	catenin (cadherin associated protein), alpha 3 [Source:MGI Symbol;Acc:MGI:2661445]	1.09481	-0.460139	2.24923	0.0286645	0.997694	-3.44938
ENSMUSG00000040564	Apoc1	protein_coding	MGI Symbol	4	apolipoprotein C-I [Source:MGI Symbol;Acc:MGI:88053]	-1.13481	-0.0485702	-2.25867	0.0280311	0.997694	-3.45007
ENSMUSG00000037321	Tap1	protein_coding	MGI Symbol	7	transporter 1, ATP-binding cassette, sub-family B (MDR/TAP) [Source:MGI Symbol;Acc:MGI:98483]	-0.712952	0.617106	-2.28309	0.0264502	0.997694	-3.45128
[truncated: 15,916 more rows]

## Sheet: 2c-WT Diest vs WT Male
ensembl_gene_id	external_gene_name	gene_biotype	external_gene_source	transcript_count	description	logFC	AveExpr	t	P.Value	adj.P.Val	B
[truncated: 16,168 more rows]

[truncated: 8 more sheets: 2d-WT Pro vs WT Male, 2e-WT Est vs WT Male, 2f-WT Met vs WT Diest, 2g-WT Met vs WT Pro, 2h-WT Met vs WT Est, 2i-WT Diest vs WT Est, 2j-WT Diest vs WT Pro, 2k-WT Pro vs WT Est]
