# Supplementary material for: Cnih3 Deletion Dysregulates Dorsal Hippocampal Transcription across the Estrous Cycle
Source: eNeuro. 2023 Mar 13;10(3):ENEURO.0153-22.2023. doi: 10.1523/ENEURO.0153-22.2023 (PMC10027183; doi:10.1523/ENEURO.0153-22.2023)
Supplement: Extended Data Table 6-1 — Patterns of altered sex-differential expression between WT and Cnih3 KOs for diestrus and estrus. A, Number of genes significantly (FDR < 0.05) DE in both genotypes for male versus stage, stage versus stage, and male versus all female comparisons. B, Cluster assignment of KO male versus KO diestrus DEGs for expression patterns across WT male, KO male, WT diestrus, and KO diestrus. Two such patterns are shown in Figure 6D. C, Cluster assignment of KO male versus KO estrus DEGs for expression patterns across WT male, KO male, WT diestrus, and KO diestrus. Two such patterns are shown in Figure 6D. D, Combined Enrichr annotations for diestrus-male KO DEGs with KO/WT sex DE patterns 1 or 3 as listed in sheet 6A and for estrus-male KO DEGs with KO/WT sex DE patterns 1 or 3 as listed in sheet 6B. Also listed are enrichments found for the union of DEG sets from a male-diestrus and a male-estrus comparison where the genotypes’ DE pattern was similar for the two stages (labels reading “Union of…”). Highlighted rows met our described criteria for enrichment in this particular analysis (≥8 DEGs overlapping with Enrichr term, Enrichr OR ≥ 2, nominal p-value < 0.05). E, Listing of each term enriched in at least one of the six cross-genotype estrous stage-versus-male DEG pattern sets above, listing which pattern(s) were enriched for a given term. Download Table 6-1, XLS file. [file enu-eN-NWR-0153-22-s18.xls]

## Sheet: Table Key
Sheet A: Number of genes significantly (FDR<0.05) DE in both genotypes for male vs. stage, stage vs. stage, and male vs. all female comparisons
Sheet B: Genes and pattern assignments from clustering analysis of within-genotype (WT or KO) male vs. diestrus DEGs. Clusters 1 and 3 ("DiestVMaleAccent1" and "DiestVMaleAccent3") are reflected in table 6C; both clusters are reported on in 6D.
Sheet C: Genes and pattern assignments from clustering analysis of within-genotype (WT or KO) male vs. estrus DEGs. Clusters ("EstVMaleAccent1" and"EstVMaleAccent3") are reoported on further in sheets C+D .
Sheet D: Enrichr analysis of DEG Sets with Accentuated Male-Estrus and Male-Diestrus Differences in KOs relative to WTs
Columns are as follows: Term: Gene set name in Enrichr (can be cell types, ontology terms, transcription factors, or any other term in an Enrichr-indexed database) db: database from which the Term comes (Estrous-Stage vs Male) KO vs WT DE Pattern Set: the corresponding gene pattern cluster (EstVMaleAccent1, EstVMaleAccent3, DiestVMaleAccent1, DiestVMaleAccent6 that contained the genes tested for …
Sheet E: Tabulation of # of KO-WT Stage vs Male Pattern Clustsers Enriched for Enrichr Gene Sets
Columns are as follows: Term: Gene set name in Enrichr (can be cell types, ontology terms, transcription factors, or any other term in an Enrichr-indexed database) N_enriched_sexDE_patterns: number of pattern sets w different KO pattern expression in male vs. diestrus or proestrus (6 max; each of the four individual clusters and the combined "cluster 1" pattern from each stage, and the combined c…

## Sheet: 6a-Fx Match in Sig DEGs x-geno
Contrast Pair	KO Effect Direction Opposite of WT	KO and WT Effect Direction Match
Male vs. Metestrus	0	5
Male vs. Diestrus	0	61
Male vs. Estrus	0	8
Male vs. Proestrus	0	5
Male vs. All Females	0	6
Metestrus vs. Proestrus	0	9
Metestrus vs. Diestrus	0	663
Metestrus vs. Estrus	0	0
Diestrus vs. Proestrus	1	1150
Diestrus vs. Estrus	0	2782
Proestrus vs. Estrus	0	19
Total DE events	1	4708

## Sheet: 6b-KO Di-Male DEGs-WT,KO clust
genes	cluster
Cav2	1
Ngfr	2
Fer	1
Tfe3	3
Gna12	2
Gpr107	3
Nalcn	2
Dgke	3
Arvcf	2
Comt	2
Dbt	1
Cttnbp2	3
Raf1	2
Septin1	2
Acvr1b	2
Clcn4	3
Sema4f	2
Sez6	3
Chmp1a	1
Ddx3x	1
Hip1r	2
Gm38393	5
Mmp14	2
Mapk7	2
Mfsd10	2
Poldip2	2
Sebox	1
Araf	1
Cfp	3
Cnnm3	2
Lman2l	2
Sema6b	2
Gramd1a	2
Rarg	2
Rrp15	2
Srr	1
Itga3	2
Tulp3	2
Nom1	2
Ifrd1	2
Naglu	2
Tspan33	2
Rin2	1
Chordc1	1
Lrp3	2
Zdhhc4	2
Aif1l	2
Gria3	3
Bcap31	2
Tmem25	3
Spag5	1
Rab34	2
Ccne1	2
Bbc3	2
Acp2	3
Slc39a13	2
Ddb2	2
Smg9	2
Lmf1	2
Tm9sf1	2
Tmem161a	2
Dyrk1b	2
Tchp	2
Akap8l	2
Cse1l	1
Kdelr1	2
Epdr1	2
Atg4d	2
Adprh	2
Tpra1	3
Med25	2
Clptm1	2
Relb	2
Tomm40	2
Fam32a	1
Stard3nl	2
Efna2	2
Dgcr2	3
Yju2	2
Car11	2
Plag1	2
Glg1	3
Pld3	3
Rabac1	2
Prkcsh	2
Ncstn	3
Crhr2	3
Ddr1	2
Homer3	2
Rnf215	2
Crot	1
Kpna6	1
Man1a	3
Calr	2
Ppfia3	2
Efnb3	2
Ssbp2	1
Gstm5	1
Gstm3	1
Map3k11	2
Dnmt1	1
Ppan	2
Cacna1e	2
Cacna1b	2
Psap	3
Lpcat3	2
X9330159F19Rik	1
Tmed4	2
Ppp1cc	2
Dnajb11	2
Ndrg2	1
Mcoln1	2
Sgce	2
Myo9b	2
Adgre1	2
Plod3	2
Bcan	2
Hapln2	2
Slc25a18	1
Apba3	2
Pias4	2
Syt5	2
Mri1	2
Jkamp	2
Slc1a2	1
Ndrg1	2
Cadm3	2
Slc1a6	2
Fbxo11	1
Cic	2
Por	3
Insr	2
Adcy9	3
Mef2c	1
Eif4g2	1
Pcyt1a	1
Tomm40l	1
Apc	1
Reep5	2
Ergic3	2
Smpd4	2
Kctd20	1
Ephb3	2
Epor	2
Tmbim1	2
Pgrmc1	2
Elovl1	2
Cdc20	2
Adamts4	2
Rnf114	1
C330007P06Rik	1
Zdhhc24	2
Rundc3a	2
Slc4a3	2
Aplp1	2
P4htm	2
Zfp184	1
B4galnt1	2
Tspan31	2
Cnp	2
Sulf2	3
Sod2	1
Ezh1	1
P3h4	2
Chrd	2
Syngr3	3
Vars	2
Abhd16a	2
Neu1	2
Lsm2	2
M6pr	2
Ppp2r1a	1
Hapln4	2
Dio2	1
Ankrd26	1
Ctsd	2
Ap2s1	2
Emc10	2
Clstn3	3
Fnbp4	2
Cers4	2
Scrn3	1
Nfib	1
Ncaph2	1
Hipk1	1
Gprc5b	2
Vps72	2
Pdcl	1
Tmem184b	2
Ewsr1	2
Ap1b1	1
Rnmt	1
Tor2a	2
Fpgs	2
Bcr	1
Pou6f1	1
Cilk1	3
Taz	2
Tmem115	2
Slc38a3	2
Slc3a2	2
Spire2	2
AI597479	1
Tmem86a	2
Psen2	2
Akt1s1	2
Fsd1	1
Sptbn4	2
Gltp	2
Tnpo3	1
Adgrl1	3
Ptprs	2
Tmem175	2
Pten	1
Ehmt2	2
Med16	2
Klhl3	1
Tmem87b	3
Rbsn	1
Csf1	2
Strip1	2
Slc9a5	2
X4931428F04Rik	1
E2f4	2
Surf4	2
Dnajb9	2
Galns	3
Nolc1	1
Casd1	3
Map2	1
Cyp2j9	1
Ubl4a	1
Xk	2
Pcolce2	2
Dennd6b	2
Atf6b	2
Fam163a	1
Cacfd1	2
Lpl	3
Hspa8	1
Arnt2	1
Cers2	2
Anp32e	1
Aph1a	2
Qdpr	2
Adamtsl4	2
Dstn	1
Castor2	1
Cacna1d	3
H2.M3	3
Ctsz	2
Pls3	1
Mapkapk2	2
Lamp2	3
Scube1	2
Sdc4	1
Cntnap1	3
Psmd3	3
Taok1	1
Aldoc	1
Igfbp4	2
Tnfaip1	1
Rab11fip4	1
Elmo2	1
Wsb1	2
Serinc3	2
Pigt	2
Slc12a5	2
Ctsa	2
Retreg3	3
Sgk2	2
B4galt5	2
Rac3	2
Med1	1
Erbb3	2
Stard3	2
Vmp1	2
Ro60	1
Stk4	1
Pmp22	2
Cuedc1	2
Gid4	1
Akap1	2
Appbp2	1
Cenpv	2
Sparc	1
Crhr1	3
Fxr2	2
Zfyve27	3
Rars	1
Slc22a5	2
Arrb1	1
Sart3	2
Plod1	3
Atp6ap1	2
H13	2
Rnf145	2
Scn1b	2
Etnppl	1
Atp6v0a1	3
Calm3	2
Fkbp8	2
Arhgef25	2
Cdc37	2
Sema6a	3
Lrp11	2
Aig1	2
Grm1	2
Reep3	2
Serinc1	2
Echdc1	1
Ptprk	2
Dcbld1	2
Lin7a	1
P4ha1	2
Ube2d1	2
Slc17a8	3
Atp2b1	2
Ikbip	2
Hbs1l	1
Map7	2
Ifngr1	2
Hsp90b1	3
Ccar1	5
Fam241b	2
Tysnd1	2
Sgpl1	3
Unc5b	2
Vsir	2
Slc1a4	2
Ptprr	2
Tcf3	2
Cpm	3
Ap3d1	2
Sf3a2	2
Tmbim4	2
Dip2a	3
Ncln	3
Tpgs1	2
Erlec1	2
Hcn2	2
Cyfip2	1
Canx	3
Slu7	1
Nipal4	3
Gabrg2	3
Eif4enif1	3
Trim11	2
Rtn4	2
Septin4	2
Llgl1	3
Srebf1	2
Cox11	2
Stxbp4	1
Pdia6	2
Nbas	3
Tspan13	2
Laptm4a	2
Fam49a	5
Pum2	1
Nrcam	3
Arsg	2
Gna13	1
Abca8b	3
Adcy3	3
Dnajc27	1
Pxdn	2
Rasl10b	1
Rffl	2
Tmem132e	2
Pafah1b1	1
Sap30bp	1
Itgb4	2
Galk1	2
Aspa	2
Acox1	1
Tsen54	2
Wscd1	2
Mfsd11	3
Mink1	2
X0610010K14Rik	2
Dhrs13	2
Cpd	2
Luc7l3	2
Ankrd40	1
Cacna1g	3
Xylt2	2
Cacnb1	2
Dvl2	2
Tmem101	2
Adam11	2
Higd1b	5
Nmt1	1
Gosr2	1
Sel1l	3
Trappc6b	2
Mia2	2
Galc	2
Sptlc2	3
Vipas39	1
Akap5	1
Sptb	1
Rab15	1
Fut8	2
Rtn1	2
Serpina3n	2
X4930447C04Rik	2
Zfp36l1	2
Galnt16	3
Wdr37	1
Lgmn	2
Chga	2
Pfkp	1
Abcd4	3
Cyp46a1	2
Hhipl1	2
Wars	1
Meg3	2
Traf3	1
Klc1	2
Ggps1	1
Gpr137b	2
Zkscan3	2
Slc35b3	2
Shc3	1
Sema4d	3
Auh	2
Ctsl	2
Fam193b	2
Txndc15	2
B4galt7	3
Ptdss1	2
Adcy2	2
Tppp	1
Lpcat1	2
Clptm1l	2
Slc30a5	2
Hexb	2
Gfm2	3
Elovl7	2
Rab3c	1
Serinc5	3
Trappc13	1
Slc4a7	3
Fam107a	1
Plpp1	2
Thrb	1
Oxsm	1
Zswim8	2
Ero1l	2
Ktn1	2
Slc35f4	2
Ppif	2
Sh3bp5	2
Dph3	1
Oxnad1	1
Glt8d1	2
Kpna3	1
Ctsb	2
Gdf10	2
Cdadc1	1
Cacna2d3	3
Trim35	2
Ppp2r2a	2
Ppp3cc	2
Slc39a14	2
Hr	2
Bmp1	3
Itm2b	2
Rnf219	1
Gpr180	2
Dnajc3	2
Nipbl	1
Lrp10	2
Slc7a8	3
Pabpn1	2
Slc22a17	2
Zfr	1
Dhrs4	1
Carmil3	2
Dcaf11	1
Ctnnd2	1
Mtdh	3
Laptm4b	2
Marchf11	2
Retreg1	2
Lrp12	3
Zfpm2	1
Csmd3	3
Cdh10	3
Rida	1
Ebag9	1
Zhx1	1
Derl1	3
Sla	1
Adcy8	2
Mief1	1
Nptxr	3
Sh3bp1	2
Nell2	2
Slc38a2	2
Desi1	2
Hdac7	2
Aco2	1
Pde1b	2
Ppp1r1a	2
Txndc11	2
Litaf	2
Il1rap	2
Mgrn1	1
Srl	1
Crebbp	1
Zfp251	1
Zfp263	2
Apod	2
Hgh1	2
Dgat1	2
Fbxl6	2
Gpaa1	2
Grina	2
Ly6h	2
Lynx1	1
Lmf2	2
Arsa	3
Alcam	2
Ube2v2	1
Nde1	1
Sidt1	3
Tmem114	2
Crybg3	3
Cpox	2
Tbc1d23	1
Tfrc	2
Zfp148	5
Gsk3b	1
Abcc5	2
Clcn2	3
Pdia5	2
Thpo	2
Slc49a4	2
Dgkg	1
D16Ertd472e	3
App	2
Adamts1	2
Kpna1	1
Setd4	2
Ifnar1	2
Paxbp1	2
Scaf4	2
Nckap5l	2
Faim2	2
Asic1	2
Gpd1	1
Cers5	2
Lima1	5
Slc11a2	2
Scn8a	2
Abcc1	2
Prmt5	1
Nagpa	2
Rpp14	1
Slc38a1	2
Bsg	2
P3h3	2
Grm2	2
Scg5	2
Marchf5	2
Ache	2
Trip6	2
Pcbp4	2
Agpat4	2
Igf2r	2
Smoc2	3
Paqr4	2
Tnfrsf21	2
Slc29a1	2
Enpp5	3
Enpp4	2
Ptk7	2
Cnpy3	2
Ubr2	3
Tfeb	2
Foxp4	2
Ppil1	1
Ccdc167	5
Glo1	1
Abcg1	2
Slc37a1	2
Wdr4	1
Cbs	1
Cyp4f13	2
Ehd3	1
Ttc27	1
Pja2	1
Qpct	3
Hnrnpll	2
Cacna1h	3
Abca3	3
E4f1	2
Epas1	1
Mlst8	1
Fam234a	2
Phf1	2
Bambi	2
Zeb1	1
Tmem178	2
Slc25a46	2
Slc39a6	2
Mapre2	1
Mib1	1
Dtna	1
Cdh2	2
Tapbp	3
Ring1	2
Col11a2	2
Tap2	2
Bin1	2
Bag6	2
Npc1	3
Zfp521	5
Dhx16	2
Impact	1
Diaph1	1
Gabbr1	2
Ppp2r2b	1
Dpysl3	1
Rab27b	1
Sec11c	2
Gnal	1
Cep192	3
Ldlrad4	3
Me2	2
Sall3	5
Atp9b	3
Csnk1a1	2
Pcyox1l	2
Napg	1
Nars	1
Megf10	2
Slc12a2	2
Camk2a	1
Csf1r	3
Gnaq	1
Asrgl1	1
Fads3	2
Zfp91	1
Ccdc86	2
Tmem132a	2
Rtn3	2
Naa40	2
Ppp2r5b	2
Lipa	3
Tm7sf2	2
Syvn1	2
Il33	2
Tnks2	1
Tjp2	2
Frmd8	2
Rps6kb2	2
Chka	2
Asah2	2
Rce1	2
Slc29a2	2
Minpp1	2
Papss2	1
Vldlr	2
Slc1a1	3
Ltbp3	2
Sf1	2
Esrra	2
Rcor2	2
Tcf7l2	1
Eif3a	1
Plce1	1
Sorbs1	1
Tm9sf3	2
Slit1	2
Smndc1	2
Add3	5
Sfxn2	2
Hspa12a	1
P4hb	2
Sirt7	2
Myadml2	2
Maged1	1
Ogfod3	2
Ubtd1	2
Hps1	2
Chuk	2
Scd3	2
Poll	1
Mfsd13a	2
Hexa	2
Bbs4	1
Adpgk	3
Lztfl1	1
Maged2	1
Abhd6	2
Flnb	2
Banp	5
Kdm5c	1
Itga7	2
Esyt1	2
Baiap2	1
Rnf41	1
Aatk	2
Nab2	2
Agap2	1
Atp23	2
Gm9752	3
Ptdss2	2
Chid1	2
Tm9sf2	2
Tmc6	2
Gaa	2
Nptx1	2
Pde8a	2
Arhgef9	1
A930017K11Rik	2
Rab40c	2
Mfsd8	2
Taf3	1
Slco3a1	2
Itgb1	3
Homer2	1
Sec61a2	2
Nudt5	1
Fam20c	3
X4833439L19Rik	1
Unc5a	2
Myo5b	1
Gria4	3
Alkbh8	1
Sntg1	1
Stau2	1
Paqr8	1
Tmem70	2
Idh1	1
Creb1	5
Adam23	3
Nrp2	2
Rftn2	1
Als2	1
Trak2	1
Cflar	1
Clk1	2
Slc9a2	3
Unc50	2
Coa5	1
Tmem131	3
Sema4c	2
Plekhb2	1
Col19a1	3
Mff	2
Plcd4	1
Ppm1f	1
Dnajb2	2
Ptprn	2
Speg	2
Itm2c	2
Epha4	3
Efhd1	2
Ngef	2
Rnpepl1	2
Capn10	2
Ppp1r7	1
Atg16l1	3
Lrrfip1	2
Hdac4	1
Lypd1	1
Ccnt2	3
Tfcp2l1	1
Epb41l5	1
Tmem9	2
Tnni1	2
Slc45a3	2
Nfasc	3
Lrrn2	2
Klhl12	2
Adipor1	2
Ppfia4	1
Glul	1
Lamc1	3
Rgl1	1
Coq8a	1
Tmem63a	2
Rgs7	2
Mpzl1	3
Nme7	1
Atp1b1	2
Astn1	3
Eprs	1
Phyh	1
Optn	2
Rgs5	1
Prdx6	1
Plxdc2	2
Itga8	3
Acbd5	1
Abi2	1
Pdss1	2
Slc2a8	3
Lrsam1	1
Eng	2
Acvr1	2
Fibcd1	2
Dolpp1	2
Hspa5	3
Gsn	2
Grb14	2
Strbp	1
Abca2	2
Sapcd2	2
Uap1l1	2
Grin1	2
Pkp4	1
Frzb	2
Lpcat4	2
Depdc7	2
Ext2	2
Gatm	2
Sema6d	2
Cd82	2
Syt13	3
Chst1	2
Mapk8ip1	2
Frmd5	2
Pdia3	3
Mkks	1
Zfp106	1
Ehd4	2
Tyro3	3
Atrn	3
Slc23a2	3
Chgb	2
Spred1	1
Slc27a2	2
Usp8	1
Sppl2a	3
Mal	2
Slc20a1	3
Pcsk2	3
Rbbp9	1
Xrn2	1
Nkx2.2	2
Napb	1
Snph	1
Cdk5rap1	1
Phactr3	1
Atp9a	2
Car2	2
Col9a3	2
Zgpat	2
Pcmtd2	1
Ggt7	3
Rpn2	2
Ttc14	2
Nceh1	2
Dcun1d1	1
Ufm1	1
Mfsd1	3
Serp1	2
Slc33a1	2
Gmps	1
Olfml3	2
Sike1	2
Tspan2	3
Gdap2	1
Hmgcs2	1
Prpf38b	2
Clcc1	2
Ahcyl1	1
Slc6a17	2
Ddx20	2
Rab13	1
Crtc2	2
Chrnb2	3
Slc50a1	2
Efna1	2
Prss12	2
Rnpc3	2
Gar1	2
Glrb	2
Efna3	2
Adam15	2
Gba	2
Scamp3	2
Lmna	2
Sema4a	2
Dclk2	2
Gpr89	3
Tspan5	2
Dapp1	5
Lrrc7	1
Ddah1	1
Pip4p2	1
Cpne3	5
Pnisr	2
Ccnc	1
Epha7	3
Rnf20	1
Coro2a	1
Erp44	2
Tmeff1	2
Fmn2	1
Hsdl2	1
Ptprd	2
Slc44a1	2
Chmp5	1
Elp1	5
Pigo	2
Ccdc107	2
Npr2	2
Reck	2
Plin2	5
Sgip1	1
Cachd1	2
St3gal3	2
B4galt2	1
Slc6a9	2
Elavl4	1
Eps15	1
Nfia	1
Pum1	1
Laptm5	3
Scp2	1
Lrp8	3
Tmem59	2
Ppt1	3
Fuca1	2
Rnf220	2
Ipp	1
Akr7a5	2
Pqlc2	3
Ddost	3
Adgrb2	2
Ptp4a2	1
Azin2	2
Phc2	2
Zfp362	2
Tmem50a	2
Maco1	2
AU040320	3
Map7d1	2
Slc9a1	3
Meaf6	1
Epha10	2
Yrdc	2
Trnau1ap	2
Srsf4	2
Cdk14	1
Kcnab2	1
Pex14	2
Klhl7	1
Orc5	1
Dnajc2	2
Miip	3
Dffb	2
Rer1	2
Gabrd	2
Plch2	2
Ccnl2	2
Sorcs2	2
Lrpap1	3
Man2b2	2
Ppp2r2c	1
Stk32b	1
Ppm1g	2
Slc30a3	2
Sgcb	3
Mapre3	2
Dpysl5	1
Slc35f6	3
Rfc1	1
Srd5a3	2
Tmem165	2
Epha5	2
Polr2b	1
Pigg	2
Dipk1a	2
Tgfbr3	2
Rufy3	1
Coq2	2
Hnrnpdl	2
Tpst2	2
G3bp2	1
Uso1	1
Abcb9	2
Slc15a4	3
Scarb2	2
Zcchc8	2
Vps33a	1
Mmp17	2
Sfswap	2
Fam168a	1
Atp2a2	2
P2rx7	2
P2rx4	2
Camkk2	2
Ncor2	2
Pxmp2	1
Pgam5	2
Ankle2	2
Pus1	2
Pxn	2
St7	2
Cabp1	2
Sppl3	2
Radil	2
Fscn1	2
Plbd2	2
Dtx1	2
Ccz1	2
Cpsf4	2
Rnf6	1
Wasf3	1
Tspan12	1
Gnb2	2
Ppp1r35	2
Zkscan1	1
Exoc4	1
Fkbp9	3
Malsu1	2
Luc7l2	2
Nfe2l3	2
Zyx	2
Ephb6	3
Mkrn1	3
Pcyox1	3
Add2	1
Copg1	1
Uba3	1
Rpn1	2
Cntn3	2
Chl1	3
Sec61a1	3
Aldh1l1	1
Slc6a6	2
Sumf1	2
Ptms	2
Tmcc1	5
Ybx3	2
Grin2b	2
Ptpro	3
Strap	2
Lmo3	1
Bcat1	1
Creld1	2
Emc3	2
Atp2b2	3
Caprin2	3
Slc6a1	2
Timp4	1
Pianp	2
Ing4	3
Cd9	2
Fkbp4	2
Slc8a2	2
Vasp	2
Qpctl	3
U2af2	2
Cyfip1	1
Oca2	2
Nipa2	2
Psd3	1
Faap24	1
Prmt3	2
Pcsk6	2
Crtc3	2
Furin	2
Hddc3	1
Tyrobp	1
Ryr1	2
Pak4	2
Acan	3
Tmem126b	1
Anapc15	1
Ipo5	1
Cdipt	2
Sez6l2	2
Stard10	2
Klk10	2
Sult1a1	1
Cln3	3
Pgm2l1	1
Syt3	2
Spns1	2
Dgat2	2
Zkscan2	2
Pak1	1
BC017158	2
Tgfb1i1	1
Fus	2
Stx1b	1
Nucb1	2
Fgfr2	2
Ptpn5	3
Acadsb	1
Gga2	2
Fam53b	2
Stim1	2
D7Ertd443e	2
Atp6ap2	2
Cdk16	1
Igsf1	3
Gpc4	2
Slc9a9	3
Syp	2
Prickle3	2
Gpkow	1
Slc35a2	2
Wdr13	1
Ebp	2
Porcn	3
Dynlt3	1
Efnb1	2
Pbdc1	1
Magt1	2
Sh3bgrl	1
Pak3	1
Hccs	2
Ap1s2	2
Atp2b3	2
Plxnb3	2
L1cam	3
Plp1	2
Zcchc18	1
Tsc22d3	1
Morc4	3
Rnf128	2
Atp11a	3
Lamp1	2
Gas6	2
Col4a1	3
Col4a2	3
Saraf	3
Smim19	3
Tm2d2	2
Dctd	1
Fgfr1	2
Ash2l	2
Msmo1	3
Scrg1	1
Sh3rf1	1
Eif2ak3	2
Cdh11	2
Itfg1	2
Tecr	2
Gab1	2
Amfr	2
Mt1	1
Pllp	2
Cx3cl1	2
Mmp15	3
Tmem38a	2
Cfap20	2
Mvb12a	2
X6430548M08Rik	1
Usp10	1
Klhl36	2
X1700030J22Rik	1
Atp13a1	2
Pla2g15	3
Slc7a6	2
Smpd3	3
Gpr83	2
Kars	1
Bcar1	2
X2810004N23Rik	1
Jam3	2
Snx19	3
Aplp2	2
Nectin1	2
Cul5	1
Kirrel3	2
Abhd12	2
Cadm1	2
Zpr1	2
Dscaml1	2
Stt3a	3
C2cd2l	2
Dpagt1	2
Robo3	2
Mcam	2
Icam5	2
Ilf3	1
Tmod2	1
Nedd4	1
Fam81a	1
Cln6	2
Elovl4	2
Acsbg1	1
Imp3	2
Thsd4	3
Tspan3	2
Tmem30a	2
Hmg20a	1
Stoml1	2
Nptn	2
Rasgrf1	1
Dapk2	2
Ciao2a	1
Ppib	2
Spg21	2
Atp1b3	2
Stt3b	2
Clstn2	2
Map4	1
Scap	2
Hhatl	2
Nktr	2
Amotl2	2
Trak1	1
Ephb1	2
Rab6b	1
Trf	2
Uba5	2
Mrpl3	2
Atp2c1	2
Qars	1
Thsd7a	2
Atxn2l	2
Pygm	1
Fam189b	3
Lmo2	2
Mansc1	3
Gpbp1	1
Ilvbl	3
Gng11	2
Chrm1	3
Pdxk	1
Alox12b	5
Trpc1	2
Prr5l	2
Ugt8a	2
Acsl3	2
Fbxo21	2
Slc16a1	3
Atg12	1
Hspa13	2
Ift57	2
Inha	2
Chpf	2
Sox10	2
Asic4	2
Afap1l1	2
Ankrd54	2
Pygb	1
Pfkm	1
Gas7	1
Entpd6	3
Triobp	2
Apmap	3
Gga1	2
Slc22a15	2
Atp1a1	2
Mgll	1
Tmed7	2
Lpcat2	2
S100b	1
Hsf4	2
Kctd17	2
Ptprf	3
Ctdp1	2
Chst2	1
Atp6v0b	2
Armcx2	1
Lpar6	2
Zbtb1	2
Crlf2	2
Adgrb3	3
Tmem35a	2
Fa2h	2
Reep4	3
Spata2l	3
Lgi3	2
Hacd3	2
Gabrb3	2
Lrrc24	2
Sfxn5	1
Emx1	2
Lrrc14	2
Rbm4b	2
Tmem131l	3
Nrxn2	2
Exoc6b	1
Alg3	2
Kcnk10	2
Ccp110	2
Gde1	3
Jcad	1
Slc16a2	2
Cdkl4	1
Gria2	3
Kcnk1	3
Galnt17	2
Gpbp1l1	1
Phka1	1
Meak7	1
Tpst1	2
Srsf2	2
Pomt2	2
Exoc3	1
Tspoap1	2
Lrrc58	1
Emid1	2
Ccnd3	2
Irf2bpl	2
Faah	3
Rhbdd3	3
Nsf	1
Chmp7	2
Polq	2
Efcab14	3
Gpc1	2
Rhov	2
Foxj1	2
Agpat1	2
Zdhhc14	3
Dnajc17	2
Trim59	2
Tbc1d10a	2
Neurl1b	1
Pkd2	2
Edil3	2
Zfp395	2
Ccpg1	2
Inpp5j	2
Chst11	2
Pik3ip1	2
Mtrr	1
Ankrd12	1
Lrrn1	2
Cacna1a	3
Tmem109	2
Fam171a2	2
Fras1	3
Gns	3
Grn	2
Ttyh2	2
Tmx4	2
Tmub2	2
G6pc3	2
Larp6	2
Acot11	1
Cactin	2
Cog3	2
Sidt2	3
Pygo1	1
Dhcr24	3
Zfr2	2
Atcay	1
Vat1	2
Eef2	1
Xkr6	2
Arhgap5	1
Eif2s3x	1
Ap2b1	1
Sppl2b	2
Leprot	2
Rims4	1
Pdk3	2
Helq	2
Gdpd5	2
Lzts2	2
Kcnh4	2
Hacd2	3
Tmem98	2
Myo1d	2
Mbd3	2
Plk5	2
Reep6	2
Cox18	2
Gnptg	2
Leng8	2
Tsen34	2
Mboat7	2
Zcchc7	2
Thrsp	1
Abca7	3
Dagla	2
Zdhhc17	3
Pim3	2
Plppr3	2
Syt1	2
Zhx3	1
Cd276	2
Pknox2	1
Tmem59l	2
Ints6l	2
Rusc2	2
Fam214b	2
Tmtc2	3
Tmem63b	2
X5031439G07Rik	3
Slc2a6	3
Zranb3	1
Dgkb	1
Myrf	2
Acaa1a	2
Dipk1b	2
Rorb	1
Armh4	3
Fstl4	2
X9530068E07Rik	2
Slc2a13	3
Qsox2	2
Tmem260	2
P2ry13	2
Gng12	1
X9530077C05Rik	1
Pcdh8	2
Tbcc	2
Thap11	2
Arhgap26	1
Rnf39	2
Rnf13	2
Cdh8	3
Slc38a7	2
Fgf1	1
Chst12	2
Atp13a2	2
Mag	2
Tcaf1	1
Kcnk9	3
Dner	2
Wdr44	1
Decr2	1
Sun1	3
Dchs1	2
X2410004B18Rik	2
Arhgap33	1
Arhgef26	1
C1ql2	2
Unc93b1	2
Nfkbid	2
Rab8b	1
Lrfn3	2
Smpd1	3
Scd1	1
Rnf139	2
Slc35b2	2
Prmt9	2
Myom3	1
Ppp1r14a	2
Mycn	2
Syn1	2
Mxd4	1
Clic4	2
Zfp692	3
Hgsnat	2
Rsrp1	2
Galnt6	2
Ldlrap1	2
Ttc13	2
Tap1	2
Larp1	1
Fam53a	2
Slc12a9	2
Kdm6a	1
Enpp1	2
Ctbp1	2
Atp11b	3
Endod1	3
Vgf	2
Slc30a1	2
Azin1	1
Fbxo27	2
Uggt1	3
Zmat4	1
Zdhhc18	2
Kcnh3	2
Clba1	2
Bclaf1	1
Cldn11	2
Slc20a2	2
Inf2	2
Atp8a1	2
Ahdc1	2
Cd81	2
Mrps26	2
Ppp1r16b	1
Actr5	2
Slc32a1	2
Fam76b	2
Tspan14	3
Ppm1k	1
Zfp365	1
Ackr1	3
Dusp8	1
Ankrd9	2
Scarb1	2
Ano10	2
Card19	2
Rara	2
Slc24a2	3
Phf2	2
Kcnj9	2
Igsf8	2
Smim3	1
Mturn	1
Galnt11	2
Phf20	1
Camk4	1
Tmem181a	3
Ormdl3	2
Spon1	3
Enpp6	2
Slc43a2	3
Mfsd14b	2
Sema7a	2
Slc22a23	2
Iffo1	2
Ostm1	2
Galnt18	2
Afg1l	5
Edem2	2
Kcnh2	3
Tsr1	1
Pigu	3
Gpr162	2
Cdc16	2
Uqcrfs1	2
Socs7	1
Sv2a	3
Ptov1	2
Mfsd4b1	2
Reep2	2
Tctn1	2
Ripor1	1
Tm6sf1	2
Degs1	2
Ctss	2
Lpar1	2
Josd2	2
Mapkap1	2
Mboat1	2
Shank1	1
Abcf1	5
Cnot4	1
Rap1gap2	1
Agbl3	1
Ctu1	2
Zfp653	2
Ube2l3	1
Ube3c	5
St6galnac5	2
Pigk	3
Rreb1	2
Marchf6	3
Camk1d	1
Sart1	2
Stim2	2
Ube2h	1
AW209491	1
Rlbp1	1
Adk	1
Zdhhc1	2
Arid4b	2
Pomt1	3
Npepl1	2
Azi2	2
Rftn1	2
Atp6v0e2	1
Cdh6	2
Alg1	2
Slc9a8	2
Wfs1	2
Tusc3	2
Mmd2	1
Ncam1	3
Ubald1	2
Tmem246	3
Vasn	3
Rxrb	2
Dusp26	3
Ldb2	1
Plekhg5	2
Cplx3	1
Alg2	2
Thap3	2
Dnajc28	1
Cep131	2
Gabbr2	3
Tbc1d2	2
Nhsl1	1
Slc45a1	3
Mcph1	1
Lrrc17	1
Gpr37	2
Dag1	2
Clstn1	3
Plpp6	2
Mettl11b	1
Cacna2d1	3
Abcc8	2
Ndp	1
Maob	1
Kcns1	2
Scamp2	3
Zfp704	1
Kyat3	1
Gpr34	2
Tm7sf3	2
Lrp1	3
BC052040	5
Suco	2
Sec1	2
Cacng5	3
Slc25a28	2
Hipk4	3
Pitpnc1	1
Os9	2
Dxo	2
Ltbp4	2
Pvr	3
Necab1	1
Ckap5	1
Otud6b	1
Plppr2	2
Pck2	1
Erc2	1
Rimklb	1
Dnajc16	3
Cyp2s1	2
Scamp5	2
Eif4h	2
Cept1	2
C1qtnf4	2
Tex264	2
Plekhh2	2
Gfer	2
Atp1a3	3
Slc16a11	2
Arhgef1	2
Tet2	3
Abhd4	1
Nacad	2
Msantd4	1
Smc1a	1
Pnmal1	1
Arhgap12	1
Chd7	2
Vps41	1
Car8	1
Rusc1	3
Nkx6.2	2
Rap1gap	2
Tmem29	1
Ssr2	3
Ccdc9	2
Ninj2	2
Pik3r1	1
Mfsd6	2
Arhgap32	1
Gpr12	2
Stx3	2
Cep78	2
Sox5	1
Disp3	3
Ddx24	1
Slc39a11	2
Prima1	2
BC006965	1
Lrrc29	2
Amot	1
Lhfpl1	2
Mpped1	1
Slc24a4	2
Ydjc	2
Phlda3	2
Abca8a	2
Ptpre	3
Fhdc1	2
Ankrd13a	2
Lman1	2
Slc16a6	2
Metap1d	2
Rnpep	2
Fam222a	3
Agrn	3
Arhgef11	1
Elmod1	2
Rapgef5	1
Zbed3	3
Sln	3
Wdr60	2
Arsb	3
Zfp239	1
Vwa1	3
Msantd2	3
Tbc1d22b	2
Specc1	5
Crtac1	2
Nfkbil1	2
Reln	3
Tbc1d10b	2
Sdhaf3	1
Pwwp3b	1
Dnal1	1
Sun2	2
Golga7b	1
Adprhl2	2
Dhrs7b	2
Mier2	2
Ipo11	1
Safb2	2
Pla2g6	1
Rgs8	1
Ypel3	2
Sipa1l1	1
Naa25	1
Nmnat2	1
Tmem108	2
Krba1	2
Zfp513	2
Upf2	1
Pigv	2
B3galnt1	2
Tmem130	2
Gjc2	3
Elfn2	2
Tril	3
Pde12	2
D830025C05Rik	2
Rtn4r	2
Adamtsl5	2
Ccdc84	3
X2900052L18Rik	2
Gls2	3
Pcdhb21	2
Irf2bp1	2
Als2cl	5
S100a1	1
Pheta1	2
Nkrf	1
Gpr146	2
Kcnj4	2
Ackr3	3
Phlpp1	3
Slc25a53	1
Snhg11	3
Dock5	2
X2510039O18Rik	2
Tram1l1	2
Smim7	1
Rnf208	2
Zfp612	1
Tmem201	2
Gemin7	2
Serpinb1a	2
Fads6	3
Prrt3	2
Megf8	2
Rnf216	5
S1pr5	2
AI467606	2
Amer3	1
Borcs6	2
Med26	2
Zfp688	2
Lca5l	2
Rtn4rl1	2
Nyap1	2
Kcnk13	2
Sys1	2
Penk	3
Glb1	3
Zfp553	2
Pigz	2
Cdc42ep2	2
Mfsd5	2
Sprn	2
Paip2b	1
Gpr158	2
Onecut2	2
Pofut1	3
Snx12	1
Lrrc8d	2
Hpcal4	1
Chrm3	2
Olig1	2
Gldn	2
Cd109	2
Pnma2	1
Ermp1	2
Zfp322a	1
Asphd1	2
Pcdhb17	3
Camk2n1	1
Cox17	2
Ar	1
Fam43a	2
Prr12	2
Cxxc5	2
Mapk10	1
Zfp787	2
Slc39a3	2
Fbl	2
Mbtps2	3
Atxn1	1
Tapt1	2
Nipa1	2
Mageh1	1
Flrt2	2
Dlk2	2
Zfp30	2
Klhl34	1
Tmem41b	3
Lxn	1
Rnf150	2
Lix1	1
Slc38a9	2
Gjb1	2
Ccdc88b	2
Ankrd16	2
Kcna1	2
Gigyf2	1
Tmem196	1
Arxes2	2
Taf13	1
Nwd1	1
Selplg	2
Amigo2	3
Rnf149	2
Gng7	1
Syngr2	3
Ric3	2
Arxes1	2
Phldb1	2
Tprn	2
Insc	3
Slc35e4	2
Hexim1	2
Fkrp	2
Prex2	1
C1galt1c1	2
Nrsn1	1
Rapgef4	1
Plcxd3	1
Tex50	2
Lrp1b	3
Iba57	2
Zfp219	2
Sorl1	3
Tenm2	3
Retreg2	2
Ogfr	2
Tmem200a	2
Zfp260	1
Pls1	2
Cdc42ep1	2
Lingo1	2
Grm5	2
Omg	2
Slc17a5	2
Morn4	1
Gal3st1	2
Calhm5	2
Slc35c1	3
Ankrd55	1
Tmx2	2
Klk6	2
X1600012H06Rik	2
Opalin	2
Slc25a44	1
Eif5a2	5
Evc2	2
Carmil2	2
Snx21	2
Fam241a	2
Lrrc4c	1
Tmem150c	2
Scg2	3
Slc29a4	2
Tmem125	2
Tatdn1	1
Amigo1	2
Selenon	2
Hs3st1	3
Olfml1	2
Gprc5c	2
Lingo3	2
Fam71e1	2
Eml5	2
Islr2	2
Pcdh19	2
Cacna1c	2
Gfod1	1
X2900026A02Rik	1
Pcdh1	2
Zbtb22	2
Vamp7	1
Crebzf	2
Kcnj16	1
Fam181b	2
Zfp579	2
Tmem198	2
Ttn	3
Sox12	2
Tbc1d22a	1
Sox6	1
Prdm9	5
Mtcl1	2
Plpp2	2
Pld4	2
X5330438D12Rik	2
Cx3cr1	2
Atp6v1a	1
Nav2	2
Robo2	3
Pbx1	1
D930048N14Rik	2
Dlg2	1
Adam17	3
Plekhg3	2
Rnf103	2
BC004004	2
Repin1	2
Junb	2
Reep1	2
Lamb2	2
Creb5	2
Cntn2	3
Tmem248	2
Styx	2
Aldh1a1	1
Ficd	2
Cacng8	2
Ggcx	3
Tnfaip6	3
Tcf4	1
Shisa7	2
Aldh7a1	1
Tmem39b	2
Lysmd1	1
Tmem179	2
Krt15	2
Spock3	2
Rhob	2
Tmem120b	2
Kcnn2	3
Dedd2	2
Slc8a1	3
Tmem119	2
Phactr1	1
Set	1
Usp46	1
Smim10l2a	2
Pcnx3	2
Klhl5	1
Gabrg3	3
Gabra5	2
Arntl	2
C1ra	2
Gm9967	2
Nell1	2
Pcdh9	3
Srsf11	2
Cd47	2
Zcchc24	1
Zfp580	2
Slain1	2
Abcd2	5
Gm5160	1
Emc7	2
Prr18	2
Zkscan5	1
Mia3	2
Otulinl	2
St3gal5	2
Cnot10	2
Pgpep1	1
Spock1	2
Slit3	2
Tug1	1
Them6	2
Kdm5d	2
Gm11696	2
Elmod3	1
Nbeal2	2
Grm7	2
St8sia3	3
Gjc3	2
Ero1lb	2
Zfp180	1
Scn3a	2
Slc44a2	3
Bcl2	1
Uxs1	2
Las1l	1
Spop	1
Pus7	3
Zfp317	1
Eif1a	1
Abat	1
Gstm1	1
Sez6l	3
Arhgap35	1
[truncated: 7,837 more rows]

## Sheet: 6c-KO Est-Male DEGs-WT,KO clust
genes	cluster
Scmh1	1
Ngfr	2
Drp2	1
Gmpr	3
Arvcf	3
Rtca	3
Ddx3x	1
Usp32	1
Fmr1	1
Gm38393	1
Chtop	2
Snapin	3
N4bp3	3
Mfsd10	3
Rrp15	3
Tcf25	3
Nom1	3
Chordc1	1
Siae	4
Emd	5
Kmt2a	1
Trappc6a	3
Celf2	5
Smg9	3
Rmnd5a	1
Peg3	1
Tmem161a	3
Dyrk1b	3
Atg4d	3
Hdgfl2	3
Nab1	1
Pnkp	3
Med25	3
Cdkn1b	1
Atp5d	3
Ppp5c	3
Cdk12	1
Yju2	3
Ranbp2	1
Car11	3
Ddx23	5
Rabac1	3
Prkcsh	3
Paf1	3
Bicd1	1
Impdh1	3
Ess2	3
Dgcr6	3
Fosb	5
Kpna6	1
Ppfia3	3
Lin7b	3
Ppan	3
Kifc2	3
Utp20	5
X9330159F19Rik	1
Slbp	3
Apba3	3
Matk	3
Dtx2	3
Syt5	2
Ubqln1	1
Fbxo11	1
Ndufs3	3
Psmd4	3
Ampd3	4
Bcas2	3
Tfap4	3
Psmb4	2
Apc	1
Ncoa2	1
Osgep	2
Cdc20	3
P4htm	3
B4galnt1	3
Cnp	3
Abhd16a	3
Tinf2	3
Homer1	1
Ccdc124	3
Zmiz1	1
Fzd3	1
Mid1ip1	2
Ap2s1	3
Fhl2	2
Arpc5	2
Nfib	1
Vps72	3
Cabp7	3
Ewsr1	3
Ube2g2	3
Tnpo1	1
Myod1	3
Mrtfb	1
Cbx5	1
Dmap1	3
Bcr	1
Slc3a2	3
Prox1	1
Tmem86a	3
Myt1	1
Pgam1	3
Zfp715	1
Atp6v0d1	3
Nelfb	3
Ndufs2	2
Sh3bp5l	3
Anapc1	1
Tsg101	3
Ankrd52	1
Wdfy2	5
Nol3	3
Tsr3	2
Mtmr1	1
Map2	1
Sash1	1
Atf6b	3
Qdpr	3
Tnr	1
Sqstm1	2
Macroh2a1	1
Lonrf3	4
Ppdpf	3
Eef1a2	1
Taok1	1
Top2b	1
Igfbp4	2
Zfp334	1
Crk	1
Rrp7a	3
Ints2	1
Med13l	1
Baiap2l2	3
Mafk	3
Uchl5	3
Ro60	1
Mtmr4	1
X6330403K07Rik	3
Adora2b	2
Ncor1	1
Sp2	3
Pank3	1
Pelp1	3
Dalrd3	3
Map1s	3
Fkbp8	3
Gipc1	3
Cdc37	3
Rab4a	3
Slc6a8	1
Ubxn6	3
Ccdc12	3
Lyst	1
Stxbp5	1
Mtres1	3
Aig1	3
Rev3l	1
Tnfaip3	5
Arfgef3	1
Pkib	3
Hsf2	1
Sirt1	1
Fam241b	3
Eif4ebp2	1
Slc16a7	1
Rab21	1
Thap2	1
Frs2	1
Sf3a2	3
Vps13d	1
D10Wsu102e	4
Wdr82	1
Cfap410	3
Xpo1	1
Nsg2	3
Cpeb4	1
Tpgs1	3
Rufy1	3
Cdkn2aipnl	2
Cfap36	2
Pold2	3
Dbnl	3
Ccdc117	1
Dynll2	1
Prpsap2	2
Tspan13	2
Rock2	1
Pum2	1
Gna13	1
Itsn2	1
Ncoa1	1
Pxdn	1
Nf1	1
Helz	1
Slc9a3r1	2
Pafah1b1	1
Recql5	5
Itgb4	3
Galk1	3
Mrpl38	3
Klhl28	1
Strn3	1
Ralgapa1	1
Nin	5
Vti1b	3
Arg2	3
Trip11	5
Lgmn	3
Chga	3
Ppp4r4	1
Ylpm1	1
Fos	1
Yy1	1
Tecpr2	4
Zfyve21	3
Mtr	1
Prl	1
Nup153	1
Txndc15	3
B4galt7	3
Zfp369	1
Cetn3	2
Smad5	1
Col4a3bp	1
Iqgap2	1
Pde8b	1
Zfyve16	5
Kctd6	1
Plpp1	3
Kat6b	5
Ube2e1	2
Oxsm	4
Rtraf	2
Dnajc9	3
Anxa7	3
Mapk1ip1l	1
Ogdhl	1
Mapk8	1
Dcp1a	5
Micu2	4
Slc25a30	1
Nufip1	3
Stmn4	3
Itm2b	3
Uchl3	2
Rbm26	5
Nup155	4
Psmb5	3
Golph3	4
Emc9	3
Trio	1
Baalc	5
Zfpm2	1
Rad21	1
Dnal4	3
Sh3bp1	3
Samm50	3
Adamts20	1
Pde1b	3
Ppp1r1a	2
Sharpin	3
Ly6h	3
Dubr	5
Trmt2a	3
Senp5	1
Fgd4	1
Osbpl11	1
Usp25	1
Mrpl39	3
Dyrk1a	1
Pigp	3
Cfap298	3
Faim2	3
Denr	3
Bsg	3
Ache	3
Pcbp4	3
Chd1	1
Pde10a	1
Phf10	1
Flywch2	3
Cnpy3	3
Foxp4	3
Lpin2	1
Lbh	3
Vapa	1
Dnase1l2	4
Luc7l	1
Taf11	3
Rock1	1
Mib1	1
Zfp871	1
Bin1	3
Map3k2	1
Rbm27	1
Spire1	1
Setbp1	1
Mapk4	1
Sall3	4
Gm16286	3
Txnl1	3
Nedd4l	1
Camk2a	1
Cndp2	3
Incenp	3
Osbp	1
Zfp91	1
Atl3	4
Rcl1	3
Snx15	3
Zfpl1	3
Vps51	3
Tm7sf2	3
Tnks2	1
Rps6kb2	3
Klc2	3
Rab1b	3
Papss2	1
Drap1	3
Rcor2	3
Tcf7l2	1
Plce1	1
Noc3l	1
Lcor	1
Smndc1	2
Pcgf6	5
Slk	1
Myadml2	2
Pi4k2a	5
Entpd7	5
Oga	1
Mfsd13a	3
Arih1	1
Huwe1	1
Fam120c	1
Jph3	3
Ube3a	1
Kdm5c	1
Atp5b	2
Dctn2	3
Agap2	1
Clns1a	2
Ric8a	3
Cbx8	2
Mkln1	1
Usp16	2
Arhgef9	1
Cnksr2	1
Pgm1	3
Hgs	3
Creb1	1
Ikzf2	1
Lancl1	2
Raph1	5
Trak2	1
Cflar	4
Npas2	5
Zfp142	1
Agfg1	1
Pnkd	3
Trip12	1
Itm2c	3
Nppc	3
Ndufa10	3
Stk25	3
Relch	1
Htr4	5
Pam	1
Lypd1	1
Cdc73	1
Ptpn4	1
Xpr1	1
Glul	1
Cdc42bpa	1
Ahctf1	1
Acbd3	1
Desi2	1
Pycr2	3
Mpc2	3
Dcaf6	1
Abl2	1
Atf6	1
Uhmk1	1
Dnajc1	1
Abi2	1
Eng	3
Nr4a2	1
Acvr1c	1
Tor1a	2
Sec16a	1
Nckap1	1
Emc4	3
Dnajc24	3
Elp4	2
Trim44	1
Zfp106	1
Chac1	2
Spred1	1
Snrpb	2
Rbck1	3
Kif3b	1
Zdbf2	5
Arfgap1	3
Nfs1	3
Tbl1xr1	1
Rprd1b	1
Ralgapb	1
Skil	1
Pik3ca	1
Pex5l	1
Ttc14	5
Ncoa3	1
Dhx36	1
Kpna4	1
Dclk1	1
Nbea	1
Tsc22d2	1
Gstm4	2
Ahcyl1	1
Slc35a3	1
Trim2	1
Ash1l	1
Lmna	3
Naxe	3
Lrrc7	1
Mmp16	1
Ubxn2b	1
Xpa	3
Coro2a	5
Erp44	3
Pappa	1
Ptbp3	1
Alad	3
B4galt1	1
Dctn3	3
Ccdc107	3
Sgip1	1
Nfia	1
Pum1	1
Lrp8	5
Tceanc2	1
Lypla2	3
Hpca	3
Syf2	3
Ncdn	3
Ago3	1
Trappc3	3
Nudc	3
Pex14	3
Fbxo44	3
Mthfr	5
Pex10	3
Rer1	3
Htt	1
Stx18	3
Rab28	2
Dnajb6	3
Fosl2	1
Slc4a1ap	3
Eif2b4	3
Pds5a	1
Clock	1
Hnrnpdl	3
Tpst2	3
Arl6ip4	3
Rimbp2	5
Rhof	3
Anapc7	3
Camkk2	3
Snx8	2
Actb	1
Zfp12	1
Ddx54	3
Pan3	1
Actl6b	2
Tsc22d4	3
Klhdc10	1
Tra2a	1
Ccdc184	3
Gfpt1	1
Dusp11	1
Zfp638	1
Prickle2	1
Kbtbd8	1
Pole4	3
Aplf	2
Edem1	1
Gabarapl1	3
Atf7ip	1
Wbp11	3
Srgap3	1
Kras	1
Etnk1	5
Tmtc1	1
Tamm41	3
U2af2	3
Psd3	1
Asb7	1
Mef2a	1
Nfkbib	3
Me3	3
Smg1	1
Nucb2	3
Pde3b	5
Cdipt	3
Nfatc2ip	1
Fus	3
Lamtor1	3
Ubfd1	1
Usp9x	5
Syp	3
Pim2	3
Rps6ka3	1
Chic1	1
Rbbp7	3
Tceal6	2
Gins4	3
Tm2d2	3
Klhl2	1
Sorbs2	1
Smarca5	1
Cfap20	3
Mvb12a	3
Babam1	3
X6430548M08Rik	5
Pik3r2	3
Rab3a	3
Lsm4	3
Pbx4	3
Vps4a	3
Vstm5	3
Tmem170	1
Bcar1	3
Sprtn	5
Sesn3	1
Usp2	3
Fem1b	1
Csnk1g1	5
Xrn1	1
Tfdp2	4
Rwdd2a	3
Mras	1
Mon1a	3
Ip6k1	1
Prkar2a	1
Amt	1
Srek1	1
Crebl2	1
Fam189b	3
Ccdc88a	1
Cdv3	5
Slc10a3	3
Ank2	1
Ppp1r9a	1
Pebp1	3
Mycbp2	1
Asic4	3
Ogfod1	5
Trim33	1
Afap1l1	3
Gga1	3
Arid2	1
Hsf4	3
Trappc8	1
Clasp2	1
Larp4b	1
Pcgf3	1
Cep350	1
Fcsk	3
Lrrc24	3
Vav3	1
Lrrc14	3
Egr3	1
St18	1
Exoc6b	1
Ephx4	3
Tmem87a	1
Parl	3
Mga	1
Jcad	1
Zbtb41	1
Pds5b	1
Mks1	3
Sik3	1
Ogt	5
Rhbdd3	3
Exosc4	3
Dnajc17	3
Med13	1
Cbl	1
Diaph2	1
Ice1	5
Hdx	1
Zfyve9	1
Tent4a	1
Ppp1r18	3
Pik3ip1	3
Rxylt1	2
Zyg11b	1
Tiparp	1
Cnot6l	1
Mrps10	3
Sirt6	4
Dusp5	5
Celf5	1
Larp6	3
Acot11	1
Sncb	3
Dop1a	1
Foxn2	1
Mtmr9	1
Arhgap5	1
Eif2s3x	1
Ap2b1	1
Tanc1	1
Sppl2b	3
Ccdc106	3
Scai	1
Plekhj1	3
Vps13c	1
Nat14	3
G2e3	5
Gnptab	1
Midn	5
Rsf1	1
Rnf38	5
R3hdm4	3
Plppr3	3
Lysmd3	1
Ids	1
Dock4	5
Tmem59l	3
Fnip1	1
Mettl25	3
Tmem63b	3
Fmnl2	1
Slain2	1
Arl5a	1
Dgkb	1
Lrrk2	1
X9530068E07Rik	3
Hif1an	4
Tbc1d24	1
Btg1	1
Rnf39	2
Cnot1	1
Eepd1	3
Mag	3
Ago2	1
Cysrt1	2
Cuedc2	3
Fam135b	1
Amdhd2	3
Zfp280c	1
Lrfn3	3
Bcorl1	5
Otud4	1
Zfp113	1
Smpd1	3
Slc35b2	3
Setd7	1
Dennd11	1
Atg101	3
Fam193a	1
Hook3	1
Mxd4	5
Lsm1	2
Taf2	1
Kdm6a	1
Dmxl1	1
Ubr5	1
Ppfia1	1
Bcdin3d	3
Shank2	1
Mcrs1	3
Zfp60	1
Prkci	1
Phc3	1
Cd81	3
Smim14	2
Nufip2	1
Egr2	1
Jmjd1c	5
Ninj1	3
Wipf2	1
Igsf8	3
Mrm3	3
Kmt2c	1
Ormdl3	2
Ttc39b	1
Fam126b	1
Prkab2	1
Glra3	1
Nos1ap	5
Socs7	1
Zfp280d	1
Ubn2	5
Cep85l	1
Dock10	1
Mcl1	1
Josd2	3
Nup205	5
Lefty1	3
Zcchc2	1
Shfl	3
Sccpdh	3
Supt3	3
Ube3c	1
Adrm1	3
Psmd7	2
Shd	3
X1110008P14Rik	3
Abhd2	1
Fn3krp	1
Picalm	1
Alg1	3
Ubn1	1
Ubald1	2
Myo9a	1
Mrpl12	3
Plekhg5	3
Wdr34	2
Cpeb2	1
Zfp597	1
Epg5	4
Zfp800	1
Pcif1	2
Rere	1
Heca	1
Cited2	1
Hip1	1
Ankrd13c	1
Magi2	1
Lats1	1
Elavl1	1
Baz2a	1
Gramd1b	1
Gas8	3
Prrc2c	1
Hey1	2
Fam102b	5
Dtx3	3
Cdh18	5
Usp45	1
Arglu1	1
Os9	3
Dxo	3
Tsfm	3
Zfp609	1
Plppr2	3
Btaf1	1
Erc2	1
Tasor	1
Oaz2	3
Phc1	1
Eif4h	3
Rnf167	3
Iqsec3	1
Tex264	3
Sft2d2	1
Psme4	5
Reps2	1
Ino80d	1
Rfx3	1
Fam117b	1
Wwp1	1
Hectd2	5
Rpusd1	3
Zfp236	1
Nkx6.2	3
Rap1gap	3
Ccdc9	3
Pik3r1	1
Arhgap32	1
Gpr12	3
Irf8	3
Ago1	1
Nop53	2
Camsap2	1
Cdc42ep4	2
Slc39a11	3
Rims1	1
Fcho2	4
Amot	4
Btbd7	1
Ubac2	3
Haus1	3
Rapgef5	1
Dstyk	1
Cox10	3
Gm9774	3
Tent2	1
Zfp451	1
Kdm5b	1
Bag2	3
Grk3	5
Specc1	1
Snx18	1
Gatad2b	1
Zmym6	1
Ago4	1
Mier2	3
Sh2b3	4
Kdm7a	1
Hirip3	3
Alkbh5	1
Rgs8	1
Sipa1l1	1
Atpaf2	3
Trafd1	3
Bmt2	1
Bex2	2
Smg7	1
Borcs5	3
Pyurf	3
Upf2	1
Tmem64	1
Rnf227	3
Zmym1	1
Trp53bp1	1
Rell2	3
Tceal3	2
Rnf208	3
Csrnp3	1
Setd2	1
Tubg2	3
Ccdc73	1
Cirbp	3
Lrrc3b	3
Zfp688	3
Klhdc9	3
Dcaf12l1	3
Trim39	1
Trrap	1
Pcdhb3	1
Tssc4	3
B230219D22Rik	1
Cradd	3
Adra1a	1
Mosmo	1
X9930021J03Rik	1
Vps13a	1
Bex3	3
Ppm1e	1
Nexmif	1
Bdh1	3
Ttc34	3
Hmga1	3
Fbl	2
Mars2	1
Zfp445	1
Ngrn	2
Cltc	1
Zfp654	1
Samd14	3
Dusp18	1
Neurl4	1
X8030462N17Rik	1
Zfp30	3
Cltb	3
Ripply2	2
Gigyf2	1
Isg20l2	5
Rbm15	1
Nwd1	1
Selplg	3
Mcmbp	1
Rbm33	1
Zfp738	1
Ctxn1	3
Foxo3	1
Slc35e4	3
Lonrf2	1
Phf3	1
Tada3	3
Bmyc	3
Ankrd34a	3
Frmpd4	1
Pdp1	1
Zfp219	3
Smcr8	1
Kmt5a	1
Ogfr	3
Aff4	1
Ctu2	3
Zfp644	1
Urgcp	3
Zfp646	1
Vcpkmt	3
Nudt6	3
Rictor	1
Carmil2	3
Fam131a	3
Tmem125	3
Hs3st1	3
Sv2c	1
Pcmtd1	1
Gfod1	1
Plpp7	3
Zbtb22	3
Irf2bp2	1
Ufsp1	3
Tmem198	3
Wdcp	1
Xrcc1	2
Prdm9	1
Dock8	1
Rbm12b2	1
Mpp3	3
Tchh	2
Asna1	3
Nav2	5
Gan	1
Hook2	3
Dlg2	1
Gm9885	3
Asap2	1
Zfp212	3
Glis3	1
Gm6180	3
Gatd3a	3
X3110082I17Rik	3
Dennd4a	1
Nebl	1
Chd8	5
Ubxn7	4
Tceal5	3
Skp2	5
Fgfr3	1
Prr14l	1
Pnma1	3
Mdm4	1
Tmem120b	3
Mettl7a1	1
Tmem119	3
Fsd1l	1
Nyap2	1
Ep300	1
Ddx17	5
Sugct	3
Tead1	1
Fut9	1
Nap1l5	3
Ano5	5
Pprc1	4
Cpsf6	1
Zcchc24	1
Unc80	5
Kbtbd11	1
Tmem191c	3
Eef1d	3
Izumo4	3
Per2	4
Zfp277	2
Emc7	3
B4galt6	1
Cfl1	3
R3hdm1	5
Cebpg	1
Usp34	1
Med12l	1
Rlim	1
Kdm5d	2
Acbd4	3
Cep170	1
Ryr3	5
Prdm2	1
Sptan1	1
Zfp329	1
Mdn1	5
Arhgap35	1
Gda	1
Egln2	3
Sh2d3c	3
Csf2ra	3
Max	1
Arhgef12	1
Flot1	3
Ap2a1	3
Chst8	3
Wtap	1
Nr1h2	3
Marf1	1
Lrrtm1	3
Arl1	3
Rrp1	3
Haghl	3
Fnip2	1
Mmgt1	1
Nol4l	5
Snrpa	3
Zfp229	4
Ksr2	1
Akap6	1
U2af1	3
Mospd2	1
Ssbp3	1
Slc25a3	2
AI413582	3
Klhl24	1
Manbal	3
Zfp26	1
Pstk	3
Usp31	1
Stk24	1
Arhgap22	3
Klhdc3	3
Sox11	1
Hspbp1	3
Zkscan8	1
Pym1	3
Ipcef1	1
Mocs1	2
Plcxd1	3
Zfp428	3
Clasp1	1
Kndc1	5
Pomgnt2	3
Msl2	1
Gm10167	3
Zfp932	1
Hes6	3
B3galt4	3
Syngap1	1
Arfgef1	1
Afdn	1
X1500009C09Rik	3
Pick1	3
Usf3	1
Ddrgk1	3
Uty	3
Clec16a	1
Sf3b4	3
Ddx3y	2
Eif2s3y	3
Ank3	1
Marcks	1
Arid1b	1
Cacng7	4
Gm12166	3
Fcho1	3
Rasal2	1
Utp3	2
Fryl	1
Dgkd	1
Zfp827	1
Yipf3	3
Tia1	5
Map3k5	1
Hpcal1	3
X2510002D24Rik	3
Ubxn1	2
Cdr1os	1
Septin5	3
Phf20l1	1
Fzd10os	3
Lrrc61	3
H2.D1	3
Dok6	1
Rhog	3
Snrnp40	2
Zfp94	2
BC029722	3
Myh7b	3
Tspyl3	2
Plxnc1	1
Hps6	3
Lcmt2	3
Ptar1	1
Grem1	1
Rc3h2	1
Gm7935	3
Klhdc7a	1
Ctdsp2	1
Dohh	3
Ddi2	5
Zfp995	3
Prnp	3
Rab26	3
Gm12219	3
Gm5913	3
Ccdc85c	1
Gm12940	5
Oip5os1	1
Gm15912	3
Xist	5
Gm13530	3
Emx2os	3
X5530601H04Rik	1
Kantr	1
Slc5a3	5
Dlx6os1	1
Ttbk2	1
Ccdc71l	1
Hspa1a	3
Purb	1
D430019H16Rik	1
AC149090.1	5
Syne1	1
Tmem147os	3
X9030407P20Rik	3
X1810014B01Rik	3
Rian	5
Jpx	5
Gm2115	1
Ccdc166	2
Kctd12	1
Atf7	1
X2810402E24Rik	3
Snhg14	1
X9130401M01Rik	3
Gm38380	5
Gm32444	5
Gm37499	1
Gm20045	5
Gm37313	1
Gm37254	1
Gm43668	1
Gm43379	1
E330034L11Rik	1
Gm43457	1
X2900064F13Rik	4
Gm42547	5
Gm43597	5
Gm43980	5
Gm44227	3
Gm44190	5
Gm35339	1
Prmt1	3
Gm48508	3
Gm6627	3
Gm47572	1
Gm47088	1
Gm46430	1
Gm40841	1
Gm47982	5
Gm47551	1
Gm49284	1
Gm50010	1
Apbb3	3
AC156546.1	1
Scmh1	1
Ngfr	2
Drp2	1
Gmpr	3
Arvcf	3
Rtca	3
Ddx3x	1
Usp32	1
Fmr1	1
Gm38393	1
Chtop	2
Snapin	3
N4bp3	3
Mfsd10	3
Rrp15	3
Tcf25	3
Nom1	3
Chordc1	1
Siae	4
Emd	5
Kmt2a	1
Trappc6a	3
Celf2	5
Smg9	3
Rmnd5a	1
Peg3	1
Tmem161a	3
Dyrk1b	3
Atg4d	3
Hdgfl2	3
Nab1	1
Pnkp	3
Med25	3
Cdkn1b	1
Atp5d	3
Ppp5c	3
Cdk12	1
Yju2	3
Ranbp2	1
Car11	3
Ddx23	5
Rabac1	3
Prkcsh	3
Paf1	3
Bicd1	1
Impdh1	3
Ess2	3
Dgcr6	3
Fosb	5
Kpna6	1
Ppfia3	3
Lin7b	3
Ppan	3
Kifc2	3
Utp20	5
X9330159F19Rik	1
Slbp	3
Apba3	3
Matk	3
Dtx2	3
Syt5	2
Ubqln1	1
Fbxo11	1
Ndufs3	3
Psmd4	3
Ampd3	4
Bcas2	3
Tfap4	3
Psmb4	2
Apc	1
Ncoa2	1
Osgep	2
Cdc20	3
P4htm	3
B4galnt1	3
Cnp	3
Abhd16a	3
Tinf2	3
Homer1	1
Ccdc124	3
Zmiz1	1
Fzd3	1
Mid1ip1	2
Ap2s1	3
Fhl2	2
Arpc5	2
Nfib	1
Vps72	3
Cabp7	3
Ewsr1	3
Ube2g2	3
Tnpo1	1
Myod1	3
Mrtfb	1
Cbx5	1
Dmap1	3
Bcr	1
Slc3a2	3
Prox1	1
Tmem86a	3
Myt1	1
Pgam1	3
Zfp715	1
Atp6v0d1	3
Nelfb	3
Ndufs2	2
Sh3bp5l	3
Anapc1	1
Tsg101	3
Ankrd52	1
Wdfy2	5
Nol3	3
Tsr3	2
Mtmr1	1
Map2	1
Sash1	1
Atf6b	3
Qdpr	3
Tnr	1
Sqstm1	2
Macroh2a1	1
Lonrf3	4
Ppdpf	3
Eef1a2	1
Taok1	1
Top2b	1
Igfbp4	2
Zfp334	1
Crk	1
Rrp7a	3
Ints2	1
Med13l	1
Baiap2l2	3
Mafk	3
Uchl5	3
Ro60	1
Mtmr4	1
X6330403K07Rik	3
Adora2b	2
Ncor1	1
Sp2	3
Pank3	1
Pelp1	3
Dalrd3	3
Map1s	3
Fkbp8	3
Gipc1	3
Cdc37	3
Rab4a	3
Slc6a8	1
Ubxn6	3
Ccdc12	3
Lyst	1
Stxbp5	1
Mtres1	3
Aig1	3
Rev3l	1
Tnfaip3	5
Arfgef3	1
Pkib	3
Hsf2	1
Sirt1	1
Fam241b	3
Eif4ebp2	1
Slc16a7	1
Rab21	1
Thap2	1
Frs2	1
Sf3a2	3
Vps13d	1
D10Wsu102e	4
Wdr82	1
Cfap410	3
Xpo1	1
Nsg2	3
Cpeb4	1
Tpgs1	3
Rufy1	3
Cdkn2aipnl	2
Cfap36	2
Pold2	3
Dbnl	3
Ccdc117	1
Dynll2	1
Prpsap2	2
Tspan13	2
Rock2	1
Pum2	1
Gna13	1
Itsn2	1
Ncoa1	1
Pxdn	1
Nf1	1
Helz	1
Slc9a3r1	2
Pafah1b1	1
Recql5	5
Itgb4	3
Galk1	3
Mrpl38	3
Klhl28	1
Strn3	1
Ralgapa1	1
Nin	5
Vti1b	3
Arg2	3
Trip11	5
Lgmn	3
Chga	3
Ppp4r4	1
Ylpm1	1
Fos	1
Yy1	1
Tecpr2	4
Zfyve21	3
Mtr	1
Prl	1
Nup153	1
Txndc15	3
B4galt7	3
Zfp369	1
Cetn3	2
Smad5	1
Col4a3bp	1
Iqgap2	1
Pde8b	1
Zfyve16	5
Kctd6	1
Plpp1	3
Kat6b	5
Ube2e1	2
Oxsm	4
Rtraf	2
Dnajc9	3
Anxa7	3
Mapk1ip1l	1
Ogdhl	1
Mapk8	1
Dcp1a	5
Micu2	4
Slc25a30	1
Nufip1	3
Stmn4	3
Itm2b	3
Uchl3	2
Rbm26	5
Nup155	4
Psmb5	3
Golph3	4
Emc9	3
Trio	1
Baalc	5
Zfpm2	1
Rad21	1
Dnal4	3
Sh3bp1	3
Samm50	3
Adamts20	1
Pde1b	3
Ppp1r1a	2
Sharpin	3
Ly6h	3
Dubr	5
Trmt2a	3
Senp5	1
Fgd4	1
Osbpl11	1
Usp25	1
Mrpl39	3
Dyrk1a	1
Pigp	3
Cfap298	3
Faim2	3
Denr	3
Bsg	3
Ache	3
Pcbp4	3
Chd1	1
Pde10a	1
Phf10	1
Flywch2	3
Cnpy3	3
Foxp4	3
Lpin2	1
Lbh	3
Vapa	1
Dnase1l2	4
Luc7l	1
Taf11	3
Rock1	1
Mib1	1
Zfp871	1
Bin1	3
Map3k2	1
Rbm27	1
Spire1	1
Setbp1	1
Mapk4	1
Sall3	4
Gm16286	3
Txnl1	3
Nedd4l	1
Camk2a	1
Cndp2	3
Incenp	3
Osbp	1
Zfp91	1
Atl3	4
Rcl1	3
Snx15	3
Zfpl1	3
Vps51	3
Tm7sf2	3
Tnks2	1
Rps6kb2	3
Klc2	3
Rab1b	3
Papss2	1
Drap1	3
Rcor2	3
Tcf7l2	1
Plce1	1
Noc3l	1
Lcor	1
Smndc1	2
Pcgf6	5
Slk	1
Myadml2	2
Pi4k2a	5
Entpd7	5
Oga	1
Mfsd13a	3
Arih1	1
Huwe1	1
Fam120c	1
Jph3	3
Ube3a	1
Kdm5c	1
Atp5b	2
Dctn2	3
Agap2	1
Clns1a	2
Ric8a	3
Cbx8	2
Mkln1	1
Usp16	2
Arhgef9	1
Cnksr2	1
Pgm1	3
Hgs	3
Creb1	1
Ikzf2	1
Lancl1	2
Raph1	5
Trak2	1
Cflar	4
Npas2	5
Zfp142	1
Agfg1	1
Pnkd	3
Trip12	1
Itm2c	3
Nppc	3
Ndufa10	3
Stk25	3
Relch	1
Htr4	5
Pam	1
Lypd1	1
Cdc73	1
Ptpn4	1
Xpr1	1
Glul	1
Cdc42bpa	1
Ahctf1	1
Acbd3	1
Desi2	1
Pycr2	3
Mpc2	3
Dcaf6	1
Abl2	1
Atf6	1
Uhmk1	1
Dnajc1	1
Abi2	1
Eng	3
Nr4a2	1
Acvr1c	1
Tor1a	2
Sec16a	1
Nckap1	1
Emc4	3
Dnajc24	3
Elp4	2
Trim44	1
Zfp106	1
Chac1	2
Spred1	1
Snrpb	2
Rbck1	3
Kif3b	1
Zdbf2	5
Arfgap1	3
Nfs1	3
Tbl1xr1	1
Rprd1b	1
Ralgapb	1
Skil	1
Pik3ca	1
Pex5l	1
Ttc14	5
Ncoa3	1
Dhx36	1
Kpna4	1
Dclk1	1
Nbea	1
Tsc22d2	1
Gstm4	2
Ahcyl1	1
Slc35a3	1
Trim2	1
Ash1l	1
Lmna	3
Naxe	3
Lrrc7	1
Mmp16	1
Ubxn2b	1
Xpa	3
Coro2a	5
Erp44	3
Pappa	1
Ptbp3	1
Alad	3
B4galt1	1
Dctn3	3
Ccdc107	3
Sgip1	1
Nfia	1
Pum1	1
Lrp8	5
Tceanc2	1
Lypla2	3
Hpca	3
Syf2	3
Ncdn	3
Ago3	1
Trappc3	3
Nudc	3
Pex14	3
Fbxo44	3
Mthfr	5
Pex10	3
Rer1	3
Htt	1
Stx18	3
Rab28	2
Dnajb6	3
Fosl2	1
Slc4a1ap	3
Eif2b4	3
Pds5a	1
Clock	1
Hnrnpdl	3
Tpst2	3
Arl6ip4	3
Rimbp2	5
Rhof	3
Anapc7	3
Camkk2	3
Snx8	2
Actb	1
Zfp12	1
Ddx54	3
Pan3	1
Actl6b	2
Tsc22d4	3
Klhdc10	1
Tra2a	1
Ccdc184	3
Gfpt1	1
Dusp11	1
Zfp638	1
Prickle2	1
Kbtbd8	1
Pole4	3
Aplf	2
Edem1	1
Gabarapl1	3
Atf7ip	1
Wbp11	3
Srgap3	1
Kras	1
Etnk1	5
Tmtc1	1
Tamm41	3
U2af2	3
Psd3	1
Asb7	1
Mef2a	1
Nfkbib	3
Me3	3
Smg1	1
Nucb2	3
Pde3b	5
Cdipt	3
Nfatc2ip	1
Fus	3
Lamtor1	3
Ubfd1	1
Usp9x	5
Syp	3
Pim2	3
Rps6ka3	1
Chic1	1
Rbbp7	3
Tceal6	2
Gins4	3
Tm2d2	3
Klhl2	1
Sorbs2	1
Smarca5	1
Cfap20	3
Mvb12a	3
Babam1	3
X6430548M08Rik	5
Pik3r2	3
Rab3a	3
Lsm4	3
Pbx4	3
Vps4a	3
Vstm5	3
Tmem170	1
Bcar1	3
Sprtn	5
Sesn3	1
Usp2	3
Fem1b	1
Csnk1g1	5
Xrn1	1
Tfdp2	4
Rwdd2a	3
Mras	1
Mon1a	3
Ip6k1	1
Prkar2a	1
Amt	1
Srek1	1
Crebl2	1
Fam189b	3
Ccdc88a	1
Cdv3	5
Slc10a3	3
Ank2	1
Ppp1r9a	1
Pebp1	3
Mycbp2	1
Asic4	3
Ogfod1	5
Trim33	1
Afap1l1	3
Gga1	3
Arid2	1
Hsf4	3
Trappc8	1
Clasp2	1
Larp4b	1
Pcgf3	1
Cep350	1
Fcsk	3
Lrrc24	3
Vav3	1
Lrrc14	3
Egr3	1
St18	1
Exoc6b	1
Ephx4	3
Tmem87a	1
Parl	3
Mga	1
Jcad	1
Zbtb41	1
Pds5b	1
Mks1	3
Sik3	1
Ogt	5
Rhbdd3	3
Exosc4	3
Dnajc17	3
Med13	1
Cbl	1
Diaph2	1
Ice1	5
Hdx	1
Zfyve9	1
Tent4a	1
Ppp1r18	3
Pik3ip1	3
Rxylt1	2
Zyg11b	1
Tiparp	1
Cnot6l	1
Mrps10	3
Sirt6	4
Dusp5	5
Celf5	1
Larp6	3
Acot11	1
Sncb	3
Dop1a	1
Foxn2	1
Mtmr9	1
Arhgap5	1
Eif2s3x	1
Ap2b1	1
Tanc1	1
Sppl2b	3
Ccdc106	3
Scai	1
Plekhj1	3
Vps13c	1
Nat14	3
G2e3	5
Gnptab	1
Midn	5
Rsf1	1
Rnf38	5
R3hdm4	3
Plppr3	3
Lysmd3	1
Ids	1
Dock4	5
Tmem59l	3
Fnip1	1
Mettl25	3
Tmem63b	3
Fmnl2	1
Slain2	1
Arl5a	1
Dgkb	1
Lrrk2	1
X9530068E07Rik	3
Hif1an	4
Tbc1d24	1
Btg1	1
Rnf39	2
Cnot1	1
Eepd1	3
Mag	3
Ago2	1
Cysrt1	2
Cuedc2	3
Fam135b	1
Amdhd2	3
Zfp280c	1
Lrfn3	3
Bcorl1	5
Otud4	1
Zfp113	1
Smpd1	3
Slc35b2	3
Setd7	1
Dennd11	1
Atg101	3
Fam193a	1
Hook3	1
Mxd4	5
Lsm1	2
Taf2	1
Kdm6a	1
Dmxl1	1
Ubr5	1
Ppfia1	1
Bcdin3d	3
Shank2	1
Mcrs1	3
Zfp60	1
Prkci	1
Phc3	1
Cd81	3
Smim14	2
Nufip2	1
Egr2	1
Jmjd1c	5
Ninj1	3
Wipf2	1
Igsf8	3
Mrm3	3
Kmt2c	1
Ormdl3	2
Ttc39b	1
Fam126b	1
Prkab2	1
Glra3	1
Nos1ap	5
Socs7	1
Zfp280d	1
Ubn2	5
Cep85l	1
Dock10	1
Mcl1	1
Josd2	3
Nup205	5
Lefty1	3
Zcchc2	1
Shfl	3
Sccpdh	3
Supt3	3
Ube3c	1
Adrm1	3
Psmd7	2
Shd	3
X1110008P14Rik	3
Abhd2	1
Fn3krp	1
Picalm	1
Alg1	3
Ubn1	1
Ubald1	2
Myo9a	1
Mrpl12	3
Plekhg5	3
Wdr34	2
Cpeb2	1
Zfp597	1
Epg5	4
Zfp800	1
Pcif1	2
Rere	1
Heca	1
Cited2	1
Hip1	1
Ankrd13c	1
Magi2	1
Lats1	1
Elavl1	1
Baz2a	1
Gramd1b	1
Gas8	3
Prrc2c	1
Hey1	2
Fam102b	5
Dtx3	3
Cdh18	5
Usp45	1
Arglu1	1
Os9	3
Dxo	3
Tsfm	3
Zfp609	1
Plppr2	3
Btaf1	1
Erc2	1
Tasor	1
Oaz2	3
Phc1	1
Eif4h	3
Rnf167	3
Iqsec3	1
Tex264	3
Sft2d2	1
Psme4	5
Reps2	1
Ino80d	1
Rfx3	1
Fam117b	1
Wwp1	1
Hectd2	5
Rpusd1	3
Zfp236	1
Nkx6.2	3
Rap1gap	3
Ccdc9	3
Pik3r1	1
Arhgap32	1
Gpr12	3
Irf8	3
Ago1	1
Nop53	2
Camsap2	1
Cdc42ep4	2
Slc39a11	3
Rims1	1
Fcho2	4
Amot	4
Btbd7	1
Ubac2	3
Haus1	3
Rapgef5	1
Dstyk	1
Cox10	3
Gm9774	3
Tent2	1
Zfp451	1
Kdm5b	1
Bag2	3
Grk3	5
Specc1	1
Snx18	1
Gatad2b	1
Zmym6	1
Ago4	1
Mier2	3
Sh2b3	4
Kdm7a	1
Hirip3	3
Alkbh5	1
Rgs8	1
Sipa1l1	1
Atpaf2	3
Trafd1	3
Bmt2	1
Bex2	2
Smg7	1
Borcs5	3
Pyurf	3
Upf2	1
Tmem64	1
Rnf227	3
Zmym1	1
Trp53bp1	1
Rell2	3
Tceal3	2
Rnf208	3
Csrnp3	1
Setd2	1
Tubg2	3
Ccdc73	1
Cirbp	3
Lrrc3b	3
Zfp688	3
Klhdc9	3
Dcaf12l1	3
Trim39	1
Trrap	1
Pcdhb3	1
Tssc4	3
B230219D22Rik	1
Cradd	3
Adra1a	1
Mosmo	1
X9930021J03Rik	1
Vps13a	1
Bex3	3
Ppm1e	1
Nexmif	1
Bdh1	3
Ttc34	3
Hmga1	3
Fbl	2
Mars2	1
Zfp445	1
Ngrn	2
Cltc	1
Zfp654	1
Samd14	3
Dusp18	1
Neurl4	1
X8030462N17Rik	1
[truncated: 2,565 more rows]

## Sheet: 6d-MlvDi,vEst ∆DE Clust Enrichr
Term	db	(Estrous-Stage vs Male) KO vs WT DE Pattern Set	n cluster genes in term	,	P.adj	OR	P	Enrichr Score	Genes
Up-regulated Genes In Cerebellum Of 6 Mon HD Q140 Mice Vs Q20 GSE78270	HDSigDB 2021	DiestVMaleAccent1 (Diestrus vs Male, female high/KO upreg, male low/KO downreg)	277	1438	1.58637e-79	5.136	6.85849e-83	971.675	ITSN2;CYFIP2;CYFIP1;NCKAP1;IPO11;PANK3;ZFYVE9;TRRAP;FRMPD4;KANTR;ALKBH8;PREX2;RPS6KA3;DPYSL5;ZMIZ1;PPP4R4;SOX6;CALN1;AGFG1;SOX5;MEF2A;UNC13C;PRKAB2;MEF2C;PRKCI;MRTFB;ANK2;ANK3;HPCAL4;THAP2;UHMK1;XRN1;TCEANC2;ATF7;HECA;KCTD12;ZFPM2;ATF6;CLOCK;NECAB1;MTMR9;NEDD4L;BAZ2A;TMTC1;NYAP2;GIGYF2;MED12L;TTBK2;LARP1;MAP2;PRKAR2A;RAD21;DHX36;RAB11FIP4;SCAI;CREBBP;DTNA;TIPARP;PRRC2C;GNG12;PBX1;ST18;PUM2;CCDC88…
Up-regulated Genes In Cerebellum Of 6 Mon HD Q140 Mice Vs Q20 GSE78270	HDSigDB 2021	Union of DiestVMaleAccent3 and EstVMaleAccent3 (female low/KO downreg, male high/KO upreg)	277	1438	1.58637e-79	5.136	6.85849e-83	971.675	ITSN2;CYFIP2;CYFIP1;NCKAP1;IPO11;PANK3;ZFYVE9;TRRAP;FRMPD4;KANTR;ALKBH8;PREX2;RPS6KA3;DPYSL5;ZMIZ1;PPP4R4;SOX6;CALN1;AGFG1;SOX5;MEF2A;UNC13C;PRKAB2;MEF2C;PRKCI;MRTFB;ANK2;ANK3;HPCAL4;THAP2;UHMK1;XRN1;TCEANC2;ATF7;HECA;KCTD12;ZFPM2;ATF6;CLOCK;NECAB1;MTMR9;NEDD4L;BAZ2A;TMTC1;NYAP2;GIGYF2;MED12L;TTBK2;LARP1;MAP2;PRKAR2A;RAD21;DHX36;RAB11FIP4;SCAI;CREBBP;DTNA;TIPARP;PRRC2C;GNG12;PBX1;ST18;PUM2;CCDC88…
Genes Down-Regulated In Sst/Npy-expressing Interneurons Of HD Patients Vs Control PMID32681824	HDSigDB 2021	DiestVMaleAccent1 (Diestrus vs Male, female high/KO upreg, male low/KO downreg)	531	4689	1.88221e-73	3.30265	1.62751e-76	576.343	ITSN2;CYFIP2;CYFIP1;NCKAP1;IPO11;CHIC1;TRIO;ZFYVE9;TRRAP;FRMPD4;NEXMIF;WIPF2;ABAT;ALKBH8;DCAF6;PREX2;RNF114;DPYSL5;PPP4R4;GPBP1;CDK5RAP1;MEF2A;PRKAB2;MEF2C;PRKCI;RFX3;FRS2;PHKA1;HPCAL4;RC3H2;ATG12;MOSMO;RUFY3;ATF6;CLOCK;MTMR1;CEP85L;MTMR9;NEDD4L;BAZ2A;MTMR4;NYAP2;GIGYF2;EPB41L5;LARP1;RAD21;MCMBP;CREBBP;FZD3;PHC1;HOMER1;NEBL;HOMER2;EDEM1;EXOC6B;BBIP1;PHC3;TMEM196;PRDX6;PBX1;POU6F1;AGO3;AGO4;AGO1;A…
Genes Down-Regulated In Sst/Npy-expressing Interneurons Of HD Patients Vs Control PMID32681824	HDSigDB 2021	Union of DiestVMaleAccent3 and EstVMaleAccent3 (female low/KO downreg, male high/KO upreg)	531	4689	1.88221e-73	3.30265	1.62751e-76	576.343	ITSN2;CYFIP2;CYFIP1;NCKAP1;IPO11;CHIC1;TRIO;ZFYVE9;TRRAP;FRMPD4;NEXMIF;WIPF2;ABAT;ALKBH8;DCAF6;PREX2;RNF114;DPYSL5;PPP4R4;GPBP1;CDK5RAP1;MEF2A;PRKAB2;MEF2C;PRKCI;RFX3;FRS2;PHKA1;HPCAL4;RC3H2;ATG12;MOSMO;RUFY3;ATF6;CLOCK;MTMR1;CEP85L;MTMR9;NEDD4L;BAZ2A;MTMR4;NYAP2;GIGYF2;EPB41L5;LARP1;RAD21;MCMBP;CREBBP;FZD3;PHC1;HOMER1;NEBL;HOMER2;EDEM1;EXOC6B;BBIP1;PHC3;TMEM196;PRDX6;PBX1;POU6F1;AGO3;AGO4;AGO1;A…
Genes Down-Regulated In Striatal Cholinergic Interneurons Of HdhQ170 Vs HdhQ20 PMID32681824	HDSigDB 2021	DiestVMaleAccent1 (Diestrus vs Male, female high/KO upreg, male low/KO downreg)	217	986	7.60597e-72	5.78734	9.86507e-75	986.191	ITSN2;CHIC1;TRIO;PANK3;ZMIZ1;SOX6;MEF2A;UNC13C;MRTFB;RFX3;ANK2;ANK3;RC3H2;UHMK1;BCR;SNHG14;MARF1;XRN1;SIK3;ATF7;ATF6;CLOCK;NECAB1;CEP85L;MYCBP2;NEDD4L;PIK3R1;IQGAP2;SCAI;CREBBP;EGR2;EGR3;HOMER1;PRRC2C;PUM1;PHC3;PBX1;DCLK1;MED13L;FOSL2;PUM2;CCDC88A;FAM135B;AGO3;AGO1;AGO2;CPEB4;PHF3;SETD2;SMG1;AHCTF1;CSRNP3;HIP1;SETD7;RSF1;SMG7;LYST;NIPBL;MED13;SIPA1L1;DENND11;REV3L;SPTAN1;TEAD1;UPF2;NCOA1;NCOA2;CN…
Genes Down-Regulated In Striatal Cholinergic Interneurons Of HdhQ170 Vs HdhQ20 PMID32681824	HDSigDB 2021	Union of DiestVMaleAccent3 and EstVMaleAccent3 (female low/KO downreg, male high/KO upreg)	217	986	7.60597e-72	5.78734	9.86507e-75	986.191	ITSN2;CHIC1;TRIO;PANK3;ZMIZ1;SOX6;MEF2A;UNC13C;MRTFB;RFX3;ANK2;ANK3;RC3H2;UHMK1;BCR;SNHG14;MARF1;XRN1;SIK3;ATF7;ATF6;CLOCK;NECAB1;CEP85L;MYCBP2;NEDD4L;PIK3R1;IQGAP2;SCAI;CREBBP;EGR2;EGR3;HOMER1;PRRC2C;PUM1;PHC3;PBX1;DCLK1;MED13L;FOSL2;PUM2;CCDC88A;FAM135B;AGO3;AGO1;AGO2;CPEB4;PHF3;SETD2;SMG1;AHCTF1;CSRNP3;HIP1;SETD7;RSF1;SMG7;LYST;NIPBL;MED13;SIPA1L1;DENND11;REV3L;SPTAN1;TEAD1;UPF2;NCOA1;NCOA2;CN…
Genes Down-Regulated In Striatal Cholinergic Interneurons Of HdhQ111 Vs HdhQ20 PMID32681824	HDSigDB 2021	DiestVMaleAccent1 (Diestrus vs Male, female high/KO upreg, male low/KO downreg)	226	1125	3.07195e-67	5.17146	5.3125e-70	824.904	ITSN2;TRIO;PANK3;RPS6KA3;ZMIZ1;PLCE1;SOX6;PKNOX2;MEF2A;UNC13C;MRTFB;RFX3;ANK2;ANK3;HPCAL4;RC3H2;BCR;SNHG14;MARF1;XRN1;XRN2;SIK3;ATF7;ATF6;CLOCK;NECAB1;CEP85L;MYCBP2;AGAP2;NEDD4L;PIK3R1;TTBK2;SCAI;CREBBP;EGR3;HOMER1;PRRC2C;PUM1;PHC3;PBX1;DCLK1;ST18;MED13L;PUM2;CCDC88A;FAM135B;AGO3;AGO2;CPEB2;CPEB4;PHF3;SMG1;SETD2;AHCTF1;CLTC;RSF1;ARHGAP5;SMG7;LYST;NIPBL;MED13;SIPA1L1;REV3L;IDS;SPTAN1;TEAD1;NCOA1;Z…
Genes Down-Regulated In Striatal Cholinergic Interneurons Of HdhQ111 Vs HdhQ20 PMID32681824	HDSigDB 2021	Union of DiestVMaleAccent3 and EstVMaleAccent3 (female low/KO downreg, male high/KO upreg)	226	1125	3.07195e-67	5.17146	5.3125e-70	824.904	ITSN2;TRIO;PANK3;RPS6KA3;ZMIZ1;PLCE1;SOX6;PKNOX2;MEF2A;UNC13C;MRTFB;RFX3;ANK2;ANK3;HPCAL4;RC3H2;BCR;SNHG14;MARF1;XRN1;XRN2;SIK3;ATF7;ATF6;CLOCK;NECAB1;CEP85L;MYCBP2;AGAP2;NEDD4L;PIK3R1;TTBK2;SCAI;CREBBP;EGR3;HOMER1;PRRC2C;PUM1;PHC3;PBX1;DCLK1;ST18;MED13L;PUM2;CCDC88A;FAM135B;AGO3;AGO2;CPEB2;CPEB4;PHF3;SMG1;SETD2;AHCTF1;CLTC;RSF1;ARHGAP5;SMG7;LYST;NIPBL;MED13;SIPA1L1;REV3L;IDS;SPTAN1;TEAD1;NCOA1;Z…
Up-regulated Genes In Hippocampus Of 6 Mon HD Q175 Mice Vs Q20 GSE73503	HDSigDB 2021	DiestVMaleAccent1 (Diestrus vs Male, female high/KO upreg, male low/KO downreg)	341	2361	1.64671e-66	3.74918	3.55967e-69	590.903	CHIC1;GMFB;PANK3;PLEKHB2;FRMPD4;NEXMIF;IPP;CCNC;MSANTD4;IKZF2;ALKBH8;PREX2;RPS6KA3;SCP2;GPBP1;DPYSL3;CHORDC1;PLCE1;LUC7L;SOX6;AGFG1;SOX5;MEF2A;UNC13C;MEF2C;PRKCI;RFX3;ANK2;ANK3;RC3H2;MTURN;UHMK1;MOSMO;AR;XRN1;RUFY3;XRN2;RELCH;KCTD12;CLOCK;MTMR1;NECAB1;STXBP4;PDE1A;MYCBP2;LYPD1;DCUN1D1;SLAIN2;TMTC1;NYAP2;MED12L;TTBK2;MAP2;RAD21;DHX36;STXBP5;RIMKLB;SCAI;SRPK2;FZD3;NEBL;INTS2;PRRC2C;RAB27B;BBIP1;GNG…
Up-regulated Genes In Hippocampus Of 6 Mon HD Q175 Mice Vs Q20 GSE73503	HDSigDB 2021	Union of DiestVMaleAccent3 and EstVMaleAccent3 (female low/KO downreg, male high/KO upreg)	341	2361	1.64671e-66	3.74918	3.55967e-69	590.903	CHIC1;GMFB;PANK3;PLEKHB2;FRMPD4;NEXMIF;IPP;CCNC;MSANTD4;IKZF2;ALKBH8;PREX2;RPS6KA3;SCP2;GPBP1;DPYSL3;CHORDC1;PLCE1;LUC7L;SOX6;AGFG1;SOX5;MEF2A;UNC13C;MEF2C;PRKCI;RFX3;ANK2;ANK3;RC3H2;MTURN;UHMK1;MOSMO;AR;XRN1;RUFY3;XRN2;RELCH;KCTD12;CLOCK;MTMR1;NECAB1;STXBP4;PDE1A;MYCBP2;LYPD1;DCUN1D1;SLAIN2;TMTC1;NYAP2;MED12L;TTBK2;MAP2;RAD21;DHX36;STXBP5;RIMKLB;SCAI;SRPK2;FZD3;NEBL;INTS2;PRRC2C;RAB27B;BBIP1;GNG…
Top Astrocyte-Expressed Genes In Humans And Mice PMID29892006	HDSigDB 2021	DiestVMaleAccent1 (Diestrus vs Male, female high/KO upreg, male low/KO downreg)	206	1000	8.22526e-63	5.24834	2.13366e-65	781.532	CYFIP1;NCKAP1;AHCYL1;PANK3;SPARC;ABAT;ACTB;PREX2;SCP2;PPP2R1A;LUC7L;GLUL;PAQR8;RFX3;PHKA1;ANK2;MMD2;ASRGL1;PPP1R3C;SIK3;ALDH7A1;LXN;SET;SDC4;MAOB;EPAS1;MAGED1;MYCBP2;LARP1;MAP2;MAP4;RIMKLB;ARGLU1;SRPK2;GSTM3;CREBBP;GSTM1;DTNA;NEBL;TIPARP;IRF2BP2;PRRC2C;GNG12;PUM1;PRDX6;PBX1;DCLK1;CCDC88A;AGO3;AGO2;SFXN5;CPEB4;PYGB;TOP2B;SETD2;SMG1;BTG1;CLTC;RSF1;CROT;FMN2;ARHGAP5;SMG7;NIPBL;MED13;NHSL1;XPO1;TRIM2…
Top Astrocyte-Expressed Genes In Humans And Mice PMID29892006	HDSigDB 2021	Union of DiestVMaleAccent3 and EstVMaleAccent3 (female low/KO downreg, male high/KO upreg)	206	1000	8.22526e-63	5.24834	2.13366e-65	781.532	CYFIP1;NCKAP1;AHCYL1;PANK3;SPARC;ABAT;ACTB;PREX2;SCP2;PPP2R1A;LUC7L;GLUL;PAQR8;RFX3;PHKA1;ANK2;MMD2;ASRGL1;PPP1R3C;SIK3;ALDH7A1;LXN;SET;SDC4;MAOB;EPAS1;MAGED1;MYCBP2;LARP1;MAP2;MAP4;RIMKLB;ARGLU1;SRPK2;GSTM3;CREBBP;GSTM1;DTNA;NEBL;TIPARP;IRF2BP2;PRRC2C;GNG12;PUM1;PRDX6;PBX1;DCLK1;CCDC88A;AGO3;AGO2;SFXN5;CPEB4;PYGB;TOP2B;SETD2;SMG1;BTG1;CLTC;RSF1;CROT;FMN2;ARHGAP5;SMG7;NIPBL;MED13;NHSL1;XPO1;TRIM2…
Striatum RNA M30 Module (Steelblue) PMID26900923	HDSigDB 2021	DiestVMaleAccent1 (Diestrus vs Male, female high/KO upreg, male low/KO downreg)	161	642	1.25927e-60	6.55836	3.81102e-63	942.6	ITSN2;TRIO;PANK3;FRMPD4;TRRAP;ABAT;UBE3A;IPO7;ALKBH8;AMOT;PREX2;DOCK10;RIMS1;RPS6KA3;PTAR1;SESN3;ZMIZ1;PLCE1;SLC16A7;TNR;SOX6;MEF2A;RALGAPA1;VPS33A;TMOD2;ANK2;LARP4B;ANK3;THAP2;UHMK1;PYGO1;AR;STX1B;RALGAPB;XRN1;DOK6;TBC1D24;ATF7;CLOCK;XPR1;INO80D;SHC3;MYCBP2;GLIS3;MTMR9;RASAL2;PIK3R1;NYAP2;FOXO3;PDS5A;MED12L;KIF3B;SNTG1;EIF4EBP2;SRGAP3;RAB11FIP4;SCAI;ANKRD26;DTNA;CBX5;PHF10;NEBL;DENND4A;CEP350;SE…
Striatum RNA M30 Module (Steelblue) PMID26900923	HDSigDB 2021	Union of DiestVMaleAccent3 and EstVMaleAccent3 (female low/KO downreg, male high/KO upreg)	161	642	1.25927e-60	6.55836	3.81102e-63	942.6	ITSN2;TRIO;PANK3;FRMPD4;TRRAP;ABAT;UBE3A;IPO7;ALKBH8;AMOT;PREX2;DOCK10;RIMS1;RPS6KA3;PTAR1;SESN3;ZMIZ1;PLCE1;SLC16A7;TNR;SOX6;MEF2A;RALGAPA1;VPS33A;TMOD2;ANK2;LARP4B;ANK3;THAP2;UHMK1;PYGO1;AR;STX1B;RALGAPB;XRN1;DOK6;TBC1D24;ATF7;CLOCK;XPR1;INO80D;SHC3;MYCBP2;GLIS3;MTMR9;RASAL2;PIK3R1;NYAP2;FOXO3;PDS5A;MED12L;KIF3B;SNTG1;EIF4EBP2;SRGAP3;RAB11FIP4;SCAI;ANKRD26;DTNA;CBX5;PHF10;NEBL;DENND4A;CEP350;SE…
Genes Changed In Striatal Cholinergic Interneurons Of HdhQ170 Vs HdhQ20 PMID32681824	HDSigDB 2021	DiestVMaleAccent1 (Diestrus vs Male, female high/KO upreg, male low/KO downreg)	229	1290	5.45608e-58	4.41519	1.8871e-60	607.178	ITSN2;CHIC1;TRIO;PANK3;ZMIZ1;PPP2R1A;SOX6;MEF2A;UNC13C;MRTFB;RFX3;ANK2;ANK3;RC3H2;UHMK1;BCR;SNHG14;MARF1;XRN1;SIK3;ATF7;ATF6;CLOCK;NECAB1;CEP85L;MYCBP2;NEDD4L;PIK3R1;IQGAP2;SCAI;CREBBP;EGR2;EGR3;HOMER1;PRRC2C;BBIP1;PUM1;PHC3;PBX1;DCLK1;MED13L;FOSL2;PUM2;CCDC88A;FAM135B;AGO3;AGO1;AGO2;CPEB4;CDK16;PHF3;SMG1;SETD2;AHCTF1;CSRNP3;HIP1;SETD7;SNX12;RSF1;SMG7;LYST;NIPBL;MED13;SIPA1L1;DENND11;REV3L;SPTAN1…
Genes Changed In Striatal Cholinergic Interneurons Of HdhQ170 Vs HdhQ20 PMID32681824	HDSigDB 2021	Union of DiestVMaleAccent3 and EstVMaleAccent3 (female low/KO downreg, male high/KO upreg)	229	1290	5.45608e-58	4.41519	1.8871e-60	607.178	ITSN2;CHIC1;TRIO;PANK3;ZMIZ1;PPP2R1A;SOX6;MEF2A;UNC13C;MRTFB;RFX3;ANK2;ANK3;RC3H2;UHMK1;BCR;SNHG14;MARF1;XRN1;SIK3;ATF7;ATF6;CLOCK;NECAB1;CEP85L;MYCBP2;NEDD4L;PIK3R1;IQGAP2;SCAI;CREBBP;EGR2;EGR3;HOMER1;PRRC2C;BBIP1;PUM1;PHC3;PBX1;DCLK1;MED13L;FOSL2;PUM2;CCDC88A;FAM135B;AGO3;AGO1;AGO2;CPEB4;CDK16;PHF3;SMG1;SETD2;AHCTF1;CSRNP3;HIP1;SETD7;SNX12;RSF1;SMG7;LYST;NIPBL;MED13;SIPA1L1;DENND11;REV3L;SPTAN1…
Genes Up-Regulated In Endothelial Cells Of HD Patients Vs Control PMID32681824	HDSigDB 2021	DiestVMaleAccent1 (Diestrus vs Male, female high/KO upreg, male low/KO downreg)	262	1723	2.52549e-53	3.72723	9.82681e-56	472.089	ITSN2;NCKAP1;AHCYL1;TRIO;PLEKHB2;ZFYVE9;TRRAP;WIPF2;DCAF6;RPS6KA3;ZMIZ1;GPBP1;CHORDC1;LUC7L;TBC1D22A;AGFG1;SOX5;RFX3;ANK2;ASRGL1;BCR;XRN1;RUFY3;XRN2;SIK3;ATF6;RIN2;CLOCK;MYCBP2;NEDD4L;BAZ2A;PIK3R1;GIGYF2;TTBK2;EPB41L5;LARP1;SRPK2;CREBBP;DTNA;NEBL;PRRC2C;IRF2BP2;PUM1;GNG12;PHC3;PBX1;ST18;MED13L;FOSL2;PUM2;CCDC88A;PEX5L;AGO3;AGO2;CPEB2;CDK14;PAM;CPEB4;PHF3;TOP2B;HBS1L;SMG1;SETD2;AHCTF1;HIP1;PHF20;R…
Genes Up-Regulated In Endothelial Cells Of HD Patients Vs Control PMID32681824	HDSigDB 2021	Union of DiestVMaleAccent3 and EstVMaleAccent3 (female low/KO downreg, male high/KO upreg)	262	1723	2.52549e-53	3.72723	9.82681e-56	472.089	ITSN2;NCKAP1;AHCYL1;TRIO;PLEKHB2;ZFYVE9;TRRAP;WIPF2;DCAF6;RPS6KA3;ZMIZ1;GPBP1;CHORDC1;LUC7L;TBC1D22A;AGFG1;SOX5;RFX3;ANK2;ASRGL1;BCR;XRN1;RUFY3;XRN2;SIK3;ATF6;RIN2;CLOCK;MYCBP2;NEDD4L;BAZ2A;PIK3R1;GIGYF2;TTBK2;EPB41L5;LARP1;SRPK2;CREBBP;DTNA;NEBL;PRRC2C;IRF2BP2;PUM1;GNG12;PHC3;PBX1;ST18;MED13L;FOSL2;PUM2;CCDC88A;PEX5L;AGO3;AGO2;CPEB2;CDK14;PAM;CPEB4;PHF3;TOP2B;HBS1L;SMG1;SETD2;AHCTF1;HIP1;PHF20;R…
Differentially Expressed Genes In Hippocampus Of 6 Mon HD Q175 Mice Vs Q20 GSE73503	HDSigDB 2021	DiestVMaleAccent1 (Diestrus vs Male, female high/KO upreg, male low/KO downreg)	493	4776	5.18634e-53	2.76709	2.24226e-55	348.196	CYFIP2;CHIC1;GMFB;FRMPD4;NEXMIF;IPP;MSANTD4;ALKBH8;PREX2;ALKBH5;SYNGAP1;SCP2;ZMIZ1;GPBP1;DPYSL3;PLCE1;LUC7L;MEF2A;MED1;UNC13C;MEF2C;PRKCI;MRTFB;RFX3;RC3H2;MOSMO;AR;RUFY3;ATF6;CLOCK;MTMR1;LXN;LYPD1;AGAP2;BAZ2A;SLAIN2;NYAP2;IQGAP2;RAD21;GSTM3;CREBBP;FZD3;GSTM1;PHC1;NEBL;EXOC6B;PRRC2C;IRF2BP2;BBIP1;PHC3;TMEM196;PRDX6;POU6F1;FAM135B;EHD3;SLC6A8;AGO3;AGO4;NMT1;FXYD6;CPEB2;SFXN5;EZH1;GSTM5;CPEB4;CDK16;…
Differentially Expressed Genes In Hippocampus Of 6 Mon HD Q175 Mice Vs Q20 GSE73503	HDSigDB 2021	Union of DiestVMaleAccent3 and EstVMaleAccent3 (female low/KO downreg, male high/KO upreg)	493	4776	5.18634e-53	2.76709	2.24226e-55	348.196	CYFIP2;CHIC1;GMFB;FRMPD4;NEXMIF;IPP;MSANTD4;ALKBH8;PREX2;ALKBH5;SYNGAP1;SCP2;ZMIZ1;GPBP1;DPYSL3;PLCE1;LUC7L;MEF2A;MED1;UNC13C;MEF2C;PRKCI;MRTFB;RFX3;RC3H2;MOSMO;AR;RUFY3;ATF6;CLOCK;MTMR1;LXN;LYPD1;AGAP2;BAZ2A;SLAIN2;NYAP2;IQGAP2;RAD21;GSTM3;CREBBP;FZD3;GSTM1;PHC1;NEBL;EXOC6B;PRRC2C;IRF2BP2;BBIP1;PHC3;TMEM196;PRDX6;POU6F1;FAM135B;EHD3;SLC6A8;AGO3;AGO4;NMT1;FXYD6;CPEB2;SFXN5;EZH1;GSTM5;CPEB4;CDK16;…
Cortex RNA M34 Module (Darkmagenta) PMID26900923	HDSigDB 2021	DiestVMaleAccent1 (Diestrus vs Male, female high/KO upreg, male low/KO downreg)	195	1036	9.09552e-53	4.62147	4.32558e-55	578.505	ITSN2;CYFIP2;CYFIP1;FRMPD4;TRRAP;ALKBH8;RPS6KA3;DPYSL3;SOX6;CALN1;SOX5;MEF2A;FRS2;ANK2;ANK3;MTURN;UHMK1;AR;STX1B;XRN1;ATF7;CLOCK;MYCBP2;MTMR9;TMTC1;IQGAP2;NYAP2;GIGYF2;MED12L;TTBK2;STXBP5;RAB11FIP4;CREBBP;FZD3;NEBL;EXOC6B;PRRC2C;HSPA12A;PUM1;PHC3;MED13L;FAM135B;PEX5L;NMT1;CDK14;CPEB4;SETD2;CSRNP3;HIP1;ARHGAP5;LYST;DSTYK;NCOA1;NCOA2;ASH1L;PROX1;RBSN;ZHX1;CNKSR2;ARHGEF9;NCOR1;GAN;EXOC4;FAM193A;RAPG…
Cortex RNA M34 Module (Darkmagenta) PMID26900923	HDSigDB 2021	Union of DiestVMaleAccent3 and EstVMaleAccent3 (female low/KO downreg, male high/KO upreg)	195	1036	9.09552e-53	4.62147	4.32558e-55	578.505	ITSN2;CYFIP2;CYFIP1;FRMPD4;TRRAP;ALKBH8;RPS6KA3;DPYSL3;SOX6;CALN1;SOX5;MEF2A;FRS2;ANK2;ANK3;MTURN;UHMK1;AR;STX1B;XRN1;ATF7;CLOCK;MYCBP2;MTMR9;TMTC1;IQGAP2;NYAP2;GIGYF2;MED12L;TTBK2;STXBP5;RAB11FIP4;CREBBP;FZD3;NEBL;EXOC6B;PRRC2C;HSPA12A;PUM1;PHC3;MED13L;FAM135B;PEX5L;NMT1;CDK14;CPEB4;SETD2;CSRNP3;HIP1;ARHGAP5;LYST;DSTYK;NCOA1;NCOA2;ASH1L;PROX1;RBSN;ZHX1;CNKSR2;ARHGEF9;NCOR1;GAN;EXOC4;FAM193A;RAPG…
Top Neuron-Expressed Genes In Humans And Mice PMID29892006	HDSigDB 2021	DiestVMaleAccent1 (Diestrus vs Male, female high/KO upreg, male low/KO downreg)	190	1000	5.29915e-52	4.65763	2.89709e-54	574.173	CYFIP2;NCKAP1;RAB3C;GMFB;AHCYL1;PLEKHB2;DGKB;CTNND2;ARAF;UBE3A;ABAT;ACTB;PPP2R1A;GPBP1;CHORDC1;KIF5A;PLS3;GLUL;MEF2A;NSF;MEF2C;EIF1AX;RALGAPA1;LMO3;TMOD2;MRTFB;ANK2;ANK3;TUG1;MTURN;SNHG14;RUFY3;PKP4;SREK1;ATP6V1A;NECAB1;SET;KMT2A;MAGED1;KMT2C;MYCBP2;ANKRD12;SLC1A2;PIK3R1;PDS5B;CAMSAP2;LARP1;FUT9;MAP2;RAD21;UBR5;G3BP2;STXBP5;SRGAP3;MAP4;LRRC4C;RAB6B;ARGLU1;LONRF2;SRPK2;HSPA8;TCAF1;UBE2H;CBX5;CPSF6…
Genes Changed In iSPNs Of HD Patients Vs Control PMID32681824	HDSigDB 2021	DiestVMaleAccent1 (Diestrus vs Male, female high/KO upreg, male low/KO downreg)	431	3912	5.29915e-52	2.84922	2.97834e-54	351.162	ITSN2;CYFIP2;NCKAP1;TRIO;ZFYVE9;TRRAP;FRMPD4;NEXMIF;WIPF2;ABAT;ALKBH8;DCAF6;PREX2;SYNGAP1;RNF114;SCP2;DPYSL5;PPP4R4;GPBP1;CDK5RAP1;PKNOX2;MEF2A;UNC13C;PRKCI;FRS2;HPCAL4;ATG12;BCR;RUFY3;ATF6;CLOCK;MTMR1;NEDD4L;MTMR4;NYAP2;SULT1A1;EPB41L5;CREBBP;FZD3;PHC1;HOMER1;EXOC6B;PRRC2C;IRF2BP2;BBIP1;PHC3;TMEM196;ST18;FAM135B;LAS1L;AGO3;AGO4;AGO2;CDK12;CPEB2;CDK14;PAM;SFXN5;SMG1;SETD2;NRSN1;CLTC;ADK;FMN2;SMG7…
Top Neuron-Expressed Genes In Humans And Mice PMID29892006	HDSigDB 2021	Union of DiestVMaleAccent3 and EstVMaleAccent3 (female low/KO downreg, male high/KO upreg)	190	1000	5.29915e-52	4.65763	2.89709e-54	574.173	CYFIP2;NCKAP1;RAB3C;GMFB;AHCYL1;PLEKHB2;DGKB;CTNND2;ARAF;UBE3A;ABAT;ACTB;PPP2R1A;GPBP1;CHORDC1;KIF5A;PLS3;GLUL;MEF2A;NSF;MEF2C;EIF1AX;RALGAPA1;LMO3;TMOD2;MRTFB;ANK2;ANK3;TUG1;MTURN;SNHG14;RUFY3;PKP4;SREK1;ATP6V1A;NECAB1;SET;KMT2A;MAGED1;KMT2C;MYCBP2;ANKRD12;SLC1A2;PIK3R1;PDS5B;CAMSAP2;LARP1;FUT9;MAP2;RAD21;UBR5;G3BP2;STXBP5;SRGAP3;MAP4;LRRC4C;RAB6B;ARGLU1;LONRF2;SRPK2;HSPA8;TCAF1;UBE2H;CBX5;CPSF6…
Genes Changed In iSPNs Of HD Patients Vs Control PMID32681824	HDSigDB 2021	Union of DiestVMaleAccent3 and EstVMaleAccent3 (female low/KO downreg, male high/KO upreg)	431	3912	5.29915e-52	2.84922	2.97834e-54	351.162	ITSN2;CYFIP2;NCKAP1;TRIO;ZFYVE9;TRRAP;FRMPD4;NEXMIF;WIPF2;ABAT;ALKBH8;DCAF6;PREX2;SYNGAP1;RNF114;SCP2;DPYSL5;PPP4R4;GPBP1;CDK5RAP1;PKNOX2;MEF2A;UNC13C;PRKCI;FRS2;HPCAL4;ATG12;BCR;RUFY3;ATF6;CLOCK;MTMR1;NEDD4L;MTMR4;NYAP2;SULT1A1;EPB41L5;CREBBP;FZD3;PHC1;HOMER1;EXOC6B;PRRC2C;IRF2BP2;BBIP1;PHC3;TMEM196;ST18;FAM135B;LAS1L;AGO3;AGO4;AGO2;CDK12;CPEB2;CDK14;PAM;SFXN5;SMG1;SETD2;NRSN1;CLTC;ADK;FMN2;SMG7…
Genes Down-Regulated In Nicotinamide Treated STHdhQ111 Vs Control GSE129143	HDSigDB 2021	DiestVMaleAccent1 (Diestrus vs Male, female high/KO upreg, male low/KO downreg)	177	880	6.14534e-52	4.95818	3.71962e-54	609.984	ITSN2;OTUD4;CYFIP1;NCKAP1;DGKD;PANK3;UBE3C;TRRAP;UBE3A;ARHGAP35;RPS6KA3;PAIP2B;SLK;KPNA6;PPFIA1;EP300;ARID2;KPNA1;OXSM;MRTFB;AP1B1;FRS2;UHMK1;BCR;TANC1;RALGAPB;XRN1;XRN2;PKP4;CLOCK;ANAPC1;XPR1;ATP6V1A;MTMR1;DNMT1;INO80D;CUL5;ABHD2;CLEC16A;MTMR9;BAZ2A;SLAIN2;PDS5B;RASAL2;MTMR4;PDS5A;TTBK2;ARHGAP12;CAMSAP2;KIF3B;UBR5;EIF4EBP2;ABL2;SOCS7;KLHDC10;SPECC1;ANKRD26;CBX5;CPSF6;DENND4A;EDEM1;CEP350;SEC16A;…
Genes Down-Regulated In Nicotinamide Treated STHdhQ111 Vs Control GSE129143	HDSigDB 2021	Union of DiestVMaleAccent3 and EstVMaleAccent3 (female low/KO downreg, male high/KO upreg)	177	880	6.14534e-52	4.95818	3.71962e-54	609.984	ITSN2;OTUD4;CYFIP1;NCKAP1;DGKD;PANK3;UBE3C;TRRAP;UBE3A;ARHGAP35;RPS6KA3;PAIP2B;SLK;KPNA6;PPFIA1;EP300;ARID2;KPNA1;OXSM;MRTFB;AP1B1;FRS2;UHMK1;BCR;TANC1;RALGAPB;XRN1;XRN2;PKP4;CLOCK;ANAPC1;XPR1;ATP6V1A;MTMR1;DNMT1;INO80D;CUL5;ABHD2;CLEC16A;MTMR9;BAZ2A;SLAIN2;PDS5B;RASAL2;MTMR4;PDS5A;TTBK2;ARHGAP12;CAMSAP2;KIF3B;UBR5;EIF4EBP2;ABL2;SOCS7;KLHDC10;SPECC1;ANKRD26;CBX5;CPSF6;DENND4A;EDEM1;CEP350;SEC16A;…
Genes Down-Regulated In WT Treated With PLX3397 Vs Control GSE136158	HDSigDB 2021	DiestVMaleAccent1 (Diestrus vs Male, female high/KO upreg, male low/KO downreg)	259	1725	9.73417e-52	3.65785	6.31269e-54	448.076	CHIC1;PANK3;SPARC;FRMPD4;NEXMIF;KANTR;IKZF2;ALKBH8;PREX2;SOX6;AGFG1;UNC13C;RFX3;ANK2;ANK3;RC3H2;MTURN;UHMK1;MOSMO;AR;SNHG14;XRN1;PAPPA;RELCH;HECA;KCTD12;CLOCK;NECAB1;CEP85L;MYCBP2;SLAIN2;PIK3R1;NYAP2;MED12L;TTBK2;MAP2;PRKAR2A;STXBP5;SCAI;FZD3;NEBL;HOMER2;INTS2;IQSEC3;PRRC2C;RAB27B;GNG12;PHC3;ACADSB;ST18;PUM2;FAM135B;AGO3;CPEB2;CDK14;CPEB4;SMG1;CSRNP3;PHF20;SETD7;RSF1;ARHGAP5;LYST;WDR44;NIPBL;MED1…
Genes Down-Regulated In WT Treated With PLX3397 Vs Control GSE136158	HDSigDB 2021	Union of DiestVMaleAccent3 and EstVMaleAccent3 (female low/KO downreg, male high/KO upreg)	259	1725	9.73417e-52	3.65785	6.31269e-54	448.076	CHIC1;PANK3;SPARC;FRMPD4;NEXMIF;KANTR;IKZF2;ALKBH8;PREX2;SOX6;AGFG1;UNC13C;RFX3;ANK2;ANK3;RC3H2;MTURN;UHMK1;MOSMO;AR;SNHG14;XRN1;PAPPA;RELCH;HECA;KCTD12;CLOCK;NECAB1;CEP85L;MYCBP2;SLAIN2;PIK3R1;NYAP2;MED12L;TTBK2;MAP2;PRKAR2A;STXBP5;SCAI;FZD3;NEBL;HOMER2;INTS2;IQSEC3;PRRC2C;RAB27B;GNG12;PHC3;ACADSB;ST18;PUM2;FAM135B;AGO3;CPEB2;CDK14;CPEB4;SMG1;CSRNP3;PHF20;SETD7;RSF1;ARHGAP5;LYST;WDR44;NIPBL;MED1…
Genes Changed In Foxp2/Olfm3-expressing Neurons Of HD Patients Vs Control PMID32681824	HDSigDB 2021	DiestVMaleAccent1 (Diestrus vs Male, female high/KO upreg, male low/KO downreg)	416	3731	3.91641e-51	2.85495	2.70915e-53	345.564	ITSN2;CYFIP2;CYFIP1;FRMPD4;NEXMIF;ABAT;ALKBH8;PREX2;SYNGAP1;SCP2;DPYSL5;ZMIZ1;PPP4R4;DPYSL3;PLCE1;PKNOX2;MEF2A;UNC13C;MEF2C;FRS2;HPCAL4;MOSMO;WDR82;RUFY3;MTMR1;CEP85L;AGAP2;NEDD4L;IQGAP2;GIGYF2;EPB41L5;LARP1;PRKAR2A;RAD21;GSTM3;FZD3;PHC1;HOMER1;NEBL;HOMER2;EXOC6B;IRF2BP2;BBIP1;PHC3;TMEM196;PBX1;ST18;FAM135B;AGO4;CDK12;CDK14;SFXN5;EZH1;CPEB4;LRSAM1;BTG1;NRSN1;CLTC;FMN2;ARHGAP5;SMG7;PIP4P2;MED13;TR…
Genes Changed In Foxp2/Olfm3-expressing Neurons Of HD Patients Vs Control PMID32681824	HDSigDB 2021	Union of DiestVMaleAccent3 and EstVMaleAccent3 (female low/KO downreg, male high/KO upreg)	416	3731	3.91641e-51	2.85495	2.70915e-53	345.564	ITSN2;CYFIP2;CYFIP1;FRMPD4;NEXMIF;ABAT;ALKBH8;PREX2;SYNGAP1;SCP2;DPYSL5;ZMIZ1;PPP4R4;DPYSL3;PLCE1;PKNOX2;MEF2A;UNC13C;MEF2C;FRS2;HPCAL4;MOSMO;WDR82;RUFY3;MTMR1;CEP85L;AGAP2;NEDD4L;IQGAP2;GIGYF2;EPB41L5;LARP1;PRKAR2A;RAD21;GSTM3;FZD3;PHC1;HOMER1;NEBL;HOMER2;EXOC6B;IRF2BP2;BBIP1;PHC3;TMEM196;PBX1;ST18;FAM135B;AGO4;CDK12;CDK14;SFXN5;EZH1;CPEB4;LRSAM1;BTG1;NRSN1;CLTC;FMN2;ARHGAP5;SMG7;PIP4P2;MED13;TR…
Genes Changed In Striatal Cholinergic Interneurons Of HdhQ111 Vs HdhQ20 PMID32681824	HDSigDB 2021	DiestVMaleAccent1 (Diestrus vs Male, female high/KO upreg, male low/KO downreg)	246	1617	6.56386e-50	3.67844	4.82428e-52	434.648	ITSN2;TRIO;PANK3;RPS6KA3;ZMIZ1;PLCE1;SOX6;PKNOX2;MEF2A;UNC13C;MRTFB;RFX3;ANK2;ANK3;HPCAL4;RC3H2;BCR;SNHG14;MARF1;XRN1;XRN2;SIK3;ATF7;ATF6;CLOCK;NECAB1;CEP85L;MYCBP2;AGAP2;NEDD4L;PIK3R1;TTBK2;MAP4;SCAI;GSTM3;CREBBP;EGR3;HOMER1;NCAPH2;PRRC2C;PUM1;PHC3;PBX1;DCLK1;ST18;MED13L;PUM2;CCDC88A;FAM135B;AGO3;AGO2;CPEB2;CPEB4;CDK16;PHF3;SMG1;SETD2;AHCTF1;CLTC;SNX12;RSF1;ARHGAP5;SMG7;LYST;NIPBL;PIP4P2;MED13;S…
Genes Changed In Striatal Cholinergic Interneurons Of HdhQ111 Vs HdhQ20 PMID32681824	HDSigDB 2021	Union of DiestVMaleAccent3 and EstVMaleAccent3 (female low/KO downreg, male high/KO upreg)	246	1617	6.56386e-50	3.67844	4.82428e-52	434.648	ITSN2;TRIO;PANK3;RPS6KA3;ZMIZ1;PLCE1;SOX6;PKNOX2;MEF2A;UNC13C;MRTFB;RFX3;ANK2;ANK3;HPCAL4;RC3H2;BCR;SNHG14;MARF1;XRN1;XRN2;SIK3;ATF7;ATF6;CLOCK;NECAB1;CEP85L;MYCBP2;AGAP2;NEDD4L;PIK3R1;TTBK2;MAP4;SCAI;GSTM3;CREBBP;EGR3;HOMER1;NCAPH2;PRRC2C;PUM1;PHC3;PBX1;DCLK1;ST18;MED13L;PUM2;CCDC88A;FAM135B;AGO3;AGO2;CPEB2;CPEB4;CDK16;PHF3;SMG1;SETD2;AHCTF1;CLTC;SNX12;RSF1;ARHGAP5;SMG7;LYST;NIPBL;PIP4P2;MED13;S…
Genes Up-Regulated In Myotonic Dystrophy 2 Markers In Human Skeletal Muscle E-D-7014	HDSigDB 2021	DiestVMaleAccent1 (Diestrus vs Male, female high/KO upreg, male low/KO downreg)	338	2795	3.42499e-47	2.96443	2.66536e-49	331.561	CYFIP2;CHIC1;TRIO;SPARC;TRRAP;IPP;IKZF2;DCAF6;RPS6KA3;SCP2;GPBP1;DPYSL3;CDK5RAP1;SOX6;MEF2A;MED1;PRKAB2;MEF2C;OXSM;MRTFB;PHKA1;ANK2;ANK3;RC3H2;MTURN;AR;MARF1;PPP1R3C;XRN1;RUFY3;RELCH;KCTD12;ZFPM2;ATF6;ALDH7A1;CLOCK;MAOB;MAGED1;CEP85L;MYCBP2;DCUN1D1;MTMR9;NEDD4L;SLAIN2;GIGYF2;TTBK2;EPB41L5;PRKAR2A;DHX36;MAP4;RIMKLB;ARGLU1;SCAI;DTNA;HOMER1;INTS2;EXOC6B;PRRC2C;BBIP1;PHC3;ACADSB;PBX1;MED13L;PUM2;CCDC…
Genes Up-Regulated In Myotonic Dystrophy 2 Markers In Human Skeletal Muscle E-D-7014	HDSigDB 2021	Union of DiestVMaleAccent3 and EstVMaleAccent3 (female low/KO downreg, male high/KO upreg)	338	2795	3.42499e-47	2.96443	2.66536e-49	331.561	CYFIP2;CHIC1;TRIO;SPARC;TRRAP;IPP;IKZF2;DCAF6;RPS6KA3;SCP2;GPBP1;DPYSL3;CDK5RAP1;SOX6;MEF2A;MED1;PRKAB2;MEF2C;OXSM;MRTFB;PHKA1;ANK2;ANK3;RC3H2;MTURN;AR;MARF1;PPP1R3C;XRN1;RUFY3;RELCH;KCTD12;ZFPM2;ATF6;ALDH7A1;CLOCK;MAOB;MAGED1;CEP85L;MYCBP2;DCUN1D1;MTMR9;NEDD4L;SLAIN2;GIGYF2;TTBK2;EPB41L5;PRKAR2A;DHX36;MAP4;RIMKLB;ARGLU1;SCAI;DTNA;HOMER1;INTS2;EXOC6B;PRRC2C;BBIP1;PHC3;ACADSB;PBX1;MED13L;PUM2;CCDC…
CAG Length-Dependent Genes In dSPNs Of HD Mice Genes Down-Regulated In PMID32681824	HDSigDB 2021	DiestVMaleAccent1 (Diestrus vs Male, female high/KO upreg, male low/KO downreg)	332	2718	3.46837e-47	2.98791	2.84907e-49	333.987	CYFIP2;NCKAP1;AHCYL1;TRIO;PLEKHB2;ZFYVE9;FRMPD4;WIPF2;ABAT;ACTB;DCAF6;ALKBH5;SYNGAP1;DPYSL5;ZMIZ1;PPP4R4;GPBP1;CHORDC1;TBC1D22A;PKNOX2;CALN1;AGFG1;MEF2A;MED1;UNC13C;PRKCI;MRTFB;RFX3;ANK3;HPCAL4;RC3H2;ATG12;BCR;MOSMO;STX1B;SIK3;HECA;ATF6;CLOCK;NECAB1;MEAF6;DCUN1D1;AGAP2;NOLC1;NEDD4L;BAZ2A;MTMR4;NYAP2;IQGAP2;MAP2;ARGLU1;RAB11FIP4;CREBBP;EGR2;FZD3;GSTM1;EGR3;PHC1;HOMER1;NEBL;TIPARP;IRF2BP2;PHC3;PBX1…
CAG Length-Dependent Genes In dSPNs Of HD Mice Genes Down-Regulated In PMID32681824	HDSigDB 2021	Union of DiestVMaleAccent3 and EstVMaleAccent3 (female low/KO downreg, male high/KO upreg)	332	2718	3.46837e-47	2.98791	2.84907e-49	333.987	CYFIP2;NCKAP1;AHCYL1;TRIO;PLEKHB2;ZFYVE9;FRMPD4;WIPF2;ABAT;ACTB;DCAF6;ALKBH5;SYNGAP1;DPYSL5;ZMIZ1;PPP4R4;GPBP1;CHORDC1;TBC1D22A;PKNOX2;CALN1;AGFG1;MEF2A;MED1;UNC13C;PRKCI;MRTFB;RFX3;ANK3;HPCAL4;RC3H2;ATG12;BCR;MOSMO;STX1B;SIK3;HECA;ATF6;CLOCK;NECAB1;MEAF6;DCUN1D1;AGAP2;NOLC1;NEDD4L;BAZ2A;MTMR4;NYAP2;IQGAP2;MAP2;ARGLU1;RAB11FIP4;CREBBP;EGR2;FZD3;GSTM1;EGR3;PHC1;HOMER1;NEBL;TIPARP;IRF2BP2;PHC3;PBX1…
CAG Length-Dependent Genes In iSPNs Of HD Mice PMID32681824	HDSigDB 2021	DiestVMaleAccent1 (Diestrus vs Male, female high/KO upreg, male low/KO downreg)	283	2119	1.2164e-46	3.21526	1.0518e-48	355.201	ITSN2;CYFIP2;NCKAP1;CHIC1;AHCYL1;PANK3;SPARC;FRMPD4;NEXMIF;WIPF2;ARAF;ABAT;DCAF6;PREX2;SYNGAP1;PPP4R4;DPYSL3;SOX6;GLUL;CALN1;PRKCI;MRTFB;FRS2;PHKA1;SOX11;HPCAL4;UHMK1;BCR;MOSMO;RUFY3;ATF7;ZFPM2;ATF6;NECAB1;MAOB;EPAS1;PDE1A;MYCBP2;AGAP2;NOLC1;PIK3R1;NYAP2;IQGAP2;LARP1;PRKAR2A;RAD21;SCAI;GSTM1;EGR3;HOMER1;HOMER2;TIPARP;EDEM1;EXOC6B;IRF2BP2;HSPA12A;GNG12;DCLK1;ST18;PUM2;CCDC88A;EHD3;AGO4;MYO5B;CPEB2…
CAG Length-Dependent Genes In iSPNs Of HD Mice PMID32681824	HDSigDB 2021	Union of DiestVMaleAccent3 and EstVMaleAccent3 (female low/KO downreg, male high/KO upreg)	283	2119	1.2164e-46	3.21526	1.0518e-48	355.201	ITSN2;CYFIP2;NCKAP1;CHIC1;AHCYL1;PANK3;SPARC;FRMPD4;NEXMIF;WIPF2;ARAF;ABAT;DCAF6;PREX2;SYNGAP1;PPP4R4;DPYSL3;SOX6;GLUL;CALN1;PRKCI;MRTFB;FRS2;PHKA1;SOX11;HPCAL4;UHMK1;BCR;MOSMO;RUFY3;ATF7;ZFPM2;ATF6;NECAB1;MAOB;EPAS1;PDE1A;MYCBP2;AGAP2;NOLC1;PIK3R1;NYAP2;IQGAP2;LARP1;PRKAR2A;RAD21;SCAI;GSTM1;EGR3;HOMER1;HOMER2;TIPARP;EDEM1;EXOC6B;IRF2BP2;HSPA12A;GNG12;DCLK1;ST18;PUM2;CCDC88A;EHD3;AGO4;MYO5B;CPEB2…
Genes Up-Regulated In iSPNs Of zQ175DN Vs HdhQ20 PMID32681824	HDSigDB 2021	DiestVMaleAccent1 (Diestrus vs Male, female high/KO upreg, male low/KO downreg)	290	2212	2.42332e-46	3.15853	2.20016e-48	346.603	ITSN2;CYFIP1;CHIC1;PANK3;SPARC;NEXMIF;IPP;PREX2;GPBP1;DPYSL3;SOX6;GLUL;PAQR8;FRS2;PHKA1;ANK2;SOX11;THAP2;UHMK1;MOSMO;SNHG14;PPP1R3C;XRN1;RUFY3;SUCLG2;ATF7;RELCH;ZFPM2;RIN2;MEAF6;MAOB;EPAS1;PDE1A;CEP85L;MYCBP2;PIK3R1;NYAP2;TTBK2;EPB41L5;PRKAR2A;RAD21;DHX36;MCMBP;SCAI;PCK2;GSTM1;DTNA;HOMER2;TIPARP;EDEM1;INTS2;IQSEC3;PRRC2C;IRF2BP2;BBIP1;HSPA12A;GNG12;ACADSB;ST18;PUM2;CCDC88A;EHD3;AGO1;CPEB2;CDK14;G…
Genes Up-Regulated In iSPNs Of zQ175DN Vs HdhQ20 PMID32681824	HDSigDB 2021	Union of DiestVMaleAccent3 and EstVMaleAccent3 (female low/KO downreg, male high/KO upreg)	290	2212	2.42332e-46	3.15853	2.20016e-48	346.603	ITSN2;CYFIP1;CHIC1;PANK3;SPARC;NEXMIF;IPP;PREX2;GPBP1;DPYSL3;SOX6;GLUL;PAQR8;FRS2;PHKA1;ANK2;SOX11;THAP2;UHMK1;MOSMO;SNHG14;PPP1R3C;XRN1;RUFY3;SUCLG2;ATF7;RELCH;ZFPM2;RIN2;MEAF6;MAOB;EPAS1;PDE1A;CEP85L;MYCBP2;PIK3R1;NYAP2;TTBK2;EPB41L5;PRKAR2A;RAD21;DHX36;MCMBP;SCAI;PCK2;GSTM1;DTNA;HOMER2;TIPARP;EDEM1;INTS2;IQSEC3;PRRC2C;IRF2BP2;BBIP1;HSPA12A;GNG12;ACADSB;ST18;PUM2;CCDC88A;EHD3;AGO1;CPEB2;CDK14;G…
Genes Down-Regulated In iSPNs Of HD Patients Vs Control PMID32681824	HDSigDB 2021	DiestVMaleAccent1 (Diestrus vs Male, female high/KO upreg, male low/KO downreg)	389	3516	4.35459e-46	2.75568	4.14185e-48	300.653	ITSN2;CYFIP2;NCKAP1;TRIO;ZFYVE9;TRRAP;FRMPD4;NEXMIF;WIPF2;ABAT;ALKBH8;DCAF6;PREX2;SYNGAP1;RNF114;SCP2;DPYSL5;PPP4R4;GPBP1;CDK5RAP1;PKNOX2;MEF2A;PRKCI;FRS2;ATG12;BCR;RUFY3;ATF6;CLOCK;MTMR1;NEDD4L;MTMR4;NYAP2;SULT1A1;EPB41L5;CREBBP;FZD3;PHC1;HOMER1;EXOC6B;PRRC2C;BBIP1;PHC3;TMEM196;FAM135B;LAS1L;AGO3;AGO4;AGO2;CDK12;CPEB2;CDK14;PAM;SFXN5;SMG1;SETD2;NRSN1;CLTC;ADK;FMN2;SMG7;LYST;PCMTD2;NIPBL;LIN52;PC…
Genes Down-Regulated In iSPNs Of HD Patients Vs Control PMID32681824	HDSigDB 2021	Union of DiestVMaleAccent3 and EstVMaleAccent3 (female low/KO downreg, male high/KO upreg)	389	3516	4.35459e-46	2.75568	4.14185e-48	300.653	ITSN2;CYFIP2;NCKAP1;TRIO;ZFYVE9;TRRAP;FRMPD4;NEXMIF;WIPF2;ABAT;ALKBH8;DCAF6;PREX2;SYNGAP1;RNF114;SCP2;DPYSL5;PPP4R4;GPBP1;CDK5RAP1;PKNOX2;MEF2A;PRKCI;FRS2;ATG12;BCR;RUFY3;ATF6;CLOCK;MTMR1;NEDD4L;MTMR4;NYAP2;SULT1A1;EPB41L5;CREBBP;FZD3;PHC1;HOMER1;EXOC6B;PRRC2C;BBIP1;PHC3;TMEM196;FAM135B;LAS1L;AGO3;AGO4;AGO2;CDK12;CPEB2;CDK14;PAM;SFXN5;SMG1;SETD2;NRSN1;CLTC;ADK;FMN2;SMG7;LYST;PCMTD2;NIPBL;LIN52;PC…
NP2 Neural Progenitor Cell-Enriched Genes PMID30078729	HDSigDB 2021	DiestVMaleAccent1 (Diestrus vs Male, female high/KO upreg, male low/KO downreg)	476	4783	6.74212e-46	2.58028	6.70423e-48	280.274	CYFIP2;NCKAP1;CHIC1;GMFB;TRIO;TRRAP;NEXMIF;WIPF2;ARAF;ABAT;MSANTD4;ALKBH5;RNF114;DPYSL5;ZMIZ1;GPBP1;DPYSL3;LUC7L;PKNOX2;SAP30BP;RFX3;SOX11;RC3H2;ATG12;BCR;WDR82;ATF6;SET;MEAF6;AGAP2;NOLC1;NEDD4L;BAZ2A;SLAIN2;MTMR4;PLA2G6;GIGYF2;LARP1;PRKAR2A;RAD21;MCMBP;CREBBP;FZD3;GSTM1;PHC1;HOMER1;HOMER2;TIPARP;NCAPH2;PRRC2C;IRF2BP2;BBIP1;PHC3;PBX1;POU6F1;SLC6A8;LAS1L;AGO4;AGO1;NMT1;FXYD6;CDK12;CPEB2;CDK14;GSTM…
NP2 Neural Progenitor Cell-Enriched Genes PMID30078729	HDSigDB 2021	Union of DiestVMaleAccent3 and EstVMaleAccent3 (female low/KO downreg, male high/KO upreg)	476	4783	6.74212e-46	2.58028	6.70423e-48	280.274	CYFIP2;NCKAP1;CHIC1;GMFB;TRIO;TRRAP;NEXMIF;WIPF2;ARAF;ABAT;MSANTD4;ALKBH5;RNF114;DPYSL5;ZMIZ1;GPBP1;DPYSL3;LUC7L;PKNOX2;SAP30BP;RFX3;SOX11;RC3H2;ATG12;BCR;WDR82;ATF6;SET;MEAF6;AGAP2;NOLC1;NEDD4L;BAZ2A;SLAIN2;MTMR4;PLA2G6;GIGYF2;LARP1;PRKAR2A;RAD21;MCMBP;CREBBP;FZD3;GSTM1;PHC1;HOMER1;HOMER2;TIPARP;NCAPH2;PRRC2C;IRF2BP2;BBIP1;PHC3;PBX1;POU6F1;SLC6A8;LAS1L;AGO4;AGO1;NMT1;FXYD6;CDK12;CPEB2;CDK14;GSTM…
Genes Changed In iSPNs Of zQ175DN Vs HdhQ20 PMID32681824	HDSigDB 2021	DiestVMaleAccent1 (Diestrus vs Male, female high/KO upreg, male low/KO downreg)	414	3930	3.01367e-44	2.63655	3.12703e-46	276.254	ITSN2;CYFIP2;CYFIP1;NCKAP1;CHIC1;FRMPD4;NEXMIF;WIPF2;ARAF;IPP;ABAT;DCAF6;PREX2;SYNGAP1;PPP4R4;GPBP1;DPYSL3;CDK5RAP1;PRKCI;MRTFB;FRS2;PHKA1;SOX11;HPCAL4;BCR;MOSMO;WDR82;RUFY3;ATF7;ATF6;SET;ANAPC15;MEAF6;CEP85L;AGAP2;NOLC1;NEDD4L;NYAP2;EPB41L5;PRKAR2A;RAD21;MCMBP;GSTM3;GSTM1;HOMER1;HOMER2;TIPARP;NCAPH2;EDEM1;PRRC2C;IRF2BP2;BBIP1;ST18;EHD3;AGO4;AGO1;CPEB2;CDK14;GSTM5;CPEB4;CDK16;PYGB;SMG1;BTG1;CDKN1…
Genes Changed In iSPNs Of zQ175DN Vs HdhQ20 PMID32681824	HDSigDB 2021	Union of DiestVMaleAccent3 and EstVMaleAccent3 (female low/KO downreg, male high/KO upreg)	414	3930	3.01367e-44	2.63655	3.12703e-46	276.254	ITSN2;CYFIP2;CYFIP1;NCKAP1;CHIC1;FRMPD4;NEXMIF;WIPF2;ARAF;IPP;ABAT;DCAF6;PREX2;SYNGAP1;PPP4R4;GPBP1;DPYSL3;CDK5RAP1;PRKCI;MRTFB;FRS2;PHKA1;SOX11;HPCAL4;BCR;MOSMO;WDR82;RUFY3;ATF7;ATF6;SET;ANAPC15;MEAF6;CEP85L;AGAP2;NOLC1;NEDD4L;NYAP2;EPB41L5;PRKAR2A;RAD21;MCMBP;GSTM3;GSTM1;HOMER1;HOMER2;TIPARP;NCAPH2;EDEM1;PRRC2C;IRF2BP2;BBIP1;ST18;EHD3;AGO4;AGO1;CPEB2;CDK14;GSTM5;CPEB4;CDK16;PYGB;SMG1;BTG1;CDKN1…
CAG Length-Dependent Genes In iSPNs Of HD Mice Genes Up-Regulated In PMID32681824	HDSigDB 2021	DiestVMaleAccent1 (Diestrus vs Male, female high/KO upreg, male low/KO downreg)	212	1398	3.95492e-42	3.56157	4.27466e-44	355.662	ITSN2;CHIC1;PANK3;SPARC;NEXMIF;PREX2;DPYSL3;SOX6;GLUL;FRS2;PHKA1;SOX11;UHMK1;MOSMO;RUFY3;ATF7;ZFPM2;MAOB;EPAS1;PDE1A;MYCBP2;PIK3R1;NYAP2;LARP1;PRKAR2A;RAD21;SCAI;GSTM1;HOMER2;TIPARP;EDEM1;EXOC6B;IRF2BP2;HSPA12A;GNG12;ST18;PUM2;CCDC88A;EHD3;CPEB2;GSTM5;CPEB4;PYGB;BTG1;CITED2;SNX12;TFCP2L1;FMN2;ARHGAP5;IER3IP1;NIPBL;MED13;NHSL1;NKRF;REV3L;IDS;SPTAN1;TEAD1;LIN52;ZCCHC24;CNOT6L;WDR37;STRBP;TSC22D2;FO…
CAG Length-Dependent Genes In iSPNs Of HD Mice Genes Up-Regulated In PMID32681824	HDSigDB 2021	Union of DiestVMaleAccent3 and EstVMaleAccent3 (female low/KO downreg, male high/KO upreg)	212	1398	3.95492e-42	3.56157	4.27466e-44	355.662	ITSN2;CHIC1;PANK3;SPARC;NEXMIF;PREX2;DPYSL3;SOX6;GLUL;FRS2;PHKA1;SOX11;UHMK1;MOSMO;RUFY3;ATF7;ZFPM2;MAOB;EPAS1;PDE1A;MYCBP2;PIK3R1;NYAP2;LARP1;PRKAR2A;RAD21;SCAI;GSTM1;HOMER2;TIPARP;EDEM1;EXOC6B;IRF2BP2;HSPA12A;GNG12;ST18;PUM2;CCDC88A;EHD3;CPEB2;GSTM5;CPEB4;PYGB;BTG1;CITED2;SNX12;TFCP2L1;FMN2;ARHGAP5;IER3IP1;NIPBL;MED13;NHSL1;NKRF;REV3L;IDS;SPTAN1;TEAD1;LIN52;ZCCHC24;CNOT6L;WDR37;STRBP;TSC22D2;FO…
Liver RNA M1 Module (Turquoise) PMID26900923	HDSigDB 2021	DiestVMaleAccent1 (Diestrus vs Male, female high/KO upreg, male low/KO downreg)	196	1230	7.07697e-42	3.74188	7.95509e-44	371.344	ITSN2;NCKAP1;GMFB;TRIO;PANK3;TRRAP;DCAF6;GPBP1;SOX6;AGFG1;FRS2;RC3H2;UHMK1;AR;SNHG14;MARF1;XRN1;XRN2;SIK3;ATF7;HECA;MTMR1;IQGAP2;TTBK2;EPB41L5;RAD21;MCMBP;CREBBP;PHC1;TIPARP;PRRC2C;PUM1;GNG12;PHC3;PBX1;MED13L;PUM2;CDK12;PHF3;TOP2B;HBS1L;SMG1;SETD2;AHCTF1;PHF20;RSF1;ARHGAP5;NIPBL;DSTYK;PIP4P2;MED13;DENND11;REV3L;IDS;ARIH1;PCMTD1;UPF2;NCOA1;NCOA2;ZYG11B;CNOT6L;ZHX3;PCYT1A;STRBP;ASH1L;SIRT1;ZHX1;NCO…
Liver RNA M1 Module (Turquoise) PMID26900923	HDSigDB 2021	Union of DiestVMaleAccent3 and EstVMaleAccent3 (female low/KO downreg, male high/KO upreg)	196	1230	7.07697e-42	3.74188	7.95509e-44	371.344	ITSN2;NCKAP1;GMFB;TRIO;PANK3;TRRAP;DCAF6;GPBP1;SOX6;AGFG1;FRS2;RC3H2;UHMK1;AR;SNHG14;MARF1;XRN1;XRN2;SIK3;ATF7;HECA;MTMR1;IQGAP2;TTBK2;EPB41L5;RAD21;MCMBP;CREBBP;PHC1;TIPARP;PRRC2C;PUM1;GNG12;PHC3;PBX1;MED13L;PUM2;CDK12;PHF3;TOP2B;HBS1L;SMG1;SETD2;AHCTF1;PHF20;RSF1;ARHGAP5;NIPBL;DSTYK;PIP4P2;MED13;DENND11;REV3L;IDS;ARIH1;PCMTD1;UPF2;NCOA1;NCOA2;ZYG11B;CNOT6L;ZHX3;PCYT1A;STRBP;ASH1L;SIRT1;ZHX1;NCO…
Genes Down-Regulated In Loxapine Treated STHdhQ111 Vs Control GSE129143	HDSigDB 2021	DiestVMaleAccent1 (Diestrus vs Male, female high/KO upreg, male low/KO downreg)	205	1348	8.27537e-41	3.55422	9.65996e-43	343.847	CYFIP1;TRIO;WIPF2;IPP;ALKBH8;SOX5;OXSM;MRTFB;ANK3;ASRGL1;MTURN;BCR;WDR82;SIK3;SUCLG2;ATF7;KCTD12;ZFPM2;MTMR1;MYCBP2;MTMR9;BAZ2A;SLAIN2;MTMR4;TTBK2;DECR2;RAB11FIP4;GSTM1;PHC1;EXOC6B;PUM1;PHC3;ACADSB;PBX1;DCLK1;POU6F1;EHD3;AGO4;AGO1;AGO2;CDK12;CDK14;EZH1;GSTM5;PYGB;TOP2B;LRSAM1;CDKN1B;HIP1;SETD7;CROT;SH3RF1;NIPBL;DSTYK;PIP4P2;SIPA1L1;TRIM2;IDS;ACADM;ARIH1;SPTAN1;NCOA1;ZCCHC24;NCOA2;ZYG11B;LYNX1;ZHX…
Genes Down-Regulated In Loxapine Treated STHdhQ111 Vs Control GSE129143	HDSigDB 2021	Union of DiestVMaleAccent3 and EstVMaleAccent3 (female low/KO downreg, male high/KO upreg)	205	1348	8.27537e-41	3.55422	9.65996e-43	343.847	CYFIP1;TRIO;WIPF2;IPP;ALKBH8;SOX5;OXSM;MRTFB;ANK3;ASRGL1;MTURN;BCR;WDR82;SIK3;SUCLG2;ATF7;KCTD12;ZFPM2;MTMR1;MYCBP2;MTMR9;BAZ2A;SLAIN2;MTMR4;TTBK2;DECR2;RAB11FIP4;GSTM1;PHC1;EXOC6B;PUM1;PHC3;ACADSB;PBX1;DCLK1;POU6F1;EHD3;AGO4;AGO1;AGO2;CDK12;CDK14;EZH1;GSTM5;PYGB;TOP2B;LRSAM1;CDKN1B;HIP1;SETD7;CROT;SH3RF1;NIPBL;DSTYK;PIP4P2;SIPA1L1;TRIM2;IDS;ACADM;ARIH1;SPTAN1;NCOA1;ZCCHC24;NCOA2;ZYG11B;LYNX1;ZHX…
Genes Changed In Endothelial Cells Of HD Patients Vs Control PMID32681824	HDSigDB 2021	DiestVMaleAccent1 (Diestrus vs Male, female high/KO upreg, male low/KO downreg)	289	2357	2.1932e-40	2.89668	2.65497e-42	277.306	ITSN2;NCKAP1;AHCYL1;TRIO;PLEKHB2;ZFYVE9;TRRAP;WIPF2;ACTB;DCAF6;RPS6KA3;ZMIZ1;GPBP1;CHORDC1;LUC7L;TBC1D22A;AGFG1;SOX5;RFX3;ANK2;ASRGL1;BCR;XRN1;RUFY3;XRN2;SIK3;ATF6;RIN2;CLOCK;MYCBP2;NEDD4L;BAZ2A;PIK3R1;GIGYF2;TTBK2;EPB41L5;LARP1;SRPK2;CREBBP;DTNA;NEBL;SMARCA5;PRRC2C;IRF2BP2;PUM1;GNG12;PHC3;PBX1;ST18;MED13L;FOSL2;PUM2;CCDC88A;PEX5L;AGO3;AGO4;AGO2;CPEB2;CDK14;PAM;CPEB4;PHF3;TOP2B;HBS1L;SMG1;SETD2;A…
Genes Changed In Endothelial Cells Of HD Patients Vs Control PMID32681824	HDSigDB 2021	Union of DiestVMaleAccent3 and EstVMaleAccent3 (female low/KO downreg, male high/KO upreg)	289	2357	2.1932e-40	2.89668	2.65497e-42	277.306	ITSN2;NCKAP1;AHCYL1;TRIO;PLEKHB2;ZFYVE9;TRRAP;WIPF2;ACTB;DCAF6;RPS6KA3;ZMIZ1;GPBP1;CHORDC1;LUC7L;TBC1D22A;AGFG1;SOX5;RFX3;ANK2;ASRGL1;BCR;XRN1;RUFY3;XRN2;SIK3;ATF6;RIN2;CLOCK;MYCBP2;NEDD4L;BAZ2A;PIK3R1;GIGYF2;TTBK2;EPB41L5;LARP1;SRPK2;CREBBP;DTNA;NEBL;SMARCA5;PRRC2C;IRF2BP2;PUM1;GNG12;PHC3;PBX1;ST18;MED13L;FOSL2;PUM2;CCDC88A;PEX5L;AGO3;AGO4;AGO2;CPEB2;CDK14;PAM;CPEB4;PHF3;TOP2B;HBS1L;SMG1;SETD2;A…
Genes Changed In Nicotinamide Treated STHdhQ111 Vs Control GSE129143	HDSigDB 2021	DiestVMaleAccent1 (Diestrus vs Male, female high/KO upreg, male low/KO downreg)	178	1076	5.44037e-40	3.86579	6.82104e-42	366.433	ITSN2;OTUD4;CYFIP1;NCKAP1;DGKD;PANK3;UBE3C;TRRAP;UBE3A;ARHGAP35;RPS6KA3;PAIP2B;SLK;KPNA6;PPFIA1;EP300;ARID2;KPNA1;OXSM;MRTFB;AP1B1;FRS2;UHMK1;BCR;TANC1;RALGAPB;XRN1;XRN2;PKP4;CLOCK;ANAPC1;XPR1;ATP6V1A;MTMR1;DNMT1;INO80D;CUL5;ABHD2;CLEC16A;MTMR9;BAZ2A;SLAIN2;PDS5B;RASAL2;MTMR4;PDS5A;TTBK2;ARHGAP12;CAMSAP2;KIF3B;UBR5;EIF4EBP2;ABL2;SOCS7;KLHDC10;SPECC1;ANKRD26;CBX5;CPSF6;DENND4A;EDEM1;CEP350;SEC16A;…
Genes Changed In Nicotinamide Treated STHdhQ111 Vs Control GSE129143	HDSigDB 2021	Union of DiestVMaleAccent3 and EstVMaleAccent3 (female low/KO downreg, male high/KO upreg)	178	1076	5.44037e-40	3.86579	6.82104e-42	366.433	ITSN2;OTUD4;CYFIP1;NCKAP1;DGKD;PANK3;UBE3C;TRRAP;UBE3A;ARHGAP35;RPS6KA3;PAIP2B;SLK;KPNA6;PPFIA1;EP300;ARID2;KPNA1;OXSM;MRTFB;AP1B1;FRS2;UHMK1;BCR;TANC1;RALGAPB;XRN1;XRN2;PKP4;CLOCK;ANAPC1;XPR1;ATP6V1A;MTMR1;DNMT1;INO80D;CUL5;ABHD2;CLEC16A;MTMR9;BAZ2A;SLAIN2;PDS5B;RASAL2;MTMR4;PDS5A;TTBK2;ARHGAP12;CAMSAP2;KIF3B;UBR5;EIF4EBP2;ABL2;SOCS7;KLHDC10;SPECC1;ANKRD26;CBX5;CPSF6;DENND4A;EDEM1;CEP350;SEC16A;…
Top OPC-expressed Genes In Humans And Mice PMID29892006	HDSigDB 2021	DiestVMaleAccent1 (Diestrus vs Male, female high/KO upreg, male low/KO downreg)	170	1000	1.17106e-39	3.97517	1.51888e-41	373.618	CYFIP2;CYFIP1;NCKAP1;GMFB;PANK3;SPARC;CTNND2;ABAT;ACTB;IPO5;DOCK10;ZMIZ1;PPP2R1A;DPYSL3;LUC7L;TNR;SOX6;GLUL;AGFG1;PPP1R16B;S100A1;MAGI2;DYRK1A;ANK2;MMD2;SOX11;ANK3;TUG1;MYT1;ASRGL1;ATG12;ILF3;XRN1;RUFY3;SELENOP;SREK1;XIST;RIN2;XPR1;ATP6V1A;SET;KMT2A;EPAS1;MAGED1;KMT2C;ABHD2;MYCBP2;SLC1A2;PDS5B;NDRG2;ARHGAP12;MAP2;RAD21;UBR5;TASOR;MCMBP;LRRC4C;RIMKLB;SKIL;ARGLU1;MCL1;SRPK2;HSPA8;TCAF1;UBE2H;CBX5;C…
Top OPC-expressed Genes In Humans And Mice PMID29892006	HDSigDB 2021	Union of DiestVMaleAccent3 and EstVMaleAccent3 (female low/KO downreg, male high/KO upreg)	170	1000	1.17106e-39	3.97517	1.51888e-41	373.618	CYFIP2;CYFIP1;NCKAP1;GMFB;PANK3;SPARC;CTNND2;ABAT;ACTB;IPO5;DOCK10;ZMIZ1;PPP2R1A;DPYSL3;LUC7L;TNR;SOX6;GLUL;AGFG1;PPP1R16B;S100A1;MAGI2;DYRK1A;ANK2;MMD2;SOX11;ANK3;TUG1;MYT1;ASRGL1;ATG12;ILF3;XRN1;RUFY3;SELENOP;SREK1;XIST;RIN2;XPR1;ATP6V1A;SET;KMT2A;EPAS1;MAGED1;KMT2C;ABHD2;MYCBP2;SLC1A2;PDS5B;NDRG2;ARHGAP12;MAP2;RAD21;UBR5;TASOR;MCMBP;LRRC4C;RIMKLB;SKIL;ARGLU1;MCL1;SRPK2;HSPA8;TCAF1;UBE2H;CBX5;C…
Genes Down-Regulated In Sodium Butyrate Treated STHdhQ111 Vs Control GSE129143	HDSigDB 2021	DiestVMaleAccent1 (Diestrus vs Male, female high/KO upreg, male low/KO downreg)	261	2046	6.09299e-39	2.97903	8.16613e-41	274.982	ITSN2;NCKAP1;GMFB;TRIO;PANK3;ZFYVE9;TRRAP;KLHDC7A;ALKBH8;RPS6KA3;ALKBH5;MEF2A;MRTFB;AP1B1;PHKA1;THAP2;UHMK1;BCR;MARF1;XRN1;XRN2;ATF7;RELCH;ATF6;CLOCK;MTMR1;MYCBP2;BAZ2A;SLAIN2;MTMR4;PRKAR2A;STXBP5;CREBBP;PHC1;EDEM1;INTS2;EXOC6B;PRRC2C;PHC3;MED13L;PUM2;AGO4;AGO1;AGO2;CDK12;CPEB2;CDK14;CPEB4;PHF3;TOP2B;SMG1;AHCTF1;CDKN1B;SETD7;RSF1;TFCP2L1;CROT;OSBPL11;SH3RF1;NIPBL;DSTYK;PIP4P2;MED13;NCS1;REV3L;ARI…
Genes Down-Regulated In Sodium Butyrate Treated STHdhQ111 Vs Control GSE129143	HDSigDB 2021	Union of DiestVMaleAccent3 and EstVMaleAccent3 (female low/KO downreg, male high/KO upreg)	261	2046	6.09299e-39	2.97903	8.16613e-41	274.982	ITSN2;NCKAP1;GMFB;TRIO;PANK3;ZFYVE9;TRRAP;KLHDC7A;ALKBH8;RPS6KA3;ALKBH5;MEF2A;MRTFB;AP1B1;PHKA1;THAP2;UHMK1;BCR;MARF1;XRN1;XRN2;ATF7;RELCH;ATF6;CLOCK;MTMR1;MYCBP2;BAZ2A;SLAIN2;MTMR4;PRKAR2A;STXBP5;CREBBP;PHC1;EDEM1;INTS2;EXOC6B;PRRC2C;PHC3;MED13L;PUM2;AGO4;AGO1;AGO2;CDK12;CPEB2;CDK14;CPEB4;PHF3;TOP2B;SMG1;AHCTF1;CDKN1B;SETD7;RSF1;TFCP2L1;CROT;OSBPL11;SH3RF1;NIPBL;DSTYK;PIP4P2;MED13;NCS1;REV3L;ARI…
Genes Up-Regulated In Myotonic Dystrophy 1 Markers In Human Skeletal Muscle E-D-7014	HDSigDB 2021	DiestVMaleAccent1 (Diestrus vs Male, female high/KO upreg, male low/KO downreg)	297	2509	1.05846e-38	2.78672	1.46437e-40	255.604	CYFIP2;CHIC1;TRIO;SPARC;TRRAP;WIPF2;IPP;IKZF2;DCAF6;SCP2;GPBP1;CDK5RAP1;LUC7L;SOX6;MEF2A;MED1;MEF2C;MRTFB;PHKA1;ANK2;ANK3;RC3H2;MTURN;AR;PPP1R3C;XRN1;RUFY3;KCTD12;ALDH7A1;CLOCK;SET;MAGED1;PDE1A;CEP85L;MYCBP2;DCUN1D1;MTMR9;NEDD4L;SLAIN2;SMIM7;TTBK2;EPB41L5;PRKAR2A;DHX36;MAP4;RIMKLB;ARGLU1;SCAI;DTNA;HOMER1;INTS2;PRRC2C;BBIP1;PHC3;ACADSB;PBX1;DCLK1;MED13L;PUM2;CCDC88A;LAS1L;AGO4;KYAT3;ECHDC1;ANP32E;…
Genes Up-Regulated In Myotonic Dystrophy 1 Markers In Human Skeletal Muscle E-D-7014	HDSigDB 2021	Union of DiestVMaleAccent3 and EstVMaleAccent3 (female low/KO downreg, male high/KO upreg)	297	2509	1.05846e-38	2.78672	1.46437e-40	255.604	CYFIP2;CHIC1;TRIO;SPARC;TRRAP;WIPF2;IPP;IKZF2;DCAF6;SCP2;GPBP1;CDK5RAP1;LUC7L;SOX6;MEF2A;MED1;MEF2C;MRTFB;PHKA1;ANK2;ANK3;RC3H2;MTURN;AR;PPP1R3C;XRN1;RUFY3;KCTD12;ALDH7A1;CLOCK;SET;MAGED1;PDE1A;CEP85L;MYCBP2;DCUN1D1;MTMR9;NEDD4L;SLAIN2;SMIM7;TTBK2;EPB41L5;PRKAR2A;DHX36;MAP4;RIMKLB;ARGLU1;SCAI;DTNA;HOMER1;INTS2;PRRC2C;BBIP1;PHC3;ACADSB;PBX1;DCLK1;MED13L;PUM2;CCDC88A;LAS1L;AGO4;KYAT3;ECHDC1;ANP32E;…
NP1a Neural Progenitor Cell-Enriched Genes PMID30078729	HDSigDB 2021	DiestVMaleAccent1 (Diestrus vs Male, female high/KO upreg, male low/KO downreg)	317	2784	2.51272e-38	2.69317	3.58495e-40	244.612	CYFIP1;AHCYL1;TRIO;PANK3;SPARC;TRRAP;ARAF;ABAT;ACTB;ALKBH5;RNF114;DPYSL5;ZMIZ1;PPP2R1A;GPBP1;DPYSL3;CHORDC1;LUC7L;CIAO2A;SOX6;GLUL;RFX3;ANK2;SOX11;ANK3;RC3H2;ATG12;WDR82;XRN2;ATF6;SET;MAGED1;MYCBP2;DCUN1D1;NOLC1;BAZ2A;PIK3R1;SMIM7;GIGYF2;LARP1;MAP2;RAD21;DPH3;MAP4;RIMKLB;ARGLU1;SRPK2;CREBBP;FZD3;GSTM1;TIPARP;NCAPH2;SMARCA5;PRRC2C;IRF2BP2;BBIP1;PUM1;PBX1;DCLK1;MED13L;POU6F1;PUM2;CCDC88A;AGO1;NMT1;…
NP1a Neural Progenitor Cell-Enriched Genes PMID30078729	HDSigDB 2021	Union of DiestVMaleAccent3 and EstVMaleAccent3 (female low/KO downreg, male high/KO upreg)	317	2784	2.51272e-38	2.69317	3.58495e-40	244.612	CYFIP1;AHCYL1;TRIO;PANK3;SPARC;TRRAP;ARAF;ABAT;ACTB;ALKBH5;RNF114;DPYSL5;ZMIZ1;PPP2R1A;GPBP1;DPYSL3;CHORDC1;LUC7L;CIAO2A;SOX6;GLUL;RFX3;ANK2;SOX11;ANK3;RC3H2;ATG12;WDR82;XRN2;ATF6;SET;MAGED1;MYCBP2;DCUN1D1;NOLC1;BAZ2A;PIK3R1;SMIM7;GIGYF2;LARP1;MAP2;RAD21;DPH3;MAP4;RIMKLB;ARGLU1;SRPK2;CREBBP;FZD3;GSTM1;TIPARP;NCAPH2;SMARCA5;PRRC2C;IRF2BP2;BBIP1;PUM1;PBX1;DCLK1;MED13L;POU6F1;PUM2;CCDC88A;AGO1;NMT1;…
The Global Proteome Data Of The Soluble Fraction From The Brains Of Q175 And WT Mice PMID31138642	HDSigDB 2021	DiestVMaleAccent1 (Diestrus vs Male, female high/KO upreg, male low/KO downreg)	401	4003	4.31133e-37	2.43281	6.33745e-39	213.977	ITSN2;CYFIP2;CYFIP1;NCKAP1;GMFB;TRIO;WIPF2;ARAF;ABAT;SYNGAP1;SCP2;DPYSL5;DPYSL3;PRKCI;MRTFB;PHKA1;HPCAL4;BCR;WDR82;RUFY3;MTMR1;LXN;SET;AGAP2;MTMR9;NEDD4L;SLAIN2;NYAP2;PLA2G6;IQGAP2;LARP1;PRKAR2A;RAD21;GSTM3;GSTM1;HOMER1;NEBL;EXOC6B;PRRC2C;PRDX6;PBX1;EHD3;AGO1;AGO2;NMT1;CDK14;PAM;SFXN5;GSTM5;PYGB;LRSAM1;CDKN1B;CLTC;SETD7;SNX12;ADK;PYGM;FMN2;ARHGAP5;OSBPL11;WDR44;TRIM2;AP3S2;WDR37;FN3KRP;FAM126B;PT…
The Global Proteome Data Of The Soluble Fraction From The Brains Of Q175 And WT Mice PMID31138642	HDSigDB 2021	Union of DiestVMaleAccent3 and EstVMaleAccent3 (female low/KO downreg, male high/KO upreg)	401	4003	4.31133e-37	2.43281	6.33745e-39	213.977	ITSN2;CYFIP2;CYFIP1;NCKAP1;GMFB;TRIO;WIPF2;ARAF;ABAT;SYNGAP1;SCP2;DPYSL5;DPYSL3;PRKCI;MRTFB;PHKA1;HPCAL4;BCR;WDR82;RUFY3;MTMR1;LXN;SET;AGAP2;MTMR9;NEDD4L;SLAIN2;NYAP2;PLA2G6;IQGAP2;LARP1;PRKAR2A;RAD21;GSTM3;GSTM1;HOMER1;NEBL;EXOC6B;PRRC2C;PRDX6;PBX1;EHD3;AGO1;AGO2;NMT1;CDK14;PAM;SFXN5;GSTM5;PYGB;LRSAM1;CDKN1B;CLTC;SETD7;SNX12;ADK;PYGM;FMN2;ARHGAP5;OSBPL11;WDR44;TRIM2;AP3S2;WDR37;FN3KRP;FAM126B;PT…
OPC1a Oligodendrocyte Precursor Cell-Enriched Genes PMID30078729	HDSigDB 2021	DiestVMaleAccent1 (Diestrus vs Male, female high/KO upreg, male low/KO downreg)	387	3801	4.57627e-37	2.45844	6.92475e-39	216.013	CYFIP2;CYFIP1;NCKAP1;CHIC1;GMFB;TRIO;TRRAP;WIPF2;ARAF;MSANTD4;ALKBH5;RNF114;ZMIZ1;GPBP1;DPYSL3;LUC7L;SAP30BP;SOX11;RC3H2;WDR82;ATF6;SET;MEAF6;LYPD1;AGAP2;NOLC1;BAZ2A;SLAIN2;PLA2G6;GIGYF2;RAD21;MCMBP;FZD3;GSTM1;HOMER1;TIPARP;NCAPH2;PRRC2C;IRF2BP2;BBIP1;PHC3;PBX1;POU6F1;EHD3;LAS1L;AGO4;NMT1;FXYD6;CDK12;CPEB2;CDK14;GSTM5;CDK16;PHF3;SMG1;SETD2;CDKN1B;PHF20;CLTC;ARHGAP5;SMG7;PCMTD2;NIPBL;PIP4P2;MED13;…
OPC1a Oligodendrocyte Precursor Cell-Enriched Genes PMID30078729	HDSigDB 2021	Union of DiestVMaleAccent3 and EstVMaleAccent3 (female low/KO downreg, male high/KO upreg)	387	3801	4.57627e-37	2.45844	6.92475e-39	216.013	CYFIP2;CYFIP1;NCKAP1;CHIC1;GMFB;TRIO;TRRAP;WIPF2;ARAF;MSANTD4;ALKBH5;RNF114;ZMIZ1;GPBP1;DPYSL3;LUC7L;SAP30BP;SOX11;RC3H2;WDR82;ATF6;SET;MEAF6;LYPD1;AGAP2;NOLC1;BAZ2A;SLAIN2;PLA2G6;GIGYF2;RAD21;MCMBP;FZD3;GSTM1;HOMER1;TIPARP;NCAPH2;PRRC2C;IRF2BP2;BBIP1;PHC3;PBX1;POU6F1;EHD3;LAS1L;AGO4;NMT1;FXYD6;CDK12;CPEB2;CDK14;GSTM5;CDK16;PHF3;SMG1;SETD2;CDKN1B;PHF20;CLTC;ARHGAP5;SMG7;PCMTD2;NIPBL;PIP4P2;MED13;…
NFOL Newly Formed Oligodendrocyte-Enriched Genes PMID30078729	HDSigDB 2021	DiestVMaleAccent1 (Diestrus vs Male, female high/KO upreg, male low/KO downreg)	418	4264	7.61184e-37	2.39535	1.18472e-38	209.183	ITSN2;CYFIP2;CYFIP1;NCKAP1;GMFB;TRIO;TRRAP;WIPF2;ARAF;ABAT;ALKBH5;RNF114;ZMIZ1;GPBP1;DPYSL3;LUC7L;PRKCI;SOX11;RC3H2;ATG12;WDR82;ATF6;SET;NOLC1;NEDD4L;BAZ2A;MTMR4;PLA2G6;GIGYF2;LARP1;RAD21;MCMBP;CREBBP;FZD3;GSTM1;PHC1;HOMER1;HOMER2;TIPARP;PRRC2C;BBIP1;PHC3;PBX1;ST18;EHD3;SLC6A8;AGO3;NMT1;FXYD6;CPEB2;CDK14;GSTM5;CDK16;PHF3;SMG1;SETD2;BTG1;PHF20;CLTC;SETD7;SNX12;ADK;ARHGAP5;SMG7;PCMTD2;NIPBL;DSTYK;M…
NFOL Newly Formed Oligodendrocyte-Enriched Genes PMID30078729	HDSigDB 2021	Union of DiestVMaleAccent3 and EstVMaleAccent3 (female low/KO downreg, male high/KO upreg)	418	4264	7.61184e-37	2.39535	1.18472e-38	209.183	ITSN2;CYFIP2;CYFIP1;NCKAP1;GMFB;TRIO;TRRAP;WIPF2;ARAF;ABAT;ALKBH5;RNF114;ZMIZ1;GPBP1;DPYSL3;LUC7L;PRKCI;SOX11;RC3H2;ATG12;WDR82;ATF6;SET;NOLC1;NEDD4L;BAZ2A;MTMR4;PLA2G6;GIGYF2;LARP1;RAD21;MCMBP;CREBBP;FZD3;GSTM1;PHC1;HOMER1;HOMER2;TIPARP;PRRC2C;BBIP1;PHC3;PBX1;ST18;EHD3;SLC6A8;AGO3;NMT1;FXYD6;CPEB2;CDK14;GSTM5;CDK16;PHF3;SMG1;SETD2;BTG1;PHF20;CLTC;SETD7;SNX12;ADK;ARHGAP5;SMG7;PCMTD2;NIPBL;DSTYK;M…
OPC1b Oligodendrocyte Precursor Cell-Enriched Genes PMID30078729	HDSigDB 2021	DiestVMaleAccent1 (Diestrus vs Male, female high/KO upreg, male low/KO downreg)	346	3239	1.50312e-36	2.5355	2.42875e-38	219.602	CYFIP2;CYFIP1;NCKAP1;GMFB;AHCYL1;TRIO;PANK3;SPARC;TRRAP;ARAF;ACTB;ALKBH5;RNF114;ZMIZ1;PPP2R1A;GPBP1;DPYSL3;CHORDC1;LUC7L;CIAO2A;SOX6;GLUL;SOX5;AP1B1;MMD2;ANK2;SOX11;ANK3;ASRGL1;ATG12;WDR82;XRN2;SUCLG2;RELCH;KCTD12;ATF6;SET;EPAS1;MAGED1;MYCBP2;DCUN1D1;NOLC1;BAZ2A;PIK3R1;SMIM7;GIGYF2;LARP1;MAP2;RAD21;DHX36;DPH3;MAP4;ARGLU1;SCAI;SRPK2;CREBBP;FZD3;GSTM1;PHC1;TIPARP;INTS2;SMARCA5;PRRC2C;IRF2BP2;BBIP1;…
Genes Changed In dSPNs Of HD Patients Vs Control PMID32681824	HDSigDB 2021	DiestVMaleAccent1 (Diestrus vs Male, female high/KO upreg, male low/KO downreg)	351	3309	1.50312e-36	2.52211	2.46947e-38	218.4	ITSN2;CYFIP2;CYFIP1;NCKAP1;TRIO;PANK3;ZFYVE9;TRRAP;NEXMIF;CCNC;ABAT;IKZF2;NUDT5;ACTB;ALKBH8;DCAF6;PREX2;RPS6KA3;RNF114;SCP2;DPYSL5;PPP4R4;GPBP1;CDK5RAP1;TBC1D22A;MEF2A;UNC13C;RFX3;FRS2;MMD2;ANK3;HPCAL4;ATG12;BCR;XRN1;RUFY3;SIK3;ZFPM2;ATF6;RIN2;CLOCK;MTMR1;TMEM87A;NECAB1;MAOB;MAGED1;CEP85L;MYCBP2;NEDD4L;TMTC1;MTMR4;NYAP2;MED12L;SULT1A1;EPB41L5;MAP2;DHX36;STXBP5;RIMKLB;ARGLU1;RAB11FIP4;ZRANB3;FZD3;…
OPC1b Oligodendrocyte Precursor Cell-Enriched Genes PMID30078729	HDSigDB 2021	Union of DiestVMaleAccent3 and EstVMaleAccent3 (female low/KO downreg, male high/KO upreg)	346	3239	1.50312e-36	2.5355	2.42875e-38	219.602	CYFIP2;CYFIP1;NCKAP1;GMFB;AHCYL1;TRIO;PANK3;SPARC;TRRAP;ARAF;ACTB;ALKBH5;RNF114;ZMIZ1;PPP2R1A;GPBP1;DPYSL3;CHORDC1;LUC7L;CIAO2A;SOX6;GLUL;SOX5;AP1B1;MMD2;ANK2;SOX11;ANK3;ASRGL1;ATG12;WDR82;XRN2;SUCLG2;RELCH;KCTD12;ATF6;SET;EPAS1;MAGED1;MYCBP2;DCUN1D1;NOLC1;BAZ2A;PIK3R1;SMIM7;GIGYF2;LARP1;MAP2;RAD21;DHX36;DPH3;MAP4;ARGLU1;SCAI;SRPK2;CREBBP;FZD3;GSTM1;PHC1;TIPARP;INTS2;SMARCA5;PRRC2C;IRF2BP2;BBIP1;…
Genes Changed In dSPNs Of HD Patients Vs Control PMID32681824	HDSigDB 2021	Union of DiestVMaleAccent3 and EstVMaleAccent3 (female low/KO downreg, male high/KO upreg)	351	3309	1.50312e-36	2.52211	2.46947e-38	218.4	ITSN2;CYFIP2;CYFIP1;NCKAP1;TRIO;PANK3;ZFYVE9;TRRAP;NEXMIF;CCNC;ABAT;IKZF2;NUDT5;ACTB;ALKBH8;DCAF6;PREX2;RPS6KA3;RNF114;SCP2;DPYSL5;PPP4R4;GPBP1;CDK5RAP1;TBC1D22A;MEF2A;UNC13C;RFX3;FRS2;MMD2;ANK3;HPCAL4;ATG12;BCR;XRN1;RUFY3;SIK3;ZFPM2;ATF6;RIN2;CLOCK;MTMR1;TMEM87A;NECAB1;MAOB;MAGED1;CEP85L;MYCBP2;NEDD4L;TMTC1;MTMR4;NYAP2;MED12L;SULT1A1;EPB41L5;MAP2;DHX36;STXBP5;RIMKLB;ARGLU1;RAB11FIP4;ZRANB3;FZD3;…
Genes Changed In Foxp2/Olfm3-expressing Neurons Of R6/2 Vs WT PMID32681824	HDSigDB 2021	DiestVMaleAccent1 (Diestrus vs Male, female high/KO upreg, male low/KO downreg)	150	854	1.78663e-36	4.07653	3.01248e-38	352.193	DGKG;TRIO;FRMPD4;DGKB;UBE3A;ABAT;IKZF2;DOCK10;RIMS1;RPS6KA3;SESN3;PPP4R4;TNR;RGS8;PDE8B;CALN1;PPP1R16B;NSF;UNC13C;MAGI2;ANK2;ANK3;BCR;XRN1;LIX1;RUFY3;DOK6;JCAD;XPR1;NECAB1;SHC3;PDE1A;ANKRD12;NEDD4L;LIN7A;RASAL2;MED12L;ATXN1;SNTG1;MAP2;UBR5;ABL2;SRGAP3;KLHDC10;HSPA8;CREBBP;DTNA;HOMER1;NEBL;DENND4A;EXOC6B;PRRC2C;HELZ;PUM1;ARHGAP26;TMEM196;ACADSB;DCLK1;MED13L;ARHGAP33;ARHGAP32;FAM135B;PEX5L;DIAPH2;P…
Genes Changed In Foxp2/Olfm3-expressing Neurons Of R6/2 Vs WT PMID32681824	HDSigDB 2021	Union of DiestVMaleAccent3 and EstVMaleAccent3 (female low/KO downreg, male high/KO upreg)	150	854	1.78663e-36	4.07653	3.01248e-38	352.193	DGKG;TRIO;FRMPD4;DGKB;UBE3A;ABAT;IKZF2;DOCK10;RIMS1;RPS6KA3;SESN3;PPP4R4;TNR;RGS8;PDE8B;CALN1;PPP1R16B;NSF;UNC13C;MAGI2;ANK2;ANK3;BCR;XRN1;LIX1;RUFY3;DOK6;JCAD;XPR1;NECAB1;SHC3;PDE1A;ANKRD12;NEDD4L;LIN7A;RASAL2;MED12L;ATXN1;SNTG1;MAP2;UBR5;ABL2;SRGAP3;KLHDC10;HSPA8;CREBBP;DTNA;HOMER1;NEBL;DENND4A;EXOC6B;PRRC2C;HELZ;PUM1;ARHGAP26;TMEM196;ACADSB;DCLK1;MED13L;ARHGAP33;ARHGAP32;FAM135B;PEX5L;DIAPH2;P…
Genes Up-Regulated In Influence Of Mbnl1 KO On Expression In C2C12 Mouse Cells GSE29990	HDSigDB 2021	DiestVMaleAccent1 (Diestrus vs Male, female high/KO upreg, male low/KO downreg)	457	4899	8.69742e-36	2.30956	1.50409e-37	195.822	CYFIP2;IPO11;TRIO;ZFYVE9;ARAF;DCAF6;PREX2;SYNGAP1;ZMIZ1;GPBP1;DPYSL3;LUC7L;PKNOX2;MEF2A;MED1;PRKAB2;SAP30BP;MEF2C;PRKCI;RFX3;FRS2;PHKA1;SOX11;RC3H2;BCR;MOSMO;AR;RUFY3;ATF7;CLOCK;MTMR1;MEAF6;MTMR9;NEDD4L;MTMR4;IQGAP2;GIGYF2;EPB41L5;LARP1;MCMBP;GSTM3;CREBBP;FZD3;GSTM1;PHC1;HOMER1;EDEM1;PRRC2C;IRF2BP2;BBIP1;PHC3;PRDX6;PBX1;FOSL2;FAM135B;EHD3;AGO3;AGO4;AGO1;CDK14;SFXN5;EZH1;GSTM5;CDK16;LRSAM1;SMG1;SE…
Genes Up-Regulated In Influence Of Mbnl1 KO On Expression In C2C12 Mouse Cells GSE29990	HDSigDB 2021	Union of DiestVMaleAccent3 and EstVMaleAccent3 (female low/KO downreg, male high/KO upreg)	457	4899	8.69742e-36	2.30956	1.50409e-37	195.822	CYFIP2;IPO11;TRIO;ZFYVE9;ARAF;DCAF6;PREX2;SYNGAP1;ZMIZ1;GPBP1;DPYSL3;LUC7L;PKNOX2;MEF2A;MED1;PRKAB2;SAP30BP;MEF2C;PRKCI;RFX3;FRS2;PHKA1;SOX11;RC3H2;BCR;MOSMO;AR;RUFY3;ATF7;CLOCK;MTMR1;MEAF6;MTMR9;NEDD4L;MTMR4;IQGAP2;GIGYF2;EPB41L5;LARP1;MCMBP;GSTM3;CREBBP;FZD3;GSTM1;PHC1;HOMER1;EDEM1;PRRC2C;IRF2BP2;BBIP1;PHC3;PRDX6;PBX1;FOSL2;FAM135B;EHD3;AGO3;AGO4;AGO1;CDK14;SFXN5;EZH1;GSTM5;CDK16;LRSAM1;SMG1;SE…
NP3 Neural Progenitor Cell-Enriched Genes PMID30078729	HDSigDB 2021	DiestVMaleAccent1 (Diestrus vs Male, female high/KO upreg, male low/KO downreg)	343	3251	4.86458e-35	2.48832	8.6229e-37	206.633	CYFIP1;GMFB;AHCYL1;TRIO;PANK3;SPARC;TRRAP;ARAF;CCNC;ACTB;ALKBH5;PEG13;RNF114;DPYSL5;ZMIZ1;PPP2R1A;GPBP1;DPYSL3;CHORDC1;LUC7L;CIAO2A;SOX6;GLUL;ANK2;SOX11;ANK3;RC3H2;ATG12;WDR82;XRN2;SIK3;SET;MAGED1;MYCBP2;DCUN1D1;NOLC1;NEDD4L;BAZ2A;PIK3R1;MTMR4;SMIM7;GIGYF2;LARP1;MAP2;RAD21;DHX36;DPH3;MCMBP;MAP4;ARGLU1;SCAI;SRPK2;CREBBP;FZD3;GSTM1;PHC1;HOMER2;TIPARP;NCAPH2;INTS2;SMARCA5;PRRC2C;BBIP1;PUM1;PHC3;PBX1…
NP3 Neural Progenitor Cell-Enriched Genes PMID30078729	HDSigDB 2021	Union of DiestVMaleAccent3 and EstVMaleAccent3 (female low/KO downreg, male high/KO upreg)	343	3251	4.86458e-35	2.48832	8.6229e-37	206.633	CYFIP1;GMFB;AHCYL1;TRIO;PANK3;SPARC;TRRAP;ARAF;CCNC;ACTB;ALKBH5;PEG13;RNF114;DPYSL5;ZMIZ1;PPP2R1A;GPBP1;DPYSL3;CHORDC1;LUC7L;CIAO2A;SOX6;GLUL;ANK2;SOX11;ANK3;RC3H2;ATG12;WDR82;XRN2;SIK3;SET;MAGED1;MYCBP2;DCUN1D1;NOLC1;NEDD4L;BAZ2A;PIK3R1;MTMR4;SMIM7;GIGYF2;LARP1;MAP2;RAD21;DHX36;DPH3;MCMBP;MAP4;ARGLU1;SCAI;SRPK2;CREBBP;FZD3;GSTM1;PHC1;HOMER2;TIPARP;NCAPH2;INTS2;SMARCA5;PRRC2C;BBIP1;PUM1;PHC3;PBX1…
Genes Changed In Astrocytes Of HD Patients Vs Control PMID32681824	HDSigDB 2021	DiestVMaleAccent1 (Diestrus vs Male, female high/KO upreg, male low/KO downreg)	270	2282	1.21822e-34	2.72701	2.21208e-36	223.885	CYFIP2;NCKAP1;AHCYL1;SPARC;CCNC;ACTB;PREX2;ALKBH5;SCP2;ZMIZ1;DPYSL3;CHORDC1;PLCE1;SOX6;GLUL;CALN1;SOX5;MEF2C;RFX3;FRS2;PHKA1;MMD2;ANK2;ANK3;ASRGL1;MTURN;BCR;AR;PPP1R3C;XRN1;RUFY3;SIK3;RIN2;ALDH7A1;MTMR1;SDC4;MAOB;MAGED1;PDE1A;CEP85L;MYCBP2;DCUN1D1;NEDD4L;SLAIN2;TMTC1;PIK3R1;MED12L;SULT1A1;EPB41L5;LARP1;MAP2;PRKAR2A;DHX36;STXBP5;RIMKLB;ARGLU1;ZRANB3;CREBBP;PHC1;DTNA;NEBL;TIPARP;PRRC2C;PHC3;PBX1;DC…
Genes Changed In Astrocytes Of HD Patients Vs Control PMID32681824	HDSigDB 2021	Union of DiestVMaleAccent3 and EstVMaleAccent3 (female low/KO downreg, male high/KO upreg)	270	2282	1.21822e-34	2.72701	2.21208e-36	223.885	CYFIP2;NCKAP1;AHCYL1;SPARC;CCNC;ACTB;PREX2;ALKBH5;SCP2;ZMIZ1;DPYSL3;CHORDC1;PLCE1;SOX6;GLUL;CALN1;SOX5;MEF2C;RFX3;FRS2;PHKA1;MMD2;ANK2;ANK3;ASRGL1;MTURN;BCR;AR;PPP1R3C;XRN1;RUFY3;SIK3;RIN2;ALDH7A1;MTMR1;SDC4;MAOB;MAGED1;PDE1A;CEP85L;MYCBP2;DCUN1D1;NEDD4L;SLAIN2;TMTC1;PIK3R1;MED12L;SULT1A1;EPB41L5;LARP1;MAP2;PRKAR2A;DHX36;STXBP5;RIMKLB;ARGLU1;ZRANB3;CREBBP;PHC1;DTNA;NEBL;TIPARP;PRRC2C;PHC3;PBX1;DC…
Genes Changed In Pvalb/Th-expressing Interneurons Of HD Patients Vs Control PMID32681824	HDSigDB 2021	DiestVMaleAccent1 (Diestrus vs Male, female high/KO upreg, male low/KO downreg)	271	2313	4.8315e-34	2.69535	8.98203e-36	217.509	ITSN2;CYFIP1;TRIO;FRMPD4;NEXMIF;NUDT5;ACTB;PLCE1;LUC7L;SOX6;TBC1D22A;PKNOX2;CALN1;SOX5;MEF2A;UNC13C;MEF2C;RFX3;MMD2;ANK2;ANK3;RUFY3;PAPPA;XRN2;ZFPM2;MTMR1;TMEM87A;NECAB1;MAGED1;MYCBP2;TMTC1;MTMR4;GIGYF2;MED12L;SULT1A1;EPB41L5;MAP2;DHX36;STXBP5;RIMKLB;ARGLU1;SCAI;ZRANB3;PHC1;DTNA;HOMER1;EXOC6B;RAB27B;HSPA12A;TMEM196;PBX1;ST18;PUM2;CCDC88A;FAM135B;PEX5L;MYO5B;CDK12;PAM;SFXN5;CPEB4;SMG1;SETD2;CSRNP3…
Genes Changed In Pvalb/Th-expressing Interneurons Of HD Patients Vs Control PMID32681824	HDSigDB 2021	Union of DiestVMaleAccent3 and EstVMaleAccent3 (female low/KO downreg, male high/KO upreg)	271	2313	4.8315e-34	2.69535	8.98203e-36	217.509	ITSN2;CYFIP1;TRIO;FRMPD4;NEXMIF;NUDT5;ACTB;PLCE1;LUC7L;SOX6;TBC1D22A;PKNOX2;CALN1;SOX5;MEF2A;UNC13C;MEF2C;RFX3;MMD2;ANK2;ANK3;RUFY3;PAPPA;XRN2;ZFPM2;MTMR1;TMEM87A;NECAB1;MAGED1;MYCBP2;TMTC1;MTMR4;GIGYF2;MED12L;SULT1A1;EPB41L5;MAP2;DHX36;STXBP5;RIMKLB;ARGLU1;SCAI;ZRANB3;PHC1;DTNA;HOMER1;EXOC6B;RAB27B;HSPA12A;TMEM196;PBX1;ST18;PUM2;CCDC88A;FAM135B;PEX5L;MYO5B;CDK12;PAM;SFXN5;CPEB4;SMG1;SETD2;CSRNP3…
Genes Changed In Pvalb/Th-expressing Interneurons Of R6/2 Vs WT PMID32681824	HDSigDB 2021	DiestVMaleAccent1 (Diestrus vs Male, female high/KO upreg, male low/KO downreg)	142	824	1.65628e-33	3.95514	3.15072e-35	314.208	ANKRD13C;DGKG;RAB3C;TRIO;DGKD;UBE3C;FRMPD4;NEXMIF;ABAT;DOCK10;RIMS1;RIMS4;ZMIZ1;EP300;TNR;KPNA4;SOX6;PDE8B;PPFIA4;PKNOX2;CALN1;SOX5;MEF2A;PPP1R16B;RALGAPA1;MAGI2;RFX3;ANK2;RUFY3;DOK6;SIK3;PKP4;ZFPM2;CLOCK;XPR1;NECAB1;CUL5;STXBP4;KMT2C;MYCBP2;ANKRD12;LIN7A;PDS5B;GIGYF2;ATXN1;SNTG1;ZMAT4;DHX36;ABL2;SRGAP3;SCAI;KLHDC10;HSPA8;CREBBP;NEBL;IQSEC3;EXOC6B;PRRC2C;ARHGAP26;PHC3;PBX1;DCLK1;ST18;POU6F1;CNOT4…
Genes Changed In Pvalb/Th-expressing Interneurons Of R6/2 Vs WT PMID32681824	HDSigDB 2021	Union of DiestVMaleAccent3 and EstVMaleAccent3 (female low/KO downreg, male high/KO upreg)	142	824	1.65628e-33	3.95514	3.15072e-35	314.208	ANKRD13C;DGKG;RAB3C;TRIO;DGKD;UBE3C;FRMPD4;NEXMIF;ABAT;DOCK10;RIMS1;RIMS4;ZMIZ1;EP300;TNR;KPNA4;SOX6;PDE8B;PPFIA4;PKNOX2;CALN1;SOX5;MEF2A;PPP1R16B;RALGAPA1;MAGI2;RFX3;ANK2;RUFY3;DOK6;SIK3;PKP4;ZFPM2;CLOCK;XPR1;NECAB1;CUL5;STXBP4;KMT2C;MYCBP2;ANKRD12;LIN7A;PDS5B;GIGYF2;ATXN1;SNTG1;ZMAT4;DHX36;ABL2;SRGAP3;SCAI;KLHDC10;HSPA8;CREBBP;NEBL;IQSEC3;EXOC6B;PRRC2C;ARHGAP26;PHC3;PBX1;DCLK1;ST18;POU6F1;CNOT4…
Differentially Expressed Genes In Cerebellum Of 6 Mon HD Q140 Mice Vs Q20 GSE78270	HDSigDB 2021	DiestVMaleAccent1 (Diestrus vs Male, female high/KO upreg, male low/KO downreg)	289	2575	3.03373e-33	2.58651	5.9022e-35	203.856	ITSN2;CYFIP2;CYFIP1;NCKAP1;IPO11;PANK3;ZFYVE9;TRRAP;FRMPD4;KANTR;ALKBH8;PREX2;RPS6KA3;DPYSL5;ZMIZ1;PPP4R4;SOX6;CALN1;AGFG1;SOX5;MEF2A;UNC13C;PRKAB2;MEF2C;PRKCI;MRTFB;ANK2;ANK3;HPCAL4;THAP2;UHMK1;XRN1;TCEANC2;ATF7;HECA;KCTD12;ZFPM2;ATF6;CLOCK;NECAB1;MTMR9;NEDD4L;BAZ2A;TMTC1;NYAP2;GIGYF2;MED12L;TTBK2;LARP1;MAP2;PRKAR2A;RAD21;DHX36;RAB11FIP4;SCAI;GSTM3;CREBBP;GSTM1;DTNA;TIPARP;PRRC2C;GNG12;PRDX6;PBX…
Differentially Expressed Genes In Cerebellum Of 6 Mon HD Q140 Mice Vs Q20 GSE78270	HDSigDB 2021	Union of DiestVMaleAccent3 and EstVMaleAccent3 (female low/KO downreg, male high/KO upreg)	289	2575	3.03373e-33	2.58651	5.9022e-35	203.856	ITSN2;CYFIP2;CYFIP1;NCKAP1;IPO11;PANK3;ZFYVE9;TRRAP;FRMPD4;KANTR;ALKBH8;PREX2;RPS6KA3;DPYSL5;ZMIZ1;PPP4R4;SOX6;CALN1;AGFG1;SOX5;MEF2A;UNC13C;PRKAB2;MEF2C;PRKCI;MRTFB;ANK2;ANK3;HPCAL4;THAP2;UHMK1;XRN1;TCEANC2;ATF7;HECA;KCTD12;ZFPM2;ATF6;CLOCK;NECAB1;MTMR9;NEDD4L;BAZ2A;TMTC1;NYAP2;GIGYF2;MED12L;TTBK2;LARP1;MAP2;PRKAR2A;RAD21;DHX36;RAB11FIP4;SCAI;GSTM3;CREBBP;GSTM1;DTNA;TIPARP;PRRC2C;GNG12;PRDX6;PBX…
Genes Changed In Striatum Of R6/2 Vs WT Mice GSE109416	HDSigDB 2021	DiestVMaleAccent1 (Diestrus vs Male, female high/KO upreg, male low/KO downreg)	397	4107	4.61589e-33	2.30873	9.17989e-35	180.943	CYFIP2;NCKAP1;TRRAP;NEXMIF;ABAT;ALKBH8;PREX2;SYNGAP1;SCP2;PPP4R4;DPYSL3;MEF2A;MED1;UNC13C;PRKAB2;MEF2C;PRKCI;MRTFB;RFX3;HPCAL4;BCR;AR;RUFY3;ATF6;MTMR1;LXN;LYPD1;AGAP2;NEDD4L;IQGAP2;GIGYF2;LARP1;PRKAR2A;RAD21;MCMBP;CREBBP;FZD3;GSTM1;HOMER1;NEBL;HOMER2;TIPARP;NCAPH2;IRF2BP2;TMEM196;FOSL2;POU6F1;EHD3;SLC6A8;AGO4;AGO2;NMT1;FXYD6;PCDHB3;CDK12;CDK14;SFXN5;GSTM5;CPEB4;CDK16;PHF3;SETD2;NRSN1;SNX12;TFCP2L…
Genes Changed In Striatum Of R6/2 Vs WT Mice GSE109416	HDSigDB 2021	Union of DiestVMaleAccent3 and EstVMaleAccent3 (female low/KO downreg, male high/KO upreg)	397	4107	4.61589e-33	2.30873	9.17989e-35	180.943	CYFIP2;NCKAP1;TRRAP;NEXMIF;ABAT;ALKBH8;PREX2;SYNGAP1;SCP2;PPP4R4;DPYSL3;MEF2A;MED1;UNC13C;PRKAB2;MEF2C;PRKCI;MRTFB;RFX3;HPCAL4;BCR;AR;RUFY3;ATF6;MTMR1;LXN;LYPD1;AGAP2;NEDD4L;IQGAP2;GIGYF2;LARP1;PRKAR2A;RAD21;MCMBP;CREBBP;FZD3;GSTM1;HOMER1;NEBL;HOMER2;TIPARP;NCAPH2;IRF2BP2;TMEM196;FOSL2;POU6F1;EHD3;SLC6A8;AGO4;AGO2;NMT1;FXYD6;PCDHB3;CDK12;CDK14;SFXN5;GSTM5;CPEB4;CDK16;PHF3;SETD2;NRSN1;SNX12;TFCP2L…
Insoluble Brain Proteome Of WT And HD R6/2 Mice PMID29166617	HDSigDB 2021	DiestVMaleAccent1 (Diestrus vs Male, female high/KO upreg, male low/KO downreg)	191	1386	6.0209e-32	3.10954	1.22344e-33	235.652	ITSN2;CYFIP2;CYFIP1;NCKAP1;AHCYL1;TRIO;FRMPD4;CSE1L;CTNND2;OGDHL;DOCK10;RIMS1;SYNGAP1;DPYSL5;PPP2R1A;PPP4R4;DPYSL3;OSBP;PPFIA1;LUC7L;GLUL;AGFG1;NSF;UNC13C;AP1B1;ANK2;ANK3;LARP4B;IPCEF1;BCR;STX1B;ILF3;ARMCX2;XRN1;EEF1A2;GPD1;SIK3;ELMO2;PKP4;RELCH;JCAD;KMT2A;CUL5;MYCBP2;SLC1A2;AGAP2;NOLC1;PDS5B;NDRG2;PDS5A;MACROH2A1;CAMSAP2;LARP1;KIF3B;MAP2;G3BP2;ABL2;STXBP5;SRGAP3;TPPP;MAP4;ARGLU1;SCAI;SRPK2;SPECC…
Insoluble Brain Proteome Of WT And HD R6/2 Mice PMID29166617	HDSigDB 2021	Union of DiestVMaleAccent3 and EstVMaleAccent3 (female low/KO downreg, male high/KO upreg)	191	1386	6.0209e-32	3.10954	1.22344e-33	235.652	ITSN2;CYFIP2;CYFIP1;NCKAP1;AHCYL1;TRIO;FRMPD4;CSE1L;CTNND2;OGDHL;DOCK10;RIMS1;SYNGAP1;DPYSL5;PPP2R1A;PPP4R4;DPYSL3;OSBP;PPFIA1;LUC7L;GLUL;AGFG1;NSF;UNC13C;AP1B1;ANK2;ANK3;LARP4B;IPCEF1;BCR;STX1B;ILF3;ARMCX2;XRN1;EEF1A2;GPD1;SIK3;ELMO2;PKP4;RELCH;JCAD;KMT2A;CUL5;MYCBP2;SLC1A2;AGAP2;NOLC1;PDS5B;NDRG2;PDS5A;MACROH2A1;CAMSAP2;LARP1;KIF3B;MAP2;G3BP2;ABL2;STXBP5;SRGAP3;TPPP;MAP4;ARGLU1;SCAI;SRPK2;SPECC…
Genes Up-Regulated In iSPNs Of 9 Wks R6/2 Vs WT PMID32681824	HDSigDB 2021	DiestVMaleAccent1 (Diestrus vs Male, female high/KO upreg, male low/KO downreg)	302	2797	7.17318e-32	2.48507	1.4886e-33	187.84	CYFIP1;TRIO;PANK3;SPARC;NEXMIF;MSANTD4;ALKBH8;UBE2L3;PREX2;ZMIZ1;PPP2R1A;DPYSL3;LUC7L;SOX6;GLUL;AGFG1;FRS2;ANK2;SOX11;ASRGL1;THAP2;MTURN;UHMK1;MOSMO;SNHG14;PPP1R3C;XRN1;RUFY3;TCEANC2;SUCLG2;ATF7;MTMR1;LXN;MAOB;EPAS1;MAGED1;PDE1A;CEP85L;MYCBP2;BAZ2A;SLAIN2;PIK3R1;PLA2G6;GIGYF2;TTBK2;EPB41L5;LARP1;PRKAR2A;RAD21;STXBP5;MAP4;RIMKLB;PCK2;CREBBP;GSTM1;EDEM1;INTS2;IQSEC3;EXOC6B;SMARCA5;PRRC2C;HSPA12A;PU…
Genes Up-Regulated In iSPNs Of 9 Wks R6/2 Vs WT PMID32681824	HDSigDB 2021	Union of DiestVMaleAccent3 and EstVMaleAccent3 (female low/KO downreg, male high/KO upreg)	302	2797	7.17318e-32	2.48507	1.4886e-33	187.84	CYFIP1;TRIO;PANK3;SPARC;NEXMIF;MSANTD4;ALKBH8;UBE2L3;PREX2;ZMIZ1;PPP2R1A;DPYSL3;LUC7L;SOX6;GLUL;AGFG1;FRS2;ANK2;SOX11;ASRGL1;THAP2;MTURN;UHMK1;MOSMO;SNHG14;PPP1R3C;XRN1;RUFY3;TCEANC2;SUCLG2;ATF7;MTMR1;LXN;MAOB;EPAS1;MAGED1;PDE1A;CEP85L;MYCBP2;BAZ2A;SLAIN2;PIK3R1;PLA2G6;GIGYF2;TTBK2;EPB41L5;LARP1;PRKAR2A;RAD21;STXBP5;MAP4;RIMKLB;PCK2;CREBBP;GSTM1;EDEM1;INTS2;IQSEC3;EXOC6B;SMARCA5;PRRC2C;HSPA12A;PU…
Genes Down-Regulated In HD Grade 3 Markers In Human Frontal Lobe BA4 (HG-U133A) GSE3790	HDSigDB 2021	DiestVMaleAccent1 (Diestrus vs Male, female high/KO upreg, male low/KO downreg)	86	355	9.05313e-31	5.86804	1.91787e-32	428.552	GSK3B;CSRNP3;HIP1;PLEKHB2;ZFYVE9;PRDM2;SMG7;LYST;ARHGAP35;UBE2L3;YY1;TRIM2;NCS1;KIF5A;PSD3;IDS;SLC16A7;CEP170;ARIH1;TNPO1;SOX5;MEF2A;MEF2C;PRKCI;PEG3;EIF1AX;NCOA3;ZFR;TMOD2;DYRK1A;ANK3;ASH1L;LARP4B;KCNAB2;ATG12;RNF41;PTP4A2;ILF3;ZEB1;CREB1;SIK3;RAPGEF5;B4GALT6;MAPRE2;GAS7;CUL5;ROCK2;USP10;ABHD2;USO1;PIK3R1;TRAK2;CAMSAP2;GNA13;BCLAF1;MAPK8;ATXN1;RAD21;MAP4;EIF4B;KLHDC10;RANBP2;ARFGEF1;TCAF1;UBE2H;…
Genes Down-Regulated In HD Grade 3 Markers In Human Frontal Lobe BA4 (HG-U133A) GSE3790	HDSigDB 2021	Union of DiestVMaleAccent3 and EstVMaleAccent3 (female low/KO downreg, male high/KO upreg)	86	355	9.05313e-31	5.86804	1.91787e-32	428.552	GSK3B;CSRNP3;HIP1;PLEKHB2;ZFYVE9;PRDM2;SMG7;LYST;ARHGAP35;UBE2L3;YY1;TRIM2;NCS1;KIF5A;PSD3;IDS;SLC16A7;CEP170;ARIH1;TNPO1;SOX5;MEF2A;MEF2C;PRKCI;PEG3;EIF1AX;NCOA3;ZFR;TMOD2;DYRK1A;ANK3;ASH1L;LARP4B;KCNAB2;ATG12;RNF41;PTP4A2;ILF3;ZEB1;CREB1;SIK3;RAPGEF5;B4GALT6;MAPRE2;GAS7;CUL5;ROCK2;USP10;ABHD2;USO1;PIK3R1;TRAK2;CAMSAP2;GNA13;BCLAF1;MAPK8;ATXN1;RAD21;MAP4;EIF4B;KLHDC10;RANBP2;ARFGEF1;TCAF1;UBE2H;…
Genes Changed In Ciliated Ependymal Cells Of HD Patients Vs Control PMID32681824	HDSigDB 2021	DiestVMaleAccent1 (Diestrus vs Male, female high/KO upreg, male low/KO downreg)	299	2798	1.11751e-30	2.44666	2.41572e-32	178.119	CYFIP1;CHIC1;TRIO;SPARC;PLEKHB2;ZFYVE9;TRRAP;FRMPD4;NEXMIF;WIPF2;CCNC;ABAT;IKZF2;ACTB;PREX2;RPS6KA3;ALKBH5;SYNGAP1;SCP2;ZMIZ1;GPBP1;DPYSL3;PLCE1;LUC7L;SOX6;TBC1D22A;PKNOX2;SOX5;MEF2C;AP1B1;RFX3;ANK2;ANK3;BCR;MOSMO;SIK3;TCEANC2;SUCLG2;RIN2;MTMR1;STXBP4;PDE1A;MYCBP2;NEDD4L;BAZ2A;PLA2G6;IQGAP2;GIGYF2;MED12L;TTBK2;LARP1;MAP2;PRKAR2A;DHX36;STXBP5;MAP4;RIMKLB;ARGLU1;ZRANB3;SRPK2;CREBBP;FZD3;PHC1;DTNA;N…
Genes Changed In Ciliated Ependymal Cells Of HD Patients Vs Control PMID32681824	HDSigDB 2021	Union of DiestVMaleAccent3 and EstVMaleAccent3 (female low/KO downreg, male high/KO upreg)	299	2798	1.11751e-30	2.44666	2.41572e-32	178.119	CYFIP1;CHIC1;TRIO;SPARC;PLEKHB2;ZFYVE9;TRRAP;FRMPD4;NEXMIF;WIPF2;CCNC;ABAT;IKZF2;ACTB;PREX2;RPS6KA3;ALKBH5;SYNGAP1;SCP2;ZMIZ1;GPBP1;DPYSL3;PLCE1;LUC7L;SOX6;TBC1D22A;PKNOX2;SOX5;MEF2C;AP1B1;RFX3;ANK2;ANK3;BCR;MOSMO;SIK3;TCEANC2;SUCLG2;RIN2;MTMR1;STXBP4;PDE1A;MYCBP2;NEDD4L;BAZ2A;PLA2G6;IQGAP2;GIGYF2;MED12L;TTBK2;LARP1;MAP2;PRKAR2A;DHX36;STXBP5;MAP4;RIMKLB;ARGLU1;ZRANB3;SRPK2;CREBBP;FZD3;PHC1;DTNA;N…
The Global Proteome Data Of The Insoluble Fraction From The Brains Of Q175 And WT Mice PMID31138642	HDSigDB 2021	DiestVMaleAccent1 (Diestrus vs Male, female high/KO upreg, male low/KO downreg)	234	1951	2.4678e-30	2.70085	5.44132e-32	194.431	ITSN2;CYFIP2;CYFIP1;NCKAP1;GMFB;AHCYL1;TRIO;ABAT;UBE2L3;SYNGAP1;SCP2;DPYSL5;PPP2R1A;DPYSL3;LUC7L;GLUL;AP1B1;ANK2;ANK3;HPCAL4;ASRGL1;BCR;STX1B;RUFY3;SIK3;SUCLG2;RELCH;KCTD12;ALDH7A1;SET;SDC4;MAOB;PDE1A;AGAP2;NEDD4L;LARP1;MAP2;PRKAR2A;DHX36;STXBP5;MAP4;SCAI;GSTM3;GSTM1;HOMER1;NEBL;HOMER2;IQSEC3;EXOC6B;RAB27B;HSPA12A;GNG12;PRDX6;ACADSB;DCLK1;PEX5L;EHD3;NMT1;FXYD6;SFXN5;GSTM5;PYGB;TOP2B;CLTC;SNX12;AD…
The Global Proteome Data Of The Insoluble Fraction From The Brains Of Q175 And WT Mice PMID31138642	HDSigDB 2021	Union of DiestVMaleAccent3 and EstVMaleAccent3 (female low/KO downreg, male high/KO upreg)	234	1951	2.4678e-30	2.70085	5.44132e-32	194.431	ITSN2;CYFIP2;CYFIP1;NCKAP1;GMFB;AHCYL1;TRIO;ABAT;UBE2L3;SYNGAP1;SCP2;DPYSL5;PPP2R1A;DPYSL3;LUC7L;GLUL;AP1B1;ANK2;ANK3;HPCAL4;ASRGL1;BCR;STX1B;RUFY3;SIK3;SUCLG2;RELCH;KCTD12;ALDH7A1;SET;SDC4;MAOB;PDE1A;AGAP2;NEDD4L;LARP1;MAP2;PRKAR2A;DHX36;STXBP5;MAP4;SCAI;GSTM3;GSTM1;HOMER1;NEBL;HOMER2;IQSEC3;EXOC6B;RAB27B;HSPA12A;GNG12;PRDX6;ACADSB;DCLK1;PEX5L;EHD3;NMT1;FXYD6;SFXN5;GSTM5;PYGB;TOP2B;CLTC;SNX12;AD…
Genes Changed In iSPNs Of R6/2 Vs WT PMID32681824	HDSigDB 2021	DiestVMaleAccent1 (Diestrus vs Male, female high/KO upreg, male low/KO downreg)	146	923	2.53422e-30	3.56562	5.69734e-32	256.52	CYFIP2;DGKG;NCKAP1;FRMPD4;DGKB;UBE3A;ABAT;DCAF6;SESN3;PPP4R4;SCMH1;EP300;TNR;PDE8B;CALN1;PPP1R16B;NSF;UNC13C;PRKCI;RALGAPA1;MAGI2;ANK2;ANK3;BCR;RUFY3;DOK6;SIK3;ATF6;JCAD;NECAB1;ABHD2;PDE1A;ANKRD12;NEDD4L;LIN7A;IQGAP2;NYAP2;GIGYF2;ATXN1;FUT9;SNTG1;MAP2;ZMAT4;LRRC4C;ARGLU1;KLHDC10;RAP1GAP2;HSPA8;CREBBP;HOMER1;NEBL;EXOC6B;PRRC2C;ARHGAP26;PBX1;DCLK1;ARHGAP33;CCDC88A;ARHGAP32;FAM135B;DIAPH2;GNAL;PAN3;…
Genes Changed In iSPNs Of R6/2 Vs WT PMID32681824	HDSigDB 2021	Union of DiestVMaleAccent3 and EstVMaleAccent3 (female low/KO downreg, male high/KO upreg)	146	923	2.53422e-30	3.56562	5.69734e-32	256.52	CYFIP2;DGKG;NCKAP1;FRMPD4;DGKB;UBE3A;ABAT;DCAF6;SESN3;PPP4R4;SCMH1;EP300;TNR;PDE8B;CALN1;PPP1R16B;NSF;UNC13C;PRKCI;RALGAPA1;MAGI2;ANK2;ANK3;BCR;RUFY3;DOK6;SIK3;ATF6;JCAD;NECAB1;ABHD2;PDE1A;ANKRD12;NEDD4L;LIN7A;IQGAP2;NYAP2;GIGYF2;ATXN1;FUT9;SNTG1;MAP2;ZMAT4;LRRC4C;ARGLU1;KLHDC10;RAP1GAP2;HSPA8;CREBBP;HOMER1;NEBL;EXOC6B;PRRC2C;ARHGAP26;PBX1;DCLK1;ARHGAP33;CCDC88A;ARHGAP32;FAM135B;DIAPH2;GNAL;PAN3;…
Genes Down-Regulated In dSPNs Of HD Patients Vs Control PMID32681824	HDSigDB 2021	DiestVMaleAccent1 (Diestrus vs Male, female high/KO upreg, male low/KO downreg)	307	2936	6.20296e-30	2.39285	1.42134e-31	169.96	ITSN2;CYFIP2;CYFIP1;NCKAP1;TRIO;PANK3;ZFYVE9;TRRAP;NEXMIF;CCNC;ABAT;NUDT5;ACTB;ALKBH8;DCAF6;RPS6KA3;RNF114;SCP2;DPYSL5;PPP4R4;GPBP1;CDK5RAP1;TBC1D22A;MEF2A;UNC13C;FRS2;ATG12;BCR;XRN1;RUFY3;SIK3;ZFPM2;ATF6;RIN2;CLOCK;MTMR1;TMEM87A;NECAB1;MAOB;MAGED1;CEP85L;MYCBP2;NEDD4L;MTMR4;MED12L;SULT1A1;EPB41L5;DHX36;STXBP5;RIMKLB;ARGLU1;RAB11FIP4;ZRANB3;FZD3;PHC1;HOMER1;EXOC6B;SMARCA5;PRRC2C;BBIP1;PHC3;TMEM19…
Genes Down-Regulated In dSPNs Of HD Patients Vs Control PMID32681824	HDSigDB 2021	Union of DiestVMaleAccent3 and EstVMaleAccent3 (female low/KO downreg, male high/KO upreg)	307	2936	6.20296e-30	2.39285	1.42134e-31	169.96	ITSN2;CYFIP2;CYFIP1;NCKAP1;TRIO;PANK3;ZFYVE9;TRRAP;NEXMIF;CCNC;ABAT;NUDT5;ACTB;ALKBH8;DCAF6;RPS6KA3;RNF114;SCP2;DPYSL5;PPP4R4;GPBP1;CDK5RAP1;TBC1D22A;MEF2A;UNC13C;FRS2;ATG12;BCR;XRN1;RUFY3;SIK3;ZFPM2;ATF6;RIN2;CLOCK;MTMR1;TMEM87A;NECAB1;MAOB;MAGED1;CEP85L;MYCBP2;NEDD4L;MTMR4;MED12L;SULT1A1;EPB41L5;DHX36;STXBP5;RIMKLB;ARGLU1;RAB11FIP4;ZRANB3;FZD3;PHC1;HOMER1;EXOC6B;SMARCA5;PRRC2C;BBIP1;PHC3;TMEM19…
Genes Up-Regulated In Foxp2/Olfm3-expressing Neurons Of HD Patients Vs Control PMID32681824	HDSigDB 2021	DiestVMaleAccent1 (Diestrus vs Male, female high/KO upreg, male low/KO downreg)	215	1738	1.73541e-29	2.76856	4.05153e-31	193.747	ITSN2;CYFIP2;CYFIP1;PANK3;FRMPD4;NEXMIF;PREX2;RPS6KA3;ZMIZ1;DPYSL3;CHORDC1;PLCE1;SOX6;PKNOX2;SOX5;UNC13C;MEF2C;ANK2;HPCAL4;ASRGL1;MTURN;WDR82;KCTD12;RIN2;ALDH7A1;PDE1A;CEP85L;MYCBP2;IQGAP2;GIGYF2;TTBK2;EPB41L5;LARP1;MAP2;PRKAR2A;RAD21;MAP4;ARGLU1;SRPK2;DTNA;NEBL;HOMER2;IRF2BP2;RAB27B;GNG12;TMEM196;ST18;MED13L;CCDC88A;PEX5L;MYO5B;CDK12;CDK14;EZH1;LRSAM1;BTG1;HIP1;FMN2;ARHGAP5;SH3RF1;PIP4P2;MED13;T…
Genes Up-Regulated In Foxp2/Olfm3-expressing Neurons Of HD Patients Vs Control PMID32681824	HDSigDB 2021	Union of DiestVMaleAccent3 and EstVMaleAccent3 (female low/KO downreg, male high/KO upreg)	215	1738	1.73541e-29	2.76856	4.05153e-31	193.747	ITSN2;CYFIP2;CYFIP1;PANK3;FRMPD4;NEXMIF;PREX2;RPS6KA3;ZMIZ1;DPYSL3;CHORDC1;PLCE1;SOX6;PKNOX2;SOX5;UNC13C;MEF2C;ANK2;HPCAL4;ASRGL1;MTURN;WDR82;KCTD12;RIN2;ALDH7A1;PDE1A;CEP85L;MYCBP2;IQGAP2;GIGYF2;TTBK2;EPB41L5;LARP1;MAP2;PRKAR2A;RAD21;MAP4;ARGLU1;SRPK2;DTNA;NEBL;HOMER2;IRF2BP2;RAB27B;GNG12;TMEM196;ST18;MED13L;CCDC88A;PEX5L;MYO5B;CDK12;CDK14;EZH1;LRSAM1;BTG1;HIP1;FMN2;ARHGAP5;SH3RF1;PIP4P2;MED13;T…
Postsynaptic Density Proteins PMID21170055	HDSigDB 2021	DiestVMaleAccent1 (Diestrus vs Male, female high/KO upreg, male low/KO downreg)	191	1458	4.61398e-29	2.9209	1.09714e-30	201.498	ITSN2;CYFIP2;CYFIP1;RAB3C;NCKAP1;ALDH1L1;AHCYL1;TRIO;UBE3C;DGKB;CSE1L;CTNND2;WIPF2;FAM107A;OGDHL;IPO7;ACTB;ARHGAP35;IPO5;DOCK10;RIMS1;SLK;SYNGAP1;PPP2R1A;DPYSL3;KIF5A;PPFIA1;TNR;PPFIA4;GLUL;FAM81A;KPNA1;NSF;RALGAPA1;VPS33A;TMOD2;MAGI2;AP1B1;ANK2;ANK3;BCR;STX1B;RUFY3;EEF1A2;TBC1D24;UBE2V2;ELMO2;PKP4;RELCH;KCTD12;ALDH7A1;ATP6V1A;MAOB;PDE1A;MYCBP2;SLC1A2;AGAP2;LIN7A;RASAL2;NDRG2;GOLGA7B;MAP2;PRKAR2A…
Postsynaptic Density Proteins PMID21170055	HDSigDB 2021	Union of DiestVMaleAccent3 and EstVMaleAccent3 (female low/KO downreg, male high/KO upreg)	191	1458	4.61398e-29	2.9209	1.09714e-30	201.498	ITSN2;CYFIP2;CYFIP1;RAB3C;NCKAP1;ALDH1L1;AHCYL1;TRIO;UBE3C;DGKB;CSE1L;CTNND2;WIPF2;FAM107A;OGDHL;IPO7;ACTB;ARHGAP35;IPO5;DOCK10;RIMS1;SLK;SYNGAP1;PPP2R1A;DPYSL3;KIF5A;PPFIA1;TNR;PPFIA4;GLUL;FAM81A;KPNA1;NSF;RALGAPA1;VPS33A;TMOD2;MAGI2;AP1B1;ANK2;ANK3;BCR;STX1B;RUFY3;EEF1A2;TBC1D24;UBE2V2;ELMO2;PKP4;RELCH;KCTD12;ALDH7A1;ATP6V1A;MAOB;PDE1A;MYCBP2;SLC1A2;AGAP2;LIN7A;RASAL2;NDRG2;GOLGA7B;MAP2;PRKAR2A…
Genes Changed In dSPNs Of 9 Wks R6/2 Vs WT PMID32681824	HDSigDB 2021	DiestVMaleAccent1 (Diestrus vs Male, female high/KO upreg, male low/KO downreg)	440	4943	4.82546e-29	2.1281	1.16829e-30	146.673	CYFIP2;CYFIP1;NCKAP1;TRIO;FRMPD4;NEXMIF;WIPF2;MSANTD4;ALKBH8;DCAF6;SYNGAP1;RNF114;PPP4R4;DPYSL3;LUC7L;UNC13C;PRKCI;RFX3;FRS2;SOX11;HPCAL4;RC3H2;ATG12;BCR;RUFY3;ATF6;MTMR1;MEAF6;LYPD1;AGAP2;NEDD4L;BAZ2A;SLAIN2;IQGAP2;GIGYF2;LARP1;PRKAR2A;RAD21;MCMBP;CREBBP;FZD3;GSTM1;HOMER1;NEBL;EXOC6B;PRRC2C;PHC3;PBX1;EHD3;SLC6A8;LAS1L;AGO3;AGO4;NMT1;CDK12;CDK14;EZH1;GSTM5;CDK16;PHF3;PYGB;SETD2;CDKN1B;TGFB1I1;SET…
Genes Changed In dSPNs Of 9 Wks R6/2 Vs WT PMID32681824	HDSigDB 2021	Union of DiestVMaleAccent3 and EstVMaleAccent3 (female low/KO downreg, male high/KO upreg)	440	4943	4.82546e-29	2.1281	1.16829e-30	146.673	CYFIP2;CYFIP1;NCKAP1;TRIO;FRMPD4;NEXMIF;WIPF2;MSANTD4;ALKBH8;DCAF6;SYNGAP1;RNF114;PPP4R4;DPYSL3;LUC7L;UNC13C;PRKCI;RFX3;FRS2;SOX11;HPCAL4;RC3H2;ATG12;BCR;RUFY3;ATF6;MTMR1;MEAF6;LYPD1;AGAP2;NEDD4L;BAZ2A;SLAIN2;IQGAP2;GIGYF2;LARP1;PRKAR2A;RAD21;MCMBP;CREBBP;FZD3;GSTM1;HOMER1;NEBL;EXOC6B;PRRC2C;PHC3;PBX1;EHD3;SLC6A8;LAS1L;AGO3;AGO4;NMT1;CDK12;CDK14;EZH1;GSTM5;CDK16;PHF3;PYGB;SETD2;CDKN1B;TGFB1I1;SET…
Genes Down-Regulated In Astrocytes Of HD Patients Vs Control PMID32681824	HDSigDB 2021	DiestVMaleAccent1 (Diestrus vs Male, female high/KO upreg, male low/KO downreg)	199	1557	5.79137e-29	2.84971	1.42719e-30	195.838	CYFIP2;NCKAP1;AHCYL1;CCNC;ACTB;PREX2;SCP2;SOX6;GLUL;CALN1;SOX5;MEF2C;FRS2;PHKA1;MMD2;ASRGL1;PPP1R3C;XRN1;RUFY3;SIK3;ALDH7A1;MTMR1;SDC4;MAGED1;CEP85L;MYCBP2;DCUN1D1;SLAIN2;PIK3R1;MED12L;SULT1A1;EPB41L5;MAP2;DHX36;STXBP5;RIMKLB;ARGLU1;ZRANB3;PHC1;DTNA;TIPARP;PHC3;PBX1;CCDC88A;RGL1;SFXN5;CPEB4;SMG1;AHCTF1;NRSN1;CLTC;ADK;RSF1;ARHGAP5;OSBPL11;SH3RF1;NIPBL;NHSL1;XPO1;REV3L;IDS;ACADM;SPTAN1;LIN52;PCMTD1…
Genes Down-Regulated In Astrocytes Of HD Patients Vs Control PMID32681824	HDSigDB 2021	Union of DiestVMaleAccent3 and EstVMaleAccent3 (female low/KO downreg, male high/KO upreg)	199	1557	5.79137e-29	2.84971	1.42719e-30	195.838	CYFIP2;NCKAP1;AHCYL1;CCNC;ACTB;PREX2;SCP2;SOX6;GLUL;CALN1;SOX5;MEF2C;FRS2;PHKA1;MMD2;ASRGL1;PPP1R3C;XRN1;RUFY3;SIK3;ALDH7A1;MTMR1;SDC4;MAGED1;CEP85L;MYCBP2;DCUN1D1;SLAIN2;PIK3R1;MED12L;SULT1A1;EPB41L5;MAP2;DHX36;STXBP5;RIMKLB;ARGLU1;ZRANB3;PHC1;DTNA;TIPARP;PHC3;PBX1;CCDC88A;RGL1;SFXN5;CPEB4;SMG1;AHCTF1;NRSN1;CLTC;ADK;RSF1;ARHGAP5;OSBPL11;SH3RF1;NIPBL;NHSL1;XPO1;REV3L;IDS;ACADM;SPTAN1;LIN52;PCMTD1…
Genes Changed In iSPNs Of 6 Mon HdhQ170 Vs HdhQ20 PMID32681824	HDSigDB 2021	DiestVMaleAccent1 (Diestrus vs Male, female high/KO upreg, male low/KO downreg)	342	3492	1.87043e-28	2.25282	4.69022e-30	152.138	ITSN2;CYFIP2;NCKAP1;CHIC1;AHCYL1;PANK3;SPARC;WIPF2;ARAF;IKZF2;DCAF6;SYNGAP1;PPP2R1A;PPP4R4;DPYSL3;CHORDC1;GLUL;CALN1;PRKAB2;PRKCI;OXSM;MRTFB;FRS2;PHKA1;SOX11;HPCAL4;THAP2;ATG12;UHMK1;BCR;SNHG14;PPP1R3C;XRN1;RUFY3;SIK3;ATF7;ATF6;NECAB1;MAOB;EPAS1;PDE1A;MYCBP2;AGAP2;NOLC1;NEDD4L;PIK3R1;MTMR4;IQGAP2;LARP1;MAP2;PRKAR2A;RAD21;DHX36;SRPK2;GSTM1;EGR3;HOMER1;NEBL;HOMER2;TIPARP;EDEM1;INTS2;EXOC6B;IRF2BP2;…
Genes Changed In iSPNs Of 6 Mon HdhQ170 Vs HdhQ20 PMID32681824	HDSigDB 2021	Union of DiestVMaleAccent3 and EstVMaleAccent3 (female low/KO downreg, male high/KO upreg)	342	3492	1.87043e-28	2.25282	4.69022e-30	152.138	ITSN2;CYFIP2;NCKAP1;CHIC1;AHCYL1;PANK3;SPARC;WIPF2;ARAF;IKZF2;DCAF6;SYNGAP1;PPP2R1A;PPP4R4;DPYSL3;CHORDC1;GLUL;CALN1;PRKAB2;PRKCI;OXSM;MRTFB;FRS2;PHKA1;SOX11;HPCAL4;THAP2;ATG12;UHMK1;BCR;SNHG14;PPP1R3C;XRN1;RUFY3;SIK3;ATF7;ATF6;NECAB1;MAOB;EPAS1;PDE1A;MYCBP2;AGAP2;NOLC1;NEDD4L;PIK3R1;MTMR4;IQGAP2;LARP1;MAP2;PRKAR2A;RAD21;DHX36;SRPK2;GSTM1;EGR3;HOMER1;NEBL;HOMER2;TIPARP;EDEM1;INTS2;EXOC6B;IRF2BP2;…
COP Committed Oligodendrocyte Precursor Cell-Enriched Genes PMID30078729	HDSigDB 2021	DiestVMaleAccent1 (Diestrus vs Male, female high/KO upreg, male low/KO downreg)	317	3153	5.75223e-28	2.29015	1.48169e-29	152.024	CYFIP2;CYFIP1;NCKAP1;GMFB;AHCYL1;TRIO;PANK3;SPARC;TRRAP;ARAF;ABAT;ACTB;ZMIZ1;PPP2R1A;GPBP1;DPYSL3;CHORDC1;LUC7L;CIAO2A;SOX6;GLUL;AGFG1;SOX5;MMD2;ANK2;SOX11;ANK3;RC3H2;ASRGL1;SNHG14;WDR82;XRN2;ATF6;RIN2;TMEM87A;SET;MAGED1;MYCBP2;DCUN1D1;NOLC1;PIK3R1;SMIM7;GIGYF2;LARP1;MAP2;RAD21;DHX36;DPH3;ARGLU1;SRPK2;CREBBP;FZD3;GSTM1;HOMER2;TIPARP;NCAPH2;SMARCA5;PRRC2C;BBIP1;PUM1;GNG12;ACADSB;DCLK1;MED13L;PUM2;…
Genes Up-Regulated In Astrocytes Of HdhQ170 Vs HdhQ20 PMID32681824	HDSigDB 2021	DiestVMaleAccent1 (Diestrus vs Male, female high/KO upreg, male low/KO downreg)	101	518	5.75223e-28	4.47646	1.49215e-29	297.124	CYFIP2;DGKG;RAB3C;TRIO;TRRAP;GDA;NEXMIF;DOCK10;RIMS1;KIF5A;TNR;RGS8;MEF2A;NSF;MEF2C;RALGAPA1;LMO3;MAGI2;MRTFB;HPCAL4;STX1B;XRN1;RUFY3;EEF1A2;SMS;PKP4;RELCH;NECAB1;INO80D;PDE1A;MYCBP2;LIN7A;PDS5B;NYAP2;DNAJC27;PLCXD2;GIGYF2;SNTG1;UBR5;TASOR;TPPP;SKIL;ZKSCAN1;TCAF1;HSPA12A;PUM1;ARHGAP26;TMEM196;PUM2;PEX5L;DLG2;GNAL;NBEA;NF1;SMG1;CSRNP3;DDX3X;CLTC;RASGRF1;USP34;ELAVL4;RSF1;LDB2;AFF4;TRIM2;PSD3;REV3L…
COP Committed Oligodendrocyte Precursor Cell-Enriched Genes PMID30078729	HDSigDB 2021	Union of DiestVMaleAccent3 and EstVMaleAccent3 (female low/KO downreg, male high/KO upreg)	317	3153	5.75223e-28	2.29015	1.48169e-29	152.024	CYFIP2;CYFIP1;NCKAP1;GMFB;AHCYL1;TRIO;PANK3;SPARC;TRRAP;ARAF;ABAT;ACTB;ZMIZ1;PPP2R1A;GPBP1;DPYSL3;CHORDC1;LUC7L;CIAO2A;SOX6;GLUL;AGFG1;SOX5;MMD2;ANK2;SOX11;ANK3;RC3H2;ASRGL1;SNHG14;WDR82;XRN2;ATF6;RIN2;TMEM87A;SET;MAGED1;MYCBP2;DCUN1D1;NOLC1;PIK3R1;SMIM7;GIGYF2;LARP1;MAP2;RAD21;DHX36;DPH3;ARGLU1;SRPK2;CREBBP;FZD3;GSTM1;HOMER2;TIPARP;NCAPH2;SMARCA5;PRRC2C;BBIP1;PUM1;GNG12;ACADSB;DCLK1;MED13L;PUM2;…
Genes Up-Regulated In Astrocytes Of HdhQ170 Vs HdhQ20 PMID32681824	HDSigDB 2021	Union of DiestVMaleAccent3 and EstVMaleAccent3 (female low/KO downreg, male high/KO upreg)	101	518	5.75223e-28	4.47646	1.49215e-29	297.124	CYFIP2;DGKG;RAB3C;TRIO;TRRAP;GDA;NEXMIF;DOCK10;RIMS1;KIF5A;TNR;RGS8;MEF2A;NSF;MEF2C;RALGAPA1;LMO3;MAGI2;MRTFB;HPCAL4;STX1B;XRN1;RUFY3;EEF1A2;SMS;PKP4;RELCH;NECAB1;INO80D;PDE1A;MYCBP2;LIN7A;PDS5B;NYAP2;DNAJC27;PLCXD2;GIGYF2;SNTG1;UBR5;TASOR;TPPP;SKIL;ZKSCAN1;TCAF1;HSPA12A;PUM1;ARHGAP26;TMEM196;PUM2;PEX5L;DLG2;GNAL;NBEA;NF1;SMG1;CSRNP3;DDX3X;CLTC;RASGRF1;USP34;ELAVL4;RSF1;LDB2;AFF4;TRIM2;PSD3;REV3L…
Genes Up-Regulated In Expression In Normal Human Brain Vs Other Fetal Tissues GSE65399	HDSigDB 2021	DiestVMaleAccent1 (Diestrus vs Male, female high/KO upreg, male low/KO downreg)	299	2903	7.00856e-28	2.33298	1.84835e-29	154.351	CYFIP2;NCKAP1;GMFB;TRIO;PANK3;PLEKHB2;FRMPD4;NEXMIF;ABAT;MSANTD4;UBE2L3;ZMIZ1;PPP2R1A;DPYSL3;LUC7L;PKNOX2;CALN1;AGFG1;SOX5;UNC13C;MEF2C;ANK2;SOX11;ANK3;HPCAL4;ASRGL1;THAP2;MTURN;STX1B;WDR82;RUFY3;RELCH;KCTD12;NECAB1;SET;MEAF6;PDE1A;MYCBP2;LYPD1;AGAP2;MTMR9;NEDD4L;SLAIN2;PIK3R1;MTMR4;MAP2;RAD21;STXBP5;MAP4;RIMKLB;RAB11FIP4;SRPK2;GSTM3;FZD3;DTNA;HOMER1;HSPA12A;PUM1;TMEM196;DCLK1;ST18;PUM2;CCDC88A;F…
Genes Up-Regulated In Expression In Normal Human Brain Vs Other Fetal Tissues GSE65399	HDSigDB 2021	Union of DiestVMaleAccent3 and EstVMaleAccent3 (female low/KO downreg, male high/KO upreg)	299	2903	7.00856e-28	2.33298	1.84835e-29	154.351	CYFIP2;NCKAP1;GMFB;TRIO;PANK3;PLEKHB2;FRMPD4;NEXMIF;ABAT;MSANTD4;UBE2L3;ZMIZ1;PPP2R1A;DPYSL3;LUC7L;PKNOX2;CALN1;AGFG1;SOX5;UNC13C;MEF2C;ANK2;SOX11;ANK3;HPCAL4;ASRGL1;THAP2;MTURN;STX1B;WDR82;RUFY3;RELCH;KCTD12;NECAB1;SET;MEAF6;PDE1A;MYCBP2;LYPD1;AGAP2;MTMR9;NEDD4L;SLAIN2;PIK3R1;MTMR4;MAP2;RAD21;STXBP5;MAP4;RIMKLB;RAB11FIP4;SRPK2;GSTM3;FZD3;DTNA;HOMER1;HSPA12A;PUM1;TMEM196;DCLK1;ST18;PUM2;CCDC88A;F…
Genes Up-Regulated In HD Markers In Human Fibroblasts GSE45516	HDSigDB 2021	DiestVMaleAccent1 (Diestrus vs Male, female high/KO upreg, male low/KO downreg)	167	1210	8.91249e-28	3.06104	2.38899e-29	201.735	ANKRD13C;NCKAP1;CHIC1;GMFB;CSE1L;FMR1;CCNC;IKZF2;FGF1;IPO7;RPS6KA3;SLK;SCP2;KPNA4;TRAPPC13;ARID2;SOX6;MEF2A;USP8;PRKAB2;EIF1AX;RALGAPA1;DIO2;FBXO11;ATG12;XRN1;RUFY3;PAPPA;SREK1;ATF6;CLOCK;CUL5;STXBP4;KMT2C;MYCBP2;MTMR9;PDS5B;MACROH2A1;TTBK2;ARHGAP12;KIF3B;RAD21;DHX36;UBR5;ZKSCAN1;SRPK2;TCAF1;ANKRD26;ACBD5;CPSF6;DENND4A;CAV2;CEP350;GFPT1;OGA;SMARCA5;TRAPPC8;HELZ;KLHL24;HOOK3;FOXN2;PHC3;ACADSB;SMAD…
Genes Up-Regulated In HD Markers In Human Fibroblasts GSE45516	HDSigDB 2021	Union of DiestVMaleAccent3 and EstVMaleAccent3 (female low/KO downreg, male high/KO upreg)	167	1210	8.91249e-28	3.06104	2.38899e-29	201.735	ANKRD13C;NCKAP1;CHIC1;GMFB;CSE1L;FMR1;CCNC;IKZF2;FGF1;IPO7;RPS6KA3;SLK;SCP2;KPNA4;TRAPPC13;ARID2;SOX6;MEF2A;USP8;PRKAB2;EIF1AX;RALGAPA1;DIO2;FBXO11;ATG12;XRN1;RUFY3;PAPPA;SREK1;ATF6;CLOCK;CUL5;STXBP4;KMT2C;MYCBP2;MTMR9;PDS5B;MACROH2A1;TTBK2;ARHGAP12;KIF3B;RAD21;DHX36;UBR5;ZKSCAN1;SRPK2;TCAF1;ANKRD26;ACBD5;CPSF6;DENND4A;CAV2;CEP350;GFPT1;OGA;SMARCA5;TRAPPC8;HELZ;KLHL24;HOOK3;FOXN2;PHC3;ACADSB;SMAD…
Genes Down-Regulated In 4-Deoxypyridoxine Treated STHdhQ111 Vs Control GSE129143	HDSigDB 2021	DiestVMaleAccent1 (Diestrus vs Male, female high/KO upreg, male low/KO downreg)	148	997	8.92911e-28	3.30171	2.43205e-29	217.537	ITSN2;CYFIP1;NCKAP1;GMFB;TRIO;PANK3;UBE3C;TRRAP;PRDM2;ARHGAP35;AMOT;PTAR1;OSBP;KPNA6;PPFIA1;EP300;SLC25A44;KPNA1;NSF;VPS33A;MRTFB;AP1B1;UHMK1;BCR;TANC1;ILF3;RALGAPB;XRN1;XRN2;PKP4;ANAPC1;ATP6V1A;MTMR1;DNMT1;ABHD2;CLEC16A;MTMR9;BAZ2A;SLAIN2;PDS5B;RASAL2;MTMR4;STK4;GIGYF2;CAMSAP2;KIF3B;UBR5;EIF4EBP2;ABL2;KLHDC10;SPECC1;CBX5;CEP350;SEC16A;EXOC6B;PRRC2C;NUP153;BTBD7;TRAPPC8;PHC3;MED13L;AFDN;DIAPH1;ST…
Genes Down-Regulated In 4-Deoxypyridoxine Treated STHdhQ111 Vs Control GSE129143	HDSigDB 2021	Union of DiestVMaleAccent3 and EstVMaleAccent3 (female low/KO downreg, male high/KO upreg)	148	997	8.92911e-28	3.30171	2.43205e-29	217.537	ITSN2;CYFIP1;NCKAP1;GMFB;TRIO;PANK3;UBE3C;TRRAP;PRDM2;ARHGAP35;AMOT;PTAR1;OSBP;KPNA6;PPFIA1;EP300;SLC25A44;KPNA1;NSF;VPS33A;MRTFB;AP1B1;UHMK1;BCR;TANC1;ILF3;RALGAPB;XRN1;XRN2;PKP4;ANAPC1;ATP6V1A;MTMR1;DNMT1;ABHD2;CLEC16A;MTMR9;BAZ2A;SLAIN2;PDS5B;RASAL2;MTMR4;STK4;GIGYF2;CAMSAP2;KIF3B;UBR5;EIF4EBP2;ABL2;KLHDC10;SPECC1;CBX5;CEP350;SEC16A;EXOC6B;PRRC2C;NUP153;BTBD7;TRAPPC8;PHC3;MED13L;AFDN;DIAPH1;ST…
eVLMC Embryonic Vascular And Leptomeningeal Cell-Enriched Genes PMID30078729	HDSigDB 2021	DiestVMaleAccent1 (Diestrus vs Male, female high/KO upreg, male low/KO downreg)	364	3870	3.28785e-27	2.16843	9.09739e-29	140.009	CYFIP1;NCKAP1;GMFB;AHCYL1;TRIO;PANK3;SPARC;TRRAP;ARAF;ABAT;ACTB;ALKBH5;RNF114;ZMIZ1;PPP2R1A;GPBP1;DPYSL3;CHORDC1;LUC7L;CIAO2A;GLUL;AP1B1;ANK2;SOX11;ANK3;RC3H2;ATG12;SNHG14;XRN1;WDR82;XRN2;SUCLG2;RELCH;KCTD12;ATF6;ALDH7A1;SET;EPAS1;MAGED1;MYCBP2;DCUN1D1;NOLC1;BAZ2A;SLAIN2;PIK3R1;PLA2G6;SMIM7;GIGYF2;TTBK2;LARP1;MAP2;RAD21;DHX36;DPH3;MAP4;ARGLU1;SCAI;SRPK2;CREBBP;FZD3;GSTM1;PHC1;TIPARP;NCAPH2;INTS2;…
eVLMC Embryonic Vascular And Leptomeningeal Cell-Enriched Genes PMID30078729	HDSigDB 2021	Union of DiestVMaleAccent3 and EstVMaleAccent3 (female low/KO downreg, male high/KO upreg)	364	3870	3.28785e-27	2.16843	9.09739e-29	140.009	CYFIP1;NCKAP1;GMFB;AHCYL1;TRIO;PANK3;SPARC;TRRAP;ARAF;ABAT;ACTB;ALKBH5;RNF114;ZMIZ1;PPP2R1A;GPBP1;DPYSL3;CHORDC1;LUC7L;CIAO2A;GLUL;AP1B1;ANK2;SOX11;ANK3;RC3H2;ATG12;SNHG14;XRN1;WDR82;XRN2;SUCLG2;RELCH;KCTD12;ATF6;ALDH7A1;SET;EPAS1;MAGED1;MYCBP2;DCUN1D1;NOLC1;BAZ2A;SLAIN2;PIK3R1;PLA2G6;SMIM7;GIGYF2;TTBK2;LARP1;MAP2;RAD21;DHX36;DPH3;MAP4;ARGLU1;SCAI;SRPK2;CREBBP;FZD3;GSTM1;PHC1;TIPARP;NCAPH2;INTS2;…
Genes Down-Regulated In dSPNs Of zQ175DN Vs HdhQ20 PMID32681824	HDSigDB 2021	DiestVMaleAccent1 (Diestrus vs Male, female high/KO upreg, male low/KO downreg)	124	758	5.52948e-27	3.65643	1.5539e-28	234.127	CYFIP2;OTUD4;NCKAP1;RIPOR1;AHCYL1;UBXN2B;DGKB;WIPF2;CTNND2;DCAF6;SYNGAP1;SESN3;ZMIZ1;PPP4R4;CALN1;PPP1R16B;PRKCI;TMOD2;MRTFB;HPCAL4;BCR;STX1B;GPD1;SIK3;SREK1;ATF6;JCAD;NECAB1;MEAF6;KMT2A;AGAP2;CLEC16A;NEDD4L;FOXO3;ATXN1;ZMAT4;ABL2;SRGAP3;TPPP;RAB6B;SOCS7;EGR2;EGR3;HOMER1;NEBL;SEC16A;CORO2A;DCLK1;ARHGAP33;ARHGAP32;SLC6A8;DLG2;AGO4;AGO2;BCL2;PICALM;GSK3B;SETD2;HIP1;USP31;CELF5;ARRB1;DUSP18;SMG7;PIT…
Genes Down-Regulated In dSPNs Of zQ175DN Vs HdhQ20 PMID32681824	HDSigDB 2021	Union of DiestVMaleAccent3 and EstVMaleAccent3 (female low/KO downreg, male high/KO upreg)	124	758	5.52948e-27	3.65643	1.5539e-28	234.127	CYFIP2;OTUD4;NCKAP1;RIPOR1;AHCYL1;UBXN2B;DGKB;WIPF2;CTNND2;DCAF6;SYNGAP1;SESN3;ZMIZ1;PPP4R4;CALN1;PPP1R16B;PRKCI;TMOD2;MRTFB;HPCAL4;BCR;STX1B;GPD1;SIK3;SREK1;ATF6;JCAD;NECAB1;MEAF6;KMT2A;AGAP2;CLEC16A;NEDD4L;FOXO3;ATXN1;ZMAT4;ABL2;SRGAP3;TPPP;RAB6B;SOCS7;EGR2;EGR3;HOMER1;NEBL;SEC16A;CORO2A;DCLK1;ARHGAP33;ARHGAP32;SLC6A8;DLG2;AGO4;AGO2;BCL2;PICALM;GSK3B;SETD2;HIP1;USP31;CELF5;ARRB1;DUSP18;SMG7;PIT…
PLC Pericyte Lineage Cell-Enriched Genes PMID30078729	HDSigDB 2021	DiestVMaleAccent1 (Diestrus vs Male, female high/KO upreg, male low/KO downreg)	382	4163	1.02373e-26	2.12433	2.92116e-28	134.683	CYFIP1;GMFB;AHCYL1;TRIO;PANK3;SPARC;MTRR;TRRAP;ARAF;CCNC;ABAT;MSANTD4;ACTB;DCAF6;ALKBH5;RNF114;DPYSL5;ZMIZ1;PPP2R1A;GPBP1;DPYSL3;CHORDC1;PLCE1;LUC7L;CIAO2A;SOX6;GLUL;AGFG1;MEF2C;MRTFB;ANK2;SOX11;ANK3;ATG12;SNHG14;WDR82;XRN2;SUCLG2;KCTD12;ATF6;ALDH7A1;SET;EPAS1;MAGED1;MYCBP2;DCUN1D1;NOLC1;BAZ2A;PIK3R1;MTMR4;SMIM7;GIGYF2;TTBK2;LARP1;MAP2;PRKAR2A;RAD21;DHX36;MCMBP;MAP4;ARGLU1;SCAI;SRPK2;CREBBP;FZD3;…
PLC Pericyte Lineage Cell-Enriched Genes PMID30078729	HDSigDB 2021	Union of DiestVMaleAccent3 and EstVMaleAccent3 (female low/KO downreg, male high/KO upreg)	382	4163	1.02373e-26	2.12433	2.92116e-28	134.683	CYFIP1;GMFB;AHCYL1;TRIO;PANK3;SPARC;MTRR;TRRAP;ARAF;CCNC;ABAT;MSANTD4;ACTB;DCAF6;ALKBH5;RNF114;DPYSL5;ZMIZ1;PPP2R1A;GPBP1;DPYSL3;CHORDC1;PLCE1;LUC7L;CIAO2A;SOX6;GLUL;AGFG1;MEF2C;MRTFB;ANK2;SOX11;ANK3;ATG12;SNHG14;WDR82;XRN2;SUCLG2;KCTD12;ATF6;ALDH7A1;SET;EPAS1;MAGED1;MYCBP2;DCUN1D1;NOLC1;BAZ2A;PIK3R1;MTMR4;SMIM7;GIGYF2;TTBK2;LARP1;MAP2;PRKAR2A;RAD21;DHX36;MCMBP;MAP4;ARGLU1;SCAI;SRPK2;CREBBP;FZD3;…
HD Grade 3 Markers In Human Caudate Nucleus (HG-U133B) GSE3790	HDSigDB 2021	DiestVMaleAccent1 (Diestrus vs Male, female high/KO upreg, male low/KO downreg)	193	1566	5.02553e-26	2.71321	1.45573e-27	167.661	FRMPD4;NEXMIF;IKZF2;NUDT5;SYNGAP1;DPYSL5;PPP4R4;GPBP1;LUC7L;SOX6;CALN1;PAQR8;MED1;RFX3;MTURN;UHMK1;BCR;STX1B;RUFY3;ATF7;SMIM3;DCUN1D1;AGAP2;NEDD4L;SLAIN2;TMTC1;MAP2;PRKAR2A;DPH3;MCMBP;MAP4;RIMKLB;ARGLU1;RAB11FIP4;SCAI;DTNA;HOMER1;NEBL;IRF2BP2;RAB27B;GNG12;PHC3;TMEM196;DCLK1;POU6F1;PEX5L;CSRNP3;NRSN1;HIP1;FMN2;ARHGAP5;OSBPL11;NHSL1;OTUD6B;NCS1;REV3L;IDS;TEAD1;PCMTD1;CNOT6L;PCYT1A;CCDC117;ASH1L;PRO…
HD Grade 3 Markers In Human Caudate Nucleus (HG-U133B) GSE3790	HDSigDB 2021	Union of DiestVMaleAccent3 and EstVMaleAccent3 (female low/KO downreg, male high/KO upreg)	193	1566	5.02553e-26	2.71321	1.45573e-27	167.661	FRMPD4;NEXMIF;IKZF2;NUDT5;SYNGAP1;DPYSL5;PPP4R4;GPBP1;LUC7L;SOX6;CALN1;PAQR8;MED1;RFX3;MTURN;UHMK1;BCR;STX1B;RUFY3;ATF7;SMIM3;DCUN1D1;AGAP2;NEDD4L;SLAIN2;TMTC1;MAP2;PRKAR2A;DPH3;MCMBP;MAP4;RIMKLB;ARGLU1;RAB11FIP4;SCAI;DTNA;HOMER1;NEBL;IRF2BP2;RAB27B;GNG12;PHC3;TMEM196;DCLK1;POU6F1;PEX5L;CSRNP3;NRSN1;HIP1;FMN2;ARHGAP5;OSBPL11;NHSL1;OTUD6B;NCS1;REV3L;IDS;TEAD1;PCMTD1;CNOT6L;PCYT1A;CCDC117;ASH1L;PRO…
Expression In 12 Wk R6/2 HD Mice (Set2) GSE9804	HDSigDB 2021	DiestVMaleAccent1 (Diestrus vs Male, female high/KO upreg, male low/KO downreg)	405	4573	1.63226e-25	2.0566	4.7987e-27	124.633	NCKAP1;TRIO;NEXMIF;ALKBH8;ZMIZ1;PPP4R4;DPYSL3;LUC7L;UNC13C;PRKAB2;MEF2C;PRKCI;RFX3;SOX11;RC3H2;BCR;WDR82;RUFY3;ATF6;CLOCK;MTMR1;LYPD1;MTMR9;NOLC1;NEDD4L;IQGAP2;GIGYF2;LARP1;PRKAR2A;RAD21;MCMBP;CREBBP;FZD3;GSTM1;HOMER1;NEBL;HOMER2;TIPARP;EDEM1;EXOC6B;BBIP1;PRDX6;ST18;EHD3;LAS1L;AGO4;NMT1;FXYD6;PCDHB3;CDK12;CDK14;GSTM5;PHF3;LRSAM1;SMG1;BTG1;NRSN1;TGFB1I1;SETD7;SNX12;ADK;FMN2;ARHGAP5;OSBPL11;LYST;ME…
Expression In 12 Wk R6/2 HD Mice (Set2) GSE9804	HDSigDB 2021	Union of DiestVMaleAccent3 and EstVMaleAccent3 (female low/KO downreg, male high/KO upreg)	405	4573	1.63226e-25	2.0566	4.7987e-27	124.633	NCKAP1;TRIO;NEXMIF;ALKBH8;ZMIZ1;PPP4R4;DPYSL3;LUC7L;UNC13C;PRKAB2;MEF2C;PRKCI;RFX3;SOX11;RC3H2;BCR;WDR82;RUFY3;ATF6;CLOCK;MTMR1;LYPD1;MTMR9;NOLC1;NEDD4L;IQGAP2;GIGYF2;LARP1;PRKAR2A;RAD21;MCMBP;CREBBP;FZD3;GSTM1;HOMER1;NEBL;HOMER2;TIPARP;EDEM1;EXOC6B;BBIP1;PRDX6;ST18;EHD3;LAS1L;AGO4;NMT1;FXYD6;PCDHB3;CDK12;CDK14;GSTM5;PHF3;LRSAM1;SMG1;BTG1;NRSN1;TGFB1I1;SETD7;SNX12;ADK;FMN2;ARHGAP5;OSBPL11;LYST;ME…
Genes Changed In Astrocytes Of HdhQ170 Vs HdhQ20 PMID32681824	HDSigDB 2021	DiestVMaleAccent1 (Diestrus vs Male, female high/KO upreg, male low/KO downreg)	108	623	1.6405e-25	3.88246	4.89383e-27	235.207	CYFIP2;DGKG;RAB3C;TRIO;TRRAP;GDA;NEXMIF;DOCK10;RIMS1;KIF5A;TNR;RGS8;MEF2A;NSF;MEF2C;RALGAPA1;LMO3;MAGI2;MRTFB;HPCAL4;STX1B;XRN1;RUFY3;EEF1A2;SMS;PKP4;RELCH;JCAD;NECAB1;INO80D;PDE1A;MYCBP2;LIN7A;PDS5B;NYAP2;DNAJC27;PLCXD2;GIGYF2;SNTG1;UBR5;TASOR;TPPP;SKIL;ZKSCAN1;GSTM3;EGR2;TCAF1;HOMER1;HSPA12A;PUM1;ARHGAP26;TMEM196;PUM2;PEX5L;DLG2;GNAL;NBEA;NF1;SMG1;CSRNP3;DDX3X;CLTC;RASGRF1;USP34;ELAVL4;RSF1;LDB…
Genes Changed In Astrocytes Of HdhQ170 Vs HdhQ20 PMID32681824	HDSigDB 2021	Union of DiestVMaleAccent3 and EstVMaleAccent3 (female low/KO downreg, male high/KO upreg)	108	623	1.6405e-25	3.88246	4.89383e-27	235.207	CYFIP2;DGKG;RAB3C;TRIO;TRRAP;GDA;NEXMIF;DOCK10;RIMS1;KIF5A;TNR;RGS8;MEF2A;NSF;MEF2C;RALGAPA1;LMO3;MAGI2;MRTFB;HPCAL4;STX1B;XRN1;RUFY3;EEF1A2;SMS;PKP4;RELCH;JCAD;NECAB1;INO80D;PDE1A;MYCBP2;LIN7A;PDS5B;NYAP2;DNAJC27;PLCXD2;GIGYF2;SNTG1;UBR5;TASOR;TPPP;SKIL;ZKSCAN1;GSTM3;EGR2;TCAF1;HOMER1;HSPA12A;PUM1;ARHGAP26;TMEM196;PUM2;PEX5L;DLG2;GNAL;NBEA;NF1;SMG1;CSRNP3;DDX3X;CLTC;RASGRF1;USP34;ELAVL4;RSF1;LDB…
Genes Up-Regulated In Pvalb/Th-expressing Interneurons Of R6/2 Vs WT PMID32681824	HDSigDB 2021	DiestVMaleAccent1 (Diestrus vs Male, female high/KO upreg, male low/KO downreg)	84	404	3.47558e-25	4.79546	1.05184e-26	286.849	ANKRD13C;UBE3C;NEXMIF;USP34;FMN2;LDB2;DOCK10;RIMS1;NIPBL;MED13;TNR;EP300;KPNA4;PHACTR1;KDM6A;NCOA2;RALGAPA1;MAGI2;VPS13D;RFX3;ANK2;CKAP5;DNAJC1;NCOR1;MMP16;LRRC7;RUFY3;DOK6;EXOC4;SIK3;FAM193A;ZFPM2;CLOCK;XPR1;PAFAH1B1;CUL5;ROCK1;STXBP4;KMT2C;ANKRD12;MYCBP2;LIN7A;AKAP6;PDS5B;PPM1E;GIGYF2;STRN3;FGD4;BTAF1;SNTG1;DHX36;TRA2A;ABL2;PAK3;SCAI;CLASP1;JAZF1;KLHDC10;ARFGEF1;HSPA8;CREBBP;EXOC6B;YLPM1;PRRC2C…
Genes Up-Regulated In Pvalb/Th-expressing Interneurons Of R6/2 Vs WT PMID32681824	HDSigDB 2021	Union of DiestVMaleAccent3 and EstVMaleAccent3 (female low/KO downreg, male high/KO upreg)	84	404	3.47558e-25	4.79546	1.05184e-26	286.849	ANKRD13C;UBE3C;NEXMIF;USP34;FMN2;LDB2;DOCK10;RIMS1;NIPBL;MED13;TNR;EP300;KPNA4;PHACTR1;KDM6A;NCOA2;RALGAPA1;MAGI2;VPS13D;RFX3;ANK2;CKAP5;DNAJC1;NCOR1;MMP16;LRRC7;RUFY3;DOK6;EXOC4;SIK3;FAM193A;ZFPM2;CLOCK;XPR1;PAFAH1B1;CUL5;ROCK1;STXBP4;KMT2C;ANKRD12;MYCBP2;LIN7A;AKAP6;PDS5B;PPM1E;GIGYF2;STRN3;FGD4;BTAF1;SNTG1;DHX36;TRA2A;ABL2;PAK3;SCAI;CLASP1;JAZF1;KLHDC10;ARFGEF1;HSPA8;CREBBP;EXOC6B;YLPM1;PRRC2C…
Top Oligodendrocyte-Expressed Genes In Humans And Mice PMID29892006	HDSigDB 2021	DiestVMaleAccent1 (Diestrus vs Male, female high/KO upreg, male low/KO downreg)	143	1000	3.90529e-25	3.14249	1.19877e-26	187.563	CYFIP2;NCKAP1;GMFB;AHCYL1;SPARC;CSE1L;FGF1;ACTB;DOCK10;SCP2;GNPTAB;PPP2R1A;GPBP1;PLS3;TNR;GLUL;PPP1R16B;PAQR8;TMOD2;ANK2;MMD2;ANK3;TUG1;ASRGL1;SNHG14;RUFY3;SELENOP;SIK3;PKP4;ANKRD40;SREK1;XIST;ATP6V1A;SET;ABHD4;MAGED1;KMT2C;GLO1;MYCBP2;ANKRD12;SLC1A2;PIK3R1;NDRG2;SMIM7;RAD21;TPPP;MAP4;ZKSCAN1;SRPK2;SPECC1;HSPA8;CREBBP;UBE2H;CBX5;IDH1;EXOC6B;OGA;DSTN;PRRC2C;HOOK3;KLHL24;HSPA2;EEF2;FOXN2;GNG12;PRDX…
Top Oligodendrocyte-Expressed Genes In Humans And Mice PMID29892006	HDSigDB 2021	Union of DiestVMaleAccent3 and EstVMaleAccent3 (female low/KO downreg, male high/KO upreg)	143	1000	3.90529e-25	3.14249	1.19877e-26	187.563	CYFIP2;NCKAP1;GMFB;AHCYL1;SPARC;CSE1L;FGF1;ACTB;DOCK10;SCP2;GNPTAB;PPP2R1A;GPBP1;PLS3;TNR;GLUL;PPP1R16B;PAQR8;TMOD2;ANK2;MMD2;ANK3;TUG1;ASRGL1;SNHG14;RUFY3;SELENOP;SIK3;PKP4;ANKRD40;SREK1;XIST;ATP6V1A;SET;ABHD4;MAGED1;KMT2C;GLO1;MYCBP2;ANKRD12;SLC1A2;PIK3R1;NDRG2;SMIM7;RAD21;TPPP;MAP4;ZKSCAN1;SRPK2;SPECC1;HSPA8;CREBBP;UBE2H;CBX5;IDH1;EXOC6B;OGA;DSTN;PRRC2C;HOOK3;KLHL24;HSPA2;EEF2;FOXN2;GNG12;PRDX…
Genes Changed In Sst/Npy-expressing Interneurons Of zQ175DN Vs WT PMID32681824	HDSigDB 2021	DiestVMaleAccent1 (Diestrus vs Male, female high/KO upreg, male low/KO downreg)	125	806	4.85113e-25	3.42621	1.51008e-26	203.705	CYFIP2;DGKG;CYFIP1;RAB3C;FRMPD4;DGKB;NEXMIF;ABAT;RPS6KA3;RIMS4;ZMIZ1;PPP4R4;SCMH1;TNR;MEF2A;NSF;TMOD2;MAGI2;LARP4B;BCR;AR;XRN1;RUFY3;EEF1A2;XRN2;TBC1D24;UBE2V2;PKP4;TBC1D23;XPR1;INO80D;CUL5;ANKRD12;SLAIN2;PDS5A;MED12L;ORC5;LARP1;ATXN1;SNTG1;ZMAT4;UBR5;MAP4;LRRC4C;LONRF2;KLHDC10;HSPA8;UBE2H;ACBD5;CBX5;HOMER1;GFPT1;IQSEC3;PRRC2C;RAB27B;ARHGAP26;PBX1;MED13L;PUM2;CNOT4;CCDC88A;DIAPH2;FER;GNAL;CNOT1;A…
Genes Changed In Sst/Npy-expressing Interneurons Of zQ175DN Vs WT PMID32681824	HDSigDB 2021	Union of DiestVMaleAccent3 and EstVMaleAccent3 (female low/KO downreg, male high/KO upreg)	125	806	4.85113e-25	3.42621	1.51008e-26	203.705	CYFIP2;DGKG;CYFIP1;RAB3C;FRMPD4;DGKB;NEXMIF;ABAT;RPS6KA3;RIMS4;ZMIZ1;PPP4R4;SCMH1;TNR;MEF2A;NSF;TMOD2;MAGI2;LARP4B;BCR;AR;XRN1;RUFY3;EEF1A2;XRN2;TBC1D24;UBE2V2;PKP4;TBC1D23;XPR1;INO80D;CUL5;ANKRD12;SLAIN2;PDS5A;MED12L;ORC5;LARP1;ATXN1;SNTG1;ZMAT4;UBR5;MAP4;LRRC4C;LONRF2;KLHDC10;HSPA8;UBE2H;ACBD5;CBX5;HOMER1;GFPT1;IQSEC3;PRRC2C;RAB27B;ARHGAP26;PBX1;MED13L;PUM2;CNOT4;CCDC88A;DIAPH2;FER;GNAL;CNOT1;A…
Genes Down-Regulated In Expression In 15 Wk R6/2 HD Mice GSE38219	HDSigDB 2021	DiestVMaleAccent1 (Diestrus vs Male, female high/KO upreg, male low/KO downreg)	412	4711	5.86758e-25	2.03078	1.85185e-26	120.326	CYFIP2;IPO11;CHIC1;TRIO;WIPF2;ARAF;ABAT;PREX2;RNF114;SCP2;ZMIZ1;PPP4R4;PKNOX2;MEF2A;MED1;UNC13C;PRKAB2;SAP30BP;MEF2C;PRKCI;MRTFB;HPCAL4;ATG12;TMEM126B;ATF6;MTMR1;LXN;ANAPC15;LYPD1;NEDD4L;GIGYF2;RAD21;FZD3;GSTM1;HOMER1;NEBL;HOMER2;TIPARP;EXOC6B;BBIP1;PRDX6;PBX1;ST18;FOSL2;FAM135B;SLC6A8;AGO3;NMT1;CPEB2;CDK14;SFXN5;GSTM5;CPEB4;CDK16;NRSN1;PHF20;SETD7;SNX12;ADK;ARHGAP5;LYST;MYOM3;PCMTD2;TRIM2;AP3S2;…
Genes Down-Regulated In Expression In 15 Wk R6/2 HD Mice GSE38219	HDSigDB 2021	Union of DiestVMaleAccent3 and EstVMaleAccent3 (female low/KO downreg, male high/KO upreg)	412	4711	5.86758e-25	2.03078	1.85185e-26	120.326	CYFIP2;IPO11;CHIC1;TRIO;WIPF2;ARAF;ABAT;PREX2;RNF114;SCP2;ZMIZ1;PPP4R4;PKNOX2;MEF2A;MED1;UNC13C;PRKAB2;SAP30BP;MEF2C;PRKCI;MRTFB;HPCAL4;ATG12;TMEM126B;ATF6;MTMR1;LXN;ANAPC15;LYPD1;NEDD4L;GIGYF2;RAD21;FZD3;GSTM1;HOMER1;NEBL;HOMER2;TIPARP;EXOC6B;BBIP1;PRDX6;PBX1;ST18;FOSL2;FAM135B;SLC6A8;AGO3;NMT1;CPEB2;CDK14;SFXN5;GSTM5;CPEB4;CDK16;NRSN1;PHF20;SETD7;SNX12;ADK;ARHGAP5;LYST;MYOM3;PCMTD2;TRIM2;AP3S2;…
Genes Changed In Chat-expressing Interneurons Of R6/2 Vs WT PMID32681824	HDSigDB 2021	DiestVMaleAccent1 (Diestrus vs Male, female high/KO upreg, male low/KO downreg)	156	1153	6.16506e-25	2.96414	1.97239e-26	175.442	RAB3C;ZFYVE9;FRMPD4;DGKB;ARAF;UBE3A;NUDT5;ARHGAP35;DCAF6;DOCK10;RIMS1;TATDN1;SLK;ATCAY;ZMIZ1;PPP4R4;SLC16A7;CALN1;MEF2A;UNC13C;RALGAPA1;MAGI2;DYRK1A;FBXO11;KCTD6;TANC1;RALGAPB;LIX1;TBL1XR1;DOK6;SIK3;ZFPM2;SHC3;CUL5;STXBP4;PDE1A;MYCBP2;SLC1A2;MTMR9;NEDD4L;LIN7A;TMTC1;NYAP2;PDS5A;GIGYF2;ARHGAP12;CAMSAP2;ATXN1;SNTG1;BTBD3;ZMAT4;SRGAP3;LRRC4C;ZKSCAN1;SRPK2;SPECC1;HSPA8;CREBBP;ACBD5;CPSF6;HOMER1;NEBL;…
Genes Changed In Chat-expressing Interneurons Of R6/2 Vs WT PMID32681824	HDSigDB 2021	Union of DiestVMaleAccent3 and EstVMaleAccent3 (female low/KO downreg, male high/KO upreg)	156	1153	6.16506e-25	2.96414	1.97239e-26	175.442	RAB3C;ZFYVE9;FRMPD4;DGKB;ARAF;UBE3A;NUDT5;ARHGAP35;DCAF6;DOCK10;RIMS1;TATDN1;SLK;ATCAY;ZMIZ1;PPP4R4;SLC16A7;CALN1;MEF2A;UNC13C;RALGAPA1;MAGI2;DYRK1A;FBXO11;KCTD6;TANC1;RALGAPB;LIX1;TBL1XR1;DOK6;SIK3;ZFPM2;SHC3;CUL5;STXBP4;PDE1A;MYCBP2;SLC1A2;MTMR9;NEDD4L;LIN7A;TMTC1;NYAP2;PDS5A;GIGYF2;ARHGAP12;CAMSAP2;ATXN1;SNTG1;BTBD3;ZMAT4;SRGAP3;LRRC4C;ZKSCAN1;SRPK2;SPECC1;HSPA8;CREBBP;ACBD5;CPSF6;HOMER1;NEBL;…
Genes Changed In dSPNs Of R6/2 Vs WT PMID32681824	HDSigDB 2021	DiestVMaleAccent1 (Diestrus vs Male, female high/KO upreg, male low/KO downreg)	147	1059	1.49454e-24	3.03902	4.8461e-26	177.141	CYFIP2;NCKAP1;RAB3C;AHCYL1;FRMPD4;DGKB;NEXMIF;UBE3A;DCAF6;SESN3;PPP4R4;SCMH1;EP300;TNR;PDE8B;CALN1;PPP1R16B;NSF;UNC13C;PRKCI;RALGAPA1;MAGI2;ANK2;ANK3;BCR;RUFY3;DOK6;ATF6;JCAD;CUL5;ABHD2;PDE1A;ANKRD12;AGAP2;NEDD4L;LIN7A;IQGAP2;NYAP2;GIGYF2;ATXN1;FUT9;MAP2;ZMAT4;LRRC4C;ARGLU1;KLHDC10;RAP1GAP2;HSPA8;CREBBP;HOMER1;NEBL;DENND4A;EXOC6B;PRRC2C;ARHGAP26;PBX1;DCLK1;ARHGAP33;CCDC88A;ARHGAP32;FAM135B;DIAPH2…
Genes Changed In dSPNs Of R6/2 Vs WT PMID32681824	HDSigDB 2021	Union of DiestVMaleAccent3 and EstVMaleAccent3 (female low/KO downreg, male high/KO upreg)	147	1059	1.49454e-24	3.03902	4.8461e-26	177.141	CYFIP2;NCKAP1;RAB3C;AHCYL1;FRMPD4;DGKB;NEXMIF;UBE3A;DCAF6;SESN3;PPP4R4;SCMH1;EP300;TNR;PDE8B;CALN1;PPP1R16B;NSF;UNC13C;PRKCI;RALGAPA1;MAGI2;ANK2;ANK3;BCR;RUFY3;DOK6;ATF6;JCAD;CUL5;ABHD2;PDE1A;ANKRD12;AGAP2;NEDD4L;LIN7A;IQGAP2;NYAP2;GIGYF2;ATXN1;FUT9;MAP2;ZMAT4;LRRC4C;ARGLU1;KLHDC10;RAP1GAP2;HSPA8;CREBBP;HOMER1;NEBL;DENND4A;EXOC6B;PRRC2C;ARHGAP26;PBX1;DCLK1;ARHGAP33;CCDC88A;ARHGAP32;FAM135B;DIAPH2…
Genes Down-Regulated In dSPNs Of HdhQ170 Vs HdhQ20 PMID32681824	HDSigDB 2021	DiestVMaleAccent1 (Diestrus vs Male, female high/KO upreg, male low/KO downreg)	108	641	1.70124e-24	3.74767	5.58991e-26	217.913	CYFIP2;NCKAP1;RIPOR1;AHCYL1;UBXN2B;DGKB;WIPF2;CTNND2;DCAF6;SYNGAP1;SESN3;ZMIZ1;PPP4R4;PDE8B;CALN1;PPP1R16B;PRKCI;TMOD2;HPCAL4;BCR;STX1B;GPD1;SIK3;SREK1;ATF6;JCAD;NECAB1;MEAF6;KMT2A;AGAP2;NEDD4L;FOXO3;ATXN1;ZMAT4;ABL2;SRGAP3;RAB6B;SOCS7;EGR2;EGR3;HOMER1;NEBL;DCLK1;FOSL2;ARHGAP33;ARHGAP32;DLG2;AGO4;AGO2;BCL2;GSK3B;USP31;PYGM;ARRB1;DUSP18;ARHGAP5;PPP1R9A;PITPNC1;SYNE1;SPRED1;SIPA1L1;DENND11;PSD3;PHA…
Genes Down-Regulated In dSPNs Of HdhQ170 Vs HdhQ20 PMID32681824	HDSigDB 2021	Union of DiestVMaleAccent3 and EstVMaleAccent3 (female low/KO downreg, male high/KO upreg)	108	641	1.70124e-24	3.74767	5.58991e-26	217.913	CYFIP2;NCKAP1;RIPOR1;AHCYL1;UBXN2B;DGKB;WIPF2;CTNND2;DCAF6;SYNGAP1;SESN3;ZMIZ1;PPP4R4;PDE8B;CALN1;PPP1R16B;PRKCI;TMOD2;HPCAL4;BCR;STX1B;GPD1;SIK3;SREK1;ATF6;JCAD;NECAB1;MEAF6;KMT2A;AGAP2;NEDD4L;FOXO3;ATXN1;ZMAT4;ABL2;SRGAP3;RAB6B;SOCS7;EGR2;EGR3;HOMER1;NEBL;DCLK1;FOSL2;ARHGAP33;ARHGAP32;DLG2;AGO4;AGO2;BCL2;GSK3B;USP31;PYGM;ARRB1;DUSP18;ARHGAP5;PPP1R9A;PITPNC1;SYNE1;SPRED1;SIPA1L1;DENND11;PSD3;PHA…
Genes Up-Regulated In Foxp2/Olfm3-expressing Neurons Of R6/2 Vs WT PMID32681824	HDSigDB 2021	DiestVMaleAccent1 (Diestrus vs Male, female high/KO upreg, male low/KO downreg)	65	257	2.0563e-24	6.11303	6.87675e-26	354.183	RERE;GSK3B;USP34;UBE3A;IKZF2;BICD1;RIMS1;REV3L;TNR;ERC2;KDM6A;NCOA2;SGIP1;MAGI2;VPS13A;ANK2;PHF20L1;DNAJC1;XRN1;SETBP1;RUFY3;DOK6;FAM193A;XPR1;PAFAH1B1;ROCK1;PDE1A;ANKRD12;PRICKLE2;AKAP6;LIN7A;MED12L;STRN3;FGD4;BTAF1;MAP2;SNTG1;TRA2A;SRGAP3;CLASP1;KLHDC10;CLASP2;JAZF1;HSPA8;CREBBP;EXOC6B;PRRC2C;HELZ;PUM1;CDC42BPA;ACADSB;TMEM196;MED13L;MAPK10;AGBL4;MKLN1;PAN3;FMNL2;APC;PPP2R2B;DMXL1;GNAQ;TRIP12;TC…
Genes Down-Regulated In Corticostriatal Projection Neurons Of R6/2 Vs WT PMID32681824	HDSigDB 2021	DiestVMaleAccent1 (Diestrus vs Male, female high/KO upreg, male low/KO downreg)	142	1006	2.0563e-24	3.09081	6.93434e-26	179.053	OTUD4;CYFIP2;CCDC71L;RAB3C;ALDH1L1;RIPOR1;GMFB;GDA;OGDHL;RORB;IPO5;RIMS1;RPS6KA3;SYNGAP1;GPBP1;SLC16A7;RGS8;PDE8B;GLUL;FAM81A;MAP3K5;CALN1;MED1;MEF2C;TMOD2;MAGI2;ANK2;KCTD6;STX1B;TBL1XR1;EEF1A2;GPD1;UBE2V2;ATF6;JCAD;ABHD2;PDE1A;AGAP2;LYPD1;LIN7A;PIK3R1;RASAL2;NYAP2;FOXO3;SMIM7;PLCXD2;GOLGA7B;ATXN1;FUT9;BTBD3;ZMAT4;TPPP;RAB6B;SKIL;RAB11FIP4;SCAI;RAP1GAP2;EGR2;FZD3;EGR3;HOMER1;TIPARP;HOMER2;IQSEC3;…
Genes Up-Regulated In Foxp2/Olfm3-expressing Neurons Of R6/2 Vs WT PMID32681824	HDSigDB 2021	Union of DiestVMaleAccent3 and EstVMaleAccent3 (female low/KO downreg, male high/KO upreg)	65	257	2.0563e-24	6.11303	6.87675e-26	354.183	RERE;GSK3B;USP34;UBE3A;IKZF2;BICD1;RIMS1;REV3L;TNR;ERC2;KDM6A;NCOA2;SGIP1;MAGI2;VPS13A;ANK2;PHF20L1;DNAJC1;XRN1;SETBP1;RUFY3;DOK6;FAM193A;XPR1;PAFAH1B1;ROCK1;PDE1A;ANKRD12;PRICKLE2;AKAP6;LIN7A;MED12L;STRN3;FGD4;BTAF1;MAP2;SNTG1;TRA2A;SRGAP3;CLASP1;KLHDC10;CLASP2;JAZF1;HSPA8;CREBBP;EXOC6B;PRRC2C;HELZ;PUM1;CDC42BPA;ACADSB;TMEM196;MED13L;MAPK10;AGBL4;MKLN1;PAN3;FMNL2;APC;PPP2R2B;DMXL1;GNAQ;TRIP12;TC…
Genes Down-Regulated In Corticostriatal Projection Neurons Of R6/2 Vs WT PMID32681824	HDSigDB 2021	Union of DiestVMaleAccent3 and EstVMaleAccent3 (female low/KO downreg, male high/KO upreg)	142	1006	2.0563e-24	3.09081	6.93434e-26	179.053	OTUD4;CYFIP2;CCDC71L;RAB3C;ALDH1L1;RIPOR1;GMFB;GDA;OGDHL;RORB;IPO5;RIMS1;RPS6KA3;SYNGAP1;GPBP1;SLC16A7;RGS8;PDE8B;GLUL;FAM81A;MAP3K5;CALN1;MED1;MEF2C;TMOD2;MAGI2;ANK2;KCTD6;STX1B;TBL1XR1;EEF1A2;GPD1;UBE2V2;ATF6;JCAD;ABHD2;PDE1A;AGAP2;LYPD1;LIN7A;PIK3R1;RASAL2;NYAP2;FOXO3;SMIM7;PLCXD2;GOLGA7B;ATXN1;FUT9;BTBD3;ZMAT4;TPPP;RAB6B;SKIL;RAB11FIP4;SCAI;RAP1GAP2;EGR2;FZD3;EGR3;HOMER1;TIPARP;HOMER2;IQSEC3;…
Genes Down-Regulated In Neuro2a Htt72Q-i Vs Htt25Q-ni PMID28743452	HDSigDB 2021	DiestVMaleAccent1 (Diestrus vs Male, female high/KO upreg, male low/KO downreg)	288	2898	3.535e-24	2.21083	1.20737e-25	126.849	IPO11;GMFB;PANK3;CCNC;ABAT;IKZF2;SYNGAP1;PEG13;DPYSL5;PLCE1;CIAO2A;MED1;PRKCI;MRTFB;SOX11;ANK3;RC3H2;THAP2;UHMK1;BCR;MOSMO;SNHG14;MARF1;WDR82;RELCH;MTMR1;NECAB1;SET;STXBP4;MYCBP2;DCUN1D1;NOLC1;TMTC1;MTMR4;IQGAP2;LARP1;PRKAR2A;RAD21;DHX36;MCMBP;ARGLU1;SCAI;ZRANB3;FZD3;INTS2;PRRC2C;HSPA12A;PHC3;PBX1;ST18;MED13L;CCDC88A;EHD3;AGO3;AGO1;AGO2;ANP32E;CPEB2;SFXN5;SMG1;SETD2;AHCTF1;CDKN1B;NRSN1;HIP1;SETD7…
Genes Down-Regulated In Neuro2a Htt72Q-i Vs Htt25Q-ni PMID28743452	HDSigDB 2021	Union of DiestVMaleAccent3 and EstVMaleAccent3 (female low/KO downreg, male high/KO upreg)	288	2898	3.535e-24	2.21083	1.20737e-25	126.849	IPO11;GMFB;PANK3;CCNC;ABAT;IKZF2;SYNGAP1;PEG13;DPYSL5;PLCE1;CIAO2A;MED1;PRKCI;MRTFB;SOX11;ANK3;RC3H2;THAP2;UHMK1;BCR;MOSMO;SNHG14;MARF1;WDR82;RELCH;MTMR1;NECAB1;SET;STXBP4;MYCBP2;DCUN1D1;NOLC1;TMTC1;MTMR4;IQGAP2;LARP1;PRKAR2A;RAD21;DHX36;MCMBP;ARGLU1;SCAI;ZRANB3;FZD3;INTS2;PRRC2C;HSPA12A;PHC3;PBX1;ST18;MED13L;CCDC88A;EHD3;AGO3;AGO1;AGO2;ANP32E;CPEB2;SFXN5;SMG1;SETD2;AHCTF1;CDKN1B;NRSN1;HIP1;SETD7…
LIN28 SIRNA MCF7 HUMAN GSE71012 RNASEQ DOWN	Lit Mined TF Perturbation Signatures	DiestVMaleAccent1 (Diestrus vs Male, female high/KO upreg, male low/KO downreg)	93	475	4.10887e-24	4.47229	2.10603e-27	274.71	CYFIP1;NCKAP1;TOP2B;KDM5B;GSK3B;SMG1;TRIO;AHCYL1;B4GALT1;DDX3X;CLTC;USP34;ABAT;ARRB1;RSF1;UBE3A;EPRS;SMG7;ARHGAP5;IPO7;AFF4;DCAF6;IPO5;XPO1;ZMIZ1;IDS;TNPO1;PRKCI;ARHGEF12;EIF1AX;RALGAPA1;NCOA3;VPS13D;FRS2;SMC1A;CKAP5;RC3H2;PTBP3;UHMK1;EEF1G;RALGAPB;MMP16;CTDSP2;LRRC58;SET;KMT2A;ABHD2;USO1;BAZ2A;UBFD1;CBL;PURB;BCLAF1;LARP1;FAM168A;KIF3B;PRKAR2A;RAD21;UBR5;G3BP2;EIF4EBP2;ANKRD52;SRGAP3;MAP4;SKIL;LO…
LIN28 SIRNA MCF7 HUMAN GSE71012 RNASEQ DOWN	Lit Mined TF Perturbation Signatures	EstVMaleAccent1 (Estrus vs Male, female high/KO upreg, male low/KO downreg)	93	475	4.10887e-24	4.47229	2.10603e-27	274.71	CYFIP1;NCKAP1;TOP2B;KDM5B;GSK3B;SMG1;TRIO;AHCYL1;B4GALT1;DDX3X;CLTC;USP34;ABAT;ARRB1;RSF1;UBE3A;EPRS;SMG7;ARHGAP5;IPO7;AFF4;DCAF6;IPO5;XPO1;ZMIZ1;IDS;TNPO1;PRKCI;ARHGEF12;EIF1AX;RALGAPA1;NCOA3;VPS13D;FRS2;SMC1A;CKAP5;RC3H2;PTBP3;UHMK1;EEF1G;RALGAPB;MMP16;CTDSP2;LRRC58;SET;KMT2A;ABHD2;USO1;BAZ2A;UBFD1;CBL;PURB;BCLAF1;LARP1;FAM168A;KIF3B;PRKAR2A;RAD21;UBR5;G3BP2;EIF4EBP2;ANKRD52;SRGAP3;MAP4;SKIL;LO…
LIN28 SIRNA MCF7 HUMAN GSE71012 RNASEQ DOWN	Lit Mined TF Perturbation Signatures	DiestVMaleAccent3 (Diestrus vs Male, female low/KO downreg, male high/KO upreg)	93	475	4.10887e-24	4.47229	2.10603e-27	274.71	CYFIP1;NCKAP1;TOP2B;KDM5B;GSK3B;SMG1;TRIO;AHCYL1;B4GALT1;DDX3X;CLTC;USP34;ABAT;ARRB1;RSF1;UBE3A;EPRS;SMG7;ARHGAP5;IPO7;AFF4;DCAF6;IPO5;XPO1;ZMIZ1;IDS;TNPO1;PRKCI;ARHGEF12;EIF1AX;RALGAPA1;NCOA3;VPS13D;FRS2;SMC1A;CKAP5;RC3H2;PTBP3;UHMK1;EEF1G;RALGAPB;MMP16;CTDSP2;LRRC58;SET;KMT2A;ABHD2;USO1;BAZ2A;UBFD1;CBL;PURB;BCLAF1;LARP1;FAM168A;KIF3B;PRKAR2A;RAD21;UBR5;G3BP2;EIF4EBP2;ANKRD52;SRGAP3;MAP4;SKIL;LO…
Genes Down-Regulated In Expression In Hsp90 Inhibitor Treated R6/2 HD Mice Vs WT Mice GSE29681	HDSigDB 2021	DiestVMaleAccent1 (Diestrus vs Male, female high/KO upreg, male low/KO downreg)	328	3482	4.76748e-24	2.11824	1.64893e-25	120.876	ITSN2;CYFIP2;NCKAP1;AHCYL1;TRIO;ARAF;ACTB;DCAF6;PREX2;RPS6KA3;ZMIZ1;PPP4R4;GPBP1;CHORDC1;LUC7L;GLUL;CALN1;MEF2A;MED1;UNC13C;MEF2C;PRKCI;OXSM;MRTFB;MMD2;ANK2;ANK3;HPCAL4;ASRGL1;ATG12;BCR;STX1B;SNHG14;PPP1R3C;XRN2;SIK3;KCTD12;ATF6;RIN2;ALDH7A1;CLOCK;NECAB1;LXN;SET;EPAS1;LYPD1;DCUN1D1;NEDD4L;TMTC1;PIK3R1;IQGAP2;GIGYF2;MAP2;STXBP5;MAP4;ARGLU1;RAB11FIP4;ZRANB3;EGR2;FZD3;GSTM1;EGR3;DTNA;HOMER1;NEBL;TIP…
Genes Down-Regulated In Expression In Hsp90 Inhibitor Treated R6/2 HD Mice Vs WT Mice GSE29681	HDSigDB 2021	Union of DiestVMaleAccent3 and EstVMaleAccent3 (female low/KO downreg, male high/KO upreg)	328	3482	4.76748e-24	2.11824	1.64893e-25	120.876	ITSN2;CYFIP2;NCKAP1;AHCYL1;TRIO;ARAF;ACTB;DCAF6;PREX2;RPS6KA3;ZMIZ1;PPP4R4;GPBP1;CHORDC1;LUC7L;GLUL;CALN1;MEF2A;MED1;UNC13C;MEF2C;PRKCI;OXSM;MRTFB;MMD2;ANK2;ANK3;HPCAL4;ASRGL1;ATG12;BCR;STX1B;SNHG14;PPP1R3C;XRN2;SIK3;KCTD12;ATF6;RIN2;ALDH7A1;CLOCK;NECAB1;LXN;SET;EPAS1;LYPD1;DCUN1D1;NEDD4L;TMTC1;PIK3R1;IQGAP2;GIGYF2;MAP2;STXBP5;MAP4;ARGLU1;RAB11FIP4;ZRANB3;EGR2;FZD3;GSTM1;EGR3;DTNA;HOMER1;NEBL;TIP…
Genes Changed In Endothelial Cells Of zQ175DN Vs WT PMID32681824	HDSigDB 2021	DiestVMaleAccent1 (Diestrus vs Male, female high/KO upreg, male low/KO downreg)	140	994	5.70937e-24	3.07825	1.99939e-25	175.065	ANKRD13C;NCKAP1;SPARC;ZFYVE9;DGKB;CTNND2;UBE3A;ACTB;DCAF6;PREX2;RIMS1;SESN3;SCMH1;CHORDC1;KPNA1;AGFG1;SOX5;MEF2A;MED1;SAP30BP;RALGAPA1;MAGI2;RFX3;ANK2;ANK3;LARP4B;FBXO11;SELENOP;PKP4;TBC1D23;SREK1;RIN2;ANAPC1;JCAD;INO80D;KMT2A;KMT2C;MYCBP2;RASAL2;PDS5A;CAMSAP2;LARP1;SNTG1;MAP2;MCMBP;SRGAP3;MAP4;LRRC4C;SKIL;ARGLU1;MCL1;SRPK2;HSPA8;CREBBP;UBE2H;GSTM1;CPSF6;NEBL;EXOC6B;SMARCA5;BTBD7;EEF2;PUM1;PBX1;M…
Genes Changed In Endothelial Cells Of zQ175DN Vs WT PMID32681824	HDSigDB 2021	Union of DiestVMaleAccent3 and EstVMaleAccent3 (female low/KO downreg, male high/KO upreg)	140	994	5.70937e-24	3.07825	1.99939e-25	175.065	ANKRD13C;NCKAP1;SPARC;ZFYVE9;DGKB;CTNND2;UBE3A;ACTB;DCAF6;PREX2;RIMS1;SESN3;SCMH1;CHORDC1;KPNA1;AGFG1;SOX5;MEF2A;MED1;SAP30BP;RALGAPA1;MAGI2;RFX3;ANK2;ANK3;LARP4B;FBXO11;SELENOP;PKP4;TBC1D23;SREK1;RIN2;ANAPC1;JCAD;INO80D;KMT2A;KMT2C;MYCBP2;RASAL2;PDS5A;CAMSAP2;LARP1;SNTG1;MAP2;MCMBP;SRGAP3;MAP4;LRRC4C;SKIL;ARGLU1;MCL1;SRPK2;HSPA8;CREBBP;UBE2H;GSTM1;CPSF6;NEBL;EXOC6B;SMARCA5;BTBD7;EEF2;PUM1;PBX1;M…
Genes Up-Regulated In Influence Of Hsp90 Inhibitor On Expression In WT Mice GSE29681	HDSigDB 2021	DiestVMaleAccent1 (Diestrus vs Male, female high/KO upreg, male low/KO downreg)	184	1529	1.55116e-23	2.6188	5.49915e-25	146.286	DGKB;CCNC;UBE3A;PRDM2;RORB;PREX2;DOCK10;PTAR1;PAIP2B;SLK;SESN3;PPP2R1A;GPBP1;CHORDC1;KIF5A;PLXNC1;TRAPPC13;MED1;UNC13C;PRKAB2;PRKCI;MMGT1;RALGAPA1;VPS33A;DIO2;ANK2;ANK3;FBXO11;RC3H2;ATG12;LZTFL1;RALGAPB;XRN2;SIK3;RELCH;HECA;KCTD12;TBC1D23;SREK1;ATF6;ALDH7A1;CLOCK;XPR1;NECAB1;ARHGEF26;CUL5;NEDD4L;UBFD1;PDS5B;STK4;DNAJC27;GIGYF2;ARHGAP12;CAMSAP2;ATXN1;MAP2;ZKSCAN8;DHX36;LRRC4C;RIMKLB;RAB6B;SCAI;SPE…
Genes Up-Regulated In Influence Of Hsp90 Inhibitor On Expression In WT Mice GSE29681	HDSigDB 2021	Union of DiestVMaleAccent3 and EstVMaleAccent3 (female low/KO downreg, male high/KO upreg)	184	1529	1.55116e-23	2.6188	5.49915e-25	146.286	DGKB;CCNC;UBE3A;PRDM2;RORB;PREX2;DOCK10;PTAR1;PAIP2B;SLK;SESN3;PPP2R1A;GPBP1;CHORDC1;KIF5A;PLXNC1;TRAPPC13;MED1;UNC13C;PRKAB2;PRKCI;MMGT1;RALGAPA1;VPS33A;DIO2;ANK2;ANK3;FBXO11;RC3H2;ATG12;LZTFL1;RALGAPB;XRN2;SIK3;RELCH;HECA;KCTD12;TBC1D23;SREK1;ATF6;ALDH7A1;CLOCK;XPR1;NECAB1;ARHGEF26;CUL5;NEDD4L;UBFD1;PDS5B;STK4;DNAJC27;GIGYF2;ARHGAP12;CAMSAP2;ATXN1;MAP2;ZKSCAN8;DHX36;LRRC4C;RIMKLB;RAB6B;SCAI;SPE…
Neuron Gene Module From Cerebral Cortex PMID18849986	HDSigDB 2021	DiestVMaleAccent1 (Diestrus vs Male, female high/KO upreg, male low/KO downreg)	134	940	2.14534e-23	3.11067	7.69837e-25	172.716	ITSN2;GMFB;PLEKHB2;ZFYVE9;NAB1;CCNC;PRDM2;UBE3A;ABAT;UBE2L3;IPO5;RGS5;RIMS1;RPS6KA3;DPYSL3;NFATC2IP;KPNA4;KPNA1;PPP1R16B;MEF2C;PRKCI;EIF1AX;S100A1;ANK2;DCTD;ILF3;TBL1XR1;RUFY3;UBE2V2;ATP6V1A;MTMR1;SET;KMT2A;CUL5;MAX;ABHD2;ANKRD12;NOLC1;CREBL2;PDS5B;MTMR4;STK4;MACROH2A1;MAP2;RAD21;G3BP2;ZKSCAN5;SRPK2;HSPA8;TCAF1;UBE2H;FZD3;ANKRD26;CPSF6;GFPT1;OGA;RAB27B;DCLK1;AZIN1;PUM2;CCDC88A;DLG2;ECHDC1;UBE2N;N…
Neuron Gene Module From Cerebral Cortex PMID18849986	HDSigDB 2021	Union of DiestVMaleAccent3 and EstVMaleAccent3 (female low/KO downreg, male high/KO upreg)	134	940	2.14534e-23	3.11067	7.69837e-25	172.716	ITSN2;GMFB;PLEKHB2;ZFYVE9;NAB1;CCNC;PRDM2;UBE3A;ABAT;UBE2L3;IPO5;RGS5;RIMS1;RPS6KA3;DPYSL3;NFATC2IP;KPNA4;KPNA1;PPP1R16B;MEF2C;PRKCI;EIF1AX;S100A1;ANK2;DCTD;ILF3;TBL1XR1;RUFY3;UBE2V2;ATP6V1A;MTMR1;SET;KMT2A;CUL5;MAX;ABHD2;ANKRD12;NOLC1;CREBL2;PDS5B;MTMR4;STK4;MACROH2A1;MAP2;RAD21;G3BP2;ZKSCAN5;SRPK2;HSPA8;TCAF1;UBE2H;FZD3;ANKRD26;CPSF6;GFPT1;OGA;RAB27B;DCLK1;AZIN1;PUM2;CCDC88A;DLG2;ECHDC1;UBE2N;N…
Genes Changed In dSPNs Of zQ175DN Vs HdhQ20 PMID32681824	HDSigDB 2021	DiestVMaleAccent1 (Diestrus vs Male, female high/KO upreg, male low/KO downreg)	151	1138	2.98542e-23	2.88456	1.0842e-24	159.174	OTUD4;CYFIP2;NCKAP1;RIPOR1;AHCYL1;UBXN2B;DGKB;CTNND2;WIPF2;DCAF6;PREX2;TATDN1;SYNGAP1;SESN3;ZMIZ1;PPP4R4;DPYSL3;CALN1;PPP1R16B;PRKCI;PHYH;RALGAPA1;TMOD2;MRTFB;SOX11;HPCAL4;BCR;STX1B;TANC1;RUFY3;GPD1;SIK3;SREK1;ATF6;JCAD;NECAB1;MEAF6;KMT2A;MAOB;CLEC16A;AGAP2;NEDD4L;FOXO3;NDRG2;ATXN1;ZMAT4;ABL2;SRGAP3;TPPP;SOCS7;RAB6B;HSPA8;EGR2;GSTM1;EGR3;HOMER1;NEBL;SEC16A;DSTN;CORO2A;TMEM196;DCLK1;ARHGAP33;ARHGA…
Genes Changed In dSPNs Of zQ175DN Vs HdhQ20 PMID32681824	HDSigDB 2021	Union of DiestVMaleAccent3 and EstVMaleAccent3 (female low/KO downreg, male high/KO upreg)	151	1138	2.98542e-23	2.88456	1.0842e-24	159.174	OTUD4;CYFIP2;NCKAP1;RIPOR1;AHCYL1;UBXN2B;DGKB;CTNND2;WIPF2;DCAF6;PREX2;TATDN1;SYNGAP1;SESN3;ZMIZ1;PPP4R4;DPYSL3;CALN1;PPP1R16B;PRKCI;PHYH;RALGAPA1;TMOD2;MRTFB;SOX11;HPCAL4;BCR;STX1B;TANC1;RUFY3;GPD1;SIK3;SREK1;ATF6;JCAD;NECAB1;MEAF6;KMT2A;MAOB;CLEC16A;AGAP2;NEDD4L;FOXO3;NDRG2;ATXN1;ZMAT4;ABL2;SRGAP3;TPPP;SOCS7;RAB6B;HSPA8;EGR2;GSTM1;EGR3;HOMER1;NEBL;SEC16A;DSTN;CORO2A;TMEM196;DCLK1;ARHGAP33;ARHGA…
NP1b Neural Progenitor Cell-Enriched Genes PMID30078729	HDSigDB 2021	DiestVMaleAccent1 (Diestrus vs Male, female high/KO upreg, male low/KO downreg)	410	4777	3.87736e-23	1.97446	1.42489e-24	108.413	CYFIP2;CYFIP1;NCKAP1;CHIC1;GMFB;TRIO;TRRAP;WIPF2;ARAF;MSANTD4;ALKBH5;SYNGAP1;RNF114;DPYSL5;ZMIZ1;GPBP1;DPYSL3;PLCE1;LUC7L;MEF2C;RFX3;FRS2;SOX11;RC3H2;ATG12;BCR;WDR82;TCEANC2;ATF6;MTMR1;SET;MEAF6;NOLC1;NEDD4L;BAZ2A;SLAIN2;MTMR4;IQGAP2;GIGYF2;LARP1;PRKAR2A;RAD21;MCMBP;CREBBP;FZD3;GSTM1;TIPARP;NCAPH2;PRRC2C;IRF2BP2;BBIP1;PBX1;SLC6A8;AGO1;NMT1;FXYD6;CDK12;CPEB2;CDK14;GSTM5;CDK16;PYGB;SETD2;BTG1;CDKN1…
NP1b Neural Progenitor Cell-Enriched Genes PMID30078729	HDSigDB 2021	Union of DiestVMaleAccent3 and EstVMaleAccent3 (female low/KO downreg, male high/KO upreg)	410	4777	3.87736e-23	1.97446	1.42489e-24	108.413	CYFIP2;CYFIP1;NCKAP1;CHIC1;GMFB;TRIO;TRRAP;WIPF2;ARAF;MSANTD4;ALKBH5;SYNGAP1;RNF114;DPYSL5;ZMIZ1;GPBP1;DPYSL3;PLCE1;LUC7L;MEF2C;RFX3;FRS2;SOX11;RC3H2;ATG12;BCR;WDR82;TCEANC2;ATF6;MTMR1;SET;MEAF6;NOLC1;NEDD4L;BAZ2A;SLAIN2;MTMR4;IQGAP2;GIGYF2;LARP1;PRKAR2A;RAD21;MCMBP;CREBBP;FZD3;GSTM1;TIPARP;NCAPH2;PRRC2C;IRF2BP2;BBIP1;PBX1;SLC6A8;AGO1;NMT1;FXYD6;CDK12;CPEB2;CDK14;GSTM5;CDK16;PYGB;SETD2;BTG1;CDKN1…
OPC1cyc Oligodendrocyte Precursor Cell-Enriched Genes PMID30078729	HDSigDB 2021	DiestVMaleAccent1 (Diestrus vs Male, female high/KO upreg, male low/KO downreg)	295	3051	5.91042e-23	2.14384	2.19756e-24	116.785	CYFIP2;CYFIP1;NCKAP1;IPO11;GMFB;AHCYL1;TRIO;PANK3;SPARC;TRRAP;ARAF;CCNC;ACTB;RNF114;ZMIZ1;PPP2R1A;GPBP1;DPYSL3;CHORDC1;LUC7L;CIAO2A;SOX6;GLUL;SOX5;MMD2;ANK2;SOX11;ANK3;RC3H2;ASRGL1;WDR82;XRN2;ATF6;SET;MAGED1;MYCBP2;LYPD1;DCUN1D1;AGAP2;PIK3R1;SMIM7;GIGYF2;TTBK2;MAP2;PRKAR2A;RAD21;DHX36;ARGLU1;SCAI;SRPK2;FZD3;GSTM1;NCAPH2;PRRC2C;BBIP1;PUM1;GNG12;PBX1;DCLK1;MED13L;POU6F1;PUM2;CCDC88A;EHD3;SLC6A8;NMT…
OPC1cyc Oligodendrocyte Precursor Cell-Enriched Genes PMID30078729	HDSigDB 2021	Union of DiestVMaleAccent3 and EstVMaleAccent3 (female low/KO downreg, male high/KO upreg)	295	3051	5.91042e-23	2.14384	2.19756e-24	116.785	CYFIP2;CYFIP1;NCKAP1;IPO11;GMFB;AHCYL1;TRIO;PANK3;SPARC;TRRAP;ARAF;CCNC;ACTB;RNF114;ZMIZ1;PPP2R1A;GPBP1;DPYSL3;CHORDC1;LUC7L;CIAO2A;SOX6;GLUL;SOX5;MMD2;ANK2;SOX11;ANK3;RC3H2;ASRGL1;WDR82;XRN2;ATF6;SET;MAGED1;MYCBP2;LYPD1;DCUN1D1;AGAP2;PIK3R1;SMIM7;GIGYF2;TTBK2;MAP2;PRKAR2A;RAD21;DHX36;ARGLU1;SCAI;SRPK2;FZD3;GSTM1;NCAPH2;PRRC2C;BBIP1;PUM1;GNG12;PBX1;DCLK1;MED13L;POU6F1;PUM2;CCDC88A;EHD3;SLC6A8;NMT…
Genes Down-Regulated In Cysteamine Treated STHdhQ111 Vs Control GSE129143	HDSigDB 2021	DiestVMaleAccent1 (Diestrus vs Male, female high/KO upreg, male low/KO downreg)	88	477	1.17735e-22	4.13362	4.42844e-24	222.281	CYFIP1;GSK3B;KDM5C;HIP1;UBE3C;USP31;TRRAP;USP32;LRRK2;USP34;ARRB1;CROT;OSBPL11;LYST;AFF4;SH3RF1;ARHGAP35;DUSP11;DSTYK;PTAR1;GNPTAB;KPNA6;PPFIA1;HMG20A;ERC2;TNPO1;SPTAN1;COA5;ARHGEF11;NCOA2;ZYG11B;PCYT1A;ARHGEF12;VPS13C;NCOA3;VPS13D;RBSN;ZHX1;UHMK1;BCR;TANC1;ILF3;RALGAPB;TRAF3;CTDSP2;LCOR;PKP4;SFT2D2;B4GALT6;ANAPC1;MTMR1;CLEC16A;HTT;SLAIN2;STK4;PRR14L;KIF3B;UBR5;ABL2;ANKRD52;CLASP1;KLHDC10;CLASP2;…
Genes Down-Regulated In Cysteamine Treated STHdhQ111 Vs Control GSE129143	HDSigDB 2021	Union of DiestVMaleAccent3 and EstVMaleAccent3 (female low/KO downreg, male high/KO upreg)	88	477	1.17735e-22	4.13362	4.42844e-24	222.281	CYFIP1;GSK3B;KDM5C;HIP1;UBE3C;USP31;TRRAP;USP32;LRRK2;USP34;ARRB1;CROT;OSBPL11;LYST;AFF4;SH3RF1;ARHGAP35;DUSP11;DSTYK;PTAR1;GNPTAB;KPNA6;PPFIA1;HMG20A;ERC2;TNPO1;SPTAN1;COA5;ARHGEF11;NCOA2;ZYG11B;PCYT1A;ARHGEF12;VPS13C;NCOA3;VPS13D;RBSN;ZHX1;UHMK1;BCR;TANC1;ILF3;RALGAPB;TRAF3;CTDSP2;LCOR;PKP4;SFT2D2;B4GALT6;ANAPC1;MTMR1;CLEC16A;HTT;SLAIN2;STK4;PRR14L;KIF3B;UBR5;ABL2;ANKRD52;CLASP1;KLHDC10;CLASP2;…
Genes Up-Regulated In Expression In 12 Wk R6/2 HD Mice (Set2) GSE9804	HDSigDB 2021	DiestVMaleAccent1 (Diestrus vs Male, female high/KO upreg, male low/KO downreg)	259	2567	2.52291e-22	2.21118	9.5986e-24	117.194	TRIO;NEXMIF;KANTR;IKZF2;ALKBH8;UBE2L3;ZMIZ1;PPP2R1A;DPYSL3;LUC7L;AGFG1;PRKAB2;MEF2C;AP1B1;SOX11;RC3H2;MTURN;WDR82;RUFY3;RELCH;ZFPM2;CLOCK;MTMR1;STXBP4;MAGED1;MYCBP2;MTMR9;NOLC1;GIGYF2;TTBK2;LARP1;PRKAR2A;RAD21;DHX36;DPH3;MCMBP;STXBP5;MAP4;RIMKLB;PCK2;SRPK2;CREBBP;HOMER2;EDEM1;IQSEC3;EXOC6B;BBIP1;HSPA12A;CCDC88A;EHD3;LAS1L;NMT1;ANP32E;FXYD6;MAGED2;PCDHB3;CDK12;CDK14;PHF3;HBS1L;LRSAM1;SMG1;AHCTF1;C…
Genes Up-Regulated In Expression In 12 Wk R6/2 HD Mice (Set2) GSE9804	HDSigDB 2021	Union of DiestVMaleAccent3 and EstVMaleAccent3 (female low/KO downreg, male high/KO upreg)	259	2567	2.52291e-22	2.21118	9.5986e-24	117.194	TRIO;NEXMIF;KANTR;IKZF2;ALKBH8;UBE2L3;ZMIZ1;PPP2R1A;DPYSL3;LUC7L;AGFG1;PRKAB2;MEF2C;AP1B1;SOX11;RC3H2;MTURN;WDR82;RUFY3;RELCH;ZFPM2;CLOCK;MTMR1;STXBP4;MAGED1;MYCBP2;MTMR9;NOLC1;GIGYF2;TTBK2;LARP1;PRKAR2A;RAD21;DHX36;DPH3;MCMBP;STXBP5;MAP4;RIMKLB;PCK2;SRPK2;CREBBP;HOMER2;EDEM1;IQSEC3;EXOC6B;BBIP1;HSPA12A;CCDC88A;EHD3;LAS1L;NMT1;ANP32E;FXYD6;MAGED2;PCDHB3;CDK12;CDK14;PHF3;HBS1L;LRSAM1;SMG1;AHCTF1;C…
Genes Down-Regulated In Cyproheptadine Treated STHdhQ111 Vs Control GSE129143	HDSigDB 2021	DiestVMaleAccent1 (Diestrus vs Male, female high/KO upreg, male low/KO downreg)	230	2169	2.56159e-22	2.30971	9.85653e-24	122.354	CYFIP1;AHCYL1;TRIO;WIPF2;ALKBH8;DCAF6;SYNGAP1;SOX5;PRKCI;OXSM;MRTFB;FRS2;ANK3;THAP2;MTURN;BCR;MARF1;PPP1R3C;PAPPA;SIK3;SUCLG2;KCTD12;ZFPM2;MTMR1;LXN;AGAP2;BAZ2A;MTMR4;TTBK2;MAP2;RAD21;DECR2;RAB11FIP4;ZRANB3;CREBBP;GSTM1;EGR3;PHC1;EXOC6B;PUM1;PHC3;ACADSB;PBX1;DCLK1;MED13L;POU6F1;PUM2;EHD3;AGO4;AGO1;AGO2;RGL1;CDK14;EZH1;GSTM5;TOP2B;SETD2;CDKN1B;HIP1;TGFB1I1;SETD7;ADK;RSF1;CROT;ARHGAP5;OSBPL11;PCMTD…
Genes Down-Regulated In Cyproheptadine Treated STHdhQ111 Vs Control GSE129143	HDSigDB 2021	Union of DiestVMaleAccent3 and EstVMaleAccent3 (female low/KO downreg, male high/KO upreg)	230	2169	2.56159e-22	2.30971	9.85653e-24	122.354	CYFIP1;AHCYL1;TRIO;WIPF2;ALKBH8;DCAF6;SYNGAP1;SOX5;PRKCI;OXSM;MRTFB;FRS2;ANK3;THAP2;MTURN;BCR;MARF1;PPP1R3C;PAPPA;SIK3;SUCLG2;KCTD12;ZFPM2;MTMR1;LXN;AGAP2;BAZ2A;MTMR4;TTBK2;MAP2;RAD21;DECR2;RAB11FIP4;ZRANB3;CREBBP;GSTM1;EGR3;PHC1;EXOC6B;PUM1;PHC3;ACADSB;PBX1;DCLK1;MED13L;POU6F1;PUM2;EHD3;AGO4;AGO1;AGO2;RGL1;CDK14;EZH1;GSTM5;TOP2B;SETD2;CDKN1B;HIP1;TGFB1I1;SETD7;ADK;RSF1;CROT;ARHGAP5;OSBPL11;PCMTD…
Genes Up-Regulated In dSPNs Of 9 Wks R6/2 Vs WT PMID32681824	HDSigDB 2021	DiestVMaleAccent1 (Diestrus vs Male, female high/KO upreg, male low/KO downreg)	248	2416	2.72455e-22	2.2437	1.06014e-23	118.694	CYFIP1;TRIO;PANK3;MTRR;NEXMIF;WIPF2;MSANTD4;IKZF2;ALKBH8;UBE2L3;PPP2R1A;DPYSL3;LUC7L;GLUL;AGFG1;RFX3;FRS2;SOX11;THAP2;MTURN;SNHG14;RUFY3;RELCH;MTMR1;MAOB;STXBP4;MAGED1;BAZ2A;SLAIN2;GIGYF2;LARP1;PRKAR2A;RAD21;DHX36;DPH3;MCMBP;STXBP5;MAP4;ARGLU1;CREBBP;GSTM1;DTNA;IQSEC3;EXOC6B;SMARCA5;PRRC2C;PHC3;ACADSB;CCDC88A;EHD3;LAS1L;AGO3;NMT1;ANP32E;MAGED2;CDK12;CDK14;EZH1;GSTM5;PHF3;PYGB;AHCTF1;CSRNP3;CDKN1B…
Genes Up-Regulated In dSPNs Of 9 Wks R6/2 Vs WT PMID32681824	HDSigDB 2021	Union of DiestVMaleAccent3 and EstVMaleAccent3 (female low/KO downreg, male high/KO upreg)	248	2416	2.72455e-22	2.2437	1.06014e-23	118.694	CYFIP1;TRIO;PANK3;MTRR;NEXMIF;WIPF2;MSANTD4;IKZF2;ALKBH8;UBE2L3;PPP2R1A;DPYSL3;LUC7L;GLUL;AGFG1;RFX3;FRS2;SOX11;THAP2;MTURN;SNHG14;RUFY3;RELCH;MTMR1;MAOB;STXBP4;MAGED1;BAZ2A;SLAIN2;GIGYF2;LARP1;PRKAR2A;RAD21;DHX36;DPH3;MCMBP;STXBP5;MAP4;ARGLU1;CREBBP;GSTM1;DTNA;IQSEC3;EXOC6B;SMARCA5;PRRC2C;PHC3;ACADSB;CCDC88A;EHD3;LAS1L;AGO3;NMT1;ANP32E;MAGED2;CDK12;CDK14;EZH1;GSTM5;PHF3;PYGB;AHCTF1;CSRNP3;CDKN1B…
HD Grade 3 Markers In Human Frontal Lobe BA4 (HG-U133A) GSE3790	HDSigDB 2021	DiestVMaleAccent1 (Diestrus vs Male, female high/KO upreg, male low/KO downreg)	105	654	3.66351e-22	3.52366	1.44133e-23	185.323	PLEKHB2;ZFYVE9;SLA;PRDM2;ARHGAP35;UBE2L3;YY1;DPYSL3;KIF5A;SLC16A7;MAP3K5;SOX5;MEF2A;MEF2C;PRKCI;EIF1AX;TMOD2;DYRK1A;LARP4B;ANK3;IPCEF1;ATG12;RNF41;ILF3;TYROBP;SIK3;RIN2;CUL5;ABHD2;PIK3R1;CAMSAP2;ATXN1;RAD21;NDP;MAP4;KLHDC10;TCAF1;UBE2H;DTNA;TIPARP;CEP350;KLHL24;PBX1;CCDC88A;PEX5L;DLG2;GNAL;AGO3;APPBP2;BCL2;NF1;GSK3B;BTG1;CSRNP3;HIP1;SMG7;LYST;TRIM2;PSD3;NCS1;IDS;CEP170;ARIH1;TNPO1;SPTAN1;KDM6A;HS…
HD Grade 3 Markers In Human Frontal Lobe BA4 (HG-U133A) GSE3790	HDSigDB 2021	Union of DiestVMaleAccent3 and EstVMaleAccent3 (female low/KO downreg, male high/KO upreg)	105	654	3.66351e-22	3.52366	1.44133e-23	185.323	PLEKHB2;ZFYVE9;SLA;PRDM2;ARHGAP35;UBE2L3;YY1;DPYSL3;KIF5A;SLC16A7;MAP3K5;SOX5;MEF2A;MEF2C;PRKCI;EIF1AX;TMOD2;DYRK1A;LARP4B;ANK3;IPCEF1;ATG12;RNF41;ILF3;TYROBP;SIK3;RIN2;CUL5;ABHD2;PIK3R1;CAMSAP2;ATXN1;RAD21;NDP;MAP4;KLHDC10;TCAF1;UBE2H;DTNA;TIPARP;CEP350;KLHL24;PBX1;CCDC88A;PEX5L;DLG2;GNAL;AGO3;APPBP2;BCL2;NF1;GSK3B;BTG1;CSRNP3;HIP1;SMG7;LYST;TRIM2;PSD3;NCS1;IDS;CEP170;ARIH1;TNPO1;SPTAN1;KDM6A;HS…
Up-regulated Genes In Gonadal Adipose Tissue Of 6 Mon HD Q175 Mice Vs WT GSE76752	HDSigDB 2021	DiestVMaleAccent1 (Diestrus vs Male, female high/KO upreg, male low/KO downreg)	324	3517	4.59723e-22	2.05112	1.82856e-23	107.388	ITSN2;CYFIP2;CYFIP1;TRIO;TRRAP;FRMPD4;NEXMIF;KANTR;ALKBH8;PREX2;SYNGAP1;ZMIZ1;DPYSL3;LUC7L;SOX5;MEF2A;MED1;UNC13C;MEF2C;PRKCI;MRTFB;RFX3;FRS2;PHKA1;ANK3;HPCAL4;BCR;MOSMO;MARF1;XRN1;RUFY3;PAPPA;ATF7;HECA;KCTD12;ZFPM2;ATF6;STXBP4;CEP85L;MYCBP2;AGAP2;BAZ2A;SLAIN2;TMTC1;MTMR4;IQGAP2;GIGYF2;TTBK2;EPB41L5;MAP2;PRKAR2A;STXBP5;RAB11FIP4;SCAI;NEBL;INTS2;EXOC6B;PRRC2C;RAB27B;PUM1;PHC3;MED13L;PUM2;CCDC88A;L…
Up-regulated Genes In Gonadal Adipose Tissue Of 6 Mon HD Q175 Mice Vs WT GSE76752	HDSigDB 2021	Union of DiestVMaleAccent3 and EstVMaleAccent3 (female low/KO downreg, male high/KO upreg)	324	3517	4.59723e-22	2.05112	1.82856e-23	107.388	ITSN2;CYFIP2;CYFIP1;TRIO;TRRAP;FRMPD4;NEXMIF;KANTR;ALKBH8;PREX2;SYNGAP1;ZMIZ1;DPYSL3;LUC7L;SOX5;MEF2A;MED1;UNC13C;MEF2C;PRKCI;MRTFB;RFX3;FRS2;PHKA1;ANK3;HPCAL4;BCR;MOSMO;MARF1;XRN1;RUFY3;PAPPA;ATF7;HECA;KCTD12;ZFPM2;ATF6;STXBP4;CEP85L;MYCBP2;AGAP2;BAZ2A;SLAIN2;TMTC1;MTMR4;IQGAP2;GIGYF2;TTBK2;EPB41L5;MAP2;PRKAR2A;STXBP5;RAB11FIP4;SCAI;NEBL;INTS2;EXOC6B;PRRC2C;RAB27B;PUM1;PHC3;MED13L;PUM2;CCDC88A;L…
Genes Changed In Loxapine Treated STHdhQ111 Vs Control GSE129143	HDSigDB 2021	DiestVMaleAccent1 (Diestrus vs Male, female high/KO upreg, male low/KO downreg)	245	2386	5.15784e-22	2.24026	2.07384e-23	117.009	CYFIP1;TRIO;WIPF2;IPP;NUDT5;ALKBH8;SOX5;OXSM;MRTFB;ANK3;ASRGL1;MTURN;BCR;WDR82;SIK3;SUCLG2;ATF7;KCTD12;ZFPM2;ATF6;RIN2;MTMR1;SDC4;MYCBP2;MTMR9;NOLC1;BAZ2A;SLAIN2;MTMR4;TTBK2;EPB41L5;DECR2;RAB11FIP4;PCK2;GSTM1;PHC1;EXOC6B;IRF2BP2;PUM1;PHC3;PRDX6;ACADSB;PBX1;DCLK1;POU6F1;EHD3;SLC6A8;AGO4;AGO1;AGO2;ECHDC1;CDK12;CDK14;EZH1;GSTM5;PYGB;TOP2B;HBS1L;LRSAM1;CDKN1B;HIP1;CITED2;SETD7;CROT;PRL;SH3RF1;NIPBL;D…
Genes Changed In Loxapine Treated STHdhQ111 Vs Control GSE129143	HDSigDB 2021	Union of DiestVMaleAccent3 and EstVMaleAccent3 (female low/KO downreg, male high/KO upreg)	245	2386	5.15784e-22	2.24026	2.07384e-23	117.009	CYFIP1;TRIO;WIPF2;IPP;NUDT5;ALKBH8;SOX5;OXSM;MRTFB;ANK3;ASRGL1;MTURN;BCR;WDR82;SIK3;SUCLG2;ATF7;KCTD12;ZFPM2;ATF6;RIN2;MTMR1;SDC4;MYCBP2;MTMR9;NOLC1;BAZ2A;SLAIN2;MTMR4;TTBK2;EPB41L5;DECR2;RAB11FIP4;PCK2;GSTM1;PHC1;EXOC6B;IRF2BP2;PUM1;PHC3;PRDX6;ACADSB;PBX1;DCLK1;POU6F1;EHD3;SLC6A8;AGO4;AGO1;AGO2;ECHDC1;CDK12;CDK14;EZH1;GSTM5;PYGB;TOP2B;HBS1L;LRSAM1;CDKN1B;HIP1;CITED2;SETD7;CROT;PRL;SH3RF1;NIPBL;D…
Genes Changed In R6/1 Good Vs WT GSE135057	HDSigDB 2021	DiestVMaleAccent1 (Diestrus vs Male, female high/KO upreg, male low/KO downreg)	387	4479	5.17851e-22	1.9613	2.10454e-23	102.41	CYFIP2;NCKAP1;IPO11;NEXMIF;MSANTD4;ALKBH8;PREX2;SYNGAP1;RNF114;SCP2;ZMIZ1;PPP4R4;DPYSL3;LUC7L;MED1;UNC13C;SAP30BP;PRKCI;PHKA1;BCR;RUFY3;ATF6;AGAP2;MTMR9;NEDD4L;IQGAP2;GIGYF2;GSTM3;CREBBP;GSTM1;PHC1;HOMER1;NEBL;TIPARP;EXOC6B;PRRC2C;IRF2BP2;TMEM196;PRDX6;FOSL2;EHD3;SLC6A8;AGO4;NMT1;FXYD6;PCDHB3;SFXN5;EZH1;GSTM5;CDK16;PHF3;PYGB;LRSAM1;NRSN1;PHF20;TGFB1I1;SNX12;PYGM;ARHGAP5;OSBPL11;MYOM3;NIPBL;DSTYK;…
Genes Changed In R6/1 Good Vs WT GSE135057	HDSigDB 2021	Union of DiestVMaleAccent3 and EstVMaleAccent3 (female low/KO downreg, male high/KO upreg)	387	4479	5.17851e-22	1.9613	2.10454e-23	102.41	CYFIP2;NCKAP1;IPO11;NEXMIF;MSANTD4;ALKBH8;PREX2;SYNGAP1;RNF114;SCP2;ZMIZ1;PPP4R4;DPYSL3;LUC7L;MED1;UNC13C;SAP30BP;PRKCI;PHKA1;BCR;RUFY3;ATF6;AGAP2;MTMR9;NEDD4L;IQGAP2;GIGYF2;GSTM3;CREBBP;GSTM1;PHC1;HOMER1;NEBL;TIPARP;EXOC6B;PRRC2C;IRF2BP2;TMEM196;PRDX6;FOSL2;EHD3;SLC6A8;AGO4;NMT1;FXYD6;PCDHB3;SFXN5;EZH1;GSTM5;CDK16;PHF3;PYGB;LRSAM1;NRSN1;PHF20;TGFB1I1;SNX12;PYGM;ARHGAP5;OSBPL11;MYOM3;NIPBL;DSTYK;…
Genes Up-Regulated In Expression In Ctip2 Null Vs WT Mouse Striatum GSE9330	HDSigDB 2021	DiestVMaleAccent1 (Diestrus vs Male, female high/KO upreg, male low/KO downreg)	153	1203	9.98225e-22	2.74352	4.09993e-23	141.424	OXNAD1;AHCYL1;TRIO;TRRAP;NEXMIF;FMR1;PRDM2;YY1;RIMS1;SESN3;DPYSL5;ZMIZ1;DPYSL3;LUC7L;TNR;PLS3;PLXNC1;RGS8;SOX6;GLUL;PKNOX2;MAP3K5;NSF;PHYH;EIF1AX;TMOD2;ANK2;SOX11;ANK3;TUG1;RC3H2;LZTFL1;DCTD;SNHG14;RUFY3;UBE2V2;HECA;XPR1;ATP6V1A;DNMT1;BHLHB9;MYCBP2;GMPS;SLC1A2;NEDD4L;PIK3R1;PDS5B;RASAL2;PLA2G6;GIGYF2;EPB41L5;LARP1;MAP2;PRKAR2A;RAD21;ZMAT4;DPH3;G3BP2;MAP4;DECR2;RIMKLB;RAB6B;LONRF2;KLHDC10;GSTM3;UB…
Genes Up-Regulated In Expression In Ctip2 Null Vs WT Mouse Striatum GSE9330	HDSigDB 2021	Union of DiestVMaleAccent3 and EstVMaleAccent3 (female low/KO downreg, male high/KO upreg)	153	1203	9.98225e-22	2.74352	4.09993e-23	141.424	OXNAD1;AHCYL1;TRIO;TRRAP;NEXMIF;FMR1;PRDM2;YY1;RIMS1;SESN3;DPYSL5;ZMIZ1;DPYSL3;LUC7L;TNR;PLS3;PLXNC1;RGS8;SOX6;GLUL;PKNOX2;MAP3K5;NSF;PHYH;EIF1AX;TMOD2;ANK2;SOX11;ANK3;TUG1;RC3H2;LZTFL1;DCTD;SNHG14;RUFY3;UBE2V2;HECA;XPR1;ATP6V1A;DNMT1;BHLHB9;MYCBP2;GMPS;SLC1A2;NEDD4L;PIK3R1;PDS5B;RASAL2;PLA2G6;GIGYF2;EPB41L5;LARP1;MAP2;PRKAR2A;RAD21;ZMAT4;DPH3;G3BP2;MAP4;DECR2;RIMKLB;RAB6B;LONRF2;KLHDC10;GSTM3;UB…
Genes Changed In dSPNs Of HdhQ170 Vs HdhQ20 PMID32681824	HDSigDB 2021	DiestVMaleAccent1 (Diestrus vs Male, female high/KO upreg, male low/KO downreg)	132	966	2.2489e-21	2.95068	9.33396e-23	149.676	CYFIP2;NCKAP1;RIPOR1;AHCYL1;UBXN2B;DGKB;WIPF2;CTNND2;DCAF6;TATDN1;SYNGAP1;SESN3;ZMIZ1;PPP4R4;DPYSL3;PDE8B;CALN1;PPP1R16B;PRKCI;PHYH;EIF1AX;RALGAPA1;TMOD2;SOX11;HPCAL4;BCR;STX1B;RUFY3;GPD1;SIK3;SREK1;ATF6;JCAD;NECAB1;MEAF6;KMT2A;MAOB;MAGED1;AGAP2;NEDD4L;FOXO3;NDRG2;ATXN1;ZMAT4;ABL2;SRGAP3;SOCS7;RAB6B;HSPA8;EGR2;GSTM1;EGR3;HOMER1;NEBL;DSTN;TMEM196;DCLK1;FOSL2;ARHGAP33;ARHGAP32;DLG2;AGO4;AGO2;BCL2;G…
Genes Changed In dSPNs Of HdhQ170 Vs HdhQ20 PMID32681824	HDSigDB 2021	Union of DiestVMaleAccent3 and EstVMaleAccent3 (female low/KO downreg, male high/KO upreg)	132	966	2.2489e-21	2.95068	9.33396e-23	149.676	CYFIP2;NCKAP1;RIPOR1;AHCYL1;UBXN2B;DGKB;WIPF2;CTNND2;DCAF6;TATDN1;SYNGAP1;SESN3;ZMIZ1;PPP4R4;DPYSL3;PDE8B;CALN1;PPP1R16B;PRKCI;PHYH;EIF1AX;RALGAPA1;TMOD2;SOX11;HPCAL4;BCR;STX1B;RUFY3;GPD1;SIK3;SREK1;ATF6;JCAD;NECAB1;MEAF6;KMT2A;MAOB;MAGED1;AGAP2;NEDD4L;FOXO3;NDRG2;ATXN1;ZMAT4;ABL2;SRGAP3;SOCS7;RAB6B;HSPA8;EGR2;GSTM1;EGR3;HOMER1;NEBL;DSTN;TMEM196;DCLK1;FOSL2;ARHGAP33;ARHGAP32;DLG2;AGO4;AGO2;BCL2;G…
Genes Down-Regulated In Expression In Cerebellum Of 12 Mon Ataxin-2 KO Spinocerebellar Ataxia 2 Mice GSE55177	HDSigDB 2021	DiestVMaleAccent1 (Diestrus vs Male, female high/KO upreg, male low/KO downreg)	224	2125	2.34147e-21	2.28383	9.81939e-23	115.733	CHIC1;GMFB;PANK3;WIPF2;ALKBH5;DPYSL3;CDK5RAP1;LUC7L;AGFG1;SOX5;MEF2A;UNC13C;PRKAB2;MEF2C;PHKA1;RC3H2;UHMK1;AR;SNHG14;MARF1;RUFY3;TCEANC2;SUCLG2;TMEM126B;ALDH7A1;NECAB1;SDC4;MYCBP2;DCUN1D1;NOLC1;NEDD4L;PIK3R1;TTBK2;PRKAR2A;DECR2;RIMKLB;ARGLU1;SCAI;SRPK2;CREBBP;HOMER1;HOMER2;TIPARP;INTS2;EXOC6B;PRRC2C;IRF2BP2;HSPA12A;PUM1;MED13L;AGO2;ECHDC1;FXYD6;CDK12;CPEB2;CPEB4;SMG1;AHCTF1;BTG1;CDKN1B;HIP1;CLTC;…
Genes Down-Regulated In Expression In Cerebellum Of 12 Mon Ataxin-2 KO Spinocerebellar Ataxia 2 Mice GSE55177	HDSigDB 2021	Union of DiestVMaleAccent3 and EstVMaleAccent3 (female low/KO downreg, male high/KO upreg)	224	2125	2.34147e-21	2.28383	9.81939e-23	115.733	CHIC1;GMFB;PANK3;WIPF2;ALKBH5;DPYSL3;CDK5RAP1;LUC7L;AGFG1;SOX5;MEF2A;UNC13C;PRKAB2;MEF2C;PHKA1;RC3H2;UHMK1;AR;SNHG14;MARF1;RUFY3;TCEANC2;SUCLG2;TMEM126B;ALDH7A1;NECAB1;SDC4;MYCBP2;DCUN1D1;NOLC1;NEDD4L;PIK3R1;TTBK2;PRKAR2A;DECR2;RIMKLB;ARGLU1;SCAI;SRPK2;CREBBP;HOMER1;HOMER2;TIPARP;INTS2;EXOC6B;PRRC2C;IRF2BP2;HSPA12A;PUM1;MED13L;AGO2;ECHDC1;FXYD6;CDK12;CPEB2;CPEB4;SMG1;AHCTF1;BTG1;CDKN1B;HIP1;CLTC;…
Genes Up-Regulated In iSPNs Of 6 Mon HdhQ170 Vs HdhQ20 PMID32681824	HDSigDB 2021	DiestVMaleAccent1 (Diestrus vs Male, female high/KO upreg, male low/KO downreg)	224	2126	2.46452e-21	2.2825	1.0442e-22	115.525	ITSN2;CHIC1;PANK3;SPARC;IKZF2;DPYSL3;GLUL;PRKAB2;OXSM;FRS2;PHKA1;SOX11;THAP2;UHMK1;SNHG14;PPP1R3C;XRN1;RUFY3;ATF7;MAOB;EPAS1;PDE1A;MYCBP2;PIK3R1;MTMR4;LARP1;PRKAR2A;RAD21;DHX36;GSTM1;HOMER2;TIPARP;EDEM1;INTS2;EXOC6B;IRF2BP2;GNG12;PHC3;ST18;PUM2;CCDC88A;EHD3;SLC6A8;ANP32E;CPEB2;GSTM5;CPEB4;PYGB;BTG1;CDKN1B;PHF20;CITED2;TGFB1I1;SNX12;TFCP2L1;CROT;FMN2;ZCCHC18;ARHGAP5;NIPBL;NHSL1;NKRF;REV3L;IDS;TEAD…
Genes Up-Regulated In iSPNs Of 6 Mon HdhQ170 Vs HdhQ20 PMID32681824	HDSigDB 2021	Union of DiestVMaleAccent3 and EstVMaleAccent3 (female low/KO downreg, male high/KO upreg)	224	2126	2.46452e-21	2.2825	1.0442e-22	115.525	ITSN2;CHIC1;PANK3;SPARC;IKZF2;DPYSL3;GLUL;PRKAB2;OXSM;FRS2;PHKA1;SOX11;THAP2;UHMK1;SNHG14;PPP1R3C;XRN1;RUFY3;ATF7;MAOB;EPAS1;PDE1A;MYCBP2;PIK3R1;MTMR4;LARP1;PRKAR2A;RAD21;DHX36;GSTM1;HOMER2;TIPARP;EDEM1;INTS2;EXOC6B;IRF2BP2;GNG12;PHC3;ST18;PUM2;CCDC88A;EHD3;SLC6A8;ANP32E;CPEB2;GSTM5;CPEB4;PYGB;BTG1;CDKN1B;PHF20;CITED2;TGFB1I1;SNX12;TFCP2L1;CROT;FMN2;ZCCHC18;ARHGAP5;NIPBL;NHSL1;NKRF;REV3L;IDS;TEAD…
Genes Up-Regulated In Pvalb/Th-expressing Interneurons Of HD Patients Vs Control PMID32681824	HDSigDB 2021	DiestVMaleAccent1 (Diestrus vs Male, female high/KO upreg, male low/KO downreg)	105	672	2.92749e-21	3.40845	1.25301e-22	171.893	ITSN2;DGKG;RAB3C;TRIO;CTNND2;ARHGAP35;RGS5;SESN3;PLCE1;PLS3;TNR;PLXNC1;SOX6;PKNOX2;CALN1;SOX5;PPP1R16B;UNC13C;MEF2C;LMO3;MAGI2;RFX3;ANK2;MMD2;ANK3;TBL1XR1;ZFPM2;INO80D;SHC3;BHLHB9;GLIS3;TMTC1;FOXO3;NDRG2;MED12L;ATXN1;MAP2;ZMAT4;SRGAP3;LRRC4C;SCAI;RAP1GAP2;UBE2H;DTNA;HOMER1;RAB27B;KLHL24;HSPA12A;ARHGAP26;PBX1;FAM135B;PEX5L;DLG2;GNAL;MYO5B;GNAQ;BCL2;NF1;TCF4;PAM;SFXN5;CPEB4;PICALM;RERE;CSRNP3;HIP1;…
Genes Up-Regulated In Pvalb/Th-expressing Interneurons Of HD Patients Vs Control PMID32681824	HDSigDB 2021	Union of DiestVMaleAccent3 and EstVMaleAccent3 (female low/KO downreg, male high/KO upreg)	105	672	2.92749e-21	3.40845	1.25301e-22	171.893	ITSN2;DGKG;RAB3C;TRIO;CTNND2;ARHGAP35;RGS5;SESN3;PLCE1;PLS3;TNR;PLXNC1;SOX6;PKNOX2;CALN1;SOX5;PPP1R16B;UNC13C;MEF2C;LMO3;MAGI2;RFX3;ANK2;MMD2;ANK3;TBL1XR1;ZFPM2;INO80D;SHC3;BHLHB9;GLIS3;TMTC1;FOXO3;NDRG2;MED12L;ATXN1;MAP2;ZMAT4;SRGAP3;LRRC4C;SCAI;RAP1GAP2;UBE2H;DTNA;HOMER1;RAB27B;KLHL24;HSPA12A;ARHGAP26;PBX1;FAM135B;PEX5L;DLG2;GNAL;MYO5B;GNAQ;BCL2;NF1;TCF4;PAM;SFXN5;CPEB4;PICALM;RERE;CSRNP3;HIP1;…
Top Astrocyte-Enriched Genes In Humans And Mice PMID29892006	HDSigDB 2021	DiestVMaleAccent1 (Diestrus vs Male, female high/KO upreg, male low/KO downreg)	134	1000	6.03915e-21	2.88555	2.61096e-22	143.404	ALDH1L1;CHIC1;AHCYL1;DGKB;CTNND2;FAM107A;ABAT;RORB;IKZF2;FGF1;AMOT;PREX2;PTAR1;SESN3;SOX6;GLUL;SOX5;PAQR8;S100A1;ACOT11;TMOD2;MAGI2;DIO2;RFX3;PHKA1;ANK2;MMD2;ASRGL1;KCTD6;PPP1R3C;LIX1;ELMO2;ALDH7A1;MTMR1;LXN;SDC4;ARHGEF26;ABHD4;MAOB;CEP85L;GLIS3;SLC1A2;NDRG2;FUT9;NDP;SRGAP3;RIMKLB;GSTM3;GSTM1;DTNA;NEBL;IDH1;HSPA2;GNG12;PRDX6;PBX1;DCLK1;ARHGAP32;FAM163A;PXMP2;KYAT3;BCL2;SPIRE1;FGFR3;SFXN5;PYGB;THR…
Top Astrocyte-Enriched Genes In Humans And Mice PMID29892006	HDSigDB 2021	Union of DiestVMaleAccent3 and EstVMaleAccent3 (female low/KO downreg, male high/KO upreg)	134	1000	6.03915e-21	2.88555	2.61096e-22	143.404	ALDH1L1;CHIC1;AHCYL1;DGKB;CTNND2;FAM107A;ABAT;RORB;IKZF2;FGF1;AMOT;PREX2;PTAR1;SESN3;SOX6;GLUL;SOX5;PAQR8;S100A1;ACOT11;TMOD2;MAGI2;DIO2;RFX3;PHKA1;ANK2;MMD2;ASRGL1;KCTD6;PPP1R3C;LIX1;ELMO2;ALDH7A1;MTMR1;LXN;SDC4;ARHGEF26;ABHD4;MAOB;CEP85L;GLIS3;SLC1A2;NDRG2;FUT9;NDP;SRGAP3;RIMKLB;GSTM3;GSTM1;DTNA;NEBL;IDH1;HSPA2;GNG12;PRDX6;PBX1;DCLK1;ARHGAP32;FAM163A;PXMP2;KYAT3;BCL2;SPIRE1;FGFR3;SFXN5;PYGB;THR…
Genes Up-Regulated In OPCs Of HD Patients Vs Control PMID32681824	HDSigDB 2021	DiestVMaleAccent1 (Diestrus vs Male, female high/KO upreg, male low/KO downreg)	78	414	1.12341e-20	4.21238	4.90552e-22	206.687	DGKG;CSRNP3;HIP1;DGKB;CTNND2;ABAT;FMN2;ARHGAP35;PITPNC1;SYNE1;PREX2;DOCK10;DPYSL5;ZMIZ1;TRIM2;CHORDC1;PHACTR3;TNR;STK32B;ARFGEF3;MAP3K5;CALN1;SOX5;ZCCHC24;ZHX3;SGIP1;MAGI2;RFX3;ANK2;MMD2;ASH1L;BCR;MMP16;PIK3CA;TBL1XR1;SIK3;LCOR;PKP4;FAM193A;ZFPM2;RIN2;MGLL;RAPGEF4;HDAC4;GRAMD1B;INO80D;ANKRD55;SLC1A2;NDRG2;PDS5A;ATXN1;MAP2;FUT9;SNTG1;GNG7;UBR5;LRRC4C;CLASP1;SASH1;RFTN2;SPECC1;CREBBP;KCNIP3;PRRC2C;…
Genes Up-Regulated In OPCs Of HD Patients Vs Control PMID32681824	HDSigDB 2021	Union of DiestVMaleAccent3 and EstVMaleAccent3 (female low/KO downreg, male high/KO upreg)	78	414	1.12341e-20	4.21238	4.90552e-22	206.687	DGKG;CSRNP3;HIP1;DGKB;CTNND2;ABAT;FMN2;ARHGAP35;PITPNC1;SYNE1;PREX2;DOCK10;DPYSL5;ZMIZ1;TRIM2;CHORDC1;PHACTR3;TNR;STK32B;ARFGEF3;MAP3K5;CALN1;SOX5;ZCCHC24;ZHX3;SGIP1;MAGI2;RFX3;ANK2;MMD2;ASH1L;BCR;MMP16;PIK3CA;TBL1XR1;SIK3;LCOR;PKP4;FAM193A;ZFPM2;RIN2;MGLL;RAPGEF4;HDAC4;GRAMD1B;INO80D;ANKRD55;SLC1A2;NDRG2;PDS5A;ATXN1;MAP2;FUT9;SNTG1;GNG7;UBR5;LRRC4C;CLASP1;SASH1;RFTN2;SPECC1;CREBBP;KCNIP3;PRRC2C;…
Genes Changed In WT Treated With PLX3397 Vs Control GSE136158	HDSigDB 2021	DiestVMaleAccent1 (Diestrus vs Male, female high/KO upreg, male low/KO downreg)	278	2912	1.28211e-20	2.08585	5.65392e-22	102.049	CHIC1;PANK3;SPARC;FRMPD4;NEXMIF;KANTR;IKZF2;ACTB;ALKBH8;PREX2;PPP2R1A;CDK5RAP1;SOX6;AGFG1;UNC13C;RFX3;ANK2;ANK3;RC3H2;MTURN;UHMK1;MOSMO;AR;SNHG14;XRN1;PAPPA;RELCH;HECA;KCTD12;CLOCK;NECAB1;CEP85L;MYCBP2;SLAIN2;PIK3R1;NYAP2;MED12L;TTBK2;MAP2;PRKAR2A;STXBP5;SCAI;GSTM3;FZD3;GSTM1;NEBL;HOMER2;INTS2;IQSEC3;PRRC2C;RAB27B;GNG12;PHC3;PRDX6;ACADSB;ST18;PUM2;FAM135B;AGO3;CPEB2;CDK14;GSTM5;CPEB4;SMG1;CSRNP3;…
Genes Changed In WT Treated With PLX3397 Vs Control GSE136158	HDSigDB 2021	Union of DiestVMaleAccent3 and EstVMaleAccent3 (female low/KO downreg, male high/KO upreg)	278	2912	1.28211e-20	2.08585	5.65392e-22	102.049	CHIC1;PANK3;SPARC;FRMPD4;NEXMIF;KANTR;IKZF2;ACTB;ALKBH8;PREX2;PPP2R1A;CDK5RAP1;SOX6;AGFG1;UNC13C;RFX3;ANK2;ANK3;RC3H2;MTURN;UHMK1;MOSMO;AR;SNHG14;XRN1;PAPPA;RELCH;HECA;KCTD12;CLOCK;NECAB1;CEP85L;MYCBP2;SLAIN2;PIK3R1;NYAP2;MED12L;TTBK2;MAP2;PRKAR2A;STXBP5;SCAI;GSTM3;FZD3;GSTM1;NEBL;HOMER2;INTS2;IQSEC3;PRRC2C;RAB27B;GNG12;PHC3;PRDX6;ACADSB;ST18;PUM2;FAM135B;AGO3;CPEB2;CDK14;GSTM5;CPEB4;SMG1;CSRNP3;…
Genes Down-Regulated In Nortriptyline Treated STHdhQ111 Vs Control GSE129143	HDSigDB 2021	DiestVMaleAccent1 (Diestrus vs Male, female high/KO upreg, male low/KO downreg)	65	303	2.59021e-20	4.91939	1.15344e-21	237.172	ITSN2;CYFIP1;NCKAP1;PYGB;PANK3;DGKD;UBE3C;LRRK2;USP34;IPP;OSBPL11;AFF4;SH3RF1;ARHGAP35;DSTYK;GNPTAB;ERC2;TNPO1;SPTAN1;COA5;NCOA2;ZYG11B;PCYT1A;ARHGEF12;NCOA3;VPS13C;VPS13D;MRTFB;RBSN;CKAP5;BCR;TANC1;ARMCX2;RALGAPB;ALS2;TRAF3;CTDSP2;PKP4;SFT2D2;ANAPC1;XPR1;MTMR1;CLEC16A;SLAIN2;KIF3B;TNKS2;PRKAR2A;UBN1;ABL2;EIF4EBP2;ANKRD52;KLHDC10;EDEM1;SEC16A;HUWE1;OGA;AP2B1;USF3;MED13L;DIAPH1;CNOT1;AGO1;AGO2;CDK…
Genes Down-Regulated In Nortriptyline Treated STHdhQ111 Vs Control GSE129143	HDSigDB 2021	Union of DiestVMaleAccent3 and EstVMaleAccent3 (female low/KO downreg, male high/KO upreg)	65	303	2.59021e-20	4.91939	1.15344e-21	237.172	ITSN2;CYFIP1;NCKAP1;PYGB;PANK3;DGKD;UBE3C;LRRK2;USP34;IPP;OSBPL11;AFF4;SH3RF1;ARHGAP35;DSTYK;GNPTAB;ERC2;TNPO1;SPTAN1;COA5;NCOA2;ZYG11B;PCYT1A;ARHGEF12;NCOA3;VPS13C;VPS13D;MRTFB;RBSN;CKAP5;BCR;TANC1;ARMCX2;RALGAPB;ALS2;TRAF3;CTDSP2;PKP4;SFT2D2;ANAPC1;XPR1;MTMR1;CLEC16A;SLAIN2;KIF3B;TNKS2;PRKAR2A;UBN1;ABL2;EIF4EBP2;ANKRD52;KLHDC10;EDEM1;SEC16A;HUWE1;OGA;AP2B1;USF3;MED13L;DIAPH1;CNOT1;AGO1;AGO2;CDK…
Expression In Skeletal Muscle Of HSALR 20B Myotonic Dystrophy Mice GSE24920	HDSigDB 2021	DiestVMaleAccent1 (Diestrus vs Male, female high/KO upreg, male low/KO downreg)	352	4034	3.07798e-20	1.94225	1.38396e-21	93.2852	NCKAP1;TRIO;MTRR;PLEKHB2;ZFYVE9;WIPF2;NUDT5;ALKBH8;UBE2L3;DCAF6;RPS6KA3;ALKBH5;ZMIZ1;SOX6;MED1;UNC13C;PRKAB2;PRKCI;PHKA1;ANK2;SOX11;ANK3;RC3H2;ASRGL1;AR;PPP1R3C;RUFY3;TMEM126B;ZFPM2;TMEM87A;MAOB;STXBP4;DCUN1D1;MTMR9;NOLC1;NEDD4L;BAZ2A;TMTC1;PIK3R1;MTMR4;PLA2G6;SMIM7;TTBK2;EPB41L5;LARP1;MAP2;PRKAR2A;DHX36;DPH3;STXBP5;MAP4;SCAI;SRPK2;GSTM3;CREBBP;GSTM1;DTNA;HOMER1;HOMER2;EDEM1;ACADSB;PUM2;CCDC88A;P…
Expression In Skeletal Muscle Of HSALR 20B Myotonic Dystrophy Mice GSE24920	HDSigDB 2021	Union of DiestVMaleAccent3 and EstVMaleAccent3 (female low/KO downreg, male high/KO upreg)	352	4034	3.07798e-20	1.94225	1.38396e-21	93.2852	NCKAP1;TRIO;MTRR;PLEKHB2;ZFYVE9;WIPF2;NUDT5;ALKBH8;UBE2L3;DCAF6;RPS6KA3;ALKBH5;ZMIZ1;SOX6;MED1;UNC13C;PRKAB2;PRKCI;PHKA1;ANK2;SOX11;ANK3;RC3H2;ASRGL1;AR;PPP1R3C;RUFY3;TMEM126B;ZFPM2;TMEM87A;MAOB;STXBP4;DCUN1D1;MTMR9;NOLC1;NEDD4L;BAZ2A;TMTC1;PIK3R1;MTMR4;PLA2G6;SMIM7;TTBK2;EPB41L5;LARP1;MAP2;PRKAR2A;DHX36;DPH3;STXBP5;MAP4;SCAI;SRPK2;GSTM3;CREBBP;GSTM1;DTNA;HOMER1;HOMER2;EDEM1;ACADSB;PUM2;CCDC88A;P…
Genes Up-Regulated In Secretory Ependymal Cells Of R6/2 Vs WT PMID32681824	HDSigDB 2021	DiestVMaleAccent1 (Diestrus vs Male, female high/KO upreg, male low/KO downreg)	70	348	3.27955e-20	4.54776	1.48877e-21	218.094	ITSN2;PHF3;RERE;SMG1;TRIO;THRB;USP32;CTNND2;USP34;LYST;ACTB;PITPNC1;SYNE1;NIPBL;FSD1L;KPNA4;ARIH1;SOX5;PCMTD1;KPNA1;KDM6A;MEF2A;ARHGEF12;RALGAPA1;VPS13A;ASH1L;NCOR1;TRAF3;RUFY3;SIK3;EXOC4;SREK1;GAS7;GRAMD1B;MAOB;ROCK1;STAU2;KMT2C;MYCBP2;ANKRD12;GLIS3;PDS5B;PPM1E;STRN3;UBR5;TRA2A;LRRC4C;CLASP2;SRPK2;HSPA8;TCF7L2;CEP350;EXOC6B;SORBS2;HOOK3;PUM1;CDC42BPA;PHC3;CNOT4;AGBL4;DIAPH2;DLG2;FMNL2;NFIA;NBEA;…
Genes Up-Regulated In Secretory Ependymal Cells Of R6/2 Vs WT PMID32681824	HDSigDB 2021	Union of DiestVMaleAccent3 and EstVMaleAccent3 (female low/KO downreg, male high/KO upreg)	70	348	3.27955e-20	4.54776	1.48877e-21	218.094	ITSN2;PHF3;RERE;SMG1;TRIO;THRB;USP32;CTNND2;USP34;LYST;ACTB;PITPNC1;SYNE1;NIPBL;FSD1L;KPNA4;ARIH1;SOX5;PCMTD1;KPNA1;KDM6A;MEF2A;ARHGEF12;RALGAPA1;VPS13A;ASH1L;NCOR1;TRAF3;RUFY3;SIK3;EXOC4;SREK1;GAS7;GRAMD1B;MAOB;ROCK1;STAU2;KMT2C;MYCBP2;ANKRD12;GLIS3;PDS5B;PPM1E;STRN3;UBR5;TRA2A;LRRC4C;CLASP2;SRPK2;HSPA8;TCF7L2;CEP350;EXOC6B;SORBS2;HOOK3;PUM1;CDC42BPA;PHC3;CNOT4;AGBL4;DIAPH2;DLG2;FMNL2;NFIA;NBEA;…
Genes Changed In Corticostriatal Projection Neurons Of R6/2 Vs WT PMID32681824	HDSigDB 2021	DiestVMaleAccent1 (Diestrus vs Male, female high/KO upreg, male low/KO downreg)	174	1510	3.50891e-20	2.46753	1.60806e-21	118.143	OTUD4;CYFIP2;CCDC71L;RAB3C;ALDH1L1;RIPOR1;GMFB;MTRR;GDA;FMR1;OGDHL;RORB;FGF1;IPO5;RIMS1;RPS6KA3;SYNGAP1;DPYSL5;GPBP1;SCMH1;SLC16A7;EP300;PLCE1;RGS8;PDE8B;GLUL;FAM81A;MAP3K5;CALN1;MED1;MEF2C;TMOD2;MAGI2;MMD2;ANK2;SOX11;KCTD6;PYGO1;STX1B;TBL1XR1;EEF1A2;GPD1;UBE2V2;ATF6;JCAD;ARHGEF26;ABHD4;ABHD2;PDE1A;LYPD1;AGAP2;LIN7A;PIK3R1;RASAL2;NYAP2;FOXO3;SMIM7;MACROH2A1;PLCXD2;ARHGAP12;GOLGA7B;ATXN1;FUT9;BTBD…
Genes Changed In Corticostriatal Projection Neurons Of R6/2 Vs WT PMID32681824	HDSigDB 2021	Union of DiestVMaleAccent3 and EstVMaleAccent3 (female low/KO downreg, male high/KO upreg)	174	1510	3.50891e-20	2.46753	1.60806e-21	118.143	OTUD4;CYFIP2;CCDC71L;RAB3C;ALDH1L1;RIPOR1;GMFB;MTRR;GDA;FMR1;OGDHL;RORB;FGF1;IPO5;RIMS1;RPS6KA3;SYNGAP1;DPYSL5;GPBP1;SCMH1;SLC16A7;EP300;PLCE1;RGS8;PDE8B;GLUL;FAM81A;MAP3K5;CALN1;MED1;MEF2C;TMOD2;MAGI2;MMD2;ANK2;SOX11;KCTD6;PYGO1;STX1B;TBL1XR1;EEF1A2;GPD1;UBE2V2;ATF6;JCAD;ARHGEF26;ABHD4;ABHD2;PDE1A;LYPD1;AGAP2;LIN7A;PIK3R1;RASAL2;NYAP2;FOXO3;SMIM7;MACROH2A1;PLCXD2;ARHGAP12;GOLGA7B;ATXN1;FUT9;BTBD…
Influence Of Hdac4 Reduction On Expression In 15 Wk WT Mice GSE38219	HDSigDB 2021	DiestVMaleAccent1 (Diestrus vs Male, female high/KO upreg, male low/KO downreg)	282	2994	4.13603e-20	2.05514	1.91334e-21	98.0415	ITSN2;CHIC1;NEXMIF;WIPF2;ARAF;IPP;KANTR;KLHDC7A;UBE2L3;DCAF6;RNF114;SCP2;ZMIZ1;CIAO2A;GLUL;AGFG1;SOX5;PAQR8;MED1;PRKAB2;MEF2C;OXSM;MRTFB;RC3H2;AR;STX1B;MARF1;PPP1R3C;XRN2;SUCLG2;RELCH;HECA;TMEM126B;KCTD12;SMIM3;MTMR1;SET;MEAF6;MYCBP2;DCUN1D1;NEDD4L;MTMR4;PRKAR2A;RAD21;MCMBP;RIMKLB;CREBBP;EGR2;GSTM1;HOMER1;INTS2;RAB27B;GNG12;PBX1;DCLK1;PUM2;CCDC88A;FAM135B;SLC6A8;AGO3;NMT1;ECHDC1;CDK12;CPEB2;CDK14…
Influence Of Hdac4 Reduction On Expression In 15 Wk WT Mice GSE38219	HDSigDB 2021	Union of DiestVMaleAccent3 and EstVMaleAccent3 (female low/KO downreg, male high/KO upreg)	282	2994	4.13603e-20	2.05514	1.91334e-21	98.0415	ITSN2;CHIC1;NEXMIF;WIPF2;ARAF;IPP;KANTR;KLHDC7A;UBE2L3;DCAF6;RNF114;SCP2;ZMIZ1;CIAO2A;GLUL;AGFG1;SOX5;PAQR8;MED1;PRKAB2;MEF2C;OXSM;MRTFB;RC3H2;AR;STX1B;MARF1;PPP1R3C;XRN2;SUCLG2;RELCH;HECA;TMEM126B;KCTD12;SMIM3;MTMR1;SET;MEAF6;MYCBP2;DCUN1D1;NEDD4L;MTMR4;PRKAR2A;RAD21;MCMBP;RIMKLB;CREBBP;EGR2;GSTM1;HOMER1;INTS2;RAB27B;GNG12;PBX1;DCLK1;PUM2;CCDC88A;FAM135B;SLC6A8;AGO3;NMT1;ECHDC1;CDK12;CPEB2;CDK14…
Genes Up-Regulated In Chat-expressing Interneurons Of R6/2 Vs WT PMID32681824	HDSigDB 2021	DiestVMaleAccent1 (Diestrus vs Male, female high/KO upreg, male low/KO downreg)	91	551	4.70236e-20	3.6116	2.19565e-21	171.796	RAB3C;TOP2B;SETD2;CSRNP3;FRMPD4;RASGRF1;ARAF;UBE3A;OSBPL11;PPP1R9A;BICD1;CDC73;SH3RF1;ARHGAP35;DCAF6;SYNE1;MED13;ATCAY;TRIM2;REV3L;SLC16A7;UNC13C;ARHGEF12;RALGAPA1;MAGI2;VPS13D;ZFR;DYRK1A;ASH1L;PJA2;DNAJC1;NCOR1;ZEB1;RALGAPB;PIK3CA;LIX1;DOK6;SIK3;LCOR;FAM193A;ZFPM2;PAFAH1B1;HDAC4;SHC3;CUL5;STXBP4;SLC1A2;MTMR9;LIN7A;PDS5A;CBL;PPM1E;GIGYF2;ARHGAP12;CAMSAP2;STRN3;BTAF1;BTBD3;TRA2A;REPS2;RICTOR;LRRC4…
Genes Up-Regulated In Chat-expressing Interneurons Of R6/2 Vs WT PMID32681824	HDSigDB 2021	Union of DiestVMaleAccent3 and EstVMaleAccent3 (female low/KO downreg, male high/KO upreg)	91	551	4.70236e-20	3.6116	2.19565e-21	171.796	RAB3C;TOP2B;SETD2;CSRNP3;FRMPD4;RASGRF1;ARAF;UBE3A;OSBPL11;PPP1R9A;BICD1;CDC73;SH3RF1;ARHGAP35;DCAF6;SYNE1;MED13;ATCAY;TRIM2;REV3L;SLC16A7;UNC13C;ARHGEF12;RALGAPA1;MAGI2;VPS13D;ZFR;DYRK1A;ASH1L;PJA2;DNAJC1;NCOR1;ZEB1;RALGAPB;PIK3CA;LIX1;DOK6;SIK3;LCOR;FAM193A;ZFPM2;PAFAH1B1;HDAC4;SHC3;CUL5;STXBP4;SLC1A2;MTMR9;LIN7A;PDS5A;CBL;PPM1E;GIGYF2;ARHGAP12;CAMSAP2;STRN3;BTAF1;BTBD3;TRA2A;REPS2;RICTOR;LRRC4…
Down-regulated Genes In Hippocampus Of 10 Mon HD Q175 Mice Vs Q20 GSE73503	HDSigDB 2021	DiestVMaleAccent1 (Diestrus vs Male, female high/KO upreg, male low/KO downreg)	119	855	6.85681e-20	2.99051	3.23127e-21	141.096	GMFB;AHCYL1;SPARC;UBXN2B;FAM107A;ABAT;DCAF6;PREX2;PPP4R4;CDK5RAP1;PLS3;RGS8;GLUL;PAQR8;NSF;RALGAPA1;MAGI2;RFX3;MMD2;ASRGL1;KCTD6;STX1B;TANC1;GPD1;SMS;ELMO2;ATF6;MTMR1;ARHGEF26;GLIS3;SLC1A2;RASAL2;IQGAP2;NDRG2;ARHGAP12;BTBD3;TPPP;RAB6B;GSTM3;GSTM1;HOMER1;NEBL;IQSEC3;OGA;FOXN2;PRDX6;DCLK1;ST18;CNOT4;EHD3;SLC6A8;DLG2;MYO5B;GNAQ;NMT1;SPIRE1;ACO2;RGL1;EZH1;SFXN5;GSTM5;CDK16;PYGB;DUSP18;LYST;ELAVL1;PIT…
Down-regulated Genes In Hippocampus Of 10 Mon HD Q175 Mice Vs Q20 GSE73503	HDSigDB 2021	Union of DiestVMaleAccent3 and EstVMaleAccent3 (female low/KO downreg, male high/KO upreg)	119	855	6.85681e-20	2.99051	3.23127e-21	141.096	GMFB;AHCYL1;SPARC;UBXN2B;FAM107A;ABAT;DCAF6;PREX2;PPP4R4;CDK5RAP1;PLS3;RGS8;GLUL;PAQR8;NSF;RALGAPA1;MAGI2;RFX3;MMD2;ASRGL1;KCTD6;STX1B;TANC1;GPD1;SMS;ELMO2;ATF6;MTMR1;ARHGEF26;GLIS3;SLC1A2;RASAL2;IQGAP2;NDRG2;ARHGAP12;BTBD3;TPPP;RAB6B;GSTM3;GSTM1;HOMER1;NEBL;IQSEC3;OGA;FOXN2;PRDX6;DCLK1;ST18;CNOT4;EHD3;SLC6A8;DLG2;MYO5B;GNAQ;NMT1;SPIRE1;ACO2;RGL1;EZH1;SFXN5;GSTM5;CDK16;PYGB;DUSP18;LYST;ELAVL1;PIT…
Genes Changed In Cysteamine Treated STHdhQ111 Vs Control GSE129143	HDSigDB 2021	DiestVMaleAccent1 (Diestrus vs Male, female high/KO upreg, male low/KO downreg)	96	607	8.25358e-20	3.43731	3.92518e-21	161.508	CYFIP1;GSK3B;KDM5C;BTG1;HIP1;UBE3C;USP31;TRRAP;USP32;LRRK2;USP34;ARRB1;CROT;PRL;OSBPL11;LYST;AFF4;SH3RF1;ARHGAP35;DUSP11;DSTYK;PTAR1;GNPTAB;KPNA6;PPFIA1;HMG20A;ERC2;TNPO1;SPTAN1;COA5;ARHGEF11;NCOA2;ZYG11B;PCYT1A;ARHGEF12;VPS13C;NCOA3;VPS13D;RBSN;ZHX1;UHMK1;BCR;TANC1;ILF3;RALGAPB;TRAF3;CTDSP2;LCOR;PKP4;SFT2D2;B4GALT6;ANAPC1;MTMR1;ANKRD12;CLEC16A;HTT;SLAIN2;STK4;PRR14L;KIF3B;UBR5;ABL2;ANKRD52;CLASP…
Genes Changed In Cysteamine Treated STHdhQ111 Vs Control GSE129143	HDSigDB 2021	Union of DiestVMaleAccent3 and EstVMaleAccent3 (female low/KO downreg, male high/KO upreg)	96	607	8.25358e-20	3.43731	3.92518e-21	161.508	CYFIP1;GSK3B;KDM5C;BTG1;HIP1;UBE3C;USP31;TRRAP;USP32;LRRK2;USP34;ARRB1;CROT;PRL;OSBPL11;LYST;AFF4;SH3RF1;ARHGAP35;DUSP11;DSTYK;PTAR1;GNPTAB;KPNA6;PPFIA1;HMG20A;ERC2;TNPO1;SPTAN1;COA5;ARHGEF11;NCOA2;ZYG11B;PCYT1A;ARHGEF12;VPS13C;NCOA3;VPS13D;RBSN;ZHX1;UHMK1;BCR;TANC1;ILF3;RALGAPB;TRAF3;CTDSP2;LCOR;PKP4;SFT2D2;B4GALT6;ANAPC1;MTMR1;ANKRD12;CLEC16A;HTT;SLAIN2;STK4;PRR14L;KIF3B;UBR5;ABL2;ANKRD52;CLASP…
Genes Up-Regulated In Control iPSCs After 60 D Of Differentiation GSE109534	HDSigDB 2021	DiestVMaleAccent1 (Diestrus vs Male, female high/KO upreg, male low/KO downreg)	351	4045	9.02824e-20	1.92635	4.33262e-21	90.323	CYFIP2;TRIO;PANK3;FRMPD4;NEXMIF;IPP;ABAT;MSANTD4;DPYSL5;ZMIZ1;DPYSL3;PLCE1;SOX6;PKNOX2;SOX5;MEF2A;UNC13C;PRKAB2;MEF2C;RFX3;MMD2;ANK2;SOX11;ANK3;HPCAL4;RC3H2;THAP2;MTURN;MOSMO;STX1B;MARF1;XRN1;WDR82;RUFY3;HECA;ZFPM2;ATF6;RIN2;MEAF6;MAGED1;PDE1A;CEP85L;MYCBP2;LYPD1;AGAP2;MTMR9;NEDD4L;PIK3R1;MTMR4;NYAP2;PLA2G6;TTBK2;MAP2;STXBP5;RIMKLB;SCAI;SRPK2;GSTM3;FZD3;DTNA;NEBL;TIPARP;IQSEC3;IRF2BP2;RAB27B;BBIP…
Genes Up-Regulated In Control iPSCs After 60 D Of Differentiation GSE109534	HDSigDB 2021	Union of DiestVMaleAccent3 and EstVMaleAccent3 (female low/KO downreg, male high/KO upreg)	351	4045	9.02824e-20	1.92635	4.33262e-21	90.323	CYFIP2;TRIO;PANK3;FRMPD4;NEXMIF;IPP;ABAT;MSANTD4;DPYSL5;ZMIZ1;DPYSL3;PLCE1;SOX6;PKNOX2;SOX5;MEF2A;UNC13C;PRKAB2;MEF2C;RFX3;MMD2;ANK2;SOX11;ANK3;HPCAL4;RC3H2;THAP2;MTURN;MOSMO;STX1B;MARF1;XRN1;WDR82;RUFY3;HECA;ZFPM2;ATF6;RIN2;MEAF6;MAGED1;PDE1A;CEP85L;MYCBP2;LYPD1;AGAP2;MTMR9;NEDD4L;PIK3R1;MTMR4;NYAP2;PLA2G6;TTBK2;MAP2;STXBP5;RIMKLB;SCAI;SRPK2;GSTM3;FZD3;DTNA;NEBL;TIPARP;IQSEC3;IRF2BP2;RAB27B;BBIP…
Genes Down-Regulated In HDACi-106 Treated PBMCs From Friedreich Ataxia Carriers Vs Controls GSE30933	HDSigDB 2021	DiestVMaleAccent1 (Diestrus vs Male, female high/KO upreg, male low/KO downreg)	202	1891	9.32199e-20	2.28951	4.51389e-21	107.257	NCKAP1;MTRR;WIPF2;CCNC;RPS6KA3;ALKBH5;RNF114;PPP4R4;MED1;PRKCI;MRTFB;ANK3;HPCAL4;RC3H2;THAP2;UHMK1;WDR82;SUCLG2;HECA;CEP85L;MYCBP2;DCUN1D1;PIK3R1;MTMR4;RAD21;MCMBP;MAP4;SRPK2;EGR2;FZD3;TIPARP;INTS2;MED13L;AGO2;KYAT3;PHF3;SMG1;AHCTF1;BTG1;PHF20;CITED2;RSF1;IER3IP1;LYST;PCMTD2;NIPBL;PIP4P2;XPO1;NKRF;REV3L;ARIH1;SPTAN1;LIN52;PCMTD1;UPF2;VAV3;ZYG11B;ZHX3;WDR37;NCOA3;STRBP;TSC22D3;ZFR;TSC22D2;FOS;DUSP…
Genes Down-Regulated In HDACi-106 Treated PBMCs From Friedreich Ataxia Carriers Vs Controls GSE30933	HDSigDB 2021	Union of DiestVMaleAccent3 and EstVMaleAccent3 (female low/KO downreg, male high/KO upreg)	202	1891	9.32199e-20	2.28951	4.51389e-21	107.257	NCKAP1;MTRR;WIPF2;CCNC;RPS6KA3;ALKBH5;RNF114;PPP4R4;MED1;PRKCI;MRTFB;ANK3;HPCAL4;RC3H2;THAP2;UHMK1;WDR82;SUCLG2;HECA;CEP85L;MYCBP2;DCUN1D1;PIK3R1;MTMR4;RAD21;MCMBP;MAP4;SRPK2;EGR2;FZD3;TIPARP;INTS2;MED13L;AGO2;KYAT3;PHF3;SMG1;AHCTF1;BTG1;PHF20;CITED2;RSF1;IER3IP1;LYST;PCMTD2;NIPBL;PIP4P2;XPO1;NKRF;REV3L;ARIH1;SPTAN1;LIN52;PCMTD1;UPF2;VAV3;ZYG11B;ZHX3;WDR37;NCOA3;STRBP;TSC22D3;ZFR;TSC22D2;FOS;DUSP…
Expression In Striatum From 10 Wk HdhQ111 HD Mice GSE19780	HDSigDB 2021	DiestVMaleAccent1 (Diestrus vs Male, female high/KO upreg, male low/KO downreg)	86	507	1.00223e-19	3.71882	4.89635e-21	173.914	GSK3B;SMG1;CDKN1B;PHF20;CITED2;GDA;PTEN;KANTR;TNFAIP1;PITPNC1;SYNE1;RO60;RGS5;TRIM2;KIF5A;PHACTR1;CALN1;MEF2A;NSF;CNOT6L;CAMK1D;RALGAPA1;STRBP;DYNLT3;MRTFB;KCNAB2;ANK3;DUSP8;PHF20L1;MARF1;PIK3CA;DDAH1;GPD1;PKP4;MAPRE2;SLU7;PAFAH1B1;NAPB;SET;NUFIP2;ROCK1;SDC4;MYCBP2;CAMK2A;GMPS;NEDD4L;RASAL2;MTMR4;DNAJC27;GNA13;FAM168A;KCTD20;MAP2;FUT9;DHX36;LRRC4C;RAB6B;ARGLU1;SRPK2;TCAF1;CBX5;CPSF6;TIPARP;PRRC2C…
Expression In Striatum From 10 Wk HdhQ111 HD Mice GSE19780	HDSigDB 2021	Union of DiestVMaleAccent3 and EstVMaleAccent3 (female low/KO downreg, male high/KO upreg)	86	507	1.00223e-19	3.71882	4.89635e-21	173.914	GSK3B;SMG1;CDKN1B;PHF20;CITED2;GDA;PTEN;KANTR;TNFAIP1;PITPNC1;SYNE1;RO60;RGS5;TRIM2;KIF5A;PHACTR1;CALN1;MEF2A;NSF;CNOT6L;CAMK1D;RALGAPA1;STRBP;DYNLT3;MRTFB;KCNAB2;ANK3;DUSP8;PHF20L1;MARF1;PIK3CA;DDAH1;GPD1;PKP4;MAPRE2;SLU7;PAFAH1B1;NAPB;SET;NUFIP2;ROCK1;SDC4;MYCBP2;CAMK2A;GMPS;NEDD4L;RASAL2;MTMR4;DNAJC27;GNA13;FAM168A;KCTD20;MAP2;FUT9;DHX36;LRRC4C;RAB6B;ARGLU1;SRPK2;TCAF1;CBX5;CPSF6;TIPARP;PRRC2C…
Top Microglia-Expressed Genes In Humans And Mice PMID29892006	HDSigDB 2021	DiestVMaleAccent1 (Diestrus vs Male, female high/KO upreg, male low/KO downreg)	131	1000	1.24722e-19	2.80205	6.14713e-21	130.403	CYFIP1;SPARC;PLEKHB2;SLA;ACTB;IPO5;DOCK10;ZMIZ1;GPBP1;KPNA4;ARID2;GLUL;MEF2A;MEF2C;DYRK1A;AP1B1;LARP4B;TUG1;TYROBP;XRN1;XRN2;SELENOP;KCTD12;SREK1;XIST;RIN2;ATP6V1A;SET;MAGED1;KMT2C;MYCBP2;PIK3R1;FOXO3;PDS5A;MED12L;ARHGAP12;ABL2;MAP4;SKIL;ARGLU1;MCL1;HSPA8;CREBBP;EGR2;UBE2H;EGR3;CPSF6;DENND4A;EDEM1;CEP350;OGA;IRF2BP2;PRRC2C;EEF2;PUM1;AZIN1;MED13L;PUM2;NR4A2;CCDC88A;PAN3;GNAQ;NMT1;MDM4;TCF4;EIF4G2;…
Top Microglia-Expressed Genes In Humans And Mice PMID29892006	HDSigDB 2021	Union of DiestVMaleAccent3 and EstVMaleAccent3 (female low/KO downreg, male high/KO upreg)	131	1000	1.24722e-19	2.80205	6.14713e-21	130.403	CYFIP1;SPARC;PLEKHB2;SLA;ACTB;IPO5;DOCK10;ZMIZ1;GPBP1;KPNA4;ARID2;GLUL;MEF2A;MEF2C;DYRK1A;AP1B1;LARP4B;TUG1;TYROBP;XRN1;XRN2;SELENOP;KCTD12;SREK1;XIST;RIN2;ATP6V1A;SET;MAGED1;KMT2C;MYCBP2;PIK3R1;FOXO3;PDS5A;MED12L;ARHGAP12;ABL2;MAP4;SKIL;ARGLU1;MCL1;HSPA8;CREBBP;EGR2;UBE2H;EGR3;CPSF6;DENND4A;EDEM1;CEP350;OGA;IRF2BP2;PRRC2C;EEF2;PUM1;AZIN1;MED13L;PUM2;NR4A2;CCDC88A;PAN3;GNAQ;NMT1;MDM4;TCF4;EIF4G2;…
Genes Changed In Secretory Ependymal Cells Of R6/2 Vs WT PMID32681824	HDSigDB 2021	DiestVMaleAccent1 (Diestrus vs Male, female high/KO upreg, male low/KO downreg)	74	396	1.94168e-19	4.15701	9.65386e-21	191.584	ITSN2;PHF3;RERE;SMG1;TRIO;THRB;USP32;CTNND2;USP34;LYST;ACTB;PITPNC1;SYNE1;NIPBL;FSD1L;KPNA4;ARIH1;FAM81A;PCMTD1;KPNA1;SOX5;KDM6A;MEF2A;ARHGEF12;RALGAPA1;VPS13A;RFX3;ASH1L;NCOR1;TRAF3;RUFY3;EXOC4;SIK3;SREK1;GAS7;GRAMD1B;ROCK1;MAOB;STAU2;ABHD2;KMT2C;ANKRD12;MYCBP2;GLIS3;PDS5B;PPM1E;STRN3;UBR5;TRA2A;LRRC4C;MAPK4;CLASP2;SRPK2;HSPA8;TCF7L2;CEP350;EXOC6B;SORBS2;HOOK3;CDC42BPA;PUM1;PHC3;CNOT4;AGBL4;DIAP…
Genes Changed In Secretory Ependymal Cells Of R6/2 Vs WT PMID32681824	HDSigDB 2021	Union of DiestVMaleAccent3 and EstVMaleAccent3 (female low/KO downreg, male high/KO upreg)	74	396	1.94168e-19	4.15701	9.65386e-21	191.584	ITSN2;PHF3;RERE;SMG1;TRIO;THRB;USP32;CTNND2;USP34;LYST;ACTB;PITPNC1;SYNE1;NIPBL;FSD1L;KPNA4;ARIH1;FAM81A;PCMTD1;KPNA1;SOX5;KDM6A;MEF2A;ARHGEF12;RALGAPA1;VPS13A;RFX3;ASH1L;NCOR1;TRAF3;RUFY3;EXOC4;SIK3;SREK1;GAS7;GRAMD1B;ROCK1;MAOB;STAU2;ABHD2;KMT2C;ANKRD12;MYCBP2;GLIS3;PDS5B;PPM1E;STRN3;UBR5;TRA2A;LRRC4C;MAPK4;CLASP2;SRPK2;HSPA8;TCF7L2;CEP350;EXOC6B;SORBS2;HOOK3;CDC42BPA;PUM1;PHC3;CNOT4;AGBL4;DIAP…
Genes Changed In Sst/Npy-expressing Interneurons Of R6/2 Vs WT PMID32681824	HDSigDB 2021	DiestVMaleAccent1 (Diestrus vs Male, female high/KO upreg, male low/KO downreg)	91	564	2.23886e-19	3.50986	1.12282e-20	161.228	RERE;GSK3B;SETD2;CSRNP3;THRB;UBE3C;FRMPD4;DGKB;CTNND2;CLTC;USP34;ARRB1;SH3RF1;DOCK10;RPS6KA3;RIMS4;ZMIZ1;TRIM2;CHORDC1;REV3L;ERC2;SOX6;PDE8B;KPNA3;KDM6A;NCOA1;MEF2C;PEG3;STRBP;LMO3;MAGI2;RFX3;ANK2;ANK3;DNAJC1;NCOR1;RALGAPB;MMP16;SETBP1;LRRC7;RUFY3;DOK6;EXOC4;SIK3;SREK1;FAM193A;XPR1;GAS7;PAFAH1B1;RAPGEF4;HDAC4;GRAMD1B;ROCK1;KMT2C;ANKRD12;MYCBP2;AKAP6;NYAP2;GIGYF2;STRN3;BCLAF1;ATXN1;SNTG1;TRA2A;SRG…
Genes Changed In Sst/Npy-expressing Interneurons Of R6/2 Vs WT PMID32681824	HDSigDB 2021	Union of DiestVMaleAccent3 and EstVMaleAccent3 (female low/KO downreg, male high/KO upreg)	91	564	2.23886e-19	3.50986	1.12282e-20	161.228	RERE;GSK3B;SETD2;CSRNP3;THRB;UBE3C;FRMPD4;DGKB;CTNND2;CLTC;USP34;ARRB1;SH3RF1;DOCK10;RPS6KA3;RIMS4;ZMIZ1;TRIM2;CHORDC1;REV3L;ERC2;SOX6;PDE8B;KPNA3;KDM6A;NCOA1;MEF2C;PEG3;STRBP;LMO3;MAGI2;RFX3;ANK2;ANK3;DNAJC1;NCOR1;RALGAPB;MMP16;SETBP1;LRRC7;RUFY3;DOK6;EXOC4;SIK3;SREK1;FAM193A;XPR1;GAS7;PAFAH1B1;RAPGEF4;HDAC4;GRAMD1B;ROCK1;KMT2C;ANKRD12;MYCBP2;AKAP6;NYAP2;GIGYF2;STRN3;BCLAF1;ATXN1;SNTG1;TRA2A;SRG…
Genes Changed In Nortriptyline Treated STHdhQ111 Vs Control GSE129143	HDSigDB 2021	DiestVMaleAccent1 (Diestrus vs Male, female high/KO upreg, male low/KO downreg)	67	336	3.63048e-19	4.48761	1.83643e-20	203.934	ITSN2;CYFIP1;NCKAP1;PYGB;PANK3;BTG1;DGKD;UBE3C;LRRK2;USP34;IPP;OSBPL11;AFF4;SH3RF1;ARHGAP35;DSTYK;GNPTAB;ERC2;TNPO1;SPTAN1;COA5;NCOA2;ZYG11B;PCYT1A;ARHGEF12;NCOA3;VPS13C;VPS13D;MRTFB;RBSN;CKAP5;BCR;TANC1;ARMCX2;RALGAPB;ALS2;TRAF3;CTDSP2;PKP4;SFT2D2;ANAPC1;XPR1;MTMR1;CLEC16A;SLAIN2;KIF3B;TNKS2;PRKAR2A;UBN1;ABL2;EIF4EBP2;ANKRD52;KLHDC10;TCF7L2;EDEM1;SEC16A;HUWE1;OGA;AP2B1;USF3;MED13L;DIAPH1;CNOT1;A…
Genes Changed In Nortriptyline Treated STHdhQ111 Vs Control GSE129143	HDSigDB 2021	Union of DiestVMaleAccent3 and EstVMaleAccent3 (female low/KO downreg, male high/KO upreg)	67	336	3.63048e-19	4.48761	1.83643e-20	203.934	ITSN2;CYFIP1;NCKAP1;PYGB;PANK3;BTG1;DGKD;UBE3C;LRRK2;USP34;IPP;OSBPL11;AFF4;SH3RF1;ARHGAP35;DSTYK;GNPTAB;ERC2;TNPO1;SPTAN1;COA5;NCOA2;ZYG11B;PCYT1A;ARHGEF12;NCOA3;VPS13C;VPS13D;MRTFB;RBSN;CKAP5;BCR;TANC1;ARMCX2;RALGAPB;ALS2;TRAF3;CTDSP2;PKP4;SFT2D2;ANAPC1;XPR1;MTMR1;CLEC16A;SLAIN2;KIF3B;TNKS2;PRKAR2A;UBN1;ABL2;EIF4EBP2;ANKRD52;KLHDC10;TCF7L2;EDEM1;SEC16A;HUWE1;OGA;AP2B1;USF3;MED13L;DIAPH1;CNOT1;A…
Expression In 12 Wk R6/2 HD Mice (Set1) GSE9803	HDSigDB 2021	DiestVMaleAccent1 (Diestrus vs Male, female high/KO upreg, male low/KO downreg)	380	4540	5.14179e-19	1.86734	2.62314e-20	84.1933	CYFIP2;CYFIP1;NCKAP1;TRIO;MTRR;NEXMIF;ARAF;CCNC;MSANTD4;IKZF2;UBE2L3;RPS6KA3;ZMIZ1;DPYSL3;LUC7L;GLUL;CALN1;MED1;PRKAB2;MEF2C;PRKCI;OXSM;MRTFB;FRS2;MMD2;SOX11;ANK3;HPCAL4;ASRGL1;BCR;AR;STX1B;SNHG14;PPP1R3C;RUFY3;XRN2;SIK3;RELCH;KCTD12;ATF6;MTMR1;NECAB1;LXN;EPAS1;MAGED1;MTMR9;NEDD4L;IQGAP2;SMIM7;GIGYF2;TTBK2;PRKAR2A;RAD21;DHX36;DPH3;MCMBP;STXBP5;MAP4;SRPK2;CREBBP;EGR2;FZD3;GSTM1;EGR3;PHC1;DTNA;HOME…
Expression In 12 Wk R6/2 HD Mice (Set1) GSE9803	HDSigDB 2021	Union of DiestVMaleAccent3 and EstVMaleAccent3 (female low/KO downreg, male high/KO upreg)	380	4540	5.14179e-19	1.86734	2.62314e-20	84.1933	CYFIP2;CYFIP1;NCKAP1;TRIO;MTRR;NEXMIF;ARAF;CCNC;MSANTD4;IKZF2;UBE2L3;RPS6KA3;ZMIZ1;DPYSL3;LUC7L;GLUL;CALN1;MED1;PRKAB2;MEF2C;PRKCI;OXSM;MRTFB;FRS2;MMD2;SOX11;ANK3;HPCAL4;ASRGL1;BCR;AR;STX1B;SNHG14;PPP1R3C;RUFY3;XRN2;SIK3;RELCH;KCTD12;ATF6;MTMR1;NECAB1;LXN;EPAS1;MAGED1;MTMR9;NEDD4L;IQGAP2;SMIM7;GIGYF2;TTBK2;PRKAR2A;RAD21;DHX36;DPH3;MCMBP;STXBP5;MAP4;SRPK2;CREBBP;EGR2;FZD3;GSTM1;EGR3;PHC1;DTNA;HOME…
Genes Changed In 4-Deoxypyridoxine Treated STHdhQ111 Vs Control GSE129143	HDSigDB 2021	DiestVMaleAccent1 (Diestrus vs Male, female high/KO upreg, male low/KO downreg)	164	1424	5.89552e-19	2.45023	3.03314e-20	110.119	ITSN2;CYFIP1;NCKAP1;OXNAD1;GMFB;TRIO;PANK3;UBE3C;TRRAP;PRDM2;ARHGAP35;AMOT;PTAR1;TATDN1;OSBP;KPNA6;PPFIA1;EP300;SLC25A44;KPNA1;NSF;PHYH;VPS33A;MRTFB;AP1B1;UHMK1;BCR;TANC1;ILF3;RALGAPB;XRN1;XRN2;SUCLG2;PKP4;ANAPC1;ATP6V1A;MTMR1;DNMT1;ABHD2;CLEC16A;MTMR9;BAZ2A;SLAIN2;PDS5B;RASAL2;MTMR4;STK4;GIGYF2;CAMSAP2;KIF3B;UBR5;EIF4EBP2;ABL2;RAB6B;PCK2;KLHDC10;SPECC1;GSTM3;HSPA8;GSTM1;CBX5;SEC16A;CEP350;EXOC6B…
Genes Changed In 4-Deoxypyridoxine Treated STHdhQ111 Vs Control GSE129143	HDSigDB 2021	Union of DiestVMaleAccent3 and EstVMaleAccent3 (female low/KO downreg, male high/KO upreg)	164	1424	5.89552e-19	2.45023	3.03314e-20	110.119	ITSN2;CYFIP1;NCKAP1;OXNAD1;GMFB;TRIO;PANK3;UBE3C;TRRAP;PRDM2;ARHGAP35;AMOT;PTAR1;TATDN1;OSBP;KPNA6;PPFIA1;EP300;SLC25A44;KPNA1;NSF;PHYH;VPS33A;MRTFB;AP1B1;UHMK1;BCR;TANC1;ILF3;RALGAPB;XRN1;XRN2;SUCLG2;PKP4;ANAPC1;ATP6V1A;MTMR1;DNMT1;ABHD2;CLEC16A;MTMR9;BAZ2A;SLAIN2;PDS5B;RASAL2;MTMR4;STK4;GIGYF2;CAMSAP2;KIF3B;UBR5;EIF4EBP2;ABL2;RAB6B;PCK2;KLHDC10;SPECC1;GSTM3;HSPA8;GSTM1;CBX5;SEC16A;CEP350;EXOC6B…
Probable Astrocyte-Enriched Genes PMID18171944	HDSigDB 2021	DiestVMaleAccent1 (Diestrus vs Male, female high/KO upreg, male low/KO downreg)	247	2550	7.53486e-19	2.08424	3.90913e-20	93.1415	CYFIP1;CHIC1;AHCYL1;SPARC;ABAT;UBE2L3;PREX2;ALKBH5;SCP2;PLCE1;LUC7L;CIAO2A;GLUL;SOX5;UNC13C;PHKA1;MMD2;ANK2;ASRGL1;BCR;PPP1R3C;RUFY3;SIK3;SUCLG2;KCTD12;RIN2;ALDH7A1;SMIM3;LXN;SDC4;MAOB;EPAS1;STXBP4;IQGAP2;SULT1A1;EPB41L5;RIMKLB;PCK2;GSTM3;GSTM1;DTNA;NEBL;TIPARP;IRF2BP2;BBIP1;GNG12;PRDX6;ACADSB;PBX1;DCLK1;CCDC88A;KYAT3;ECHDC1;ANP32E;MAGED2;SFXN5;GSTM5;CPEB4;PYGB;BTG1;CDKN1B;CLTC;ADK;PYGM;RSF1;TFCP…
Probable Astrocyte-Enriched Genes PMID18171944	HDSigDB 2021	Union of DiestVMaleAccent3 and EstVMaleAccent3 (female low/KO downreg, male high/KO upreg)	247	2550	7.53486e-19	2.08424	3.90913e-20	93.1415	CYFIP1;CHIC1;AHCYL1;SPARC;ABAT;UBE2L3;PREX2;ALKBH5;SCP2;PLCE1;LUC7L;CIAO2A;GLUL;SOX5;UNC13C;PHKA1;MMD2;ANK2;ASRGL1;BCR;PPP1R3C;RUFY3;SIK3;SUCLG2;KCTD12;RIN2;ALDH7A1;SMIM3;LXN;SDC4;MAOB;EPAS1;STXBP4;IQGAP2;SULT1A1;EPB41L5;RIMKLB;PCK2;GSTM3;GSTM1;DTNA;NEBL;TIPARP;IRF2BP2;BBIP1;GNG12;PRDX6;ACADSB;PBX1;DCLK1;CCDC88A;KYAT3;ECHDC1;ANP32E;MAGED2;SFXN5;GSTM5;CPEB4;PYGB;BTG1;CDKN1B;CLTC;ADK;PYGM;RSF1;TFCP…
Genes Up-Regulated In Ciliated Ependymal Cells Of HD Patients Vs Control PMID32681824	HDSigDB 2021	DiestVMaleAccent1 (Diestrus vs Male, female high/KO upreg, male low/KO downreg)	168	1483	1.0102e-18	2.4078	5.28464e-20	106.875	CYFIP1;ALDH1L1;RIPOR1;CHIC1;TRIO;DGKD;UBE3C;ZFYVE9;TRRAP;NEXMIF;WIPF2;PRDM2;ARHGAP35;YY1;DOCK10;RPS6KA3;ALKBH5;SYNGAP1;ZMIZ1;NFATC2IP;PPFIA1;LUC7L;TBC1D22A;PKNOX2;ACOT11;DYRK1A;AP1B1;ANK3;BCR;MOSMO;TANC1;DOK6;TCEANC2;PKP4;RIN2;INO80D;SHC3;KMT2A;ARHGEF26;KMT2C;PDE1A;GLIS3;SLC1A2;CLEC16A;NEDD4L;BAZ2A;PDS5B;PLA2G6;FOXO3;PDS5A;GIGYF2;MED12L;TTBK2;CAMSAP2;LARP1;PRKAR2A;SRGAP3;MAP4;ARGLU1;LONRF2;SRPK2;…
Genes Up-Regulated In Ciliated Ependymal Cells Of HD Patients Vs Control PMID32681824	HDSigDB 2021	Union of DiestVMaleAccent3 and EstVMaleAccent3 (female low/KO downreg, male high/KO upreg)	168	1483	1.0102e-18	2.4078	5.28464e-20	106.875	CYFIP1;ALDH1L1;RIPOR1;CHIC1;TRIO;DGKD;UBE3C;ZFYVE9;TRRAP;NEXMIF;WIPF2;PRDM2;ARHGAP35;YY1;DOCK10;RPS6KA3;ALKBH5;SYNGAP1;ZMIZ1;NFATC2IP;PPFIA1;LUC7L;TBC1D22A;PKNOX2;ACOT11;DYRK1A;AP1B1;ANK3;BCR;MOSMO;TANC1;DOK6;TCEANC2;PKP4;RIN2;INO80D;SHC3;KMT2A;ARHGEF26;KMT2C;PDE1A;GLIS3;SLC1A2;CLEC16A;NEDD4L;BAZ2A;PDS5B;PLA2G6;FOXO3;PDS5A;GIGYF2;MED12L;TTBK2;CAMSAP2;LARP1;PRKAR2A;SRGAP3;MAP4;ARGLU1;LONRF2;SRPK2;…
Cortex RNA M37 Module (Skyblue3) PMID26900923	HDSigDB 2021	DiestVMaleAccent1 (Diestrus vs Male, female high/KO upreg, male low/KO downreg)	73	399	1.19408e-18	4.0457	6.29823e-20	178.866	NCKAP1;GSK3B;IPO11;CHIC1;UBE3C;GDA;NEXMIF;CSE1L;FMR1;CLTC;SNX12;ELAVL4;KANTR;IPO7;WDR44;IPO5;YY1;PAIP2B;PEG13;PLXNC1;PCMTD1;KPNA1;NSF;USP46;ZYG11B;PRKCI;GGPS1;RFC1;LMO3;USP45;RFX3;PGM2L1;PJA2;MOSMO;RUFY3;TMEM126B;BCAT1;MAPRE2;NECAB1;RNMT;STAU2;PDE1A;GMPS;PIK3R1;PDS5B;ZBTB41;BCLAF1;POLR2B;FUT9;FAM120C;PPP1R7;ZMAT4;TASOR;FNIP1;PAK3;EPS15;LONRF2;ZKSCAN1;TRIM44;CCDC73;SRPK2;MAP3K2;ARFGEF1;SLC35A3;CBX…
Cortex RNA M37 Module (Skyblue3) PMID26900923	HDSigDB 2021	Union of DiestVMaleAccent3 and EstVMaleAccent3 (female low/KO downreg, male high/KO upreg)	73	399	1.19408e-18	4.0457	6.29823e-20	178.866	NCKAP1;GSK3B;IPO11;CHIC1;UBE3C;GDA;NEXMIF;CSE1L;FMR1;CLTC;SNX12;ELAVL4;KANTR;IPO7;WDR44;IPO5;YY1;PAIP2B;PEG13;PLXNC1;PCMTD1;KPNA1;NSF;USP46;ZYG11B;PRKCI;GGPS1;RFC1;LMO3;USP45;RFX3;PGM2L1;PJA2;MOSMO;RUFY3;TMEM126B;BCAT1;MAPRE2;NECAB1;RNMT;STAU2;PDE1A;GMPS;PIK3R1;PDS5B;ZBTB41;BCLAF1;POLR2B;FUT9;FAM120C;PPP1R7;ZMAT4;TASOR;FNIP1;PAK3;EPS15;LONRF2;ZKSCAN1;TRIM44;CCDC73;SRPK2;MAP3K2;ARFGEF1;SLC35A3;CBX…
UBTF ENCODE	ENCODE-ChEA_Consensus_Regulating_TFs	DiestVMaleAccent1 (Diestrus vs Male, female high/KO upreg, male low/KO downreg)	181	1631	1.40897e-18	2.36752	1.35478e-20	108.309	ITSN2;OTUD4;CCDC71L;CYFIP1;NCKAP1;PANK3;FMR1;CCNC;UBE3A;DCAF6;YY1;RPS6KA3;COL4A3BP;GNPTAB;ZMIZ1;GPBP1;CDK5RAP1;EP300;KPNA4;ARID2;KPNA3;GLUL;MAP3K5;AGFG1;MEF2A;PAQR8;EIF1AX;RALGAPA1;OXSM;DYRK1A;FRS2;FBXO11;THAP2;ATG12;KCTD6;WDR82;TBL1XR1;ANKRD40;LRRC58;SMIM3;INO80D;KMT2C;DCUN1D1;NEDD4L;SLAIN2;PIK3R1;RASAL2;FOXO3;ARHGAP12;CAMSAP2;ATXN1;PRKAR2A;EIF4EBP2;STXBP5;MAP4;SOCS7;EGR2;CPSF6;HOMER1;TIPARP;EDE…
Genes Up-Regulated In iSPNs Of R6/2 Vs WT PMID32681824	HDSigDB 2021	DiestVMaleAccent1 (Diestrus vs Male, female high/KO upreg, male low/KO downreg)	59	275	1.67542e-18	4.89753	8.9095e-20	214.828	USP34;ADK;UBE3A;FMN2;BICD1;NIPBL;EP300;TNR;ARIH1;ERC2;KDM6A;RALGAPA1;SGIP1;MAGI2;ANK2;DNAJC1;NCOR1;SETBP1;RUFY3;DOK6;EXOC4;FAM193A;SHANK2;PAFAH1B1;ROCK1;PDE1A;ANKRD12;PRICKLE2;LIN7A;NYAP2;GIGYF2;STRN3;FGD4;BTAF1;MAP2;SNTG1;TRA2A;KLHDC10;CLASP2;HSPA8;CREBBP;EXOC6B;PRRC2C;ARHGAP26;CDC42BPA;PBX1;MAPK10;CCDC88A;AGBL4;FAM135B;PAN3;FMNL2;APC;GNAQ;NF1;TRIP12;TCF4;CDK14;PAM
Genes Up-Regulated In iSPNs Of R6/2 Vs WT PMID32681824	HDSigDB 2021	Union of DiestVMaleAccent3 and EstVMaleAccent3 (female low/KO downreg, male high/KO upreg)	59	275	1.67542e-18	4.89753	8.9095e-20	214.828	USP34;ADK;UBE3A;FMN2;BICD1;NIPBL;EP300;TNR;ARIH1;ERC2;KDM6A;RALGAPA1;SGIP1;MAGI2;ANK2;DNAJC1;NCOR1;SETBP1;RUFY3;DOK6;EXOC4;FAM193A;SHANK2;PAFAH1B1;ROCK1;PDE1A;ANKRD12;PRICKLE2;LIN7A;NYAP2;GIGYF2;STRN3;FGD4;BTAF1;MAP2;SNTG1;TRA2A;KLHDC10;CLASP2;HSPA8;CREBBP;EXOC6B;PRRC2C;ARHGAP26;CDC42BPA;PBX1;MAPK10;CCDC88A;AGBL4;FAM135B;PAN3;FMNL2;APC;GNAQ;NF1;TRIP12;TCF4;CDK14;PAM
SOX5 OE FETALCORTEX HUMAN GSE89057 RNASEQ UP	Lit Mined TF Perturbation Signatures	DiestVMaleAccent1 (Diestrus vs Male, female high/KO upreg, male low/KO downreg)	87	511	2.16426e-18	3.73852	2.21862e-21	177.794	PHF3;RERE;TOP2B;GSK3B;TRIO;NRSN1;CSRNP3;DDX3X;CTNND2;FMR1;RSF1;ACTB;PCMTD2;SYNGAP1;ATCAY;SESN3;ZMIZ1;TRIM2;KIF5A;REV3L;IDS;CEP170;SPTAN1;ARFGEF3;PKNOX2;SOX5;RBM33;MEF2A;NCOA2;ARHGEF12;PEG3;VPS13C;MAGI2;SOX11;ANK3;SMC1A;DYNLL2;RC3H2;PJA2;PHF20L1;EEF1G;STX1B;ILF3;MMP16;LRRC7;RUFY3;DOK6;KCTD12;PAFAH1B1;INO80D;MAGED1;ANKRD12;MYCBP2;NOLC1;AKAP6;PIK3R1;GIGYF2;BCLAF1;CAMK2N1;ARGLU1;EIF4B;CLASP2;SRPK2;AR…
SOX5 OE FETALCORTEX HUMAN GSE89057 RNASEQ UP	Lit Mined TF Perturbation Signatures	EstVMaleAccent1 (Estrus vs Male, female high/KO upreg, male low/KO downreg)	87	511	2.16426e-18	3.73852	2.21862e-21	177.794	PHF3;RERE;TOP2B;GSK3B;TRIO;NRSN1;CSRNP3;DDX3X;CTNND2;FMR1;RSF1;ACTB;PCMTD2;SYNGAP1;ATCAY;SESN3;ZMIZ1;TRIM2;KIF5A;REV3L;IDS;CEP170;SPTAN1;ARFGEF3;PKNOX2;SOX5;RBM33;MEF2A;NCOA2;ARHGEF12;PEG3;VPS13C;MAGI2;SOX11;ANK3;SMC1A;DYNLL2;RC3H2;PJA2;PHF20L1;EEF1G;STX1B;ILF3;MMP16;LRRC7;RUFY3;DOK6;KCTD12;PAFAH1B1;INO80D;MAGED1;ANKRD12;MYCBP2;NOLC1;AKAP6;PIK3R1;GIGYF2;BCLAF1;CAMK2N1;ARGLU1;EIF4B;CLASP2;SRPK2;AR…
SOX5 OE FETALCORTEX HUMAN GSE89057 RNASEQ UP	Lit Mined TF Perturbation Signatures	DiestVMaleAccent3 (Diestrus vs Male, female low/KO downreg, male high/KO upreg)	87	511	2.16426e-18	3.73852	2.21862e-21	177.794	PHF3;RERE;TOP2B;GSK3B;TRIO;NRSN1;CSRNP3;DDX3X;CTNND2;FMR1;RSF1;ACTB;PCMTD2;SYNGAP1;ATCAY;SESN3;ZMIZ1;TRIM2;KIF5A;REV3L;IDS;CEP170;SPTAN1;ARFGEF3;PKNOX2;SOX5;RBM33;MEF2A;NCOA2;ARHGEF12;PEG3;VPS13C;MAGI2;SOX11;ANK3;SMC1A;DYNLL2;RC3H2;PJA2;PHF20L1;EEF1G;STX1B;ILF3;MMP16;LRRC7;RUFY3;DOK6;KCTD12;PAFAH1B1;INO80D;MAGED1;ANKRD12;MYCBP2;NOLC1;AKAP6;PIK3R1;GIGYF2;BCLAF1;CAMK2N1;ARGLU1;EIF4B;CLASP2;SRPK2;AR…
Top Endothelial Cell-Expressed Genes In Humans And Mice PMID29892006	HDSigDB 2021	DiestVMaleAccent1 (Diestrus vs Male, female high/KO upreg, male low/KO downreg)	128	1000	2.47313e-18	2.71959	1.32585e-19	118.213	ITSN2;CYFIP1;NCKAP1;AHCYL1;SPARC;ACTB;PREX2;RGS5;SLK;SCP2;GPBP1;PLS3;PDE8B;GLUL;AGFG1;MEF2A;MEF2C;RALGAPA1;MRTFB;ANK2;TUG1;XRN1;XRN2;SELENOP;PKP4;SREK1;XIST;JCAD;XPR1;ATP6V1A;KMT2A;EPAS1;KMT2C;ABHD2;MYCBP2;ANKRD12;SLC1A2;RAD21;UBR5;G3BP2;MAP4;SKIL;ARGLU1;ZKSCAN1;MCL1;HSPA8;CREBBP;UBE2H;CBX5;NEBL;TIPARP;CAV2;OGA;DSTN;PRRC2C;HOOK3;EEF2;MED13L;PUM2;CCDC88A;PAN3;GNAQ;TCF4;EIF4G2;PICALM;GSK3B;TOP2B;DD…
Top Endothelial Cell-Expressed Genes In Humans And Mice PMID29892006	HDSigDB 2021	Union of DiestVMaleAccent3 and EstVMaleAccent3 (female low/KO downreg, male high/KO upreg)	128	1000	2.47313e-18	2.71959	1.32585e-19	118.213	ITSN2;CYFIP1;NCKAP1;AHCYL1;SPARC;ACTB;PREX2;RGS5;SLK;SCP2;GPBP1;PLS3;PDE8B;GLUL;AGFG1;MEF2A;MEF2C;RALGAPA1;MRTFB;ANK2;TUG1;XRN1;XRN2;SELENOP;PKP4;SREK1;XIST;JCAD;XPR1;ATP6V1A;KMT2A;EPAS1;KMT2C;ABHD2;MYCBP2;ANKRD12;SLC1A2;RAD21;UBR5;G3BP2;MAP4;SKIL;ARGLU1;ZKSCAN1;MCL1;HSPA8;CREBBP;UBE2H;CBX5;NEBL;TIPARP;CAV2;OGA;DSTN;PRRC2C;HOOK3;EEF2;MED13L;PUM2;CCDC88A;PAN3;GNAQ;TCF4;EIF4G2;PICALM;GSK3B;TOP2B;DD…
Striatum RNA M38 Module (Plum1) PMID26900923	HDSigDB 2021	DiestVMaleAccent1 (Diestrus vs Male, female high/KO upreg, male low/KO downreg)	66	339	2.49822e-18	4.35071	1.3501e-19	189.034	PHF3;RBM27;KDM5B;AHCTF1;OSBPL11;CHD1;YY1;RIMS4;MED13;XPO1;FSD1L;KPNA6;LUC7L;EP300;ARID2;AGFG1;MAP3K5;MED1;PRKAB2;CDADC1;GGPS1;DESI2;TSC22D2;FN3KRP;FAM126B;RBSN;LATS1;MARF1;CREB1;ALS2;TRAF3;FAM193A;SHANK2;LRRC58;MEAF6;NUFIP2;ROCK1;ANKRD12;PRICKLE2;GIGYF2;ZBTB41;CAMSAP2;WDCP;LARP1;KCTD20;PRKAR2A;UBR5;MCMBP;GPBP1L1;LONRF2;ARFGEF1;RNF20;CREBBP;FEM1B;GFPT1;YLPM1;NOC3L;PUM1;RANBP6;AFDN;DIAPH1;FER;CASTO…
Striatum RNA M38 Module (Plum1) PMID26900923	HDSigDB 2021	Union of DiestVMaleAccent3 and EstVMaleAccent3 (female low/KO downreg, male high/KO upreg)	66	339	2.49822e-18	4.35071	1.3501e-19	189.034	PHF3;RBM27;KDM5B;AHCTF1;OSBPL11;CHD1;YY1;RIMS4;MED13;XPO1;FSD1L;KPNA6;LUC7L;EP300;ARID2;AGFG1;MAP3K5;MED1;PRKAB2;CDADC1;GGPS1;DESI2;TSC22D2;FN3KRP;FAM126B;RBSN;LATS1;MARF1;CREB1;ALS2;TRAF3;FAM193A;SHANK2;LRRC58;MEAF6;NUFIP2;ROCK1;ANKRD12;PRICKLE2;GIGYF2;ZBTB41;CAMSAP2;WDCP;LARP1;KCTD20;PRKAR2A;UBR5;MCMBP;GPBP1L1;LONRF2;ARFGEF1;RNF20;CREBBP;FEM1B;GFPT1;YLPM1;NOC3L;PUM1;RANBP6;AFDN;DIAPH1;FER;CASTO…
Genes Changed In HD Neurons Treated With ZFP-C Vs Control GSE127821	HDSigDB 2021	DiestVMaleAccent1 (Diestrus vs Male, female high/KO upreg, male low/KO downreg)	209	2043	2.57112e-18	2.18016	1.40061e-19	94.6456	ITSN2;NCKAP1;AHCYL1;PLEKHB2;ABAT;UBE2L3;GPBP1;CHORDC1;MEF2A;PAQR8;SAP30BP;PHKA1;ANK3;UHMK1;BCR;AR;MARF1;XRN2;HECA;ALDH7A1;SDC4;MTMR9;NEDD4L;SLAIN2;PIK3R1;IQGAP2;GIGYF2;RAD21;DHX36;ARGLU1;RAB11FIP4;SCAI;SRPK2;FZD3;PHC1;PRRC2C;IRF2BP2;PUM1;ACADSB;PBX1;AGO4;AGO1;MAGED2;CPEB2;CPEB4;PHF3;HBS1L;SETD2;AHCTF1;PHF20;CLTC;RSF1;FMN2;ARHGAP5;OSBPL11;SMG7;LYST;WDR44;PCMTD2;DSTYK;PIP4P2;NHSL1;XPO1;NKRF;OTUD6B;…
Genes Changed In HD Neurons Treated With ZFP-C Vs Control GSE127821	HDSigDB 2021	Union of DiestVMaleAccent3 and EstVMaleAccent3 (female low/KO downreg, male high/KO upreg)	209	2043	2.57112e-18	2.18016	1.40061e-19	94.6456	ITSN2;NCKAP1;AHCYL1;PLEKHB2;ABAT;UBE2L3;GPBP1;CHORDC1;MEF2A;PAQR8;SAP30BP;PHKA1;ANK3;UHMK1;BCR;AR;MARF1;XRN2;HECA;ALDH7A1;SDC4;MTMR9;NEDD4L;SLAIN2;PIK3R1;IQGAP2;GIGYF2;RAD21;DHX36;ARGLU1;RAB11FIP4;SCAI;SRPK2;FZD3;PHC1;PRRC2C;IRF2BP2;PUM1;ACADSB;PBX1;AGO4;AGO1;MAGED2;CPEB2;CPEB4;PHF3;HBS1L;SETD2;AHCTF1;PHF20;CLTC;RSF1;FMN2;ARHGAP5;OSBPL11;SMG7;LYST;WDR44;PCMTD2;DSTYK;PIP4P2;NHSL1;XPO1;NKRF;OTUD6B;…
Genes Changed In Cerebellum Of 12 Week Old Atxn1[154Q/2Q] Vs WT GSE122099	HDSigDB 2021	DiestVMaleAccent1 (Diestrus vs Male, female high/KO upreg, male low/KO downreg)	218	2175	4.00268e-18	2.13732	2.19776e-19	91.8229	CYFIP1;PANK3;SPARC;KLHDC7A;PPP4R4;GLUL;UNC13C;PRKCI;SOX11;HPCAL4;ASRGL1;PPP1R3C;XRN1;XRN2;SIK3;RELCH;HECA;KCTD12;ZFPM2;CLOCK;MTMR1;NECAB1;LXN;MAOB;LYPD1;TMTC1;PIK3R1;NYAP2;IQGAP2;LARP1;RAD21;DHX36;STXBP5;ARGLU1;RAB11FIP4;CREBBP;EGR3;HOMER2;INTS2;IQSEC3;RAB27B;BBIP1;HSPA12A;TMEM196;ST18;MED13L;PUM2;PEX5L;EHD3;SLC6A8;AGO1;FXYD6;RGL1;CDK14;PAM;SFXN5;PHF3;PYGB;TOP2B;CDKN1B;NRSN1;HIP1;PRL;ZCCHC18;ARHG…
Genes Changed In Cerebellum Of 12 Week Old Atxn1[154Q/2Q] Vs WT GSE122099	HDSigDB 2021	Union of DiestVMaleAccent3 and EstVMaleAccent3 (female low/KO downreg, male high/KO upreg)	218	2175	4.00268e-18	2.13732	2.19776e-19	91.8229	CYFIP1;PANK3;SPARC;KLHDC7A;PPP4R4;GLUL;UNC13C;PRKCI;SOX11;HPCAL4;ASRGL1;PPP1R3C;XRN1;XRN2;SIK3;RELCH;HECA;KCTD12;ZFPM2;CLOCK;MTMR1;NECAB1;LXN;MAOB;LYPD1;TMTC1;PIK3R1;NYAP2;IQGAP2;LARP1;RAD21;DHX36;STXBP5;ARGLU1;RAB11FIP4;CREBBP;EGR3;HOMER2;INTS2;IQSEC3;RAB27B;BBIP1;HSPA12A;TMEM196;ST18;MED13L;PUM2;PEX5L;EHD3;SLC6A8;AGO1;FXYD6;RGL1;CDK14;PAM;SFXN5;PHF3;PYGB;TOP2B;CDKN1B;NRSN1;HIP1;PRL;ZCCHC18;ARHG…
Genes Changed In OPCs Of HD Patients Vs Control PMID32681824	HDSigDB 2021	DiestVMaleAccent1 (Diestrus vs Male, female high/KO upreg, male low/KO downreg)	108	778	5.72165e-18	2.95912	3.16633e-19	126.048	DGKG;RAB3C;DGKB;CTNND2;ABAT;ACTB;ARHGAP35;PREX2;DOCK10;GNPTAB;DPYSL5;ZMIZ1;DPYSL3;CHORDC1;PLCE1;TNR;STK32B;MAP3K5;CALN1;SOX5;NSF;MAGI2;RFX3;ANK2;MMD2;BCR;TBL1XR1;SIK3;PKP4;ZFPM2;RIN2;INO80D;SHC3;ABHD2;SLC1A2;RASAL2;NDRG2;PDS5A;ATXN1;FUT9;SNTG1;MAP2;UBR5;LRRC4C;SPECC1;CREBBP;KLHL28;PRRC2C;FOXN2;ST18;PEX5L;AGO2;TCF4;CPEB4;CSRNP3;HIP1;ADK;FMN2;PPP1R9A;BICD1;PITPNC1;SYNE1;PCMTD2;SPRED1;NHSL1;TRIM2;RE…
Genes Changed In OPCs Of HD Patients Vs Control PMID32681824	HDSigDB 2021	Union of DiestVMaleAccent3 and EstVMaleAccent3 (female low/KO downreg, male high/KO upreg)	108	778	5.72165e-18	2.95912	3.16633e-19	126.048	DGKG;RAB3C;DGKB;CTNND2;ABAT;ACTB;ARHGAP35;PREX2;DOCK10;GNPTAB;DPYSL5;ZMIZ1;DPYSL3;CHORDC1;PLCE1;TNR;STK32B;MAP3K5;CALN1;SOX5;NSF;MAGI2;RFX3;ANK2;MMD2;BCR;TBL1XR1;SIK3;PKP4;ZFPM2;RIN2;INO80D;SHC3;ABHD2;SLC1A2;RASAL2;NDRG2;PDS5A;ATXN1;FUT9;SNTG1;MAP2;UBR5;LRRC4C;SPECC1;CREBBP;KLHL28;PRRC2C;FOXN2;ST18;PEX5L;AGO2;TCF4;CPEB4;CSRNP3;HIP1;ADK;FMN2;PPP1R9A;BICD1;PITPNC1;SYNE1;PCMTD2;SPRED1;NHSL1;TRIM2;RE…
Genes Down-Regulated In Striatum Of R6/2 Vs WT Mice GSE109416	HDSigDB 2021	DiestVMaleAccent1 (Diestrus vs Male, female high/KO upreg, male low/KO downreg)	211	2086	6.06834e-18	2.15255	3.38442e-19	91.5477	CYFIP2;NCKAP1;AHCYL1;SPARC;TRRAP;ABAT;ACTB;PREX2;RPS6KA3;SYNGAP1;SCP2;PPP4R4;GLUL;CALN1;MEF2A;MED1;UNC13C;PRKCI;MRTFB;RFX3;ANK3;HPCAL4;ASRGL1;BCR;STX1B;PPP1R3C;SIK3;ATF6;NECAB1;LXN;SDC4;LYPD1;AGAP2;NEDD4L;TMTC1;IQGAP2;MAP4;ARGLU1;EGR2;FZD3;GSTM1;EGR3;DTNA;HOMER1;NEBL;TIPARP;IRF2BP2;RAB27B;DCLK1;FOSL2;SLC6A8;AGO4;MYO5B;AGO2;KYAT3;SFXN5;GSTM5;CPEB4;CDK16;TOP2B;SETD2;NRSN1;LYST;ZMYM1;SIPA1L1;DENND11…
Genes Down-Regulated In Striatum Of R6/2 Vs WT Mice GSE109416	HDSigDB 2021	Union of DiestVMaleAccent3 and EstVMaleAccent3 (female low/KO downreg, male high/KO upreg)	211	2086	6.06834e-18	2.15255	3.38442e-19	91.5477	CYFIP2;NCKAP1;AHCYL1;SPARC;TRRAP;ABAT;ACTB;PREX2;RPS6KA3;SYNGAP1;SCP2;PPP4R4;GLUL;CALN1;MEF2A;MED1;UNC13C;PRKCI;MRTFB;RFX3;ANK3;HPCAL4;ASRGL1;BCR;STX1B;PPP1R3C;SIK3;ATF6;NECAB1;LXN;SDC4;LYPD1;AGAP2;NEDD4L;TMTC1;IQGAP2;MAP4;ARGLU1;EGR2;FZD3;GSTM1;EGR3;DTNA;HOMER1;NEBL;TIPARP;IRF2BP2;RAB27B;DCLK1;FOSL2;SLC6A8;AGO4;MYO5B;AGO2;KYAT3;SFXN5;GSTM5;CPEB4;CDK16;TOP2B;SETD2;NRSN1;LYST;ZMYM1;SIPA1L1;DENND11…
Influence Of Hsp90 Inhibitor On Expression In WT Mice GSE29681	HDSigDB 2021	DiestVMaleAccent1 (Diestrus vs Male, female high/KO upreg, male low/KO downreg)	285	3160	1.12282e-17	1.94665	6.31071e-19	81.578	CYFIP1;TRIO;IPP;CCNC;IKZF2;PREX2;PPP2R1A;GPBP1;DPYSL3;CHORDC1;GLUL;SOX5;PAQR8;MED1;UNC13C;PRKAB2;PRKCI;PHKA1;MMD2;ANK2;SOX11;ANK3;RC3H2;THAP2;ATG12;XRN2;SIK3;SUCLG2;RELCH;HECA;KCTD12;ATF6;ALDH7A1;CLOCK;SMIM3;NECAB1;SDC4;MYCBP2;NEDD4L;MTMR4;SMIM7;GIGYF2;SULT1A1;MAP2;DHX36;RIMKLB;SCAI;ZRANB3;GSTM3;CREBBP;FZD3;DTNA;HOMER1;NEBL;TIPARP;EDEM1;INTS2;PRRC2C;PUM1;PRDX6;PBX1;DCLK1;ST18;PUM2;SLC6A8;MYO5B;AG…
Influence Of Hsp90 Inhibitor On Expression In WT Mice GSE29681	HDSigDB 2021	Union of DiestVMaleAccent3 and EstVMaleAccent3 (female low/KO downreg, male high/KO upreg)	285	3160	1.12282e-17	1.94665	6.31071e-19	81.578	CYFIP1;TRIO;IPP;CCNC;IKZF2;PREX2;PPP2R1A;GPBP1;DPYSL3;CHORDC1;GLUL;SOX5;PAQR8;MED1;UNC13C;PRKAB2;PRKCI;PHKA1;MMD2;ANK2;SOX11;ANK3;RC3H2;THAP2;ATG12;XRN2;SIK3;SUCLG2;RELCH;HECA;KCTD12;ATF6;ALDH7A1;CLOCK;SMIM3;NECAB1;SDC4;MYCBP2;NEDD4L;MTMR4;SMIM7;GIGYF2;SULT1A1;MAP2;DHX36;RIMKLB;SCAI;ZRANB3;GSTM3;CREBBP;FZD3;DTNA;HOMER1;NEBL;TIPARP;EDEM1;INTS2;PRRC2C;PUM1;PRDX6;PBX1;DCLK1;ST18;PUM2;SLC6A8;MYO5B;AG…
Down-regulated Genes In Cortex Of 10 Mon HD Q140 Mice Vs Q20 GSE78272	HDSigDB 2021	DiestVMaleAccent1 (Diestrus vs Male, female high/KO upreg, male low/KO downreg)	70	387	1.25479e-17	3.9799	7.15088e-19	166.288	ANKRD13C;AHCYL1;HIP1;FAM107A;ARRB1;KLHDC7A;CROT;ARHGAP5;PITPNC1;DUSP11;DOCK10;SPRED1;SIPA1L1;ZMIZ1;PPP4R4;TRIM2;ZMYM6;LUC7L;TNPO1;TEAD1;GLUL;TIMP4;PPP1R16B;PAQR8;ZHX3;ACOT11;DIO2;AMT;PHKA1;ASRGL1;LZTFL1;TANC1;DNAJC1;DDAH1;GFOD1;LIX1;PXDN;SELENOP;SREK1;RIN2;CHST2;JCAD;SMIM3;SLC1A2;NEDD4L;HTT;NDRG2;NWD1;MAP2;CAMK2N1;UBR5;MAPK4;SASH1;RNF20;DTNA;HOMER2;RASL10B;KLHL3;BAIAP2;SMAD5;ST18;ETNPPL;PDP1;FMNL…
Genes Down-Regulated In Influence Of Hdac4 Reduction On Expression In 9 Wk R6/2 HD Mice GSE38218	HDSigDB 2021	DiestVMaleAccent1 (Diestrus vs Male, female high/KO upreg, male low/KO downreg)	62	313	1.25479e-17	4.43338	7.16093e-19	185.229	ITSN2;CDKN1B;WIPF2;USP34;PTEN;UBE3A;RORB;DUSP18;YY1;RO60;SPRED1;LUC7L;PLXNC1;AGFG1;USP8;RALGAPA1;MAGI2;USP45;SOX11;ANK3;ASH1L;PROX1;LZTFL1;ZEB1;CREB1;TBL1XR1;RUFY3;XPR1;HDAC4;NECAB1;KMT2A;ROCK1;NEDD4L;RASAL2;FGD4;BCLAF1;ZKSCAN8;TRA2A;CREBBP;FZD3;TCAF1;DTNA;CBX5;CEP350;MGA;YLPM1;PRRC2C;HELZ;HOOK3;PUM1;MIB1;CNOT4;DIAPH2;PDE10A;AGO3;APC;NEDD4;TAOK1;VPS41;CDK12;EIF3A;CPEB4
Down-regulated Genes In Cortex Of 10 Mon HD Q140 Mice Vs Q20 GSE78272	HDSigDB 2021	Union of DiestVMaleAccent3 and EstVMaleAccent3 (female low/KO downreg, male high/KO upreg)	70	387	1.25479e-17	3.9799	7.15088e-19	166.288	ANKRD13C;AHCYL1;HIP1;FAM107A;ARRB1;KLHDC7A;CROT;ARHGAP5;PITPNC1;DUSP11;DOCK10;SPRED1;SIPA1L1;ZMIZ1;PPP4R4;TRIM2;ZMYM6;LUC7L;TNPO1;TEAD1;GLUL;TIMP4;PPP1R16B;PAQR8;ZHX3;ACOT11;DIO2;AMT;PHKA1;ASRGL1;LZTFL1;TANC1;DNAJC1;DDAH1;GFOD1;LIX1;PXDN;SELENOP;SREK1;RIN2;CHST2;JCAD;SMIM3;SLC1A2;NEDD4L;HTT;NDRG2;NWD1;MAP2;CAMK2N1;UBR5;MAPK4;SASH1;RNF20;DTNA;HOMER2;RASL10B;KLHL3;BAIAP2;SMAD5;ST18;ETNPPL;PDP1;FMNL…
Genes Down-Regulated In Influence Of Hdac4 Reduction On Expression In 9 Wk R6/2 HD Mice GSE38218	HDSigDB 2021	Union of DiestVMaleAccent3 and EstVMaleAccent3 (female low/KO downreg, male high/KO upreg)	62	313	1.25479e-17	4.43338	7.16093e-19	185.229	ITSN2;CDKN1B;WIPF2;USP34;PTEN;UBE3A;RORB;DUSP18;YY1;RO60;SPRED1;LUC7L;PLXNC1;AGFG1;USP8;RALGAPA1;MAGI2;USP45;SOX11;ANK3;ASH1L;PROX1;LZTFL1;ZEB1;CREB1;TBL1XR1;RUFY3;XPR1;HDAC4;NECAB1;KMT2A;ROCK1;NEDD4L;RASAL2;FGD4;BCLAF1;ZKSCAN8;TRA2A;CREBBP;FZD3;TCAF1;DTNA;CBX5;CEP350;MGA;YLPM1;PRRC2C;HELZ;HOOK3;PUM1;MIB1;CNOT4;DIAPH2;PDE10A;AGO3;APC;NEDD4;TAOK1;VPS41;CDK12;EIF3A;CPEB4
Genes Up-Regulated In Expression In Expanded CAG Repeats Vs Control ESCs After 6D Of Neuronal Differentiation GSE9760	HDSigDB 2021	DiestVMaleAccent1 (Diestrus vs Male, female high/KO upreg, male low/KO downreg)	127	1011	1.56829e-17	2.65722	9.01781e-19	110.407	CYFIP2;RAB3C;TRIO;PANK3;PLEKHB2;NEXMIF;DOCK10;RIMS1;ALKBH5;TATDN1;ATCAY;DPYSL3;SCMH1;SLC16A7;RGS8;SOX6;SOX5;MED1;USP8;TMOD2;PHKA1;SOX11;MYT1;RC3H2;SNHG14;PPP1R3C;RUFY3;RELCH;SLC25A53;CLOCK;XPR1;INO80D;STXBP4;LYPD1;SLC1A2;NEDD4L;LIN7A;RASAL2;MTMR4;SMIM7;PLCXD2;TTBK2;FUT9;MAP2;ZMAT4;UBR5;NDP;SRGAP3;LRRC4C;ARGLU1;ZKSCAN1;SCAI;SRPK2;SPECC1;GSTM3;HOMER2;INTS2;RAB27B;HELZ;HOOK3;HSPA12A;PBX1;DCLK1;ARHGA…
Genes Up-Regulated In Expression In Expanded CAG Repeats Vs Control ESCs After 6D Of Neuronal Differentiation GSE9760	HDSigDB 2021	Union of DiestVMaleAccent3 and EstVMaleAccent3 (female low/KO downreg, male high/KO upreg)	127	1011	1.56829e-17	2.65722	9.01781e-19	110.407	CYFIP2;RAB3C;TRIO;PANK3;PLEKHB2;NEXMIF;DOCK10;RIMS1;ALKBH5;TATDN1;ATCAY;DPYSL3;SCMH1;SLC16A7;RGS8;SOX6;SOX5;MED1;USP8;TMOD2;PHKA1;SOX11;MYT1;RC3H2;SNHG14;PPP1R3C;RUFY3;RELCH;SLC25A53;CLOCK;XPR1;INO80D;STXBP4;LYPD1;SLC1A2;NEDD4L;LIN7A;RASAL2;MTMR4;SMIM7;PLCXD2;TTBK2;FUT9;MAP2;ZMAT4;UBR5;NDP;SRGAP3;LRRC4C;ARGLU1;ZKSCAN1;SCAI;SRPK2;SPECC1;GSTM3;HOMER2;INTS2;RAB27B;HELZ;HOOK3;HSPA12A;PBX1;DCLK1;ARHGA…
pnVLMC Post-Natal Vascular And Leptomeningeal Cell-Enriched Genes PMID30078729	HDSigDB 2021	DiestVMaleAccent1 (Diestrus vs Male, female high/KO upreg, male low/KO downreg)	333	3905	2.32684e-17	1.8605	1.34802e-18	76.5555	CYFIP2;CYFIP1;NCKAP1;CHIC1;GMFB;AHCYL1;TRIO;PANK3;SPARC;TRRAP;WIPF2;ARAF;ABAT;MSANTD4;NUDT5;ACTB;ALKBH5;RNF114;ZMIZ1;PPP2R1A;DPYSL3;CHORDC1;PLCE1;LUC7L;CIAO2A;SOX6;GLUL;RFX3;FRS2;ANK2;SOX11;ANK3;RC3H2;ASRGL1;ATG12;SNHG14;XRN1;WDR82;XRN2;TCEANC2;SUCLG2;ATF6;ALDH7A1;SET;MEAF6;EPAS1;MAGED1;MYCBP2;NEDD4L;BAZ2A;PIK3R1;MTMR4;SMIM7;GIGYF2;TTBK2;LARP1;MAP2;PRKAR2A;RAD21;DHX36;DPH3;MCMBP;RIMKLB;ARGLU1;SCA…
pnVLMC Post-Natal Vascular And Leptomeningeal Cell-Enriched Genes PMID30078729	HDSigDB 2021	Union of DiestVMaleAccent3 and EstVMaleAccent3 (female low/KO downreg, male high/KO upreg)	333	3905	2.32684e-17	1.8605	1.34802e-18	76.5555	CYFIP2;CYFIP1;NCKAP1;CHIC1;GMFB;AHCYL1;TRIO;PANK3;SPARC;TRRAP;WIPF2;ARAF;ABAT;MSANTD4;NUDT5;ACTB;ALKBH5;RNF114;ZMIZ1;PPP2R1A;DPYSL3;CHORDC1;PLCE1;LUC7L;CIAO2A;SOX6;GLUL;RFX3;FRS2;ANK2;SOX11;ANK3;RC3H2;ASRGL1;ATG12;SNHG14;XRN1;WDR82;XRN2;TCEANC2;SUCLG2;ATF6;ALDH7A1;SET;MEAF6;EPAS1;MAGED1;MYCBP2;NEDD4L;BAZ2A;PIK3R1;MTMR4;SMIM7;GIGYF2;TTBK2;LARP1;MAP2;PRKAR2A;RAD21;DHX36;DPH3;MCMBP;RIMKLB;ARGLU1;SCA…
STAT3 SIRNA HCC70 HUMAN GSE85579 RNASEQ DOWN	Lit Mined TF Perturbation Signatures	DiestVMaleAccent1 (Diestrus vs Male, female high/KO upreg, male low/KO downreg)	71	377	2.49388e-17	4.18841	3.83477e-20	187.254	NCKAP1;SMG1;AHCYL1;PANK3;TRIO;B4GALT1;DDX3X;CSE1L;CLTC;SETD7;EPRS;ARHGAP5;AFF4;ARHGAP35;AMOT;NIPBL;XPO1;ZMIZ1;SLC16A7;TNPO1;GLUL;NCOA2;PRKCI;ARHGEF12;VPS13C;TSC22D2;AP1B1;MRTFB;CKAP5;ARID1B;RC3H2;UHMK1;PTBP3;XRN1;TBL1XR1;PXDN;EPAS1;PURB;LARP1;CCDC85C;RAD21;UBR5;UBQLN1;EIF4EBP2;SKIL;RANBP2;ARFGEF1;CBX5;HOMER2;WWP1;PUM1;GNG12;HIPK1;EEF2;PHC3;AZIN1;MED13L;MIB1;MKLN1;DIAPH1;PLCXD3;CNOT1;MYO5B;AGO1;TA…
STAT3 SIRNA HCC70 HUMAN GSE85579 RNASEQ DOWN	Lit Mined TF Perturbation Signatures	EstVMaleAccent1 (Estrus vs Male, female high/KO upreg, male low/KO downreg)	71	377	2.49388e-17	4.18841	3.83477e-20	187.254	NCKAP1;SMG1;AHCYL1;PANK3;TRIO;B4GALT1;DDX3X;CSE1L;CLTC;SETD7;EPRS;ARHGAP5;AFF4;ARHGAP35;AMOT;NIPBL;XPO1;ZMIZ1;SLC16A7;TNPO1;GLUL;NCOA2;PRKCI;ARHGEF12;VPS13C;TSC22D2;AP1B1;MRTFB;CKAP5;ARID1B;RC3H2;UHMK1;PTBP3;XRN1;TBL1XR1;PXDN;EPAS1;PURB;LARP1;CCDC85C;RAD21;UBR5;UBQLN1;EIF4EBP2;SKIL;RANBP2;ARFGEF1;CBX5;HOMER2;WWP1;PUM1;GNG12;HIPK1;EEF2;PHC3;AZIN1;MED13L;MIB1;MKLN1;DIAPH1;PLCXD3;CNOT1;MYO5B;AGO1;TA…
STAT3 SIRNA HCC70 HUMAN GSE85579 RNASEQ DOWN	Lit Mined TF Perturbation Signatures	DiestVMaleAccent3 (Diestrus vs Male, female low/KO downreg, male high/KO upreg)	71	377	2.49388e-17	4.18841	3.83477e-20	187.254	NCKAP1;SMG1;AHCYL1;PANK3;TRIO;B4GALT1;DDX3X;CSE1L;CLTC;SETD7;EPRS;ARHGAP5;AFF4;ARHGAP35;AMOT;NIPBL;XPO1;ZMIZ1;SLC16A7;TNPO1;GLUL;NCOA2;PRKCI;ARHGEF12;VPS13C;TSC22D2;AP1B1;MRTFB;CKAP5;ARID1B;RC3H2;UHMK1;PTBP3;XRN1;TBL1XR1;PXDN;EPAS1;PURB;LARP1;CCDC85C;RAD21;UBR5;UBQLN1;EIF4EBP2;SKIL;RANBP2;ARFGEF1;CBX5;HOMER2;WWP1;PUM1;GNG12;HIPK1;EEF2;PHC3;AZIN1;MED13L;MIB1;MKLN1;DIAPH1;PLCXD3;CNOT1;MYO5B;AGO1;TA…
Expression In Ctip2 Null Vs WT Mouse Striatum GSE9330	HDSigDB 2021	DiestVMaleAccent1 (Diestrus vs Male, female high/KO upreg, male low/KO downreg)	169	1547	2.7241e-17	2.30558	1.58994e-18	94.4893	RAB3C;OXNAD1;AHCYL1;TRIO;GDA;TRRAP;NEXMIF;FMR1;PRDM2;YY1;RIMS1;SESN3;DPYSL5;ZMIZ1;DPYSL3;LUC7L;TNR;PLS3;PLXNC1;RGS8;SOX6;GLUL;PKNOX2;MAP3K5;NSF;PHYH;EIF1AX;TMOD2;ANK2;SOX11;ANK3;TUG1;RC3H2;ASRGL1;LZTFL1;DCTD;SNHG14;RUFY3;UBE2V2;RELCH;HECA;XPR1;ATP6V1A;DNMT1;BHLHB9;MYCBP2;GMPS;SLC1A2;NEDD4L;PIK3R1;PDS5B;RASAL2;PLA2G6;GIGYF2;EPB41L5;LARP1;MAP2;PRKAR2A;RAD21;ZMAT4;DPH3;G3BP2;MAP4;DECR2;RIMKLB;RAB6B;…
Expression In Ctip2 Null Vs WT Mouse Striatum GSE9330	HDSigDB 2021	Union of DiestVMaleAccent3 and EstVMaleAccent3 (female low/KO downreg, male high/KO upreg)	169	1547	2.7241e-17	2.30558	1.58994e-18	94.4893	RAB3C;OXNAD1;AHCYL1;TRIO;GDA;TRRAP;NEXMIF;FMR1;PRDM2;YY1;RIMS1;SESN3;DPYSL5;ZMIZ1;DPYSL3;LUC7L;TNR;PLS3;PLXNC1;RGS8;SOX6;GLUL;PKNOX2;MAP3K5;NSF;PHYH;EIF1AX;TMOD2;ANK2;SOX11;ANK3;TUG1;RC3H2;ASRGL1;LZTFL1;DCTD;SNHG14;RUFY3;UBE2V2;RELCH;HECA;XPR1;ATP6V1A;DNMT1;BHLHB9;MYCBP2;GMPS;SLC1A2;NEDD4L;PIK3R1;PDS5B;RASAL2;PLA2G6;GIGYF2;EPB41L5;LARP1;MAP2;PRKAR2A;RAD21;ZMAT4;DPH3;G3BP2;MAP4;DECR2;RIMKLB;RAB6B;…
HD Grade 3 Markers In Human Caudate Nucleus (HG-U133A) GSE3790	HDSigDB 2021	DiestVMaleAccent1 (Diestrus vs Male, female high/KO upreg, male low/KO downreg)	217	2202	3.44548e-17	2.09167	2.02588e-18	85.2158	ITSN2;CYFIP2;CYFIP1;AHCYL1;SPARC;PLEKHB2;FRMPD4;RNF114;PPP2R1A;DPYSL3;CHORDC1;PLCE1;GLUL;SOX5;SAP30BP;MRTFB;ANK2;SOX11;HPCAL4;BCR;RUFY3;SIK3;HECA;KCTD12;ATF6;RIN2;ALDH7A1;TMEM87A;SDC4;MAOB;AGAP2;NEDD4L;PIK3R1;IQGAP2;MAP2;MAP4;EGR3;DTNA;HOMER1;NEBL;TIPARP;IQSEC3;PRRC2C;HSPA12A;GNG12;PRDX6;DCLK1;ST18;MED13L;AGO3;NMT1;CDK14;PAM;PHF3;CSRNP3;BTG1;ARHGAP5;OSBPL11;NIPBL;SIPA1L1;NCS1;ZMYM6;IDS;ZCCHC24;ZH…
HD Grade 3 Markers In Human Caudate Nucleus (HG-U133A) GSE3790	HDSigDB 2021	Union of DiestVMaleAccent3 and EstVMaleAccent3 (female low/KO downreg, male high/KO upreg)	217	2202	3.44548e-17	2.09167	2.02588e-18	85.2158	ITSN2;CYFIP2;CYFIP1;AHCYL1;SPARC;PLEKHB2;FRMPD4;RNF114;PPP2R1A;DPYSL3;CHORDC1;PLCE1;GLUL;SOX5;SAP30BP;MRTFB;ANK2;SOX11;HPCAL4;BCR;RUFY3;SIK3;HECA;KCTD12;ATF6;RIN2;ALDH7A1;TMEM87A;SDC4;MAOB;AGAP2;NEDD4L;PIK3R1;IQGAP2;MAP2;MAP4;EGR3;DTNA;HOMER1;NEBL;TIPARP;IQSEC3;PRRC2C;HSPA12A;GNG12;PRDX6;DCLK1;ST18;MED13L;AGO3;NMT1;CDK14;PAM;PHF3;CSRNP3;BTG1;ARHGAP5;OSBPL11;NIPBL;SIPA1L1;NCS1;ZMYM6;IDS;ZCCHC24;ZH…
Genes Up-Regulated In Endothelial Cells Of zQ175DN Vs WT PMID32681824	HDSigDB 2021	DiestVMaleAccent1 (Diestrus vs Male, female high/KO upreg, male low/KO downreg)	78	477	5.55178e-17	3.53523	3.28835e-18	142.315	NCKAP1;THRB;DGKB;CTNND2;UBE3A;PITPNC1;DCAF6;PREX2;RIMS1;SCMH1;CHORDC1;REV3L;PHACTR1;ERC2;KPNA1;SOX5;RBM33;MEF2A;USP46;MED1;RALGAPA1;MAGI2;USP45;MSL2;RFX3;ANK2;ASH1L;ANK3;ARID1B;IMPACT;ZEB1;LRRC7;NME7;LCOR;PKP4;SREK1;RIN2;INO80D;KMT2A;ROCK2;KMT2C;MYCBP2;AKAP6;PDS5A;FAM117B;CAMSAP2;MAP2;SNTG1;UBN1;SRGAP3;LRRC4C;PAK3;CLASP2;USP25;CREBBP;UBE2H;CPSF6;NEBL;SMARCA5;WWP1;KLHL2;SORBS2;CDC42BPA;PUM1;PBX1;M…
Genes Up-Regulated In Endothelial Cells Of zQ175DN Vs WT PMID32681824	HDSigDB 2021	Union of DiestVMaleAccent3 and EstVMaleAccent3 (female low/KO downreg, male high/KO upreg)	78	477	5.55178e-17	3.53523	3.28835e-18	142.315	NCKAP1;THRB;DGKB;CTNND2;UBE3A;PITPNC1;DCAF6;PREX2;RIMS1;SCMH1;CHORDC1;REV3L;PHACTR1;ERC2;KPNA1;SOX5;RBM33;MEF2A;USP46;MED1;RALGAPA1;MAGI2;USP45;MSL2;RFX3;ANK2;ASH1L;ANK3;ARID1B;IMPACT;ZEB1;LRRC7;NME7;LCOR;PKP4;SREK1;RIN2;INO80D;KMT2A;ROCK2;KMT2C;MYCBP2;AKAP6;PDS5A;FAM117B;CAMSAP2;MAP2;SNTG1;UBN1;SRGAP3;LRRC4C;PAK3;CLASP2;USP25;CREBBP;UBE2H;CPSF6;NEBL;SMARCA5;WWP1;KLHL2;SORBS2;CDC42BPA;PUM1;PBX1;M…
Genes Down-Regulated In Foxp2/Olfm3-expressing Neurons Of HD Patients Vs Control PMID32681824	HDSigDB 2021	DiestVMaleAccent1 (Diestrus vs Male, female high/KO upreg, male low/KO downreg)	201	1993	6.88815e-17	2.13201	4.10966e-18	85.3512	ABAT;ACTB;ALKBH8;SYNGAP1;SCP2;DPYSL5;PPP4R4;CALN1;MEF2A;FRS2;MMD2;ANK3;MOSMO;XRN1;RUFY3;SIK3;ZFPM2;MTMR1;NECAB1;MAOB;MAGED1;AGAP2;NEDD4L;TMTC1;PIK3R1;MED12L;DHX36;STXBP5;RIMKLB;RAB11FIP4;SCAI;ZRANB3;GSTM3;FZD3;PHC1;HOMER1;EXOC6B;BBIP1;HSPA12A;PHC3;PBX1;DCLK1;FAM135B;AGO4;ECHDC1;RGL1;SFXN5;CPEB4;AHCTF1;NRSN1;CLTC;RSF1;SMG7;SIPA1L1;IDS;ACADM;PCMTD1;NCOA1;VAV3;ZHX3;WDR37;STRBP;PHF20L1;CNKSR2;ARHGEF9…
Genes Down-Regulated In Foxp2/Olfm3-expressing Neurons Of HD Patients Vs Control PMID32681824	HDSigDB 2021	Union of DiestVMaleAccent3 and EstVMaleAccent3 (female low/KO downreg, male high/KO upreg)	201	1993	6.88815e-17	2.13201	4.10966e-18	85.3512	ABAT;ACTB;ALKBH8;SYNGAP1;SCP2;DPYSL5;PPP4R4;CALN1;MEF2A;FRS2;MMD2;ANK3;MOSMO;XRN1;RUFY3;SIK3;ZFPM2;MTMR1;NECAB1;MAOB;MAGED1;AGAP2;NEDD4L;TMTC1;PIK3R1;MED12L;DHX36;STXBP5;RIMKLB;RAB11FIP4;SCAI;ZRANB3;GSTM3;FZD3;PHC1;HOMER1;EXOC6B;BBIP1;HSPA12A;PHC3;PBX1;DCLK1;FAM135B;AGO4;ECHDC1;RGL1;SFXN5;CPEB4;AHCTF1;NRSN1;CLTC;RSF1;SMG7;SIPA1L1;IDS;ACADM;PCMTD1;NCOA1;VAV3;ZHX3;WDR37;STRBP;PHF20L1;CNKSR2;ARHGEF9…
Synaptic Neuropil Transcriptome PMID22578497	HDSigDB 2021	DiestVMaleAccent1 (Diestrus vs Male, female high/KO upreg, male low/KO downreg)	241	2557	7.05299e-17	2.00652	4.2385e-18	80.2654	ITSN2;CYFIP1;NCKAP1;MTRR;ZFYVE9;FRMPD4;ACTB;ALKBH8;SYNGAP1;PPP2R1A;CHORDC1;CDK5RAP1;CALN1;PRKAB2;SAP30BP;PRKCI;AP1B1;FRS2;MMD2;ANK2;HPCAL4;ATG12;UHMK1;STX1B;XRN2;TMEM126B;MTMR1;TMEM87A;NECAB1;LXN;PDE1A;MYCBP2;LYPD1;NEDD4L;PIK3R1;PLA2G6;MAP2;DHX36;STXBP5;ARGLU1;RAB11FIP4;SRPK2;HOMER1;HOMER2;NCAPH2;IQSEC3;PRRC2C;HSPA12A;PUM1;DCLK1;PUM2;CCDC88A;LAS1L;MYO5B;NMT1;FXYD6;CDK14;CPEB4;CDK16;NRSN1;PHF20;OS…
Synaptic Neuropil Transcriptome PMID22578497	HDSigDB 2021	Union of DiestVMaleAccent3 and EstVMaleAccent3 (female low/KO downreg, male high/KO upreg)	241	2557	7.05299e-17	2.00652	4.2385e-18	80.2654	ITSN2;CYFIP1;NCKAP1;MTRR;ZFYVE9;FRMPD4;ACTB;ALKBH8;SYNGAP1;PPP2R1A;CHORDC1;CDK5RAP1;CALN1;PRKAB2;SAP30BP;PRKCI;AP1B1;FRS2;MMD2;ANK2;HPCAL4;ATG12;UHMK1;STX1B;XRN2;TMEM126B;MTMR1;TMEM87A;NECAB1;LXN;PDE1A;MYCBP2;LYPD1;NEDD4L;PIK3R1;PLA2G6;MAP2;DHX36;STXBP5;ARGLU1;RAB11FIP4;SRPK2;HOMER1;HOMER2;NCAPH2;IQSEC3;PRRC2C;HSPA12A;PUM1;DCLK1;PUM2;CCDC88A;LAS1L;MYO5B;NMT1;FXYD6;CDK14;CPEB4;CDK16;NRSN1;PHF20;OS…
The Global Ubiquitinome Data Of The Soluble Fraction From The Brains Of Q175 And WT Mice PMID31138642	HDSigDB 2021	DiestVMaleAccent1 (Diestrus vs Male, female high/KO upreg, male low/KO downreg)	95	660	7.58268e-17	3.06432	4.58961e-18	122.336	NCKAP1;PYGB;RAB3C;CHIC1;AHCYL1;GDA;CTNND2;CLTC;USP34;UBE3A;ACTB;UBE2L3;XPO1;DPYSL5;PPP2R1A;DPYSL3;KIF5A;TRAPPC13;GLUL;KPNA1;NSF;PRMT5;PEG3;AP1B1;ANK2;KCNAB2;ANK3;SMC1A;HPCAL4;DYNLL2;RBSN;TOMM40L;EEF1G;STX1B;IMPACT;VAMP7;GFOD1;SNPH;RUFY3;EEF1A2;SIK3;UBE2V2;ELMO2;ACSBG1;ALDOC;PAFAH1B1;ATP6V1A;NAPB;DNMT1;PDXK;SET;CUL5;MGRN1;USO1;CAMK2A;GMPS;DCUN1D1;SLC1A2;NEDD4L;HTT;LIN7A;NDRG2;PAK1;MAP2;PRKAR2A;GNG…
The Global Ubiquitinome Data Of The Soluble Fraction From The Brains Of Q175 And WT Mice PMID31138642	HDSigDB 2021	Union of DiestVMaleAccent3 and EstVMaleAccent3 (female low/KO downreg, male high/KO upreg)	95	660	7.58268e-17	3.06432	4.58961e-18	122.336	NCKAP1;PYGB;RAB3C;CHIC1;AHCYL1;GDA;CTNND2;CLTC;USP34;UBE3A;ACTB;UBE2L3;XPO1;DPYSL5;PPP2R1A;DPYSL3;KIF5A;TRAPPC13;GLUL;KPNA1;NSF;PRMT5;PEG3;AP1B1;ANK2;KCNAB2;ANK3;SMC1A;HPCAL4;DYNLL2;RBSN;TOMM40L;EEF1G;STX1B;IMPACT;VAMP7;GFOD1;SNPH;RUFY3;EEF1A2;SIK3;UBE2V2;ELMO2;ACSBG1;ALDOC;PAFAH1B1;ATP6V1A;NAPB;DNMT1;PDXK;SET;CUL5;MGRN1;USO1;CAMK2A;GMPS;DCUN1D1;SLC1A2;NEDD4L;HTT;LIN7A;NDRG2;PAK1;MAP2;PRKAR2A;GNG…
Genes Down-Regulated In Expression In Skeletal Muscle Of HSALR 20B Myotonic Dystrophy Mice GSE24920	HDSigDB 2021	DiestVMaleAccent1 (Diestrus vs Male, female high/KO upreg, male low/KO downreg)	212	2151	9.07456e-17	2.08585	5.53183e-18	82.8832	TRIO;MTRR;PLEKHB2;ZFYVE9;WIPF2;ALKBH8;UBE2L3;DCAF6;ALKBH5;SOX6;UNC13C;PRKAB2;PHKA1;ANK2;ANK3;RC3H2;ASRGL1;AR;PPP1R3C;RUFY3;TMEM126B;MAOB;STXBP4;DCUN1D1;NOLC1;NEDD4L;BAZ2A;TMTC1;PLA2G6;TTBK2;EPB41L5;LARP1;MAP2;PRKAR2A;STXBP5;SRPK2;GSTM3;CREBBP;GSTM1;DTNA;HOMER1;HOMER2;ACADSB;PUM2;PEX5L;SLC6A8;AGO4;AGO2;ECHDC1;GSTM5;CPEB4;TOP2B;LRSAM1;AHCTF1;CITED2;SETD7;ADK;PYGM;RSF1;CROT;METTL11B;ARHGAP5;NIPBL;NH…
Genes Down-Regulated In Expression In Skeletal Muscle Of HSALR 20B Myotonic Dystrophy Mice GSE24920	HDSigDB 2021	Union of DiestVMaleAccent3 and EstVMaleAccent3 (female low/KO downreg, male high/KO upreg)	212	2151	9.07456e-17	2.08585	5.53183e-18	82.8832	TRIO;MTRR;PLEKHB2;ZFYVE9;WIPF2;ALKBH8;UBE2L3;DCAF6;ALKBH5;SOX6;UNC13C;PRKAB2;PHKA1;ANK2;ANK3;RC3H2;ASRGL1;AR;PPP1R3C;RUFY3;TMEM126B;MAOB;STXBP4;DCUN1D1;NOLC1;NEDD4L;BAZ2A;TMTC1;PLA2G6;TTBK2;EPB41L5;LARP1;MAP2;PRKAR2A;STXBP5;SRPK2;GSTM3;CREBBP;GSTM1;DTNA;HOMER1;HOMER2;ACADSB;PUM2;PEX5L;SLC6A8;AGO4;AGO2;ECHDC1;GSTM5;CPEB4;TOP2B;LRSAM1;AHCTF1;CITED2;SETD7;ADK;PYGM;RSF1;CROT;METTL11B;ARHGAP5;NIPBL;NH…
Mouse Cerebellum Granule Cell Markers PMID19013282	HDSigDB 2021	DiestVMaleAccent1 (Diestrus vs Male, female high/KO upreg, male low/KO downreg)	266	2931	1.09583e-16	1.94054	6.72756e-18	76.7297	CYFIP2;CHIC1;TRIO;ZFYVE9;KANTR;ZMIZ1;PPP2R1A;LUC7L;CALN1;MEF2A;MED1;UNC13C;SAP30BP;PRKCI;MRTFB;ANK3;RC3H2;STX1B;MARF1;WDR82;SIK3;ATF7;RELCH;ZFPM2;MTMR1;MYCBP2;DCUN1D1;NOLC1;NEDD4L;BAZ2A;PIK3R1;DPH3;STXBP5;SCAI;PCK2;CREBBP;HOMER1;NCAPH2;SMARCA5;PRRC2C;PUM1;DCLK1;ST18;FOSL2;AGO4;AGO1;NMT1;FXYD6;CDK12;EZH1;CPEB4;CDK16;PHF3;HBS1L;SETD2;BTG1;PHF20;CITED2;SMG7;PCMTD2;NIPBL;NHSL1;NKRF;DENND11;NCS1;REV3L…
Mouse Cerebellum Granule Cell Markers PMID19013282	HDSigDB 2021	Union of DiestVMaleAccent3 and EstVMaleAccent3 (female low/KO downreg, male high/KO upreg)	266	2931	1.09583e-16	1.94054	6.72756e-18	76.7297	CYFIP2;CHIC1;TRIO;ZFYVE9;KANTR;ZMIZ1;PPP2R1A;LUC7L;CALN1;MEF2A;MED1;UNC13C;SAP30BP;PRKCI;MRTFB;ANK3;RC3H2;STX1B;MARF1;WDR82;SIK3;ATF7;RELCH;ZFPM2;MTMR1;MYCBP2;DCUN1D1;NOLC1;NEDD4L;BAZ2A;PIK3R1;DPH3;STXBP5;SCAI;PCK2;CREBBP;HOMER1;NCAPH2;SMARCA5;PRRC2C;PUM1;DCLK1;ST18;FOSL2;AGO4;AGO1;NMT1;FXYD6;CDK12;EZH1;CPEB4;CDK16;PHF3;HBS1L;SETD2;BTG1;PHF20;CITED2;SMG7;PCMTD2;NIPBL;NHSL1;NKRF;DENND11;NCS1;REV3L…
Alzheimer Disease Up-Regulated Genes In CA1 Area Of Hippocampus Liang PMID18270320	HDSigDB 2021	DiestVMaleAccent1 (Diestrus vs Male, female high/KO upreg, male low/KO downreg)	148	1300	1.29864e-16	2.39244	8.02879e-18	94.1749	OTUD4;DGKG;TRIO;UBE3A;ABAT;IPO7;YY1;SLC16A7;EP300;KMT5A;TBC1D22A;AGFG1;PPP1R16B;EIF1AX;MAGI2;FBXO11;ATG12;UHMK1;MOSMO;WDR82;DOK6;PKP4;KCTD12;KMT2A;MAX;KMT2C;MYCBP2;ANKRD12;TTBK2;PRKAR2A;UBR5;G3BP2;MCMBP;CREBBP;ACBD5;DTNA;CBX5;HOMER1;CEP350;IQSEC3;PRRC2C;IRF2BP2;KLHL24;SMAD5;ARHGAP33;MFHAS1;DIAPH1;AGO3;GNAQ;PDCL;TCF4;CDK12;RGL1;CDK14;CPEB4;RBM27;PHF3;TOP2B;SMG1;SETD2;AHCTF1;CSRNP3;PHF20;CELF5;RSF1…
Alzheimer Disease Up-Regulated Genes In CA1 Area Of Hippocampus Liang PMID18270320	HDSigDB 2021	Union of DiestVMaleAccent3 and EstVMaleAccent3 (female low/KO downreg, male high/KO upreg)	148	1300	1.29864e-16	2.39244	8.02879e-18	94.1749	OTUD4;DGKG;TRIO;UBE3A;ABAT;IPO7;YY1;SLC16A7;EP300;KMT5A;TBC1D22A;AGFG1;PPP1R16B;EIF1AX;MAGI2;FBXO11;ATG12;UHMK1;MOSMO;WDR82;DOK6;PKP4;KCTD12;KMT2A;MAX;KMT2C;MYCBP2;ANKRD12;TTBK2;PRKAR2A;UBR5;G3BP2;MCMBP;CREBBP;ACBD5;DTNA;CBX5;HOMER1;CEP350;IQSEC3;PRRC2C;IRF2BP2;KLHL24;SMAD5;ARHGAP33;MFHAS1;DIAPH1;AGO3;GNAQ;PDCL;TCF4;CDK12;RGL1;CDK14;CPEB4;RBM27;PHF3;TOP2B;SMG1;SETD2;AHCTF1;CSRNP3;PHF20;CELF5;RSF1…
Genes Changed In Mural Cells Of HD Patients Vs Control PMID32681824	HDSigDB 2021	DiestVMaleAccent1 (Diestrus vs Male, female high/KO upreg, male low/KO downreg)	119	947	1.98133e-16	2.64477	1.23351e-17	102.972	ALDH1L1;SPARC;DGKB;FGF1;ACTB;ARHGAP35;PREX2;YY1;DOCK10;RGS5;ZMIZ1;SCMH1;CHORDC1;PLCE1;PDE8B;GLUL;PKNOX2;NSF;MEF2C;MAGI2;DYRK1A;RFX3;BCR;MOSMO;TANC1;TBL1XR1;DOK6;SIK3;PKP4;RIN2;SMIM3;INO80D;EPAS1;STXBP4;KMT2C;PDE1A;ANKRD12;SLC1A2;LIN7A;TMTC1;PDS5B;RASAL2;FOXO3;NDRG2;PDS5A;MED12L;UBR5;MAP4;ARGLU1;MCL1;SRPK2;CREBBP;UBE2H;DTNA;PHF10;IRF2BP2;PRRC2C;KLHL24;HSPA12A;ARHGAP26;ST18;FOSL2;ARHGAP32;PEX5L;DLG…
Genes Changed In Mural Cells Of HD Patients Vs Control PMID32681824	HDSigDB 2021	Union of DiestVMaleAccent3 and EstVMaleAccent3 (female low/KO downreg, male high/KO upreg)	119	947	1.98133e-16	2.64477	1.23351e-17	102.972	ALDH1L1;SPARC;DGKB;FGF1;ACTB;ARHGAP35;PREX2;YY1;DOCK10;RGS5;ZMIZ1;SCMH1;CHORDC1;PLCE1;PDE8B;GLUL;PKNOX2;NSF;MEF2C;MAGI2;DYRK1A;RFX3;BCR;MOSMO;TANC1;TBL1XR1;DOK6;SIK3;PKP4;RIN2;SMIM3;INO80D;EPAS1;STXBP4;KMT2C;PDE1A;ANKRD12;SLC1A2;LIN7A;TMTC1;PDS5B;RASAL2;FOXO3;NDRG2;PDS5A;MED12L;UBR5;MAP4;ARGLU1;MCL1;SRPK2;CREBBP;UBE2H;DTNA;PHF10;IRF2BP2;PRRC2C;KLHL24;HSPA12A;ARHGAP26;ST18;FOSL2;ARHGAP32;PEX5L;DLG…
Genes Down-Regulated In Sst/Npy-expressing Interneurons Of zQ175DN Vs WT PMID32681824	HDSigDB 2021	DiestVMaleAccent1 (Diestrus vs Male, female high/KO upreg, male low/KO downreg)	70	408	2.18161e-16	3.72841	1.36763e-17	144.778	CYFIP2;RAB3C;GSK3B;AHCTF1;THRB;NEXMIF;ZCCHC18;CHD1;SH3RF1;PITPNC1;RPS6KA3;NIPBL;RIMS4;SENP5;PPP4R4;SCMH1;PHACTR3;ERC2;SPTAN1;MEF2A;NSF;ARHGEF12;ZFR;TMOD2;LARP4B;BCR;AR;NCOR1;ZEB1;PIK3CA;XRN1;RUFY3;XRN2;UBE2V2;LCOR;FAM193A;TBC1D23;PAFAH1B1;CAMK2A;HTT;SLAIN2;PDS5A;MED12L;ORC5;FGD4;CAMK2N1;KLHDC10;CLASP2;ARNT2;HSPA8;ACBD5;UBE2H;HOMER1;KCNIP3;GFPT1;PRRC2C;NMNAT2;PBX1;MED13L;PUM2;CNOT4;MKLN1;CCDC88A;G…
Genes Down-Regulated In Sst/Npy-expressing Interneurons Of zQ175DN Vs WT PMID32681824	HDSigDB 2021	Union of DiestVMaleAccent3 and EstVMaleAccent3 (female low/KO downreg, male high/KO upreg)	70	408	2.18161e-16	3.72841	1.36763e-17	144.778	CYFIP2;RAB3C;GSK3B;AHCTF1;THRB;NEXMIF;ZCCHC18;CHD1;SH3RF1;PITPNC1;RPS6KA3;NIPBL;RIMS4;SENP5;PPP4R4;SCMH1;PHACTR3;ERC2;SPTAN1;MEF2A;NSF;ARHGEF12;ZFR;TMOD2;LARP4B;BCR;AR;NCOR1;ZEB1;PIK3CA;XRN1;RUFY3;XRN2;UBE2V2;LCOR;FAM193A;TBC1D23;PAFAH1B1;CAMK2A;HTT;SLAIN2;PDS5A;MED12L;ORC5;FGD4;CAMK2N1;KLHDC10;CLASP2;ARNT2;HSPA8;ACBD5;UBE2H;HOMER1;KCNIP3;GFPT1;PRRC2C;NMNAT2;PBX1;MED13L;PUM2;CNOT4;MKLN1;CCDC88A;G…
Genes Changed In iSPNs Of zQ175DN Vs WT PMID32681824	HDSigDB 2021	DiestVMaleAccent1 (Diestrus vs Male, female high/KO upreg, male low/KO downreg)	86	574	2.52569e-16	3.19661	1.59426e-17	123.637	DGKG;NCKAP1;RAB3C;GSK3B;THRB;DGKB;LRRK2;CELF5;UBE3A;PPP1R9A;BICD1;PITPNC1;SYNE1;SPRED1;SIPA1L1;PPP4R4;SCMH1;PSD3;TNR;PHACTR1;ERC2;PDE8B;SPTAN1;PCMTD1;PPP1R16B;VAV3;UNC13C;CAMK1D;SGIP1;MAGI2;ANK2;PJA2;BCR;CNKSR2;DNAJC1;ZEB1;MMP16;SETBP1;LRRC7;DOK6;SIK3;ATF6;MGLL;JCAD;KDM7A;SHC3;ROCK2;CAMK2A;PRICKLE2;NEDD4L;AKAP6;RASAL2;IQGAP2;BTAF1;ATXN1;ZMAT4;GNG7;SRGAP3;ARGLU1;MAPK4;RANBP2;TCAF1;HOMER1;NEBL;KCNI…
Genes Changed In iSPNs Of zQ175DN Vs WT PMID32681824	HDSigDB 2021	Union of DiestVMaleAccent3 and EstVMaleAccent3 (female low/KO downreg, male high/KO upreg)	86	574	2.52569e-16	3.19661	1.59426e-17	123.637	DGKG;NCKAP1;RAB3C;GSK3B;THRB;DGKB;LRRK2;CELF5;UBE3A;PPP1R9A;BICD1;PITPNC1;SYNE1;SPRED1;SIPA1L1;PPP4R4;SCMH1;PSD3;TNR;PHACTR1;ERC2;PDE8B;SPTAN1;PCMTD1;PPP1R16B;VAV3;UNC13C;CAMK1D;SGIP1;MAGI2;ANK2;PJA2;BCR;CNKSR2;DNAJC1;ZEB1;MMP16;SETBP1;LRRC7;DOK6;SIK3;ATF6;MGLL;JCAD;KDM7A;SHC3;ROCK2;CAMK2A;PRICKLE2;NEDD4L;AKAP6;RASAL2;IQGAP2;BTAF1;ATXN1;ZMAT4;GNG7;SRGAP3;ARGLU1;MAPK4;RANBP2;TCAF1;HOMER1;NEBL;KCNI…
Genes Changed In Foxp2/Olfm3-expressing Neurons Of zQ175DN Vs WT PMID32681824	HDSigDB 2021	DiestVMaleAccent1 (Diestrus vs Male, female high/KO upreg, male low/KO downreg)	93	651	2.73381e-16	3.03257	1.73744e-17	117.032	ITSN2;RERE;GSK3B;TRIO;AHCYL1;THRB;FRMPD4;DGKB;LRRK2;CELF5;ABAT;UBE3A;AFF4;ACTB;PITPNC1;DCAF6;SYNE1;RPS6KA3;SPRED1;PPP4R4;KIF5A;TNR;PHACTR1;KDM6A;CAMK1D;MAGI2;ANK2;PJA2;BCR;CNKSR2;CREB1;MMP16;RUFY3;DOK6;EXOC4;SIK3;SREK1;ATF6;MGLL;SHANK2;NECAB1;KMT2A;ROCK2;PDE1A;CAMK2A;NEDD4L;TMTC1;NYAP2;CBL;PPM1E;BTAF1;ATXN1;MAP2;SNTG1;GNG7;UBR5;REPS2;STXBP5;SRGAP3;LRRC4C;PAK3;FNIP2;RANBP2;SPECC1;TCAF1;HOMER1;NEBL…
Genes Changed In Foxp2/Olfm3-expressing Neurons Of zQ175DN Vs WT PMID32681824	HDSigDB 2021	Union of DiestVMaleAccent3 and EstVMaleAccent3 (female low/KO downreg, male high/KO upreg)	93	651	2.73381e-16	3.03257	1.73744e-17	117.032	ITSN2;RERE;GSK3B;TRIO;AHCYL1;THRB;FRMPD4;DGKB;LRRK2;CELF5;ABAT;UBE3A;AFF4;ACTB;PITPNC1;DCAF6;SYNE1;RPS6KA3;SPRED1;PPP4R4;KIF5A;TNR;PHACTR1;KDM6A;CAMK1D;MAGI2;ANK2;PJA2;BCR;CNKSR2;CREB1;MMP16;RUFY3;DOK6;EXOC4;SIK3;SREK1;ATF6;MGLL;SHANK2;NECAB1;KMT2A;ROCK2;PDE1A;CAMK2A;NEDD4L;TMTC1;NYAP2;CBL;PPM1E;BTAF1;ATXN1;MAP2;SNTG1;GNG7;UBR5;REPS2;STXBP5;SRGAP3;LRRC4C;PAK3;FNIP2;RANBP2;SPECC1;TCAF1;HOMER1;NEBL…
Neuro2a Htt72Q-i Vs Htt25Q-ni PMID28743452	HDSigDB 2021	DiestVMaleAccent1 (Diestrus vs Male, female high/KO upreg, male low/KO downreg)	351	4258	3.57572e-16	1.79582	2.28797e-17	68.809	CYFIP2;IPO11;GMFB;TRIO;PANK3;PLEKHB2;CCNC;ABAT;IKZF2;ACTB;RPS6KA3;ALKBH5;SYNGAP1;PEG13;DPYSL5;PPP2R1A;PLCE1;CIAO2A;MED1;PRKCI;MRTFB;SOX11;ANK3;RC3H2;THAP2;ATG12;UHMK1;BCR;MOSMO;SNHG14;MARF1;PPP1R3C;WDR82;RELCH;ATF6;SMIM3;MTMR1;NECAB1;SET;STXBP4;MYCBP2;DCUN1D1;NOLC1;TMTC1;MTMR4;IQGAP2;LARP1;PRKAR2A;RAD21;DHX36;MCMBP;MAP4;ARGLU1;SCAI;ZRANB3;FZD3;GSTM1;PHC1;INTS2;PRRC2C;HSPA12A;PHC3;PBX1;ST18;MED13L…
Neuro2a Htt72Q-i Vs Htt25Q-ni PMID28743452	HDSigDB 2021	Union of DiestVMaleAccent3 and EstVMaleAccent3 (female low/KO downreg, male high/KO upreg)	351	4258	3.57572e-16	1.79582	2.28797e-17	68.809	CYFIP2;IPO11;GMFB;TRIO;PANK3;PLEKHB2;CCNC;ABAT;IKZF2;ACTB;RPS6KA3;ALKBH5;SYNGAP1;PEG13;DPYSL5;PPP2R1A;PLCE1;CIAO2A;MED1;PRKCI;MRTFB;SOX11;ANK3;RC3H2;THAP2;ATG12;UHMK1;BCR;MOSMO;SNHG14;MARF1;PPP1R3C;WDR82;RELCH;ATF6;SMIM3;MTMR1;NECAB1;SET;STXBP4;MYCBP2;DCUN1D1;NOLC1;TMTC1;MTMR4;IQGAP2;LARP1;PRKAR2A;RAD21;DHX36;MCMBP;MAP4;ARGLU1;SCAI;ZRANB3;FZD3;GSTM1;PHC1;INTS2;PRRC2C;HSPA12A;PHC3;PBX1;ST18;MED13L…
Cortex RNA M15 Module (Midnightblue) PMID26900923	HDSigDB 2021	DiestVMaleAccent1 (Diestrus vs Male, female high/KO upreg, male low/KO downreg)	74	452	3.60131e-16	3.53048	2.31991e-17	135.226	ANKRD13C;RBM27;PANK3;ZFYVE9;LRRK2;PTEN;RSF1;NUDT5;CDC73;FSD1L;XPO1;SENP5;NKRF;TRIM2;OSBP;KPNA6;ARIH1;ARID2;TNPO3;AGFG1;UPF2;CDADC1;PCYT1A;DESI2;DYRK1A;FAM126B;SIRT1;RC3H2;THAP2;LZTFL1;CREB1;PIK3CA;HECA;MTMR1;NUFIP2;ROCK2;ANKRD12;SLAIN2;UBFD1;RNF6;MIEF1;FAM117B;ARHGAP12;CAMSAP2;RMND5A;KIF3B;TNKS2;TRA2A;GPBP1L1;RPRD1B;KLHDC10;RANBP2;HSPA8;CPSF6;FEM1B;KLHL28;SMARCA5;TRAPPC8;TMEM64;AP2B1;MYO9A;SMAD5;…
Cortex RNA M15 Module (Midnightblue) PMID26900923	HDSigDB 2021	Union of DiestVMaleAccent3 and EstVMaleAccent3 (female low/KO downreg, male high/KO upreg)	74	452	3.60131e-16	3.53048	2.31991e-17	135.226	ANKRD13C;RBM27;PANK3;ZFYVE9;LRRK2;PTEN;RSF1;NUDT5;CDC73;FSD1L;XPO1;SENP5;NKRF;TRIM2;OSBP;KPNA6;ARIH1;ARID2;TNPO3;AGFG1;UPF2;CDADC1;PCYT1A;DESI2;DYRK1A;FAM126B;SIRT1;RC3H2;THAP2;LZTFL1;CREB1;PIK3CA;HECA;MTMR1;NUFIP2;ROCK2;ANKRD12;SLAIN2;UBFD1;RNF6;MIEF1;FAM117B;ARHGAP12;CAMSAP2;RMND5A;KIF3B;TNKS2;TRA2A;GPBP1L1;RPRD1B;KLHDC10;RANBP2;HSPA8;CPSF6;FEM1B;KLHL28;SMARCA5;TRAPPC8;TMEM64;AP2B1;MYO9A;SMAD5;…
GATA6 OE HESC HUMAN GSE69322 KSRMEDIA RNASEQ DOWN	Lit Mined TF Perturbation Signatures	DiestVMaleAccent1 (Diestrus vs Male, female high/KO upreg, male low/KO downreg)	77	456	3.91955e-16	3.67445	8.03598e-19	153.097	PHF3;NCKAP1;TOP2B;KDM5B;SMG1;SETD2;GMFB;PANK3;SPARC;HIP1;DDX3X;CSE1L;USP34;EPRS;IPO7;CHD1;IPO5;NARS;NIPBL;PTAR1;XPO1;SESN3;DPYSL5;TRIM2;DPYSL3;PLS3;IDS;CEP170;TNPO1;GLUL;PEG3;ZFR;SOX11;SMC1A;CKAP5;ILF3;NCOR1;XRN2;SREK1;BCAT1;SET;KMT2A;NUFIP2;SDC4;GLO1;PDS5A;EPB41L5;BCLAF1;LARP1;POLR2B;RAD21;ZKSCAN8;UBR5;G3BP2;EIF4B;MCL1;RANBP2;CPSF6;CBX5;CEP350;IDH1;SMARCA5;HUWE1;PRRC2C;NUP153;PBX1;PUM2;MIB1;CCDC…
GATA6 OE HESC HUMAN GSE69322 KSRMEDIA RNASEQ DOWN	Lit Mined TF Perturbation Signatures	EstVMaleAccent1 (Estrus vs Male, female high/KO upreg, male low/KO downreg)	77	456	3.91955e-16	3.67445	8.03598e-19	153.097	PHF3;NCKAP1;TOP2B;KDM5B;SMG1;SETD2;GMFB;PANK3;SPARC;HIP1;DDX3X;CSE1L;USP34;EPRS;IPO7;CHD1;IPO5;NARS;NIPBL;PTAR1;XPO1;SESN3;DPYSL5;TRIM2;DPYSL3;PLS3;IDS;CEP170;TNPO1;GLUL;PEG3;ZFR;SOX11;SMC1A;CKAP5;ILF3;NCOR1;XRN2;SREK1;BCAT1;SET;KMT2A;NUFIP2;SDC4;GLO1;PDS5A;EPB41L5;BCLAF1;LARP1;POLR2B;RAD21;ZKSCAN8;UBR5;G3BP2;EIF4B;MCL1;RANBP2;CPSF6;CBX5;CEP350;IDH1;SMARCA5;HUWE1;PRRC2C;NUP153;PBX1;PUM2;MIB1;CCDC…
GATA6 OE HESC HUMAN GSE69322 KSRMEDIA RNASEQ DOWN	Lit Mined TF Perturbation Signatures	DiestVMaleAccent3 (Diestrus vs Male, female low/KO downreg, male high/KO upreg)	77	456	3.91955e-16	3.67445	8.03598e-19	153.097	PHF3;NCKAP1;TOP2B;KDM5B;SMG1;SETD2;GMFB;PANK3;SPARC;HIP1;DDX3X;CSE1L;USP34;EPRS;IPO7;CHD1;IPO5;NARS;NIPBL;PTAR1;XPO1;SESN3;DPYSL5;TRIM2;DPYSL3;PLS3;IDS;CEP170;TNPO1;GLUL;PEG3;ZFR;SOX11;SMC1A;CKAP5;ILF3;NCOR1;XRN2;SREK1;BCAT1;SET;KMT2A;NUFIP2;SDC4;GLO1;PDS5A;EPB41L5;BCLAF1;LARP1;POLR2B;RAD21;ZKSCAN8;UBR5;G3BP2;EIF4B;MCL1;RANBP2;CPSF6;CBX5;CEP350;IDH1;SMARCA5;HUWE1;PRRC2C;NUP153;PBX1;PUM2;MIB1;CCDC…
Genes Up-Regulated In Succinate Dehydrogenase Inhibitor 3-NP Dependent Expression In WT Mouse Striatal Cells GSE3583	HDSigDB 2021	DiestVMaleAccent1 (Diestrus vs Male, female high/KO upreg, male low/KO downreg)	362	4440	4.79793e-16	1.78031	3.1115e-17	67.6673	NCKAP1;CHIC1;TRIO;MTRR;PLEKHB2;NUDT5;PREX2;RNF114;DPYSL3;LUC7L;GLUL;AGFG1;MEF2A;PAQR8;MED1;UNC13C;PRKAB2;PRKCI;MRTFB;ANK2;SOX11;ANK3;ASRGL1;ATG12;BCR;MOSMO;MARF1;RUFY3;XRN2;SIK3;RELCH;ZFPM2;ATF6;ALDH7A1;TMEM87A;SET;STXBP4;MYCBP2;DCUN1D1;MTMR9;NOLC1;PIK3R1;MTMR4;PLA2G6;IQGAP2;GIGYF2;EPB41L5;LARP1;MAP2;PRKAR2A;MAP4;SCAI;PCK2;SRPK2;GSTM3;EGR2;GSTM1;EGR3;DTNA;HOMER1;TIPARP;EDEM1;INTS2;SMARCA5;PRRC2C;…
Genes Up-Regulated In Succinate Dehydrogenase Inhibitor 3-NP Dependent Expression In WT Mouse Striatal Cells GSE3583	HDSigDB 2021	Union of DiestVMaleAccent3 and EstVMaleAccent3 (female low/KO downreg, male high/KO upreg)	362	4440	4.79793e-16	1.78031	3.1115e-17	67.6673	NCKAP1;CHIC1;TRIO;MTRR;PLEKHB2;NUDT5;PREX2;RNF114;DPYSL3;LUC7L;GLUL;AGFG1;MEF2A;PAQR8;MED1;UNC13C;PRKAB2;PRKCI;MRTFB;ANK2;SOX11;ANK3;ASRGL1;ATG12;BCR;MOSMO;MARF1;RUFY3;XRN2;SIK3;RELCH;ZFPM2;ATF6;ALDH7A1;TMEM87A;SET;STXBP4;MYCBP2;DCUN1D1;MTMR9;NOLC1;PIK3R1;MTMR4;PLA2G6;IQGAP2;GIGYF2;EPB41L5;LARP1;MAP2;PRKAR2A;MAP4;SCAI;PCK2;SRPK2;GSTM3;EGR2;GSTM1;EGR3;DTNA;HOMER1;TIPARP;EDEM1;INTS2;SMARCA5;PRRC2C;…
Insoluble Proteins Enriched In Brain Of 12 Wk R6/2 Mice Vs WT PMID29166617	HDSigDB 2021	DiestVMaleAccent1 (Diestrus vs Male, female high/KO upreg, male low/KO downreg)	91	637	6.03835e-16	3.02855	3.94203e-17	114.395	CYFIP2;ITSN2;PHF3;CYFIP1;NCKAP1;TOP2B;TRIO;AHCYL1;DDX3X;CTNND2;CLTC;PYGM;FMN2;ARHGAP5;AFF4;ACTB;SYNE1;NIPBL;DPYSL5;PPP2R1A;TRIM2;DPYSL3;OSBP;CEP170;ERC2;GLUL;NSF;WDR37;VPS13C;AP1B1;LARP4B;ANK3;IPCEF1;SPTB;CKAP5;EEF1G;STX1B;NCOR1;ARMCX2;LRRC7;TRAF3;GPD1;PKP4;ALDOC;JCAD;SHANK2;RAPGEF4;SHANK1;MYCBP2;AGAP2;AKAP5;PDS5B;NDRG2;MACROH2A1;ADD2;PURB;BCLAF1;LARP1;KIF3B;FAM120C;TRA2A;STXBP5;SRGAP3;FSD1;MAP4;…
Insoluble Proteins Enriched In Brain Of 12 Wk R6/2 Mice Vs WT PMID29166617	HDSigDB 2021	Union of DiestVMaleAccent3 and EstVMaleAccent3 (female low/KO downreg, male high/KO upreg)	91	637	6.03835e-16	3.02855	3.94203e-17	114.395	CYFIP2;ITSN2;PHF3;CYFIP1;NCKAP1;TOP2B;TRIO;AHCYL1;DDX3X;CTNND2;CLTC;PYGM;FMN2;ARHGAP5;AFF4;ACTB;SYNE1;NIPBL;DPYSL5;PPP2R1A;TRIM2;DPYSL3;OSBP;CEP170;ERC2;GLUL;NSF;WDR37;VPS13C;AP1B1;LARP4B;ANK3;IPCEF1;SPTB;CKAP5;EEF1G;STX1B;NCOR1;ARMCX2;LRRC7;TRAF3;GPD1;PKP4;ALDOC;JCAD;SHANK2;RAPGEF4;SHANK1;MYCBP2;AGAP2;AKAP5;PDS5B;NDRG2;MACROH2A1;ADD2;PURB;BCLAF1;LARP1;KIF3B;FAM120C;TRA2A;STXBP5;SRGAP3;FSD1;MAP4;…
Top Neuron-Enriched Genes In Humans And Mice PMID29892006	HDSigDB 2021	DiestVMaleAccent1 (Diestrus vs Male, female high/KO upreg, male low/KO downreg)	122	1000	7.17439e-16	2.55777	4.71469e-17	96.1549	CYFIP2;DGKG;RAB3C;GDA;FRMPD4;DGKB;ABAT;RIMS1;ATCAY;DPYSL5;DPYSL3;KIF5A;SLC16A7;PLXNC1;RGS8;PPFIA4;STK32B;FAM81A;PKNOX2;CALN1;NSF;MEF2C;LMO3;SOX11;ANK3;IPCEF1;HPCAL4;PYGO1;STX1B;SNHG14;DOK6;EEF1A2;UBE2V2;ATP6V1A;NECAB1;BHLHB9;PDE1A;LIN7A;TMTC1;NYAP2;PLCXD2;GOLGA7B;FUT9;SNTG1;MAP2;ZMAT4;SRGAP3;LRRC4C;RAB6B;LONRF2;RAB11FIP4;SCAI;HOMER2;IQSEC3;RAB27B;HSPA12A;TMEM196;DCLK1;FAM135B;PLCXD3;GNAL;DLG2;NBE…
Top Neuron-Enriched Genes In Humans And Mice PMID29892006	HDSigDB 2021	Union of DiestVMaleAccent3 and EstVMaleAccent3 (female low/KO downreg, male high/KO upreg)	122	1000	7.17439e-16	2.55777	4.71469e-17	96.1549	CYFIP2;DGKG;RAB3C;GDA;FRMPD4;DGKB;ABAT;RIMS1;ATCAY;DPYSL5;DPYSL3;KIF5A;SLC16A7;PLXNC1;RGS8;PPFIA4;STK32B;FAM81A;PKNOX2;CALN1;NSF;MEF2C;LMO3;SOX11;ANK3;IPCEF1;HPCAL4;PYGO1;STX1B;SNHG14;DOK6;EEF1A2;UBE2V2;ATP6V1A;NECAB1;BHLHB9;PDE1A;LIN7A;TMTC1;NYAP2;PLCXD2;GOLGA7B;FUT9;SNTG1;MAP2;ZMAT4;SRGAP3;LRRC4C;RAB6B;LONRF2;RAB11FIP4;SCAI;HOMER2;IQSEC3;RAB27B;HSPA12A;TMEM196;DCLK1;FAM135B;PLCXD3;GNAL;DLG2;NBE…
Genes Up-Regulated In dSPNs Of R6/2 Vs WT PMID32681824	HDSigDB 2021	DiestVMaleAccent1 (Diestrus vs Male, female high/KO upreg, male low/KO downreg)	60	321	7.293e-16	4.11585	4.82417e-17	154.634	RAB3C;NEXMIF;USP34;UBE3A;FMN2;BICD1;NIPBL;EP300;TNR;ARIH1;ERC2;KDM6A;RALGAPA1;SGIP1;MAGI2;ANK2;DNAJC1;NCOR1;SETBP1;RUFY3;DOK6;EXOC4;FAM193A;PAFAH1B1;CUL5;ROCK1;PDE1A;ANKRD12;PRICKLE2;LIN7A;NYAP2;GIGYF2;STRN3;FGD4;BTAF1;MAP2;TRA2A;KLHDC10;CLASP2;HSPA8;CREBBP;EXOC6B;PRRC2C;ARHGAP26;CDC42BPA;PBX1;MAPK10;CCDC88A;AGBL4;FAM135B;PAN3;FMNL2;APC;DMXL1;GNAQ;NF1;TRIP12;TCF4;CDK14;PAM
Genes Up-Regulated In dSPNs Of R6/2 Vs WT PMID32681824	HDSigDB 2021	Union of DiestVMaleAccent3 and EstVMaleAccent3 (female low/KO downreg, male high/KO upreg)	60	321	7.293e-16	4.11585	4.82417e-17	154.634	RAB3C;NEXMIF;USP34;UBE3A;FMN2;BICD1;NIPBL;EP300;TNR;ARIH1;ERC2;KDM6A;RALGAPA1;SGIP1;MAGI2;ANK2;DNAJC1;NCOR1;SETBP1;RUFY3;DOK6;EXOC4;FAM193A;PAFAH1B1;CUL5;ROCK1;PDE1A;ANKRD12;PRICKLE2;LIN7A;NYAP2;GIGYF2;STRN3;FGD4;BTAF1;MAP2;TRA2A;KLHDC10;CLASP2;HSPA8;CREBBP;EXOC6B;PRRC2C;ARHGAP26;CDC42BPA;PBX1;MAPK10;CCDC88A;AGBL4;FAM135B;PAN3;FMNL2;APC;DMXL1;GNAQ;NF1;TRIP12;TCF4;CDK14;PAM
Down-regulated Genes In Pons Of ATXN3 KO Mice GSE117605	HDSigDB 2021	DiestVMaleAccent1 (Diestrus vs Male, female high/KO upreg, male low/KO downreg)	144	1277	8.23573e-16	2.35945	5.48336e-17	88.343	DGKG;CHIC1;PRDM9;CTNND2;RORB;IKZF2;ZMIZ1;SCMH1;EP300;PLCE1;KMT5A;ARID2;USP8;S100A1;MAGI2;MRTFB;ANK2;ANK3;ATG12;DCTD;MARF1;SIK3;PKP4;CLOCK;XPR1;LRRC58;INO80D;SHC3;KMT2A;EPAS1;KMT2C;CEP85L;ANKRD12;GLIS3;LIN7A;RASAL2;PDS5A;GIGYF2;MED12L;CAMSAP2;EPB41L5;FUT9;SNTG1;MAP2;STXBP5;ARGLU1;ZKSCAN1;CREBBP;FZD3;CEP350;PRRC2C;HELZ;HOOK3;HSPA2;PHC3;CNOT4;ARHGAP32;FER;AGO3;NBEA;PDCL;NF1;CDK12;CPEB2;CPEB4;RBM27;R…
Down-regulated Genes In Pons Of ATXN3 KO Mice GSE117605	HDSigDB 2021	Union of DiestVMaleAccent3 and EstVMaleAccent3 (female low/KO downreg, male high/KO upreg)	144	1277	8.23573e-16	2.35945	5.48336e-17	88.343	DGKG;CHIC1;PRDM9;CTNND2;RORB;IKZF2;ZMIZ1;SCMH1;EP300;PLCE1;KMT5A;ARID2;USP8;S100A1;MAGI2;MRTFB;ANK2;ANK3;ATG12;DCTD;MARF1;SIK3;PKP4;CLOCK;XPR1;LRRC58;INO80D;SHC3;KMT2A;EPAS1;KMT2C;CEP85L;ANKRD12;GLIS3;LIN7A;RASAL2;PDS5A;GIGYF2;MED12L;CAMSAP2;EPB41L5;FUT9;SNTG1;MAP2;STXBP5;ARGLU1;ZKSCAN1;CREBBP;FZD3;CEP350;PRRC2C;HELZ;HOOK3;HSPA2;PHC3;CNOT4;ARHGAP32;FER;AGO3;NBEA;PDCL;NF1;CDK12;CPEB2;CPEB4;RBM27;R…
Genes Changed In Chat-expressing Interneurons Of zQ175DN Vs WT PMID32681824	HDSigDB 2021	DiestVMaleAccent1 (Diestrus vs Male, female high/KO upreg, male low/KO downreg)	143	1271	1.29597e-15	2.35165	8.68461e-17	86.9698	ANKRD13C;RAB3C;NCKAP1;CHIC1;TRRAP;CTNND2;WIPF2;CCNC;PRDM2;FGF1;SESN3;ZMIZ1;OSBP;PPFIA1;EP300;KMT5A;TBC1D22A;PRKCI;AP1B1;RFX3;TANC1;XRN2;SMS;SIK3;ATF6;CLOCK;CUL5;SLC1A2;CLEC16A;TMTC1;ARHGAP12;MAP2;ZMAT4;RPRD1B;SRGAP3;MAP4;ARGLU1;SCAI;KLHDC10;HSPA8;CREBBP;TCAF1;HOMER1;CEP350;GFPT1;EXOC6B;PBX1;POU6F1;CNOT4;ARHGAP32;DIAPH1;NBEA;ECHDC1;MDM4;CDK12;PICALM;CPEB4;RERE;GSK3B;SMG1;KDM5C;HIP1;USP32;RASGRF1;S…
Genes Changed In Chat-expressing Interneurons Of zQ175DN Vs WT PMID32681824	HDSigDB 2021	Union of DiestVMaleAccent3 and EstVMaleAccent3 (female low/KO downreg, male high/KO upreg)	143	1271	1.29597e-15	2.35165	8.68461e-17	86.9698	ANKRD13C;RAB3C;NCKAP1;CHIC1;TRRAP;CTNND2;WIPF2;CCNC;PRDM2;FGF1;SESN3;ZMIZ1;OSBP;PPFIA1;EP300;KMT5A;TBC1D22A;PRKCI;AP1B1;RFX3;TANC1;XRN2;SMS;SIK3;ATF6;CLOCK;CUL5;SLC1A2;CLEC16A;TMTC1;ARHGAP12;MAP2;ZMAT4;RPRD1B;SRGAP3;MAP4;ARGLU1;SCAI;KLHDC10;HSPA8;CREBBP;TCAF1;HOMER1;CEP350;GFPT1;EXOC6B;PBX1;POU6F1;CNOT4;ARHGAP32;DIAPH1;NBEA;ECHDC1;MDM4;CDK12;PICALM;CPEB4;RERE;GSK3B;SMG1;KDM5C;HIP1;USP32;RASGRF1;S…
Genes Up-Regulated In R6/1 Poor Vs WT GSE135057	HDSigDB 2021	DiestVMaleAccent1 (Diestrus vs Male, female high/KO upreg, male low/KO downreg)	231	2477	1.37596e-15	1.96868	9.28015e-17	72.676	MTRR;PLEKHB2;NEXMIF;ARAF;MSANTD4;IKZF2;ALKBH8;UBE2L3;PEG13;DPYSL5;PPP2R1A;DPYSL3;LUC7L;AGFG1;AP1B1;MTURN;UHMK1;AR;XRN1;WDR82;RUFY3;RELCH;TMEM126B;RIN2;MTMR1;STXBP4;MAGED1;PDE1A;MYCBP2;MTMR9;GIGYF2;MED12L;TTBK2;LARP1;PRKAR2A;RAD21;DHX36;DPH3;RIMKLB;SCAI;PCK2;SRPK2;CREBBP;INTS2;EXOC6B;PRRC2C;TMEM196;ACADSB;EHD3;ANP32E;FXYD6;MAGED2;PCDHB3;CDK14;PAM;PHF3;LRSAM1;CSRNP3;PHF20;CITED2;TGFB1I1;SNX12;RSF1;…
Genes Up-Regulated In R6/1 Poor Vs WT GSE135057	HDSigDB 2021	Union of DiestVMaleAccent3 and EstVMaleAccent3 (female low/KO downreg, male high/KO upreg)	231	2477	1.37596e-15	1.96868	9.28015e-17	72.676	MTRR;PLEKHB2;NEXMIF;ARAF;MSANTD4;IKZF2;ALKBH8;UBE2L3;PEG13;DPYSL5;PPP2R1A;DPYSL3;LUC7L;AGFG1;AP1B1;MTURN;UHMK1;AR;XRN1;WDR82;RUFY3;RELCH;TMEM126B;RIN2;MTMR1;STXBP4;MAGED1;PDE1A;MYCBP2;MTMR9;GIGYF2;MED12L;TTBK2;LARP1;PRKAR2A;RAD21;DHX36;DPH3;RIMKLB;SCAI;PCK2;SRPK2;CREBBP;INTS2;EXOC6B;PRRC2C;TMEM196;ACADSB;EHD3;ANP32E;FXYD6;MAGED2;PCDHB3;CDK14;PAM;PHF3;LRSAM1;CSRNP3;PHF20;CITED2;TGFB1I1;SNX12;RSF1;…
Genes Up-Regulated In Endothelial Cells Of R6/2 Vs WT PMID32681824	HDSigDB 2021	DiestVMaleAccent1 (Diestrus vs Male, female high/KO upreg, male low/KO downreg)	55	280	1.52186e-15	4.36401	1.03299e-16	160.634	PHF3;ANKRD13C;KDM5C;HIP1;USP34;RSF1;UBE3A;PITPNC1;SYNE1;ARID2;PDE8B;ERC2;SOX5;LIN52;NCOA1;CNOT6L;ARHGEF12;RALGAPA1;TSC22D3;MAGI2;VPS13A;ANK2;PTBP3;MARF1;NCOR1;PIK3CA;SELENOP;FAM193A;RAPGEF5;XPR1;INO80D;DDX24;NUFIP2;EPAS1;RASAL2;SNTG1;RICTOR;LRRC4C;ARFGEF1;ATF7IP;HSPA8;UBE2H;KLHL2;BBIP1;SORBS1;ARHGAP26;MIB1;CNOT4;DIAPH2;DLG2;STK24;VAPA;NFIB;TRIP12;TCF4
Genes Up-Regulated In Endothelial Cells Of R6/2 Vs WT PMID32681824	HDSigDB 2021	Union of DiestVMaleAccent3 and EstVMaleAccent3 (female low/KO downreg, male high/KO upreg)	55	280	1.52186e-15	4.36401	1.03299e-16	160.634	PHF3;ANKRD13C;KDM5C;HIP1;USP34;RSF1;UBE3A;PITPNC1;SYNE1;ARID2;PDE8B;ERC2;SOX5;LIN52;NCOA1;CNOT6L;ARHGEF12;RALGAPA1;TSC22D3;MAGI2;VPS13A;ANK2;PTBP3;MARF1;NCOR1;PIK3CA;SELENOP;FAM193A;RAPGEF5;XPR1;INO80D;DDX24;NUFIP2;EPAS1;RASAL2;SNTG1;RICTOR;LRRC4C;ARFGEF1;ATF7IP;HSPA8;UBE2H;KLHL2;BBIP1;SORBS1;ARHGAP26;MIB1;CNOT4;DIAPH2;DLG2;STK24;VAPA;NFIB;TRIP12;TCF4
HD Grade 2 Markers In Human Caudate Nucleus (HG-U133B) GSE3790	HDSigDB 2021	DiestVMaleAccent1 (Diestrus vs Male, female high/KO upreg, male low/KO downreg)	116	942	2.21074e-15	2.57675	1.51014e-16	93.8688	FRMPD4;NEXMIF;IKZF2;ACTB;RIMS1;PTAR1;ATCAY;PPP4R4;KIF5A;RGS8;CALN1;LMO3;TMOD2;DIO2;MTURN;STX1B;LIX1;RUFY3;DOK6;ANKRD40;RELCH;JCAD;NECAB1;INO80D;ARHGEF26;KMT2C;AGAP2;GLIS3;NEDD4L;TMTC1;PLCXD2;MAP2;PRKAR2A;MAP4;LRRC4C;RAB6B;ARGLU1;LONRF2;SCAI;DTNA;HOMER1;NEBL;IRF2BP2;RAB27B;BTBD7;KLHL24;FOXN2;ARHGAP26;TMEM196;SMAD5;DCLK1;AFDN;ARHGAP32;PEX5L;DLG2;NBEA;MDM4;TCF4;GSK3B;CSRNP3;NRSN1;HIP1;USP34;CELF5;AR…
HD Grade 2 Markers In Human Caudate Nucleus (HG-U133B) GSE3790	HDSigDB 2021	Union of DiestVMaleAccent3 and EstVMaleAccent3 (female low/KO downreg, male high/KO upreg)	116	942	2.21074e-15	2.57675	1.51014e-16	93.8688	FRMPD4;NEXMIF;IKZF2;ACTB;RIMS1;PTAR1;ATCAY;PPP4R4;KIF5A;RGS8;CALN1;LMO3;TMOD2;DIO2;MTURN;STX1B;LIX1;RUFY3;DOK6;ANKRD40;RELCH;JCAD;NECAB1;INO80D;ARHGEF26;KMT2C;AGAP2;GLIS3;NEDD4L;TMTC1;PLCXD2;MAP2;PRKAR2A;MAP4;LRRC4C;RAB6B;ARGLU1;LONRF2;SCAI;DTNA;HOMER1;NEBL;IRF2BP2;RAB27B;BTBD7;KLHL24;FOXN2;ARHGAP26;TMEM196;SMAD5;DCLK1;AFDN;ARHGAP32;PEX5L;DLG2;NBEA;MDM4;TCF4;GSK3B;CSRNP3;NRSN1;HIP1;USP34;CELF5;AR…
Genes Up-Regulated In Expression In Striatum From 10 Wk HdhQ111 HD Mice GSE19780	HDSigDB 2021	DiestVMaleAccent1 (Diestrus vs Male, female high/KO upreg, male low/KO downreg)	50	239	2.58237e-15	4.70955	1.77517e-16	170.803	GDA;PTEN;KANTR;PITPNC1;RGS5;TRIM2;KIF5A;PHACTR1;CALN1;NSF;CAMK1D;RALGAPA1;STRBP;MRTFB;KCNAB2;PHF20L1;MARF1;GPD1;MAPRE2;SET;SDC4;NUFIP2;ROCK1;MYCBP2;CAMK2A;NEDD4L;RASAL2;FAM168A;MAP2;LRRC4C;TCAF1;CBX5;CPSF6;PRRC2C;RAB27B;AP2B1;SORBS1;PUM1;DCLK1;PBX1;GATAD2B;MED13L;MARCKS;DLG2;ABI2;APC;NFIB;TAOK1;TACC1;TCF4
Genes Up-Regulated In Expression In Striatum From 10 Wk HdhQ111 HD Mice GSE19780	HDSigDB 2021	Union of DiestVMaleAccent3 and EstVMaleAccent3 (female low/KO downreg, male high/KO upreg)	50	239	2.58237e-15	4.70955	1.77517e-16	170.803	GDA;PTEN;KANTR;PITPNC1;RGS5;TRIM2;KIF5A;PHACTR1;CALN1;NSF;CAMK1D;RALGAPA1;STRBP;MRTFB;KCNAB2;PHF20L1;MARF1;GPD1;MAPRE2;SET;SDC4;NUFIP2;ROCK1;MYCBP2;CAMK2A;NEDD4L;RASAL2;FAM168A;MAP2;LRRC4C;TCAF1;CBX5;CPSF6;PRRC2C;RAB27B;AP2B1;SORBS1;PUM1;DCLK1;PBX1;GATAD2B;MED13L;MARCKS;DLG2;ABI2;APC;NFIB;TAOK1;TACC1;TCF4
Genes Changed In Pvalb/Th-expressing Interneurons Of zQ175DN Vs WT PMID32681824	HDSigDB 2021	DiestVMaleAccent1 (Diestrus vs Male, female high/KO upreg, male low/KO downreg)	63	360	3.22201e-15	3.80142	2.2288e-16	137.003	DGKG;RERE;NCKAP1;HIP1;ARHGAP5;AFF4;SYNE1;DOCK10;RIMS1;SPRED1;REV3L;PHACTR1;ARIH1;PLXNC1;ERC2;SPTAN1;MEF2C;PEG3;MAGI2;ANK3;KSR2;BCR;CNKSR2;CREB1;SETBP1;LRRC7;SIK3;MGLL;SHANK2;SHC3;DDX24;ROCK2;CAMK2A;RASAL2;PPM1E;STRN3;BTAF1;DHX36;SPOP;SRGAP3;LRRC4C;ARGLU1;FNIP2;SRPK2;TCAF1;HOMER1;GAD1;IQSEC3;AP2B1;NMNAT2;TMEM196;HS3ST4;PBX1;MIB1;MAPK10;FAM135B;GNAL;PDE10A;AGO3;DMXL1;AGO2;SPIRE1;PAM
Genes Changed In Pvalb/Th-expressing Interneurons Of zQ175DN Vs WT PMID32681824	HDSigDB 2021	Union of DiestVMaleAccent3 and EstVMaleAccent3 (female low/KO downreg, male high/KO upreg)	63	360	3.22201e-15	3.80142	2.2288e-16	137.003	DGKG;RERE;NCKAP1;HIP1;ARHGAP5;AFF4;SYNE1;DOCK10;RIMS1;SPRED1;REV3L;PHACTR1;ARIH1;PLXNC1;ERC2;SPTAN1;MEF2C;PEG3;MAGI2;ANK3;KSR2;BCR;CNKSR2;CREB1;SETBP1;LRRC7;SIK3;MGLL;SHANK2;SHC3;DDX24;ROCK2;CAMK2A;RASAL2;PPM1E;STRN3;BTAF1;DHX36;SPOP;SRGAP3;LRRC4C;ARGLU1;FNIP2;SRPK2;TCAF1;HOMER1;GAD1;IQSEC3;AP2B1;NMNAT2;TMEM196;HS3ST4;PBX1;MIB1;MAPK10;FAM135B;GNAL;PDE10A;AGO3;DMXL1;AGO2;SPIRE1;PAM
Cortex RNA M14 Module (Cyan) PMID26900923	HDSigDB 2021	DiestVMaleAccent1 (Diestrus vs Male, female high/KO upreg, male low/KO downreg)	108	852	3.50515e-15	2.65398	2.43981e-16	95.4091	RIPOR1;TRIO;DGKD;MTRR;WIPF2;PRDM2;ARHGAP35;ALKBH5;RIMS4;ATCAY;CHORDC1;EP300;KMT5A;SLC25A44;PRKAB2;MRTFB;DIO2;SOX11;BCR;ILF3;PPP1R3C;JCAD;MEAF6;CLEC16A;NEDD4L;NOLC1;MTMR4;STK4;DNAJC28;LARP1;PRKAR2A;UBR5;EIF4EBP2;MCMBP;ABL2;SOCS7;SKIL;MCL1;EGR2;ANKRD26;EGR3;HOMER1;TIPARP;CEP350;NUP153;HOOK3;CORO2A;FOSL2;MFHAS1;BCL2;RERE;PHF3;KDM5B;SMG1;AHCTF1;KDM5C;USP31;SETD7;OSBPL11;TENT4A;SMG7;CHD1;SH3RF1;DUSP11…
Cortex RNA M14 Module (Cyan) PMID26900923	HDSigDB 2021	Union of DiestVMaleAccent3 and EstVMaleAccent3 (female low/KO downreg, male high/KO upreg)	108	852	3.50515e-15	2.65398	2.43981e-16	95.4091	RIPOR1;TRIO;DGKD;MTRR;WIPF2;PRDM2;ARHGAP35;ALKBH5;RIMS4;ATCAY;CHORDC1;EP300;KMT5A;SLC25A44;PRKAB2;MRTFB;DIO2;SOX11;BCR;ILF3;PPP1R3C;JCAD;MEAF6;CLEC16A;NEDD4L;NOLC1;MTMR4;STK4;DNAJC28;LARP1;PRKAR2A;UBR5;EIF4EBP2;MCMBP;ABL2;SOCS7;SKIL;MCL1;EGR2;ANKRD26;EGR3;HOMER1;TIPARP;CEP350;NUP153;HOOK3;CORO2A;FOSL2;MFHAS1;BCL2;RERE;PHF3;KDM5B;SMG1;AHCTF1;KDM5C;USP31;SETD7;OSBPL11;TENT4A;SMG7;CHD1;SH3RF1;DUSP11…
Genes Down-Regulated In Foxp2/Olfm3-expressing Neurons Of R6/2 Vs WT PMID32681824	HDSigDB 2021	DiestVMaleAccent1 (Diestrus vs Male, female high/KO upreg, male low/KO downreg)	86	600	3.53993e-15	3.03063	2.47933e-16	108.901	DGKG;TRIO;FRMPD4;DGKB;LRRK2;CELF5;ABAT;PPP1R9A;PITPNC1;SYNE1;DOCK10;RPS6KA3;SPRED1;SIPA1L1;SESN3;PPP4R4;PSD3;PHACTR1;ERC2;PDE8B;RGS8;CALN1;PPP1R16B;NSF;UNC13C;LYNX1;CAMK1D;KSR2;ANK3;SPTB;BCR;CNKSR2;ARHGEF9;MRAS;GFOD1;LRRC7;LIX1;MGLL;JCAD;GAS7;RAPGEF4;GRAMD1B;NECAB1;SHC3;STAU2;CAMK2A;NEDD4L;RASAL2;ADD2;ATXN1;ACVR1C;SV2C;GNG7;UBR5;ABL2;FNIP2;MAPK4;ARNT2;DTNA;HOMER1;SPAG5;NEBL;DENND4A;KCNIP3;GAD1;KL…
Genes Down-Regulated In Foxp2/Olfm3-expressing Neurons Of R6/2 Vs WT PMID32681824	HDSigDB 2021	Union of DiestVMaleAccent3 and EstVMaleAccent3 (female low/KO downreg, male high/KO upreg)	86	600	3.53993e-15	3.03063	2.47933e-16	108.901	DGKG;TRIO;FRMPD4;DGKB;LRRK2;CELF5;ABAT;PPP1R9A;PITPNC1;SYNE1;DOCK10;RPS6KA3;SPRED1;SIPA1L1;SESN3;PPP4R4;PSD3;PHACTR1;ERC2;PDE8B;RGS8;CALN1;PPP1R16B;NSF;UNC13C;LYNX1;CAMK1D;KSR2;ANK3;SPTB;BCR;CNKSR2;ARHGEF9;MRAS;GFOD1;LRRC7;LIX1;MGLL;JCAD;GAS7;RAPGEF4;GRAMD1B;NECAB1;SHC3;STAU2;CAMK2A;NEDD4L;RASAL2;ADD2;ATXN1;ACVR1C;SV2C;GNG7;UBR5;ABL2;FNIP2;MAPK4;ARNT2;DTNA;HOMER1;SPAG5;NEBL;DENND4A;KCNIP3;GAD1;KL…
Genes Changed In dSPNs Of zQ175DN Vs WT PMID32681824	HDSigDB 2021	DiestVMaleAccent1 (Diestrus vs Male, female high/KO upreg, male low/KO downreg)	89	634	3.80054e-15	2.96172	2.67829e-16	106.196	CYFIP2;DGKG;NCKAP1;RAB3C;GSK3B;THRB;DGKB;LRRK2;CELF5;ABAT;UBE3A;LDB2;PPP1R9A;BICD1;PITPNC1;SPRED1;SIPA1L1;PPP4R4;PSD3;KIF5A;TNR;PHACTR1;ERC2;PDE8B;PCMTD1;PPP1R16B;VAV3;UNC13C;CAMK1D;LMO3;MAGI2;ANK2;BCR;CNKSR2;DNAJC1;ZEB1;MMP16;SETBP1;LRRC7;DOK6;SIK3;ATF6;MGLL;JCAD;XPR1;KDM7A;RAPGEF4;SHC3;ROCK2;CAMK2A;PRICKLE2;NEDD4L;RASAL2;IQGAP2;BTAF1;ATXN1;ZMAT4;GNG7;SRGAP3;ARGLU1;MAPK4;RANBP2;TCAF1;HOMER1;NEBL…
Genes Changed In dSPNs Of zQ175DN Vs WT PMID32681824	HDSigDB 2021	Union of DiestVMaleAccent3 and EstVMaleAccent3 (female low/KO downreg, male high/KO upreg)	89	634	3.80054e-15	2.96172	2.67829e-16	106.196	CYFIP2;DGKG;NCKAP1;RAB3C;GSK3B;THRB;DGKB;LRRK2;CELF5;ABAT;UBE3A;LDB2;PPP1R9A;BICD1;PITPNC1;SPRED1;SIPA1L1;PPP4R4;PSD3;KIF5A;TNR;PHACTR1;ERC2;PDE8B;PCMTD1;PPP1R16B;VAV3;UNC13C;CAMK1D;LMO3;MAGI2;ANK2;BCR;CNKSR2;DNAJC1;ZEB1;MMP16;SETBP1;LRRC7;DOK6;SIK3;ATF6;MGLL;JCAD;XPR1;KDM7A;RAPGEF4;SHC3;ROCK2;CAMK2A;PRICKLE2;NEDD4L;RASAL2;IQGAP2;BTAF1;ATXN1;ZMAT4;GNG7;SRGAP3;ARGLU1;MAPK4;RANBP2;TCAF1;HOMER1;NEBL…
Genes Up-Regulated In Influence Of Cugbp1 KO On Expression In C2C12 Mouse Cells GSE29990	HDSigDB 2021	DiestVMaleAccent1 (Diestrus vs Male, female high/KO upreg, male low/KO downreg)	221	2356	3.89674e-15	1.97192	2.76293e-16	70.6442	CYFIP2;CCNC;DCAF6;RPS6KA3;SCP2;ZMIZ1;PPP2R1A;LUC7L;GLUL;MED1;SAP30BP;PRKCI;PHKA1;ANK2;ANK3;RC3H2;THAP2;MOSMO;AR;MARF1;XRN1;WDR82;XRN2;SUCLG2;RIN2;TMEM87A;ANAPC15;STXBP4;MYCBP2;NEDD4L;PIK3R1;MTMR4;IQGAP2;GIGYF2;TTBK2;EPB41L5;DPH3;GSTM1;DTNA;HOMER1;EXOC6B;PRRC2C;PUM1;ACADSB;PBX1;DCLK1;FOSL2;POU6F1;CCDC88A;RGL1;CDK14;SFXN5;GSTM5;TOP2B;LRSAM1;SMG1;SETD2;PHF20;CLTC;SETD7;SNX12;PYGM;RSF1;CROT;PRL;SMG7;…
Genes Up-Regulated In Influence Of Cugbp1 KO On Expression In C2C12 Mouse Cells GSE29990	HDSigDB 2021	Union of DiestVMaleAccent3 and EstVMaleAccent3 (female low/KO downreg, male high/KO upreg)	221	2356	3.89674e-15	1.97192	2.76293e-16	70.6442	CYFIP2;CCNC;DCAF6;RPS6KA3;SCP2;ZMIZ1;PPP2R1A;LUC7L;GLUL;MED1;SAP30BP;PRKCI;PHKA1;ANK2;ANK3;RC3H2;THAP2;MOSMO;AR;MARF1;XRN1;WDR82;XRN2;SUCLG2;RIN2;TMEM87A;ANAPC15;STXBP4;MYCBP2;NEDD4L;PIK3R1;MTMR4;IQGAP2;GIGYF2;TTBK2;EPB41L5;DPH3;GSTM1;DTNA;HOMER1;EXOC6B;PRRC2C;PUM1;ACADSB;PBX1;DCLK1;FOSL2;POU6F1;CCDC88A;RGL1;CDK14;SFXN5;GSTM5;TOP2B;LRSAM1;SMG1;SETD2;PHF20;CLTC;SETD7;SNX12;PYGM;RSF1;CROT;PRL;SMG7;…
Genes Up-Regulated In Genes Changed In HDACi 106 Vs Vehicle Treated Friedreich Ataxia Patient Blood Cells GSE30933	HDSigDB 2021	DiestVMaleAccent1 (Diestrus vs Male, female high/KO upreg, male low/KO downreg)	224	2400	4.03788e-15	1.96293	2.88046e-16	70.2402	CYFIP2;NCKAP1;AHCYL1;SPARC;MTRR;TRRAP;IPP;CCNC;RPS6KA3;ALKBH5;RNF114;PPP4R4;PAQR8;MED1;PRKCI;MRTFB;ANK3;HPCAL4;MTURN;MARF1;WDR82;SUCLG2;HECA;SET;CEP85L;MYCBP2;DCUN1D1;NEDD4L;PIK3R1;MTMR4;EPB41L5;MCMBP;STXBP5;MAP4;ARGLU1;SRPK2;GSTM3;EGR2;FZD3;TIPARP;INTS2;PUM2;AGO2;KYAT3;CDK14;PHF3;SMG1;AHCTF1;BTG1;PHF20;CITED2;RSF1;IER3IP1;LYST;NIPBL;PIP4P2;ZMYM1;XPO1;NKRF;REV3L;ARIH1;SPTAN1;PCMTD1;UPF2;ZYG11B;ZH…
Genes Up-Regulated In Genes Changed In HDACi 106 Vs Vehicle Treated Friedreich Ataxia Patient Blood Cells GSE30933	HDSigDB 2021	Union of DiestVMaleAccent3 and EstVMaleAccent3 (female low/KO downreg, male high/KO upreg)	224	2400	4.03788e-15	1.96293	2.88046e-16	70.2402	CYFIP2;NCKAP1;AHCYL1;SPARC;MTRR;TRRAP;IPP;CCNC;RPS6KA3;ALKBH5;RNF114;PPP4R4;PAQR8;MED1;PRKCI;MRTFB;ANK3;HPCAL4;MTURN;MARF1;WDR82;SUCLG2;HECA;SET;CEP85L;MYCBP2;DCUN1D1;NEDD4L;PIK3R1;MTMR4;EPB41L5;MCMBP;STXBP5;MAP4;ARGLU1;SRPK2;GSTM3;EGR2;FZD3;TIPARP;INTS2;PUM2;AGO2;KYAT3;CDK14;PHF3;SMG1;AHCTF1;BTG1;PHF20;CITED2;RSF1;IER3IP1;LYST;NIPBL;PIP4P2;ZMYM1;XPO1;NKRF;REV3L;ARIH1;SPTAN1;PCMTD1;UPF2;ZYG11B;ZH…
Genes Down-Regulated In Genes Changed In STHdhQ7/Q7 Cells Upon Heat Shock GSE38001	HDSigDB 2021	DiestVMaleAccent1 (Diestrus vs Male, female high/KO upreg, male low/KO downreg)	378	4765	5.11396e-15	1.72947	3.6702e-16	61.4673	ITSN2;CYFIP2;CYFIP1;IPO11;TRIO;SPARC;ZFYVE9;TRRAP;ARAF;IPP;ACTB;UBE2L3;RPS6KA3;DPYSL5;ZMIZ1;PPP2R1A;DPYSL3;PLCE1;SOX6;TBC1D22A;GLUL;PKNOX2;PAQR8;MED1;OXSM;MRTFB;AP1B1;PHKA1;ANK3;ASRGL1;BCR;AR;STX1B;SNHG14;RUFY3;XRN2;SIK3;SUCLG2;ATF7;ZFPM2;ATF6;ALDH7A1;LXN;MEAF6;STXBP4;PDE1A;MYCBP2;DCUN1D1;MTMR9;NOLC1;NEDD4L;BAZ2A;PIK3R1;MTMR4;IQGAP2;SMIM7;GIGYF2;MED12L;TTBK2;EPB41L5;LARP1;DHX36;MCMBP;STXBP5;MAP4;…
Genes Down-Regulated In Genes Changed In STHdhQ7/Q7 Cells Upon Heat Shock GSE38001	HDSigDB 2021	Union of DiestVMaleAccent3 and EstVMaleAccent3 (female low/KO downreg, male high/KO upreg)	378	4765	5.11396e-15	1.72947	3.6702e-16	61.4673	ITSN2;CYFIP2;CYFIP1;IPO11;TRIO;SPARC;ZFYVE9;TRRAP;ARAF;IPP;ACTB;UBE2L3;RPS6KA3;DPYSL5;ZMIZ1;PPP2R1A;DPYSL3;PLCE1;SOX6;TBC1D22A;GLUL;PKNOX2;PAQR8;MED1;OXSM;MRTFB;AP1B1;PHKA1;ANK3;ASRGL1;BCR;AR;STX1B;SNHG14;RUFY3;XRN2;SIK3;SUCLG2;ATF7;ZFPM2;ATF6;ALDH7A1;LXN;MEAF6;STXBP4;PDE1A;MYCBP2;DCUN1D1;MTMR9;NOLC1;NEDD4L;BAZ2A;PIK3R1;MTMR4;IQGAP2;SMIM7;GIGYF2;MED12L;TTBK2;EPB41L5;LARP1;DHX36;MCMBP;STXBP5;MAP4;…
Up-regulated Genes In Cerebellum Of HD Q175 Mice PMID26900923	HDSigDB 2021	DiestVMaleAccent1 (Diestrus vs Male, female high/KO upreg, male low/KO downreg)	133	1169	6.82879e-15	2.36903	4.93043e-16	83.4988	CCDC71L;RAB3C;DGKD;NEXMIF;FMR1;CCNC;DCAF6;SLK;PEG13;GNPTAB;DPYSL5;PPP2R1A;DPYSL3;PLCE1;PLXNC1;ARID2;MAP3K5;UNC13C;MEF2C;PRKCI;ANK3;IPCEF1;HPCAL4;FBXO11;MYT1;RALGAPB;GPD1;SMS;RELCH;HECA;ZFPM2;ANAPC1;MTMR1;NECAB1;BHLHB9;NEDD4L;PDS5B;NYAP2;IQGAP2;MACROH2A1;PLCXD2;ARHGAP12;RAD21;DHX36;LRRC4C;RAB6B;SRPK2;CREBBP;TCAF1;PHC1;TRAPPC8;HSPA2;GNG12;ST18;MED13L;PUM2;ARHGAP33;AFDN;NBEA;UBA3;BCL2;NF1;FXYD6;TCF4…
Up-regulated Genes In Cerebellum Of HD Q175 Mice PMID26900923	HDSigDB 2021	Union of DiestVMaleAccent3 and EstVMaleAccent3 (female low/KO downreg, male high/KO upreg)	133	1169	6.82879e-15	2.36903	4.93043e-16	83.4988	CCDC71L;RAB3C;DGKD;NEXMIF;FMR1;CCNC;DCAF6;SLK;PEG13;GNPTAB;DPYSL5;PPP2R1A;DPYSL3;PLCE1;PLXNC1;ARID2;MAP3K5;UNC13C;MEF2C;PRKCI;ANK3;IPCEF1;HPCAL4;FBXO11;MYT1;RALGAPB;GPD1;SMS;RELCH;HECA;ZFPM2;ANAPC1;MTMR1;NECAB1;BHLHB9;NEDD4L;PDS5B;NYAP2;IQGAP2;MACROH2A1;PLCXD2;ARHGAP12;RAD21;DHX36;LRRC4C;RAB6B;SRPK2;CREBBP;TCAF1;PHC1;TRAPPC8;HSPA2;GNG12;ST18;MED13L;PUM2;ARHGAP33;AFDN;NBEA;UBA3;BCL2;NF1;FXYD6;TCF4…
Genes Up-Regulated In Sst/Npy-expressing Interneurons Of R6/2 Vs WT PMID32681824	HDSigDB 2021	DiestVMaleAccent1 (Diestrus vs Male, female high/KO upreg, male low/KO downreg)	59	328	7.67332e-15	3.92143	5.57336e-16	137.734	CSRNP3;THRB;UBE3C;CTNND2;CLTC;USP34;SH3RF1;RPS6KA3;TRIM2;CHORDC1;ERC2;KDM6A;MAGI2;RFX3;ANK2;ANK3;DNAJC1;NCOR1;RALGAPB;MMP16;SETBP1;RUFY3;DOK6;SIK3;EXOC4;FAM193A;SREK1;XPR1;PAFAH1B1;GRAMD1B;ROCK1;MYCBP2;ANKRD12;AKAP6;GIGYF2;STRN3;BCLAF1;SNTG1;TRA2A;SRGAP3;PAK3;LRRC4C;HSPA8;CREBBP;NEBL;PRRC2C;RAB27B;SORBS2;SORBS1;CDC42BPA;MYO9A;PBX1;MKLN1;ARHGAP32;DLG2;APC;PPP2R2B;TRIP12;CDK14
Genes Up-Regulated In Sst/Npy-expressing Interneurons Of R6/2 Vs WT PMID32681824	HDSigDB 2021	Union of DiestVMaleAccent3 and EstVMaleAccent3 (female low/KO downreg, male high/KO upreg)	59	328	7.67332e-15	3.92143	5.57336e-16	137.734	CSRNP3;THRB;UBE3C;CTNND2;CLTC;USP34;SH3RF1;RPS6KA3;TRIM2;CHORDC1;ERC2;KDM6A;MAGI2;RFX3;ANK2;ANK3;DNAJC1;NCOR1;RALGAPB;MMP16;SETBP1;RUFY3;DOK6;SIK3;EXOC4;FAM193A;SREK1;XPR1;PAFAH1B1;GRAMD1B;ROCK1;MYCBP2;ANKRD12;AKAP6;GIGYF2;STRN3;BCLAF1;SNTG1;TRA2A;SRGAP3;PAK3;LRRC4C;HSPA8;CREBBP;NEBL;PRRC2C;RAB27B;SORBS2;SORBS1;CDC42BPA;MYO9A;PBX1;MKLN1;ARHGAP32;DLG2;APC;PPP2R2B;TRIP12;CDK14
Genes Changed In Endothelial Cells Of R6/2 Vs WT PMID32681824	HDSigDB 2021	DiestVMaleAccent1 (Diestrus vs Male, female high/KO upreg, male low/KO downreg)	72	463	1.43388e-14	3.31207	1.04767e-15	114.241	PHF3;ANKRD13C;KDM5C;SPARC;HIP1;USP34;RSF1;UBE3A;PPP1R9A;PITPNC1;SYNE1;PREX2;TATDN1;PHACTR1;ERC2;ARID2;PDE8B;GLUL;LIN52;SOX5;NCOA1;USP46;MEF2C;CNOT6L;ARHGEF12;RALGAPA1;DESI2;TSC22D3;MAGI2;VPS13A;ANK2;PTBP3;MARF1;NCOR1;PIK3CA;SELENOP;FAM193A;RAPGEF5;XPR1;INO80D;NUFIP2;DDX24;EPAS1;NEDD4L;AKAP6;RASAL2;ATXN1;CAMK2N1;SNTG1;RICTOR;LRRC4C;ARFGEF1;ATF7IP;HSPA8;UBE2H;KLHL2;BBIP1;SORBS1;ARHGAP26;MIB1;CNOT4;…
Genes Changed In Endothelial Cells Of R6/2 Vs WT PMID32681824	HDSigDB 2021	Union of DiestVMaleAccent3 and EstVMaleAccent3 (female low/KO downreg, male high/KO upreg)	72	463	1.43388e-14	3.31207	1.04767e-15	114.241	PHF3;ANKRD13C;KDM5C;SPARC;HIP1;USP34;RSF1;UBE3A;PPP1R9A;PITPNC1;SYNE1;PREX2;TATDN1;PHACTR1;ERC2;ARID2;PDE8B;GLUL;LIN52;SOX5;NCOA1;USP46;MEF2C;CNOT6L;ARHGEF12;RALGAPA1;DESI2;TSC22D3;MAGI2;VPS13A;ANK2;PTBP3;MARF1;NCOR1;PIK3CA;SELENOP;FAM193A;RAPGEF5;XPR1;INO80D;NUFIP2;DDX24;EPAS1;NEDD4L;AKAP6;RASAL2;ATXN1;CAMK2N1;SNTG1;RICTOR;LRRC4C;ARFGEF1;ATF7IP;HSPA8;UBE2H;KLHL2;BBIP1;SORBS1;ARHGAP26;MIB1;CNOT4;…
Genes Down-Regulated In Diacylglycerol Kinase Inhibitor II Treated STHdhQ111 Vs Control GSE129143	HDSigDB 2021	DiestVMaleAccent1 (Diestrus vs Male, female high/KO upreg, male low/KO downreg)	248	2782	1.61699e-14	1.87764	1.18845e-15	64.5272	CYFIP1;TRIO;PANK3;SPARC;PLEKHB2;TRRAP;WIPF2;IKZF2;ACTB;SYNGAP1;PEG13;SCP2;PPP2R1A;SOX5;MRTFB;AP1B1;FRS2;ANK3;MTURN;UHMK1;BCR;PPP1R3C;XRN1;SIK3;RELCH;KCTD12;ZFPM2;RIN2;MTMR1;LXN;SDC4;EPAS1;MAGED1;AGAP2;MTMR9;BAZ2A;MTMR4;IQGAP2;TTBK2;EPB41L5;RAD21;DECR2;EGR2;GSTM1;EGR3;NEBL;RAB27B;GNG12;PHC3;PBX1;DCLK1;FOSL2;POU6F1;CCDC88A;FAM135B;AGO1;AGO2;ANP32E;MAGED2;RGL1;CDK14;PAM;GSTM5;CPEB4;PYGB;LRSAM1;SETD2…
Genes Down-Regulated In Diacylglycerol Kinase Inhibitor II Treated STHdhQ111 Vs Control GSE129143	HDSigDB 2021	Union of DiestVMaleAccent3 and EstVMaleAccent3 (female low/KO downreg, male high/KO upreg)	248	2782	1.61699e-14	1.87764	1.18845e-15	64.5272	CYFIP1;TRIO;PANK3;SPARC;PLEKHB2;TRRAP;WIPF2;IKZF2;ACTB;SYNGAP1;PEG13;SCP2;PPP2R1A;SOX5;MRTFB;AP1B1;FRS2;ANK3;MTURN;UHMK1;BCR;PPP1R3C;XRN1;SIK3;RELCH;KCTD12;ZFPM2;RIN2;MTMR1;LXN;SDC4;EPAS1;MAGED1;AGAP2;MTMR9;BAZ2A;MTMR4;IQGAP2;TTBK2;EPB41L5;RAD21;DECR2;EGR2;GSTM1;EGR3;NEBL;RAB27B;GNG12;PHC3;PBX1;DCLK1;FOSL2;POU6F1;CCDC88A;FAM135B;AGO1;AGO2;ANP32E;MAGED2;RGL1;CDK14;PAM;GSTM5;CPEB4;PYGB;LRSAM1;SETD2…
Genes Down-Regulated In iSPNs Of zQ175DN Vs WT PMID32681824	HDSigDB 2021	DiestVMaleAccent1 (Diestrus vs Male, female high/KO upreg, male low/KO downreg)	69	436	2.31215e-14	3.37618	1.70937e-15	114.799	NCKAP1;RAB3C;GSK3B;THRB;DGKB;LRRK2;CELF5;PPP1R9A;PITPNC1;SYNE1;SPRED1;SIPA1L1;PPP4R4;SCMH1;PSD3;PHACTR1;ERC2;PDE8B;PCMTD1;PPP1R16B;UNC13C;CAMK1D;SGIP1;PJA2;BCR;CNKSR2;DNAJC1;ZEB1;MMP16;LRRC7;SIK3;ATF6;JCAD;KDM7A;SHC3;ROCK2;CAMK2A;NEDD4L;AKAP6;RASAL2;IQGAP2;BTAF1;ATXN1;ZMAT4;GNG7;ARGLU1;MAPK4;RANBP2;TCAF1;HOMER1;NEBL;KCNIP3;KLHL2;SORBS2;AP2B1;SORBS1;BAIAP2;DCLK1;PDP1;ARHGAP32;DIAPH2;DLG2;GNAL;PDE1…
Genes Down-Regulated In iSPNs Of zQ175DN Vs WT PMID32681824	HDSigDB 2021	Union of DiestVMaleAccent3 and EstVMaleAccent3 (female low/KO downreg, male high/KO upreg)	69	436	2.31215e-14	3.37618	1.70937e-15	114.799	NCKAP1;RAB3C;GSK3B;THRB;DGKB;LRRK2;CELF5;PPP1R9A;PITPNC1;SYNE1;SPRED1;SIPA1L1;PPP4R4;SCMH1;PSD3;PHACTR1;ERC2;PDE8B;PCMTD1;PPP1R16B;UNC13C;CAMK1D;SGIP1;PJA2;BCR;CNKSR2;DNAJC1;ZEB1;MMP16;LRRC7;SIK3;ATF6;JCAD;KDM7A;SHC3;ROCK2;CAMK2A;NEDD4L;AKAP6;RASAL2;IQGAP2;BTAF1;ATXN1;ZMAT4;GNG7;ARGLU1;MAPK4;RANBP2;TCAF1;HOMER1;NEBL;KCNIP3;KLHL2;SORBS2;AP2B1;SORBS1;BAIAP2;DCLK1;PDP1;ARHGAP32;DIAPH2;DLG2;GNAL;PDE1…
Genes Down-Regulated In Expression In Forebrain Of 11 Wk SCA1 Spinocerebellar Ataxia 1 Mice GSE2867	HDSigDB 2021	DiestVMaleAccent1 (Diestrus vs Male, female high/KO upreg, male low/KO downreg)	57	318	2.77821e-14	3.89882	2.06594e-15	131.832	CYFIP2;RAB3C;GMFB;FMR1;LRRK2;PTEN;ARHGAP5;PITPNC1;SYNE1;SPRED1;TRIM2;PHACTR1;PLXNC1;RGS8;GLUL;FAM81A;AGFG1;PCMTD1;MAP3K5;MED1;CAMK1D;CDADC1;DIO2;ZFP91;ASH1L;UHMK1;BCR;TANC1;CREB1;GPD1;SREK1;MGLL;XPR1;KDM7A;RAPGEF4;STAU2;ROCK2;PDE1A;CAMK2A;SLC1A2;PURB;MAPK8;MAP2;FUT9;SRPK2;EGR2;HOMER1;GAD1;KCNIP3;GNG12;BAIAP2;DCLK1;TTC39B;APC;CAMK4;AGO2;THRSP
Genes Down-Regulated In Expression In Forebrain Of 11 Wk SCA1 Spinocerebellar Ataxia 1 Mice GSE2867	HDSigDB 2021	Union of DiestVMaleAccent3 and EstVMaleAccent3 (female low/KO downreg, male high/KO upreg)	57	318	2.77821e-14	3.89882	2.06594e-15	131.832	CYFIP2;RAB3C;GMFB;FMR1;LRRK2;PTEN;ARHGAP5;PITPNC1;SYNE1;SPRED1;TRIM2;PHACTR1;PLXNC1;RGS8;GLUL;FAM81A;AGFG1;PCMTD1;MAP3K5;MED1;CAMK1D;CDADC1;DIO2;ZFP91;ASH1L;UHMK1;BCR;TANC1;CREB1;GPD1;SREK1;MGLL;XPR1;KDM7A;RAPGEF4;STAU2;ROCK2;PDE1A;CAMK2A;SLC1A2;PURB;MAPK8;MAP2;FUT9;SRPK2;EGR2;HOMER1;GAD1;KCNIP3;GNG12;BAIAP2;DCLK1;TTC39B;APC;CAMK4;AGO2;THRSP
LIN28 OE CD34 HUMAN GSE93256 RNASEQ UP	Lit Mined TF Perturbation Signatures	DiestVMaleAccent1 (Diestrus vs Male, female high/KO upreg, male low/KO downreg)	69	411	2.95747e-14	3.62786	7.57937e-17	134.661	PHF3;CCDC71L;SMG1;SETD2;USP34;LDB2;TENT4A;IPO5;NIPBL;PTAR1;EP300;SOX6;UPF2;NCOA1;ARHGEF12;VPS13C;VPS13A;FOS;SPTB;CKAP5;ARID1B;ILF3;NCOR1;XRN1;LCOR;SREK1;BCAT1;SFT2D2;KDM7A;DNMT1;ABHD2;KMT2C;PDS5B;IQGAP2;PDS5A;ADD2;BCLAF1;RMND5A;RAD21;RICTOR;FNIP2;RANBP2;SPECC1;HSPA8;CREBBP;CBX5;DENND4A;CEP350;OGA;HUWE1;PRRC2C;NUP153;HELZ;CFLAR;AP2B1;EEF2;SOD2;PHC3;MED13L;MKLN1;DIAPH1;CNOT1;NEDD4;AGO2;MDM4;TRIP12;…
LIN28 OE CD34 HUMAN GSE93256 RNASEQ UP	Lit Mined TF Perturbation Signatures	EstVMaleAccent1 (Estrus vs Male, female high/KO upreg, male low/KO downreg)	69	411	2.95747e-14	3.62786	7.57937e-17	134.661	PHF3;CCDC71L;SMG1;SETD2;USP34;LDB2;TENT4A;IPO5;NIPBL;PTAR1;EP300;SOX6;UPF2;NCOA1;ARHGEF12;VPS13C;VPS13A;FOS;SPTB;CKAP5;ARID1B;ILF3;NCOR1;XRN1;LCOR;SREK1;BCAT1;SFT2D2;KDM7A;DNMT1;ABHD2;KMT2C;PDS5B;IQGAP2;PDS5A;ADD2;BCLAF1;RMND5A;RAD21;RICTOR;FNIP2;RANBP2;SPECC1;HSPA8;CREBBP;CBX5;DENND4A;CEP350;OGA;HUWE1;PRRC2C;NUP153;HELZ;CFLAR;AP2B1;EEF2;SOD2;PHC3;MED13L;MKLN1;DIAPH1;CNOT1;NEDD4;AGO2;MDM4;TRIP12;…
LIN28 OE CD34 HUMAN GSE93256 RNASEQ UP	Lit Mined TF Perturbation Signatures	DiestVMaleAccent3 (Diestrus vs Male, female low/KO downreg, male high/KO upreg)	69	411	2.95747e-14	3.62786	7.57937e-17	134.661	PHF3;CCDC71L;SMG1;SETD2;USP34;LDB2;TENT4A;IPO5;NIPBL;PTAR1;EP300;SOX6;UPF2;NCOA1;ARHGEF12;VPS13C;VPS13A;FOS;SPTB;CKAP5;ARID1B;ILF3;NCOR1;XRN1;LCOR;SREK1;BCAT1;SFT2D2;KDM7A;DNMT1;ABHD2;KMT2C;PDS5B;IQGAP2;PDS5A;ADD2;BCLAF1;RMND5A;RAD21;RICTOR;FNIP2;RANBP2;SPECC1;HSPA8;CREBBP;CBX5;DENND4A;CEP350;OGA;HUWE1;PRRC2C;NUP153;HELZ;CFLAR;AP2B1;EEF2;SOD2;PHC3;MED13L;MKLN1;DIAPH1;CNOT1;NEDD4;AGO2;MDM4;TRIP12;…
Genes Up-Regulated In HD Grade 4 Markers In Human Caudate Nucleus (HG-U133B) GSE3790	HDSigDB 2021	DiestVMaleAccent1 (Diestrus vs Male, female high/KO upreg, male low/KO downreg)	78	537	4.16111e-14	3.06314	3.11229e-15	102.319	USP34;ARRB1;FMN2;TFCP2L1;RORB;ARHGAP5;OSBPL11;NIPBL;PTAR1;PHACTR3;REV3L;SOX6;ARID2;TEAD1;LIN52;COA5;PAQR8;PCYT1A;VPS13C;RFX3;ZFP91;ASH1L;ZHX1;ARID1B;KCTD6;DNAJC1;SLC25A18;CREB1;LIX1;ATF7;SREK1;INO80D;ARHGEF26;KMT2C;CEP85L;GLIS3;PPM1K;FOXO3;GIGYF2;ZBTB41;GNA13;FGD4;KCTD20;FAM120C;PRKAR2A;NAA25;EIF4EBP2;FNIP1;RNF20;MAP3K2;RFTN2;GSTM3;TCF7L2;ACBD5;DTNA;WTAP;NEBL;MGA;IRF2BP2;BTBD7;KLHL24;GNG12;USF3;S…
Genes Up-Regulated In HD Grade 4 Markers In Human Caudate Nucleus (HG-U133B) GSE3790	HDSigDB 2021	Union of DiestVMaleAccent3 and EstVMaleAccent3 (female low/KO downreg, male high/KO upreg)	78	537	4.16111e-14	3.06314	3.11229e-15	102.319	USP34;ARRB1;FMN2;TFCP2L1;RORB;ARHGAP5;OSBPL11;NIPBL;PTAR1;PHACTR3;REV3L;SOX6;ARID2;TEAD1;LIN52;COA5;PAQR8;PCYT1A;VPS13C;RFX3;ZFP91;ASH1L;ZHX1;ARID1B;KCTD6;DNAJC1;SLC25A18;CREB1;LIX1;ATF7;SREK1;INO80D;ARHGEF26;KMT2C;CEP85L;GLIS3;PPM1K;FOXO3;GIGYF2;ZBTB41;GNA13;FGD4;KCTD20;FAM120C;PRKAR2A;NAA25;EIF4EBP2;FNIP1;RNF20;MAP3K2;RFTN2;GSTM3;TCF7L2;ACBD5;DTNA;WTAP;NEBL;MGA;IRF2BP2;BTBD7;KLHL24;GNG12;USF3;S…
Genes Enriched In Astrocytes Vs Microglia Or Oligodendrocytes PMID23954174	HDSigDB 2021	DiestVMaleAccent1 (Diestrus vs Male, female high/KO upreg, male low/KO downreg)	184	1882	4.26905e-14	2.03266	3.21147e-15	67.834	NCKAP1;ALDH1L1;OXNAD1;CHIC1;AHCYL1;DGKB;CTNND2;FAM107A;KANTR;ABAT;RORB;MSANTD4;FGF1;ARHGAP35;AMOT;PREX2;RGS5;PTAR1;SESN3;DPYSL3;PLS3;PDE8B;GLUL;PAQR8;UNC13C;PHYH;S100A1;RALGAPA1;ACOT11;TMOD2;DIO2;PHKA1;MMD2;ANK2;ASRGL1;BCR;PPP1R3C;LIX1;RUFY3;GPD1;UBE2V2;SIK3;ELMO2;ZFPM2;ALDH7A1;XPR1;LRRC58;LXN;ARHGEF26;ABHD4;MAOB;MAGED1;ANKRD12;SLC1A2;NEDD4L;CREBL2;NDRG2;TTBK2;MAP2;NDP;SRGAP3;GSTM3;TCAF1;GSTM1;DT…
Genes Enriched In Astrocytes Vs Microglia Or Oligodendrocytes PMID23954174	HDSigDB 2021	Union of DiestVMaleAccent3 and EstVMaleAccent3 (female low/KO downreg, male high/KO upreg)	184	1882	4.26905e-14	2.03266	3.21147e-15	67.834	NCKAP1;ALDH1L1;OXNAD1;CHIC1;AHCYL1;DGKB;CTNND2;FAM107A;KANTR;ABAT;RORB;MSANTD4;FGF1;ARHGAP35;AMOT;PREX2;RGS5;PTAR1;SESN3;DPYSL3;PLS3;PDE8B;GLUL;PAQR8;UNC13C;PHYH;S100A1;RALGAPA1;ACOT11;TMOD2;DIO2;PHKA1;MMD2;ANK2;ASRGL1;BCR;PPP1R3C;LIX1;RUFY3;GPD1;UBE2V2;SIK3;ELMO2;ZFPM2;ALDH7A1;XPR1;LRRC58;LXN;ARHGEF26;ABHD4;MAOB;MAGED1;ANKRD12;SLC1A2;NEDD4L;CREBL2;NDRG2;TTBK2;MAP2;NDP;SRGAP3;GSTM3;TCAF1;GSTM1;DT…
Genes Down-Regulated In iSPNs Of R6/2 Vs WT PMID32681824	HDSigDB 2021	DiestVMaleAccent1 (Diestrus vs Male, female high/KO upreg, male low/KO downreg)	88	650	4.77672e-14	2.83443	3.61403e-15	94.2559	CYFIP2;DGKG;NCKAP1;GSK3B;FRMPD4;DGKB;LRRK2;CELF5;ABAT;PPP1R9A;LYST;PITPNC1;DCAF6;SYNE1;SIPA1L1;SESN3;PPP4R4;SCMH1;PHACTR1;ERC2;PDE8B;PCMTD1;CALN1;PPP1R16B;NSF;UNC13C;PRKCI;LYNX1;CAMK1D;KSR2;ANK3;SPTB;BCR;CNKSR2;ARHGEF9;MMP16;GFOD1;LRRC7;SIK3;ATF6;MGLL;JCAD;GAS7;RAPGEF4;NECAB1;STAU2;ROCK2;ABHD2;CAMK2A;NEDD4L;IQGAP2;ADD2;ATXN1;ACVR1C;RMND5A;SV2C;CAMK2N1;FUT9;ZMAT4;GNG7;LRRC4C;ARGLU1;MAPK4;RAP1GAP2;…
Genes Down-Regulated In iSPNs Of R6/2 Vs WT PMID32681824	HDSigDB 2021	Union of DiestVMaleAccent3 and EstVMaleAccent3 (female low/KO downreg, male high/KO upreg)	88	650	4.77672e-14	2.83443	3.61403e-15	94.2559	CYFIP2;DGKG;NCKAP1;GSK3B;FRMPD4;DGKB;LRRK2;CELF5;ABAT;PPP1R9A;LYST;PITPNC1;DCAF6;SYNE1;SIPA1L1;SESN3;PPP4R4;SCMH1;PHACTR1;ERC2;PDE8B;PCMTD1;CALN1;PPP1R16B;NSF;UNC13C;PRKCI;LYNX1;CAMK1D;KSR2;ANK3;SPTB;BCR;CNKSR2;ARHGEF9;MMP16;GFOD1;LRRC7;SIK3;ATF6;MGLL;JCAD;GAS7;RAPGEF4;NECAB1;STAU2;ROCK2;ABHD2;CAMK2A;NEDD4L;IQGAP2;ADD2;ATXN1;ACVR1C;RMND5A;SV2C;CAMK2N1;FUT9;ZMAT4;GNG7;LRRC4C;ARGLU1;MAPK4;RAP1GAP2;…
Genes Up-Regulated In Human HD Neurons Vs Control Neurons PMID32070434	HDSigDB 2021	DiestVMaleAccent1 (Diestrus vs Male, female high/KO upreg, male low/KO downreg)	134	1212	4.87525e-14	2.29082	3.70966e-15	76.1191	ITSN2;OTUD4;TRIO;SPARC;FAM107A;RORB;MSANTD4;NUDT5;IPO7;YY1;SESN3;ZMIZ1;GPBP1;CHORDC1;SLC16A7;GLUL;MAP3K5;PPP1R16B;S100A1;RFX3;ANK2;IPCEF1;HPCAL4;MTURN;WDR82;PKP4;SREK1;NECAB1;INO80D;BHLHB9;LIN7A;TMTC1;PDS5B;FOXO3;PLCXD2;TTBK2;CAMSAP2;GOLGA7B;FUT9;BTBD3;RAD21;G3BP2;MCMBP;STXBP5;TPPP;IP6K1;SOCS7;RAB6B;MCL1;CREBBP;TCAF1;ANKRD26;DENND4A;CEP350;KLHL24;HSPA2;PUM1;PRDX6;SMAD5;PBX1;AZIN1;MED13L;FOSL2;PUM…
Genes Up-Regulated In Human HD Neurons Vs Control Neurons PMID32070434	HDSigDB 2021	Union of DiestVMaleAccent3 and EstVMaleAccent3 (female low/KO downreg, male high/KO upreg)	134	1212	4.87525e-14	2.29082	3.70966e-15	76.1191	ITSN2;OTUD4;TRIO;SPARC;FAM107A;RORB;MSANTD4;NUDT5;IPO7;YY1;SESN3;ZMIZ1;GPBP1;CHORDC1;SLC16A7;GLUL;MAP3K5;PPP1R16B;S100A1;RFX3;ANK2;IPCEF1;HPCAL4;MTURN;WDR82;PKP4;SREK1;NECAB1;INO80D;BHLHB9;LIN7A;TMTC1;PDS5B;FOXO3;PLCXD2;TTBK2;CAMSAP2;GOLGA7B;FUT9;BTBD3;RAD21;G3BP2;MCMBP;STXBP5;TPPP;IP6K1;SOCS7;RAB6B;MCL1;CREBBP;TCAF1;ANKRD26;DENND4A;CEP350;KLHL24;HSPA2;PUM1;PRDX6;SMAD5;PBX1;AZIN1;MED13L;FOSL2;PUM…
Genes Up-Regulated In HD Grade 3 Markers In Human Caudate Nucleus (HG-U133B) GSE3790	HDSigDB 2021	DiestVMaleAccent1 (Diestrus vs Male, female high/KO upreg, male low/KO downreg)	118	1011	5.59379e-14	2.42044	4.28059e-15	80.0795	IKZF2;NUDT5;YY1;PTAR1;GPBP1;LUC7L;SOX6;PAQR8;MED1;RFX3;TUG1;MTURN;KCTD6;UHMK1;TANC1;LIX1;TBL1XR1;RUFY3;SELENOP;ATF7;ANKRD40;LRRC58;SMIM3;INO80D;ARHGEF26;KMT2C;GLIS3;DCUN1D1;SLAIN2;PRKAR2A;DPH3;EIF4EBP2;MCMBP;RIMKLB;UBE2H;ACBD5;DTNA;NEBL;IRF2BP2;BTBD7;KLHL24;FOXN2;GNG12;PHC3;SMAD5;DCLK1;MFHAS1;AFDN;PEX5L;PAN3;MDM4;TCF4;DNAL1;ZCCHC2;HIP1;B4GALT1;USP31;DOCK8;USP34;PTEN;ARRB1;FMN2;ARHGAP5;OSBPL11;CHD…
Genes Up-Regulated In HD Grade 3 Markers In Human Caudate Nucleus (HG-U133B) GSE3790	HDSigDB 2021	Union of DiestVMaleAccent3 and EstVMaleAccent3 (female low/KO downreg, male high/KO upreg)	118	1011	5.59379e-14	2.42044	4.28059e-15	80.0795	IKZF2;NUDT5;YY1;PTAR1;GPBP1;LUC7L;SOX6;PAQR8;MED1;RFX3;TUG1;MTURN;KCTD6;UHMK1;TANC1;LIX1;TBL1XR1;RUFY3;SELENOP;ATF7;ANKRD40;LRRC58;SMIM3;INO80D;ARHGEF26;KMT2C;GLIS3;DCUN1D1;SLAIN2;PRKAR2A;DPH3;EIF4EBP2;MCMBP;RIMKLB;UBE2H;ACBD5;DTNA;NEBL;IRF2BP2;BTBD7;KLHL24;FOXN2;GNG12;PHC3;SMAD5;DCLK1;MFHAS1;AFDN;PEX5L;PAN3;MDM4;TCF4;DNAL1;ZCCHC2;HIP1;B4GALT1;USP31;DOCK8;USP34;PTEN;ARRB1;FMN2;ARHGAP5;OSBPL11;CHD…
Expression In 22 Mon CHL2 HD Mice GSE10202	HDSigDB 2021	DiestVMaleAccent1 (Diestrus vs Male, female high/KO upreg, male low/KO downreg)	320	3915	5.88557e-14	1.74424	4.52932e-15	57.609	CYFIP2;CYFIP1;NCKAP1;AHCYL1;TRIO;NEXMIF;ARAF;CCNC;UBE2L3;RPS6KA3;RNF114;DPYSL3;CHORDC1;LUC7L;GLUL;CALN1;UNC13C;PRKCI;MRTFB;MMD2;SOX11;ANK3;HPCAL4;BCR;AR;SNHG14;RUFY3;SIK3;TMEM126B;ATF6;NECAB1;MAGED1;LYPD1;NEDD4L;IQGAP2;GIGYF2;TTBK2;MAP2;PRKAR2A;DHX36;DPH3;STXBP5;MAP4;SCAI;PCK2;FZD3;EGR3;HOMER1;HOMER2;TIPARP;EDEM1;IQSEC3;SMARCA5;RAB27B;HSPA12A;ACADSB;DCLK1;POU6F1;EHD3;LAS1L;AGO4;MYO5B;AGO2;KYAT3;A…
Expression In 22 Mon CHL2 HD Mice GSE10202	HDSigDB 2021	Union of DiestVMaleAccent3 and EstVMaleAccent3 (female low/KO downreg, male high/KO upreg)	320	3915	5.88557e-14	1.74424	4.52932e-15	57.609	CYFIP2;CYFIP1;NCKAP1;AHCYL1;TRIO;NEXMIF;ARAF;CCNC;UBE2L3;RPS6KA3;RNF114;DPYSL3;CHORDC1;LUC7L;GLUL;CALN1;UNC13C;PRKCI;MRTFB;MMD2;SOX11;ANK3;HPCAL4;BCR;AR;SNHG14;RUFY3;SIK3;TMEM126B;ATF6;NECAB1;MAGED1;LYPD1;NEDD4L;IQGAP2;GIGYF2;TTBK2;MAP2;PRKAR2A;DHX36;DPH3;STXBP5;MAP4;SCAI;PCK2;FZD3;EGR3;HOMER1;HOMER2;TIPARP;EDEM1;IQSEC3;SMARCA5;RAB27B;HSPA12A;ACADSB;DCLK1;POU6F1;EHD3;LAS1L;AGO4;MYO5B;AGO2;KYAT3;A…
Genes Down-Regulated In Pvalb/Th-expressing Interneurons Of HD Patients Vs Control PMID32681824	HDSigDB 2021	DiestVMaleAccent1 (Diestrus vs Male, female high/KO upreg, male low/KO downreg)	166	1641	6.06748e-14	2.09726	4.69554e-15	69.1932	OTUD4;CYFIP1;DGKD;UBE3C;FRMPD4;DGKB;NEXMIF;UBE3A;NUDT5;ACTB;SCMH1;LUC7L;TRAPPC13;KPNA3;TBC1D22A;KPNA1;MAP3K5;MEF2A;NSF;RALGAPA1;ACOT11;TMOD2;RALGAPB;RUFY3;PAPPA;XRN2;ANAPC1;MTMR1;TMEM87A;NECAB1;CUL5;MAX;MAGED1;MYCBP2;GMPS;MTMR4;GIGYF2;ARHGAP12;SULT1A1;EPB41L5;FUT9;DHX36;ABL2;STXBP5;RIMKLB;ARGLU1;LONRF2;ZKSCAN1;ZRANB3;ANKRD26;PHC1;DENND4A;GFPT1;KLHL28;EXOC6B;OGA;DSTN;HOOK3;TMEM196;ST18;PUM2;CCDC88…
Genes Down-Regulated In Pvalb/Th-expressing Interneurons Of HD Patients Vs Control PMID32681824	HDSigDB 2021	Union of DiestVMaleAccent3 and EstVMaleAccent3 (female low/KO downreg, male high/KO upreg)	166	1641	6.06748e-14	2.09726	4.69554e-15	69.1932	OTUD4;CYFIP1;DGKD;UBE3C;FRMPD4;DGKB;NEXMIF;UBE3A;NUDT5;ACTB;SCMH1;LUC7L;TRAPPC13;KPNA3;TBC1D22A;KPNA1;MAP3K5;MEF2A;NSF;RALGAPA1;ACOT11;TMOD2;RALGAPB;RUFY3;PAPPA;XRN2;ANAPC1;MTMR1;TMEM87A;NECAB1;CUL5;MAX;MAGED1;MYCBP2;GMPS;MTMR4;GIGYF2;ARHGAP12;SULT1A1;EPB41L5;FUT9;DHX36;ABL2;STXBP5;RIMKLB;ARGLU1;LONRF2;ZKSCAN1;ZRANB3;ANKRD26;PHC1;DENND4A;GFPT1;KLHL28;EXOC6B;OGA;DSTN;HOOK3;TMEM196;ST18;PUM2;CCDC88…
Genes Up-Regulated In iSPNs Of 6 Mon HdhQ111 Vs HdhQ20 PMID32681824	HDSigDB 2021	DiestVMaleAccent1 (Diestrus vs Male, female high/KO upreg, male low/KO downreg)	105	858	9.18355e-14	2.54048	7.14673e-15	82.7488	CCDC71L;CHIC1;PANK3;SPARC;FGF1;AMOT;PREX2;PTAR1;TATDN1;GNPTAB;DPYSL3;KIF5A;NFATC2IP;PLS3;SOX6;PHYH;ANK2;SOX11;MYT1;UHMK1;PPP1R3C;LIX1;SELENOP;ATF7;PKP4;ANKRD40;RIN2;LRRC58;ATP6V1A;MAOB;KMT2C;MYCBP2;SLC1A2;RASAL2;FOXO3;NDRG2;PLCXD2;MED12L;RAD21;UBR5;GSTM1;DTNA;CAV2;HOMER2;EDEM1;CEP350;IQSEC3;KLHL24;PRDX6;ST18;PUM2;TCF4;CPEB2;GSTM5;PYGB;LRSAM1;USP34;FMN2;WDR44;NHSL1;REV3L;IDS;SPTAN1;TEAD1;TIMP4;HSD…
Genes Up-Regulated In iSPNs Of 6 Mon HdhQ111 Vs HdhQ20 PMID32681824	HDSigDB 2021	Union of DiestVMaleAccent3 and EstVMaleAccent3 (female low/KO downreg, male high/KO upreg)	105	858	9.18355e-14	2.54048	7.14673e-15	82.7488	CCDC71L;CHIC1;PANK3;SPARC;FGF1;AMOT;PREX2;PTAR1;TATDN1;GNPTAB;DPYSL3;KIF5A;NFATC2IP;PLS3;SOX6;PHYH;ANK2;SOX11;MYT1;UHMK1;PPP1R3C;LIX1;SELENOP;ATF7;PKP4;ANKRD40;RIN2;LRRC58;ATP6V1A;MAOB;KMT2C;MYCBP2;SLC1A2;RASAL2;FOXO3;NDRG2;PLCXD2;MED12L;RAD21;UBR5;GSTM1;DTNA;CAV2;HOMER2;EDEM1;CEP350;IQSEC3;KLHL24;PRDX6;ST18;PUM2;TCF4;CPEB2;GSTM5;PYGB;LRSAM1;USP34;FMN2;WDR44;NHSL1;REV3L;IDS;SPTAN1;TEAD1;TIMP4;HSD…
Liver RNA M14 Module (Cyan) PMID26900923	HDSigDB 2021	DiestVMaleAccent1 (Diestrus vs Male, female high/KO upreg, male low/KO downreg)	116	996	1.11518e-13	2.4114	8.72669e-15	78.0629	ANKRD13C;DGKD;GDA;CSE1L;OGDHL;PRDM2;UBE3A;IPO7;ARHGAP35;ALKBH5;CHORDC1;KPNA6;NFATC2IP;PPFIA1;LUC7L;KPNA4;KPNA1;MRTFB;LARP4B;MOSMO;RALGAPB;WDR82;PKP4;ATF6;ANAPC1;XPR1;MEAF6;MAX;MYCBP2;GMPS;CLEC16A;NOLC1;UBFD1;SLAIN2;PIK3R1;GIGYF2;CAMSAP2;PRKAR2A;UBR5;STXBP5;RPRD1B;KLHDC10;HSPA8;ANKRD26;CPSF6;CEP350;SEC16A;SMARCA5;CNOT4;MFHAS1;DMXL1;KYAT3;ACBD3;EIF4G2;PICALM;RBM27;GSK3B;KDM5C;USP31;USP34;TENT4A;SMG…
Liver RNA M14 Module (Cyan) PMID26900923	HDSigDB 2021	Union of DiestVMaleAccent3 and EstVMaleAccent3 (female low/KO downreg, male high/KO upreg)	116	996	1.11518e-13	2.4114	8.72669e-15	78.0629	ANKRD13C;DGKD;GDA;CSE1L;OGDHL;PRDM2;UBE3A;IPO7;ARHGAP35;ALKBH5;CHORDC1;KPNA6;NFATC2IP;PPFIA1;LUC7L;KPNA4;KPNA1;MRTFB;LARP4B;MOSMO;RALGAPB;WDR82;PKP4;ATF6;ANAPC1;XPR1;MEAF6;MAX;MYCBP2;GMPS;CLEC16A;NOLC1;UBFD1;SLAIN2;PIK3R1;GIGYF2;CAMSAP2;PRKAR2A;UBR5;STXBP5;RPRD1B;KLHDC10;HSPA8;ANKRD26;CPSF6;CEP350;SEC16A;SMARCA5;CNOT4;MFHAS1;DMXL1;KYAT3;ACBD3;EIF4G2;PICALM;RBM27;GSK3B;KDM5C;USP31;USP34;TENT4A;SMG…
HD Grade 4 Markers In Human Caudate Nucleus (HG-U133B) GSE3790	HDSigDB 2021	DiestVMaleAccent1 (Diestrus vs Male, female high/KO upreg, male low/KO downreg)	94	735	1.79783e-13	2.65885	1.41464e-14	84.7889	RIPOR1;USP34;CELF5;ARRB1;FMN2;TFCP2L1;RORB;ARHGAP5;OSBPL11;NIPBL;PTAR1;SYNGAP1;NCS1;KIF5A;PHACTR3;REV3L;SOX6;ARID2;TEAD1;LIN52;COA5;PAQR8;PCYT1A;VPS13C;RFX3;ZFP91;ASH1L;DUSP8;ZHX1;ARID1B;KCTD6;STX1B;DNAJC1;SLC25A18;CREB1;LRRC7;LIX1;DOK6;ATF7;RELCH;SREK1;INO80D;ARHGEF26;STAU2;KMT2C;CEP85L;AGAP2;GLIS3;TMTC1;PPM1K;FOXO3;GIGYF2;ZBTB41;GNA13;FGD4;KCTD20;FAM120C;PRKAR2A;NAA25;EIF4EBP2;FNIP1;RAB11FIP4;R…
HD Grade 4 Markers In Human Caudate Nucleus (HG-U133B) GSE3790	HDSigDB 2021	Union of DiestVMaleAccent3 and EstVMaleAccent3 (female low/KO downreg, male high/KO upreg)	94	735	1.79783e-13	2.65885	1.41464e-14	84.7889	RIPOR1;USP34;CELF5;ARRB1;FMN2;TFCP2L1;RORB;ARHGAP5;OSBPL11;NIPBL;PTAR1;SYNGAP1;NCS1;KIF5A;PHACTR3;REV3L;SOX6;ARID2;TEAD1;LIN52;COA5;PAQR8;PCYT1A;VPS13C;RFX3;ZFP91;ASH1L;DUSP8;ZHX1;ARID1B;KCTD6;STX1B;DNAJC1;SLC25A18;CREB1;LRRC7;LIX1;DOK6;ATF7;RELCH;SREK1;INO80D;ARHGEF26;STAU2;KMT2C;CEP85L;AGAP2;GLIS3;TMTC1;PPM1K;FOXO3;GIGYF2;ZBTB41;GNA13;FGD4;KCTD20;FAM120C;PRKAR2A;NAA25;EIF4EBP2;FNIP1;RAB11FIP4;R…
Genes Changed In Sodium Butyrate Treated STHdhQ111 Vs Control GSE129143	HDSigDB 2021	DiestVMaleAccent1 (Diestrus vs Male, female high/KO upreg, male low/KO downreg)	337	4219	1.99125e-13	1.70633	1.57544e-14	54.2301	ITSN2;CYFIP2;NCKAP1;GMFB;TRIO;PANK3;ZFYVE9;TRRAP;KLHDC7A;ACTB;ALKBH8;RPS6KA3;ALKBH5;PEG13;DPYSL5;GLUL;AGFG1;MEF2A;MRTFB;AP1B1;PHKA1;HPCAL4;ASRGL1;THAP2;UHMK1;BCR;MARF1;XRN1;XRN2;SUCLG2;ATF7;RELCH;ATF6;CLOCK;MTMR1;EPAS1;MYCBP2;AGAP2;BAZ2A;SLAIN2;MTMR4;MED12L;PRKAR2A;STXBP5;PCK2;GSTM3;CREBBP;GSTM1;PHC1;EDEM1;INTS2;EXOC6B;PRRC2C;IRF2BP2;PHC3;PRDX6;MED13L;PUM2;AGO4;AGO1;AGO2;ANP32E;FXYD6;CDK12;CPEB2;…
Genes Changed In Sodium Butyrate Treated STHdhQ111 Vs Control GSE129143	HDSigDB 2021	Union of DiestVMaleAccent3 and EstVMaleAccent3 (female low/KO downreg, male high/KO upreg)	337	4219	1.99125e-13	1.70633	1.57544e-14	54.2301	ITSN2;CYFIP2;NCKAP1;GMFB;TRIO;PANK3;ZFYVE9;TRRAP;KLHDC7A;ACTB;ALKBH8;RPS6KA3;ALKBH5;PEG13;DPYSL5;GLUL;AGFG1;MEF2A;MRTFB;AP1B1;PHKA1;HPCAL4;ASRGL1;THAP2;UHMK1;BCR;MARF1;XRN1;XRN2;SUCLG2;ATF7;RELCH;ATF6;CLOCK;MTMR1;EPAS1;MYCBP2;AGAP2;BAZ2A;SLAIN2;MTMR4;MED12L;PRKAR2A;STXBP5;PCK2;GSTM3;CREBBP;GSTM1;PHC1;EDEM1;INTS2;EXOC6B;PRRC2C;IRF2BP2;PHC3;PRDX6;MED13L;PUM2;AGO4;AGO1;AGO2;ANP32E;FXYD6;CDK12;CPEB2;…
Genes Up-Regulated In Cerebellum Of 12 Week Old Atxn1[154Q/2Q] Vs WT GSE122099	HDSigDB 2021	DiestVMaleAccent1 (Diestrus vs Male, female high/KO upreg, male low/KO downreg)	106	881	2.06165e-13	2.49135	1.64005e-14	79.0792	CCDC71L;CYFIP1;DGKD;PANK3;FMR1;SLK;MAP3K5;UNC13C;PRKCI;EIF1AX;IPCEF1;FBXO11;MYT1;XRN1;GPD1;XRN2;ELMO2;HECA;RELCH;ZFPM2;CLOCK;MTMR1;NECAB1;PIK3R1;IQGAP2;NYAP2;CAMSAP2;FUT9;RAD21;DHX36;TASOR;ABL2;STXBP5;ARGLU1;MCL1;KLHDC10;CREBBP;HOMER2;INTS2;BBIP1;KLHL24;FOXN2;ST18;MED13L;PUM2;EHD3;SLC6A8;AGO1;FXYD6;TCF4;RBM27;PHF3;TOP2B;KDM5B;CDKN1B;HIP1;OSBPL11;BICD1;WDR44;NIPBL;MED13;DENND11;REV3L;CEP170;PHACTR…
Genes Up-Regulated In Cerebellum Of 12 Week Old Atxn1[154Q/2Q] Vs WT GSE122099	HDSigDB 2021	Union of DiestVMaleAccent3 and EstVMaleAccent3 (female low/KO downreg, male high/KO upreg)	106	881	2.06165e-13	2.49135	1.64005e-14	79.0792	CCDC71L;CYFIP1;DGKD;PANK3;FMR1;SLK;MAP3K5;UNC13C;PRKCI;EIF1AX;IPCEF1;FBXO11;MYT1;XRN1;GPD1;XRN2;ELMO2;HECA;RELCH;ZFPM2;CLOCK;MTMR1;NECAB1;PIK3R1;IQGAP2;NYAP2;CAMSAP2;FUT9;RAD21;DHX36;TASOR;ABL2;STXBP5;ARGLU1;MCL1;KLHDC10;CREBBP;HOMER2;INTS2;BBIP1;KLHL24;FOXN2;ST18;MED13L;PUM2;EHD3;SLC6A8;AGO1;FXYD6;TCF4;RBM27;PHF3;TOP2B;KDM5B;CDKN1B;HIP1;OSBPL11;BICD1;WDR44;NIPBL;MED13;DENND11;REV3L;CEP170;PHACTR…
Genes Changed In Pons Of ATXN3 KO Mice GSE117605	HDSigDB 2021	DiestVMaleAccent1 (Diestrus vs Male, female high/KO upreg, male low/KO downreg)	146	1394	2.11671e-13	2.16224	1.693e-14	68.564	DGKG;CHIC1;PRDM9;CTNND2;RORB;IKZF2;ZMIZ1;SCMH1;EP300;PLCE1;KMT5A;ARID2;USP8;S100A1;MAGI2;MRTFB;ANK2;ANK3;ATG12;DCTD;MARF1;SIK3;PKP4;CLOCK;XPR1;LRRC58;INO80D;SHC3;KMT2A;EPAS1;KMT2C;CEP85L;ANKRD12;GLIS3;LIN7A;RASAL2;PDS5A;GIGYF2;MED12L;CAMSAP2;EPB41L5;FUT9;SNTG1;MAP2;STXBP5;ARGLU1;ZKSCAN1;CREBBP;FZD3;CEP350;PRRC2C;HELZ;HOOK3;HSPA2;PHC3;CNOT4;ARHGAP32;FER;AGO3;NBEA;PDCL;NF1;CDK12;CPEB2;CPEB4;RBM27;R…
Genes Changed In Pons Of ATXN3 KO Mice GSE117605	HDSigDB 2021	Union of DiestVMaleAccent3 and EstVMaleAccent3 (female low/KO downreg, male high/KO upreg)	146	1394	2.11671e-13	2.16224	1.693e-14	68.564	DGKG;CHIC1;PRDM9;CTNND2;RORB;IKZF2;ZMIZ1;SCMH1;EP300;PLCE1;KMT5A;ARID2;USP8;S100A1;MAGI2;MRTFB;ANK2;ANK3;ATG12;DCTD;MARF1;SIK3;PKP4;CLOCK;XPR1;LRRC58;INO80D;SHC3;KMT2A;EPAS1;KMT2C;CEP85L;ANKRD12;GLIS3;LIN7A;RASAL2;PDS5A;GIGYF2;MED12L;CAMSAP2;EPB41L5;FUT9;SNTG1;MAP2;STXBP5;ARGLU1;ZKSCAN1;CREBBP;FZD3;CEP350;PRRC2C;HELZ;HOOK3;HSPA2;PHC3;CNOT4;ARHGAP32;FER;AGO3;NBEA;PDCL;NF1;CDK12;CPEB2;CPEB4;RBM27;R…
Down-regulated Genes In Human Neurodegenerative Prefrontal Cortex PMID29375298	HDSigDB 2021	DiestVMaleAccent1 (Diestrus vs Male, female high/KO upreg, male low/KO downreg)	211	2305	2.59876e-13	1.90263	2.08979e-14	59.9312	CYFIP2;CHIC1;GMFB;PANK3;PLEKHB2;ZFYVE9;FRMPD4;NEXMIF;IPP;CCNC;ALKBH8;DCAF6;PPP4R4;CALN1;MEF2A;MEF2C;ANK2;ANK3;WDR82;RUFY3;RELCH;MEAF6;PDE1A;MYCBP2;MTMR9;NOLC1;PIK3R1;MTMR4;NYAP2;LARP1;MAP2;DHX36;STXBP5;SCAI;ZRANB3;SRPK2;HOMER1;HOMER2;EDEM1;EXOC6B;RAB27B;HSPA12A;ACADSB;PBX1;DCLK1;FAM135B;EHD3;AGO1;KYAT3;CDK14;TOP2B;HBS1L;CSRNP3;NRSN1;CLTC;SNX12;CROT;SH3RF1;WDR44;TRIM2;ARIH1;BBS4;ZYG11B;LYNX1;WDR37…
Down-regulated Genes In Human Neurodegenerative Prefrontal Cortex PMID29375298	HDSigDB 2021	Union of DiestVMaleAccent3 and EstVMaleAccent3 (female low/KO downreg, male high/KO upreg)	211	2305	2.59876e-13	1.90263	2.08979e-14	59.9312	CYFIP2;CHIC1;GMFB;PANK3;PLEKHB2;ZFYVE9;FRMPD4;NEXMIF;IPP;CCNC;ALKBH8;DCAF6;PPP4R4;CALN1;MEF2A;MEF2C;ANK2;ANK3;WDR82;RUFY3;RELCH;MEAF6;PDE1A;MYCBP2;MTMR9;NOLC1;PIK3R1;MTMR4;NYAP2;LARP1;MAP2;DHX36;STXBP5;SCAI;ZRANB3;SRPK2;HOMER1;HOMER2;EDEM1;EXOC6B;RAB27B;HSPA12A;ACADSB;PBX1;DCLK1;FAM135B;EHD3;AGO1;KYAT3;CDK14;TOP2B;HBS1L;CSRNP3;NRSN1;CLTC;SNX12;CROT;SH3RF1;WDR44;TRIM2;ARIH1;BBS4;ZYG11B;LYNX1;WDR37…
HD Markers In Human Caudate Nucleus (HG-U133A) E-AFMX-6	HDSigDB 2021	DiestVMaleAccent1 (Diestrus vs Male, female high/KO upreg, male low/KO downreg)	74	513	2.92938e-13	3.0299	2.36832e-14	95.0601	NRSN1;CSRNP3;FRMPD4;NEXMIF;CELF5;ARRB1;ARHGAP5;OSBPL11;IKZF2;SYNE1;RIMS1;PPP4R4;NCS1;KIF5A;RGS8;CALN1;MKKS;CAMK1D;SGIP1;DIO2;VPS13A;KSR2;FAM126B;PTGR2;PGM2L1;PHF20L1;CNKSR2;LRRC7;LIX1;DOK6;BCAT1;B4GALT6;JCAD;SHANK2;NECAB1;ARHGEF26;AGAP2;GLIS3;NEDD4L;AKAP5;PLCXD2;GNA13;MAP2;CAMK2N1;GNG7;REPS2;MAP4;LRRC4C;ARGLU1;LONRF2;SCAI;RFTN2;DTNA;HOMER1;NEBL;IRF2BP2;SORBS2;CFLAR;KLHL24;ARHGAP26;TMEM196;SVIP;SM…
HD Markers In Human Caudate Nucleus (HG-U133A) E-AFMX-6	HDSigDB 2021	Union of DiestVMaleAccent3 and EstVMaleAccent3 (female low/KO downreg, male high/KO upreg)	74	513	2.92938e-13	3.0299	2.36832e-14	95.0601	NRSN1;CSRNP3;FRMPD4;NEXMIF;CELF5;ARRB1;ARHGAP5;OSBPL11;IKZF2;SYNE1;RIMS1;PPP4R4;NCS1;KIF5A;RGS8;CALN1;MKKS;CAMK1D;SGIP1;DIO2;VPS13A;KSR2;FAM126B;PTGR2;PGM2L1;PHF20L1;CNKSR2;LRRC7;LIX1;DOK6;BCAT1;B4GALT6;JCAD;SHANK2;NECAB1;ARHGEF26;AGAP2;GLIS3;NEDD4L;AKAP5;PLCXD2;GNA13;MAP2;CAMK2N1;GNG7;REPS2;MAP4;LRRC4C;ARGLU1;LONRF2;SCAI;RFTN2;DTNA;HOMER1;NEBL;IRF2BP2;SORBS2;CFLAR;KLHL24;ARHGAP26;TMEM196;SVIP;SM…
Genes Changed In iSPNs Of 6 Mon HdhQ111 Vs HdhQ20 PMID32681824	HDSigDB 2021	DiestVMaleAccent1 (Diestrus vs Male, female high/KO upreg, male low/KO downreg)	149	1441	3.10216e-13	2.13291	2.52143e-14	66.7843	CYFIP2;CCDC71L;NCKAP1;CHIC1;PANK3;SPARC;MTRR;DGKB;FGF1;AMOT;PREX2;PTAR1;TATDN1;GNPTAB;PPP4R4;DPYSL3;KIF5A;NFATC2IP;PLS3;SOX6;PDE8B;CALN1;PHYH;ANK2;SOX11;HPCAL4;MYT1;UHMK1;BCR;DCTD;PPP1R3C;LIX1;GPD1;SELENOP;ELMO2;ATF7;PKP4;ANKRD40;SREK1;RIN2;LRRC58;ATP6V1A;NECAB1;MAOB;KMT2C;MYCBP2;SLC1A2;AGAP2;NOLC1;NEDD4L;RASAL2;FOXO3;NDRG2;PLCXD2;MED12L;ATXN1;RAD21;UBR5;GSTM1;DTNA;HOMER1;CAV2;HOMER2;EDEM1;CEP350…
Genes Changed In iSPNs Of 6 Mon HdhQ111 Vs HdhQ20 PMID32681824	HDSigDB 2021	Union of DiestVMaleAccent3 and EstVMaleAccent3 (female low/KO downreg, male high/KO upreg)	149	1441	3.10216e-13	2.13291	2.52143e-14	66.7843	CYFIP2;CCDC71L;NCKAP1;CHIC1;PANK3;SPARC;MTRR;DGKB;FGF1;AMOT;PREX2;PTAR1;TATDN1;GNPTAB;PPP4R4;DPYSL3;KIF5A;NFATC2IP;PLS3;SOX6;PDE8B;CALN1;PHYH;ANK2;SOX11;HPCAL4;MYT1;UHMK1;BCR;DCTD;PPP1R3C;LIX1;GPD1;SELENOP;ELMO2;ATF7;PKP4;ANKRD40;SREK1;RIN2;LRRC58;ATP6V1A;NECAB1;MAOB;KMT2C;MYCBP2;SLC1A2;AGAP2;NOLC1;NEDD4L;RASAL2;FOXO3;NDRG2;PLCXD2;MED12L;ATXN1;RAD21;UBR5;GSTM1;DTNA;HOMER1;CAV2;HOMER2;EDEM1;CEP350…
Genes Down-Regulated In dSPNs Of zQ175DN Vs WT PMID32681824	HDSigDB 2021	DiestVMaleAccent1 (Diestrus vs Male, female high/KO upreg, male low/KO downreg)	69	463	4.47257e-13	3.14024	3.65463e-14	97.1595	CYFIP2;NCKAP1;RAB3C;GSK3B;THRB;DGKB;LRRK2;CELF5;ABAT;PPP1R9A;PITPNC1;SPRED1;SIPA1L1;PPP4R4;PSD3;PHACTR1;ERC2;PDE8B;PCMTD1;PPP1R16B;UNC13C;CAMK1D;BCR;CNKSR2;DNAJC1;ZEB1;MMP16;LRRC7;SIK3;ATF6;JCAD;XPR1;KDM7A;RAPGEF4;SHC3;ROCK2;CAMK2A;NEDD4L;RASAL2;IQGAP2;BTAF1;ATXN1;ZMAT4;GNG7;ARGLU1;MAPK4;RANBP2;TCAF1;HOMER1;NEBL;KCNIP3;KLHL2;SORBS2;AP2B1;SORBS1;BAIAP2;DCLK1;ARHGAP33;ARHGAP32;DIAPH2;DLG2;GNAL;PDE1…
Genes Down-Regulated In dSPNs Of zQ175DN Vs WT PMID32681824	HDSigDB 2021	Union of DiestVMaleAccent3 and EstVMaleAccent3 (female low/KO downreg, male high/KO upreg)	69	463	4.47257e-13	3.14024	3.65463e-14	97.1595	CYFIP2;NCKAP1;RAB3C;GSK3B;THRB;DGKB;LRRK2;CELF5;ABAT;PPP1R9A;PITPNC1;SPRED1;SIPA1L1;PPP4R4;PSD3;PHACTR1;ERC2;PDE8B;PCMTD1;PPP1R16B;UNC13C;CAMK1D;BCR;CNKSR2;DNAJC1;ZEB1;MMP16;LRRC7;SIK3;ATF6;JCAD;XPR1;KDM7A;RAPGEF4;SHC3;ROCK2;CAMK2A;NEDD4L;RASAL2;IQGAP2;BTAF1;ATXN1;ZMAT4;GNG7;ARGLU1;MAPK4;RANBP2;TCAF1;HOMER1;NEBL;KCNIP3;KLHL2;SORBS2;AP2B1;SORBS1;BAIAP2;DCLK1;ARHGAP33;ARHGAP32;DIAPH2;DLG2;GNAL;PDE1…
Alzheimer Disease Down-Regulated Genes In CA1 Area Of Hippocampus Liang PMID18270320	HDSigDB 2021	DiestVMaleAccent1 (Diestrus vs Male, female high/KO upreg, male low/KO downreg)	232	2626	4.47369e-13	1.8406	3.68599e-14	56.9328	CYFIP2;IPO11;CHIC1;GMFB;PLEKHB2;MSANTD4;ACTB;UBE2L3;ALKBH5;PPP2R1A;GPBP1;LUC7L;MEF2A;MED1;UNC13C;PRKCI;OXSM;ANK2;HPCAL4;MTURN;BCR;MARF1;RUFY3;SIK3;RELCH;ZFPM2;ATF6;TMEM87A;SET;MEAF6;MAOB;MAGED1;NOLC1;NEDD4L;MTMR4;SMIM7;DHX36;MAP4;ARGLU1;SRPK2;PHC1;NEBL;EDEM1;EXOC6B;BBIP1;HSPA12A;PUM1;FOSL2;PUM2;CCDC88A;EHD3;NMT1;ECHDC1;ANP32E;MAGED2;PAM;EZH1;PYGB;HBS1L;CLTC;ARHGAP5;SMG7;LYST;DSTYK;SIPA1L1;TRIM2;N…
Genes Up-Regulated In HD Markers In Human Blood GSE1751	HDSigDB 2021	DiestVMaleAccent1 (Diestrus vs Male, female high/KO upreg, male low/KO downreg)	160	1597	4.47369e-13	2.06618	3.69423e-14	63.9057	ITSN2;OTUD4;GMFB;AHCYL1;TRIO;PANK3;MTRR;UBXN2B;NAB1;FMR1;SLA;CCNC;UBE3A;IPO7;YY1;DOCK10;SLK;SCP2;PLXNC1;KPNA3;KPNA1;MEF2A;USP8;MEF2C;PRKCI;EIF1AX;RALGAPA1;MRTFB;DYRK1A;ANK3;LARP4B;FBXO11;ATG12;DCTD;TBL1XR1;SUCLG2;HECA;KCTD12;SREK1;ATF6;RIN2;TMEM87A;SET;CUL5;MAOB;GLO1;ANKRD12;DCUN1D1;CREBL2;PDS5B;IQGAP2;PDS5A;ATXN1;RAD21;TASOR;UBR5;G3BP2;MCMBP;ARGLU1;MCL1;KLHDC10;SRPK2;DENND4A;TIPARP;CEP350;IDH1;G…
Alzheimer Disease Down-Regulated Genes In CA1 Area Of Hippocampus Liang PMID18270320	HDSigDB 2021	Union of DiestVMaleAccent3 and EstVMaleAccent3 (female low/KO downreg, male high/KO upreg)	232	2626	4.47369e-13	1.8406	3.68599e-14	56.9328	CYFIP2;IPO11;CHIC1;GMFB;PLEKHB2;MSANTD4;ACTB;UBE2L3;ALKBH5;PPP2R1A;GPBP1;LUC7L;MEF2A;MED1;UNC13C;PRKCI;OXSM;ANK2;HPCAL4;MTURN;BCR;MARF1;RUFY3;SIK3;RELCH;ZFPM2;ATF6;TMEM87A;SET;MEAF6;MAOB;MAGED1;NOLC1;NEDD4L;MTMR4;SMIM7;DHX36;MAP4;ARGLU1;SRPK2;PHC1;NEBL;EDEM1;EXOC6B;BBIP1;HSPA12A;PUM1;FOSL2;PUM2;CCDC88A;EHD3;NMT1;ECHDC1;ANP32E;MAGED2;PAM;EZH1;PYGB;HBS1L;CLTC;ARHGAP5;SMG7;LYST;DSTYK;SIPA1L1;TRIM2;N…
Genes Up-Regulated In HD Markers In Human Blood GSE1751	HDSigDB 2021	Union of DiestVMaleAccent3 and EstVMaleAccent3 (female low/KO downreg, male high/KO upreg)	160	1597	4.47369e-13	2.06618	3.69423e-14	63.9057	ITSN2;OTUD4;GMFB;AHCYL1;TRIO;PANK3;MTRR;UBXN2B;NAB1;FMR1;SLA;CCNC;UBE3A;IPO7;YY1;DOCK10;SLK;SCP2;PLXNC1;KPNA3;KPNA1;MEF2A;USP8;MEF2C;PRKCI;EIF1AX;RALGAPA1;MRTFB;DYRK1A;ANK3;LARP4B;FBXO11;ATG12;DCTD;TBL1XR1;SUCLG2;HECA;KCTD12;SREK1;ATF6;RIN2;TMEM87A;SET;CUL5;MAOB;GLO1;ANKRD12;DCUN1D1;CREBL2;PDS5B;IQGAP2;PDS5A;ATXN1;RAD21;TASOR;UBR5;G3BP2;MCMBP;ARGLU1;MCL1;KLHDC10;SRPK2;DENND4A;TIPARP;CEP350;IDH1;G…
Genes Changed In Pons Of 28 Week Old WT Mice Vs Atxn 1 154Q/2Q Mice Both Treated With Vehicle GSE114674	HDSigDB 2021	DiestVMaleAccent1 (Diestrus vs Male, female high/KO upreg, male low/KO downreg)	280	3352	4.56552e-13	1.75708	3.78979e-14	54.3007	NCKAP1;GMFB;AHCYL1;SPARC;TRRAP;NEXMIF;KLHDC7A;IKZF2;NUDT5;RNF114;CHORDC1;GLUL;CALN1;MEF2A;PAQR8;UNC13C;SAP30BP;OXSM;PHKA1;MMD2;SOX11;ASRGL1;ATG12;UHMK1;MOSMO;STX1B;SNHG14;MARF1;PPP1R3C;XRN1;PAPPA;XRN2;TMEM126B;ZFPM2;RIN2;SMIM3;MTMR1;LXN;ANAPC15;MEAF6;SDC4;MAGED1;LYPD1;PLA2G6;STXBP5;MAP4;RIMKLB;ARGLU1;GSTM3;CREBBP;GSTM1;HOMER1;NEBL;EDEM1;INTS2;IQSEC3;PRRC2C;IRF2BP2;HSPA12A;PUM1;PRDX6;MED13L;FOSL2;…
Genes Changed In Pons Of 28 Week Old WT Mice Vs Atxn 1 154Q/2Q Mice Both Treated With Vehicle GSE114674	HDSigDB 2021	Union of DiestVMaleAccent3 and EstVMaleAccent3 (female low/KO downreg, male high/KO upreg)	280	3352	4.56552e-13	1.75708	3.78979e-14	54.3007	NCKAP1;GMFB;AHCYL1;SPARC;TRRAP;NEXMIF;KLHDC7A;IKZF2;NUDT5;RNF114;CHORDC1;GLUL;CALN1;MEF2A;PAQR8;UNC13C;SAP30BP;OXSM;PHKA1;MMD2;SOX11;ASRGL1;ATG12;UHMK1;MOSMO;STX1B;SNHG14;MARF1;PPP1R3C;XRN1;PAPPA;XRN2;TMEM126B;ZFPM2;RIN2;SMIM3;MTMR1;LXN;ANAPC15;MEAF6;SDC4;MAGED1;LYPD1;PLA2G6;STXBP5;MAP4;RIMKLB;ARGLU1;GSTM3;CREBBP;GSTM1;HOMER1;NEBL;EDEM1;INTS2;IQSEC3;PRRC2C;IRF2BP2;HSPA12A;PUM1;PRDX6;MED13L;FOSL2;…
Probable Neuron-Enriched Genes PMID18171944	HDSigDB 2021	DiestVMaleAccent1 (Diestrus vs Male, female high/KO upreg, male low/KO downreg)	186	1963	5.35812e-13	1.95866	4.47089e-14	60.2065	DGKG;RAB3C;RIPOR1;DGKD;UBXN2B;UBE3C;GDA;NEXMIF;ARAF;SLA;KANTR;CCNC;DCAF6;RIMS1;RIMS4;DPYSL5;DPYSL3;LUC7L;PLS3;PLXNC1;RGS8;PPFIA4;FAM81A;MAP3K5;CALN1;NSF;PRKAB2;CDKL4;MEF2C;EIF1AX;LMO3;IPCEF1;HPCAL4;LZTFL1;MTURN;AR;STX1B;SNHG14;ARMCX2;RUFY3;EEF1A2;SMS;TBC1D24;UBE2V2;XPR1;ATP6V1A;NECAB1;MEAF6;MAX;PDE1A;MYCBP2;ANKRD12;LYPD1;GMPS;MTMR9;NEDD4L;UBFD1;LIN7A;PDS5B;MTMR4;SMIM7;DNAJC27;PLCXD2;CPLX3;GOLGA7B…
Probable Neuron-Enriched Genes PMID18171944	HDSigDB 2021	Union of DiestVMaleAccent3 and EstVMaleAccent3 (female low/KO downreg, male high/KO upreg)	186	1963	5.35812e-13	1.95866	4.47089e-14	60.2065	DGKG;RAB3C;RIPOR1;DGKD;UBXN2B;UBE3C;GDA;NEXMIF;ARAF;SLA;KANTR;CCNC;DCAF6;RIMS1;RIMS4;DPYSL5;DPYSL3;LUC7L;PLS3;PLXNC1;RGS8;PPFIA4;FAM81A;MAP3K5;CALN1;NSF;PRKAB2;CDKL4;MEF2C;EIF1AX;LMO3;IPCEF1;HPCAL4;LZTFL1;MTURN;AR;STX1B;SNHG14;ARMCX2;RUFY3;EEF1A2;SMS;TBC1D24;UBE2V2;XPR1;ATP6V1A;NECAB1;MEAF6;MAX;PDE1A;MYCBP2;ANKRD12;LYPD1;GMPS;MTMR9;NEDD4L;UBFD1;LIN7A;PDS5B;MTMR4;SMIM7;DNAJC27;PLCXD2;CPLX3;GOLGA7B…
Genes Up-Regulated In Expression In Friedreich Ataxia iPSCs-derived Neurons Vs iPSCs GSE65399	HDSigDB 2021	DiestVMaleAccent1 (Diestrus vs Male, female high/KO upreg, male low/KO downreg)	238	2720	5.3596e-13	1.82414	4.4953e-14	56.0616	CYFIP2;NCKAP1;SPARC;NEXMIF;ABAT;MSANTD4;ACTB;RPS6KA3;SCP2;ZMIZ1;PLCE1;PKNOX2;MEF2C;ANK2;SOX11;HPCAL4;MTURN;MARF1;WDR82;RUFY3;PAPPA;KCTD12;ATF6;RIN2;MEAF6;MAGED1;PDE1A;MYCBP2;LYPD1;NEDD4L;TMTC1;PIK3R1;MTMR4;SULT1A1;EPB41L5;MAP2;MAP4;SRPK2;GSTM3;CREBBP;FZD3;IRF2BP2;HSPA12A;GNG12;DCLK1;ST18;AGO1;FXYD6;MAGED2;RGL1;CPEB2;PAM;CPEB4;PYGB;TOP2B;CSRNP3;BTG1;CDKN1B;NRSN1;CITED2;TGFB1I1;FMN2;ZCCHC18;LYST;SH…
Genes Up-Regulated In Expression In Friedreich Ataxia iPSCs-derived Neurons Vs iPSCs GSE65399	HDSigDB 2021	Union of DiestVMaleAccent3 and EstVMaleAccent3 (female low/KO downreg, male high/KO upreg)	238	2720	5.3596e-13	1.82414	4.4953e-14	56.0616	CYFIP2;NCKAP1;SPARC;NEXMIF;ABAT;MSANTD4;ACTB;RPS6KA3;SCP2;ZMIZ1;PLCE1;PKNOX2;MEF2C;ANK2;SOX11;HPCAL4;MTURN;MARF1;WDR82;RUFY3;PAPPA;KCTD12;ATF6;RIN2;MEAF6;MAGED1;PDE1A;MYCBP2;LYPD1;NEDD4L;TMTC1;PIK3R1;MTMR4;SULT1A1;EPB41L5;MAP2;MAP4;SRPK2;GSTM3;CREBBP;FZD3;IRF2BP2;HSPA12A;GNG12;DCLK1;ST18;AGO1;FXYD6;MAGED2;RGL1;CPEB2;PAM;CPEB4;PYGB;TOP2B;CSRNP3;BTG1;CDKN1B;NRSN1;CITED2;TGFB1I1;FMN2;ZCCHC18;LYST;SH…
Genes Up-Regulated In HD iPSCs After 130 D Of Differentiation GSE109534	HDSigDB 2021	DiestVMaleAccent1 (Diestrus vs Male, female high/KO upreg, male low/KO downreg)	309	3808	5.46975e-13	1.71716	4.61133e-14	52.7299	TRIO;NEXMIF;IPP;ABAT;MSANTD4;DCAF6;SYNGAP1;PEG13;DPYSL5;ZMIZ1;PLCE1;SOX6;PKNOX2;SOX5;MEF2A;MEF2C;OXSM;RFX3;MMD2;ANK2;SOX11;HPCAL4;RC3H2;THAP2;MTURN;STX1B;MARF1;XRN1;WDR82;RUFY3;HECA;ZFPM2;RIN2;MTMR1;MEAF6;MAGED1;PDE1A;CEP85L;MYCBP2;LYPD1;AGAP2;NEDD4L;PIK3R1;MTMR4;NYAP2;TTBK2;MAP2;SRPK2;GSTM3;TIPARP;IQSEC3;IRF2BP2;RAB27B;BBIP1;HSPA12A;PHC3;TMEM196;DCLK1;ST18;MED13L;FOSL2;POU6F1;FAM135B;AGO3;AGO4;M…
Genes Up-Regulated In HD iPSCs After 130 D Of Differentiation GSE109534	HDSigDB 2021	Union of DiestVMaleAccent3 and EstVMaleAccent3 (female low/KO downreg, male high/KO upreg)	309	3808	5.46975e-13	1.71716	4.61133e-14	52.7299	TRIO;NEXMIF;IPP;ABAT;MSANTD4;DCAF6;SYNGAP1;PEG13;DPYSL5;ZMIZ1;PLCE1;SOX6;PKNOX2;SOX5;MEF2A;MEF2C;OXSM;RFX3;MMD2;ANK2;SOX11;HPCAL4;RC3H2;THAP2;MTURN;STX1B;MARF1;XRN1;WDR82;RUFY3;HECA;ZFPM2;RIN2;MTMR1;MEAF6;MAGED1;PDE1A;CEP85L;MYCBP2;LYPD1;AGAP2;NEDD4L;PIK3R1;MTMR4;NYAP2;TTBK2;MAP2;SRPK2;GSTM3;TIPARP;IQSEC3;IRF2BP2;RAB27B;BBIP1;HSPA12A;PHC3;TMEM196;DCLK1;ST18;MED13L;FOSL2;POU6F1;FAM135B;AGO3;AGO4;M…
Genes Up-Regulated In Mural Cells Of HD Patients Vs Control PMID32681824	HDSigDB 2021	DiestVMaleAccent1 (Diestrus vs Male, female high/KO upreg, male low/KO downreg)	71	492	9.36318e-13	3.02548	7.93421e-14	91.2636	ALDH1L1;THRB;PHF20;USP32;ARHGAP5;ARHGAP35;PITPNC1;YY1;DOCK10;XPO1;ZMIZ1;CHORDC1;ARIH1;TEAD1;GLUL;PKNOX2;VAV3;ZCCHC24;NCOA2;CAMK1D;TSC22D3;MAGI2;DYRK1A;RFX3;ASH1L;BCR;TANC1;SETBP1;TBL1XR1;SIK3;PKP4;RIN2;MCPH1;INO80D;KMT2C;PDE1A;PRICKLE2;TMTC1;PDS5B;FOXO3;NDRG2;PDS5A;UBR5;CLASP1;SASH1;SRPK2;CREBBP;UBE2H;DTNA;IRF2BP2;PRRC2C;SORBS1;KLHL24;ARHGAP26;ST18;DHRS3;FOSL2;MIB1;MKLN1;ARHGAP32;PEX5L;DLG2;FMNL2…
Genes Up-Regulated In Mural Cells Of HD Patients Vs Control PMID32681824	HDSigDB 2021	Union of DiestVMaleAccent3 and EstVMaleAccent3 (female low/KO downreg, male high/KO upreg)	71	492	9.36318e-13	3.02548	7.93421e-14	91.2636	ALDH1L1;THRB;PHF20;USP32;ARHGAP5;ARHGAP35;PITPNC1;YY1;DOCK10;XPO1;ZMIZ1;CHORDC1;ARIH1;TEAD1;GLUL;PKNOX2;VAV3;ZCCHC24;NCOA2;CAMK1D;TSC22D3;MAGI2;DYRK1A;RFX3;ASH1L;BCR;TANC1;SETBP1;TBL1XR1;SIK3;PKP4;RIN2;MCPH1;INO80D;KMT2C;PDE1A;PRICKLE2;TMTC1;PDS5B;FOXO3;NDRG2;PDS5A;UBR5;CLASP1;SASH1;SRPK2;CREBBP;UBE2H;DTNA;IRF2BP2;PRRC2C;SORBS1;KLHL24;ARHGAP26;ST18;DHRS3;FOSL2;MIB1;MKLN1;ARHGAP32;PEX5L;DLG2;FMNL2…
Genes Down-Regulated In Expression In Quadriceps Muscle Of HSALR 20B Myotonic Dystrophy Mice (MOE430B Array) GSE14691	HDSigDB 2021	DiestVMaleAccent1 (Diestrus vs Male, female high/KO upreg, male low/KO downreg)	48	258	9.60443e-13	4.05676	8.18017e-14	122.248	AHCTF1;MAOB;NUFIP2;STXBP4;RNMT;CAMK2A;NEDD4L;TMTC1;RSF1;PDS5B;RASAL2;METTL11B;CHD1;CDC73;PPM1F;ZBTB41;BTAF1;FAM168A;BTBD3;PPFIA1;IDS;STXBP5;RICTOR;TPPP;ARID2;PRKAB2;HOMER1;EIF1AX;STRBP;VPS33A;TSC22D2;PCGF3;VPS13D;SORBS2;TMEM64;ASRGL1;PGM2L1;KCTD6;MIB1;PHF20L1;PDP1;MKLN1;DIAPH2;UBE2V2;UBE2N;HECA;PLCD4;JCAD
Genes Down-Regulated In Expression In Quadriceps Muscle Of HSALR 20B Myotonic Dystrophy Mice (MOE430B Array) GSE14691	HDSigDB 2021	Union of DiestVMaleAccent3 and EstVMaleAccent3 (female low/KO downreg, male high/KO upreg)	48	258	9.60443e-13	4.05676	8.18017e-14	122.248	AHCTF1;MAOB;NUFIP2;STXBP4;RNMT;CAMK2A;NEDD4L;TMTC1;RSF1;PDS5B;RASAL2;METTL11B;CHD1;CDC73;PPM1F;ZBTB41;BTAF1;FAM168A;BTBD3;PPFIA1;IDS;STXBP5;RICTOR;TPPP;ARID2;PRKAB2;HOMER1;EIF1AX;STRBP;VPS33A;TSC22D2;PCGF3;VPS13D;SORBS2;TMEM64;ASRGL1;PGM2L1;KCTD6;MIB1;PHF20L1;PDP1;MKLN1;DIAPH2;UBE2V2;UBE2N;HECA;PLCD4;JCAD
Expression In Forebrain Of 11 Wk SCA1 Spinocerebellar Ataxia 1 Mice GSE2867	HDSigDB 2021	DiestVMaleAccent1 (Diestrus vs Male, female high/KO upreg, male low/KO downreg)	59	367	1.15642e-12	3.41772	9.8993e-14	102.339	CYFIP2;RAB3C;GMFB;FMR1;LRRK2;PTEN;ARHGAP5;PITPNC1;SYNE1;SPRED1;TRIM2;PHACTR1;PLXNC1;RGS8;GLUL;FAM81A;AGFG1;PCMTD1;MAP3K5;MED1;CAMK1D;CDADC1;DIO2;ZFP91;ASH1L;UHMK1;BCR;TANC1;CREB1;GPD1;SREK1;MGLL;XPR1;KDM7A;RAPGEF4;STAU2;ROCK2;PDE1A;CAMK2A;SLC1A2;PURB;MAPK8;MAP2;FUT9;RIMKLB;SRPK2;EGR2;HOMER1;GAD1;KCNIP3;GNG12;BAIAP2;DCLK1;TTC39B;MARCKS;APC;CAMK4;AGO2;THRSP
Expression In Forebrain Of 11 Wk SCA1 Spinocerebellar Ataxia 1 Mice GSE2867	HDSigDB 2021	Union of DiestVMaleAccent3 and EstVMaleAccent3 (female low/KO downreg, male high/KO upreg)	59	367	1.15642e-12	3.41772	9.8993e-14	102.339	CYFIP2;RAB3C;GMFB;FMR1;LRRK2;PTEN;ARHGAP5;PITPNC1;SYNE1;SPRED1;TRIM2;PHACTR1;PLXNC1;RGS8;GLUL;FAM81A;AGFG1;PCMTD1;MAP3K5;MED1;CAMK1D;CDADC1;DIO2;ZFP91;ASH1L;UHMK1;BCR;TANC1;CREB1;GPD1;SREK1;MGLL;XPR1;KDM7A;RAPGEF4;STAU2;ROCK2;PDE1A;CAMK2A;SLC1A2;PURB;MAPK8;MAP2;FUT9;RIMKLB;SRPK2;EGR2;HOMER1;GAD1;KCNIP3;GNG12;BAIAP2;DCLK1;TTC39B;MARCKS;APC;CAMK4;AGO2;THRSP
Genes Down-Regulated In HD Grade 3 Markers In Human Caudate Nucleus (HG-U133B) GSE3790	HDSigDB 2021	DiestVMaleAccent1 (Diestrus vs Male, female high/KO upreg, male low/KO downreg)	77	561	1.16926e-12	2.861	1.00598e-13	85.6228	NRSN1;CSRNP3;FRMPD4;GDA;NEXMIF;CELF5;PPP1R9A;ELAVL1;SYNE1;RIMS1;RIMS4;SPRED1;SYNGAP1;ATCAY;DPYSL5;PPP4R4;NCS1;KIF5A;IDS;PHACTR1;RGS8;CALN1;CAMK1D;SGIP1;DIO2;VPS13A;KSR2;FAM126B;PGM2L1;BCR;PHF20L1;CNKSR2;STX1B;GFOD1;LRRC7;NME7;TBL1XR1;DOK6;BCAT1;B4GALT6;SHANK2;NAPB;AMER3;AGAP2;NEDD4L;TMTC1;AKAP5;PLCXD2;ADD2;MAP2;SNTG1;GNG7;REPS2;MAP4;LRRC4C;RAB6B;ARGLU1;LONRF2;RAB11FIP4;SCAI;HOMER1;RASL10B;HUWE1;R…
Genes Down-Regulated In HD Grade 3 Markers In Human Caudate Nucleus (HG-U133B) GSE3790	HDSigDB 2021	Union of DiestVMaleAccent3 and EstVMaleAccent3 (female low/KO downreg, male high/KO upreg)	77	561	1.16926e-12	2.861	1.00598e-13	85.6228	NRSN1;CSRNP3;FRMPD4;GDA;NEXMIF;CELF5;PPP1R9A;ELAVL1;SYNE1;RIMS1;RIMS4;SPRED1;SYNGAP1;ATCAY;DPYSL5;PPP4R4;NCS1;KIF5A;IDS;PHACTR1;RGS8;CALN1;CAMK1D;SGIP1;DIO2;VPS13A;KSR2;FAM126B;PGM2L1;BCR;PHF20L1;CNKSR2;STX1B;GFOD1;LRRC7;NME7;TBL1XR1;DOK6;BCAT1;B4GALT6;SHANK2;NAPB;AMER3;AGAP2;NEDD4L;TMTC1;AKAP5;PLCXD2;ADD2;MAP2;SNTG1;GNG7;REPS2;MAP4;LRRC4C;RAB6B;ARGLU1;LONRF2;RAB11FIP4;SCAI;HOMER1;RASL10B;HUWE1;R…
Genes Changed In The Striatum Of zQ175 Neo- Mice Vs WT GSE123657	HDSigDB 2021	DiestVMaleAccent1 (Diestrus vs Male, female high/KO upreg, male low/KO downreg)	301	3709	1.33682e-12	1.71024	1.15592e-13	50.9458	CYFIP2;CYFIP1;NCKAP1;AHCYL1;MTRR;NEXMIF;IPP;IKZF2;ALKBH8;UBE2L3;PREX2;SYNGAP1;DPYSL5;PPP4R4;DPYSL3;GLUL;CALN1;PRKAB2;PRKCI;FRS2;MMD2;SOX11;HPCAL4;ASRGL1;ATG12;UHMK1;BCR;AR;SNHG14;PPP1R3C;RUFY3;SIK3;TMEM126B;ATF6;NECAB1;LXN;MAGED1;MYCBP2;DCUN1D1;AGAP2;NOLC1;NEDD4L;TMTC1;PIK3R1;NYAP2;IQGAP2;SMIM7;GIGYF2;MAP2;PRKAR2A;DPH3;STXBP5;ARGLU1;CREBBP;EGR2;GSTM1;EGR3;HOMER1;TIPARP;EDEM1;INTS2;EXOC6B;PRRC2C;I…
Genes Changed In The Striatum Of zQ175 Neo- Mice Vs WT GSE123657	HDSigDB 2021	Union of DiestVMaleAccent3 and EstVMaleAccent3 (female low/KO downreg, male high/KO upreg)	301	3709	1.33682e-12	1.71024	1.15592e-13	50.9458	CYFIP2;CYFIP1;NCKAP1;AHCYL1;MTRR;NEXMIF;IPP;IKZF2;ALKBH8;UBE2L3;PREX2;SYNGAP1;DPYSL5;PPP4R4;DPYSL3;GLUL;CALN1;PRKAB2;PRKCI;FRS2;MMD2;SOX11;HPCAL4;ASRGL1;ATG12;UHMK1;BCR;AR;SNHG14;PPP1R3C;RUFY3;SIK3;TMEM126B;ATF6;NECAB1;LXN;MAGED1;MYCBP2;DCUN1D1;AGAP2;NOLC1;NEDD4L;TMTC1;PIK3R1;NYAP2;IQGAP2;SMIM7;GIGYF2;MAP2;PRKAR2A;DPH3;STXBP5;ARGLU1;CREBBP;EGR2;GSTM1;EGR3;HOMER1;TIPARP;EDEM1;INTS2;EXOC6B;PRRC2C;I…
ATF4 KO HEK293 HUMAN GSE97384 RNASEQ DOWN	Lit Mined TF Perturbation Signatures	DiestVMaleAccent1 (Diestrus vs Male, female high/KO upreg, male low/KO downreg)	67	423	1.38247e-12	3.37508	4.25157e-15	111.686	NCKAP1;PANK3;TRRAP;CSE1L;FMR1;CLTC;SETD7;USP34;MTR;EPRS;ARHGAP5;IPO7;IPO5;AMOT;NARS;MED13;NHSL1;XPO1;KPNA6;PPFIA1;PLS3;TNPO1;TEAD1;GLUL;WARS;EIF1AX;VPS13C;TSC22D3;CKAP5;ILF3;XRN2;LCOR;KCTD12;BCAT1;SET;KMT2A;RNMT;USO1;CEBPG;NOLC1;PDS5A;BCLAF1;LARP1;BTAF1;POLR2B;CBS;RAD21;UBR5;MAP4;EIF4B;PCK2;FEM1B;HUWE1;NUP153;HELZ;NOC3L;EEF2;PUM1;USF3;MED13L;MIB1;CNOT1;RLIM;ANP32E;TRIP12;EIF4G2;TRIM33
ATF4 KO HEK293 HUMAN GSE97384 RNASEQ DOWN	Lit Mined TF Perturbation Signatures	EstVMaleAccent1 (Estrus vs Male, female high/KO upreg, male low/KO downreg)	67	423	1.38247e-12	3.37508	4.25157e-15	111.686	NCKAP1;PANK3;TRRAP;CSE1L;FMR1;CLTC;SETD7;USP34;MTR;EPRS;ARHGAP5;IPO7;IPO5;AMOT;NARS;MED13;NHSL1;XPO1;KPNA6;PPFIA1;PLS3;TNPO1;TEAD1;GLUL;WARS;EIF1AX;VPS13C;TSC22D3;CKAP5;ILF3;XRN2;LCOR;KCTD12;BCAT1;SET;KMT2A;RNMT;USO1;CEBPG;NOLC1;PDS5A;BCLAF1;LARP1;BTAF1;POLR2B;CBS;RAD21;UBR5;MAP4;EIF4B;PCK2;FEM1B;HUWE1;NUP153;HELZ;NOC3L;EEF2;PUM1;USF3;MED13L;MIB1;CNOT1;RLIM;ANP32E;TRIP12;EIF4G2;TRIM33
ATF4 KO HEK293 HUMAN GSE97384 RNASEQ DOWN	Lit Mined TF Perturbation Signatures	DiestVMaleAccent3 (Diestrus vs Male, female low/KO downreg, male high/KO upreg)	67	423	1.38247e-12	3.37508	4.25157e-15	111.686	NCKAP1;PANK3;TRRAP;CSE1L;FMR1;CLTC;SETD7;USP34;MTR;EPRS;ARHGAP5;IPO7;IPO5;AMOT;NARS;MED13;NHSL1;XPO1;KPNA6;PPFIA1;PLS3;TNPO1;TEAD1;GLUL;WARS;EIF1AX;VPS13C;TSC22D3;CKAP5;ILF3;XRN2;LCOR;KCTD12;BCAT1;SET;KMT2A;RNMT;USO1;CEBPG;NOLC1;PDS5A;BCLAF1;LARP1;BTAF1;POLR2B;CBS;RAD21;UBR5;MAP4;EIF4B;PCK2;FEM1B;HUWE1;NUP153;HELZ;NOC3L;EEF2;PUM1;USF3;MED13L;MIB1;CNOT1;RLIM;ANP32E;TRIP12;EIF4G2;TRIM33
Differentially Expressed Genes In Cerebellum Of 10 Mon HD Q175 Mice Vs Q20 GSE73468	HDSigDB 2021	DiestVMaleAccent1 (Diestrus vs Male, female high/KO upreg, male low/KO downreg)	301	3711	1.42585e-12	1.70901	1.23907e-13	50.7906	AHCYL1;PANK3;SPARC;FRMPD4;NEXMIF;ABAT;KLHDC7A;DCAF6;RPS6KA3;PPP4R4;GLUL;UNC13C;SAP30BP;MEF2C;PRKCI;MRTFB;FRS2;MMD2;RC3H2;ASRGL1;MTURN;STX1B;PPP1R3C;XRN1;PAPPA;XRN2;ATF7;RELCH;HECA;KCTD12;ZFPM2;CLOCK;MTMR1;NECAB1;SET;SDC4;MAGED1;MYCBP2;NEDD4L;TMTC1;PIK3R1;NYAP2;IQGAP2;LARP1;MAP2;RAD21;DHX36;STXBP5;MAP4;RIMKLB;ARGLU1;RAB11FIP4;SCAI;SRPK2;GSTM1;PHC1;NEBL;IQSEC3;SMARCA5;BBIP1;HSPA12A;GNG12;PRDX6;POU6…
Differentially Expressed Genes In Cerebellum Of 10 Mon HD Q175 Mice Vs Q20 GSE73468	HDSigDB 2021	Union of DiestVMaleAccent3 and EstVMaleAccent3 (female low/KO downreg, male high/KO upreg)	301	3711	1.42585e-12	1.70901	1.23907e-13	50.7906	AHCYL1;PANK3;SPARC;FRMPD4;NEXMIF;ABAT;KLHDC7A;DCAF6;RPS6KA3;PPP4R4;GLUL;UNC13C;SAP30BP;MEF2C;PRKCI;MRTFB;FRS2;MMD2;RC3H2;ASRGL1;MTURN;STX1B;PPP1R3C;XRN1;PAPPA;XRN2;ATF7;RELCH;HECA;KCTD12;ZFPM2;CLOCK;MTMR1;NECAB1;SET;SDC4;MAGED1;MYCBP2;NEDD4L;TMTC1;PIK3R1;NYAP2;IQGAP2;LARP1;MAP2;RAD21;DHX36;STXBP5;MAP4;RIMKLB;ARGLU1;RAB11FIP4;SCAI;SRPK2;GSTM1;PHC1;NEBL;IQSEC3;SMARCA5;BBIP1;HSPA12A;GNG12;PRDX6;POU6…
Genes Down-Regulated In Influence Of Hdac4 Reduction On Expression In 15 Wk WT Mice GSE38219	HDSigDB 2021	DiestVMaleAccent1 (Diestrus vs Male, female high/KO upreg, male low/KO downreg)	179	1886	1.47835e-12	1.95531	1.29108e-13	58.0299	OTUD4;CCDC71L;CHIC1;UBXN2B;WIPF2;ARAF;IPP;RORB;FGF1;RGS5;RIMS1;SLK;RNF114;SCP2;GNPTAB;PLXNC1;CIAO2A;KPNA3;GLUL;KPNA1;AGFG1;PAQR8;PRKAB2;MEF2C;EIF1AX;MMGT1;RALGAPA1;VPS33A;OXSM;TMOD2;MAGI2;DYRK1A;TUG1;LZTFL1;RNF41;DCTD;STX1B;ILF3;PPP1R3C;GPD1;XRN2;SELENOP;SMS;SUCLG2;ANKRD40;RELCH;TMEM126B;TBC1D23;ANAPC1;XPR1;LRRC58;SMIM3;MTMR1;SET;MAX;ANKRD12;DCUN1D1;CAMSAP2;RAD21;ZKSCAN8;G3BP2;NDP;RIMKLB;ZKSCAN1;…
Genes Down-Regulated In Influence Of Hdac4 Reduction On Expression In 15 Wk WT Mice GSE38219	HDSigDB 2021	Union of DiestVMaleAccent3 and EstVMaleAccent3 (female low/KO downreg, male high/KO upreg)	179	1886	1.47835e-12	1.95531	1.29108e-13	58.0299	OTUD4;CCDC71L;CHIC1;UBXN2B;WIPF2;ARAF;IPP;RORB;FGF1;RGS5;RIMS1;SLK;RNF114;SCP2;GNPTAB;PLXNC1;CIAO2A;KPNA3;GLUL;KPNA1;AGFG1;PAQR8;PRKAB2;MEF2C;EIF1AX;MMGT1;RALGAPA1;VPS33A;OXSM;TMOD2;MAGI2;DYRK1A;TUG1;LZTFL1;RNF41;DCTD;STX1B;ILF3;PPP1R3C;GPD1;XRN2;SELENOP;SMS;SUCLG2;ANKRD40;RELCH;TMEM126B;TBC1D23;ANAPC1;XPR1;LRRC58;SMIM3;MTMR1;SET;MAX;ANKRD12;DCUN1D1;CAMSAP2;RAD21;ZKSCAN8;G3BP2;NDP;RIMKLB;ZKSCAN1;…
TCF3 KO MOUSE GSE19923 CREEDSID GENE 2167 UP	Lit Mined TF Perturbation Signatures	DiestVMaleAccent1 (Diestrus vs Male, female high/KO upreg, male low/KO downreg)	53	287	1.571e-12	4.03391	5.63659e-15	132.351	TOP2B;KDM5B;GSK3B;SETD2;GMFB;LYST;PCMTD2;DOCK10;NIPBL;XPO1;GPBP1;EP300;KPNA4;ARID2;KDM6A;MED1;ZYG11B;ZFR;MSL2;TUG1;PIK3CA;XIST;BHLHB9;ROCK1;BAZ2A;PDS5A;BCLAF1;BTAF1;RMND5A;DHX36;GPBP1L1;TENT2;RANBP2;ATF7IP;HSPA8;CREBBP;UBE2H;CPSF6;MGA;PRRC2C;NUP153;KLHL24;PUM1;GATAD2B;PUM2;MARCKS;PAN3;CNOT1;CAMK4;NEDD4;TAOK1;ANP32E;EIF3A
TCF3 KO MOUSE GSE19923 CREEDSID GENE 2167 UP	Lit Mined TF Perturbation Signatures	EstVMaleAccent1 (Estrus vs Male, female high/KO upreg, male low/KO downreg)	53	287	1.571e-12	4.03391	5.63659e-15	132.351	TOP2B;KDM5B;GSK3B;SETD2;GMFB;LYST;PCMTD2;DOCK10;NIPBL;XPO1;GPBP1;EP300;KPNA4;ARID2;KDM6A;MED1;ZYG11B;ZFR;MSL2;TUG1;PIK3CA;XIST;BHLHB9;ROCK1;BAZ2A;PDS5A;BCLAF1;BTAF1;RMND5A;DHX36;GPBP1L1;TENT2;RANBP2;ATF7IP;HSPA8;CREBBP;UBE2H;CPSF6;MGA;PRRC2C;NUP153;KLHL24;PUM1;GATAD2B;PUM2;MARCKS;PAN3;CNOT1;CAMK4;NEDD4;TAOK1;ANP32E;EIF3A
TCF3 KO MOUSE GSE19923 CREEDSID GENE 2167 UP	Lit Mined TF Perturbation Signatures	DiestVMaleAccent3 (Diestrus vs Male, female low/KO downreg, male high/KO upreg)	53	287	1.571e-12	4.03391	5.63659e-15	132.351	TOP2B;KDM5B;GSK3B;SETD2;GMFB;LYST;PCMTD2;DOCK10;NIPBL;XPO1;GPBP1;EP300;KPNA4;ARID2;KDM6A;MED1;ZYG11B;ZFR;MSL2;TUG1;PIK3CA;XIST;BHLHB9;ROCK1;BAZ2A;PDS5A;BCLAF1;BTAF1;RMND5A;DHX36;GPBP1L1;TENT2;RANBP2;ATF7IP;HSPA8;CREBBP;UBE2H;CPSF6;MGA;PRRC2C;NUP153;KLHL24;PUM1;GATAD2B;PUM2;MARCKS;PAN3;CNOT1;CAMK4;NEDD4;TAOK1;ANP32E;EIF3A
HD Grade 2 Markers In Human Caudate Nucleus (HG-U133A) GSE3790	HDSigDB 2021	DiestVMaleAccent1 (Diestrus vs Male, female high/KO upreg, male low/KO downreg)	152	1517	2.03397e-12	2.05743	1.78511e-13	60.3941	CYFIP2;ALDH1L1;AHCYL1;SPARC;PLEKHB2;DGKB;NAB1;FAM107A;OGDHL;FGF1;ACTB;DCAF6;PAIP2B;SLK;RNF114;GNPTAB;PPP2R1A;DPYSL3;KIF5A;PPFIA1;PLCE1;PPFIA4;SOX5;PPP1R16B;NSF;SAP30BP;LMO3;MRTFB;IPCEF1;HPCAL4;RNF41;BCR;TYROBP;ARMCX2;RUFY3;EEF1A2;SELENOP;PKP4;RIN2;JCAD;ATP6V1A;SHC3;SDC4;MAOB;MAX;AGAP2;NEDD4L;SNTG1;MAP2;ZMAT4;TASOR;G3BP2;MAP4;RAB6B;MCL1;RAP1GAP2;TCAF1;EGR3;DTNA;HOMER1;NEBL;CEP350;HSPA2;HSPA12A;GNG…
HD Grade 2 Markers In Human Caudate Nucleus (HG-U133A) GSE3790	HDSigDB 2021	Union of DiestVMaleAccent3 and EstVMaleAccent3 (female low/KO downreg, male high/KO upreg)	152	1517	2.03397e-12	2.05743	1.78511e-13	60.3941	CYFIP2;ALDH1L1;AHCYL1;SPARC;PLEKHB2;DGKB;NAB1;FAM107A;OGDHL;FGF1;ACTB;DCAF6;PAIP2B;SLK;RNF114;GNPTAB;PPP2R1A;DPYSL3;KIF5A;PPFIA1;PLCE1;PPFIA4;SOX5;PPP1R16B;NSF;SAP30BP;LMO3;MRTFB;IPCEF1;HPCAL4;RNF41;BCR;TYROBP;ARMCX2;RUFY3;EEF1A2;SELENOP;PKP4;RIN2;JCAD;ATP6V1A;SHC3;SDC4;MAOB;MAX;AGAP2;NEDD4L;SNTG1;MAP2;ZMAT4;TASOR;G3BP2;MAP4;RAB6B;MCL1;RAP1GAP2;TCAF1;EGR3;DTNA;HOMER1;NEBL;CEP350;HSPA2;HSPA12A;GNG…
Genes Down-Regulated In HD Markers In Human Caudate Nucleus (HG-U133A) E-AFMX-6	HDSigDB 2021	DiestVMaleAccent1 (Diestrus vs Male, female high/KO upreg, male low/KO downreg)	54	323	2.51895e-12	3.57197	2.22164e-13	104.071	CSRNP3;NRSN1;FRMPD4;NEXMIF;CELF5;SYNE1;RIMS1;PPP4R4;NCS1;KIF5A;RGS8;CALN1;MKKS;CAMK1D;SGIP1;DIO2;VPS13A;KSR2;FAM126B;PGM2L1;CNKSR2;PHF20L1;LRRC7;DOK6;B4GALT6;BCAT1;JCAD;SHANK2;NECAB1;AGAP2;NEDD4L;AKAP5;PLCXD2;MAP2;CAMK2N1;GNG7;REPS2;MAP4;LRRC4C;ARGLU1;LONRF2;SCAI;HOMER1;SORBS2;ARHGAP26;TMEM196;SVIP;HS3ST4;DCLK1;PDP1;ARHGAP32;NBEA;CAMK4;SSBP2
Genes Down-Regulated In HD Markers In Human Caudate Nucleus (HG-U133A) E-AFMX-6	HDSigDB 2021	Union of DiestVMaleAccent3 and EstVMaleAccent3 (female low/KO downreg, male high/KO upreg)	54	323	2.51895e-12	3.57197	2.22164e-13	104.071	CSRNP3;NRSN1;FRMPD4;NEXMIF;CELF5;SYNE1;RIMS1;PPP4R4;NCS1;KIF5A;RGS8;CALN1;MKKS;CAMK1D;SGIP1;DIO2;VPS13A;KSR2;FAM126B;PGM2L1;CNKSR2;PHF20L1;LRRC7;DOK6;B4GALT6;BCAT1;JCAD;SHANK2;NECAB1;AGAP2;NEDD4L;AKAP5;PLCXD2;MAP2;CAMK2N1;GNG7;REPS2;MAP4;LRRC4C;ARGLU1;LONRF2;SCAI;HOMER1;SORBS2;ARHGAP26;TMEM196;SVIP;HS3ST4;DCLK1;PDP1;ARHGAP32;NBEA;CAMK4;SSBP2
Genes Up-Regulated In Expression In The Heart Of Mice Inducibly Expressing Celf1 For 72 H GSE56185	HDSigDB 2021	DiestVMaleAccent1 (Diestrus vs Male, female high/KO upreg, male low/KO downreg)	139	1347	2.79685e-12	2.11605	2.47883e-13	61.42	ANKRD13C;PANK3;FMR1;UBE3A;KLHDC7A;IPO7;ALKBH8;GPBP1;CHORDC1;NFATC2IP;LUC7L;PLS3;KPNA4;MED1;SAP30BP;PRKCI;EIF1AX;FRS2;RC3H2;ATG12;XRN2;UBE2V2;TCEANC2;ATF7;CLOCK;ATP6V1A;INO80D;KMT2A;ABHD4;MAX;KMT2C;ANKRD12;GMPS;DCUN1D1;UBFD1;TTBK2;CPLX3;ZKSCAN8;ZKSCAN5;ZKSCAN1;EGR2;FZD3;ACBD5;EGR3;CPSF6;PHF10;EDEM1;INTS2;SMARCA5;PRRC2C;NUP153;PHC3;AZIN1;CNOT4;CCDC88A;PAN3;AGO3;APPBP2;DMXL1;GNAQ;MDM4;CDK12;CPEB4;PH…
Genes Up-Regulated In Expression In The Heart Of Mice Inducibly Expressing Celf1 For 72 H GSE56185	HDSigDB 2021	Union of DiestVMaleAccent3 and EstVMaleAccent3 (female low/KO downreg, male high/KO upreg)	139	1347	2.79685e-12	2.11605	2.47883e-13	61.42	ANKRD13C;PANK3;FMR1;UBE3A;KLHDC7A;IPO7;ALKBH8;GPBP1;CHORDC1;NFATC2IP;LUC7L;PLS3;KPNA4;MED1;SAP30BP;PRKCI;EIF1AX;FRS2;RC3H2;ATG12;XRN2;UBE2V2;TCEANC2;ATF7;CLOCK;ATP6V1A;INO80D;KMT2A;ABHD4;MAX;KMT2C;ANKRD12;GMPS;DCUN1D1;UBFD1;TTBK2;CPLX3;ZKSCAN8;ZKSCAN5;ZKSCAN1;EGR2;FZD3;ACBD5;EGR3;CPSF6;PHF10;EDEM1;INTS2;SMARCA5;PRRC2C;NUP153;PHC3;AZIN1;CNOT4;CCDC88A;PAN3;AGO3;APPBP2;DMXL1;GNAQ;MDM4;CDK12;CPEB4;PH…
Genes Down-Regulated In The Astrocytes Of zQ175 KI Mice Vs WT At 6 Month Old GSE124846	HDSigDB 2021	DiestVMaleAccent1 (Diestrus vs Male, female high/KO upreg, male low/KO downreg)	92	748	3.14959e-12	2.53565	2.80509e-13	73.2858	CYFIP2;NCKAP1;GSK3B;UBXN2B;FRMPD4;DGKB;LRRK2;PPP1R9A;LYST;SYNE1;RIMS1;SPRED1;SYNGAP1;SLK;PPP4R4;SCRN3;PSD3;PHACTR1;RGS8;PCMTD1;CALN1;PPP1R16B;UNC13C;PRKCI;LYNX1;CAMK1D;USP45;KCNAB2;KSR2;HPCAL4;PJA2;BCR;CNKSR2;ARHGEF9;GFOD1;LRRC7;PXDN;GPD1;ALDH1A1;ATF6;JCAD;KDM7A;GAS7;NECAB1;PDXK;CAMK2A;AGAP2;NEDD4L;HTT;AKAP5;IQGAP2;ADD2;ATXN1;ACVR1C;RMND5A;CAMK2N1;FUT9;GNG7;REPS2;RAB6B;SKIL;TRIM44;MAPK4;RAP1GAP2;…
Genes Down-Regulated In The Astrocytes Of zQ175 KI Mice Vs WT At 6 Month Old GSE124846	HDSigDB 2021	Union of DiestVMaleAccent3 and EstVMaleAccent3 (female low/KO downreg, male high/KO upreg)	92	748	3.14959e-12	2.53565	2.80509e-13	73.2858	CYFIP2;NCKAP1;GSK3B;UBXN2B;FRMPD4;DGKB;LRRK2;PPP1R9A;LYST;SYNE1;RIMS1;SPRED1;SYNGAP1;SLK;PPP4R4;SCRN3;PSD3;PHACTR1;RGS8;PCMTD1;CALN1;PPP1R16B;UNC13C;PRKCI;LYNX1;CAMK1D;USP45;KCNAB2;KSR2;HPCAL4;PJA2;BCR;CNKSR2;ARHGEF9;GFOD1;LRRC7;PXDN;GPD1;ALDH1A1;ATF6;JCAD;KDM7A;GAS7;NECAB1;PDXK;CAMK2A;AGAP2;NEDD4L;HTT;AKAP5;IQGAP2;ADD2;ATXN1;ACVR1C;RMND5A;CAMK2N1;FUT9;GNG7;REPS2;RAB6B;SKIL;TRIM44;MAPK4;RAP1GAP2;…
Genes Up-Regulated In Control iPSCs After 130 D Of Differentiation GSE109534	HDSigDB 2021	DiestVMaleAccent1 (Diestrus vs Male, female high/KO upreg, male low/KO downreg)	299	3707	3.5438e-12	1.69464	3.17553e-13	48.7685	CYFIP2;TRIO;FRMPD4;NEXMIF;IPP;ABAT;DPYSL5;ZMIZ1;PLCE1;SOX6;PKNOX2;SOX5;MEF2C;RFX3;MMD2;ANK2;SOX11;HPCAL4;THAP2;MTURN;STX1B;MARF1;XRN1;RUFY3;HECA;ZFPM2;RIN2;MEAF6;MAOB;MAGED1;PDE1A;CEP85L;MYCBP2;LYPD1;AGAP2;NEDD4L;MTMR4;NYAP2;PLA2G6;TTBK2;MAP2;STXBP5;SCAI;GSTM3;DTNA;NEBL;TIPARP;IQSEC3;IRF2BP2;RAB27B;BBIP1;HSPA12A;PHC3;TMEM196;DCLK1;ST18;MED13L;FOSL2;POU6F1;AGO3;AGO4;FXYD6;RGL1;CPEB2;EZH1;CPEB4;PYG…
Up-regulated Genes In Cerebellum Of 10 Mon HD Q175 Mice Vs Q20 GSE73468	HDSigDB 2021	DiestVMaleAccent1 (Diestrus vs Male, female high/KO upreg, male low/KO downreg)	179	1905	3.5438e-12	1.93165	3.18682e-13	55.5823	CCDC71L;DGKD;PANK3;NEXMIF;CTNND2;FMR1;DCAF6;RPS6KA3;SLK;ATCAY;KPNA3;MAP3K5;UNC13C;SAP30BP;MEF2C;PRKCI;EIF1AX;MRTFB;FRS2;IPCEF1;FBXO11;MYT1;RC3H2;MTURN;TYROBP;ARMCX2;XRN1;XRN2;SMS;ANKRD40;RELCH;HECA;ZFPM2;CLOCK;ANAPC1;LRRC58;ATP6V1A;MTMR1;NECAB1;SET;BHLHB9;CUL5;MAGED1;MYCBP2;NEDD4L;PIK3R1;NYAP2;IQGAP2;CAMSAP2;MAP2;RAD21;DHX36;STXBP5;LRRC4C;ARGLU1;LONRF2;ZKSCAN1;SCAI;MCL1;KLHDC10;SRPK2;UBE2H;TCAF1;…
Genes Up-Regulated In Control iPSCs After 130 D Of Differentiation GSE109534	HDSigDB 2021	Union of DiestVMaleAccent3 and EstVMaleAccent3 (female low/KO downreg, male high/KO upreg)	299	3707	3.5438e-12	1.69464	3.17553e-13	48.7685	CYFIP2;TRIO;FRMPD4;NEXMIF;IPP;ABAT;DPYSL5;ZMIZ1;PLCE1;SOX6;PKNOX2;SOX5;MEF2C;RFX3;MMD2;ANK2;SOX11;HPCAL4;THAP2;MTURN;STX1B;MARF1;XRN1;RUFY3;HECA;ZFPM2;RIN2;MEAF6;MAOB;MAGED1;PDE1A;CEP85L;MYCBP2;LYPD1;AGAP2;NEDD4L;MTMR4;NYAP2;PLA2G6;TTBK2;MAP2;STXBP5;SCAI;GSTM3;DTNA;NEBL;TIPARP;IQSEC3;IRF2BP2;RAB27B;BBIP1;HSPA12A;PHC3;TMEM196;DCLK1;ST18;MED13L;FOSL2;POU6F1;AGO3;AGO4;FXYD6;RGL1;CPEB2;EZH1;CPEB4;PYG…
Up-regulated Genes In Cerebellum Of 10 Mon HD Q175 Mice Vs Q20 GSE73468	HDSigDB 2021	Union of DiestVMaleAccent3 and EstVMaleAccent3 (female low/KO downreg, male high/KO upreg)	179	1905	3.5438e-12	1.93165	3.18682e-13	55.5823	CCDC71L;DGKD;PANK3;NEXMIF;CTNND2;FMR1;DCAF6;RPS6KA3;SLK;ATCAY;KPNA3;MAP3K5;UNC13C;SAP30BP;MEF2C;PRKCI;EIF1AX;MRTFB;FRS2;IPCEF1;FBXO11;MYT1;RC3H2;MTURN;TYROBP;ARMCX2;XRN1;XRN2;SMS;ANKRD40;RELCH;HECA;ZFPM2;CLOCK;ANAPC1;LRRC58;ATP6V1A;MTMR1;NECAB1;SET;BHLHB9;CUL5;MAGED1;MYCBP2;NEDD4L;PIK3R1;NYAP2;IQGAP2;CAMSAP2;MAP2;RAD21;DHX36;STXBP5;LRRC4C;ARGLU1;LONRF2;ZKSCAN1;SCAI;MCL1;KLHDC10;SRPK2;UBE2H;TCAF1;…
Genes Down-Regulated In Expression In 12 Wk R6/2 HD Mice (Set1) GSE9803	HDSigDB 2021	DiestVMaleAccent1 (Diestrus vs Male, female high/KO upreg, male low/KO downreg)	173	1822	3.87031e-12	1.95014	3.49716e-13	55.9333	CYFIP2;NCKAP1;ALDH1L1;TRIO;DGKB;CTNND2;ARAF;FAM107A;RORB;RIMS1;RPS6KA3;ZMIZ1;SCMH1;PLXNC1;PPFIA4;GLUL;MAP3K5;CALN1;PPP1R16B;MEF2C;PRKCI;VPS33A;MRTFB;DIO2;MMD2;ANK3;HPCAL4;ASRGL1;BCR;STX1B;PPP1R3C;LIX1;TBL1XR1;GPD1;SIK3;ELMO2;ATF6;JCAD;XPR1;NECAB1;LXN;SHC3;EPAS1;SLC1A2;NEDD4L;LIN7A;IQGAP2;FOXO3;SMIM7;ATXN1;FUT9;ZMAT4;TPPP;MAP4;LRRC4C;SOCS7;SKIL;RAB6B;RAP1GAP2;EGR2;TCAF1;FZD3;GSTM1;EGR3;DTNA;HOMER1…
Genes Down-Regulated In Expression In 12 Wk R6/2 HD Mice (Set1) GSE9803	HDSigDB 2021	Union of DiestVMaleAccent3 and EstVMaleAccent3 (female low/KO downreg, male high/KO upreg)	173	1822	3.87031e-12	1.95014	3.49716e-13	55.9333	CYFIP2;NCKAP1;ALDH1L1;TRIO;DGKB;CTNND2;ARAF;FAM107A;RORB;RIMS1;RPS6KA3;ZMIZ1;SCMH1;PLXNC1;PPFIA4;GLUL;MAP3K5;CALN1;PPP1R16B;MEF2C;PRKCI;VPS33A;MRTFB;DIO2;MMD2;ANK3;HPCAL4;ASRGL1;BCR;STX1B;PPP1R3C;LIX1;TBL1XR1;GPD1;SIK3;ELMO2;ATF6;JCAD;XPR1;NECAB1;LXN;SHC3;EPAS1;SLC1A2;NEDD4L;LIN7A;IQGAP2;FOXO3;SMIM7;ATXN1;FUT9;ZMAT4;TPPP;MAP4;LRRC4C;SOCS7;SKIL;RAB6B;RAP1GAP2;EGR2;TCAF1;FZD3;GSTM1;EGR3;DTNA;HOMER1…
Genes Down-Regulated In HD Grade 3 Markers In Human Caudate Nucleus (HG-U133A) GSE3790	HDSigDB 2021	DiestVMaleAccent1 (Diestrus vs Male, female high/KO upreg, male low/KO downreg)	105	911	3.91578e-12	2.36649	3.55518e-13	67.836	CYFIP2;RIPOR1;PLEKHB2;FRMPD4;DGKB;OGDHL;PRDM2;SLK;GNPTAB;PPP2R1A;KIF5A;PDE8B;PPFIA4;GLUL;PPP1R16B;NSF;LMO3;TMOD2;MRTFB;ANK2;SOX11;IPCEF1;HPCAL4;RNF41;BCR;RUFY3;EEF1A2;SIK3;PKP4;JCAD;ATP6V1A;SHC3;AGAP2;NEDD4L;ATXN1;KIF3B;SNTG1;MAP2;ZMAT4;G3BP2;RAB6B;RAP1GAP2;TCAF1;EGR3;HOMER1;IQSEC3;HSPA12A;DCLK1;ARHGAP33;ARHGAP32;DIAPH2;GNAL;DLG2;NBEA;UBE2N;CDK14;PAM;FGFR3;CSRNP3;LDB2;SIPA1L1;NCS1;PSD3;IDS;PHACTR…
Genes Down-Regulated In HD Grade 3 Markers In Human Caudate Nucleus (HG-U133A) GSE3790	HDSigDB 2021	Union of DiestVMaleAccent3 and EstVMaleAccent3 (female low/KO downreg, male high/KO upreg)	105	911	3.91578e-12	2.36649	3.55518e-13	67.836	CYFIP2;RIPOR1;PLEKHB2;FRMPD4;DGKB;OGDHL;PRDM2;SLK;GNPTAB;PPP2R1A;KIF5A;PDE8B;PPFIA4;GLUL;PPP1R16B;NSF;LMO3;TMOD2;MRTFB;ANK2;SOX11;IPCEF1;HPCAL4;RNF41;BCR;RUFY3;EEF1A2;SIK3;PKP4;JCAD;ATP6V1A;SHC3;AGAP2;NEDD4L;ATXN1;KIF3B;SNTG1;MAP2;ZMAT4;G3BP2;RAB6B;RAP1GAP2;TCAF1;EGR3;HOMER1;IQSEC3;HSPA12A;DCLK1;ARHGAP33;ARHGAP32;DIAPH2;GNAL;DLG2;NBEA;UBE2N;CDK14;PAM;FGFR3;CSRNP3;LDB2;SIPA1L1;NCS1;PSD3;IDS;PHACTR…
Genes Up-Regulated In Expression In The Heart Of Mice Inducibly Expressing Celf1 For 24 H GSE56185	HDSigDB 2021	DiestVMaleAccent1 (Diestrus vs Male, female high/KO upreg, male low/KO downreg)	126	1182	4.23156e-12	2.18358	3.86017e-13	62.4131	GMFB;PANK3;FMR1;CCNC;UBE3A;IPO7;ALKBH8;TATDN1;GPBP1;CHORDC1;PLS3;KPNA4;KPNA3;SAP30BP;PRKCI;EIF1AX;FBXO11;RC3H2;LZTFL1;XRN1;UBE2V2;TMEM126B;SREK1;SET;ANAPC15;ANKRD12;GMPS;DCUN1D1;CREBL2;PIK3R1;STK4;TTBK2;ARHGAP12;FZD3;CPSF6;CBX5;HOMER2;IDH1;KLHL28;SMARCA5;HOOK3;CCDC88A;DIAPH2;LAS1L;AGO3;DMXL1;GNAQ;UBE2N;UBA3;ECHDC1;ANP32E;MDM4;TOP2B;CSRNP3;DDX3X;PTEN;ELAVL4;ARHGAP5;IER3IP1;PPP1R9A;BICD1;CDC73;WDR4…
Genes Up-Regulated In Expression In The Heart Of Mice Inducibly Expressing Celf1 For 24 H GSE56185	HDSigDB 2021	Union of DiestVMaleAccent3 and EstVMaleAccent3 (female low/KO downreg, male high/KO upreg)	126	1182	4.23156e-12	2.18358	3.86017e-13	62.4131	GMFB;PANK3;FMR1;CCNC;UBE3A;IPO7;ALKBH8;TATDN1;GPBP1;CHORDC1;PLS3;KPNA4;KPNA3;SAP30BP;PRKCI;EIF1AX;FBXO11;RC3H2;LZTFL1;XRN1;UBE2V2;TMEM126B;SREK1;SET;ANAPC15;ANKRD12;GMPS;DCUN1D1;CREBL2;PIK3R1;STK4;TTBK2;ARHGAP12;FZD3;CPSF6;CBX5;HOMER2;IDH1;KLHL28;SMARCA5;HOOK3;CCDC88A;DIAPH2;LAS1L;AGO3;DMXL1;GNAQ;UBE2N;UBA3;ECHDC1;ANP32E;MDM4;TOP2B;CSRNP3;DDX3X;PTEN;ELAVL4;ARHGAP5;IER3IP1;PPP1R9A;BICD1;CDC73;WDR4…
Genes Up-Regulated In Striatum Of R6/2 Vs WT Mice GSE109416	HDSigDB 2021	DiestVMaleAccent1 (Diestrus vs Male, female high/KO upreg, male low/KO downreg)	187	2028	5.19064e-12	1.8957	4.75753e-13	53.7884	GDA;NEXMIF;UBE3A;OGDHL;IKZF2;ARHGAP35;ALKBH8;UBE2L3;IPO5;ATCAY;GNPTAB;PPP2R1A;DPYSL3;KPNA6;NFATC2IP;EP300;PLS3;KPNA4;ARID2;KPNA3;FAM81A;SOX5;PRKAB2;MEF2C;PHYH;EIF1AX;RALGAPA1;DYRK1A;AP1B1;ANK2;IPCEF1;MYT1;MTURN;RNF41;PYGO1;AR;XRN1;RUFY3;TBC1D24;ZFPM2;ATP6V1A;MTMR1;CUL5;MAX;MAGED1;GLO1;PDE1A;MYCBP2;ANKRD12;GMPS;RASAL2;PDS5A;MACROH2A1;DNAJC27;PLCXD2;GIGYF2;TTBK2;CAMSAP2;GOLGA7B;LARP1;PRKAR2A;RAD21;…
Genes Up-Regulated In Striatum Of R6/2 Vs WT Mice GSE109416	HDSigDB 2021	Union of DiestVMaleAccent3 and EstVMaleAccent3 (female low/KO downreg, male high/KO upreg)	187	2028	5.19064e-12	1.8957	4.75753e-13	53.7884	GDA;NEXMIF;UBE3A;OGDHL;IKZF2;ARHGAP35;ALKBH8;UBE2L3;IPO5;ATCAY;GNPTAB;PPP2R1A;DPYSL3;KPNA6;NFATC2IP;EP300;PLS3;KPNA4;ARID2;KPNA3;FAM81A;SOX5;PRKAB2;MEF2C;PHYH;EIF1AX;RALGAPA1;DYRK1A;AP1B1;ANK2;IPCEF1;MYT1;MTURN;RNF41;PYGO1;AR;XRN1;RUFY3;TBC1D24;ZFPM2;ATP6V1A;MTMR1;CUL5;MAX;MAGED1;GLO1;PDE1A;MYCBP2;ANKRD12;GMPS;RASAL2;PDS5A;MACROH2A1;DNAJC27;PLCXD2;GIGYF2;TTBK2;CAMSAP2;GOLGA7B;LARP1;PRKAR2A;RAD21;…
Genes Down-Regulated In HD Grade 2 Markers In Human Caudate Nucleus (HG-U133B) GSE3790	HDSigDB 2021	DiestVMaleAccent1 (Diestrus vs Male, female high/KO upreg, male low/KO downreg)	73	536	7.23192e-12	2.82758	6.65974e-13	79.2784	GSK3B;NRSN1;CSRNP3;FRMPD4;NEXMIF;CELF5;PPP1R9A;ELAVL1;ACTB;SYNE1;RIMS1;ATCAY;PPP4R4;NCS1;KIF5A;RGS8;CALN1;MKKS;CAMK1D;SGIP1;LMO3;TMOD2;DIO2;VPS13A;KSR2;FAM126B;PGM2L1;PHF20L1;CNKSR2;STX1B;GFOD1;LRRC7;DOK6;RELCH;BCAT1;B4GALT6;JCAD;SHANK2;NECAB1;NAPB;AGAP2;NEDD4L;TMTC1;AKAP5;PLCXD2;PAK1;MAP2;CAMK2N1;GNG7;REPS2;MAP4;LRRC4C;RAB6B;ARGLU1;LONRF2;SCAI;JAZF1;HOMER1;HUWE1;RAB27B;SORBS2;ARHGAP26;TMEM196;SV…
Genes Down-Regulated In HD Grade 2 Markers In Human Caudate Nucleus (HG-U133B) GSE3790	HDSigDB 2021	Union of DiestVMaleAccent3 and EstVMaleAccent3 (female low/KO downreg, male high/KO upreg)	73	536	7.23192e-12	2.82758	6.65974e-13	79.2784	GSK3B;NRSN1;CSRNP3;FRMPD4;NEXMIF;CELF5;PPP1R9A;ELAVL1;ACTB;SYNE1;RIMS1;ATCAY;PPP4R4;NCS1;KIF5A;RGS8;CALN1;MKKS;CAMK1D;SGIP1;LMO3;TMOD2;DIO2;VPS13A;KSR2;FAM126B;PGM2L1;PHF20L1;CNKSR2;STX1B;GFOD1;LRRC7;DOK6;RELCH;BCAT1;B4GALT6;JCAD;SHANK2;NECAB1;NAPB;AGAP2;NEDD4L;TMTC1;AKAP5;PLCXD2;PAK1;MAP2;CAMK2N1;GNG7;REPS2;MAP4;LRRC4C;RAB6B;ARGLU1;LONRF2;SCAI;JAZF1;HOMER1;HUWE1;RAB27B;SORBS2;ARHGAP26;TMEM196;SV…
Genes Changed In Mouse Granule Cells Vs Basket Cells GSE101914	HDSigDB 2021	DiestVMaleAccent1 (Diestrus vs Male, female high/KO upreg, male low/KO downreg)	186	2022	7.49767e-12	1.88919	6.93689e-13	52.8911	ITSN2;RAB3C;NCKAP1;IPO11;OXNAD1;TRRAP;DGKB;CTNND2;FMR1;SLA;CCNC;UBE3A;OGDHL;ABAT;NUDT5;ARHGAP35;DCAF6;PREX2;RIMS1;ATCAY;DPYSL3;KIF5A;TNR;SOX5;PPP1R16B;MEF2C;RALGAPA1;MAGI2;DIO2;SOX11;ANK3;HPCAL4;RNF41;DCTD;AR;SNHG14;XRN1;TBL1XR1;EEF1A2;TBC1D24;ATF7;RELCH;KCTD12;ATF6;RIN2;ANAPC1;INO80D;BHLHB9;SLC1A2;DCUN1D1;SLAIN2;TMTC1;PIK3R1;RASAL2;NYAP2;PLA2G6;MED12L;ORC5;FUT9;SNTG1;MAP2;BTBD3;RAD21;DHX36;MCMBP…
Genes Changed In Mouse Granule Cells Vs Basket Cells GSE101914	HDSigDB 2021	Union of DiestVMaleAccent3 and EstVMaleAccent3 (female low/KO downreg, male high/KO upreg)	186	2022	7.49767e-12	1.88919	6.93689e-13	52.8911	ITSN2;RAB3C;NCKAP1;IPO11;OXNAD1;TRRAP;DGKB;CTNND2;FMR1;SLA;CCNC;UBE3A;OGDHL;ABAT;NUDT5;ARHGAP35;DCAF6;PREX2;RIMS1;ATCAY;DPYSL3;KIF5A;TNR;SOX5;PPP1R16B;MEF2C;RALGAPA1;MAGI2;DIO2;SOX11;ANK3;HPCAL4;RNF41;DCTD;AR;SNHG14;XRN1;TBL1XR1;EEF1A2;TBC1D24;ATF7;RELCH;KCTD12;ATF6;RIN2;ANAPC1;INO80D;BHLHB9;SLC1A2;DCUN1D1;SLAIN2;TMTC1;PIK3R1;RASAL2;NYAP2;PLA2G6;MED12L;ORC5;FUT9;SNTG1;MAP2;BTBD3;RAD21;DHX36;MCMBP…
Genes Down-Regulated In Vehicle Treated PBMCs From Friedreich Ataxia Patients Vs Controls GSE30933	HDSigDB 2021	DiestVMaleAccent1 (Diestrus vs Male, female high/KO upreg, male low/KO downreg)	138	1355	8.84323e-12	2.08206	8.22398e-13	57.9366	ANKRD13C;OTUD4;UBE3C;TRRAP;CSE1L;NAB1;IPP;CCNC;KLHL34;DOCK10;RPS6KA3;ALKBH5;RIMS4;TATDN1;SLK;RNF114;KPNA3;MAP3K5;PPP1R16B;USP8;RALGAPA1;DYRK1A;ANK3;IPCEF1;FBXO11;LZTFL1;ARMCX2;WDR82;UBE2V2;SUCLG2;TBC1D23;TMEM87A;SET;CUL5;GLO1;MYCBP2;ANKRD12;DCUN1D1;PIK3R1;PDS5B;MTMR4;DNAJC28;ARHGAP12;UBR5;MCMBP;STXBP5;MAP4;HSPA8;CREBBP;UBE2H;FZD3;CPSF6;CEP350;INTS2;TRAPPC8;FOXN2;ARHGAP32;PAN3;NBEA;CNOT1;AGO2;KYAT…
Coexpressed Gene Module M18A From Cerebral Cortex PMID18849986	HDSigDB 2021	DiestVMaleAccent1 (Diestrus vs Male, female high/KO upreg, male low/KO downreg)	96	811	8.84323e-12	2.42934	8.25827e-13	67.5901	NCKAP1;TOP2B;KDM5C;UBXN2B;CSE1L;NAB1;FMR1;ADK;ABAT;BICD1;UBE2L3;DCAF6;IPO5;SLK;SCP2;CHORDC1;KPNA6;ACADM;TRAPPC13;SPTAN1;KPNA1;AGFG1;PRKCI;PHYH;PEG3;VPS13D;TSC22D2;VPS13A;LARP4B;TUG1;FBXO11;IMPACT;ILF3;VAMP7;CREB1;SMS;UBE2V2;RAPGEF4;GAS7;CHMP5;ATP6V1A;MTMR1;GRAMD1B;SET;ANAPC15;MEAF6;CUL5;MGRN1;AGAP2;CREBL2;RNF6;PDS5B;PDS5A;PPM1F;CAMSAP2;STRN3;SH3BGRL;LARP1;FAM168A;RAD21;BTBD3;UBR5;SPOP;FSD1;ATP6V0…
Genes Down-Regulated In Vehicle Treated PBMCs From Friedreich Ataxia Patients Vs Controls GSE30933	HDSigDB 2021	Union of DiestVMaleAccent3 and EstVMaleAccent3 (female low/KO downreg, male high/KO upreg)	138	1355	8.84323e-12	2.08206	8.22398e-13	57.9366	ANKRD13C;OTUD4;UBE3C;TRRAP;CSE1L;NAB1;IPP;CCNC;KLHL34;DOCK10;RPS6KA3;ALKBH5;RIMS4;TATDN1;SLK;RNF114;KPNA3;MAP3K5;PPP1R16B;USP8;RALGAPA1;DYRK1A;ANK3;IPCEF1;FBXO11;LZTFL1;ARMCX2;WDR82;UBE2V2;SUCLG2;TBC1D23;TMEM87A;SET;CUL5;GLO1;MYCBP2;ANKRD12;DCUN1D1;PIK3R1;PDS5B;MTMR4;DNAJC28;ARHGAP12;UBR5;MCMBP;STXBP5;MAP4;HSPA8;CREBBP;UBE2H;FZD3;CPSF6;CEP350;INTS2;TRAPPC8;FOXN2;ARHGAP32;PAN3;NBEA;CNOT1;AGO2;KYAT…
Coexpressed Gene Module M18A From Cerebral Cortex PMID18849986	HDSigDB 2021	Union of DiestVMaleAccent3 and EstVMaleAccent3 (female low/KO downreg, male high/KO upreg)	96	811	8.84323e-12	2.42934	8.25827e-13	67.5901	NCKAP1;TOP2B;KDM5C;UBXN2B;CSE1L;NAB1;FMR1;ADK;ABAT;BICD1;UBE2L3;DCAF6;IPO5;SLK;SCP2;CHORDC1;KPNA6;ACADM;TRAPPC13;SPTAN1;KPNA1;AGFG1;PRKCI;PHYH;PEG3;VPS13D;TSC22D2;VPS13A;LARP4B;TUG1;FBXO11;IMPACT;ILF3;VAMP7;CREB1;SMS;UBE2V2;RAPGEF4;GAS7;CHMP5;ATP6V1A;MTMR1;GRAMD1B;SET;ANAPC15;MEAF6;CUL5;MGRN1;AGAP2;CREBL2;RNF6;PDS5B;PDS5A;PPM1F;CAMSAP2;STRN3;SH3BGRL;LARP1;FAM168A;RAD21;BTBD3;UBR5;SPOP;FSD1;ATP6V0…
High light scatter reticulocyte percentage 30290 raw	Nearby Genes of UK Biobank Trait GWAS	DiestVMaleAccent3 (Diestrus vs Male, female low/KO downreg, male high/KO upreg)	357	4539	9.1056e-12	1.68861	1.59189e-14	53.6494	ITSN2;CYFIP1;IPO11;TRIO;SPARC;MTRR;ZFYVE9;TRRAP;FRMPD4;IKZF2;UBE2L3;PREX2;RPS6KA3;GPBP1;DPYSL3;CHORDC1;SOX6;TBC1D22A;GLUL;PKNOX2;CALN1;AGFG1;SOX5;MEF2A;PAQR8;UNC13C;MEF2C;PRKCI;OXSM;RFX3;ANK2;SOX11;ANK3;ASRGL1;AR;PPP1R3C;XRN1;PAPPA;XRN2;SUCLG2;KCTD12;ZFPM2;EPAS1;MAGED1;CEP85L;MYCBP2;LYPD1;RNF219;NEDD4L;BAZ2A;SLAIN2;TMTC1;PIK3R1;NYAP2;IQGAP2;GIGYF2;LARP1;MAP2;PRKAR2A;RAD21;DPH3;STXBP5;MAP4;RIMKLB;…
Genes Down-Regulated In HD Grade 3 Markers In Human Frontal Lobe BA4 (HG-U133B) GSE3790	HDSigDB 2021	DiestVMaleAccent1 (Diestrus vs Male, female high/KO upreg, male low/KO downreg)	34	149	9.6431e-12	5.20481	9.04692e-13	144.335	USP32;KMT2C;DCUN1D1;SLAIN2;TMTC1;RSF1;MIEF1;PPP1R9A;DNAJC27;TTBK2;PURB;FGD4;MED13;SNTG1;DENND11;DHX36;NCS1;LONRF2;ARFGEF3;CALN1;RBM33;ZYG11B;UBE2H;CBX5;STRBP;IRF2BP2;LARP4B;RBSN;UHMK1;TAOK1;AGO2;VIPAS39;SFXN5;CPEB4
Genes Down-Regulated In HD Grade 3 Markers In Human Frontal Lobe BA4 (HG-U133B) GSE3790	HDSigDB 2021	Union of DiestVMaleAccent3 and EstVMaleAccent3 (female low/KO downreg, male high/KO upreg)	34	149	9.6431e-12	5.20481	9.04692e-13	144.335	USP32;KMT2C;DCUN1D1;SLAIN2;TMTC1;RSF1;MIEF1;PPP1R9A;DNAJC27;TTBK2;PURB;FGD4;MED13;SNTG1;DENND11;DHX36;NCS1;LONRF2;ARFGEF3;CALN1;RBM33;ZYG11B;UBE2H;CBX5;STRBP;IRF2BP2;LARP4B;RBSN;UHMK1;TAOK1;AGO2;VIPAS39;SFXN5;CPEB4
Mouse 270 ProS up	Allen scRNA 2021	DiestVMaleAccent1 (Diestrus vs Male, female high/KO upreg, male low/KO downreg)	85	673	1.0218e-11	2.60531	5.58908e-13	73.5032	CYFIP1;ZFP644;KDM5B;CHIC1;NEXMIF;IPO7;CHD1;ELAVL1;CDC73;WDR44;IPO5;DUSP11;ZMYM1;PPP4R4;GPBP1;CHORDC1;EP300;KPNA4;PLXNC1;TNPO1;RAB8B;KDM6A;CNOT6L;WDR37;CDADC1;RFC1;ZFP932;DYRK1A;AP1B1;ZFP91;MMD2;TUG1;CKAP5;KCTD6;LZTFL1;AR;METTL7A1;ILF3;XRN1;ALS2;TRAF3;GAN;NME7;ACOX1;GPD1;TCEANC2;XIST;FAM193A;TBC1D23;EIF1A;DNMT1;INO80D;CUL5;STXBP4;GM38393;ZFP60;MTMR4;FAM117B;DRP2;FGD4;RMND5A;PRR14L;EIF2S3X;ZFP260;E…
Mouse 270 ProS up	Allen scRNA 2021	EstVMaleAccent1 (Estrus vs Male, female high/KO upreg, male low/KO downreg)	85	673	1.0218e-11	2.60531	5.58908e-13	73.5032	CYFIP1;ZFP644;KDM5B;CHIC1;NEXMIF;IPO7;CHD1;ELAVL1;CDC73;WDR44;IPO5;DUSP11;ZMYM1;PPP4R4;GPBP1;CHORDC1;EP300;KPNA4;PLXNC1;TNPO1;RAB8B;KDM6A;CNOT6L;WDR37;CDADC1;RFC1;ZFP932;DYRK1A;AP1B1;ZFP91;MMD2;TUG1;CKAP5;KCTD6;LZTFL1;AR;METTL7A1;ILF3;XRN1;ALS2;TRAF3;GAN;NME7;ACOX1;GPD1;TCEANC2;XIST;FAM193A;TBC1D23;EIF1A;DNMT1;INO80D;CUL5;STXBP4;GM38393;ZFP60;MTMR4;FAM117B;DRP2;FGD4;RMND5A;PRR14L;EIF2S3X;ZFP260;E…
Mouse 270 ProS up	Allen scRNA 2021	DiestVMaleAccent3 (Diestrus vs Male, female low/KO downreg, male high/KO upreg)	85	673	1.0218e-11	2.60531	5.58908e-13	73.5032	CYFIP1;ZFP644;KDM5B;CHIC1;NEXMIF;IPO7;CHD1;ELAVL1;CDC73;WDR44;IPO5;DUSP11;ZMYM1;PPP4R4;GPBP1;CHORDC1;EP300;KPNA4;PLXNC1;TNPO1;RAB8B;KDM6A;CNOT6L;WDR37;CDADC1;RFC1;ZFP932;DYRK1A;AP1B1;ZFP91;MMD2;TUG1;CKAP5;KCTD6;LZTFL1;AR;METTL7A1;ILF3;XRN1;ALS2;TRAF3;GAN;NME7;ACOX1;GPD1;TCEANC2;XIST;FAM193A;TBC1D23;EIF1A;DNMT1;INO80D;CUL5;STXBP4;GM38393;ZFP60;MTMR4;FAM117B;DRP2;FGD4;RMND5A;PRR14L;EIF2S3X;ZFP260;E…
Mouse 270 ProS up	Allen scRNA 2021	EstVMaleAccent3 (Estrus vs Male, female low/KO downreg, male high/KO upreg)	85	673	1.0218e-11	2.60531	5.58908e-13	73.5032	CYFIP1;ZFP644;KDM5B;CHIC1;NEXMIF;IPO7;CHD1;ELAVL1;CDC73;WDR44;IPO5;DUSP11;ZMYM1;PPP4R4;GPBP1;CHORDC1;EP300;KPNA4;PLXNC1;TNPO1;RAB8B;KDM6A;CNOT6L;WDR37;CDADC1;RFC1;ZFP932;DYRK1A;AP1B1;ZFP91;MMD2;TUG1;CKAP5;KCTD6;LZTFL1;AR;METTL7A1;ILF3;XRN1;ALS2;TRAF3;GAN;NME7;ACOX1;GPD1;TCEANC2;XIST;FAM193A;TBC1D23;EIF1A;DNMT1;INO80D;CUL5;STXBP4;GM38393;ZFP60;MTMR4;FAM117B;DRP2;FGD4;RMND5A;PRR14L;EIF2S3X;ZFP260;E…
Mouse 270 ProS up	Allen scRNA 2021	Union of DiestVMaleAccent1 and EstVMaleAccent1 (female high/KO upreg, male low/KO downreg)	85	673	1.0218e-11	2.60531	5.58908e-13	73.5032	CYFIP1;ZFP644;KDM5B;CHIC1;NEXMIF;IPO7;CHD1;ELAVL1;CDC73;WDR44;IPO5;DUSP11;ZMYM1;PPP4R4;GPBP1;CHORDC1;EP300;KPNA4;PLXNC1;TNPO1;RAB8B;KDM6A;CNOT6L;WDR37;CDADC1;RFC1;ZFP932;DYRK1A;AP1B1;ZFP91;MMD2;TUG1;CKAP5;KCTD6;LZTFL1;AR;METTL7A1;ILF3;XRN1;ALS2;TRAF3;GAN;NME7;ACOX1;GPD1;TCEANC2;XIST;FAM193A;TBC1D23;EIF1A;DNMT1;INO80D;CUL5;STXBP4;GM38393;ZFP60;MTMR4;FAM117B;DRP2;FGD4;RMND5A;PRR14L;EIF2S3X;ZFP260;E…
Mouse 270 ProS up	Allen scRNA 2021	Union of DiestVMaleAccent3 and EstVMaleAccent3 (female low/KO downreg, male high/KO upreg)	85	673	1.0218e-11	2.60531	5.58908e-13	73.5032	CYFIP1;ZFP644;KDM5B;CHIC1;NEXMIF;IPO7;CHD1;ELAVL1;CDC73;WDR44;IPO5;DUSP11;ZMYM1;PPP4R4;GPBP1;CHORDC1;EP300;KPNA4;PLXNC1;TNPO1;RAB8B;KDM6A;CNOT6L;WDR37;CDADC1;RFC1;ZFP932;DYRK1A;AP1B1;ZFP91;MMD2;TUG1;CKAP5;KCTD6;LZTFL1;AR;METTL7A1;ILF3;XRN1;ALS2;TRAF3;GAN;NME7;ACOX1;GPD1;TCEANC2;XIST;FAM193A;TBC1D23;EIF1A;DNMT1;INO80D;CUL5;STXBP4;GM38393;ZFP60;MTMR4;FAM117B;DRP2;FGD4;RMND5A;PRR14L;EIF2S3X;ZFP260;E…
KDM5B 21448134 ChIP-Seq MESCs Mouse	ChEA 2016-TF Regulator Predictions by ChIP	Union of DiestVMaleAccent1 and EstVMaleAccent1 (female high/KO upreg, male low/KO downreg)	305	3724	1.38869e-11	1.73484	2.16307e-14	54.5861	ITSN2;CYFIP2;CYFIP1;NCKAP1;IPO11;AHCYL1;MTRR;PANK3;TRRAP;EPRS;ALKBH8;ALKBH5;RNF114;PPP2R1A;GPBP1;CHORDC1;PLCE1;LUC7L;SOX6;AGFG1;MED1;SAP30BP;PRKCI;AP1B1;RC3H2;ATG12;PPP1R3C;KARS;XRN1;WDR82;B230219D22RIK;XRN2;ATF7;ZFPM2;TMEM87A;SET;STXBP4;NEDD4L;BAZ2A;MTMR4;IQGAP2;GIGYF2;MED12L;EPB41L5;LARP1;RAD21;DHX36;RIMKLB;ARGLU1;CREBBP;PHC1;NEBL;NCAPH2;INTS2;EXOC6B;SMARCA5;PUM1;PRDX6;PUM2;FAM135B;NMT1;CDK12;Z…
KDM5B 21448134 ChIP-Seq MESCs Mouse	ChEA 2016-TF Regulator Predictions by ChIP	Union of DiestVMaleAccent3 and EstVMaleAccent3 (female low/KO downreg, male high/KO upreg)	305	3724	1.38869e-11	1.73484	2.16307e-14	54.5861	ITSN2;CYFIP2;CYFIP1;NCKAP1;IPO11;AHCYL1;PANK3;MTRR;TRRAP;EPRS;ALKBH8;ALKBH5;RNF114;PPP2R1A;GPBP1;CHORDC1;PLCE1;LUC7L;SOX6;AGFG1;MED1;SAP30BP;PRKCI;AP1B1;RC3H2;ATG12;PPP1R3C;KARS;XRN1;WDR82;B230219D22RIK;XRN2;ATF7;ZFPM2;TMEM87A;SET;STXBP4;NEDD4L;BAZ2A;MTMR4;IQGAP2;GIGYF2;MED12L;EPB41L5;LARP1;RAD21;DHX36;RIMKLB;ARGLU1;CREBBP;PHC1;NEBL;NCAPH2;INTS2;EXOC6B;SMARCA5;PUM1;PRDX6;PUM2;FAM135B;NMT1;CDK12;Z…
Genes Up-Regulated In Mouse Granule Cells Vs Basket Cells GSE101914	HDSigDB 2021	DiestVMaleAccent1 (Diestrus vs Male, female high/KO upreg, male low/KO downreg)	134	1311	1.51041e-11	2.08648	1.42356e-12	56.9148	ITSN2;RAB3C;NCKAP1;IPO11;OXNAD1;DGKB;CTNND2;FMR1;CCNC;NUDT5;DCAF6;PREX2;DPYSL3;TNR;SOX5;MEF2C;RALGAPA1;MAGI2;DIO2;SOX11;DCTD;XRN1;TBL1XR1;RELCH;KCTD12;ATF6;RIN2;ANAPC1;INO80D;BHLHB9;SLC1A2;DCUN1D1;SLAIN2;PIK3R1;RASAL2;NYAP2;MED12L;ORC5;FUT9;MAP2;BTBD3;RAD21;DHX36;ABL2;STXBP5;NDP;LRRC4C;ARGLU1;DTNA;HOMER1;NEBL;CAV2;EDEM1;KLHL28;DCLK1;ST18;FOSL2;NR4A2;MFHAS1;EHD3;DIAPH2;PLCXD3;FER;DLG2;NBEA;DMXL1;B…
Genes Up-Regulated In Mouse Granule Cells Vs Basket Cells GSE101914	HDSigDB 2021	Union of DiestVMaleAccent3 and EstVMaleAccent3 (female low/KO downreg, male high/KO upreg)	134	1311	1.51041e-11	2.08648	1.42356e-12	56.9148	ITSN2;RAB3C;NCKAP1;IPO11;OXNAD1;DGKB;CTNND2;FMR1;CCNC;NUDT5;DCAF6;PREX2;DPYSL3;TNR;SOX5;MEF2C;RALGAPA1;MAGI2;DIO2;SOX11;DCTD;XRN1;TBL1XR1;RELCH;KCTD12;ATF6;RIN2;ANAPC1;INO80D;BHLHB9;SLC1A2;DCUN1D1;SLAIN2;PIK3R1;RASAL2;NYAP2;MED12L;ORC5;FUT9;MAP2;BTBD3;RAD21;DHX36;ABL2;STXBP5;NDP;LRRC4C;ARGLU1;DTNA;HOMER1;NEBL;CAV2;EDEM1;KLHL28;DCLK1;ST18;FOSL2;NR4A2;MFHAS1;EHD3;DIAPH2;PLCXD3;FER;DLG2;NBEA;DMXL1;B…
Genes Down-Regulated In Parkinson Disease Markers In Human Substantia Nigra GSE26927	HDSigDB 2021	DiestVMaleAccent1 (Diestrus vs Male, female high/KO upreg, male low/KO downreg)	114	1047	1.53284e-11	2.22412	1.45132e-12	60.6262	CYFIP2;NCKAP1;RAB3C;OXNAD1;PANK3;FRMPD4;DGKB;NEXMIF;OGDHL;UBE3A;ABAT;ALKBH8;RIMS4;SCP2;PPP2R1A;PPP4R4;SOX6;PDE8B;FAM81A;PHYH;LMO3;RFX3;ANK2;SOX11;HPCAL4;FBXO11;LZTFL1;UHMK1;AR;DOK6;UBE2V2;ZFPM2;ANAPC15;GLO1;CEP85L;LYPD1;NEDD4L;LIN7A;UBFD1;ORC5;SNTG1;MAP2;DHX36;SRGAP3;LRRC4C;RAB6B;LONRF2;FZD3;ANKRD26;RASL10B;KLHL28;DSTN;BTBD7;HOOK3;CORO2A;PBX1;NR4A2;EHD3;GNAL;UBE2N;CDK14;CPEB2;GSK3B;CSRNP3;CLTC;EL…
Genes Down-Regulated In Parkinson Disease Markers In Human Substantia Nigra GSE26927	HDSigDB 2021	Union of DiestVMaleAccent3 and EstVMaleAccent3 (female low/KO downreg, male high/KO upreg)	114	1047	1.53284e-11	2.22412	1.45132e-12	60.6262	CYFIP2;NCKAP1;RAB3C;OXNAD1;PANK3;FRMPD4;DGKB;NEXMIF;OGDHL;UBE3A;ABAT;ALKBH8;RIMS4;SCP2;PPP2R1A;PPP4R4;SOX6;PDE8B;FAM81A;PHYH;LMO3;RFX3;ANK2;SOX11;HPCAL4;FBXO11;LZTFL1;UHMK1;AR;DOK6;UBE2V2;ZFPM2;ANAPC15;GLO1;CEP85L;LYPD1;NEDD4L;LIN7A;UBFD1;ORC5;SNTG1;MAP2;DHX36;SRGAP3;LRRC4C;RAB6B;LONRF2;FZD3;ANKRD26;RASL10B;KLHL28;DSTN;BTBD7;HOOK3;CORO2A;PBX1;NR4A2;EHD3;GNAL;UBE2N;CDK14;CPEB2;GSK3B;CSRNP3;CLTC;EL…
Genes Down-Regulated In Pizotifen Treated STHdhQ111 Vs Control GSE129143	HDSigDB 2021	DiestVMaleAccent1 (Diestrus vs Male, female high/KO upreg, male low/KO downreg)	104	925	2.28778e-11	2.29692	2.17601e-12	61.6803	CYFIP1;TRIO;WIPF2;ARHGAP35;PTAR1;SYNGAP1;SESN3;S100A1;OXSM;ANK3;THAP2;MTURN;BCR;MARF1;ARMCX2;TBL1XR1;SELENOP;SIK3;KCTD12;ZFPM2;KMT2C;SLC1A2;UBR5;EIF4EBP2;RAB11FIP4;KLHDC10;TCAF1;UBE2H;GSTM1;CBX5;HSPA12A;PHC3;ACADSB;SMAD5;PBX1;DCLK1;POU6F1;CNOT1;AGO1;AGO2;GSTM5;KDM5B;LRSAM1;KDM5C;CDKN1B;HIP1;LRRK2;SETD7;CELF5;ARRB1;RSF1;DSTYK;SIPA1L1;ACADM;SPTAN1;COA5;NCOA1;ARHGEF11;ZCCHC24;LYNX1;ZHX3;ARHGEF12;CAM…
Genes Down-Regulated In Pizotifen Treated STHdhQ111 Vs Control GSE129143	HDSigDB 2021	Union of DiestVMaleAccent3 and EstVMaleAccent3 (female low/KO downreg, male high/KO upreg)	104	925	2.28778e-11	2.29692	2.17601e-12	61.6803	CYFIP1;TRIO;WIPF2;ARHGAP35;PTAR1;SYNGAP1;SESN3;S100A1;OXSM;ANK3;THAP2;MTURN;BCR;MARF1;ARMCX2;TBL1XR1;SELENOP;SIK3;KCTD12;ZFPM2;KMT2C;SLC1A2;UBR5;EIF4EBP2;RAB11FIP4;KLHDC10;TCAF1;UBE2H;GSTM1;CBX5;HSPA12A;PHC3;ACADSB;SMAD5;PBX1;DCLK1;POU6F1;CNOT1;AGO1;AGO2;GSTM5;KDM5B;LRSAM1;KDM5C;CDKN1B;HIP1;LRRK2;SETD7;CELF5;ARRB1;RSF1;DSTYK;SIPA1L1;ACADM;SPTAN1;COA5;NCOA1;ARHGEF11;ZCCHC24;LYNX1;ZHX3;ARHGEF12;CAM…
Genes Up-Regulated In Myotonic Dystrophy 2 Markers In Human Skeletal Muscle GSE48828	HDSigDB 2021	DiestVMaleAccent1 (Diestrus vs Male, female high/KO upreg, male low/KO downreg)	136	1347	2.43619e-11	2.05848	2.32771e-12	55.1387	OTUD4;CYFIP2;OXNAD1;TRIO;TRRAP;IKZF2;ARHGAP35;AMOT;PREX2;GNPTAB;OSBP;KIF5A;LUC7L;PLXNC1;SOX6;MEF2C;RALGAPA1;ACOT11;MRTFB;ANK2;ANK3;TUG1;RC3H2;AR;MARF1;PPP1R3C;RUFY3;GPD1;ZFPM2;INO80D;BHLHB9;KMT2A;MAOB;KMT2C;CEP85L;MYCBP2;ANKRD12;CREBL2;RASAL2;MTMR4;NDRG2;DNAJC28;ATXN1;ZKSCAN8;MAP4;RIMKLB;ARGLU1;ANKRD26;DTNA;HOMER2;OGA;PRRC2C;HELZ;HSPA2;PBX1;MED13L;AFDN;CCDC88A;ARHGAP32;FER;DLG2;NBEA;AGO4;AGO1;DMX…
Genes Up-Regulated In Myotonic Dystrophy 2 Markers In Human Skeletal Muscle GSE48828	HDSigDB 2021	Union of DiestVMaleAccent3 and EstVMaleAccent3 (female low/KO downreg, male high/KO upreg)	136	1347	2.43619e-11	2.05848	2.32771e-12	55.1387	OTUD4;CYFIP2;OXNAD1;TRIO;TRRAP;IKZF2;ARHGAP35;AMOT;PREX2;GNPTAB;OSBP;KIF5A;LUC7L;PLXNC1;SOX6;MEF2C;RALGAPA1;ACOT11;MRTFB;ANK2;ANK3;TUG1;RC3H2;AR;MARF1;PPP1R3C;RUFY3;GPD1;ZFPM2;INO80D;BHLHB9;KMT2A;MAOB;KMT2C;CEP85L;MYCBP2;ANKRD12;CREBL2;RASAL2;MTMR4;NDRG2;DNAJC28;ATXN1;ZKSCAN8;MAP4;RIMKLB;ARGLU1;ANKRD26;DTNA;HOMER2;OGA;PRRC2C;HELZ;HSPA2;PBX1;MED13L;AFDN;CCDC88A;ARHGAP32;FER;DLG2;NBEA;AGO4;AGO1;DMX…
CAG Length-Dependent Proteins In 6 Mon Mouse Striatum PMID26900923	HDSigDB 2021	DiestVMaleAccent1 (Diestrus vs Male, female high/KO upreg, male low/KO downreg)	135	1335	2.63753e-11	2.06122	2.53148e-12	55.0391	CYFIP2;DGKG;UBXN2B;FRMPD4;DGKB;OGDHL;KLHDC7A;FGF1;RIMS1;SYNGAP1;RNF114;PPP2R1A;PPP4R4;DPYSL3;SLC16A7;TNR;PLS3;RGS8;MAP3K5;PPP1R16B;RALGAPA1;OXSM;LZTFL1;BCR;TANC1;ILF3;RALGAPB;ARMCX2;DOK6;GPD1;SMS;SIK3;SUCLG2;NECAB1;ANAPC15;ABHD4;MYCBP2;GMPS;AGAP2;PIK3R1;RASAL2;IQGAP2;STK4;GIGYF2;ATXN1;MAP2;DHX36;MAP4;LRRC4C;RAB6B;PCK2;HOMER1;HOMER2;EEF2;PUM1;ACADSB;DCLK1;ARHGAP33;ARHGAP32;GNAL;DLG2;KYAT3;MAGED2;A…
CAG Length-Dependent Proteins In 6 Mon Mouse Striatum PMID26900923	HDSigDB 2021	Union of DiestVMaleAccent3 and EstVMaleAccent3 (female low/KO downreg, male high/KO upreg)	135	1335	2.63753e-11	2.06122	2.53148e-12	55.0391	CYFIP2;DGKG;UBXN2B;FRMPD4;DGKB;OGDHL;KLHDC7A;FGF1;RIMS1;SYNGAP1;RNF114;PPP2R1A;PPP4R4;DPYSL3;SLC16A7;TNR;PLS3;RGS8;MAP3K5;PPP1R16B;RALGAPA1;OXSM;LZTFL1;BCR;TANC1;ILF3;RALGAPB;ARMCX2;DOK6;GPD1;SMS;SIK3;SUCLG2;NECAB1;ANAPC15;ABHD4;MYCBP2;GMPS;AGAP2;PIK3R1;RASAL2;IQGAP2;STK4;GIGYF2;ATXN1;MAP2;DHX36;MAP4;LRRC4C;RAB6B;PCK2;HOMER1;HOMER2;EEF2;PUM1;ACADSB;DCLK1;ARHGAP33;ARHGAP32;GNAL;DLG2;KYAT3;MAGED2;A…
Down-regulated Genes In Cortex Of 6 Mon HD Q175 Mice Vs Q20 PMID26900923	HDSigDB 2021	DiestVMaleAccent1 (Diestrus vs Male, female high/KO upreg, male low/KO downreg)	106	956	3.23715e-11	2.26213	3.12098e-12	59.9302	RAB3C;AHCYL1;PANK3;DGKB;PPP4R4;OSBP;SLC16A7;RGS8;PDE8B;KPNA3;PPFIA4;GLUL;FAM81A;PKNOX2;DIO2;IPCEF1;ASRGL1;KCTD6;LZTFL1;MOSMO;STX1B;TBL1XR1;GPD1;ELMO2;ATF6;SLC1A2;TMTC1;NDRG2;PLCXD2;CPLX3;EPB41L5;PRKAR2A;ZMAT4;ABL2;TPPP;RAB6B;SKIL;ZKSCAN1;GSTM3;EGR2;FZD3;GSTM1;CBX5;HOMER2;HOOK3;DCLK1;FOSL2;NR4A2;PEX5L;DIAPH2;UBE2N;ANP32E;SFXN5;GSTM5;CDK16;GSK3B;SETD2;B4GALT1;CLTC;DUSP18;ARHGAP5;PPP1R9A;ELAVL1;PITP…
Down-regulated Genes In Cortex Of 6 Mon HD Q175 Mice Vs Q20 PMID26900923	HDSigDB 2021	Union of DiestVMaleAccent3 and EstVMaleAccent3 (female low/KO downreg, male high/KO upreg)	106	956	3.23715e-11	2.26213	3.12098e-12	59.9302	RAB3C;AHCYL1;PANK3;DGKB;PPP4R4;OSBP;SLC16A7;RGS8;PDE8B;KPNA3;PPFIA4;GLUL;FAM81A;PKNOX2;DIO2;IPCEF1;ASRGL1;KCTD6;LZTFL1;MOSMO;STX1B;TBL1XR1;GPD1;ELMO2;ATF6;SLC1A2;TMTC1;NDRG2;PLCXD2;CPLX3;EPB41L5;PRKAR2A;ZMAT4;ABL2;TPPP;RAB6B;SKIL;ZKSCAN1;GSTM3;EGR2;FZD3;GSTM1;CBX5;HOMER2;HOOK3;DCLK1;FOSL2;NR4A2;PEX5L;DIAPH2;UBE2N;ANP32E;SFXN5;GSTM5;CDK16;GSK3B;SETD2;B4GALT1;CLTC;DUSP18;ARHGAP5;PPP1R9A;ELAVL1;PITP…
VLMC Vascular And Leptomeningeal Cell-Enriched Genes PMID30078729	HDSigDB 2021	DiestVMaleAccent1 (Diestrus vs Male, female high/KO upreg, male low/KO downreg)	198	2235	3.75325e-11	1.81508	3.6348e-12	47.81	CYFIP2;CYFIP1;GMFB;AHCYL1;SPARC;ARAF;ABAT;ACTB;PREX2;ZMIZ1;PPP2R1A;CHORDC1;LUC7L;CIAO2A;GLUL;ANK3;RC3H2;XRN2;KCTD12;ALDH7A1;SET;EPAS1;MAGED1;MYCBP2;PIK3R1;SMIM7;GIGYF2;SULT1A1;MAP4;ARGLU1;CREBBP;GSTM1;TIPARP;PRRC2C;IRF2BP2;PUM1;GNG12;ACADSB;FOSL2;CCDC88A;NMT1;ANP32E;FXYD6;MAGED2;CPEB2;GSTM5;CDK16;PHF3;TOP2B;SMG1;SETD2;BTG1;CLTC;ADK;PCMTD2;NIPBL;MED13;TRIM2;CHMP1A;ACADM;SPTAN1;TEAD1;PCMTD1;ZCCHC24…
VLMC Vascular And Leptomeningeal Cell-Enriched Genes PMID30078729	HDSigDB 2021	Union of DiestVMaleAccent3 and EstVMaleAccent3 (female low/KO downreg, male high/KO upreg)	198	2235	3.75325e-11	1.81508	3.6348e-12	47.81	CYFIP2;CYFIP1;GMFB;AHCYL1;SPARC;ARAF;ABAT;ACTB;PREX2;ZMIZ1;PPP2R1A;CHORDC1;LUC7L;CIAO2A;GLUL;ANK3;RC3H2;XRN2;KCTD12;ALDH7A1;SET;EPAS1;MAGED1;MYCBP2;PIK3R1;SMIM7;GIGYF2;SULT1A1;MAP4;ARGLU1;CREBBP;GSTM1;TIPARP;PRRC2C;IRF2BP2;PUM1;GNG12;ACADSB;FOSL2;CCDC88A;NMT1;ANP32E;FXYD6;MAGED2;CPEB2;GSTM5;CDK16;PHF3;TOP2B;SMG1;SETD2;BTG1;CLTC;ADK;PCMTD2;NIPBL;MED13;TRIM2;CHMP1A;ACADM;SPTAN1;TEAD1;PCMTD1;ZCCHC24…
Coexpressed Gene Module M11A From Cerebral Cortex PMID18849986	HDSigDB 2021	DiestVMaleAccent1 (Diestrus vs Male, female high/KO upreg, male low/KO downreg)	36	174	4.40559e-11	4.59547	4.28559e-12	120.29	PHF3;GSK3B;CSRNP3;KMT2A;DDX24;PIK3R1;PPP1R9A;TTBK2;TRAK2;YY1;RO60;SIPA1L1;PSD3;UBN1;SLC16A7;IDS;PHACTR1;ARIH1;TNPO1;CEP350;NCOA3;PRRC2C;KLHL24;CDC42BPA;HIPK1;ATG12;MED13L;MARCKS;GNAL;AGO3;APPBP2;TCF4;KRAS;PTPN4;MXD4;GAS7
Coexpressed Gene Module M11A From Cerebral Cortex PMID18849986	HDSigDB 2021	Union of DiestVMaleAccent3 and EstVMaleAccent3 (female low/KO downreg, male high/KO upreg)	36	174	4.40559e-11	4.59547	4.28559e-12	120.29	PHF3;GSK3B;CSRNP3;KMT2A;DDX24;PIK3R1;PPP1R9A;TTBK2;TRAK2;YY1;RO60;SIPA1L1;PSD3;UBN1;SLC16A7;IDS;PHACTR1;ARIH1;TNPO1;CEP350;NCOA3;PRRC2C;KLHL24;CDC42BPA;HIPK1;ATG12;MED13L;MARCKS;GNAL;AGO3;APPBP2;TCF4;KRAS;PTPN4;MXD4;GAS7
Down-regulated Genes In Striatum Of 10 Mon HD Q140 Mice Vs Q20 GSE78274	HDSigDB 2021	DiestVMaleAccent1 (Diestrus vs Male, female high/KO upreg, male low/KO downreg)	185	2055	5.65876e-11	1.83918	5.52909e-12	47.6733	CYFIP2;RAB3C;NCKAP1;ALDH1L1;AHCYL1;SPARC;ZFYVE9;FRMPD4;DGKB;NAB1;CTNND2;WIPF2;FAM107A;KLHDC7A;RORB;NUDT5;AMOT;RGS5;PPP4R4;PLCE1;GLUL;MAP3K5;AGFG1;SOX5;PPP1R16B;PAQR8;UNC13C;PRKCI;ACOT11;TMOD2;DIO2;PHKA1;MMD2;ASRGL1;KCTD6;BCR;MOSMO;MARF1;PPP1R3C;GPD1;SELENOP;SIK3;ATF6;JCAD;XPR1;NECAB1;SHC3;KMT2A;SDC4;ABHD4;EPAS1;SLC1A2;DCUN1D1;NEDD4L;MTMR4;IQGAP2;NDRG2;SULT1A1;ATXN1;FUT9;BTBD3;ZMAT4;RAB6B;RAP1GAP2…
Down-regulated Genes In Striatum Of 10 Mon HD Q140 Mice Vs Q20 GSE78274	HDSigDB 2021	Union of DiestVMaleAccent3 and EstVMaleAccent3 (female low/KO downreg, male high/KO upreg)	185	2055	5.65876e-11	1.83918	5.52909e-12	47.6733	CYFIP2;RAB3C;NCKAP1;ALDH1L1;AHCYL1;SPARC;ZFYVE9;FRMPD4;DGKB;NAB1;CTNND2;WIPF2;FAM107A;KLHDC7A;RORB;NUDT5;AMOT;RGS5;PPP4R4;PLCE1;GLUL;MAP3K5;AGFG1;SOX5;PPP1R16B;PAQR8;UNC13C;PRKCI;ACOT11;TMOD2;DIO2;PHKA1;MMD2;ASRGL1;KCTD6;BCR;MOSMO;MARF1;PPP1R3C;GPD1;SELENOP;SIK3;ATF6;JCAD;XPR1;NECAB1;SHC3;KMT2A;SDC4;ABHD4;EPAS1;SLC1A2;DCUN1D1;NEDD4L;MTMR4;IQGAP2;NDRG2;SULT1A1;ATXN1;FUT9;BTBD3;ZMAT4;RAB6B;RAP1GAP2…
Genes Down-Regulated In dSPNs Of R6/2 Vs WT PMID32681824	HDSigDB 2021	DiestVMaleAccent1 (Diestrus vs Male, female high/KO upreg, male low/KO downreg)	88	739	5.79466e-11	2.43505	5.68693e-12	63.0503	CYFIP2;NCKAP1;GSK3B;AHCYL1;FRMPD4;DGKB;LRRK2;CELF5;PPP1R9A;LYST;PITPNC1;DCAF6;SYNE1;SIPA1L1;SESN3;PPP4R4;SCMH1;PHACTR1;ERC2;PDE8B;PCMTD1;CALN1;PPP1R16B;NSF;UNC13C;PRKCI;LYNX1;CAMK1D;KSR2;ANK3;SPTB;BCR;CNKSR2;ARHGEF9;MMP16;GFOD1;LRRC7;ATF6;MGLL;JCAD;KDM7A;GAS7;RAPGEF4;STAU2;ROCK2;ABHD2;CAMK2A;AGAP2;NEDD4L;IQGAP2;ADD2;ATXN1;ACVR1C;RMND5A;SV2C;CAMK2N1;FUT9;ZMAT4;GNG7;REPS2;LRRC4C;ARGLU1;MAPK4;SASH1;…
Genes Down-Regulated In dSPNs Of R6/2 Vs WT PMID32681824	HDSigDB 2021	Union of DiestVMaleAccent3 and EstVMaleAccent3 (female low/KO downreg, male high/KO upreg)	88	739	5.79466e-11	2.43505	5.68693e-12	63.0503	CYFIP2;NCKAP1;GSK3B;AHCYL1;FRMPD4;DGKB;LRRK2;CELF5;PPP1R9A;LYST;PITPNC1;DCAF6;SYNE1;SIPA1L1;SESN3;PPP4R4;SCMH1;PHACTR1;ERC2;PDE8B;PCMTD1;CALN1;PPP1R16B;NSF;UNC13C;PRKCI;LYNX1;CAMK1D;KSR2;ANK3;SPTB;BCR;CNKSR2;ARHGEF9;MMP16;GFOD1;LRRC7;ATF6;MGLL;JCAD;KDM7A;GAS7;RAPGEF4;STAU2;ROCK2;ABHD2;CAMK2A;AGAP2;NEDD4L;IQGAP2;ADD2;ATXN1;ACVR1C;RMND5A;SV2C;CAMK2N1;FUT9;ZMAT4;GNG7;REPS2;LRRC4C;ARGLU1;MAPK4;SASH1;…
PITX2 KO 786O HUMAN GSE67844 RNASEQ UP	Lit Mined TF Perturbation Signatures	DiestVMaleAccent1 (Diestrus vs Male, female high/KO upreg, male low/KO downreg)	69	483	7.1928e-11	2.9853	2.94938e-13	86.132	PHF3;NCKAP1;TOP2B;SMG1;PANK3;DDX3X;CLTC;USP34;RSF1;UBE3A;EPRS;ARHGAP5;IPO7;AFF4;SYNE1;AMOT;NARS;RGS5;NIPBL;PTAR1;XPO1;SESN3;DPYSL3;PSD3;PLS3;CEP170;TNPO1;VPS13C;ZFR;VPS13A;ANK3;PJA2;GREM1;TBL1XR1;SREK1;KCTD12;BCAT1;DDX24;AKAP6;PPM1K;BCLAF1;SH3BGRL;BTAF1;POLR2B;UBR5;G3BP2;RICTOR;SKIL;MCL1;RANBP2;HSPA8;NEBL;OGA;DSTN;SORBS2;GNG12;PBX1;AZIN1;MIB1;MKLN1;CCDC88A;AFDN;PLCXD3;TAOK1;ANP32E;MAGED2;TRIP12;E…
PITX2 KO 786O HUMAN GSE67844 RNASEQ UP	Lit Mined TF Perturbation Signatures	EstVMaleAccent1 (Estrus vs Male, female high/KO upreg, male low/KO downreg)	69	483	7.1928e-11	2.9853	2.94938e-13	86.132	PHF3;NCKAP1;TOP2B;SMG1;PANK3;DDX3X;CLTC;USP34;RSF1;UBE3A;EPRS;ARHGAP5;IPO7;AFF4;SYNE1;AMOT;NARS;RGS5;NIPBL;PTAR1;XPO1;SESN3;DPYSL3;PSD3;PLS3;CEP170;TNPO1;VPS13C;ZFR;VPS13A;ANK3;PJA2;GREM1;TBL1XR1;SREK1;KCTD12;BCAT1;DDX24;AKAP6;PPM1K;BCLAF1;SH3BGRL;BTAF1;POLR2B;UBR5;G3BP2;RICTOR;SKIL;MCL1;RANBP2;HSPA8;NEBL;OGA;DSTN;SORBS2;GNG12;PBX1;AZIN1;MIB1;MKLN1;CCDC88A;AFDN;PLCXD3;TAOK1;ANP32E;MAGED2;TRIP12;E…
PITX2 KO 786O HUMAN GSE67844 RNASEQ UP	Lit Mined TF Perturbation Signatures	DiestVMaleAccent3 (Diestrus vs Male, female low/KO downreg, male high/KO upreg)	69	483	7.1928e-11	2.9853	2.94938e-13	86.132	PHF3;NCKAP1;TOP2B;SMG1;PANK3;DDX3X;CLTC;USP34;RSF1;UBE3A;EPRS;ARHGAP5;IPO7;AFF4;SYNE1;AMOT;NARS;RGS5;NIPBL;PTAR1;XPO1;SESN3;DPYSL3;PSD3;PLS3;CEP170;TNPO1;VPS13C;ZFR;VPS13A;ANK3;PJA2;GREM1;TBL1XR1;SREK1;KCTD12;BCAT1;DDX24;AKAP6;PPM1K;BCLAF1;SH3BGRL;BTAF1;POLR2B;UBR5;G3BP2;RICTOR;SKIL;MCL1;RANBP2;HSPA8;NEBL;OGA;DSTN;SORBS2;GNG12;PBX1;AZIN1;MIB1;MKLN1;CCDC88A;AFDN;PLCXD3;TAOK1;ANP32E;MAGED2;TRIP12;E…
Genes Down-Regulated In Pvalb/Th-expressing Interneurons Of zQ175DN Vs WT PMID32681824	HDSigDB 2021	DiestVMaleAccent1 (Diestrus vs Male, female high/KO upreg, male low/KO downreg)	39	204	7.49527e-11	4.16953	7.38834e-12	106.87	NCKAP1;HIP1;SHC3;DDX24;ROCK2;RASAL2;ARHGAP5;PPM1E;STRN3;SPRED1;BTAF1;DHX36;REV3L;ARIH1;PLXNC1;ARGLU1;FNIP2;SRPK2;MEF2C;TCAF1;HOMER1;PEG3;GAD1;IQSEC3;AP2B1;TMEM196;HS3ST4;MIB1;BCR;MAPK10;CREB1;PDE10A;AGO3;SETBP1;DMXL1;AGO2;SIK3;SPIRE1;PAM
Genes Down-Regulated In Pvalb/Th-expressing Interneurons Of zQ175DN Vs WT PMID32681824	HDSigDB 2021	Union of DiestVMaleAccent3 and EstVMaleAccent3 (female low/KO downreg, male high/KO upreg)	39	204	7.49527e-11	4.16953	7.38834e-12	106.87	NCKAP1;HIP1;SHC3;DDX24;ROCK2;RASAL2;ARHGAP5;PPM1E;STRN3;SPRED1;BTAF1;DHX36;REV3L;ARIH1;PLXNC1;ARGLU1;FNIP2;SRPK2;MEF2C;TCAF1;HOMER1;PEG3;GAD1;IQSEC3;AP2B1;TMEM196;HS3ST4;MIB1;BCR;MAPK10;CREB1;PDE10A;AGO3;SETBP1;DMXL1;AGO2;SIK3;SPIRE1;PAM
Genes Down-Regulated In R6/1 Good Vs WT GSE135057	HDSigDB 2021	DiestVMaleAccent1 (Diestrus vs Male, female high/KO upreg, male low/KO downreg)	205	2360	8.75002e-11	1.7777	8.66302e-12	45.2814	CYFIP2;NCKAP1;AHCYL1;KLHDC7A;PREX2;SYNGAP1;SCP2;ZMIZ1;PPP4R4;GLUL;CALN1;PAQR8;UNC13C;PRKCI;PHKA1;MMD2;ASRGL1;BCR;STX1B;PPP1R3C;PAPPA;SIK3;KCTD12;ATF6;NECAB1;SDC4;EPAS1;AGAP2;NEDD4L;IQGAP2;SMIM7;ARGLU1;RAB11FIP4;GSTM3;EGR2;GSTM1;EGR3;HOMER1;NEBL;TIPARP;IRF2BP2;PRDX6;DCLK1;FOSL2;PEX5L;SLC6A8;AGO4;MYO5B;SFXN5;GSTM5;CDK16;PYGB;TOP2B;NRSN1;HIP1;PYGM;CROT;ARHGAP5;MYOM3;SIPA1L1;NCS1;TIMP4;PCMTD1;LYNX1;S…
Genes Down-Regulated In R6/1 Good Vs WT GSE135057	HDSigDB 2021	Union of DiestVMaleAccent3 and EstVMaleAccent3 (female low/KO downreg, male high/KO upreg)	205	2360	8.75002e-11	1.7777	8.66302e-12	45.2814	CYFIP2;NCKAP1;AHCYL1;KLHDC7A;PREX2;SYNGAP1;SCP2;ZMIZ1;PPP4R4;GLUL;CALN1;PAQR8;UNC13C;PRKCI;PHKA1;MMD2;ASRGL1;BCR;STX1B;PPP1R3C;PAPPA;SIK3;KCTD12;ATF6;NECAB1;SDC4;EPAS1;AGAP2;NEDD4L;IQGAP2;SMIM7;ARGLU1;RAB11FIP4;GSTM3;EGR2;GSTM1;EGR3;HOMER1;NEBL;TIPARP;IRF2BP2;PRDX6;DCLK1;FOSL2;PEX5L;SLC6A8;AGO4;MYO5B;SFXN5;GSTM5;CDK16;PYGB;TOP2B;NRSN1;HIP1;PYGM;CROT;ARHGAP5;MYOM3;SIPA1L1;NCS1;TIMP4;PCMTD1;LYNX1;S…
Nucleus Gene Module From Mouse Brain PMID20616000	HDSigDB 2021	DiestVMaleAccent1 (Diestrus vs Male, female high/KO upreg, male low/KO downreg)	82	672	8.97639e-11	2.49719	8.92594e-12	63.5338	TOP2B;NRSN1;CITED2;CSE1L;FMR1;CLTC;RASGRF1;PTEN;UBE3A;OSBPL11;TSPAN12;IPO7;CDC73;IPO5;AMOT;YY1;PIP4P2;SLK;XPO1;SCP2;PLS3;KPNA4;ARIH1;TNPO1;KPNA3;ARL5A;AGFG1;HSDL2;CNOT6L;CDADC1;EIF1AX;ZFR;DYRK1A;MSL2;AP1B1;FAM126B;TUG1;ZHX1;PTBP3;IMPACT;ARMCX2;WDR82;RUFY3;UBE2V2;PKP4;KCTD12;CLOCK;RAPGEF4;MAGEH1;NAPB;USO1;MYCBP2;MTMR9;SMIM7;MED12L;TRAK2;GNA13;BCLAF1;RIDA;SH3BGRL;TNKS2;RAD21;G3BP2;UBQLN1;RBBP9;EPS1…
Nucleus Gene Module From Mouse Brain PMID20616000	HDSigDB 2021	Union of DiestVMaleAccent3 and EstVMaleAccent3 (female low/KO downreg, male high/KO upreg)	82	672	8.97639e-11	2.49719	8.92594e-12	63.5338	TOP2B;NRSN1;CITED2;CSE1L;FMR1;CLTC;RASGRF1;PTEN;UBE3A;OSBPL11;TSPAN12;IPO7;CDC73;IPO5;AMOT;YY1;PIP4P2;SLK;XPO1;SCP2;PLS3;KPNA4;ARIH1;TNPO1;KPNA3;ARL5A;AGFG1;HSDL2;CNOT6L;CDADC1;EIF1AX;ZFR;DYRK1A;MSL2;AP1B1;FAM126B;TUG1;ZHX1;PTBP3;IMPACT;ARMCX2;WDR82;RUFY3;UBE2V2;PKP4;KCTD12;CLOCK;RAPGEF4;MAGEH1;NAPB;USO1;MYCBP2;MTMR9;SMIM7;MED12L;TRAK2;GNA13;BCLAF1;RIDA;SH3BGRL;TNKS2;RAD21;G3BP2;UBQLN1;RBBP9;EPS1…
Genes Up-Regulated In Oligodendrocytes Of HD Patients Vs Control PMID32681824	HDSigDB 2021	DiestVMaleAccent1 (Diestrus vs Male, female high/KO upreg, male low/KO downreg)	53	344	9.82373e-11	3.23386	9.81099e-12	81.9703	USP31;USP32;RASGRF1;USP34;ARRB1;PPP1R9A;DOCK10;MED13;XPO1;DPYSL5;CHORDC1;CEP170;ARFGEF3;SGIP1;MAGI2;DYRK1A;RFX3;ASH1L;ARID1B;TANC1;RUFY3;ACSBG1;INO80D;NUFIP2;KMT2C;PDS5B;PPM1K;PDS5A;ATXN1;FUT9;CLASP1;SASH1;TCF7L2;CREBBP;KCNIP3;PRRC2C;KLHL3;SORBS1;KLHL24;MIB1;MKLN1;PEX5L;FMNL2;NFIA;NBEA;NFIB;AGO2;BCL2;TCF4;SSBP2;CPEB2;FRYL;ZCCHC2
Genes Up-Regulated In Oligodendrocytes Of HD Patients Vs Control PMID32681824	HDSigDB 2021	Union of DiestVMaleAccent3 and EstVMaleAccent3 (female low/KO downreg, male high/KO upreg)	53	344	9.82373e-11	3.23386	9.81099e-12	81.9703	USP31;USP32;RASGRF1;USP34;ARRB1;PPP1R9A;DOCK10;MED13;XPO1;DPYSL5;CHORDC1;CEP170;ARFGEF3;SGIP1;MAGI2;DYRK1A;RFX3;ASH1L;ARID1B;TANC1;RUFY3;ACSBG1;INO80D;NUFIP2;KMT2C;PDS5B;PPM1K;PDS5A;ATXN1;FUT9;CLASP1;SASH1;TCF7L2;CREBBP;KCNIP3;PRRC2C;KLHL3;SORBS1;KLHL24;MIB1;MKLN1;PEX5L;FMNL2;NFIA;NBEA;NFIB;AGO2;BCL2;TCF4;SSBP2;CPEB2;FRYL;ZCCHC2
Genes Down-Regulated In Vehicle Treated Wild Type Vs STHdhQ111 GSE129143	HDSigDB 2021	DiestVMaleAccent1 (Diestrus vs Male, female high/KO upreg, male low/KO downreg)	284	3578	1.0944e-10	1.64678	1.09771e-11	41.5569	NCKAP1;GMFB;PANK3;PLEKHB2;WIPF2;ARAF;IPP;KLHDC7A;NUDT5;ALKBH8;UBE2L3;RPS6KA3;ALKBH5;RNF114;CIAO2A;TBC1D22A;GLUL;AGFG1;SOX5;UNC13C;PRKCI;OXSM;MRTFB;FRS2;PHKA1;ANK2;RC3H2;ATG12;UHMK1;PPP1R3C;PAPPA;SIK3;TCEANC2;SUCLG2;ATF7;TMEM126B;KCTD12;RIN2;MTMR1;MYCBP2;DCUN1D1;AGAP2;MTMR9;NEDD4L;SLAIN2;TMTC1;MTMR4;PLA2G6;TTBK2;DPH3;MCMBP;RAB11FIP4;GSTM1;PHC1;HOMER2;EDEM1;EXOC6B;BBIP1;PUM1;GNG12;PHC3;ACADSB;DCLK1…
Genes Down-Regulated In Vehicle Treated Wild Type Vs STHdhQ111 GSE129143	HDSigDB 2021	Union of DiestVMaleAccent3 and EstVMaleAccent3 (female low/KO downreg, male high/KO upreg)	284	3578	1.0944e-10	1.64678	1.09771e-11	41.5569	NCKAP1;GMFB;PANK3;PLEKHB2;WIPF2;ARAF;IPP;KLHDC7A;NUDT5;ALKBH8;UBE2L3;RPS6KA3;ALKBH5;RNF114;CIAO2A;TBC1D22A;GLUL;AGFG1;SOX5;UNC13C;PRKCI;OXSM;MRTFB;FRS2;PHKA1;ANK2;RC3H2;ATG12;UHMK1;PPP1R3C;PAPPA;SIK3;TCEANC2;SUCLG2;ATF7;TMEM126B;KCTD12;RIN2;MTMR1;MYCBP2;DCUN1D1;AGAP2;MTMR9;NEDD4L;SLAIN2;TMTC1;MTMR4;PLA2G6;TTBK2;DPH3;MCMBP;RAB11FIP4;GSTM1;PHC1;HOMER2;EDEM1;EXOC6B;BBIP1;PUM1;GNG12;PHC3;ACADSB;DCLK1…
Genes Changed In Striatal Cholinergic Interneurons Of zQ175DN Vs HdhQ20 PMID32681824	HDSigDB 2021	DiestVMaleAccent1 (Diestrus vs Male, female high/KO upreg, male low/KO downreg)	94	824	1.18888e-10	2.32331	1.19762e-11	58.4268	ITSN2;THRB;CLTC;SNX12;ADK;UBE3A;DUSP18;ZCCHC18;PPP1R9A;SMG7;CHD1;SYNE1;PCMTD2;DUSP11;SIPA1L1;SCMH1;KIF5A;RGS8;PDE8B;KPNA1;KDM6A;MEF2A;PPP1R16B;NSF;UNC13C;ZYG11B;RALGAPA1;DESI2;MRTFB;RFX3;SPTB;PJA2;PTBP3;BCR;SETBP1;TRAF3;PXDN;GPD1;SIK3;LCOR;SFT2D2;ATF6;JCAD;KDM7A;PAFAH1B1;ATP6V1A;INO80D;MAGED1;KMT2C;AGAP2;GMPS;AKAP5;FOXO3;NAPG;ACVR1C;PRR14L;POLR2B;SPOP;ABL2;TENT2;SKIL;RANBP2;EGR2;TCAF1;ACBD5;HOMER…
Genes Changed In Striatal Cholinergic Interneurons Of zQ175DN Vs HdhQ20 PMID32681824	HDSigDB 2021	Union of DiestVMaleAccent3 and EstVMaleAccent3 (female low/KO downreg, male high/KO upreg)	94	824	1.18888e-10	2.32331	1.19762e-11	58.4268	ITSN2;THRB;CLTC;SNX12;ADK;UBE3A;DUSP18;ZCCHC18;PPP1R9A;SMG7;CHD1;SYNE1;PCMTD2;DUSP11;SIPA1L1;SCMH1;KIF5A;RGS8;PDE8B;KPNA1;KDM6A;MEF2A;PPP1R16B;NSF;UNC13C;ZYG11B;RALGAPA1;DESI2;MRTFB;RFX3;SPTB;PJA2;PTBP3;BCR;SETBP1;TRAF3;PXDN;GPD1;SIK3;LCOR;SFT2D2;ATF6;JCAD;KDM7A;PAFAH1B1;ATP6V1A;INO80D;MAGED1;KMT2C;AGAP2;GMPS;AKAP5;FOXO3;NAPG;ACVR1C;PRR14L;POLR2B;SPOP;ABL2;TENT2;SKIL;RANBP2;EGR2;TCAF1;ACBD5;HOMER…
Expression In Cerebellum Of 12 Mon Ataxin-2 KO Spinocerebellar Ataxia 2 Mice GSE55177	HDSigDB 2021	DiestVMaleAccent1 (Diestrus vs Male, female high/KO upreg, male low/KO downreg)	279	3508	1.43637e-10	1.64715	1.45314e-11	41.1042	CHIC1;GMFB;PANK3;SPARC;MTRR;WIPF2;ALKBH5;RNF114;DPYSL3;CDK5RAP1;LUC7L;AGFG1;SOX5;MEF2A;UNC13C;PRKAB2;MEF2C;PHKA1;RC3H2;UHMK1;AR;SNHG14;MARF1;RUFY3;TCEANC2;SUCLG2;ATF7;TMEM126B;ALDH7A1;TMEM87A;NECAB1;ANAPC15;SDC4;STXBP4;MYCBP2;DCUN1D1;NOLC1;NEDD4L;PIK3R1;PLA2G6;TTBK2;PRKAR2A;DECR2;RIMKLB;ARGLU1;SCAI;SRPK2;CREBBP;FZD3;GSTM1;HOMER1;HOMER2;TIPARP;INTS2;EXOC6B;PRRC2C;IRF2BP2;HSPA12A;PUM1;MED13L;PEX5L;…
Expression In Cerebellum Of 12 Mon Ataxin-2 KO Spinocerebellar Ataxia 2 Mice GSE55177	HDSigDB 2021	Union of DiestVMaleAccent3 and EstVMaleAccent3 (female low/KO downreg, male high/KO upreg)	279	3508	1.43637e-10	1.64715	1.45314e-11	41.1042	CHIC1;GMFB;PANK3;SPARC;MTRR;WIPF2;ALKBH5;RNF114;DPYSL3;CDK5RAP1;LUC7L;AGFG1;SOX5;MEF2A;UNC13C;PRKAB2;MEF2C;PHKA1;RC3H2;UHMK1;AR;SNHG14;MARF1;RUFY3;TCEANC2;SUCLG2;ATF7;TMEM126B;ALDH7A1;TMEM87A;NECAB1;ANAPC15;SDC4;STXBP4;MYCBP2;DCUN1D1;NOLC1;NEDD4L;PIK3R1;PLA2G6;TTBK2;PRKAR2A;DECR2;RIMKLB;ARGLU1;SCAI;SRPK2;CREBBP;FZD3;GSTM1;HOMER1;HOMER2;TIPARP;INTS2;EXOC6B;PRRC2C;IRF2BP2;HSPA12A;PUM1;MED13L;PEX5L;…
Genes Down-Regulated In Ciliated Ependymal Cells Of HD Patients Vs Control PMID32681824	HDSigDB 2021	DiestVMaleAccent1 (Diestrus vs Male, female high/KO upreg, male low/KO downreg)	131	1315	1.55746e-10	2.02064	1.58237e-11	50.2523	SPARC;PLEKHB2;GDA;FRMPD4;CCNC;UBE3A;ABAT;IKZF2;ACTB;PREX2;SCP2;GPBP1;DPYSL3;SCMH1;PLCE1;PLXNC1;ARID2;SOX6;SOX5;NSF;MEF2C;EIF1AX;RALGAPA1;LMO3;MAGI2;RFX3;ANK2;SIK3;SUCLG2;MTMR1;STXBP4;MYCBP2;RASAL2;IQGAP2;DNAJC27;FUT9;MAP2;DHX36;STXBP5;RIMKLB;SKIL;ZRANB3;FZD3;ANKRD26;PHC1;DTNA;CPSF6;DENND4A;TIPARP;KLHL28;OGA;SMARCA5;IRF2BP2;HSPA2;DCLK1;AZIN1;PUM2;NR4A2;ARHGAP32;STK24;NBEA;CNOT1;DMXL1;TCF4;RGL1;CPE…
Genes Down-Regulated In Ciliated Ependymal Cells Of HD Patients Vs Control PMID32681824	HDSigDB 2021	Union of DiestVMaleAccent3 and EstVMaleAccent3 (female low/KO downreg, male high/KO upreg)	131	1315	1.55746e-10	2.02064	1.58237e-11	50.2523	SPARC;PLEKHB2;GDA;FRMPD4;CCNC;UBE3A;ABAT;IKZF2;ACTB;PREX2;SCP2;GPBP1;DPYSL3;SCMH1;PLCE1;PLXNC1;ARID2;SOX6;SOX5;NSF;MEF2C;EIF1AX;RALGAPA1;LMO3;MAGI2;RFX3;ANK2;SIK3;SUCLG2;MTMR1;STXBP4;MYCBP2;RASAL2;IQGAP2;DNAJC27;FUT9;MAP2;DHX36;STXBP5;RIMKLB;SKIL;ZRANB3;FZD3;ANKRD26;PHC1;DTNA;CPSF6;DENND4A;TIPARP;KLHL28;OGA;SMARCA5;IRF2BP2;HSPA2;DCLK1;AZIN1;PUM2;NR4A2;ARHGAP32;STK24;NBEA;CNOT1;DMXL1;TCF4;RGL1;CPE…
Genes Changed In Cyproheptadine Treated STHdhQ111 Vs Control GSE129143	HDSigDB 2021	DiestVMaleAccent1 (Diestrus vs Male, female high/KO upreg, male low/KO downreg)	321	4181	1.63043e-10	1.6034	1.66357e-11	39.7956	CYFIP1;AHCYL1;TRIO;MTRR;PLEKHB2;WIPF2;NUDT5;ALKBH8;DCAF6;ALKBH5;SYNGAP1;SOX5;PRKCI;OXSM;MRTFB;FRS2;ANK2;ANK3;THAP2;MTURN;BCR;MARF1;PPP1R3C;PAPPA;SIK3;SUCLG2;KCTD12;ZFPM2;ATF6;MTMR1;TMEM87A;LXN;EPAS1;AGAP2;NOLC1;BAZ2A;PIK3R1;MTMR4;SMIM7;TTBK2;EPB41L5;MAP2;PRKAR2A;RAD21;DPH3;DECR2;RAB11FIP4;PCK2;ZRANB3;CREBBP;GSTM1;EGR3;PHC1;HOMER1;EXOC6B;IRF2BP2;PUM1;PHC3;PRDX6;ACADSB;PBX1;DCLK1;MED13L;POU6F1;PUM2…
Genes Changed In Cyproheptadine Treated STHdhQ111 Vs Control GSE129143	HDSigDB 2021	Union of DiestVMaleAccent3 and EstVMaleAccent3 (female low/KO downreg, male high/KO upreg)	321	4181	1.63043e-10	1.6034	1.66357e-11	39.7956	CYFIP1;AHCYL1;TRIO;MTRR;PLEKHB2;WIPF2;NUDT5;ALKBH8;DCAF6;ALKBH5;SYNGAP1;SOX5;PRKCI;OXSM;MRTFB;FRS2;ANK2;ANK3;THAP2;MTURN;BCR;MARF1;PPP1R3C;PAPPA;SIK3;SUCLG2;KCTD12;ZFPM2;ATF6;MTMR1;TMEM87A;LXN;EPAS1;AGAP2;NOLC1;BAZ2A;PIK3R1;MTMR4;SMIM7;TTBK2;EPB41L5;MAP2;PRKAR2A;RAD21;DPH3;DECR2;RAB11FIP4;PCK2;ZRANB3;CREBBP;GSTM1;EGR3;PHC1;HOMER1;EXOC6B;IRF2BP2;PUM1;PHC3;PRDX6;ACADSB;PBX1;DCLK1;MED13L;POU6F1;PUM2…
Genes Down-Regulated In Neuro2a Htt72Q (72Q-ni+72Q-i) Vs Htt25Q (25Q-ni) PMID28743452	HDSigDB 2021	DiestVMaleAccent1 (Diestrus vs Male, female high/KO upreg, male low/KO downreg)	186	2102	2.0846e-10	1.80182	2.13597e-11	44.2698	ANKRD13C;OTUD4;IPO11;GMFB;PANK3;UBE3C;CSE1L;NAB1;FMR1;CCNC;UBE3A;PRDM2;OGDHL;PEG13;PLCE1;PLXNC1;CIAO2A;TRAPPC13;ARID2;NSF;MED1;PRKCI;EIF1AX;MMGT1;RALGAPA1;TMOD2;SOX11;TUG1;RC3H2;THAP2;DCTD;MOSMO;SNHG14;MARF1;LIX1;TBL1XR1;GPD1;SMS;UBE2V2;ANKRD40;RELCH;XIST;MTMR1;DNMT1;SET;INO80D;ANAPC15;KMT2A;CUL5;ANKRD12;DCUN1D1;NOLC1;PDS5B;RASAL2;IQGAP2;MACROH2A1;KIF3B;PRKAR2A;RAD21;TASOR;DHX36;G3BP2;MCMBP;ARGLU…
Genes Down-Regulated In Neuro2a Htt72Q (72Q-ni+72Q-i) Vs Htt25Q (25Q-ni) PMID28743452	HDSigDB 2021	Union of DiestVMaleAccent3 and EstVMaleAccent3 (female low/KO downreg, male high/KO upreg)	186	2102	2.0846e-10	1.80182	2.13597e-11	44.2698	ANKRD13C;OTUD4;IPO11;GMFB;PANK3;UBE3C;CSE1L;NAB1;FMR1;CCNC;UBE3A;PRDM2;OGDHL;PEG13;PLCE1;PLXNC1;CIAO2A;TRAPPC13;ARID2;NSF;MED1;PRKCI;EIF1AX;MMGT1;RALGAPA1;TMOD2;SOX11;TUG1;RC3H2;THAP2;DCTD;MOSMO;SNHG14;MARF1;LIX1;TBL1XR1;GPD1;SMS;UBE2V2;ANKRD40;RELCH;XIST;MTMR1;DNMT1;SET;INO80D;ANAPC15;KMT2A;CUL5;ANKRD12;DCUN1D1;NOLC1;PDS5B;RASAL2;IQGAP2;MACROH2A1;KIF3B;PRKAR2A;RAD21;TASOR;DHX36;G3BP2;MCMBP;ARGLU…
Expression In Quadriceps Muscle Of HSALR 20B Myotonic Dystrophy Mice (MOE430B Array) GSE14691	HDSigDB 2021	DiestVMaleAccent1 (Diestrus vs Male, female high/KO upreg, male low/KO downreg)	61	438	2.08907e-10	2.88166	2.15207e-11	70.7794	CCDC71L;AHCTF1;RSF1;PRDM2;METTL11B;CHD1;CDC73;TRIM2;NCS1;PPFIA1;IDS;ARID2;PRKAB2;EIF1AX;VPS33A;STRBP;VPS13D;TSC22D2;PGM2L1;ASRGL1;KCTD6;PHF20L1;UBE2V2;HECA;ANAPC1;JCAD;NUFIP2;MAOB;RNMT;STXBP4;CAMK2A;NEDD4L;TMTC1;RASAL2;PDS5B;ASAP2;PPM1F;ZBTB41;BTAF1;FAM168A;FAM120C;BTBD3;RICTOR;STXBP5;TPPP;RAP1GAP2;HOMER1;PCGF3;SORBS2;TMEM64;HOOK3;MIB1;PDP1;MKLN1;DIAPH2;GNAL;PDE10A;ABI2;UBE2N;SPIRE1;PLCD4
HD Markers In Human Fibroblasts GSE45516	HDSigDB 2021	DiestVMaleAccent1 (Diestrus vs Male, female high/KO upreg, male low/KO downreg)	200	2309	2.08907e-10	1.76717	2.15862e-11	43.4	NCKAP1;CHIC1;GMFB;CCNC;IKZF2;RPS6KA3;ALKBH5;SCP2;SOX6;TBC1D22A;MEF2A;PRKAB2;ATG12;AR;XRN1;RUFY3;PAPPA;ATF6;CLOCK;STXBP4;MYCBP2;MTMR9;TTBK2;RAD21;DHX36;SRPK2;EGR3;SMARCA5;IRF2BP2;PHC3;ACADSB;PUM2;CCDC88A;AGO4;EZH1;AHCTF1;BTG1;SNX12;CROT;ARHGAP5;LYST;NIPBL;MED13;TRIM2;ZMYM6;REV3L;IDS;ACADM;SPTAN1;TEAD1;UPF2;NCOA2;ZFR;TSC22D2;FAM126B;PGM2L1;PHF20L1;VAMP7;PAFAH1B1;GAS7;NAPB;STAU2;RNMT;USO1;RIDA;SH3BG…
Expression In Quadriceps Muscle Of HSALR 20B Myotonic Dystrophy Mice (MOE430B Array) GSE14691	HDSigDB 2021	Union of DiestVMaleAccent3 and EstVMaleAccent3 (female low/KO downreg, male high/KO upreg)	61	438	2.08907e-10	2.88166	2.15207e-11	70.7794	CCDC71L;AHCTF1;RSF1;PRDM2;METTL11B;CHD1;CDC73;TRIM2;NCS1;PPFIA1;IDS;ARID2;PRKAB2;EIF1AX;VPS33A;STRBP;VPS13D;TSC22D2;PGM2L1;ASRGL1;KCTD6;PHF20L1;UBE2V2;HECA;ANAPC1;JCAD;NUFIP2;MAOB;RNMT;STXBP4;CAMK2A;NEDD4L;TMTC1;RASAL2;PDS5B;ASAP2;PPM1F;ZBTB41;BTAF1;FAM168A;FAM120C;BTBD3;RICTOR;STXBP5;TPPP;RAP1GAP2;HOMER1;PCGF3;SORBS2;TMEM64;HOOK3;MIB1;PDP1;MKLN1;DIAPH2;GNAL;PDE10A;ABI2;UBE2N;SPIRE1;PLCD4
HD Markers In Human Fibroblasts GSE45516	HDSigDB 2021	Union of DiestVMaleAccent3 and EstVMaleAccent3 (female low/KO downreg, male high/KO upreg)	200	2309	2.08907e-10	1.76717	2.15862e-11	43.4	NCKAP1;CHIC1;GMFB;CCNC;IKZF2;RPS6KA3;ALKBH5;SCP2;SOX6;TBC1D22A;MEF2A;PRKAB2;ATG12;AR;XRN1;RUFY3;PAPPA;ATF6;CLOCK;STXBP4;MYCBP2;MTMR9;TTBK2;RAD21;DHX36;SRPK2;EGR3;SMARCA5;IRF2BP2;PHC3;ACADSB;PUM2;CCDC88A;AGO4;EZH1;AHCTF1;BTG1;SNX12;CROT;ARHGAP5;LYST;NIPBL;MED13;TRIM2;ZMYM6;REV3L;IDS;ACADM;SPTAN1;TEAD1;UPF2;NCOA2;ZFR;TSC22D2;FAM126B;PGM2L1;PHF20L1;VAMP7;PAFAH1B1;GAS7;NAPB;STAU2;RNMT;USO1;RIDA;SH3BG…
Mouse 263 SUB up	Allen scRNA 2021	DiestVMaleAccent1 (Diestrus vs Male, female high/KO upreg, male low/KO downreg)	56	379	2.15853e-10	3.08192	1.3926e-11	77.0396	ANKRD13C;CYFIP1;TOP2B;ZFP644;AHCTF1;ZFP445;PANK3;USP31;NAB1;IKZF2;IPO7;CDC73;PCMTD2;COL4A3BP;RNF114;MED13;CHORDC1;GPBP1;CDKL4;ZFP654;VPS13C;USP45;DYRK1A;ZFP91;CKAP5;LZTFL1;RNF41;BCR;RALGAPB;WDR82;UBE2V2;HECA;MTMR1;DCUN1D1;GM38393;ARHGAP12;RAB21;RMND5A;KCTD20;GM20300;EIF2S3X;TRP53BP1;ZFP260;EIF4B;SASH1;ACBD5;IQSEC3;NAP1L2;KLHL24;ACADSB;FOSL2;POU6F1;TTC39B;UFM1;AGO1;DNAL1
Mouse 263 SUB up	Allen scRNA 2021	EstVMaleAccent1 (Estrus vs Male, female high/KO upreg, male low/KO downreg)	56	379	2.15853e-10	3.08192	1.3926e-11	77.0396	ANKRD13C;CYFIP1;TOP2B;ZFP644;AHCTF1;ZFP445;PANK3;USP31;NAB1;IKZF2;IPO7;CDC73;PCMTD2;COL4A3BP;RNF114;MED13;CHORDC1;GPBP1;CDKL4;ZFP654;VPS13C;USP45;DYRK1A;ZFP91;CKAP5;LZTFL1;RNF41;BCR;RALGAPB;WDR82;UBE2V2;HECA;MTMR1;DCUN1D1;GM38393;ARHGAP12;RAB21;RMND5A;KCTD20;GM20300;EIF2S3X;TRP53BP1;ZFP260;EIF4B;SASH1;ACBD5;IQSEC3;NAP1L2;KLHL24;ACADSB;FOSL2;POU6F1;TTC39B;UFM1;AGO1;DNAL1
Mouse 263 SUB up	Allen scRNA 2021	DiestVMaleAccent3 (Diestrus vs Male, female low/KO downreg, male high/KO upreg)	56	379	2.15853e-10	3.08192	1.3926e-11	77.0396	ANKRD13C;CYFIP1;TOP2B;ZFP644;AHCTF1;ZFP445;PANK3;USP31;NAB1;IKZF2;IPO7;CDC73;PCMTD2;COL4A3BP;RNF114;MED13;CHORDC1;GPBP1;CDKL4;ZFP654;VPS13C;USP45;DYRK1A;ZFP91;CKAP5;LZTFL1;RNF41;BCR;RALGAPB;WDR82;UBE2V2;HECA;MTMR1;DCUN1D1;GM38393;ARHGAP12;RAB21;RMND5A;KCTD20;GM20300;EIF2S3X;TRP53BP1;ZFP260;EIF4B;SASH1;ACBD5;IQSEC3;NAP1L2;KLHL24;ACADSB;FOSL2;POU6F1;TTC39B;UFM1;AGO1;DNAL1
Mouse 263 SUB up	Allen scRNA 2021	EstVMaleAccent3 (Estrus vs Male, female low/KO downreg, male high/KO upreg)	56	379	2.15853e-10	3.08192	1.3926e-11	77.0396	ANKRD13C;CYFIP1;TOP2B;ZFP644;AHCTF1;ZFP445;PANK3;USP31;NAB1;IKZF2;IPO7;CDC73;PCMTD2;COL4A3BP;RNF114;MED13;CHORDC1;GPBP1;CDKL4;ZFP654;VPS13C;USP45;DYRK1A;ZFP91;CKAP5;LZTFL1;RNF41;BCR;RALGAPB;WDR82;UBE2V2;HECA;MTMR1;DCUN1D1;GM38393;ARHGAP12;RAB21;RMND5A;KCTD20;GM20300;EIF2S3X;TRP53BP1;ZFP260;EIF4B;SASH1;ACBD5;IQSEC3;NAP1L2;KLHL24;ACADSB;FOSL2;POU6F1;TTC39B;UFM1;AGO1;DNAL1
Mouse 263 SUB up	Allen scRNA 2021	Union of DiestVMaleAccent1 and EstVMaleAccent1 (female high/KO upreg, male low/KO downreg)	56	379	2.15853e-10	3.08192	1.3926e-11	77.0396	ANKRD13C;CYFIP1;TOP2B;ZFP644;AHCTF1;ZFP445;PANK3;USP31;NAB1;IKZF2;IPO7;CDC73;PCMTD2;COL4A3BP;RNF114;MED13;CHORDC1;GPBP1;CDKL4;ZFP654;VPS13C;USP45;DYRK1A;ZFP91;CKAP5;LZTFL1;RNF41;BCR;RALGAPB;WDR82;UBE2V2;HECA;MTMR1;DCUN1D1;GM38393;ARHGAP12;RAB21;RMND5A;KCTD20;GM20300;EIF2S3X;TRP53BP1;ZFP260;EIF4B;SASH1;ACBD5;IQSEC3;NAP1L2;KLHL24;ACADSB;FOSL2;POU6F1;TTC39B;UFM1;AGO1;DNAL1
Mouse 263 SUB up	Allen scRNA 2021	Union of DiestVMaleAccent3 and EstVMaleAccent3 (female low/KO downreg, male high/KO upreg)	56	379	2.15853e-10	3.08192	1.3926e-11	77.0396	ANKRD13C;CYFIP1;TOP2B;ZFP644;AHCTF1;ZFP445;PANK3;USP31;NAB1;IKZF2;IPO7;CDC73;PCMTD2;COL4A3BP;RNF114;MED13;CHORDC1;GPBP1;CDKL4;ZFP654;VPS13C;USP45;DYRK1A;ZFP91;CKAP5;LZTFL1;RNF41;BCR;RALGAPB;WDR82;UBE2V2;HECA;MTMR1;DCUN1D1;GM38393;ARHGAP12;RAB21;RMND5A;KCTD20;GM20300;EIF2S3X;TRP53BP1;ZFP260;EIF4B;SASH1;ACBD5;IQSEC3;NAP1L2;KLHL24;ACADSB;FOSL2;POU6F1;TTC39B;UFM1;AGO1;DNAL1
Genes Up-Regulated In The Striatum Of zQ175 Neo- Mice Vs WT GSE123657	HDSigDB 2021	DiestVMaleAccent1 (Diestrus vs Male, female high/KO upreg, male low/KO downreg)	165	1799	2.20906e-10	1.86261	2.29215e-11	45.6321	DGKG;CCDC71L;CYFIP1;OXNAD1;MTRR;GDA;NEXMIF;CSE1L;IPP;UBE3A;IKZF2;FGF1;ALKBH8;UBE2L3;ATCAY;GNPTAB;DPYSL5;DPYSL3;EP300;KPNA4;TRAPPC13;ARID2;SLC25A44;PRKAB2;PHYH;EIF1AX;RALGAPA1;DYRK1A;FRS2;SOX11;MYT1;UHMK1;PYGO1;AR;SNHG14;ARMCX2;RUFY3;SMS;TMEM126B;SREK1;ANAPC1;ATP6V1A;CUL5;MAX;MAGED1;KMT2C;MYCBP2;ANKRD12;GMPS;CREBL2;TMTC1;PIK3R1;RASAL2;NYAP2;PLCXD2;GIGYF2;MAP2;PRKAR2A;DPH3;ZKSCAN5;STXBP5;SRGAP3;LON…
Genes Up-Regulated In The Striatum Of zQ175 Neo- Mice Vs WT GSE123657	HDSigDB 2021	Union of DiestVMaleAccent3 and EstVMaleAccent3 (female low/KO downreg, male high/KO upreg)	165	1799	2.20906e-10	1.86261	2.29215e-11	45.6321	DGKG;CCDC71L;CYFIP1;OXNAD1;MTRR;GDA;NEXMIF;CSE1L;IPP;UBE3A;IKZF2;FGF1;ALKBH8;UBE2L3;ATCAY;GNPTAB;DPYSL5;DPYSL3;EP300;KPNA4;TRAPPC13;ARID2;SLC25A44;PRKAB2;PHYH;EIF1AX;RALGAPA1;DYRK1A;FRS2;SOX11;MYT1;UHMK1;PYGO1;AR;SNHG14;ARMCX2;RUFY3;SMS;TMEM126B;SREK1;ANAPC1;ATP6V1A;CUL5;MAX;MAGED1;KMT2C;MYCBP2;ANKRD12;GMPS;CREBL2;TMTC1;PIK3R1;RASAL2;NYAP2;PLCXD2;GIGYF2;MAP2;PRKAR2A;DPH3;ZKSCAN5;STXBP5;SRGAP3;LON…
PD Down-Regulated Genes In Human Prefrontal Cortex PMID29375298	HDSigDB 2021	DiestVMaleAccent1 (Diestrus vs Male, female high/KO upreg, male low/KO downreg)	102	937	2.35411e-10	2.20883	2.45284e-11	53.9643	ANKRD13C;OXNAD1;PANK3;PLEKHB2;FRMPD4;IPP;UBE3A;ALKBH8;RIMS1;PLXNC1;TRAPPC13;KPNA1;CALN1;AGFG1;PRKCI;TMOD2;MAGI2;ANK2;ANK3;LARP4B;RALGAPB;TBL1XR1;RUFY3;DOK6;ATF6;CLOCK;ANAPC1;CUL5;MYCBP2;GMPS;MTMR9;PIK3R1;RASAL2;MTMR4;DNAJC27;MAP2;DHX36;SRPK2;ZRANB3;EXOC6B;TRAPPC8;ACADSB;PBX1;DCLK1;AZIN1;DLG2;NBEA;DMXL1;KYAT3;NF1;GSK3B;HBS1L;TOP2B;NRSN1;RASGRF1;CLTC;MTR;WDR44;SCRN3;PSD3;HMG20A;CEP170;ARIH1;BBS4;ZY…
PD Down-Regulated Genes In Human Prefrontal Cortex PMID29375298	HDSigDB 2021	Union of DiestVMaleAccent3 and EstVMaleAccent3 (female low/KO downreg, male high/KO upreg)	102	937	2.35411e-10	2.20883	2.45284e-11	53.9643	ANKRD13C;OXNAD1;PANK3;PLEKHB2;FRMPD4;IPP;UBE3A;ALKBH8;RIMS1;PLXNC1;TRAPPC13;KPNA1;CALN1;AGFG1;PRKCI;TMOD2;MAGI2;ANK2;ANK3;LARP4B;RALGAPB;TBL1XR1;RUFY3;DOK6;ATF6;CLOCK;ANAPC1;CUL5;MYCBP2;GMPS;MTMR9;PIK3R1;RASAL2;MTMR4;DNAJC27;MAP2;DHX36;SRPK2;ZRANB3;EXOC6B;TRAPPC8;ACADSB;PBX1;DCLK1;AZIN1;DLG2;NBEA;DMXL1;KYAT3;NF1;GSK3B;HBS1L;TOP2B;NRSN1;RASGRF1;CLTC;MTR;WDR44;SCRN3;PSD3;HMG20A;CEP170;ARIH1;BBS4;ZY…
Genes Up-Regulated In R6/1 Treated With PLX3397 Vs Vehicle Treated WT Mice GSE136158	HDSigDB 2021	DiestVMaleAccent1 (Diestrus vs Male, female high/KO upreg, male low/KO downreg)	61	440	2.4931e-10	2.86615	2.60843e-11	69.8471	RAB3C;TOP2B;CHIC1;DDX3X;DGKB;NEXMIF;USP34;ABAT;RSF1;UBE3A;PREX2;DOCK10;DSTYK;MED13;FSD1L;CHORDC1;ZMYM6;REV3L;ARFGEF3;KDM6A;UNC13C;CNOT6L;PEG3;FAM126B;SNHG14;DOK6;NECAB1;PDS5B;MED12L;TTBK2;ARHGAP12;FGD4;BCLAF1;SV2C;TASOR;PAK3;SCAI;MAP3K2;RANBP2;ANKRD26;ACBD5;SLC35A3;NEBL;CEP350;MGA;GAD1;KLHL28;SMARCA5;WWP1;RAB27B;HOOK3;TMEM196;MYO9A;ST18;ETNPPL;PLCXD3;AGO3;TAOK1;DMXL1;PWWP3B;PTPN4
Genes Up-Regulated In R6/1 Treated With PLX3397 Vs Vehicle Treated WT Mice GSE136158	HDSigDB 2021	Union of DiestVMaleAccent3 and EstVMaleAccent3 (female low/KO downreg, male high/KO upreg)	61	440	2.4931e-10	2.86615	2.60843e-11	69.8471	RAB3C;TOP2B;CHIC1;DDX3X;DGKB;NEXMIF;USP34;ABAT;RSF1;UBE3A;PREX2;DOCK10;DSTYK;MED13;FSD1L;CHORDC1;ZMYM6;REV3L;ARFGEF3;KDM6A;UNC13C;CNOT6L;PEG3;FAM126B;SNHG14;DOK6;NECAB1;PDS5B;MED12L;TTBK2;ARHGAP12;FGD4;BCLAF1;SV2C;TASOR;PAK3;SCAI;MAP3K2;RANBP2;ANKRD26;ACBD5;SLC35A3;NEBL;CEP350;MGA;GAD1;KLHL28;SMARCA5;WWP1;RAB27B;HOOK3;TMEM196;MYO9A;ST18;ETNPPL;PLCXD3;AGO3;TAOK1;DMXL1;PWWP3B;PTPN4
Expression In Cerebellum Of 24 Mon Ataxin-2 KO Spinocerebellar Ataxia 2 Mice GSE55177	HDSigDB 2021	DiestVMaleAccent1 (Diestrus vs Male, female high/KO upreg, male low/KO downreg)	66	497	2.5833e-10	2.73241	2.71397e-11	66.4796	ANKRD13C;RERE;KDM5B;CHIC1;CDKN1B;FAM107A;PTEN;KANTR;UBE3A;PRL;ARHGAP5;RO60;ZMIZ1;TRIM2;RGS8;FAM81A;PPP1R16B;NSF;PRKAB2;SGIP1;ZFR;ANK2;ANK3;CKAP5;UHMK1;DCTD;AR;ALS2;PXDN;ELMO2;ALDOC;FAM32A;BCAT1;ALDH7A1;SHANK2;TMEM87A;MYCBP2;DCUN1D1;SLC1A2;NEDD4L;FOXO3;PPM1E;PLCXD2;STRN3;FAM168A;MAP2;LRRC4C;PAK3;ARFGEF1;ATF7IP;OGA;BTBD7;SORBS2;ARHGAP26;DCLK1;FOSL2;TTC39B;ETNPPL;ARHGAP32;DIAPH2;GNAL;PAN3;ABI2;CAMK4…
Expression In Cerebellum Of 24 Mon Ataxin-2 KO Spinocerebellar Ataxia 2 Mice GSE55177	HDSigDB 2021	Union of DiestVMaleAccent3 and EstVMaleAccent3 (female low/KO downreg, male high/KO upreg)	66	497	2.5833e-10	2.73241	2.71397e-11	66.4796	ANKRD13C;RERE;KDM5B;CHIC1;CDKN1B;FAM107A;PTEN;KANTR;UBE3A;PRL;ARHGAP5;RO60;ZMIZ1;TRIM2;RGS8;FAM81A;PPP1R16B;NSF;PRKAB2;SGIP1;ZFR;ANK2;ANK3;CKAP5;UHMK1;DCTD;AR;ALS2;PXDN;ELMO2;ALDOC;FAM32A;BCAT1;ALDH7A1;SHANK2;TMEM87A;MYCBP2;DCUN1D1;SLC1A2;NEDD4L;FOXO3;PPM1E;PLCXD2;STRN3;FAM168A;MAP2;LRRC4C;PAK3;ARFGEF1;ATF7IP;OGA;BTBD7;SORBS2;ARHGAP26;DCLK1;FOSL2;TTC39B;ETNPPL;ARHGAP32;DIAPH2;GNAL;PAN3;ABI2;CAMK4…
Genes Changed In Cerebellum Of 12 Week Old ATXN1[82Q] Vs WT GSE122099	HDSigDB 2021	DiestVMaleAccent1 (Diestrus vs Male, female high/KO upreg, male low/KO downreg)	138	1422	2.59881e-10	1.96594	2.7415e-11	47.8115	CYFIP2;DGKG;CYFIP1;ALDH1L1;TRIO;DGKD;ZFYVE9;NAB1;SLA;ABAT;IPO5;PREX2;RIMS1;RPS6KA3;PPP4R4;DPYSL3;KIF5A;PPFIA1;RGS8;PPFIA4;GLUL;AGFG1;PPP1R16B;PAQR8;UNC13C;PRKAB2;PRKCI;DIO2;MMD2;ANK2;IPCEF1;PPP1R3C;LIX1;PAPPA;EEF1A2;GPD1;SUCLG2;ELMO2;ANKRD40;KCTD12;RIN2;SDC4;ABHD4;GLIS3;SLC1A2;NEDD4L;LIN7A;PIK3R1;IQGAP2;MACROH2A1;CAMSAP2;LARP1;BTBD3;ZMAT4;RAB11FIP4;NEBL;HSPA12A;ARHGAP26;PRDX6;ST18;MFHAS1;ARHGAP32…
Genes Changed In Cerebellum Of 12 Week Old ATXN1[82Q] Vs WT GSE122099	HDSigDB 2021	Union of DiestVMaleAccent3 and EstVMaleAccent3 (female low/KO downreg, male high/KO upreg)	138	1422	2.59881e-10	1.96594	2.7415e-11	47.8115	CYFIP2;DGKG;CYFIP1;ALDH1L1;TRIO;DGKD;ZFYVE9;NAB1;SLA;ABAT;IPO5;PREX2;RIMS1;RPS6KA3;PPP4R4;DPYSL3;KIF5A;PPFIA1;RGS8;PPFIA4;GLUL;AGFG1;PPP1R16B;PAQR8;UNC13C;PRKAB2;PRKCI;DIO2;MMD2;ANK2;IPCEF1;PPP1R3C;LIX1;PAPPA;EEF1A2;GPD1;SUCLG2;ELMO2;ANKRD40;KCTD12;RIN2;SDC4;ABHD4;GLIS3;SLC1A2;NEDD4L;LIN7A;PIK3R1;IQGAP2;MACROH2A1;CAMSAP2;LARP1;BTBD3;ZMAT4;RAB11FIP4;NEBL;HSPA12A;ARHGAP26;PRDX6;ST18;MFHAS1;ARHGAP32…
Genes Changed In Oligodendrocytes Of HD Patients Vs Control PMID32681824	HDSigDB 2021	DiestVMaleAccent1 (Diestrus vs Male, female high/KO upreg, male low/KO downreg)	80	663	2.68582e-10	2.46165	2.84491e-11	59.776	USP31;DGKB;USP32;CTNND2;RASGRF1;USP34;ARRB1;PPP1R9A;ACTB;DOCK10;MED13;SIPA1L1;XPO1;DPYSL5;TRIM2;PSD3;CHORDC1;CEP170;PHACTR1;GLUL;ARFGEF3;SGIP1;MAGI2;DYRK1A;RFX3;ANK2;ASH1L;ANK3;ARID1B;GREM1;TANC1;RUFY3;SELENOP;SIK3;ACSBG1;BCAT1;GAS7;NECAB1;INO80D;NUFIP2;DDX24;ABHD2;KMT2C;PPM1K;PDS5B;PDS5A;ATXN1;FUT9;LRRC4C;ARGLU1;ZKSCAN1;CLASP1;SASH1;CLASP2;TCF7L2;CREBBP;KCNIP3;EXOC6B;PRRC2C;KLHL3;SORBS1;HSPA2;KL…
Genes Changed In Oligodendrocytes Of HD Patients Vs Control PMID32681824	HDSigDB 2021	Union of DiestVMaleAccent3 and EstVMaleAccent3 (female low/KO downreg, male high/KO upreg)	80	663	2.68582e-10	2.46165	2.84491e-11	59.776	USP31;DGKB;USP32;CTNND2;RASGRF1;USP34;ARRB1;PPP1R9A;ACTB;DOCK10;MED13;SIPA1L1;XPO1;DPYSL5;TRIM2;PSD3;CHORDC1;CEP170;PHACTR1;GLUL;ARFGEF3;SGIP1;MAGI2;DYRK1A;RFX3;ANK2;ASH1L;ANK3;ARID1B;GREM1;TANC1;RUFY3;SELENOP;SIK3;ACSBG1;BCAT1;GAS7;NECAB1;INO80D;NUFIP2;DDX24;ABHD2;KMT2C;PPM1K;PDS5B;PDS5A;ATXN1;FUT9;LRRC4C;ARGLU1;ZKSCAN1;CLASP1;SASH1;CLASP2;TCF7L2;CREBBP;KCNIP3;EXOC6B;PRRC2C;KLHL3;SORBS1;HSPA2;KL…
Genes Up-Regulated In HD Neurons Treated With ZFP-C Vs Control GSE127821	HDSigDB 2021	DiestVMaleAccent1 (Diestrus vs Male, female high/KO upreg, male low/KO downreg)	120	1178	2.82934e-10	2.06275	3.00916e-11	49.9737	NCKAP1;OXNAD1;CSE1L;PRDM2;ABAT;IPO5;PTAR1;GPBP1;CHORDC1;KPNA1;PAQR8;NSF;SAP30BP;MAGI2;PHKA1;DCTD;MARF1;TBL1XR1;XRN2;SMS;HECA;SREK1;ALDH7A1;ANAPC1;LRRC58;ANKRD12;GLIS3;GMPS;MTMR9;NEDD4L;PDS5B;IQGAP2;PDS5A;ARHGAP12;RAD21;UBR5;G3BP2;EIF4EBP2;ARGLU1;RAB11FIP4;SCAI;SRPK2;FZD3;ANKRD26;PHC1;OGA;IRF2BP2;TRAPPC8;EEF2;ACADSB;AZIN1;FER;APPBP2;AGO4;UBA3;BCL2;MAGED2;PICALM;RERE;HBS1L;AHCTF1;DDX3X;CLTC;LDB2;AR…
Genes Up-Regulated In HD Neurons Treated With ZFP-C Vs Control GSE127821	HDSigDB 2021	Union of DiestVMaleAccent3 and EstVMaleAccent3 (female low/KO downreg, male high/KO upreg)	120	1178	2.82934e-10	2.06275	3.00916e-11	49.9737	NCKAP1;OXNAD1;CSE1L;PRDM2;ABAT;IPO5;PTAR1;GPBP1;CHORDC1;KPNA1;PAQR8;NSF;SAP30BP;MAGI2;PHKA1;DCTD;MARF1;TBL1XR1;XRN2;SMS;HECA;SREK1;ALDH7A1;ANAPC1;LRRC58;ANKRD12;GLIS3;GMPS;MTMR9;NEDD4L;PDS5B;IQGAP2;PDS5A;ARHGAP12;RAD21;UBR5;G3BP2;EIF4EBP2;ARGLU1;RAB11FIP4;SCAI;SRPK2;FZD3;ANKRD26;PHC1;OGA;IRF2BP2;TRAPPC8;EEF2;ACADSB;AZIN1;FER;APPBP2;AGO4;UBA3;BCL2;MAGED2;PICALM;RERE;HBS1L;AHCTF1;DDX3X;CLTC;LDB2;AR…
Differentially Expressed Soluble Proteins In Cerebral Cortex Of 8 Wk R6/2 Mice PXD004973	HDSigDB 2021	DiestVMaleAccent1 (Diestrus vs Male, female high/KO upreg, male low/KO downreg)	148	1565	3.02414e-10	1.91598	3.22941e-11	46.2826	ITSN2;AHCYL1;TRRAP;DGKB;CTNND2;ARAF;FGF1;ACTB;UBE2L3;RIMS1;ATCAY;DPYSL5;PPFIA1;STK32B;GLUL;FAM81A;AGFG1;MEF2A;NSF;VPS33A;TMOD2;PHKA1;ANK2;ANK3;HPCAL4;KCTD6;STX1B;EEF1A2;GPD1;SMS;SIK3;SUCLG2;ANAPC1;ATP6V1A;MTMR1;LXN;SET;MAOB;GLO1;PDE1A;SLC1A2;LIN7A;TMTC1;PIK3R1;MAP2;ZMAT4;ABL2;GSTM1;HOMER1;OGA;DSTN;PRRC2C;RAB27B;HOOK3;HSPA2;CORO2A;HSPA12A;PRDX6;ACADSB;PEX5L;EHD3;GNAL;NBEA;AGO2;NMT1;ACO2;RGL1;ACBD3…
Differentially Expressed Soluble Proteins In Cerebral Cortex Of 8 Wk R6/2 Mice PXD004973	HDSigDB 2021	Union of DiestVMaleAccent3 and EstVMaleAccent3 (female low/KO downreg, male high/KO upreg)	148	1565	3.02414e-10	1.91598	3.22941e-11	46.2826	ITSN2;AHCYL1;TRRAP;DGKB;CTNND2;ARAF;FGF1;ACTB;UBE2L3;RIMS1;ATCAY;DPYSL5;PPFIA1;STK32B;GLUL;FAM81A;AGFG1;MEF2A;NSF;VPS33A;TMOD2;PHKA1;ANK2;ANK3;HPCAL4;KCTD6;STX1B;EEF1A2;GPD1;SMS;SIK3;SUCLG2;ANAPC1;ATP6V1A;MTMR1;LXN;SET;MAOB;GLO1;PDE1A;SLC1A2;LIN7A;TMTC1;PIK3R1;MAP2;ZMAT4;ABL2;GSTM1;HOMER1;OGA;DSTN;PRRC2C;RAB27B;HOOK3;HSPA2;CORO2A;HSPA12A;PRDX6;ACADSB;PEX5L;EHD3;GNAL;NBEA;AGO2;NMT1;ACO2;RGL1;ACBD3…
Influence Of Cugbp1 KO On Expression In C2C12 Mouse Cells GSE29990	HDSigDB 2021	DiestVMaleAccent1 (Diestrus vs Male, female high/KO upreg, male low/KO downreg)	289	3692	3.08686e-10	1.62069	3.30974e-11	39.1097	CYFIP2;NCKAP1;IPO11;CCNC;DCAF6;RPS6KA3;SYNGAP1;SCP2;ZMIZ1;PPP2R1A;LUC7L;SOX6;GLUL;CALN1;AGFG1;SOX5;MED1;SAP30BP;MEF2C;PRKCI;AP1B1;PHKA1;ANK2;ANK3;RC3H2;THAP2;MOSMO;AR;MARF1;XRN1;WDR82;XRN2;SIK3;SUCLG2;RIN2;CLOCK;TMEM87A;SET;ANAPC15;STXBP4;CEP85L;MYCBP2;NEDD4L;BAZ2A;PIK3R1;MTMR4;NYAP2;IQGAP2;GIGYF2;MED12L;TTBK2;EPB41L5;MAP2;PRKAR2A;DPH3;DECR2;GSTM1;DTNA;HOMER1;EXOC6B;PRRC2C;PUM1;ACADSB;PBX1;DCLK1;…
Influence Of Cugbp1 KO On Expression In C2C12 Mouse Cells GSE29990	HDSigDB 2021	Union of DiestVMaleAccent3 and EstVMaleAccent3 (female low/KO downreg, male high/KO upreg)	289	3692	3.08686e-10	1.62069	3.30974e-11	39.1097	CYFIP2;NCKAP1;IPO11;CCNC;DCAF6;RPS6KA3;SYNGAP1;SCP2;ZMIZ1;PPP2R1A;LUC7L;SOX6;GLUL;CALN1;AGFG1;SOX5;MED1;SAP30BP;MEF2C;PRKCI;AP1B1;PHKA1;ANK2;ANK3;RC3H2;THAP2;MOSMO;AR;MARF1;XRN1;WDR82;XRN2;SIK3;SUCLG2;RIN2;CLOCK;TMEM87A;SET;ANAPC15;STXBP4;CEP85L;MYCBP2;NEDD4L;BAZ2A;PIK3R1;MTMR4;NYAP2;IQGAP2;GIGYF2;MED12L;TTBK2;EPB41L5;MAP2;PRKAR2A;DPH3;DECR2;GSTM1;DTNA;HOMER1;EXOC6B;PRRC2C;PUM1;ACADSB;PBX1;DCLK1;…
Mouse 284 CA1 up	Allen scRNA 2021	DiestVMaleAccent1 (Diestrus vs Male, female high/KO upreg, male low/KO downreg)	49	309	3.10323e-10	3.3391	2.08913e-11	82.1141	CYFIP1;TOP2B;RIPOR1;ZFP445;USP31;PHF20;NEXMIF;SH3RF1;WDR44;IPO5;PCMTD2;DSTYK;MED13;NHSL1;PPP4R4;CHORDC1;GPBP1;PPFIA1;ZFP280D;WDR37;USP45;MSL2;ZFP91;MMD2;TUG1;SPTB;LZTFL1;BCR;LATS1;AR;C230057M02RIK;XRN2;CHST2;LRRC58;GM38393;MIEF1;RMND5A;UBN1;MCMBP;ZFP260;DECR2;SKIL;MGA;KBTBD11;INAFM2;AGO1;DNAL1;TAF2;PICALM
Mouse 284 CA1 up	Allen scRNA 2021	EstVMaleAccent1 (Estrus vs Male, female high/KO upreg, male low/KO downreg)	49	309	3.10323e-10	3.3391	2.08913e-11	82.1141	CYFIP1;TOP2B;RIPOR1;ZFP445;USP31;PHF20;NEXMIF;SH3RF1;WDR44;IPO5;PCMTD2;DSTYK;MED13;NHSL1;PPP4R4;CHORDC1;GPBP1;PPFIA1;ZFP280D;WDR37;USP45;MSL2;ZFP91;MMD2;TUG1;SPTB;LZTFL1;BCR;LATS1;AR;C230057M02RIK;XRN2;CHST2;LRRC58;GM38393;MIEF1;RMND5A;UBN1;MCMBP;ZFP260;DECR2;SKIL;MGA;KBTBD11;INAFM2;AGO1;DNAL1;TAF2;PICALM
Mouse 284 CA1 up	Allen scRNA 2021	DiestVMaleAccent3 (Diestrus vs Male, female low/KO downreg, male high/KO upreg)	49	309	3.10323e-10	3.3391	2.08913e-11	82.1141	CYFIP1;TOP2B;RIPOR1;ZFP445;USP31;PHF20;NEXMIF;SH3RF1;WDR44;IPO5;PCMTD2;DSTYK;MED13;NHSL1;PPP4R4;CHORDC1;GPBP1;PPFIA1;ZFP280D;WDR37;USP45;MSL2;ZFP91;MMD2;TUG1;SPTB;LZTFL1;BCR;LATS1;AR;C230057M02RIK;XRN2;CHST2;LRRC58;GM38393;MIEF1;RMND5A;UBN1;MCMBP;ZFP260;DECR2;SKIL;MGA;KBTBD11;INAFM2;AGO1;DNAL1;TAF2;PICALM
Mouse 284 CA1 up	Allen scRNA 2021	EstVMaleAccent3 (Estrus vs Male, female low/KO downreg, male high/KO upreg)	49	309	3.10323e-10	3.3391	2.08913e-11	82.1141	CYFIP1;TOP2B;RIPOR1;ZFP445;USP31;PHF20;NEXMIF;SH3RF1;WDR44;IPO5;PCMTD2;DSTYK;MED13;NHSL1;PPP4R4;CHORDC1;GPBP1;PPFIA1;ZFP280D;WDR37;USP45;MSL2;ZFP91;MMD2;TUG1;SPTB;LZTFL1;BCR;LATS1;AR;C230057M02RIK;XRN2;CHST2;LRRC58;GM38393;MIEF1;RMND5A;UBN1;MCMBP;ZFP260;DECR2;SKIL;MGA;KBTBD11;INAFM2;AGO1;DNAL1;TAF2;PICALM
Mouse 284 CA1 up	Allen scRNA 2021	Union of DiestVMaleAccent1 and EstVMaleAccent1 (female high/KO upreg, male low/KO downreg)	49	309	3.10323e-10	3.3391	2.08913e-11	82.1141	CYFIP1;TOP2B;RIPOR1;ZFP445;USP31;PHF20;NEXMIF;SH3RF1;WDR44;IPO5;PCMTD2;DSTYK;MED13;NHSL1;PPP4R4;CHORDC1;GPBP1;PPFIA1;ZFP280D;WDR37;USP45;MSL2;ZFP91;MMD2;TUG1;SPTB;LZTFL1;BCR;LATS1;AR;C230057M02RIK;XRN2;CHST2;LRRC58;GM38393;MIEF1;RMND5A;UBN1;MCMBP;ZFP260;DECR2;SKIL;MGA;KBTBD11;INAFM2;AGO1;DNAL1;TAF2;PICALM
Mouse 284 CA1 up	Allen scRNA 2021	Union of DiestVMaleAccent3 and EstVMaleAccent3 (female low/KO downreg, male high/KO upreg)	49	309	3.10323e-10	3.3391	2.08913e-11	82.1141	CYFIP1;TOP2B;RIPOR1;ZFP445;USP31;PHF20;NEXMIF;SH3RF1;WDR44;IPO5;PCMTD2;DSTYK;MED13;NHSL1;PPP4R4;CHORDC1;GPBP1;PPFIA1;ZFP280D;WDR37;USP45;MSL2;ZFP91;MMD2;TUG1;SPTB;LZTFL1;BCR;LATS1;AR;C230057M02RIK;XRN2;CHST2;LRRC58;GM38393;MIEF1;RMND5A;UBN1;MCMBP;ZFP260;DECR2;SKIL;MGA;KBTBD11;INAFM2;AGO1;DNAL1;TAF2;PICALM
Genes Down-Regulated In The Astrocytes Of R6/2 Mice Vs WT At 2 Month Old GSE124846	HDSigDB 2021	DiestVMaleAccent1 (Diestrus vs Male, female high/KO upreg, male low/KO downreg)	135	1385	3.18569e-10	1.97318	3.42947e-11	47.5458	CYFIP2;DGKG;RAB3C;NCKAP1;FRMPD4;DGKB;NAB1;DCAF6;DOCK10;RIMS1;SLK;SYNGAP1;PPP4R4;RGS8;PKNOX2;CALN1;MEF2A;PPP1R16B;NSF;UNC13C;PRKCI;LMO3;TMOD2;DIO2;PHKA1;ANK3;HPCAL4;KCTD6;BCR;STX1B;PPP1R3C;PAPPA;EEF1A2;GPD1;SIK3;ATF6;JCAD;SMIM3;NECAB1;LYPD1;SLC1A2;AGAP2;NEDD4L;IQGAP2;DNAJC28;ATXN1;ZMAT4;TPPP;SKIL;RAB6B;RAP1GAP2;EGR2;EGR3;HOMER1;RASL10B;TIPARP;IQSEC3;OGA;CORO2A;DCLK1;ST18;FOSL2;ARHGAP33;ARHGAP32;FA…
Genes Down-Regulated In The Astrocytes Of R6/2 Mice Vs WT At 2 Month Old GSE124846	HDSigDB 2021	Union of DiestVMaleAccent3 and EstVMaleAccent3 (female low/KO downreg, male high/KO upreg)	135	1385	3.18569e-10	1.97318	3.42947e-11	47.5458	CYFIP2;DGKG;RAB3C;NCKAP1;FRMPD4;DGKB;NAB1;DCAF6;DOCK10;RIMS1;SLK;SYNGAP1;PPP4R4;RGS8;PKNOX2;CALN1;MEF2A;PPP1R16B;NSF;UNC13C;PRKCI;LMO3;TMOD2;DIO2;PHKA1;ANK3;HPCAL4;KCTD6;BCR;STX1B;PPP1R3C;PAPPA;EEF1A2;GPD1;SIK3;ATF6;JCAD;SMIM3;NECAB1;LYPD1;SLC1A2;AGAP2;NEDD4L;IQGAP2;DNAJC28;ATXN1;ZMAT4;TPPP;SKIL;RAB6B;RAP1GAP2;EGR2;EGR3;HOMER1;RASL10B;TIPARP;IQSEC3;OGA;CORO2A;DCLK1;ST18;FOSL2;ARHGAP33;ARHGAP32;FA…
Genes Up-Regulated In Expression In Expanded CAG Repeats Vs Control ESCs After 4D Of Neuronal Differentiation GSE9760	HDSigDB 2021	DiestVMaleAccent1 (Diestrus vs Male, female high/KO upreg, male low/KO downreg)	96	870	4.3202e-10	2.23688	4.66948e-11	53.2095	RAB3C;KDM5C;BTG1;DGKD;PANK3;USP34;ELAVL4;LDB2;DUSP18;ELAVL1;ALKBH8;RO60;NIPBL;PTAR1;TRIM2;MEF2A;VAV3;MED1;USP8;MEF2C;PEG3;RFC1;RALGAPA1;SGIP1;TSC22D3;MAGI2;PHKA1;SOX11;SMC1A;ADAMTS20;DCTD;IMPACT;ARHGEF9;NCOR1;MMP16;XRN1;RUFY3;CRK;CHST2;XPR1;PAFAH1B1;MCPH1;CUL5;MAOB;STAU2;ANKRD12;GMPS;RASAL2;IQGAP2;PDS5A;CBL;TTBK2;ADD2;SRR;FUT9;MAP2;PRKAR2A;GNG7;UBR5;EIF4EBP2;RICTOR;SRGAP3;FNIP1;RAB6B;ARGLU1;LONRF…
Genes Up-Regulated In Expression In Expanded CAG Repeats Vs Control ESCs After 4D Of Neuronal Differentiation GSE9760	HDSigDB 2021	Union of DiestVMaleAccent3 and EstVMaleAccent3 (female low/KO downreg, male high/KO upreg)	96	870	4.3202e-10	2.23688	4.66948e-11	53.2095	RAB3C;KDM5C;BTG1;DGKD;PANK3;USP34;ELAVL4;LDB2;DUSP18;ELAVL1;ALKBH8;RO60;NIPBL;PTAR1;TRIM2;MEF2A;VAV3;MED1;USP8;MEF2C;PEG3;RFC1;RALGAPA1;SGIP1;TSC22D3;MAGI2;PHKA1;SOX11;SMC1A;ADAMTS20;DCTD;IMPACT;ARHGEF9;NCOR1;MMP16;XRN1;RUFY3;CRK;CHST2;XPR1;PAFAH1B1;MCPH1;CUL5;MAOB;STAU2;ANKRD12;GMPS;RASAL2;IQGAP2;PDS5A;CBL;TTBK2;ADD2;SRR;FUT9;MAP2;PRKAR2A;GNG7;UBR5;EIF4EBP2;RICTOR;SRGAP3;FNIP1;RAB6B;ARGLU1;LONRF…
Genes Up-Regulated In Non-myotonic Dystrophy Markers In Human Skeletal Muscle GSE48828	HDSigDB 2021	DiestVMaleAccent1 (Diestrus vs Male, female high/KO upreg, male low/KO downreg)	139	1447	4.35887e-10	1.94322	4.73012e-11	46.1991	TRIO;SPARC;TRRAP;ARHGAP35;AMOT;PREX2;DOCK10;SCP2;SESN3;GNPTAB;KIF5A;EP300;LUC7L;PLS3;PLXNC1;MEF2C;RALGAPA1;ACOT11;MRTFB;ANK2;ANK3;TUG1;RC3H2;MTURN;AR;MARF1;PPP1R3C;RUFY3;RELCH;ZFPM2;ALDH7A1;INO80D;KMT2A;MAGED1;KMT2C;MYCBP2;CREBL2;RASAL2;MTMR4;SMIM7;MED12L;DNAJC28;ZKSCAN8;MAP4;RIMKLB;ARGLU1;ANKRD26;CBX5;PRRC2C;HELZ;HSPA2;PBX1;DCLK1;MED13L;AFDN;CCDC88A;ARHGAP32;FER;PAN3;DLG2;NBEA;AGO1;DMXL1;BCL2;NF…
Genes Up-Regulated In Non-myotonic Dystrophy Markers In Human Skeletal Muscle GSE48828	HDSigDB 2021	Union of DiestVMaleAccent3 and EstVMaleAccent3 (female low/KO downreg, male high/KO upreg)	139	1447	4.35887e-10	1.94322	4.73012e-11	46.1991	TRIO;SPARC;TRRAP;ARHGAP35;AMOT;PREX2;DOCK10;SCP2;SESN3;GNPTAB;KIF5A;EP300;LUC7L;PLS3;PLXNC1;MEF2C;RALGAPA1;ACOT11;MRTFB;ANK2;ANK3;TUG1;RC3H2;MTURN;AR;MARF1;PPP1R3C;RUFY3;RELCH;ZFPM2;ALDH7A1;INO80D;KMT2A;MAGED1;KMT2C;MYCBP2;CREBL2;RASAL2;MTMR4;SMIM7;MED12L;DNAJC28;ZKSCAN8;MAP4;RIMKLB;ARGLU1;ANKRD26;CBX5;PRRC2C;HELZ;HSPA2;PBX1;DCLK1;MED13L;AFDN;CCDC88A;ARHGAP32;FER;PAN3;DLG2;NBEA;AGO1;DMXL1;BCL2;NF…
Expression In The Heart Of Mice Inducibly Expressing Celf1 For 72 H GSE56185	HDSigDB 2021	DiestVMaleAccent1 (Diestrus vs Male, female high/KO upreg, male low/KO downreg)	223	2677	4.48451e-10	1.70204	4.88585e-11	40.41	PANK3;PLEKHB2;ABAT;KLHDC7A;ALKBH8;ZMIZ1;GPBP1;CHORDC1;CDK5RAP1;LUC7L;TBC1D22A;GLUL;MED1;SAP30BP;MEF2C;PRKCI;OXSM;FRS2;ANK3;RC3H2;ASRGL1;ATG12;PPP1R3C;XRN2;SIK3;TCEANC2;ATF7;ZFPM2;ATF6;CLOCK;DCUN1D1;TMTC1;IQGAP2;TTBK2;DPH3;ZRANB3;GSTM3;EGR2;FZD3;GSTM1;EGR3;PHC1;DTNA;NEBL;EDEM1;INTS2;SMARCA5;PRRC2C;PHC3;PBX1;CCDC88A;SLC6A8;AGO3;MAGED2;CDK12;PAM;CPEB4;PHF3;PYGB;TOP2B;SMG1;SETD2;CITED2;ADK;CROT;PRL;Z…
Expression In The Heart Of Mice Inducibly Expressing Celf1 For 72 H GSE56185	HDSigDB 2021	Union of DiestVMaleAccent3 and EstVMaleAccent3 (female low/KO downreg, male high/KO upreg)	223	2677	4.48451e-10	1.70204	4.88585e-11	40.41	PANK3;PLEKHB2;ABAT;KLHDC7A;ALKBH8;ZMIZ1;GPBP1;CHORDC1;CDK5RAP1;LUC7L;TBC1D22A;GLUL;MED1;SAP30BP;MEF2C;PRKCI;OXSM;FRS2;ANK3;RC3H2;ASRGL1;ATG12;PPP1R3C;XRN2;SIK3;TCEANC2;ATF7;ZFPM2;ATF6;CLOCK;DCUN1D1;TMTC1;IQGAP2;TTBK2;DPH3;ZRANB3;GSTM3;EGR2;FZD3;GSTM1;EGR3;PHC1;DTNA;NEBL;EDEM1;INTS2;SMARCA5;PRRC2C;PHC3;PBX1;CCDC88A;SLC6A8;AGO3;MAGED2;CDK12;PAM;CPEB4;PHF3;PYGB;TOP2B;SMG1;SETD2;CITED2;ADK;CROT;PRL;Z…
Cerebellum Coexpressed Gene Module PMID17101986	HDSigDB 2021	DiestVMaleAccent1 (Diestrus vs Male, female high/KO upreg, male low/KO downreg)	103	965	5.61278e-10	2.15955	6.13936e-11	50.7791	ITSN2;DGKG;TRIO;DGKD;PANK3;NAB1;FMR1;RIMS1;RNF114;NFATC2IP;PPFIA1;PDE8B;PPFIA4;SOX5;EIF1AX;RALGAPA1;LMO3;MAGI2;DYRK1A;ANK3;MYT1;ILF3;CLOCK;DNMT1;SHC3;KMT2A;MAX;ANKRD12;BAZ2A;MTMR4;FOXO3;ATXN1;FUT9;BTBD3;IP6K1;DENND4A;NUP153;TRAPPC8;HELZ;BBIP1;ST18;MED13L;PUM2;ARHGAP32;ACBD3;EZH1;PHF3;B4GALT2;TOP2B;KDM5B;SMG1;BTG1;CDKN1B;USP32;SMG7;BICD1;LYST;ELAVL1;SYNE1;PCMTD2;NIPBL;XPO1;PSD3;REV3L;CEP170;TIMP4;…
Cerebellum Coexpressed Gene Module PMID17101986	HDSigDB 2021	Union of DiestVMaleAccent3 and EstVMaleAccent3 (female low/KO downreg, male high/KO upreg)	103	965	5.61278e-10	2.15955	6.13936e-11	50.7791	ITSN2;DGKG;TRIO;DGKD;PANK3;NAB1;FMR1;RIMS1;RNF114;NFATC2IP;PPFIA1;PDE8B;PPFIA4;SOX5;EIF1AX;RALGAPA1;LMO3;MAGI2;DYRK1A;ANK3;MYT1;ILF3;CLOCK;DNMT1;SHC3;KMT2A;MAX;ANKRD12;BAZ2A;MTMR4;FOXO3;ATXN1;FUT9;BTBD3;IP6K1;DENND4A;NUP153;TRAPPC8;HELZ;BBIP1;ST18;MED13L;PUM2;ARHGAP32;ACBD3;EZH1;PHF3;B4GALT2;TOP2B;KDM5B;SMG1;BTG1;CDKN1B;USP32;SMG7;BICD1;LYST;ELAVL1;SYNE1;PCMTD2;NIPBL;XPO1;PSD3;REV3L;CEP170;TIMP4;…
Genes Down-Regulated In Chat-expressing Interneurons Of zQ175DN Vs WT PMID32681824	HDSigDB 2021	DiestVMaleAccent1 (Diestrus vs Male, female high/KO upreg, male low/KO downreg)	81	686	5.74683e-10	2.40125	6.31082e-11	56.3963	ANKRD13C;NCKAP1;RAB3C;GSK3B;SMG1;HIP1;USP32;WIPF2;CTNND2;ELAVL4;CCNC;ZCCHC18;ARHGAP5;PPP1R9A;BICD1;CHD1;SPRED1;MED13;PSD3;REV3L;EP300;ERC2;TNPO1;PEG3;RFX3;IMPACT;NCOR1;ZEB1;CREB1;PIK3CA;NME7;XRN2;SMS;SIK3;CLOCK;KDM7A;SHANK2;CUL5;NUFIP2;ROCK1;STAU2;CEBPG;HTT;TMTC1;FAM117B;STRN3;MAP2;HSF2;TRA2A;RPRD1B;FSD1;FNIP1;FNIP2;ARGLU1;EPS15;WASF3;SCAI;CLASP1;HSPA8;CREBBP;TCAF1;HOMER1;CEP350;GFPT1;EXOC6B;LYRM…
Genes Down-Regulated In Chat-expressing Interneurons Of zQ175DN Vs WT PMID32681824	HDSigDB 2021	Union of DiestVMaleAccent3 and EstVMaleAccent3 (female low/KO downreg, male high/KO upreg)	81	686	5.74683e-10	2.40125	6.31082e-11	56.3963	ANKRD13C;NCKAP1;RAB3C;GSK3B;SMG1;HIP1;USP32;WIPF2;CTNND2;ELAVL4;CCNC;ZCCHC18;ARHGAP5;PPP1R9A;BICD1;CHD1;SPRED1;MED13;PSD3;REV3L;EP300;ERC2;TNPO1;PEG3;RFX3;IMPACT;NCOR1;ZEB1;CREB1;PIK3CA;NME7;XRN2;SMS;SIK3;CLOCK;KDM7A;SHANK2;CUL5;NUFIP2;ROCK1;STAU2;CEBPG;HTT;TMTC1;FAM117B;STRN3;MAP2;HSF2;TRA2A;RPRD1B;FSD1;FNIP1;FNIP2;ARGLU1;EPS15;WASF3;SCAI;CLASP1;HSPA8;CREBBP;TCAF1;HOMER1;CEP350;GFPT1;EXOC6B;LYRM…
Differentially Expressed Genes In Cortex Of 10 Mon HD Q140 Mice Vs Q20 GSE78272	HDSigDB 2021	DiestVMaleAccent1 (Diestrus vs Male, female high/KO upreg, male low/KO downreg)	81	689	7.10784e-10	2.38901	7.83614e-11	55.5916	ANKRD13C;LRSAM1;AHCYL1;HIP1;FAM107A;ARRB1;KLHDC7A;CROT;ARHGAP5;PITPNC1;DUSP11;DOCK10;SPRED1;SIPA1L1;ZMIZ1;PPP2R1A;PPP4R4;TRIM2;ZMYM6;LUC7L;TNPO1;TEAD1;GLUL;TIMP4;PPP1R16B;PAQR8;MEF2C;ZHX3;ACOT11;DIO2;AMT;PHKA1;ASRGL1;LZTFL1;TANC1;DNAJC1;DDAH1;GFOD1;LIX1;TBL1XR1;PXDN;SELENOP;SREK1;RIN2;CHST2;JCAD;SMIM3;AMER3;MGRN1;PDE1A;SLC1A2;NEDD4L;HTT;NDRG2;NWD1;MAP2;CAMK2N1;UBR5;LRRC4C;MAPK4;SASH1;RNF20;GSTM1;…
Differentially Expressed Genes In Cortex Of 10 Mon HD Q140 Mice Vs Q20 GSE78272	HDSigDB 2021	Union of DiestVMaleAccent3 and EstVMaleAccent3 (female low/KO downreg, male high/KO upreg)	81	689	7.10784e-10	2.38901	7.83614e-11	55.5916	ANKRD13C;LRSAM1;AHCYL1;HIP1;FAM107A;ARRB1;KLHDC7A;CROT;ARHGAP5;PITPNC1;DUSP11;DOCK10;SPRED1;SIPA1L1;ZMIZ1;PPP2R1A;PPP4R4;TRIM2;ZMYM6;LUC7L;TNPO1;TEAD1;GLUL;TIMP4;PPP1R16B;PAQR8;MEF2C;ZHX3;ACOT11;DIO2;AMT;PHKA1;ASRGL1;LZTFL1;TANC1;DNAJC1;DDAH1;GFOD1;LIX1;TBL1XR1;PXDN;SELENOP;SREK1;RIN2;CHST2;JCAD;SMIM3;AMER3;MGRN1;PDE1A;SLC1A2;NEDD4L;HTT;NDRG2;NWD1;MAP2;CAMK2N1;UBR5;LRRC4C;MAPK4;SASH1;RNF20;GSTM1;…
Genes Down-Regulated In HD Grade 2 Markers In Human Caudate Nucleus (HG-U133A) GSE3790	HDSigDB 2021	DiestVMaleAccent1 (Diestrus vs Male, female high/KO upreg, male low/KO downreg)	91	815	7.4544e-10	2.26181	8.25044e-11	52.5151	CYFIP2;CSRNP3;PLEKHB2;DGKB;OGDHL;LDB2;ACTB;DCAF6;SLK;SIPA1L1;GNPTAB;PPP2R1A;NCS1;KIF5A;PSD3;IDS;PHACTR1;PPFIA4;PPP1R16B;NSF;CAMK1D;PEG3;DYNLT3;LMO3;MRTFB;KCNAB2;DUSP8;IPCEF1;HPCAL4;SPTB;RNF41;BCR;CNKSR2;ARHGEF9;ARMCX2;RUFY3;EEF1A2;PKP4;B4GALT6;SHANK2;JCAD;PAFAH1B1;RAPGEF4;GAS7;ATP6V1A;SHC3;ROCK2;CAMK2A;AGAP2;NEDD4L;RNF6;ADD2;SV2C;CAMK2N1;SNTG1;MAP2;GNG7;PPP1R7;ZMAT4;G3BP2;PAK3;RAB6B;CLASP2;RAP1GA…
Genes Down-Regulated In HD Grade 2 Markers In Human Caudate Nucleus (HG-U133A) GSE3790	HDSigDB 2021	Union of DiestVMaleAccent3 and EstVMaleAccent3 (female low/KO downreg, male high/KO upreg)	91	815	7.4544e-10	2.26181	8.25044e-11	52.5151	CYFIP2;CSRNP3;PLEKHB2;DGKB;OGDHL;LDB2;ACTB;DCAF6;SLK;SIPA1L1;GNPTAB;PPP2R1A;NCS1;KIF5A;PSD3;IDS;PHACTR1;PPFIA4;PPP1R16B;NSF;CAMK1D;PEG3;DYNLT3;LMO3;MRTFB;KCNAB2;DUSP8;IPCEF1;HPCAL4;SPTB;RNF41;BCR;CNKSR2;ARHGEF9;ARMCX2;RUFY3;EEF1A2;PKP4;B4GALT6;SHANK2;JCAD;PAFAH1B1;RAPGEF4;GAS7;ATP6V1A;SHC3;ROCK2;CAMK2A;AGAP2;NEDD4L;RNF6;ADD2;SV2C;CAMK2N1;SNTG1;MAP2;GNG7;PPP1R7;ZMAT4;G3BP2;PAK3;RAB6B;CLASP2;RAP1GA…
Down-regulated Genes In Cerebellum Of 6 Mon HD Q175 Mice Vs Q20 GSE73468	HDSigDB 2021	DiestVMaleAccent1 (Diestrus vs Male, female high/KO upreg, male low/KO downreg)	129	1321	7.90586e-10	1.97148	8.78429e-11	45.6505	OTUD4;AHCYL1;PRDM9;SPARC;NAB1;ARAF;OGDHL;ABAT;RORB;FGF1;ALKBH5;RIMS4;KMT5A;GLUL;MEF2A;USP8;EIF1AX;LMO3;MMD2;ASRGL1;UHMK1;PYGO1;STX1B;PPP1R3C;LIX1;TBL1XR1;PAPPA;SELENOP;UBE2V2;ATF7;TMEM126B;LRRC58;ABHD4;GMPS;SLC1A2;CLEC16A;BAZ2A;UBFD1;TMTC1;NDRG2;LARP1;ATXN1;SNTG1;BTBD3;ZMAT4;ZKSCAN8;TPPP;MAP4;RIMKLB;MCL1;ACBD5;GSTM1;CPSF6;CBX5;NEBL;IQSEC3;OGA;IRF2BP2;HSPA12A;ARHGAP26;PRDX6;FOSL2;NR4A2;ARHGAP32;PE…
Down-regulated Genes In Cerebellum Of 6 Mon HD Q175 Mice Vs Q20 GSE73468	HDSigDB 2021	Union of DiestVMaleAccent3 and EstVMaleAccent3 (female low/KO downreg, male high/KO upreg)	129	1321	7.90586e-10	1.97148	8.78429e-11	45.6505	OTUD4;AHCYL1;PRDM9;SPARC;NAB1;ARAF;OGDHL;ABAT;RORB;FGF1;ALKBH5;RIMS4;KMT5A;GLUL;MEF2A;USP8;EIF1AX;LMO3;MMD2;ASRGL1;UHMK1;PYGO1;STX1B;PPP1R3C;LIX1;TBL1XR1;PAPPA;SELENOP;UBE2V2;ATF7;TMEM126B;LRRC58;ABHD4;GMPS;SLC1A2;CLEC16A;BAZ2A;UBFD1;TMTC1;NDRG2;LARP1;ATXN1;SNTG1;BTBD3;ZMAT4;ZKSCAN8;TPPP;MAP4;RIMKLB;MCL1;ACBD5;GSTM1;CPSF6;CBX5;NEBL;IQSEC3;OGA;IRF2BP2;HSPA12A;ARHGAP26;PRDX6;FOSL2;NR4A2;ARHGAP32;PE…
Pulse wave Arterial Stiffness index 21021 raw	Nearby Genes of UK Biobank Trait GWAS	DiestVMaleAccent3 (Diestrus vs Male, female low/KO downreg, male high/KO upreg)	313	3995	8.06764e-10	1.64159	2.82085e-12	43.6563	IPO11;MTRR;ZFYVE9;FRMPD4;CCNC;IKZF2;PREX2;RPS6KA3;ZMIZ1;PPP4R4;GPBP1;CHORDC1;PLCE1;SOX6;TBC1D22A;GLUL;CALN1;SOX5;UNC13C;PRKCI;AP1B1;RFX3;ANK2;SOX11;ANK3;ATG12;AR;PAPPA;XRN2;SIK3;TCEANC2;SUCLG2;ATF7;KCTD12;ZFPM2;RIN2;MTMR1;MAOB;PDE1A;MYCBP2;LYPD1;DCUN1D1;RNF219;NEDD4L;TMTC1;PIK3R1;NYAP2;GIGYF2;MED12L;TTBK2;LARP1;MAP2;PRKAR2A;STXBP5;MAP4;ARGLU1;SCAI;EGR2;DTNA;NEBL;TIPARP;EDEM1;EXOC6B;RAB27B;GNG12;S…
Genes Up-Regulated In Pons Of 28 Week WT Mice Vs Atxn 1 154Q/2Q Mice Both Treated With Vehicle GSE114674	HDSigDB 2021	DiestVMaleAccent1 (Diestrus vs Male, female high/KO upreg, male low/KO downreg)	166	1847	8.72731e-10	1.81849	9.73474e-11	41.9212	NCKAP1;ALDH1L1;GMFB;AHCYL1;SPARC;KLHDC7A;NUDT5;FGF1;AMOT;DOCK10;RGS5;CHORDC1;PLS3;KMT5A;GLUL;CALN1;PAQR8;NSF;UNC13C;MMGT1;DIO2;PHKA1;MMD2;ASRGL1;ATG12;UHMK1;MOSMO;STX1B;TANC1;MARF1;PPP1R3C;PAPPA;SELENOP;UBE2V2;PKP4;TMEM126B;JCAD;SMIM3;LXN;ANAPC15;SDC4;ARHGEF26;ABHD4;LYPD1;SLC1A2;CREBL2;PLA2G6;NDRG2;DNAJC28;ZMAT4;SRGAP3;TPPP;MAP4;RAB6B;SPECC1;RAP1GAP2;GSTM3;ACBD5;GSTM1;HOMER1;NEBL;RASL10B;EDEM1;ID…
Genes Up-Regulated In Pons Of 28 Week WT Mice Vs Atxn 1 154Q/2Q Mice Both Treated With Vehicle GSE114674	HDSigDB 2021	Union of DiestVMaleAccent3 and EstVMaleAccent3 (female low/KO downreg, male high/KO upreg)	166	1847	8.72731e-10	1.81849	9.73474e-11	41.9212	NCKAP1;ALDH1L1;GMFB;AHCYL1;SPARC;KLHDC7A;NUDT5;FGF1;AMOT;DOCK10;RGS5;CHORDC1;PLS3;KMT5A;GLUL;CALN1;PAQR8;NSF;UNC13C;MMGT1;DIO2;PHKA1;MMD2;ASRGL1;ATG12;UHMK1;MOSMO;STX1B;TANC1;MARF1;PPP1R3C;PAPPA;SELENOP;UBE2V2;PKP4;TMEM126B;JCAD;SMIM3;LXN;ANAPC15;SDC4;ARHGEF26;ABHD4;LYPD1;SLC1A2;CREBL2;PLA2G6;NDRG2;DNAJC28;ZMAT4;SRGAP3;TPPP;MAP4;RAB6B;SPECC1;RAP1GAP2;GSTM3;ACBD5;GSTM1;HOMER1;NEBL;RASL10B;EDEM1;ID…
Astrocyte Gene Module From Human Brain PMID20616000	HDSigDB 2021	DiestVMaleAccent1 (Diestrus vs Male, female high/KO upreg, male low/KO downreg)	58	422	1.01943e-09	2.83162	1.14593e-10	64.8147	ALDH1L1;AHCYL1;SPARC;FAM107A;ABAT;PYGM;ARHGAP5;OSBPL11;ELAVL1;PITPNC1;TMEM100;DPYSL3;GLUL;USP46;HSDL2;ZHX3;S100A1;MAGI2;PHKA1;PPP1R3C;DDAH1;ACOX1;ALDH1A1;SUCLG2;ACSBG1;ALDH7A1;RIN2;MAOB;SDC4;ARHGEF26;SLC1A2;NDRG2;ARHGAP12;GNA13;RIDA;PAK1;FUT9;CBS;NDP;WASF3;TCF7L2;GSTM1;DTNA;NEBL;KCNJ16;SORBS1;GNG12;PRDX6;DHRS3;ETNPPL;MARCKS;NFIB;RAB13;BCL2;ANP32E;SCRG1;FGFR3;GSTM5
Genes Down-Regulated In Pvalb/Th-expressing Interneurons Of R6/2 Vs WT PMID32681824	HDSigDB 2021	DiestVMaleAccent1 (Diestrus vs Male, female high/KO upreg, male low/KO downreg)	58	422	1.01943e-09	2.83162	1.14593e-10	64.8147	DGKG;RAB3C;TRIO;NRSN1;DGKD;THRB;FRMPD4;ABAT;ARHGAP5;ADRA1A;PITPNC1;RIMS4;ZMIZ1;ERC2;SOX6;PDE8B;SPTAN1;PPFIA4;PKNOX2;CALN1;SOX5;MEF2A;PPP1R16B;CAMK1D;PEG3;PROX1;SPTB;SETBP1;PKP4;RAPGEF5;MGLL;GAS7;NECAB1;CAMK2A;PRICKLE2;ATXN1;ZMAT4;SRGAP3;ARNT2;SPAG5;NEBL;GAD1;IQSEC3;NMNAT2;SORBS1;HS3ST4;ST18;DCLK1;DLG2;PDE10A;LAS1L;NFIB;SPIRE1;TCF4;SSBP2;CPEB2;PAM;CPEB4
Astrocyte Gene Module From Human Brain PMID20616000	HDSigDB 2021	Union of DiestVMaleAccent3 and EstVMaleAccent3 (female low/KO downreg, male high/KO upreg)	58	422	1.01943e-09	2.83162	1.14593e-10	64.8147	ALDH1L1;AHCYL1;SPARC;FAM107A;ABAT;PYGM;ARHGAP5;OSBPL11;ELAVL1;PITPNC1;TMEM100;DPYSL3;GLUL;USP46;HSDL2;ZHX3;S100A1;MAGI2;PHKA1;PPP1R3C;DDAH1;ACOX1;ALDH1A1;SUCLG2;ACSBG1;ALDH7A1;RIN2;MAOB;SDC4;ARHGEF26;SLC1A2;NDRG2;ARHGAP12;GNA13;RIDA;PAK1;FUT9;CBS;NDP;WASF3;TCF7L2;GSTM1;DTNA;NEBL;KCNJ16;SORBS1;GNG12;PRDX6;DHRS3;ETNPPL;MARCKS;NFIB;RAB13;BCL2;ANP32E;SCRG1;FGFR3;GSTM5
Genes Down-Regulated In Pvalb/Th-expressing Interneurons Of R6/2 Vs WT PMID32681824	HDSigDB 2021	Union of DiestVMaleAccent3 and EstVMaleAccent3 (female low/KO downreg, male high/KO upreg)	58	422	1.01943e-09	2.83162	1.14593e-10	64.8147	DGKG;RAB3C;TRIO;NRSN1;DGKD;THRB;FRMPD4;ABAT;ARHGAP5;ADRA1A;PITPNC1;RIMS4;ZMIZ1;ERC2;SOX6;PDE8B;SPTAN1;PPFIA4;PKNOX2;CALN1;SOX5;MEF2A;PPP1R16B;CAMK1D;PEG3;PROX1;SPTB;SETBP1;PKP4;RAPGEF5;MGLL;GAS7;NECAB1;CAMK2A;PRICKLE2;ATXN1;ZMAT4;SRGAP3;ARNT2;SPAG5;NEBL;GAD1;IQSEC3;NMNAT2;SORBS1;HS3ST4;ST18;DCLK1;DLG2;PDE10A;LAS1L;NFIB;SPIRE1;TCF4;SSBP2;CPEB2;PAM;CPEB4
Genes Changed In Ciliated Ependymal Cells Of zQ175DN Vs WT PMID32681824	HDSigDB 2021	DiestVMaleAccent1 (Diestrus vs Male, female high/KO upreg, male low/KO downreg)	59	434	1.08914e-09	2.79697	1.22899e-10	63.8259	DGKD;THRB;UBXN2B;DGKB;CTNND2;RASGRF1;USP34;ADK;PCMTD2;NIPBL;RNF114;PSD3;PHACTR1;SOX6;SPTAN1;SOX5;NSF;NCOA2;STRBP;FRS2;PHKA1;ANK2;ASH1L;PJA2;ADAMTS20;MMP16;LRRC7;CTDSP2;DOK6;SIK3;MAPRE2;ARHGEF26;ANKRD12;NEDD4L;AKAP6;LARP1;ATXN1;FAM168A;CAMK2N1;SNTG1;UBR5;LRRC4C;MAPK4;SRPK2;FZD3;DTNA;HOMER1;KLHL3;HIPK1;BAIAP2;PBX1;ETNPPL;MIB1;FER;DLG2;NBEA;AGBL3;SSBP2;SSBP3
Genes Changed In Ciliated Ependymal Cells Of zQ175DN Vs WT PMID32681824	HDSigDB 2021	Union of DiestVMaleAccent3 and EstVMaleAccent3 (female low/KO downreg, male high/KO upreg)	59	434	1.08914e-09	2.79697	1.22899e-10	63.8259	DGKD;THRB;UBXN2B;DGKB;CTNND2;RASGRF1;USP34;ADK;PCMTD2;NIPBL;RNF114;PSD3;PHACTR1;SOX6;SPTAN1;SOX5;NSF;NCOA2;STRBP;FRS2;PHKA1;ANK2;ASH1L;PJA2;ADAMTS20;MMP16;LRRC7;CTDSP2;DOK6;SIK3;MAPRE2;ARHGEF26;ANKRD12;NEDD4L;AKAP6;LARP1;ATXN1;FAM168A;CAMK2N1;SNTG1;UBR5;LRRC4C;MAPK4;SRPK2;FZD3;DTNA;HOMER1;KLHL3;HIPK1;BAIAP2;PBX1;ETNPPL;MIB1;FER;DLG2;NBEA;AGBL3;SSBP2;SSBP3
Differentially Expressed Genes In Cerebellum Of HD Q175 Mice PMID26900923	HDSigDB 2021	DiestVMaleAccent1 (Diestrus vs Male, female high/KO upreg, male low/KO downreg)	196	2296	1.13246e-09	1.73249	1.28277e-10	39.4607	SPARC;NEXMIF;CCNC;KLHDC7A;DCAF6;ALKBH5;PEG13;DPYSL5;PPP2R1A;DPYSL3;PLCE1;GLUL;UNC13C;MEF2C;PRKCI;ANK3;HPCAL4;ASRGL1;PPP1R3C;PAPPA;RELCH;HECA;ZFPM2;MTMR1;NECAB1;LXN;PDE1A;NEDD4L;NYAP2;IQGAP2;RAD21;DHX36;SRPK2;CREBBP;GSTM1;PHC1;NCAPH2;IQSEC3;IRF2BP2;HSPA12A;GNG12;PRDX6;ST18;MED13L;PUM2;PEX5L;LAS1L;FXYD6;MAGED2;CDK14;SFXN5;GSTM5;CDK16;PHF3;TOP2B;HBS1L;SMG1;BTG1;HIP1;PYGM;RSF1;CROT;ZCCHC18;WDR44;NIPB…
Differentially Expressed Genes In Cerebellum Of HD Q175 Mice PMID26900923	HDSigDB 2021	Union of DiestVMaleAccent3 and EstVMaleAccent3 (female low/KO downreg, male high/KO upreg)	196	2296	1.13246e-09	1.73249	1.28277e-10	39.4607	SPARC;NEXMIF;CCNC;KLHDC7A;DCAF6;ALKBH5;PEG13;DPYSL5;PPP2R1A;DPYSL3;PLCE1;GLUL;UNC13C;MEF2C;PRKCI;ANK3;HPCAL4;ASRGL1;PPP1R3C;PAPPA;RELCH;HECA;ZFPM2;MTMR1;NECAB1;LXN;PDE1A;NEDD4L;NYAP2;IQGAP2;RAD21;DHX36;SRPK2;CREBBP;GSTM1;PHC1;NCAPH2;IQSEC3;IRF2BP2;HSPA12A;GNG12;PRDX6;ST18;MED13L;PUM2;PEX5L;LAS1L;FXYD6;MAGED2;CDK14;SFXN5;GSTM5;CDK16;PHF3;TOP2B;HBS1L;SMG1;BTG1;HIP1;PYGM;RSF1;CROT;ZCCHC18;WDR44;NIPB…
ZNF253 SIRNA T47D HUMAN GSE79586 RNASEQ UP	Lit Mined TF Perturbation Signatures	DiestVMaleAccent1 (Diestrus vs Male, female high/KO upreg, male low/KO downreg)	68	503	1.28569e-09	2.79412	5.93092e-12	72.2304	KDM5B;BTG1;B4GALT1;DDX3X;CLTC;SETD7;PTEN;EPRS;IPO7;AFF4;ARHGAP35;DCAF6;NARS;XPO1;SENP5;ZMIZ1;OSBP;CHORDC1;PLS3;TNPO1;SPTAN1;NSF;WARS;ARHGEF12;NCOA3;STRBP;VPS13D;ZFR;ZFP91;FRS2;ZHX1;CKAP5;RC3H2;EEF1G;PTP4A2;RALGAPB;TMEM87A;SET;UBFD1;PDS5A;CAMSAP2;GNA13;LARP1;KCTD20;TNKS2;RAD21;UBR5;ANKRD52;EIF4B;TRIM44;RAB11FIP4;ARFGEF1;GSTM3;CBX5;SPAG5;HOMER2;HUWE1;PRRC2C;WWP1;DSTN;AP2B1;EEF2;CDC42BPA;MED13L;ARHG…
ZNF253 SIRNA T47D HUMAN GSE79586 RNASEQ UP	Lit Mined TF Perturbation Signatures	EstVMaleAccent1 (Estrus vs Male, female high/KO upreg, male low/KO downreg)	68	503	1.28569e-09	2.79412	5.93092e-12	72.2304	KDM5B;BTG1;B4GALT1;DDX3X;CLTC;SETD7;PTEN;EPRS;IPO7;AFF4;ARHGAP35;DCAF6;NARS;XPO1;SENP5;ZMIZ1;OSBP;CHORDC1;PLS3;TNPO1;SPTAN1;NSF;WARS;ARHGEF12;NCOA3;STRBP;VPS13D;ZFR;ZFP91;FRS2;ZHX1;CKAP5;RC3H2;EEF1G;PTP4A2;RALGAPB;TMEM87A;SET;UBFD1;PDS5A;CAMSAP2;GNA13;LARP1;KCTD20;TNKS2;RAD21;UBR5;ANKRD52;EIF4B;TRIM44;RAB11FIP4;ARFGEF1;GSTM3;CBX5;SPAG5;HOMER2;HUWE1;PRRC2C;WWP1;DSTN;AP2B1;EEF2;CDC42BPA;MED13L;ARHG…
ZNF253 SIRNA T47D HUMAN GSE79586 RNASEQ UP	Lit Mined TF Perturbation Signatures	DiestVMaleAccent3 (Diestrus vs Male, female low/KO downreg, male high/KO upreg)	68	503	1.28569e-09	2.79412	5.93092e-12	72.2304	KDM5B;BTG1;B4GALT1;DDX3X;CLTC;SETD7;PTEN;EPRS;IPO7;AFF4;ARHGAP35;DCAF6;NARS;XPO1;SENP5;ZMIZ1;OSBP;CHORDC1;PLS3;TNPO1;SPTAN1;NSF;WARS;ARHGEF12;NCOA3;STRBP;VPS13D;ZFR;ZFP91;FRS2;ZHX1;CKAP5;RC3H2;EEF1G;PTP4A2;RALGAPB;TMEM87A;SET;UBFD1;PDS5A;CAMSAP2;GNA13;LARP1;KCTD20;TNKS2;RAD21;UBR5;ANKRD52;EIF4B;TRIM44;RAB11FIP4;ARFGEF1;GSTM3;CBX5;SPAG5;HOMER2;HUWE1;PRRC2C;WWP1;DSTN;AP2B1;EEF2;CDC42BPA;MED13L;ARHG…
Genes Down-Regulated In Expression In Quadriceps Muscle Of 3 Mon Mbnl1 KO Myotonic Dystrophy Mice GSE14691	HDSigDB 2021	DiestVMaleAccent1 (Diestrus vs Male, female high/KO upreg, male low/KO downreg)	71	576	1.308e-09	2.51076	1.48726e-10	56.8159	PLEKHB2;USP34;CROT;METTL11B;AFF4;CDC73;UBE2L3;ALKBH5;PAIP2B;NHSL1;SCP2;SCRN3;KPNA4;KMT5A;SOX6;KPNA3;ZCCHC24;PRKAB2;LYNX1;VPS33A;STRBP;TSC22D2;USP45;ZFP91;ASH1L;DUSP8;DYNLL2;PGM2L1;UHMK1;PHF20L1;AR;IMPACT;GPD1;UBE2V2;HECA;SFT2D2;PAFAH1B1;PDXK;ROCK2;STXBP4;GOSR2;CEBPG;CAMK2A;TMTC1;PDS5B;DNAJC27;ZBTB41;RAB21;BTAF1;PRKAR2A;EIF4EBP2;TPPP;EPS15;UBL4A;ARNT2;DTNA;HOMER1;WTAP;HOMER2;CEP350;SMARCA5;BBIP1;T…
Genes Down-Regulated In Expression In Quadriceps Muscle Of 3 Mon Mbnl1 KO Myotonic Dystrophy Mice GSE14691	HDSigDB 2021	Union of DiestVMaleAccent3 and EstVMaleAccent3 (female low/KO downreg, male high/KO upreg)	71	576	1.308e-09	2.51076	1.48726e-10	56.8159	PLEKHB2;USP34;CROT;METTL11B;AFF4;CDC73;UBE2L3;ALKBH5;PAIP2B;NHSL1;SCP2;SCRN3;KPNA4;KMT5A;SOX6;KPNA3;ZCCHC24;PRKAB2;LYNX1;VPS33A;STRBP;TSC22D2;USP45;ZFP91;ASH1L;DUSP8;DYNLL2;PGM2L1;UHMK1;PHF20L1;AR;IMPACT;GPD1;UBE2V2;HECA;SFT2D2;PAFAH1B1;PDXK;ROCK2;STXBP4;GOSR2;CEBPG;CAMK2A;TMTC1;PDS5B;DNAJC27;ZBTB41;RAB21;BTAF1;PRKAR2A;EIF4EBP2;TPPP;EPS15;UBL4A;ARNT2;DTNA;HOMER1;WTAP;HOMER2;CEP350;SMARCA5;BBIP1;T…
Genes Changed In Mural Cells Of zQ175DN Vs WT PMID32681824	HDSigDB 2021	DiestVMaleAccent1 (Diestrus vs Male, female high/KO upreg, male low/KO downreg)	45	285	1.40049e-09	3.31303	1.59849e-10	74.7314	ITSN2;SMG1;HIP1;UBE3C;FRMPD4;CTNND2;ANKRD12;AKAP6;PPM1E;MED12L;CAMSAP2;SYNE1;RIMS1;CHORDC1;UBR5;PLCE1;HMG20A;PHACTR1;PDE8B;LRRC4C;ERC2;NCOA1;ARHGEF11;ATF7IP;NCOA2;CREBBP;ACBD5;UBE2H;ARHGEF12;RALGAPA1;SGIP1;CEP350;ANK2;ANK3;RC3H2;MARF1;ZEB1;DLG2;PAN3;PDE10A;ABI2;SIK3;TCF4;PTPN4;SSBP3
Genes Changed In Mural Cells Of zQ175DN Vs WT PMID32681824	HDSigDB 2021	Union of DiestVMaleAccent3 and EstVMaleAccent3 (female low/KO downreg, male high/KO upreg)	45	285	1.40049e-09	3.31303	1.59849e-10	74.7314	ITSN2;SMG1;HIP1;UBE3C;FRMPD4;CTNND2;ANKRD12;AKAP6;PPM1E;MED12L;CAMSAP2;SYNE1;RIMS1;CHORDC1;UBR5;PLCE1;HMG20A;PHACTR1;PDE8B;LRRC4C;ERC2;NCOA1;ARHGEF11;ATF7IP;NCOA2;CREBBP;ACBD5;UBE2H;ARHGEF12;RALGAPA1;SGIP1;CEP350;ANK2;ANK3;RC3H2;MARF1;ZEB1;DLG2;PAN3;PDE10A;ABI2;SIK3;TCF4;PTPN4;SSBP3
Expression In Quadriceps Muscle Of HSALR 41 Myotonic Dystrophy Mice (MOE430B Array) GSE14691	HDSigDB 2021	DiestVMaleAccent1 (Diestrus vs Male, female high/KO upreg, male low/KO downreg)	37	206	1.4595e-09	3.854	1.67215e-10	86.7602	AHCTF1;NUFIP2;RNMT;PDS5B;RASAL2;METTL11B;CHD1;SYNE1;RMND5A;NCS1;PPFIA1;NAA25;ARID2;ZYG11B;PRKAB2;CPSF6;EIF1AX;STRBP;TSC22D2;PCGF3;VPS13D;ASRGL1;RC3H2;MIB1;PDP1;MKLN1;AFDN;DIAPH2;GNAQ;UBE2V2;UBE2N;SPIRE1;HECA;RAPGEF5;CPEB2;PLCD4;JCAD
Expression In Quadriceps Muscle Of HSALR 41 Myotonic Dystrophy Mice (MOE430B Array) GSE14691	HDSigDB 2021	Union of DiestVMaleAccent3 and EstVMaleAccent3 (female low/KO downreg, male high/KO upreg)	37	206	1.4595e-09	3.854	1.67215e-10	86.7602	AHCTF1;NUFIP2;RNMT;PDS5B;RASAL2;METTL11B;CHD1;SYNE1;RMND5A;NCS1;PPFIA1;NAA25;ARID2;ZYG11B;PRKAB2;CPSF6;EIF1AX;STRBP;TSC22D2;PCGF3;VPS13D;ASRGL1;RC3H2;MIB1;PDP1;MKLN1;AFDN;DIAPH2;GNAQ;UBE2V2;UBE2N;SPIRE1;HECA;RAPGEF5;CPEB2;PLCD4;JCAD
Genes Down-Regulated In Expression In Quadriceps Muscle Of HSALR 41 Myotonic Dystrophy Mice (MOE430B Array) GSE14691	HDSigDB 2021	DiestVMaleAccent1 (Diestrus vs Male, female high/KO upreg, male low/KO downreg)	30	143	1.58126e-09	4.6568	1.81848e-10	104.442	AHCTF1;NUFIP2;RNMT;PDS5B;RASAL2;METTL11B;CHD1;PPFIA1;ARID2;PRKAB2;CPSF6;EIF1AX;STRBP;TSC22D2;VPS13D;PCGF3;ASRGL1;RC3H2;MIB1;PDP1;AFDN;MKLN1;DIAPH2;GNAQ;UBE2V2;UBE2N;HECA;RAPGEF5;PLCD4;JCAD
Genes Down-Regulated In Expression In Quadriceps Muscle Of HSALR 41 Myotonic Dystrophy Mice (MOE430B Array) GSE14691	HDSigDB 2021	Union of DiestVMaleAccent3 and EstVMaleAccent3 (female low/KO downreg, male high/KO upreg)	30	143	1.58126e-09	4.6568	1.81848e-10	104.442	AHCTF1;NUFIP2;RNMT;PDS5B;RASAL2;METTL11B;CHD1;PPFIA1;ARID2;PRKAB2;CPSF6;EIF1AX;STRBP;TSC22D2;VPS13D;PCGF3;ASRGL1;RC3H2;MIB1;PDP1;AFDN;MKLN1;DIAPH2;GNAQ;UBE2V2;UBE2N;HECA;RAPGEF5;PLCD4;JCAD
CREB1 23762244 ChIP-Seq HIPPOCAMPUS Rat	ChEA 2016-TF Regulator Predictions by ChIP	Union of DiestVMaleAccent1 and EstVMaleAccent1 (female high/KO upreg, male low/KO downreg)	208	2393	1.76122e-09	1.78173	5.48667e-12	46.1978	IPO11;AHCYL1;PANK3;ARAF;EPRS;ACTB;DCAF6;ALKBH5;ZMIZ1;PPP2R1A;GPBP1;LUC7L;TBC1D22A;MEF2A;SAP30BP;PRKAB2;RFX3;RC3H2;ATG12;XRN1;XRN2;SIK3;ATF7;HECA;NOLC1;PLA2G6;MTMR4;TTBK2;DHX36;DPH3;SCAI;HOMER1;NCAPH2;SMARCA5;IRF2BP2;DCLK1;MED13L;FOSL2;QARS;NMT1;ANP32E;CPEB4;TOP2B;BTG1;HIP1;PHF20;CITED2;CLTC;ZFP800;RSF1;OSBPL11;SMG7;NIPBL;XPO1;OTUD6B;ARIH1;TEAD1;LIN52;RAB8B;VAV3;NCOA2;PRMT5;PCYT1A;WARS;TSC22D3;ZFR…
CREB1 23762244 ChIP-Seq HIPPOCAMPUS Rat	ChEA 2016-TF Regulator Predictions by ChIP	Union of DiestVMaleAccent3 and EstVMaleAccent3 (female low/KO downreg, male high/KO upreg)	208	2393	1.76122e-09	1.78173	5.48667e-12	46.1978	IPO11;AHCYL1;PANK3;ARAF;EPRS;ACTB;DCAF6;ALKBH5;ZMIZ1;PPP2R1A;GPBP1;LUC7L;TBC1D22A;MEF2A;PRKAB2;SAP30BP;RFX3;RC3H2;ATG12;XRN1;XRN2;SIK3;ATF7;HECA;NOLC1;MTMR4;PLA2G6;TTBK2;DHX36;DPH3;SCAI;HOMER1;NCAPH2;SMARCA5;IRF2BP2;DCLK1;MED13L;FOSL2;QARS;NMT1;ANP32E;CPEB4;TOP2B;BTG1;HIP1;PHF20;CITED2;CLTC;ZFP800;RSF1;OSBPL11;SMG7;NIPBL;XPO1;OTUD6B;ARIH1;TEAD1;LIN52;RAB8B;VAV3;NCOA2;PRMT5;WARS;PCYT1A;TSC22D3;ZFR…
Genes Down-Regulated In Foxp2/Olfm3-expressing Neurons Of zQ175DN Vs WT PMID32681824	HDSigDB 2021	DiestVMaleAccent1 (Diestrus vs Male, female high/KO upreg, male low/KO downreg)	60	451	1.77796e-09	2.72824	2.05238e-10	60.8585	GSK3B;TRIO;AHCYL1;LRRK2;CELF5;ABAT;AFF4;ACTB;PITPNC1;DCAF6;SYNE1;RPS6KA3;SPRED1;PPP4R4;PHACTR1;PJA2;BCR;CNKSR2;MMP16;SIK3;SREK1;ATF6;NECAB1;KMT2A;ROCK2;CAMK2A;NEDD4L;NYAP2;CBL;BTAF1;ATXN1;GNG7;UBR5;STXBP5;LRRC4C;PAK3;FNIP2;RANBP2;SPECC1;TCAF1;HOMER1;NEBL;GAD1;SORBS2;NMNAT2;AP2B1;BAIAP2;MYO9A;HS3ST4;PBX1;DCLK1;ARHGAP32;DIAPH2;PLCXD3;GNAL;PDE10A;NBEA;NF1;TACC1;PAM
Genes Down-Regulated In Foxp2/Olfm3-expressing Neurons Of zQ175DN Vs WT PMID32681824	HDSigDB 2021	Union of DiestVMaleAccent3 and EstVMaleAccent3 (female low/KO downreg, male high/KO upreg)	60	451	1.77796e-09	2.72824	2.05238e-10	60.8585	GSK3B;TRIO;AHCYL1;LRRK2;CELF5;ABAT;AFF4;ACTB;PITPNC1;DCAF6;SYNE1;RPS6KA3;SPRED1;PPP4R4;PHACTR1;PJA2;BCR;CNKSR2;MMP16;SIK3;SREK1;ATF6;NECAB1;KMT2A;ROCK2;CAMK2A;NEDD4L;NYAP2;CBL;BTAF1;ATXN1;GNG7;UBR5;STXBP5;LRRC4C;PAK3;FNIP2;RANBP2;SPECC1;TCAF1;HOMER1;NEBL;GAD1;SORBS2;NMNAT2;AP2B1;BAIAP2;MYO9A;HS3ST4;PBX1;DCLK1;ARHGAP32;DIAPH2;PLCXD3;GNAL;PDE10A;NBEA;NF1;TACC1;PAM
IKZF4 KO MOUSE GSE40273 CREEDSID GENE 1061 DOWN	Lit Mined TF Perturbation Signatures	DiestVMaleAccent1 (Diestrus vs Male, female high/KO upreg, male low/KO downreg)	50	314	2.17295e-09	3.35809	1.11376e-11	84.6934	SMG1;GMFB;DOCK8;CLTC;IKZF2;ACTB;PITPNC1;DOCK10;NIPBL;COL4A3BP;RNF114;SESN3;EP300;ZYG11B;CNOT6L;NCOA3;FOS;PTP4A2;MARF1;NCOR1;HECA;KMT2A;KMT2C;MYCBP2;PIK3R1;PDS5A;STK4;MCMBP;MCL1;ARFGEF1;ATF7IP;CREBBP;UBE2H;EDEM1;HUWE1;PRRC2C;NUP153;HELZ;TMEM64;KLHL24;HIPK1;CORO2A;EEF2;GATAD2B;KBTBD11;PUM2;PAN3;CNOT1;TRIP12;FRYL
IKZF4 KO MOUSE GSE40273 CREEDSID GENE 1061 DOWN	Lit Mined TF Perturbation Signatures	EstVMaleAccent1 (Estrus vs Male, female high/KO upreg, male low/KO downreg)	50	314	2.17295e-09	3.35809	1.11376e-11	84.6934	SMG1;GMFB;DOCK8;CLTC;IKZF2;ACTB;PITPNC1;DOCK10;NIPBL;COL4A3BP;RNF114;SESN3;EP300;ZYG11B;CNOT6L;NCOA3;FOS;PTP4A2;MARF1;NCOR1;HECA;KMT2A;KMT2C;MYCBP2;PIK3R1;PDS5A;STK4;MCMBP;MCL1;ARFGEF1;ATF7IP;CREBBP;UBE2H;EDEM1;HUWE1;PRRC2C;NUP153;HELZ;TMEM64;KLHL24;HIPK1;CORO2A;EEF2;GATAD2B;KBTBD11;PUM2;PAN3;CNOT1;TRIP12;FRYL
IKZF4 KO MOUSE GSE40273 CREEDSID GENE 1061 DOWN	Lit Mined TF Perturbation Signatures	DiestVMaleAccent3 (Diestrus vs Male, female low/KO downreg, male high/KO upreg)	50	314	2.17295e-09	3.35809	1.11376e-11	84.6934	SMG1;GMFB;DOCK8;CLTC;IKZF2;ACTB;PITPNC1;DOCK10;NIPBL;COL4A3BP;RNF114;SESN3;EP300;ZYG11B;CNOT6L;NCOA3;FOS;PTP4A2;MARF1;NCOR1;HECA;KMT2A;KMT2C;MYCBP2;PIK3R1;PDS5A;STK4;MCMBP;MCL1;ARFGEF1;ATF7IP;CREBBP;UBE2H;EDEM1;HUWE1;PRRC2C;NUP153;HELZ;TMEM64;KLHL24;HIPK1;CORO2A;EEF2;GATAD2B;KBTBD11;PUM2;PAN3;CNOT1;TRIP12;FRYL
Genes Up-Regulated In Sst/Npy-expressing Interneurons Of zQ175DN Vs WT PMID32681824	HDSigDB 2021	DiestVMaleAccent1 (Diestrus vs Male, female high/KO upreg, male low/KO downreg)	55	398	2.45215e-09	2.8446	2.84123e-10	62.5289	DGKG;CYFIP1;KDM5C;FRMPD4;DGKB;ADK;ABAT;SYNE1;DSTYK;SIPA1L1;ZMIZ1;TNR;PHACTR1;KDM6A;GGPS1;MAGI2;USP45;SPTB;ARHGEF9;EEF1A2;TBC1D24;PKP4;XPR1;GRAMD1B;INO80D;CUL5;NUFIP2;STAU2;ANKRD12;PRICKLE2;LARP1;ATXN1;FAM168A;TNKS2;SNTG1;FAM120C;ZMAT4;UBR5;MAP4;LRRC4C;PAK3;LONRF2;CBX5;IQSEC3;RAB27B;SORBS1;ARHGAP26;HS3ST4;DIAPH2;FER;PPP2R2C;CNOT1;AGO1;TAOK1;BMT2
[truncated: 5,567 more rows]

## Sheet: 6e-Recurren terms in ∆DE enrich
Term	N_enriched_sexDE_patterns	enriched_patterns
UBTF ENCODE	1	DiestVMaleAccent1
YY1 ENCODE	1	DiestVMaleAccent1
AR CHEA	1	DiestVMaleAccent1
CREB1 CHEA	1	DiestVMaleAccent1
SALL4 CHEA	1	DiestVMaleAccent1
ZNF384 ENCODE	1	DiestVMaleAccent1
CHD1 ENCODE	1	DiestVMaleAccent1
TAF1 ENCODE	1	DiestVMaleAccent1
SMAD4 CHEA	1	DiestVMaleAccent1
[truncated: 1,637 more rows]
